# Supplementary material for: Yeast-Based Genetic Interaction Analysis of Human Kinome
Source: Cells. 2020 May 7;9(5):1156. doi: 10.3390/cells9051156 (PMC7291280; doi:10.3390/cells9051156)
Supplement: Supplementary file 1 [file cells-09-01156-s001.zip]

Archive with 10 entries (10 files):
- Supplementary Figures.pdf
- __MACOSX/._Supplementary Figures.pdf
- Supplementary_Table_S1.xlsx
- __MACOSX/._Supplementary_Table_S1.xlsx
- Supplementary_Table_S2.xlsx
- __MACOSX/._Supplementary_Table_S2.xlsx
- Supplementary_Table_S3.xlsx
- __MACOSX/._Supplementary_Table_S3.xlsx
- Supplementary_Table_S4.xlsx
- __MACOSX/._Supplementary_Table_S4.xlsx
