# Supplementary material for: Yeast-Based Genetic Interaction Analysis of Human Kinome
Source: Cells. 2020 May 7;9(5):1156. doi: 10.3390/cells9051156 (PMC7291280; doi:10.3390/cells9051156)
Supplement: Supplementary file 1 [file cells-09-01156-s001.zip › Supplementary_Table_S1.xlsx]

## Sheet: Kinase list
Table S1. List of human kinases.
No.	Entry clone ID	Gene symbol	Gene id	Gene description
1	ENTRY00001	LOC646505	646505	similar to Dual specificity protein kinase CLK3 (CDC-like kinase 3);unassigned
2	ENTRY00002	LOC730000	730000	similar to testis-specific serine kinase 6;unassigned
3	ENTRY00003	LOC727761	727761	similar to deoxythymidylate kinase (thymidylate kinase);unassigned
4	ENTRY00004	NME1-NME2	654364	NME1-NME2 protein;NME1-NME2
5	ENTRY00005	CRKL	1399	v-crk sarcoma virus CT10 oncogene homolog (avian)-like;CRKL
6	ENTRY00006	CSNK1A1	1452	casein kinase 1, alpha 1
7	ENTRY00007	CCL4	6351	chemokine (C-C motif) ligand 4;CCL4
8	ENTRY00008	LOC653155	653155	similar to PRP4 pre-mRNA processing factor 4 homolog B;unassigned
9	ENTRY00009	C1orf57	84284	chromosome 1 open reading frame 57;C1orf57
10	ENTRY00010	CSNK2B	1460	casein kinase 2, beta polypeptide
11	ENTRY00011	PRKAB1	5564	protein kinase, AMP-activated, beta 1 non-catalytic subunit
12	ENTRY00012	LOC389599	389599	similar to amyotrophic lateral sclerosis 2 (juvenile) chromosome region, candidate 2; ILP-interacting protein ILPIPA
13	ENTRY00013	LOC653052	653052	similar to Homeodomain-interacting protein kinase 2 (hHIPk2);unassigned
14	ENTRY00014	LOC652722	652722	similar to PTK2 protein tyrosine kinase 2 isoform a;unassigned
15	ENTRY00015	CIB1	10519	calcium and integrin binding 1 (calmyrin);CIB1
16	ENTRY00016	LOC388957	388957	similar to BMP2 inducible kinase
17	ENTRY00017	LOC650122	650122	similar to choline kinase alpha isoform a;unassigned
18	ENTRY00018	FLJ25006	124923	hypothetical protein FLJ25006
19	ENTRY00019	CDK3	1018	cyclin-dependent kinase 3
20	ENTRY00020	LOC54103	54103	hypothetical protein LOC54103;LOC54103
21	ENTRY00021	STK19	8859	serine/threonine kinase 19
22	ENTRY00022	LOC732306	732306	similar to vaccinia related kinase 2;unassigned
23	ENTRY00023	LOC442075	442075	similar to serine/threonine kinase, establishes embryonic polarity; asymmetrically distributed., abnormal embryonic PARtitioning of cytoplasm PAR-1, ZYGote defective : embryonic lethal ZYG-14 (126.3 kD) (par-1)
24	ENTRY00024	LOC390877	390877	similar to adenylate kinase (EC 2.7.4.3), cytosolic - common carp
25	ENTRY00025	AURKC	6795	aurora kinase C
26	ENTRY00026	FLJ23356	84197	hypothetical protein FLJ23356
27	ENTRY00027	PRKAR1B	5575	protein kinase, cAMP-dependent, regulatory, type I, beta
28	ENTRY00028	FLJ40852	285962	hypothetical protein FLJ40852
29	ENTRY00029	SGK2	10110	serum/glucocorticoid regulated kinase 2
30	ENTRY00030	LOC647279	647279	similar to MAP/microtubule affinity-regulating kinase 3;unassigned
31	ENTRY00031	GUK1	2987	guanylate kinase 1
32	ENTRY00032	DCK	1633	deoxycytidine kinase
33	ENTRY00033	CDKL4	344387	cyclin-dependent kinase-like 4
34	ENTRY00034	PRKX	5613	protein kinase, X-linked
35	ENTRY00035	PANK3	79646	pantothenate kinase 3
36	ENTRY00036	PHKG1	5260	phosphorylase kinase, gamma 1 (muscle)
37	ENTRY00037	CIB4	130106	calcium and integrin binding family member 4;CIB4
38	ENTRY00038	LOC91461	91461	hypothetical protein BC007901
39	ENTRY00039	PRPS1L1	221823	phosphoribosyl pyrophosphate synthetase 1-like 1;PRPS1L1
40	ENTRY00040	CDKL1	8814	cyclin-dependent kinase-like 1 (CDC2-related kinase)
41	ENTRY00041	DAPK2	23604	death-associated protein kinase 2
42	ENTRY00042	LOC649288	649288	similar to Adenylate kinase isoenzyme 4, mitochondrial (Adenylate kinase 3-like 1) (ATP-AMP transphosphorylase);unassigned
43	ENTRY00043	NME2	4831	nucleoside-diphosphate kinase 2
44	ENTRY00044	ITGB1BP3	27231	integrin beta 1 binding protein 3;ITGB1BP3
45	ENTRY00045	LOC652799	652799	similar to Mast/stem cell growth factor receptor precursor (SCFR) (Proto-oncogene tyrosine-protein kinase Kit) (c-kit) (CD117 antigen);unassigned
46	ENTRY00046	NEK7	140609	NIMA (never in mitosis gene a)-related kinase 7
47	ENTRY00047	SLAMF6	114836	SLAM family member 6;SLAMF6
48	ENTRY00048	TSSK2	23617	serine/threonine kinase 22B (spermiogenesis associated)
49	ENTRY00049	LOC340156	340156	hypothetical protein LOC340156
50	ENTRY00050	BMP2KL	347359	BMP2 inducible kinase-like
51	ENTRY00051	CSNK1G3	1456	casein kinase 1, gamma 3
52	ENTRY00052	ACVR2B	93	activin A receptor, type IIB
53	ENTRY00053	GRK7	131890	G protein-coupled receptor kinase 7
54	ENTRY00054	CDC7	8317	CDC7 cell division cycle 7 (S. cerevisiae)
55	ENTRY00055	MARK2	2011	MAP/microtubule affinity-regulating kinase 2
56	ENTRY00056	SNRK	54861	SNF-1 related kinase
57	ENTRY00057	MAP2K1	5604	mitogen-activated protein kinase kinase 1
58	ENTRY00058	PLXNB2	23654	plexin B2;PLXNB2
59	ENTRY00059	CAMK2A	815	calcium/calmodulin-dependent protein kinase (CaM kinase) II alpha
60	ENTRY00060	CAMK2G	818	calcium/calmodulin-dependent protein kinase (CaM kinase) II gamma
61	ENTRY00061	BRD3	8019	bromodomain containing 3
62	ENTRY00062	MPP7	143098	membrane protein, palmitoylated 7 (MAGUK p55 subfamily member 7);MPP7
63	ENTRY00063	IRAK2	3656	interleukin-1 receptor-associated kinase 2
64	ENTRY00064	PRKG1	5592	protein kinase, cGMP-dependent, type I
65	ENTRY00065	PFKFB1	5207	6-phosphofructo-2-kinase/fructose-2,6-biphosphatase 1
66	ENTRY00066	IPPK	64768	inositol 1,3,4,5,6-pentakisphosphate 2-kinase;IPPK
67	ENTRY00067	MPP6	51678	membrane protein, palmitoylated 6 (MAGUK p55 subfamily member 6);MPP6
68	ENTRY00068	MPP4	58538	membrane protein, palmitoylated 4 (MAGUK p55 subfamily member 4);MPP4
69	ENTRY00069	NEK8	284086	NIMA (never in mitosis gene a)- related kinase 8
70	ENTRY00070	PANK4	55229	pantothenate kinase 4
71	ENTRY00071	MAPK8	5599	mitogen-activated protein kinase 8
72	ENTRY00072	CDKL2	8999	cyclin-dependent kinase-like 2 (CDC2-related kinase)
73	ENTRY00073	CAMKK2	10645	calcium/calmodulin-dependent protein kinase kinase 2, beta
74	ENTRY00074	BMP2K	55589	BMP2 inducible kinase
75	ENTRY00075	PRKCQ	5588	protein kinase C, theta
76	ENTRY00076	CDC2L2	985	cell division cycle 2-like 2 (PITSLRE proteins)
77	ENTRY00077	MAPKAPK2	9261	mitogen-activated protein kinase-activated protein kinase 2
78	ENTRY00078	PGK1	5230	phosphoglycerate kinase 1
79	ENTRY00079	CHKA	1119	choline kinase alpha
80	ENTRY00080	CDC2L6	23097	cell division cycle 2-like 6 (CDK8-like)
81	ENTRY00081	FASTKD3	79072	FAST kinase domains 3;FASTKD3
82	ENTRY00082	MPP3	4356	membrane protein, palmitoylated 3 (MAGUK p55 subfamily member 3);MPP3
83	ENTRY00083	BRSK2	9024	serine/threonine kinase 29
84	ENTRY00084	NEK5	341676	NIMA (never in mitosis gene a)-related kinase 5
85	ENTRY00085	PRKG2	5593	protein kinase, cGMP-dependent, type II
86	ENTRY00086	DAPK3	1613	death-associated protein kinase 3
87	ENTRY00087	NEK10	152110	NIMA (never in mitosis gene a)- related kinase 10
88	ENTRY00088	TGFBR1	7046	transforming growth factor, beta receptor I (activin A receptor type II-like kinase, 53kDa)
89	ENTRY00089	PAK3	5063	p21 (CDKN1A)-activated kinase 3
90	ENTRY00090	SRPK3	26576	serine/threonine kinase 23
91	ENTRY00091	MAPK4	5596	mitogen-activated protein kinase 4
92	ENTRY00092	RIPK1	8737	receptor (TNFRSF)-interacting serine-threonine kinase 1
93	ENTRY00093	KSR	8844	kinase suppressor of ras
94	ENTRY00094	UHMK1	127933	U2AF homology motif (UHM) kinase 1
95	ENTRY00095	PFKFB2	5208	6-phosphofructo-2-kinase/fructose-2,6-biphosphatase 2
96	ENTRY00096	GTF2H1	2965	general transcription factor IIH, polypeptide 1, 62kDa;GTF2H1
97	ENTRY00097	RKHD3	84206	ring finger and KH domain containing 3;RKHD3
98	ENTRY00098	MPP5	64398	membrane protein, palmitoylated 5 (MAGUK p55 subfamily member 5);MPP5
99	ENTRY00099	GNE	10020	glucosamine (UDP-N-acetyl)-2-epimerase/N-acetylmannosamine kinase
100	ENTRY00100	IHPK3	117283	inositol hexaphosphate kinase 3
101	ENTRY00101	PIP5K2C	79837	phosphatidylinositol-4-phosphate 5-kinase, type II, gamma
102	ENTRY00102	DLG3	1741	discs, large homolog 3 (neuroendocrine-dlg, Drosophila);DLG3
103	ENTRY00103	PRKR	5610	protein kinase, interferon-inducible double stranded RNA dependent
104	ENTRY00104	AMHR2	269	anti-Mullerian hormone receptor, type II
105	ENTRY00105	MAP3K2	10746	mitogen-activated protein kinase kinase kinase 2
106	ENTRY00106	BRD4	23476	bromodomain containing 4
107	ENTRY00107	MAST2	23139	microtubule associated serine/threonine kinase 2
108	ENTRY00108	PIK3C3	5289	phosphoinositide-3-kinase, class 3
109	ENTRY00109	SCYL2	55681	hypothetical protein FLJ10074
110	ENTRY00110	NEK9	91754	NIMA (never in mitosis gene a)- related kinase 9
111	ENTRY00111	RPS6KC1	26750	ribosomal protein S6 kinase, 52kDa, polypeptide 1
112	ENTRY00112	STK36	27148	serine/threonine kinase 36 (fused homolog, Drosophila)
113	ENTRY00113	CDC2L1	984	cell division cycle 2-like 1 (PITSLRE proteins)
114	ENTRY00114	CDKL5	6792	cyclin-dependent kinase-like 5
115	ENTRY00115	DGKZ	8525	diacylglycerol kinase, zeta 104kDa
116	ENTRY00116	PRPF4B	8899	PRP4 pre-mRNA processing factor 4 homolog B (yeast)
117	ENTRY00117	PIK3CA	5290	phosphoinositide-3-kinase, catalytic, alpha polypeptide
118	ENTRY00118	HIPK3	10114	homeodomain interacting protein kinase 3
119	ENTRY00119	ALDH18A1	5832	aldehyde dehydrogenase 18 family, member A1;ALDH18A1
120	ENTRY00120	TNNI3K	51086	TNNI3 interacting kinase
121	ENTRY00121	CASK	8573	calcium/calmodulin-dependent serine protein kinase (MAGUK family)
122	ENTRY00122	PHKA1	5255	phosphorylase kinase, alpha 1 (muscle)
123	ENTRY00123	GSG2	83903	haspin
124	ENTRY00124	MAP3K11	4296	mitogen-activated protein kinase kinase kinase 11
125	ENTRY00125	ULK2	9706	unc-51-like kinase 2 (C. elegans)
126	ENTRY00126	DKFZp761P0423	157285	hypothetical protein DKFZp761P0423
127	ENTRY00127	TRPM7	54822	transient receptor potential cation channel, subfamily M, member 7
128	ENTRY00128	DGKB	1607	diacylglycerol kinase, beta 90kDa
129	ENTRY00129	TGFBR3	7049	transforming growth factor, beta receptor III (betaglycan, 300kDa);TGFBR3
130	ENTRY00130	NPR2	4882	natriuretic peptide receptor B/guanylate cyclase B (atrionatriuretic peptide receptor B)
131	ENTRY00131	DAPK1	1612	death-associated protein kinase 1
132	ENTRY00132	HIPK2	28996	homeodomain interacting protein kinase 2
133	ENTRY00133	CARD11	84433	caspase recruitment domain family, member 11;CARD11
134	ENTRY00134	PIK3C2G	5288	phosphoinositide-3-kinase, class 2, gamma polypeptide
135	ENTRY00135	MAP4K1	11184	mitogen-activated protein kinase kinase kinase kinase 1
136	ENTRY00136	LATS2	26524	LATS, large tumor suppressor, homolog 2 (Drosophila)
137	ENTRY00137	MAP4K4	9448	mitogen-activated protein kinase kinase kinase kinase 4
138	ENTRY00138	DGKK	139189	diacylglycerol kinase, kappa;DGKK
139	ENTRY00139	PIK3R4	30849	phosphoinositide-3-kinase, regulatory subunit 4, p150
140	ENTRY00140	LRGUK	136332	leucine-rich repeats and guanylate kinase domain containing;LRGUK
141	ENTRY00141	PRKD2	25865	protein kinase D2
142	ENTRY00142	ERN1	2081	endoplasmic reticulum to nucleus signalling 1
143	ENTRY00143	KIAA2002	79834	KIAA2002 protein
144	ENTRY00144	ALPK2	115701	alpha-kinase 2
145	ENTRY00145	BRAF	673	v-raf murine sarcoma viral oncogene homolog B1
146	ENTRY00146	PRKACA	5566	protein kinase, cAMP-dependent, catalytic, alpha
147	ENTRY00147	VRK1	7443	vaccinia related kinase 1
148	ENTRY00148	NEK4	6787	NIMA (never in mitosis gene a)-related kinase 4
149	ENTRY00149	MAPK1	5594	mitogen-activated protein kinase 1
150	ENTRY00150	MAP3K15	389840	FLJ16518 protein
151	ENTRY00151	PRKD1	5587	protein kinase D1
152	ENTRY00152	KSR2	283455	kinase suppressor of Ras-2
153	ENTRY00153	TRIB1	10221	tribbles homolog 1 (Drosophila)
154	ENTRY00154	PI4KII	55361	phosphatidylinositol 4-kinase type II
155	ENTRY00155	PINK1	65018	PTEN induced putative kinase 1
156	ENTRY00156	DLG1	1739	discs, large homolog 1 (Drosophila);DLG1
157	ENTRY00157	PRKY	5616	protein kinase, Y-linked
158	ENTRY00158	PI4K2B	55300	phosphatidylinositol 4-kinase type-II beta
159	ENTRY00159	DKFZp434B1231	91156	eEF1A2 binding protein;DKFZp434B1231
160	ENTRY00160	MAPK3	5595	mitogen-activated protein kinase 3
161	ENTRY00161	GSK3A	2931	glycogen synthase kinase 3 alpha
162	ENTRY00162	LIMK1	3984	LIM domain kinase 1
163	ENTRY00163	DYRK1A	1859	dual-specificity tyrosine-(Y)-phosphorylation regulated kinase 1A
164	ENTRY00164	LOC648152	648152	similar to ataxia telangiectasia and Rad3 related protein;unassigned
165	ENTRY00165	PSKH1	5681	protein serine kinase H1
166	ENTRY00166	MASTL	84930	microtubule associated serine/threonine kinase-like
167	ENTRY00167	WNK4	65266	protein kinase, lysine deficient 4
168	ENTRY00168	MAP3K5	4217	mitogen-activated protein kinase kinase kinase 5
169	ENTRY00169	PLXNA3	55558	plexin A3;PLXNA3
170	ENTRY00170	TPR	7175	translocated promoter region (to activated MET oncogene);TPR
171	ENTRY00171	LRRK2	120892	leucine-rich repeat kinase 2
172	ENTRY00172	LRPPRC	10128	leucine-rich PPR-motif containing;LRPPRC
173	ENTRY00173	MINK1	50488	misshapen/NIK-related kinase
174	ENTRY00174	MAGI1	9223	membrane associated guanylate kinase, WW and PDZ domain containing 1;MAGI1
175	ENTRY00175	MYO3B	140469	myosin IIIB
176	ENTRY00176	CDC42BPG	55561	CDC42 binding protein kinase gamma (DMPK-like)
177	ENTRY00177	PHKA2	5256	phosphorylase kinase, alpha 2 (liver)
178	ENTRY00178	CHEK1	1111	CHK1 checkpoint homolog (S. pombe)
179	ENTRY00179	DGKG	1608	diacylglycerol kinase, gamma 90kDa
180	ENTRY00180	RPS6KA2	6196	ribosomal protein S6 kinase, 90kDa, polypeptide 2
181	ENTRY00181	MKNK1	8569	MAP kinase interacting serine/threonine kinase 1
182	ENTRY00182	AURKA	6790	serine/threonine kinase 6
183	ENTRY00183	RPS6KB2	6199	ribosomal protein S6 kinase, 70kDa, polypeptide 2
184	ENTRY00184	VRK2	7444	vaccinia related kinase 2
185	ENTRY00185	RIOK2	55781	RIO kinase 2 (yeast)
186	ENTRY00186	IKBKE	9641	inhibitor of kappa light polypeptide gene enhancer in B-cells, kinase epsilon
187	ENTRY00187	RIOK3	8780	RIO kinase 3 (yeast)
188	ENTRY00188	RPS6KA3	6197	ribosomal protein S6 kinase, 90kDa, polypeptide 3
189	ENTRY00189	MAP3K8	1326	mitogen-activated protein kinase kinase kinase 8
190	ENTRY00190	AKT3	10000	v-akt murine thymoma viral oncogene homolog 3 (protein kinase B, gamma)
191	ENTRY00191	RPS6KA6	27330	ribosomal protein S6 kinase, 90kDa, polypeptide 6
192	ENTRY00192	PIK4CA	5297	phosphatidylinositol 4-kinase, catalytic, alpha polypeptide
193	ENTRY00193	PIK3CB	5291	phosphoinositide-3-kinase, catalytic, beta polypeptide
194	ENTRY00194	PAK1	5058	p21/Cdc42/Rac1-activated kinase 1 (STE20 homolog, yeast)
195	ENTRY00195	CAMK1	8536	calcium/calmodulin-dependent protein kinase I
196	ENTRY00196	LOC340371	340371	hypothetical protein LOC340371
197	ENTRY00197	LOC91807	91807	myosin light chain kinase (MLCK)
198	ENTRY00198	MORN2	378464	MORN repeat containing 2;MORN2
199	ENTRY00199	PFTK1	5218	PFTAIRE protein kinase 1
200	ENTRY00200	PRKAG3	53632	protein kinase, AMP-activated, gamma 3 non-catalytic subunit
201	ENTRY00201	PRKCA	5578	protein kinase C, alpha
202	ENTRY00202	PRKCE	5581	protein kinase C, epsilon
203	ENTRY00203	CCL2	6347	chemokine (C-C motif) ligand 2;CCL2
204	ENTRY00204	TSSK3	81629	serine/threonine kinase 22C (spermiogenesis associated)
205	ENTRY00205	GK5	256356	hypothetical protein MGC40579;MGC40579
206	ENTRY00206	MAP2K2	5605	mitogen-activated protein kinase kinase 2
207	ENTRY00207	PDK3	5165	pyruvate dehydrogenase kinase, isoenzyme 3
208	ENTRY00208	FLJ10986	55277	hypothetical protein FLJ10986;FLJ10986
209	ENTRY00209	IHPK1	9807	inositol hexaphosphate kinase 1
210	ENTRY00210	NUP62	23636	nucleoporin 62kDa;NUP62
211	ENTRY00211	FASTKD5	60493	FAST kinase domains 5;FASTKD5
212	ENTRY00212	RP6-213H19.1	51765	Mst3 and SOK1-related kinase
213	ENTRY00213	NME6	10201	non-metastatic cells 6, protein expressed in (nucleoside-diphosphate kinase)
214	ENTRY00214	DTYMK	1841	deoxythymidylate kinase (thymidylate kinase)
215	ENTRY00215	AK3L1	205	adenylate kinase 3
216	ENTRY00216	STK16	8576	serine/threonine kinase 16
217	ENTRY00217	SH3BP5L	80851	SH3-binding domain protein 5-like;SH3BP5L
218	ENTRY00218	ACVR1B	91	activin A receptor, type IB
219	ENTRY00219	NRBP	29959	nuclear receptor binding protein
220	ENTRY00220	COL4A3BP	10087	collagen, type IV, alpha 3 (Goodpasture antigen) binding protein;COL4A3BP
221	ENTRY00221	EIF2AK1	27102	heme-regulated initiation factor 2-alpha kinase
222	ENTRY00222	ASCIZ	23300	ATM/ATR-Substrate Chk2-Interacting Zn2+-finger protein;ASCIZ
223	ENTRY00223	PNCK	139728	pregnancy upregulated non-ubiquitously expressed CaM kinase
224	ENTRY00224	NME1	4830	nucleoside-diphosphate kinase 1
225	ENTRY00225	NME3	4832	nucleoside-diphosphate kinase 3
226	ENTRY00226	AK1	203	adenylate kinase 1
227	ENTRY00227	C9orf95	54981	chromosome 9 open reading frame 95;C9orf95
228	ENTRY00228	PDK4	5166	pyruvate dehydrogenase kinase, isoenzyme 4
229	ENTRY00229	AGK	55750	multiple substrate lipid kinase;MULK
230	ENTRY00230	SH3BP5	9467	SH3-domain binding protein 5 (BTK-associated);SH3BP5
231	ENTRY00231	PRKD3	23683	protein kinase D3
232	ENTRY00232	PAPSS2	9060	3'-phosphoadenosine 5'-phosphosulfate synthase 2;PAPSS2
233	ENTRY00233	SRPK1	6732	SFRS protein kinase 1
234	ENTRY00234	PANK2	80025	pantothenate kinase 2 (Hallervorden-Spatz syndrome)
235	ENTRY00235	NME4	4833	nucleoside-diphosphate kinase 4
236	ENTRY00236	DCAKD	79877	dephospho-CoA kinase domain containing;DCAKD
237	ENTRY00237	KHK	3795	ketohexokinase (fructokinase)
238	ENTRY00238	PIM2	11040	pim-2 oncogene
239	ENTRY00239	PRPS1	5631	phosphoribosyl pyrophosphate synthetase 1;PRPS1
240	ENTRY00240	TRIB2	28951	tribbles homolog 2 (Drosophila)
241	ENTRY00241	CD2	914	CD2 antigen (p50), sheep red blood cell receptor;CD2
242	ENTRY00242	PDGFRL	5157	platelet-derived growth factor receptor-like;PDGFRL
243	ENTRY00243	KIAA0999	23387	KIAA0999 protein
244	ENTRY00244	PDK2	5164	pyruvate dehydrogenase kinase, isoenzyme 2
245	ENTRY00245	MAPK9	5601	mitogen-activated protein kinase 9
246	ENTRY00246	STK24	8428	serine/threonine kinase 24 (STE20 homolog, yeast)
247	ENTRY00247	MGC42105	167359	hypothetical protein MGC42105
248	ENTRY00248	BRSK1	84446	KIAA1811 protein
249	ENTRY00249	C9orf98	158067	chromosome 9 open reading frame 98;C9orf98
250	ENTRY00250	SGK3	23678	serum/glucocorticoid regulated kinase-like
251	ENTRY00251	FGFRL1	53834	fibroblast growth factor receptor-like 1;FGFRL1
252	ENTRY00252	LOC220686	220686	hypothetical protein LOC220686;LOC220686
253	ENTRY00253	TXNDC3	51314	thioredoxin domain containing 3 (spermatozoa);TXNDC3
254	ENTRY00254	FASTKD1	79675	FAST kinase domains 1;FASTKD1
255	ENTRY00255	DCAMKL2	166614	hypothetical protein MGC45428
256	ENTRY00256	FASTKD2	22868	FAST kinase domains 2;FASTKD2
257	ENTRY00257	HSPB8	26353	heat shock 22kDa protein 8
258	ENTRY00258	TRIM27	5987	tripartite motif-containing 27;TRIM27
259	ENTRY00259	PLXNA4B	91584	plexin A4, B;PLXNA4B
260	ENTRY00260	CABC1	56997	chaperone, ABC1 activity of bc1 complex like (S. pombe)
261	ENTRY00261	MGC16169	93627	hypothetical protein MGC16169
262	ENTRY00262	MAP4K5	11183	mitogen-activated protein kinase kinase kinase kinase 5
263	ENTRY00263	BUB1	699	BUB1 budding uninhibited by benzimidazoles 1 homolog (yeast)
264	ENTRY00264	HKDC1	80201	hexokinase domain containing 1;HKDC1
265	ENTRY00265	SCYL1	57410	SCY1-like 1 (S. cerevisiae)
266	ENTRY00266	ACVR1C	130399	activin A receptor, type IC
267	ENTRY00267	YSK4	80122	hypothetical protein FLJ23074
268	ENTRY00268	SNX16	64089	sorting nexin 16;SNX16
269	ENTRY00269	BMPR1A	657	bone morphogenetic protein receptor, type IA
270	ENTRY00270	ARSG	22901	arylsulfatase G;ARSG
271	ENTRY00271	FXN	2395	frataxin;FXN
272	ENTRY00272	PRPS2	5634	phosphoribosyl pyrophosphate synthetase 2;PRPS2
273	ENTRY00273	TGFBR2	7048	transforming growth factor, beta receptor II (70/80kDa)
274	ENTRY00274	MAK	4117	male germ cell-associated kinase
275	ENTRY00275	PGK2	5232	phosphoglycerate kinase 2
276	ENTRY00276	MAP3K12	7786	mitogen-activated protein kinase kinase kinase 12
277	ENTRY00277	IRAK3	11213	interleukin-1 receptor-associated kinase 3
278	ENTRY00278	CDKL3	51265	cyclin-dependent kinase-like 3
279	ENTRY00279	TLK2	11011	tousled-like kinase 2
280	ENTRY00280	ALPK1	80216	alpha-kinase 1
281	ENTRY00281	PIP5KL1	138429	phosphatidylinositol-4-phosphate 5-kinase-like 1
282	ENTRY00282	FN3K	64122	fructosamine 3 kinase
283	ENTRY00283	ALS2CR7	65061	amyotrophic lateral sclerosis 2 (juvenile) chromosome region, candidate 7
284	ENTRY00284	LYK5	92335	protein kinase LYK5
285	ENTRY00285	ETNK1	55500	ethanolamine kinase 1
286	ENTRY00286	DYRK3	8444	dual-specificity tyrosine-(Y)-phosphorylation regulated kinase 3
287	ENTRY00287	RP2	6102	retinitis pigmentosa 2 (X-linked recessive);RP2
288	ENTRY00288	MAPKAPK5	8550	mitogen-activated protein kinase-activated protein kinase 5
289	ENTRY00289	BMPR1B	658	bone morphogenetic protein receptor, type IB
290	ENTRY00290	XYLB	9942	xylulokinase homolog (H. influenzae)
291	ENTRY00291	PRKCG	5582	protein kinase C, gamma
292	ENTRY00292	RPS6KA4	8986	ribosomal protein S6 kinase, 90kDa, polypeptide 4
293	ENTRY00293	NLK	51701	nemo like kinase
294	ENTRY00294	SH3BP4	23677	SH3-domain binding protein 4;SH3BP4
295	ENTRY00295	MAP4K2	5871	mitogen-activated protein kinase kinase kinase kinase 2
296	ENTRY00296	RAGE	5891	renal tumor antigen
297	ENTRY00297	ULK3	25989	DKFZP434C131 protein
298	ENTRY00298	PRKAB2	5565	protein kinase, AMP-activated, beta 2 non-catalytic subunit
299	ENTRY00299	NJMU-R1	64149	protein kinase Njmu-R1
300	ENTRY00300	MAPK10	5602	mitogen-activated protein kinase 10
301	ENTRY00301	ADCK1	57143	aarF domain containing kinase 1
302	ENTRY00302	PTK9	5756	PTK9 protein tyrosine kinase 9
303	ENTRY00303	CDK10	8558	cyclin-dependent kinase (CDC2-like) 10
304	ENTRY00304	GLYCTK	132158	glycerate kinase
305	ENTRY00305	ACVR2A	92	activin A receptor, type II
306	ENTRY00306	PAK2	5062	p21 (CDKN1A)-activated kinase 2
307	ENTRY00307	MYLK2	85366	myosin light chain kinase 2, skeletal muscle
308	ENTRY00308	MOS	4342	v-mos Moloney murine sarcoma viral oncogene homolog
309	ENTRY00309	NEK2	4751	NIMA (never in mitosis gene a)-related kinase 2
310	ENTRY00310	TPK1	27010	thiamin pyrophosphokinase 1
311	ENTRY00311	COASY	80347	Coenzyme A synthase;COASY
312	ENTRY00312	CDK8	1024	cyclin-dependent kinase 8
313	ENTRY00313	RIPK5	25778	receptor interacting protein kinase 5
314	ENTRY00314	LOC375133	375133	similar to phosphatidylinositol 4-kinase alpha
315	ENTRY00315	MAP4K3	8491	mitogen-activated protein kinase kinase kinase kinase 3
316	ENTRY00316	LATS1	9113	LATS, large tumor suppressor, homolog 1 (Drosophila)
317	ENTRY00317	IPMK	253430	inositol polyphosphate multikinase
318	ENTRY00318	PRKAR2B	5577	protein kinase, cAMP-dependent, regulatory, type II, beta
319	ENTRY00319	PFKFB3	5209	6-phosphofructo-2-kinase/fructose-2,6-biphosphatase 3
320	ENTRY00320	BMPR2	659	bone morphogenetic protein receptor, type II (serine/threonine kinase)
321	ENTRY00321	WNK1	65125	protein kinase, lysine deficient 1
322	ENTRY00322	PRKAA2	5563	protein kinase, AMP-activated, alpha 2 catalytic subunit
323	ENTRY00323	PKLR	5313	pyruvate kinase, liver and RBC
324	ENTRY00324	MPP2	4355	membrane protein, palmitoylated 2 (MAGUK p55 subfamily member 2);MPP2
325	ENTRY00325	EXOSC10	5394	exosome component 10;EXOSC10
326	ENTRY00326	XRCC6BP1	91419	XRCC6 binding protein 1;XRCC6BP1
327	ENTRY00327	AK2	204	adenylate kinase 2
328	ENTRY00328	TRIB3	57761	tribbles homolog 3 (Drosophila)
329	ENTRY00329	CSNK2A1	1457	casein kinase 2, alpha 1 polypeptide
330	ENTRY00330	FN3KRP	79672	fructosamine-3-kinase-related protein
331	ENTRY00331	SCYL3	57147	ezrin-binding partner PACE-1
332	ENTRY00332	RBKS	64080	ribokinase
333	ENTRY00333	AURKB	9212	aurora kinase B
334	ENTRY00334	SEPHS2	22928	selenophosphate synthetase 2;SEPHS2
335	ENTRY00335	FUK	197258	fucokinase
336	ENTRY00336	CLK2	1196	CDC-like kinase 2
337	ENTRY00337	RPS6KB1	6198	ribosomal protein S6 kinase, 70kDa, polypeptide 1
338	ENTRY00338	VRK3	51231	vaccinia related kinase 3
339	ENTRY00339	CDK6	1021	cyclin-dependent kinase 6
340	ENTRY00340	PRKAG2	51422	protein kinase, AMP-activated, gamma 2 non-catalytic subunit
341	ENTRY00341	DYRK2	8445	dual-specificity tyrosine-(Y)-phosphorylation regulated kinase 2
342	ENTRY00342	PLK2	10769	polo-like kinase 2 (Drosophila)
343	ENTRY00343	PIM1	5292	pim-1 oncogene
344	ENTRY00344	MAP3K7	6885	mitogen-activated protein kinase kinase kinase 7
345	ENTRY00345	MAP2K1IP1	8649	mitogen-activated protein kinase kinase 1 interacting protein 1
346	ENTRY00346	TESK2	10420	testis-specific kinase 2
347	ENTRY00347	PIK3R1	5295	phosphoinositide-3-kinase, regulatory subunit 1 (p85 alpha)
348	ENTRY00348	MAPK15	225689	extracellular signal-regulated kinase 8
349	ENTRY00349	RFK	55312	riboflavin kinase
350	ENTRY00350	CDK5	1020	cyclin-dependent kinase 5
351	ENTRY00351	TWF2	11344	PTK9L protein tyrosine kinase 9-like (A6-related protein)
352	ENTRY00352	CDK9	1025	cyclin-dependent kinase 9 (CDC2-related kinase)
353	ENTRY00353	NME7	29922	non-metastatic cells 7, protein expressed in (nucleoside-diphosphate kinase)
354	ENTRY00354	MVK	4598	mevalonate kinase (mevalonic aciduria)
355	ENTRY00355	SPHK1	8877	sphingosine kinase 1
356	ENTRY00356	CSNK1G2	1455	casein kinase 1, gamma 2
357	ENTRY00357	CKMT1A	548596	creatine kinase, mitochondrial 1A;CKMT1A
358	ENTRY00358	PLAU	5328	plasminogen activator, urokinase
359	ENTRY00359	SGK	6446	serum/glucocorticoid regulated kinase
360	ENTRY00360	ZAK	51776	sterile alpha motif and leucine zipper containing kinase AZK
361	ENTRY00361	PCTK3	5129	PCTAIRE protein kinase 3
362	ENTRY00362	ADCK4	79934	aarF domain containing kinase 4
363	ENTRY00363	FASTK	10922	FAST kinase
364	ENTRY00364	PAK4	10298	p21(CDKN1A)-activated kinase 4
365	ENTRY00365	SPHK2	56848	sphingosine kinase 2
366	ENTRY00366	MARK3	4140	MAP/microtubule affinity-regulating kinase 3
367	ENTRY00367	CCRK	23552	cell cycle related kinase
368	ENTRY00368	PRKAG1	5571	protein kinase, AMP-activated, gamma 1 non-catalytic subunit
369	ENTRY00369	MAPK12	6300	mitogen-activated protein kinase 12
370	ENTRY00370	STK32C	282974	serine/threonine kinase 32C
371	ENTRY00371	STK17B	9262	serine/threonine kinase 17b (apoptosis-inducing)
372	ENTRY00372	ADCK2	90956	aarF domain containing kinase 2
373	ENTRY00373	PXK	54899	PX domain containing serine/threonine kinase
374	ENTRY00374	PRKCZ	5590	protein kinase C, zeta
375	ENTRY00375	ARAF	369	v-raf murine sarcoma 3611 viral oncogene homolog 1
376	ENTRY00376	PCK2	5106	phosphoenolpyruvate carboxykinase 2 (mitochondrial)
377	ENTRY00377	EEF2K	29904	eukaryotic elongation factor-2 kinase
378	ENTRY00378	TLK1	9874	tousled-like kinase 1
379	ENTRY00379	PFKM	5213	phosphofructokinase, muscle
380	ENTRY00380	PFKL	5211	phosphofructokinase, liver
381	ENTRY00381	HK1	3098	hexokinase 1
382	ENTRY00382	HK3	3101	hexokinase 3 (white cell)
383	ENTRY00383	MAP3K14	9020	mitogen-activated protein kinase kinase kinase 14
384	ENTRY00384	PLK4	10733	polo-like kinase 4 (Drosophila)
385	ENTRY00385	CALM2	805	calmodulin 2 (phosphorylase kinase, delta)
386	ENTRY00386	MKNK2	2872	MAP kinase interacting serine/threonine kinase 2
387	ENTRY00387	TK1	7083	thymidine kinase 1, soluble
388	ENTRY00388	CSNK1G1	53944	casein kinase 1, gamma 1
389	ENTRY00389	PDIK1L	149420	PDLIM1 interacting kinase 1 like
390	ENTRY00390	MAPK13	5603	mitogen-activated protein kinase 13
391	ENTRY00391	TSSK1	83942	serine/threonine kinase 22D (spermiogenesis associated)
392	ENTRY00392	PRKAR1A	5573	protein kinase, cAMP-dependent, regulatory, type I, alpha (tissue specific extinguisher 1)
393	ENTRY00393	CKB	1152	creatine kinase, brain
394	ENTRY00394	GALK1	2584	galactokinase 1
395	ENTRY00395	PIP5K2A	5305	phosphatidylinositol-4-phosphate 5-kinase, type II, alpha
396	ENTRY00396	PHKG2	5261	phosphorylase kinase, gamma 2 (testis)
397	ENTRY00397	CKMT2	1160	creatine kinase, mitochondrial 2 (sarcomeric)
398	ENTRY00398	NADK	65220	NAD kinase
399	ENTRY00399	GALK2	2585	galactokinase 2
400	ENTRY00400	IRAK4	51135	interleukin-1 receptor-associated kinase 4
401	ENTRY00401	GCK	2645	glucokinase (hexokinase 4, maturity onset diabetes of the young 2)
402	ENTRY00402	MPP1	4354	membrane protein, palmitoylated 1, 55kDa;MPP1
403	ENTRY00403	AKT1	207	v-akt murine thymoma viral oncogene homolog 1
404	ENTRY00404	CLK3	1198	CDC-like kinase 3
405	ENTRY00405	PCTK1	5127	PCTAIRE protein kinase 1
406	ENTRY00406	PIP5K1A	8394	phosphatidylinositol-4-phosphate 5-kinase, type I, alpha
407	ENTRY00407	CAMKV	79012	hypothetical protein MGC8407
408	ENTRY00408	PKM2	5315	pyruvate kinase, muscle
409	ENTRY00409	RPS6KA5	9252	ribosomal protein S6 kinase, 90kDa, polypeptide 5
410	ENTRY00410	RIOK1	83732	RIO kinase 1 (yeast)
411	ENTRY00411	HIPK4	147746	homeodomain interacting protein kinase 4
412	ENTRY00412	DYRK1B	9149	dual-specificity tyrosine-(Y)-phosphorylation regulated kinase 1B
413	ENTRY00413	ITPKB	3707	inositol 1,4,5-trisphosphate 3-kinase B
414	ENTRY00414	AK7	122481	adenylate kinase 7
415	ENTRY00415	PRKCB1	5579	protein kinase C, beta 1
416	ENTRY00416	PRKCH	5583	protein kinase C, eta
417	ENTRY00417	SRPK2	6733	SFRS protein kinase 2
418	ENTRY00418	CKS1B	1163	CDC28 protein kinase regulatory subunit 1B
419	ENTRY00419	CALM1	801	calmodulin 1 (phosphorylase kinase, delta)
420	ENTRY00420	CALM3	808	calmodulin 3 (phosphorylase kinase, delta)
421	ENTRY00421	STK32A	202374	serine/threonine kinase 32A
422	ENTRY00422	PMVK	10654	phosphomevalonate kinase
423	ENTRY00423	NME5	8382	non-metastatic cells 5, protein expressed in (nucleoside-diphosphate kinase)
424	ENTRY00424	AK3	50808	adenylate kinase 3 like 1
425	ENTRY00425	TP53RK	112858	TP53 regulating kinase
426	ENTRY00426	TSSK6	83983	serine/threonine protein kinase SSTK
427	ENTRY00427	CDC2	983	cell division cycle 2, G1 to S and G2 to M
428	ENTRY00428	CDK2	1017	cyclin-dependent kinase 2
429	ENTRY00429	CDK4	1019	cyclin-dependent kinase 4
430	ENTRY00430	CDK5R1	8851	cyclin-dependent kinase 5, regulatory subunit 1 (p35)
431	ENTRY00431	PDXK	8566	pyridoxal (pyridoxine, vitamin B6) kinase
432	ENTRY00432	NEK6	10783	NIMA (never in mitosis gene a)-related kinase 6
433	ENTRY00433	PBK	55872	T-LAK cell-originated protein kinase
434	ENTRY00434	MAP2K6	5608	mitogen-activated protein kinase kinase 6
435	ENTRY00435	CSNK1A1L	122011	casein kinase 1, alpha 1-like
436	ENTRY00436	NAGK	55577	N-acetylglucosamine kinase
437	ENTRY00437	CDK7	1022	cyclin-dependent kinase 7 (MO15 homolog, Xenopus laevis, cdk-activating kinase)
438	ENTRY00438	PRKACB	5567	protein kinase, cAMP-dependent, catalytic, beta
439	ENTRY00439	PRKACG	5568	protein kinase, cAMP-dependent, catalytic, gamma
440	ENTRY00440	PRKAR2A	5576	protein kinase, cAMP-dependent, regulatory, type II, alpha
441	ENTRY00441	MAPKAPK3	7867	mitogen-activated protein kinase-activated protein kinase 3
442	ENTRY00442	CAMK1D	57118	calcium/calmodulin-dependent protein kinase ID
443	ENTRY00443	ETNK2	55224	ethanolamine kinase 2
444	ENTRY00444	ADRBK2	157	adrenergic, beta, receptor kinase 2
445	ENTRY00445	BCKDK	10295	branched chain alpha-ketoacid dehydrogenase kinase
446	ENTRY00446	STK32B	55351	serine/threonine kinase 32B
447	ENTRY00447	CSNK1D	1453	casein kinase 1, delta
448	ENTRY00448	CSNK1E	1454	casein kinase 1, epsilon
449	ENTRY00449	MAP2K7	5609	mitogen-activated protein kinase kinase 7
450	ENTRY00450	IHPK2	51447	inositol hexaphosphate kinase 2
451	ENTRY00451	STK25	10494	serine/threonine kinase 25 (STE20 homolog, yeast)
452	ENTRY00452	PDPK1	5170	3-phosphoinositide dependent protein kinase-1
453	ENTRY00453	STK11	6794	serine/threonine kinase 11 (Peutz-Jeghers syndrome)
454	ENTRY00454	STK40	83931	Ser/Thr-like kinase
455	ENTRY00455	PDK1	5163	pyruvate dehydrogenase kinase, isoenzyme 1
456	ENTRY00456	MAP2K5	5607	mitogen-activated protein kinase kinase 5
457	ENTRY00457	PIP5K3	200576	phosphatidylinositol-3-phosphate/phosphatidylinositol 5-kinase, type III
458	ENTRY00458	ILK	3611	integrin-linked kinase
459	ENTRY00459	PIK3R3	8503	phosphoinositide-3-kinase, regulatory subunit 3 (p55, gamma)
460	ENTRY00460	STK38L	23012	serine/threonine kinase 38 like
461	ENTRY00461	STK38	11329	serine/threonine kinase 38
462	ENTRY00462	CAMK4	814	calcium/calmodulin-dependent protein kinase IV
463	ENTRY00463	CAMK1G	57172	calcium/calmodulin-dependent protein kinase IG
464	ENTRY00464	CAMK2D	817	calcium/calmodulin-dependent protein kinase (CaM kinase) II delta
465	ENTRY00465	CARKL	23729	carbohydrate kinase-like
466	ENTRY00466	NEK11	79858	NIMA (never in mitosis gene a)- related kinase 11
467	ENTRY00467	CLK1	1195	CDC-like kinase 1
468	ENTRY00468	STK3	6788	serine/threonine kinase 3 (STE20 homolog, yeast)
469	ENTRY00469	PIK3R5	23533	phosphoinositide-3-kinase, regulatory subunit 5, p101
470	ENTRY00470	ADPGK	83440	ADP-dependent glucokinase
471	ENTRY00471	CAMK2B	816	calcium/calmodulin-dependent protein kinase (CaM kinase) II beta
472	ENTRY00472	NEK3	4752	NIMA (never in mitosis gene a)-related kinase 3
473	ENTRY00473	ACVR1	90	activin A receptor, type I
474	ENTRY00474	STK33	65975	serine/threonine kinase 33
475	ENTRY00475	CAMKK1	84254	calcium/calmodulin-dependent protein kinase kinase 1, alpha
476	ENTRY00476	DYRK4	8798	dual-specificity tyrosine-(Y)-phosphorylation regulated kinase 4
477	ENTRY00477	PNKP	11284	polynucleotide kinase 3'-phosphatase
478	ENTRY00478	GK2	2712	glycerol kinase 2
479	ENTRY00479	PRKCI	5584	protein kinase C, iota
480	ENTRY00480	GRK6	2870	G protein-coupled receptor kinase 6
481	ENTRY00481	TESK1	7016	testis-specific kinase 1
482	ENTRY00482	NUAK2	81788	likely ortholog of rat SNF1/AMP-activated protein kinase
483	ENTRY00483	RAF1	5894	v-raf-1 murine leukemia viral oncogene homolog 1
484	ENTRY00484	PAK6	56924	p21(CDKN1A)-activated kinase 6
485	ENTRY00485	LIMK2	3985	LIM domain kinase 2
486	ENTRY00486	ADRBK1	156	adrenergic, beta, receptor kinase 1
487	ENTRY00487	MAPK6	5597	mitogen-activated protein kinase 6
488	ENTRY00488	DGKA	1606	diacylglycerol kinase, alpha 80kDa
489	ENTRY00489	SNF1LK	150094	SNF1-like kinase
490	ENTRY00490	PIK4CB	5298	phosphatidylinositol 4-kinase, catalytic, beta polypeptide
491	ENTRY00491	EIF2AK4	440275	similar to GCN2 eIF2alpha kinase
492	ENTRY00492	CKS2	1164	CDC28 protein kinase regulatory subunit 2
493	ENTRY00493	RPS6KL1	83694	ribosomal protein S6 kinase-like 1
494	ENTRY00494	CHEK2	11200	CHK2 checkpoint homolog (S. pombe)
495	ENTRY00495	AAK1	22848	AP2 associated kinase 1
496	ENTRY00496	PCTK2	5128	PCTAIRE protein kinase 2
497	ENTRY00497	RIPK2	8767	receptor-interacting serine-threonine kinase 2
498	ENTRY00498	OXSR1	9943	oxidative-stress responsive 1
499	ENTRY00499	PIP5K1B	8395	phosphatidylinositol-4-phosphate 5-kinase, type I, beta
500	ENTRY00500	ULK4	54986	hypothetical protein FLJ20574
501	ENTRY00501	PAK7	57144	p21(CDKN1A)-activated kinase 7
502	ENTRY00502	TBK1	29110	TANK-binding kinase 1
503	ENTRY00503	HIPK1	204851	homeodomain interacting protein kinase 1
504	ENTRY00504	MAP3K6	9064	mitogen-activated protein kinase kinase kinase 6
505	ENTRY00505	HK2	3099	hexokinase 2
506	ENTRY00506	MAST1	22983	microtubule associated serine/threonine kinase 1
507	ENTRY00507	PIK3CG	5294	phosphoinositide-3-kinase, catalytic, gamma polypeptide
508	ENTRY00508	TTK	7272	TTK protein kinase
509	ENTRY00509	BUB1B	701	BUB1 budding uninhibited by benzimidazoles 1 homolog beta (yeast)
510	ENTRY00510	PHKB	5257	phosphorylase kinase, beta
511	ENTRY00511	RPS6KA1	6195	ribosomal protein S6 kinase, 90kDa, polypeptide 1
512	ENTRY00512	TAOK3	51347	TAO kinase 3
513	ENTRY00513	NYD-SP25	89882	protein kinase NYD-SP25
514	ENTRY00514	UCK2	7371	uridine-cytidine kinase 2
515	ENTRY00515	DGUOK	1716	deoxyguanosine kinase
516	ENTRY00516	MAPK14	1432	mitogen-activated protein kinase 14
517	ENTRY00517	CKM	1158	creatine kinase, muscle
518	ENTRY00518	PLK1	5347	polo-like kinase 1 (Drosophila)
519	ENTRY00519	PAPSS1	9061	3'-phosphoadenosine 5'-phosphosulfate synthase 1;PAPSS1
520	ENTRY00520	PFKP	5214	phosphofructokinase, platelet
521	ENTRY00521	DAK	26007	dihydroxyacetone kinase 2 homolog (S. cerevisiae);DAK
522	ENTRY00522	PRKAA1	5562	protein kinase, AMP-activated, alpha 1 catalytic subunit
523	ENTRY00523	GK	2710	glycerol kinase
524	ENTRY00524	ACVRL1	94	activin A receptor type II-like 1
525	ENTRY00525	ERBB3	2065	v-erb-b2 erythroblastic leukemia viral oncogene homolog 3 (avian)
526	ENTRY00526	ERBB4	2066	v-erb-a erythroblastic leukemia viral oncogene homolog 4 (avian)
527	ENTRY00527	FES	2242	feline sarcoma oncogene
528	ENTRY00528	FGR	2268	Gardner-Rasheed feline sarcoma viral (v-fgr) oncogene homolog
529	ENTRY00529	FRK	2444	fyn-related kinase
530	ENTRY00530	HCK	3055	hemopoietic cell kinase
531	ENTRY00531	IGF1R	3480	insulin-like growth factor 1 receptor
532	ENTRY00532	ITK	3702	IL2-inducible T-cell kinase
533	ENTRY00533	MATK	4145	megakaryocyte-associated tyrosine kinase
534	ENTRY00534	NTRK2	4915	neurotrophic tyrosine kinase, receptor, type 2
535	ENTRY00535	PKMYT1	9088	membrane-associated tyrosine- and threonine-specific cdc2-inhibitory kinase
536	ENTRY00536	TEC	7006	tec protein tyrosine kinase
537	ENTRY00537	TXK	7294	TXK tyrosine kinase
538	ENTRY00538	ZAP70	7535	zeta-chain (TCR) associated protein kinase 70kDa
539	ENTRY00539	ERBB2	2064	v-erb-b2 erythroblastic leukemia viral oncogene homolog 2, neuro/glioblastoma derived oncogene homolog (avian)
540	ENTRY00540	MET	4233	met proto-oncogene (hepatocyte growth factor receptor)
541	ENTRY00541	LCK	3932	lymphocyte-specific protein tyrosine kinase
542	ENTRY00542	NTRK1	4914	neurotrophic tyrosine kinase, receptor, type 1
543	ENTRY00543	PDGFRA	5156	platelet-derived growth factor receptor, alpha polypeptide
544	ENTRY00544	PDGFRB	5159	platelet-derived growth factor receptor, beta polypeptide
545	ENTRY00545	TNK1	8711	tyrosine kinase, non-receptor, 1
546	ENTRY00546	FLT3	2322	fms-related tyrosine kinase 3
547	ENTRY00547	EPHB4	2050	EPH receptor B4
548	ENTRY00548	DDR2	4921	discoidin domain receptor family, member 2
549	ENTRY00549	PTK2B	2185	PTK2B protein tyrosine kinase 2 beta
550	ENTRY00550	PTK6	5753	PTK6 protein tyrosine kinase 6
551	ENTRY00551	MERTK	10461	c-mer proto-oncogene tyrosine kinase
552	ENTRY00552	NTRK3	4916	neurotrophic tyrosine kinase, receptor, type 3
553	ENTRY00553	PTK2	5747	PTK2 protein tyrosine kinase 2
554	ENTRY00554	STYK1	55359	protein kinase STYK1
555	ENTRY00555	FGFR2	2263	fibroblast growth factor receptor 2 (bacteria-expressed kinase, keratinocyte growth factor receptor, craniofacial dysostosis 1, Crouzon syndrome, Pfeiffer syndrome, Jackson-Weiss syndrome)
556	ENTRY00556	LYN	4067	v-yes-1 Yamaguchi sarcoma viral related oncogene homolog
557	ENTRY00557	RET	5979	ret proto-oncogene (multiple endocrine neoplasia and medullary thyroid carcinoma 1, Hirschsprung disease)
558	ENTRY00558	SYK	6850	spleen tyrosine kinase
559	ENTRY00559	TYK2	7297	tyrosine kinase 2
560	ENTRY00560	ABL2	27	v-abl Abelson murine leukemia viral oncogene homolog 2 (arg, Abelson-related gene)
561	ENTRY00561	DDR1	780	discoidin domain receptor family, member 1
562	ENTRY00562	EPHA3	2042	EPH receptor A3
563	ENTRY00563	FLT1	2321	fms-related tyrosine kinase 1 (vascular endothelial growth factor/vascular permeability factor receptor)
564	ENTRY00564	MUSK	4593	muscle, skeletal, receptor tyrosine kinase
565	ENTRY00565	LMTK2	22853	lemur tyrosine kinase 2
566	ENTRY00566	JAK2	3717	Janus kinase 2 (a protein tyrosine kinase)
567	ENTRY00567	TYRO3	7301	TYRO3 protein tyrosine kinase
568	ENTRY00568	ALK	238	anaplastic lymphoma kinase (Ki-1)
569	ENTRY00569	BTK	695	Bruton agammaglobulinemia tyrosine kinase
570	ENTRY00570	EPHA4	2043	EPH receptor A4
571	ENTRY00571	EPHA6	285220	EPH receptor A6
572	ENTRY00572	FER	2241	fer (fps/fes related) tyrosine kinase (phosphoprotein NCP94)
573	ENTRY00573	FGFR1	2260	fibroblast growth factor receptor 1 (fms-related tyrosine kinase 2, Pfeiffer syndrome)
574	ENTRY00574	FLT4	2324	fms-related tyrosine kinase 4
575	ENTRY00575	INSRR	3645	insulin receptor-related receptor
576	ENTRY00576	KDR	3791	kinase insert domain receptor (a type III receptor tyrosine kinase)
577	ENTRY00577	EPHA2	1969	EPH receptor A2
578	ENTRY00578	ROR2	4920	receptor tyrosine kinase-like orphan receptor 2
579	ENTRY00579	CSF1R	1436	colony stimulating factor 1 receptor, formerly McDonough feline sarcoma viral (v-fms) oncogene homolog
580	ENTRY00580	EPHA1	2041	EPH receptor A1
581	ENTRY00581	EPHB1	2047	EPH receptor B1
582	ENTRY00582	EPHB6	2051	EPH receptor B6
583	ENTRY00583	JAK1	3716	Janus kinase 1 (a protein tyrosine kinase)
584	ENTRY00584	FGFR3	2261	fibroblast growth factor receptor 3 (achondroplasia, thanatophoric dwarfism)
585	ENTRY00585	SRC	6714	v-src sarcoma (Schmidt-Ruppin A-2) viral oncogene homolog (avian)
586	ENTRY00586	EGFR	1956	epidermal growth factor receptor (erythroblastic leukemia viral (v-erb-b) oncogene homolog, avian)
587	ENTRY00587	BMX	660	BMX non-receptor tyrosine kinase
588	ENTRY00588	FYN	2534	FYN oncogene related to SRC, FGR, YES
589	ENTRY00589	YES1	7525	v-yes-1 Yamaguchi sarcoma viral oncogene homolog 1
590	ENTRY00590	ABL1	25	v-abl Abelson murine leukemia viral oncogene homolog 1
591	ENTRY00591	BLK	640	B lymphoid tyrosine kinase
592	ENTRY00592	CSK	1445	c-src tyrosine kinase
593	ENTRY00593	MST1R	4486	macrophage stimulating 1 receptor (c-met-related tyrosine kinase)
594	ENTRY00594	PTK7	5754	PTK7 protein tyrosine kinase 7
595	ENTRY00595	JAK3	3718	Janus kinase 3 (a protein tyrosine kinase, leukocyte)
596	ENTRY00596	AXL	558	AXL receptor tyrosine kinase
597	ENTRY00597	TIE1	7075	tyrosine kinase with immunoglobulin like and EGF like domains 1
