# Supplementary material for: Yeast-Based Genetic Interaction Analysis of Human Kinome
Source: Cells. 2020 May 7;9(5):1156. doi: 10.3390/cells9051156 (PMC7291280; doi:10.3390/cells9051156)
Supplement: Supplementary file 1 [file cells-09-01156-s001.zip › Supplementary_Table_S2.xlsx]

## Sheet: ABL1
Table S2. Barcode counts of yeast deletion strains obtained from high-throughput sequencing.
Query (Kinase)	Subject (yeast gene deletion)	Normalized barcode counts	Z-score
ABL1	YAL002W	1.1105	0.8275
ABL1	YAL005C	0.132597	-1.44197
ABL1	YAL007C	1.14917	0.744558
ABL1	YAL012W	1.1768	-1.2074
ABL1	YAL015C	1.14917	-0.305874
ABL1	YAL017W	1.1326	0.447326
ABL1	YAL018C	0.950276	0.121531
ABL1	YAL022C	0.845304	-0.196044
ABL1	YAL026C	0.00552486	-0.703991
ABL1	YAL028W	1.85083	0.242074
ABL1	YAL030W	0.640884	-0.484634
ABL1	YAL034C	0.0110497	-1.06037
ABL1	YAL037W	1.02762	0.39351
ABL1	YAL040C	0.441989	0.629363
ABL1	YAL042W	0.0552486	-1.14415
ABL1	YAL043C-	0.519337	0.53311
ABL1	YAL045C	2.1547	2.70368
ABL1	YAL046C	0.00552486	-1.43478
ABL1	YAL049C	0.0276243	-1.06069
ABL1	YAL051W	0.944751	0.0450334
ABL1	YAL053W	1.20442	-0.161447
ABL1	YAL054C	3.8674	1.76402
ABL1	YAL056W	0.0165746	-0.996408
ABL1	YAL058W	0.0276243	-0.923369
ABL1	YAL059W	0.00552486	-0.905757
ABL1	YAL060W	0.0165746	-1.37932
ABL1	YAL061W	1.25414	0.0759017
ABL1	YAL062W	0.0276243	-1.24697
ABL1	YAL065C	0.00552486	-1.33824
ABL1	YAL066W	0.0220994	-1.30862
ABL1	YAL067C	0.745856	-0.460104
ABL1	YAL068C	1.29834	-0.7043
ABL1	YAR003W	1.33149	2.37609
ABL1	YAR014C	1.55249	3.58349
ABL1	YAR020C	1.71271	1.16235
ABL1	YAR023C	0.607735	0.129872
ABL1	YAR027W	1.0442	0.943839
ABL1	YAR028W	0.0331492	-1.06775
ABL1	YAR029W	1.24862	-0.00574148
ABL1	YAR030C	0.0220994	-1.19484
ABL1	YAR031W	0.723757	-0.458178
ABL1	YAR040C	0.00552486	-1.48767
ABL1	YAR042W	0.0110497	-1.92567
ABL1	YAR047C	0.0276243	-1.73737
ABL1	YBL002W	0.0110497	-1.07781
ABL1	YBL003C	0.740331	0.319858
ABL1	YBL005W	0.0552486	-1.1877
ABL1	YBL009W	0.00552486	-1.35612
ABL1	YBL011W	0.464088	-0.787763
ABL1	YBL012C	1.45856	0.794875
ABL1	YBL013W	1.62431	2.05915
ABL1	YBL015W	1.16575	0.0546607
ABL1	YBL019W	0.00552486	-1.34961
ABL1	YBL022C	0.58011	1.3521
ABL1	YBL028C	0.00552486	-1.15745
ABL1	YBL037W	0.00552486	-1.26728
ABL1	YBL042C	1.21547	2.50959
ABL1	YBL045C	1.66298	0.776843
ABL1	YBL049W	3.85635	1.78228
ABL1	YBL053W	2.80663	1.45421
ABL1	YBL054W	0.00552486	-1.53595
ABL1	YBL055C	0.0276243	-1.51787
ABL1	YBL060W	0.81768	0.679465
ABL1	YBL063W	0.0220994	-1.63746
ABL1	YBL066C	1.18232	-0.426885
ABL1	YBL067C	1.1989	0.0710621
ABL1	YBL068W	1	-0.410253
ABL1	YBL069W	0.00552486	-1.10079
ABL1	YBL070C	0.0220994	-1.30605
ABL1	YBL071C	0.585635	1.10863
ABL1	YBL072C	0.0331492	-0.698337
ABL1	YBL075C	0.79558	-0.372988
ABL1	YBL078C	0.00552486	-1.52032
ABL1	YBL081W	0.906077	0.23686
ABL1	YBL083C	0.524862	0.421529
ABL1	YBL085W	3.29282	3.17557
ABL1	YBL086C	1.04972	-0.248338
ABL1	YBL088C	0.00552486	-1.0311
ABL1	YBL089W	3.73481	3.51052
ABL1	YBL091C	1.01657	0.0270804
ABL1	YBL094C	0.00552486	-1.08497
ABL1	YBL095W	2.9337	0.550899
ABL1	YBL096C	0.0165746	-1.57296
ABL1	YBL098W	0.0110497	-1.84733
ABL1	YBL101C	6.96133	-0.405659
ABL1	YBL102W	0.0276243	-2.08082
ABL1	YBL104C	0.933702	0.110515
ABL1	YBL107C	1.96685	-0.0224744
ABL1	YBR001C	1.44751	-0.622414
ABL1	YBR005W	0.98895	-0.295347
ABL1	YBR007C	1.09392	-0.752716
ABL1	YBR008C	2.76796	1.99618
ABL1	YBR012C	0.690608	-0.869655
ABL1	YBR014C	0.917127	-0.295554
ABL1	YBR015C	0.933702	1.40966
ABL1	YBR018C	0.0441989	-1.49404
ABL1	YBR019C	0.00552486	-1.29736
ABL1	YBR020W	2.8232	1.73032
ABL1	YBR022W	0.895028	-0.634559
ABL1	YBR023C	0.79558	0.613135
ABL1	YBR024W	0.0441989	-1.58227
ABL1	YBR032W	1.38122	2.15964
ABL1	YBR033W	1.0442	-0.150225
ABL1	YBR034C	0.0110497	-1.26051
ABL1	YBR040W	0.248619	-0.688497
ABL1	YBR041W	0.309392	-0.22014
ABL1	YBR043C	0.0110497	-1.17481
ABL1	YBR045C	1.1105	-0.773693
ABL1	YBR046C	0.0165746	-1.78436
ABL1	YBR047W	2.67403	1.28553
ABL1	YBR050C	2.45304	-0.911003
ABL1	YBR051W	0.0165746	-1.95629
ABL1	YBR052C	0.861878	-1.09954
ABL1	YBR053C	1.18232	-0.182443
ABL1	YBR054W	1.05525	-0.213288
ABL1	YBR056W	0.00552486	-0.858085
ABL1	YBR057C	0.961326	-0.265877
ABL1	YBR058C	1.22099	-0.0146191
ABL1	YBR059C	0.955801	-1.13715
ABL1	YBR062C	0.0331492	-0.968539
ABL1	YBR063C	1.07182	-0.310795
ABL1	YBR064W	1.12707	-1.13423
ABL1	YBR065C	4.27072	3.31089
ABL1	YBR066C	0.0607735	-1.72684
ABL1	YBR067C	0.0110497	-1.12257
ABL1	YBR068C	4.19337	3.01107
ABL1	YBR069C	0.0441989	-1.10709
ABL1	YBR071W	0.0718232	-1.65756
ABL1	YBR072W	1.76243	0.118011
ABL1	YBR074W	1.96685	-0.380135
ABL1	YBR075W	0.0110497	-1.34513
ABL1	YBR076W	0.116022	2.96871
ABL1	YBR077C	1.71823	2.20698
ABL1	YBR083W	0.530387	-0.791485
ABL1	YBR084W	0.0165746	-1.39219
ABL1	YBR090C-A	0.00552486	-1.29261
ABL1	YBR092C	0.773481	-0.35877
ABL1	YBR093C	0.0331492	-1.29977
ABL1	YBR094W	0.0110497	-1.23303
ABL1	YBR101C	1.64088	1.47005
ABL1	YBR104W	0.00552486	-1.20282
ABL1	YBR105C	0.0165746	-1.52905
ABL1	YBR120C	0.0110497	-1.50406
ABL1	YBR128C	0.00552486	-1.50931
ABL1	YBR129C	0.828729	0.310915
ABL1	YBR130C	0.646409	-0.289596
ABL1	YBR133C	1	0.707107
ABL1	YBR137W	0.790055	-0.542168
ABL1	YBR139W	1.18232	-0.313186
ABL1	YBR144C	0.00552486	-1.08063
ABL1	YBR147W	0.0220994	-1.3833
ABL1	YBR148W	0.0331492	-1.69788
ABL1	YBR150C	0.00552486	-1.32887
ABL1	YBR157C	0.430939	-0.683057
ABL1	YBR159W	0.546961	1.72816
ABL1	YBR161W	0.0276243	-1.12404
ABL1	YBR164C	0.0110497	-1.41034
ABL1	YBR169C	0.0165746	-1.93445
ABL1	YBR170C	0.0276243	-1.2583
ABL1	YBR172C	1.81768	0.889479
ABL1	YBR176W	0.0165746	-1.02678
ABL1	YBR177C	0.00552486	-1.21712
ABL1	YBR180W	0.038674	-1.05164
ABL1	YBR183W	0.0110497	-1.35788
ABL1	YBR184W	0.0165746	-1.70919
ABL1	YBR185C	1.8453	0.211046
ABL1	YBR188C	0.00552486	-1.14108
ABL1	YBR204C	0.00552486	-1.52089
ABL1	YBR205W	1.25967	-0.785304
ABL1	YBR206W	1.21547	-0.582737
ABL1	YBR208C	1.01657	0.0938286
ABL1	YBR212W	0.0331492	-1.17968
ABL1	YBR214W	0.668508	0.00929153
ABL1	YBR215W	0.00552486	-1.06736
ABL1	YBR217W	0.883978	-0.460578
ABL1	YBR218C	0.98895	-0.584006
ABL1	YBR219C	0.00552486	-1.27928
ABL1	YBR220C	0.0165746	-1.77858
ABL1	YBR222C	1.9337	1.58497
ABL1	YBR223C	0.0165746	-1.65974
ABL1	YBR224W	0.0110497	-1.34498
ABL1	YBR225W	0.0110497	-1.50315
ABL1	YBR226C	2.61878	0.647434
ABL1	YBR227C	2.30939	1.069
ABL1	YBR229C	0.839779	-1.43994
ABL1	YBR230C	2.99448	0.133451
ABL1	YBR232C	1.75691	-0.047478
ABL1	YBR238C	0.00552486	-1.62342
ABL1	YBR239C	2.8011	1.71297
ABL1	YBR240C	1.28729	-0.524628
ABL1	YBR241C	0.0110497	-1.66744
ABL1	YBR244W	3.41436	-1.13437
ABL1	YBR246W	1.1768	-0.00621335
ABL1	YBR248C	1.01657	-0.358058
ABL1	YBR249C	3.52486	3.51522
ABL1	YBR250W	4.18232	2.15531
ABL1	YBR258C	1.07735	-0.211668
ABL1	YBR259W	2.14917	0.108941
ABL1	YBR260C	0.0110497	-1.62822
ABL1	YBR261C	0.0220994	-1.48161
ABL1	YBR262C	0.0165746	-1.40769
ABL1	YBR263W	2.87845	1.1908
ABL1	YBR264C	0.0276243	-1.45708
ABL1	YCL001W	0.596685	0.017092
ABL1	YCL006C	1.53591	-1.55479
ABL1	YCL008C	0.00552486	-0.959174
ABL1	YCL009C	2.28729	3.31852
ABL1	YCL012W	0.00552486	-1.30166
ABL1	YCL022C	0.0276243	-0.984389
ABL1	YCL023C	2.57459	-1.1376
ABL1	YCL024W	0.0110497	-1.36591
ABL1	YCL026C	1.02762	0.38483
ABL1	YCL027W	0.0110497	-1.4546
ABL1	YCL035C	0.00552486	-1.01678
ABL1	YCL036W	0.18232	-0.40654
ABL1	YCL037C	0.00552486	-0.938382
ABL1	YCL038C	0.0276243	-1.5074
ABL1	YCL039W	3.09392	3.82154
ABL1	YCL044C	0.856354	1.31444
ABL1	YCL046W	0.0220994	-1.34535
ABL1	YCL048W	2.66851	3.86327
ABL1	YCL051W	0.00552486	-1.2384
ABL1	YCL055W	0.00552486	-0.966589
ABL1	YCL062W	2.66298	2.22124
ABL1	YCL074W	3.1326	0.407675
ABL1	YCL075W	1.43094	-1.48878
ABL1	YCL076W	3.46409	0.189658
ABL1	YCR001W	3.05525	4.01052
ABL1	YCR005C	0.00552486	-1.1683
ABL1	YCR006C	0.0441989	-1.2082
ABL1	YCR008W	0.00552486	-0.998548
ABL1	YCR010C	0.933702	0.246398
ABL1	YCR014C	0.00552486	-0.745204
ABL1	YCR017C	1.22099	2.22136
ABL1	YCR018C	0.0165746	-1.9672
ABL1	YCR019W	0.98895	-0.32725
ABL1	YCR020C	0.839779	1.35928
ABL1	YCR021C	0.0331492	-1.50357
ABL1	YCR022C	1.43646	1.61356
ABL1	YCR023C	0.00552486	-1.30158
ABL1	YDL009C	1.26519	0.977059
ABL1	YDL010W	0.00552486	-0.653135
ABL1	YDL012C	1.30387	0.294461
ABL1	YDL018C	1.1326	0.582807
ABL1	YDL019C	0.00552486	-1.03357
ABL1	YDL024C	0.0441989	-0.89327
ABL1	YDL027C	0.0110497	-1.10352
ABL1	YDL034W	2.97238	2.27368
ABL1	YDL035C	0.640884	-0.176657
ABL1	YDL036C	0.0662983	-1.23602
ABL1	YDL038C	1.07735	1.08114
ABL1	YDL039C	3.69061	1.98769
ABL1	YDL041W	0.0110497	-0.899974
ABL1	YDL046W	0.0441989	-0.806949
ABL1	YDL049C	0.00552486	-1.1312
ABL1	YDL050C	0.00552486	-0.56905
ABL1	YDL052C	3.57459	3.89828
ABL1	YDL053C	0.0110497	-1.1657
ABL1	YDL054C	0.00552486	-0.813272
ABL1	YDL065C	0.00552486	-0.773577
ABL1	YDL069C	0.0220994	-1.29992
ABL1	YDL070W	0.00552486	-1.36786
ABL1	YDL072C	0.0110497	-1.27835
ABL1	YDL078C	0.0497238	-1.17437
ABL1	YDL086W	0.00552486	-1.18355
ABL1	YDL088C	0.00552486	-1.29
ABL1	YDL089W	0.0220994	-0.941486
ABL1	YDL091C	3.31492	3.58823
ABL1	YDL094C	0.0331492	-0.971854
ABL1	YDL095W	0.823204	1.44692
ABL1	YDL096C	0.972376	0.470343
ABL1	YDL099W	0.701657	0.449472
ABL1	YDL104C	0.0276243	-0.715021
ABL1	YDL106C	0.00552486	-0.647023
ABL1	YDL109C	1.14365	-0.964575
ABL1	YDL112W	4.65746	2.41367
ABL1	YDL113C	4.18232	1.36498
ABL1	YDL114W	2.12155	0.0429563
ABL1	YDL118W	1.1989	0.179652
ABL1	YDL121C	1.98895	0.214942
ABL1	YDL122W	0.834254	-0.249254
ABL1	YDL123W	0.41989	-0.953394
ABL1	YDL124W	0.0165746	-1.69992
ABL1	YDL125C	0.469613	-0.250717
ABL1	YDL127W	2.06077	3.57886
ABL1	YDL129W	0.729282	-0.981323
ABL1	YDL131W	0.038674	-1.00858
ABL1	YDL133W	2.09392	1.79492
ABL1	YDL134C	0.928177	-0.314723
ABL1	YDL134C-A	0.0441989	-1.71506
ABL1	YDL135C	0.0607735	-1.31829
ABL1	YDL137W	0.0110497	-2.22291
ABL1	YDL138W	1.35359	-1.67537
ABL1	YDL142C	2.77348	-0.654571
ABL1	YDL146W	1.63536	0.254286
ABL1	YDL149W	0.0220994	-2.01521
ABL1	YDL154W	7.16575	-0.259862
ABL1	YDL155W	5.54144	0.314208
ABL1	YDL156W	0.574586	-2.64625
ABL1	YDL157C	0.00552486	-1.93084
ABL1	YDL160C	0.00552486	-0.957666
ABL1	YDL161W	1.78453	-1.33772
ABL1	YDL167C	1.49724	-1.13967
ABL1	YDL168W	2.79006	-0.505088
ABL1	YDL169C	0.59116	-1.42841
ABL1	YDL170W	4.0663	-0.185233
ABL1	YDL171C	1.12707	-1.87808
ABL1	YDL173W	2.9779	3.591
ABL1	YDL174C	4.07182	-0.737135
ABL1	YDL176W	4.32044	-1.23213
ABL1	YDL177C	1.32597	-2.13846
ABL1	YDL178W	1.92265	-1.1684
ABL1	YDL179W	0.61326	-2.28454
ABL1	YDL180W	1.16575	-2.14302
ABL1	YDL182W	0.729282	-1.95549
ABL1	YDL183C	2.0442	0.767157
ABL1	YDL184C	1.30387	-1.92257
ABL1	YDL186W	2.43094	-0.915424
ABL1	YDL187C	6.40331	1.01078
ABL1	YDL188C	1.9558	-0.345263
ABL1	YDL189W	5.54144	0.822389
ABL1	YDL190C	0.0331492	-1.36066
ABL1	YDL197C	0.0276243	-1.63632
ABL1	YDL199C	2.90055	0.433553
ABL1	YDL201W	1.57459	-0.322169
ABL1	YDL203C	2.76796	-0.212951
ABL1	YDL204W	0.0276243	-1.90821
ABL1	YDL206W	0.0220994	-2.0011
ABL1	YDL210W	2.81768	0.294029
ABL1	YDL211C	0.0552486	-1.80028
ABL1	YDL213C	0.00552486	-0.927309
ABL1	YDL215C	0.0110497	-2.06759
ABL1	YDL218W	1.1326	-1.09861
ABL1	YDL219W	0.0276243	-1.84443
ABL1	YDL222C	2.20442	-1.54384
ABL1	YDL223C	2.1989	0.519155
ABL1	YDL224C	0.0441989	-1.65762
ABL1	YDL225W	0.00552486	-1.60803
ABL1	YDL227C	3.0884	-0.741832
ABL1	YDL229W	0.00552486	-1.41616
ABL1	YDL230W	0.0220994	-1.93332
ABL1	YDL231C	0.0718232	-2.25637
ABL1	YDL233W	5.67403	1.08445
ABL1	YDL236W	0.0165746	-1.41532
ABL1	YDL237W	0.248619	-1.27964
ABL1	YDL238C	1.38122	0.0941016
ABL1	YDL239C	2.53039	0.867416
ABL1	YDL240W	0.40884	-1.4643
ABL1	YDL241W	2.1989	1.05842
ABL1	YDL242W	2.40884	-0.398283
ABL1	YDL243C	0.0110497	-2.15666
ABL1	YDR001C	0.0165746	-1.67902
ABL1	YDR003W	2.18785	0.861885
ABL1	YDR006C	0.640884	-1.62927
ABL1	YDR007W	0.530387	1.07546
ABL1	YDR009W	2.20442	-0.61126
ABL1	YDR010C	0.662983	-1.50754
ABL1	YDR011W	0.0110497	-1.62292
ABL1	YDR015C	0.883978	-0.589108
ABL1	YDR018C	1.16022	-1.04797
ABL1	YDR019C	1.0442	-1.32168
ABL1	YDR020C	0.359116	0.0079733
ABL1	YDR022C	1.97238	-0.929582
ABL1	YDR026C	0.226519	-2.16397
ABL1	YDR028C	4.86188	1.70452
ABL1	YDR029W	1.09392	-1.37974
ABL1	YDR030C	1	-1.38992
ABL1	YDR031W	0.0220994	-1.94368
ABL1	YDR032C	3.68508	2.37631
ABL1	YDR033W	0.0331492	-2.31261
ABL1	YDR034C	0.232044	-0.794713
ABL1	YDR035W	1.0663	-1.45063
ABL1	YDR036C	0.0607735	-1.57009
ABL1	YDR042C	3.82873	1.10882
ABL1	YDR043C	0.0276243	-1.86741
ABL1	YDR046C	1.54144	-1.05428
ABL1	YDR048C	1.57459	1.95192
ABL1	YDR051C	1.36464	1.37358
ABL1	YDR055W	0.00552486	-1.39942
ABL1	YDR056C	0.60221	-0.820413
ABL1	YDR057W	0.00552486	-1.20968
ABL1	YDR059C	1.19337	-0.41342
ABL1	YDR061W	0.79558	-0.716767
ABL1	YDR063W	1.43094	0.173266
ABL1	YDR067C	9.23204	1.63154
ABL1	YDR068W	2.69613	0.704126
ABL1	YDR070C	0.983425	-0.134449
ABL1	YDR073W	0.40884	-1.4026
ABL1	YDR077W	1.09392	0.0032811
ABL1	YDR078C	0.657459	-0.196251
ABL1	YDR084C	0.629834	-0.344775
ABL1	YDR085C	0.0331492	-1.3763
ABL1	YDR087C	0.0165746	-0.709254
ABL1	YDR089W	1.22652	-1.3921
ABL1	YDR090C	1.03867	-0.902761
ABL1	YDR094W	5.33149	3.55949
ABL1	YDR095C	3.54696	1.66591
ABL1	YDR096W	0.0497238	-1.37622
ABL1	YDR097C	1.20994	-0.484165
ABL1	YDR098C	0.900552	-0.206734
ABL1	YDR099W	0.0552486	-1.53432
ABL1	YDR100W	0.0110497	-1.30272
ABL1	YDR104C	1.04972	-0.21169
ABL1	YDR107C	1.0221	-0.606218
ABL1	YDR108W	0.0110497	-1.37959
ABL1	YDR111C	0.00552486	-1.41132
ABL1	YDR112W	0.00552486	-1.34543
ABL1	YDR117C	1	0.21964
ABL1	YDR119W	1.67956	-0.484425
ABL1	YDR120C	0.0110497	-0.782321
ABL1	YDR122W	2.22652	-0.0658078
ABL1	YDR123C	5.1547	1.64324
ABL1	YDR126W	0.00552486	-0.499229
ABL1	YDR128W	1.0442	-0.243088
ABL1	YDR131C	0.00552486	-1.46427
ABL1	YDR133C	1.0884	-0.674325
ABL1	YDR134C	1.22652	-1.0687
ABL1	YDR135C	0.0497238	-1.63804
ABL1	YDR139C	3.13812	2.77992
ABL1	YDR143C	0.0165746	-2.08369
ABL1	YDR144C	0.00552486	-1.08291
ABL1	YDR146C	0.0110497	-1.17636
ABL1	YDR148C	0.734807	-0.147941
ABL1	YDR152W	0.00552486	-1.17292
ABL1	YDR153C	5.23757	1.24637
ABL1	YDR157W	1.93923	1.68514
ABL1	YDR162C	1.13812	0.748151
ABL1	YDR163W	0.00552486	-1.04136
ABL1	YDR169C	1.76796	0.919663
ABL1	YDR171W	0.0276243	-1.78942
ABL1	YDR178W	0.00552486	-1.39982
ABL1	YDR179W-A	0.0883978	-0.283968
ABL1	YDR181C	0.0220994	-1.19961
ABL1	YDR185C	1.0884	0.405921
ABL1	YDR186C	0.038674	-0.732312
ABL1	YDR191W	3.66851	2.33568
ABL1	YDR192C	0.0441989	-1.34838
ABL1	YDR193W	0.00552486	-1.01781
ABL1	YDR198C	0.823204	0.32301
ABL1	YDR202C	1.75138	2.05455
ABL1	YDR203W	0.00552486	-0.868434
ABL1	YDR205W	4.41436	2.29433
ABL1	YDR206W	0.0331492	-1.37412
ABL1	YDR214W	1.51934	0.347654
ABL1	YDR215C	0.342541	-0.0648142
ABL1	YDR216W	0.0331492	-1.42893
ABL1	YDR218C	0.00552486	-1.0813
ABL1	YDR219C	0.0441989	-1.03294
ABL1	YDR223W	2.46961	1.58576
ABL1	YDR225W	0.00552486	-0.667892
ABL1	YDR229W	0.00552486	-1.6122
ABL1	YDR230W	0.00552486	-1.3171
ABL1	YDR231C	0.038674	-0.658048
ABL1	YDR233C	2.42541	0.907386
ABL1	YDR239C	0.0110497	-1.72186
ABL1	YDR244W	0.00552486	-1.18752
ABL1	YDR247W	0.955801	0.0763208
ABL1	YDR248C	0.0441989	-1.13701
ABL1	YDR251W	0.00552486	-0.825727
ABL1	YDR252W	0.038674	-1.42096
ABL1	YDR256C	0.0110497	-1.37983
ABL1	YDR257C	1.62983	1.42035
ABL1	YDR258C	2.58011	2.11248
ABL1	YDR261C	0.00552486	-1.34071
ABL1	YDR262W	0.0110497	-1.03741
ABL1	YDR263C	3.9558	3.32424
ABL1	YDR265W	0.513812	-0.0386592
ABL1	YDR268W	1.1768	1.52272
ABL1	YDR269C	1.76243	-0.0147318
ABL1	YDR272W	2.28729	2.25324
ABL1	YDR273W	0.0441989	-1.34999
ABL1	YDR274C	1.20994	3.694
ABL1	YDR275W	1.39779	1.49974
ABL1	YDR277C	0.0220994	-1.00557
ABL1	YDR282C	0.430939	0.447891
ABL1	YDR286C	0.00552486	-1.38987
ABL1	YDR290W	1.65193	-0.168951
ABL1	YDR297W	0.756906	-0.900193
ABL1	YDR304C	0.038674	-1.03824
ABL1	YDR306C	0.00552486	-1.07066
ABL1	YDR307W	0.0497238	-1.22114
ABL1	YDR309C	0.0497238	-1.28352
ABL1	YDR310C	0.635359	0.718381
ABL1	YDR312W	0.0276243	-1.23819
ABL1	YDR313C	0.00552486	-1.44604
ABL1	YDR314C	0.0165746	-1.37155
ABL1	YDR316W	1.1105	1.79252
ABL1	YDR317W	0.00552486	-0.724556
ABL1	YDR326C	0.878453	-0.368789
ABL1	YDR330W	3.96685	4.36335
ABL1	YEL001C	0.0165746	-1.41576
ABL1	YEL004W	1.47514	0.237668
ABL1	YEL005C	0.0276243	-1.09617
ABL1	YEL006W	0.0276243	-1.1747
ABL1	YEL009C	0.0331492	-0.484262
ABL1	YEL010W	0.0165746	-0.941628
ABL1	YEL011W	0.0165746	-2.04063
ABL1	YEL012W	0.00552486	-1.7508
ABL1	YEL015W	0.0220994	-1.19938
ABL1	YEL016C	0.00552486	-1.41889
ABL1	YEL017C-A	0.939227	0.226576
ABL1	YEL017W	0.0110497	-0.819289
ABL1	YEL018W	0.0220994	-1.21894
ABL1	YEL023C	0.0276243	-1.24147
ABL1	YEL025C	0.0110497	-1.43895
ABL1	YEL028W	0.00552486	-1.71203
ABL1	YEL038W	0.0331492	-1.08158
ABL1	YEL039C	0.00552486	-1.36917
ABL1	YEL040W	0.00552486	-1.47035
ABL1	YEL041W	1.35359	-0.696117
ABL1	YEL042W	0.0165746	-1.29675
ABL1	YEL047C	2.18232	-0.354622
ABL1	YEL048C	0.0165746	-1.68837
ABL1	YEL049W	0.0165746	-1.36323
ABL1	YEL052W	1.62983	-0.301677
ABL1	YEL053C	1.22099	0.0119838
ABL1	YEL056W	2.34807	1.07037
ABL1	YEL059W	0.0110497	-1.52799
ABL1	YEL060C	0.00552486	-1.04218
ABL1	YEL062W	0.0110497	-1.33993
ABL1	YEL063C	4.65746	3.11832
ABL1	YEL064C	0.0165746	-0.640926
ABL1	YEL065W	2.83425	1.59137
ABL1	YEL066W	0.00552486	-1.33554
ABL1	YEL067C	3.71271	0.899171
ABL1	YEL068C	4.38674	1.45248
ABL1	YEL071W	2.24862	0.343765
ABL1	YER001W	0.0110497	-1.8766
ABL1	YER004W	2.46961	3.82432
ABL1	YER007W	3.16575	2.3677
ABL1	YER011W	0.0828729	-1.42863
ABL1	YER020W	5.33149	3.15168
ABL1	YER024W	0.939227	-0.581545
ABL1	YER028C	1.62983	0.188182
ABL1	YER030W	0.0773481	-1.49025
ABL1	YER031C	0.0276243	-1.37113
ABL1	YER042W	2.32597	2.26049
ABL1	YER044C-A	1.70166	-0.246346
ABL1	YER045C	0.917127	-0.639548
ABL1	YER046W	0.966851	-1.62502
ABL1	YER046W-A	0.928177	1.22819
ABL1	YER048C	0.0441989	-1.00622
ABL1	YER049W	0.143646	-1.22642
ABL1	YER051W	0.480663	0.898174
ABL1	YER053C	0.0110497	-1.14486
ABL1	YER055C	2.19337	0.626525
ABL1	YER056C	0.0718232	-1.2022
ABL1	YER057C	1.24309	-0.447961
ABL1	YER058W	0.0165746	-0.926462
ABL1	YER059W	0.640884	-1.26012
ABL1	YER060W	3.76243	1.45027
ABL1	YER060W-A	0.0441989	-1.34195
ABL1	YER062C	0.80663	0.0657732
ABL1	YER063W	0.038674	-2.44295
ABL1	YER064C	1.19337	-0.610206
ABL1	YER065C	0.00552486	-1.5829
ABL1	YER066C-A	0.00552486	-0.870101
ABL1	YER066W	1.65746	-0.0562138
ABL1	YER067C-A	0.0110497	-1.6049
ABL1	YER067W	0.0220994	-1.10704
ABL1	YER071C	1.14917	-0.251675
ABL1	YER072W	0.0110497	-1.02343
ABL1	YER075C	0.00552486	-1.53155
ABL1	YER081W	0.0110497	-1.26186
ABL1	YER084W	0.0276243	-1.02753
ABL1	YER085C	0.00552486	-1.35359
ABL1	YER087C-A	0.0165746	-1.29566
ABL1	YER088C	0.729282	-0.0917067
ABL1	YER089C	0.546961	-0.660197
ABL1	YER092W	0.00552486	-0.667768
ABL1	YER093C-A	2.07182	0.479286
ABL1	YER096W	1.74033	-0.201331
ABL1	YER097W	0.00552486	-1.17954
ABL1	YER098W	0.0110497	-1.83301
ABL1	YER103W	0.977901	0.417585
ABL1	YER106W	3.54144	2.31814
ABL1	YER114C	0.662983	0.206316
ABL1	YER115C	1.18785	-0.00209484
ABL1	YER118C	1.06077	0.98409
ABL1	YER120W	0.779006	1.39357
ABL1	YER121W	0.00552486	-1.48891
ABL1	YER123W	1.29282	0.958036
ABL1	YER124C	4.38674	3.315
ABL1	YER129W	2.29282	2.37033
ABL1	YER134C	0.00552486	-1.60978
ABL1	YER138C-A	0.950276	0.802936
ABL1	YER140W	2.70166	1.2221
ABL1	YER141W	0.0276243	-1.45477
ABL1	YER146W	0.0110497	-1.00523
ABL1	YER153C	0.00552486	-1.27686
ABL1	YER156C	0.0165746	-0.929372
ABL1	YER157W	0.0165746	-1.37363
ABL1	YER158C	0.0110497	-1.17214
ABL1	YER160C	0.0441989	-2.07064
ABL1	YER163C	0.0497238	-1.15453
ABL1	YER165C-A	0.0220994	-0.945838
ABL1	YER167W	0.0110497	-1.40183
ABL1	YER172C-A	0.00552486	-1.12799
ABL1	YER173W	0.0497238	-0.428671
ABL1	YER174C	0.911602	-0.15083
ABL1	YER175C	1.1547	0.218699
ABL1	YER177W	0.751381	-0.0761411
ABL1	YER178W	0.0276243	-1.37571
ABL1	YER185W	0.718232	-0.813421
ABL1	YER187W	0.00552486	-1.31753
ABL1	YHL002W	1.43646	-1.79253
ABL1	YHL003C	0.0165746	-1.50928
ABL1	YHL006C	0.0331492	-0.865577
ABL1	YHL008C	4.20994	3.37723
ABL1	YHL012W	1.9116	2.79411
ABL1	YHL014C	0.00552486	-1.86289
ABL1	YHL016C	0.00552486	-0.92972
ABL1	YHL017W	0.00552486	-0.871407
ABL1	YHL019C	2.33702	3.05404
ABL1	YHL022C	2.39779	2.87192
ABL1	YHL023C	1.58564	0.463069
ABL1	YHL024W	1.9558	0.8816
ABL1	YHL026C	0.0331492	-1.71015
ABL1	YHL027W	0.21547	-1.03807
ABL1	YHL028W	0.0220994	-1.18712
ABL1	YHL029C	6.02762	1.61629
ABL1	YHL034C	0.0165746	-1.68832
ABL1	YHL037C	0.00552486	-1.19172
ABL1	YHL039W	0.00552486	-2.02278
ABL1	YHL040C	0.00552486	-1.58564
ABL1	YHL041W	0.0773481	-1.12318
ABL1	YHL042W	2.45304	0.279756
ABL1	YHL046C	1.0442	1.33963
ABL1	YHL047C	0.464088	-0.918355
ABL1	YHR001W-A	0.0331492	-1.74842
ABL1	YHR003C	0.895028	-1.37004
ABL1	YHR006W	5.24309	1.41459
ABL1	YHR009C	0.0110497	-1.58694
ABL1	YHR015W	0.0497238	-1.43723
ABL1	YHR016C	0.0165746	-1.67377
ABL1	YHR017W	0.00552486	-0.84336
ABL1	YHR022C	0.491713	-1.05552
ABL1	YHR028C	3.49724	1.19255
ABL1	YHR033W	0.801105	-1.32614
ABL1	YHR035W	2.29834	-0.0430047
ABL1	YHR037W	0.00552486	-1.64443
ABL1	YHR043C	0.00552486	-1.44555
ABL1	YHR044C	2.22652	2.05731
ABL1	YHR045W	0.486188	-1.1897
ABL1	YHR046C	0.364641	0.909246
ABL1	YHR047C	1.39779	0.816866
ABL1	YHR049C-A	0.0110497	-1.54716
ABL1	YHR049W	0.00552486	-1.58261
ABL1	YHR073W	0.0110497	-1.38379
ABL1	YHR077C	0.00552486	-1.37825
ABL1	YHR078W	0.00552486	-1.09864
ABL1	YHR079C	0.0331492	-1.20019
ABL1	YHR082C	0.491713	-0.66451
ABL1	YHR086W	0.121547	-1.48548
ABL1	YHR092C	0.00552486	-1.43045
ABL1	YHR093W	0.0220994	-1.51176
ABL1	YHR094C	0.314917	-0.989487
ABL1	YHR097C	0.0110497	-1.52023
ABL1	YHR103W	0.00552486	-0.829051
ABL1	YHR104W	0.00552486	-1.29377
ABL1	YHR105W	1.18785	0.953846
ABL1	YHR108W	0.00552486	-0.978688
ABL1	YHR109W	0.00552486	-1.61412
ABL1	YHR117W	0.0276243	-1.31217
ABL1	YHR121W	0.662983	-1.0949
ABL1	YHR123W	0.0110497	-1.07647
ABL1	YHR124W	0.59116	-0.455238
ABL1	YHR127W	0.475138	-1.60142
ABL1	YHR131C	0.00552486	-1.41575
ABL1	YHR135C	2.1768	3.492
ABL1	YHR136C	0.00552486	-1.10785
ABL1	YHR137W	0.00552486	-1.2135
ABL1	YHR138C	1.16022	-0.623331
ABL1	YHR139C	0.0276243	-1.40793
ABL1	YHR142W	0.038674	-0.968646
ABL1	YHR143W	0.0110497	-1.29195
ABL1	YHR146W	1.02762	-0.2519
ABL1	YHR150W	0.679558	0.0835897
ABL1	YHR151C	1.83978	2.7889
ABL1	YHR152W	0.0110497	-1.38723
ABL1	YHR153C	1.58564	1.92309
ABL1	YHR155W	0.0662983	-1.20675
ABL1	YHR156C	1.53591	1.85178
ABL1	YHR157W	0.21547	-0.726539
ABL1	YHR158C	0.00552486	-1.54465
ABL1	YHR159W	1.38122	1.33524
ABL1	YHR161C	0.81768	-0.279618
ABL1	YHR162W	0.828729	-0.204459
ABL1	YHR167W	0.0110497	-0.740926
ABL1	YHR171W	0.00552486	-1.47285
ABL1	YHR176W	1.18232	3.56959
ABL1	YHR177W	0.00552486	-1.63325
ABL1	YHR179W	0.651934	0.124128
ABL1	YHR180W	0.845304	-1.24656
ABL1	YHR181W	0.0276243	-1.24888
ABL1	YHR182W	0.0607735	-1.2152
ABL1	YHR185C	0.0331492	-2.28825
ABL1	YHR189W	0.00552486	-1.43287
ABL1	YHR193C	0.00552486	-1.1802
ABL1	YHR195W	0.00552486	-1.0697
ABL1	YHR198C	2.72928	2.40206
ABL1	YHR199C	0.624309	-0.235353
ABL1	YHR204W	0.80663	0.440594
ABL1	YHR206W	0.0331492	-1.05435
ABL1	YHR207C	0.972376	0.741304
ABL1	YHR209W	0.00552486	-1.39715
ABL1	YHR210C	0.878453	0.488018
ABL1	YIL001W	0.0276243	-1.00368
ABL1	YIL006W	0.767956	-1.52174
ABL1	YIL007C	1.46961	-0.379095
ABL1	YIL009W	10.6575	3.13984
ABL1	YIL010W	0.767956	-2.1942
ABL1	YIL011W	0.0441989	-1.07185
ABL1	YIL012W	0.00552486	-1.15905
ABL1	YIL013C	1.25967	0.0593944
ABL1	YIL024C	1.20994	1.99473
ABL1	YIL027C	0.00552486	-0.633828
ABL1	YIL028W	0.0276243	-0.973851
ABL1	YIL032C	0.0276243	-0.983892
ABL1	YIL037C	0.00552486	-0.375771
ABL1	YIL038C	4.45304	-0.54732
ABL1	YIL041W	0.0220994	-1.02757
ABL1	YIL042C	0.00552486	-1.23302
ABL1	YIL044C	0.00552486	-0.624437
ABL1	YIL045W	0.0110497	-1.33415
ABL1	YIL052C	0.751381	-0.335825
ABL1	YIL054W	1.32597	0.089216
ABL1	YIL055C	1.07735	-0.8352
ABL1	YIL056W	3.16022	-0.648303
ABL1	YIL057C	0.337017	-0.106554
ABL1	YIL059C	0.0110497	-1.95039
ABL1	YIL064W	2.92265	2.85435
ABL1	YIL065C	0.00552486	-0.8317
ABL1	YIL066C	1.12707	-1.1187
ABL1	YIL069C	0.950276	1.03874
ABL1	YIL070C	0.0552486	-1.50139
ABL1	YIL071C	0.917127	-1.51685
ABL1	YIL072W	0.00552486	-1.09693
ABL1	YIL073C	2.39227	0.555998
ABL1	YIL074C	0.00552486	-2.28248
ABL1	YIL076W	0.955801	-0.0169299
ABL1	YIL077C	0.00552486	-0.981994
ABL1	YIL084C	0.00552486	-1.28814
ABL1	YIL085C	0.701657	-1.34011
ABL1	YIL086C	0.00552486	-1.81831
ABL1	YIL088C	0.0276243	-1.39973
ABL1	YIL089W	1.21547	-1.6358
ABL1	YIL092W	0.0110497	-2.19827
ABL1	YIL095W	2.21547	2.2462
ABL1	YIL096C	0.0276243	-1.3028
ABL1	YIL099W	2.21547	0.377852
ABL1	YIL100W	0.41989	2.17003
ABL1	YIL105C	1.03867	0.0157986
ABL1	YIL108W	0.0165746	-1.6974
ABL1	YIL110W	0.0165746	-0.777627
ABL1	YIL114C	2.0663	0.0695446
ABL1	YIL117C	1.1547	-0.282025
ABL1	YIL120W	2.62983	-1.40466
ABL1	YIL121W	0.359116	-0.517391
ABL1	YIL123W	0.0220994	-0.495188
ABL1	YIL124W	0.038674	-1.46199
ABL1	YIL125W	0.0110497	-0.960337
ABL1	YIL130W	2.8895	1.14154
ABL1	YIL131C	1.19337	-0.0818865
ABL1	YIL132C	0.701657	-1.0661
ABL1	YIL135C	6.28729	2.97079
ABL1	YIL137C	1.20442	-0.801688
ABL1	YIL140W	4.08287	1.76782
ABL1	YIL141W	0.00552486	-1.9497
ABL1	YIL145C	1.99448	0.18687
ABL1	YIL146C	0.0883978	-1.63149
ABL1	YIL152W	0.0165746	-2.1963
ABL1	YIL155C	0.0110497	-1.48796
ABL1	YIL156W	0.0220994	-2.19121
ABL1	YIL159W	0.546961	-0.908865
ABL1	YIL160C	1.83425	0.699395
ABL1	YIL161W	2.16022	0.93383
ABL1	YIL162W	0.861878	-1.53069
ABL1	YIL163C	2.20442	0.146468
ABL1	YIL164C	1.79558	0.218614
ABL1	YIL165C	0.0441989	-1.92718
ABL1	YIL166C	0.00552486	-1.19629
ABL1	YIL167W	1.34807	-0.366992
ABL1	YIL168W	0.845304	-1.22716
ABL1	YIL170W	0.00552486	-2.03666
ABL1	YIL173W	2.23757	-0.493291
ABL1	YIR001C	1.28729	-0.7982
ABL1	YIR002C	0.00552486	-1.68365
ABL1	YIR003W	2.67956	-0.146951
ABL1	YIR007W	0.0552486	-2.39263
ABL1	YIR013C	0.0331492	-2.05858
ABL1	YIR014W	2.21547	-0.989561
ABL1	YIR016W	4.62983	0.165526
ABL1	YJL012C	1.03315	0.657172
ABL1	YJL013C	0.558011	-1.06967
ABL1	YJL016W	1.10497	-1.29546
ABL1	YJL017W	1.07735	-0.18102
ABL1	YJL020C	0.0110497	-1.27311
ABL1	YJL021C	0.0441989	-1.26739
ABL1	YJL022W	0.00552486	-1.29264
ABL1	YJL024C	0.00552486	-1.1413
ABL1	YJL027C	2.51934	0.408007
ABL1	YJL030W	1.08287	-0.547528
ABL1	YJL036W	0.0607735	-1.42682
ABL1	YJL037W	6.73481	1.18497
ABL1	YJL038C	0.00552486	-1.82705
ABL1	YJL042W	3.62983	0.150917
ABL1	YJL043W	0.00552486	-1.58821
ABL1	YJL044C	1.58564	-0.356498
ABL1	YJL045W	2.89503	0.201753
ABL1	YJL048C	0.0331492	-2.33368
ABL1	YJL049W	1.34807	-1.34476
ABL1	YJL051W	0.983425	-2.05282
ABL1	YJL052W	0.0110497	-1.09011
ABL1	YJL055W	0.972376	-1.14973
ABL1	YJL057C	1.9337	0.285527
ABL1	YJL058C	0.0331492	-2.30667
ABL1	YJL060W	3.48066	0.166712
ABL1	YJL064W	1.22652	-1.1453
ABL1	YJL065C	0.00552486	-2.20804
ABL1	YJL066C	0.0165746	-1.66764
ABL1	YJL067W	0.0110497	-1.3565
ABL1	YJL068C	0.00552486	-1.97534
ABL1	YJL070C	0.298343	-1.79787
ABL1	YJL071W	0.0110497	-1.63281
ABL1	YJL073W	0.779006	-1.08987
ABL1	YJL077C	3.29834	-0.26491
ABL1	YJL079C	0.0220994	-1.48445
ABL1	YJL082W	1.0663	-0.639207
ABL1	YJL083W	1.1105	-1.68297
ABL1	YJL084C	2.07182	-0.638268
ABL1	YJL089W	0.668508	-1.32957
ABL1	YJL093C	0.0939227	-1.83354
ABL1	YJL094C	0.0220994	-1.81523
ABL1	YJL095W	0.856354	0.243442
ABL1	YJL098W	0.00552486	-2.02929
ABL1	YJL099W	0.98895	-0.423726
ABL1	YJL100W	1.10497	-1.50776
ABL1	YJL101C	0.0110497	-1.52343
ABL1	YJL103C	0.61326	-0.738239
ABL1	YJL105W	0.00552486	-1.51449
ABL1	YJL106W	1.40331	-1.61313
ABL1	YJL107C	1.43646	-0.812974
ABL1	YJL108C	2.45856	0.94222
ABL1	YJL110C	0.00552486	-1.66141
ABL1	YJL112W	0.900552	-1.07555
ABL1	YJL116C	1.06077	-1.32932
ABL1	YJL118W	0.0662983	-1.2988
ABL1	YJL119C	1.25967	-1.58654
ABL1	YJL121C	0.0110497	-0.89131
ABL1	YJL122W	0.867403	-1.64969
ABL1	YJL123C	1.05525	-0.779675
ABL1	YJL124C	1.10497	0.465245
ABL1	YJL126W	3.51381	1.47686
ABL1	YJL130C	2.55801	2.7401
ABL1	YJL132W	1.14365	-0.816026
ABL1	YJL133W	1.54696	0.634507
ABL1	YJL134W	4.04972	0.0444783
ABL1	YJL135W	2.33702	-0.24772
ABL1	YJL141C	1.27072	2.02115
ABL1	YJL142C	2.77901	0.951126
ABL1	YJL144W	0.0441989	-0.977263
ABL1	YJL145W	0.569061	-0.549408
ABL1	YJL146W	1.26519	1.3139
ABL1	YJL147C	1.65193	1.01814
ABL1	YJL148W	0.0276243	-1.05925
ABL1	YJL157C	0.530387	-0.478631
ABL1	YJL158C	1.18232	0.290165
ABL1	YJL169W	0.740331	0.115883
ABL1	YJL170C	1.61326	0.820496
ABL1	YJL171C	0.0220994	-1.39819
ABL1	YJL177W	0.0110497	-0.873957
ABL1	YJL181W	0.00552486	-1.41133
ABL1	YJL185C	0.0276243	-1.17465
ABL1	YJL186W	0.845304	-0.417875
ABL1	YJL187C	2.11602	0.488668
ABL1	YJL190C	0.0220994	-1.2702
ABL1	YJL193W	0.00552486	-0.841709
ABL1	YJL197W	2.75138	2.84752
ABL1	YJL198W	0.767956	0.196586
ABL1	YJL199C	0.972376	0.799934
ABL1	YJL206C-A	0.00552486	-1.00108
ABL1	YJL207C	0.60221	-0.569764
ABL1	YJL210W	0.823204	-0.78048
ABL1	YJL211C	0.0110497	-1.9603
ABL1	YJL212C	0.966851	-0.820379
ABL1	YJL214W	2.07182	0.565415
ABL1	YJL215C	0.00552486	-1.42197
ABL1	YJL216C	1.13812	-0.420643
ABL1	YJL217W	1.54144	0.722781
ABL1	YJL218W	0.0276243	-0.906138
ABL1	YJR004C	5.10497	1.82939
ABL1	YJR005W	0.0441989	-1.24395
ABL1	YJR008W	1.0663	0.072899
ABL1	YJR009C	1.01657	-0.829501
ABL1	YJR010W	0.0276243	-1.67668
ABL1	YJR015W	0.00552486	-1.19757
ABL1	YJR019C	2.44199	0.466219
ABL1	YJR020W	1.07182	-0.636736
ABL1	YJR021C	0.038674	-1.20011
ABL1	YJR026W	0.00552486	-1.27226
ABL1	YJR030C	0.00552486	-1.15103
ABL1	YJR031C	0.0165746	-1.83445
ABL1	YJR033C	1.01657	0.149317
ABL1	YJR035W	3.24309	1.05147
ABL1	YJR036C	3.22652	1.81885
ABL1	YJR037W	0.0441989	-1.59839
ABL1	YJR039W	0.0110497	-1.81647
ABL1	YJR040W	2.60773	2.23727
ABL1	YJR048W	3.59116	2.63569
ABL1	YJR049C	0.0662983	-0.93201
ABL1	YJR050W	1.86188	2.48051
ABL1	YJR051W	0.917127	-1.59832
ABL1	YJR052W	1.12707	-0.031385
ABL1	YJR053W	1.0884	-0.178606
ABL1	YJR054W	2.23757	1.65386
ABL1	YJR056C	0.00552486	-1.47931
ABL1	YJR058C	0.0331492	-1.70635
ABL1	YJR059W	0.00552486	-1.4026
ABL1	YJR061W	0.596685	-1.18982
ABL1	YJR062C	0.038674	-1.52435
ABL1	YJR066W	0.0110497	-0.822061
ABL1	YJR069C	0.0276243	-1.11542
ABL1	YJR070C	0.00552486	-1.12348
ABL1	YJR075W	0.0331492	-0.888407
ABL1	YJR077C	1.16022	1.69552
ABL1	YJR078W	0.513812	-1.85813
ABL1	YJR082C	1.28177	-0.845628
ABL1	YJR083C	1.71271	0.767746
ABL1	YJR084W	1.98895	1.03338
ABL1	YJR087W	4.64641	1.04459
ABL1	YJR091C	0.453039	-1.79174
ABL1	YJR092W	1.23757	-1.45014
ABL1	YJR094C	4.73481	0.666342
ABL1	YJR095W	0.00552486	-1.27457
ABL1	YJR096W	6.03867	2.1261
ABL1	YJR097W	1.32044	-0.455001
ABL1	YJR098C	3.05525	-0.351329
ABL1	YJR099W	1.53591	-0.814435
ABL1	YJR100C	0.558011	-1.21888
ABL1	YJR102C	0.80663	0.285785
ABL1	YJR103W	0.878453	0.0336541
ABL1	YJR106W	0.872928	-0.722419
ABL1	YJR107W	1.23204	-2.14844
ABL1	YJR108W	0.00552486	-1.27777
ABL1	YJR109C	2.69613	-0.742
ABL1	YJR110W	0.00552486	-1.63856
ABL1	YJR111C	0.640884	0.675033
ABL1	YJR115W	1.07182	-1.14188
ABL1	YJR116W	0.0110497	-1.72551
ABL1	YJR117W	1.35359	-1.27429
ABL1	YJR119C	2.94475	0.62734
ABL1	YJR120W	0.00552486	-1.08113
ABL1	YJR126C	0.038674	-1.3945
ABL1	YJR127C	1.40884	-0.676379
ABL1	YJR128W	0.0276243	-1.84686
ABL1	YJR129C	0.80663	-0.469047
ABL1	YJR130C	1.83425	0.780591
ABL1	YJR131W	0.0165746	-2.36321
ABL1	YJR133W	2.86188	-0.447206
ABL1	YJR134C	3.32597	2.0282
ABL1	YJR137C	0.0883978	-1.16839
ABL1	YJR140C	0.955801	1.14355
ABL1	YJR142W	0.972376	-0.4529
ABL1	YJR146W	13.8785	1.02678
ABL1	YJR147W	0.0165746	-1.54589
ABL1	YJR148W	1.0442	-0.976434
ABL1	YJR149W	0.038674	-1.76203
ABL1	YJR150C	0.0220994	-1.74319
ABL1	YJR152W	2.74033	0.556263
ABL1	YJR153W	0.0276243	-1.8575
ABL1	YLL005C	0.0110497	-1.6259
ABL1	YLL006W	1.58564	2.38372
ABL1	YLL007C	15.7403	2.20973
ABL1	YLL009C	0.0110497	-0.947131
ABL1	YLL012W	0.0276243	-1.91212
ABL1	YLL013C	0.038674	-1.04413
ABL1	YLL014W	2.02762	2.18818
ABL1	YLL017W	0.0110497	-1.16602
ABL1	YLL020C	0.038674	-0.973323
ABL1	YLL026W	2.13812	1.31584
ABL1	YLL028W	0.0110497	-1.32821
ABL1	YLL030C	0.0110497	-1.70825
ABL1	YLL032C	1.10497	-0.403402
ABL1	YLL039C	1.46409	1.72487
ABL1	YLL041C	0.038674	-0.959993
ABL1	YLL042C	2.55249	-0.0152705
ABL1	YLL046C	3.59116	-0.0434688
ABL1	YLL047W	2.29834	-0.612514
ABL1	YLL048C	0.972376	-0.723906
ABL1	YLL051C	0.961326	-1.0745
ABL1	YLL052C	0.0220994	-1.88804
ABL1	YLL053C	0.662983	-1.61914
ABL1	YLL054C	1.12707	-0.968522
ABL1	YLL055W	0.78453	-0.805059
ABL1	YLL056C	2.66298	0.367189
ABL1	YLL057C	0.972376	-1.28007
ABL1	YLL058W	1.26519	-1.11126
ABL1	YLL059C	0.0441989	-1.34382
ABL1	YLL060C	0.0110497	-2.30597
ABL1	YLL061W	0.0220994	-1.47879
ABL1	YLL062C	0.0110497	-1.87649
ABL1	YLL063C	0.00552486	-1.39746
ABL1	YLR001C	0.0497238	-1.4828
ABL1	YLR003C	0.00552486	-1.7911
ABL1	YLR004C	0.0220994	-1.20209
ABL1	YLR006C	0.00552486	-1.02146
ABL1	YLR011W	5.62983	2.85494
ABL1	YLR012C	0.618785	-1.06817
ABL1	YLR013W	0.872928	-0.65908
ABL1	YLR016C	1.31492	-0.112833
ABL1	YLR017W	1.28729	-0.762618
ABL1	YLR019W	10.3315	0.873443
ABL1	YLR020C	1.48066	0.110574
ABL1	YLR024C	0.00552486	-1.40761
ABL1	YLR025W	0.0110497	-0.94115
ABL1	YLR028C	0.00552486	-1.20115
ABL1	YLR030W	4.35912	1.78197
ABL1	YLR031W	0.0220994	-1.38434
ABL1	YLR032W	1.09392	1.69291
ABL1	YLR034C	0.0165746	-2.01378
ABL1	YLR035C	0.0220994	-1.41263
ABL1	YLR036C	2.00552	1.07995
ABL1	YLR037C	0.0110497	-1.45116
ABL1	YLR038C	0.0110497	-1.31615
ABL1	YLR040C	0.220994	-1.22469
ABL1	YLR041W	0.00552486	-1.8022
ABL1	YLR042C	0.994475	-0.878172
ABL1	YLR043C	2.12155	1.49172
ABL1	YLR046C	0.370166	-0.327207
ABL1	YLR047C	0.0110497	-1.46846
ABL1	YLR050C	0.0110497	-1.6755
ABL1	YLR053C	0.0165746	-0.840824
ABL1	YLR054C	1.01657	3.01562
ABL1	YLR057W	1.98343	2.39334
ABL1	YLR058C	0.40884	-0.734774
ABL1	YLR059C	0.00552486	-1.30449
ABL1	YLR063W	0.00552486	-1.35257
ABL1	YLR064W	0.0718232	-1.10786
ABL1	YLR070C	0.0331492	-1.69112
ABL1	YLR072W	0.0828729	-1.50051
ABL1	YLR073C	0.00552486	-1.39679
ABL1	YLR077W	0.0165746	-1.57626
ABL1	YLR080W	0.0110497	-1.54903
ABL1	YLR081W	3.34807	2.34847
ABL1	YLR084C	0.00552486	-1.61694
ABL1	YLR085C	3.02762	4.29585
ABL1	YLR089C	0.00552486	-0.970247
ABL1	YLR094C	4.8895	4.76215
ABL1	YLR096W	1.51934	0.344424
ABL1	YLR097C	1.8011	0.559771
ABL1	YLR098C	0.00552486	-1.07137
ABL1	YLR099C	0.00552486	-1.37356
ABL1	YLR107W	0.0110497	-1.59799
ABL1	YLR109W	0.0165746	-1.39911
ABL1	YLR110C	1.85083	1.47967
ABL1	YLR111W	0.0607735	-1.02636
ABL1	YLR112W	0.337017	-0.97603
ABL1	YLR114C	0.696133	-0.673377
ABL1	YLR118C	0.745856	-0.892906
ABL1	YLR119W	0.0110497	-1.50248
ABL1	YLR120C	0.436464	0.133725
ABL1	YLR122C	1.12707	-0.952018
ABL1	YLR123C	2.48619	0.698604
ABL1	YLR124W	2.01657	0.701937
ABL1	YLR125W	0.325967	-0.925874
ABL1	YLR126C	0.60221	-0.470793
ABL1	YLR130C	1.0663	0.201741
ABL1	YLR131C	3.13812	0.259879
ABL1	YLR136C	0.674033	0.313984
ABL1	YLR137W	1.90055	1.35986
ABL1	YLR138W	0.248619	-0.581746
ABL1	YLR142W	0.723757	-0.534854
ABL1	YLR152C	0.0220994	-1.24834
ABL1	YLR154C	0.00552486	-1.19413
ABL1	YLR171W	1.12707	0.392631
ABL1	YLR172C	0.828729	0.349882
ABL1	YLR174W	1.0221	0.673766
ABL1	YLR178C	1.01657	-0.0257894
ABL1	YLR180W	0.552486	-0.454787
ABL1	YLR183C	0.740331	0.145217
ABL1	YLR187W	0.00552486	-0.994418
ABL1	YLR189C	2.14365	1.47185
ABL1	YLR190W	0.0165746	-0.735023
ABL1	YLR192C	0.933702	-1.05314
ABL1	YLR201C	0.977901	1.03243
ABL1	YLR203C	0.00552486	-1.48326
ABL1	YLR205C	0.0110497	-1.60625
ABL1	YLR207W	0.00552486	-1.46878
ABL1	YLR209C	2.07182	0.430971
ABL1	YLR211C	0.0220994	-1.32924
ABL1	YLR213C	0.00552486	-0.809516
ABL1	YLR217W	0.038674	-0.622399
ABL1	YLR219W	1.1547	1.08118
ABL1	YLR224W	4.8011	1.48883
ABL1	YLR225C	0.651934	-0.605198
ABL1	YLR420W	0.0110497	-1.36458
ABL1	YML001W	0.0441989	-1.38608
ABL1	YML002W	0.0220994	-1.92477
ABL1	YML003W	0.0497238	-1.70262
ABL1	YML004C	0.259669	-1.08069
ABL1	YML005W	0.00552486	-1.66224
ABL1	YML006C	0.977901	0.216814
ABL1	YML007W	0.00552486	-1.68765
ABL1	YML009c	0.0110497	-1.7427
ABL1	YML011C	3.45304	0.501778
ABL1	YML012W	0.944751	0.693531
ABL1	YML017W	1.07735	-0.786685
ABL1	YML018C	0.00552486	-0.706179
ABL1	YML019W	0.127072	-1.10771
ABL1	YML020W	1.83425	1.50375
ABL1	YML022W	0.955801	-0.658512
ABL1	YML029W	1.02762	-0.346398
ABL1	YML030W	0.0331492	-0.616672
ABL1	YML031W	0.0165746	-2.17722
ABL1	YML032C-A	1.56354	1.0856
ABL1	YML035C-A	1.04972	0.685788
ABL1	YML036W	0.0220994	-2.10063
ABL1	YML037C	0.0607735	-1.73246
ABL1	YML042W	0.0110497	-1.74714
ABL1	YML048W	0.00552486	-0.955769
ABL1	YML051W	0.861878	-0.869545
ABL1	YML053C	2.1547	1.43798
ABL1	YML055W	0.0165746	-1.19011
ABL1	YML056C	0.79558	-0.374046
ABL1	YML057W	2.39227	1.24127
ABL1	YML058C-A	0.00552486	-1.36232
ABL1	YML059C	0.917127	-0.416086
ABL1	YML060W	0.00552486	-1.33211
ABL1	YML062C	0.364641	-0.509255
ABL1	YML066C	0.331492	-1.87093
ABL1	YML071C	0.895028	-0.245607
ABL1	YML074C	0.0441989	-2.13966
ABL1	YML076C	0.0110497	-1.30889
ABL1	YML078W	0.535912	-1.14167
ABL1	YML079W	1.1989	-0.608358
ABL1	YML080W	0.0441989	-1.48754
ABL1	YML081W	4.60221	2.17095
ABL1	YML082W	0.0718232	-1.33971
ABL1	YML084W	1.30939	-0.483476
ABL1	YML087C	1.20994	-1.18048
ABL1	YML088W	0.469613	-1.34606
ABL1	YML089C	0.906077	-1.08152
ABL1	YML090W	0.0110497	-1.53084
ABL1	YML095C	0.0497238	-1.62646
ABL1	YML096W	1.48066	0.11996
ABL1	YML100W	0.00552486	-1.62926
ABL1	YML100W-A	1.14365	0.0920466
ABL1	YML101C	2.0663	-0.4877
ABL1	YML102W	0.00552486	-1.06636
ABL1	YML104C	0.0441989	-1.43807
ABL1	YML107C	0.116022	-1.48536
ABL1	YML109W	0.0276243	-1.0138
ABL1	YML110C	0.00552486	-1.58847
ABL1	YML111W	0.00552486	-1.63797
ABL1	YML113W	0.00552486	-1.26411
ABL1	YML116W	1.36464	-0.6888
ABL1	YML117W-A	1.34254	0.425093
ABL1	YML118W	1.35912	0.875068
ABL1	YML119W	2.02762	0.859528
ABL1	YML122C	0.0276243	-1.6855
ABL1	YML123C	0.0110497	-1.96683
ABL1	YML131W	0.348066	-1.35684
ABL1	YMR002W	0.00552486	-1.10407
ABL1	YMR006C	3.06077	0.944844
ABL1	YMR007W	0.861878	-0.594474
ABL1	YMR008C	0.585635	-0.883344
ABL1	YMR009W	0.972376	-0.48993
ABL1	YMR011W	1.12707	0.446223
ABL1	YMR012W	1.45304	-0.179787
ABL1	YMR015C	1.68508	0.239092
ABL1	YMR017W	1.23757	-0.00408693
ABL1	YMR019W	0.00552486	-1.69268
ABL1	YMR020W	1.32044	-0.216159
ABL1	YMR022W	1.25414	-1.02719
ABL1	YMR023C	1.19337	1.07355
ABL1	YMR029C	0.00552486	-1.12828
ABL1	YMR034C	0.0607735	-1.52186
ABL1	YMR035W	0.994475	0.482052
ABL1	YMR039C	1.23757	0.469558
ABL1	YMR040W	1.28177	-0.348601
ABL1	YMR041C	1.53039	0.0177769
ABL1	YMR042W	0.038674	-1.21729
ABL1	YMR048W	0.679558	-0.434673
ABL1	YMR095C	5.58564	3.50512
ABL1	YMR096W	0.558011	-0.972859
ABL1	YMR097C	0.585635	0.707107
ABL1	YMR099C	0.0110497	-1.47297
ABL1	YMR100W	0.0220994	-1.35963
ABL1	YMR102C	0.78453	-0.682799
ABL1	YMR103C	1.46409	0.411102
ABL1	YMR104C	0.038674	-1.85567
ABL1	YMR105C	0.00552486	-1.24052
ABL1	YMR106C	1.85635	0.523445
ABL1	YMR107W	0.441989	-0.760856
ABL1	YMR109W	0.0220994	-1.90885
ABL1	YMR110C	0.00552486	-1.74169
ABL1	YMR111C	1.04972	-0.418421
ABL1	YMR114C	0.558011	-0.929128
ABL1	YMR118C	0.00552486	-2.03848
ABL1	YMR119W-A	3.44751	1.55067
ABL1	YMR120C	0.00552486	-1.66368
ABL1	YMR124W	0.00552486	-1.00979
ABL1	YMR126C	0.00552486	-1.16053
ABL1	YMR127C	0.0110497	-1.08045
ABL1	YMR129W	0.00552486	-1.49862
ABL1	YMR132C	0.486188	-0.708606
ABL1	YMR133W	0.0220994	-1.16157
ABL1	YMR140W	1.05525	-1.06663
ABL1	YMR141C	1.0884	-0.311058
ABL1	YMR144W	3.40884	1.98148
ABL1	YMR145C	1.09945	-2.03011
ABL1	YMR147W	2.87293	0.340825
ABL1	YMR148W	0.0165746	-1.39981
ABL1	YMR152W	2.02762	2.52708
ABL1	YMR153C-A	2.0884	-0.317074
ABL1	YMR153W	1.14365	-1.14912
ABL1	YMR154C	2.16022	-0.903286
ABL1	YMR155W	0.0497238	-1.86558
ABL1	YMR157C	0.0607735	-1.52869
ABL1	YMR158W-A	0.0718232	-1.87496
ABL1	YMR161W	4.0663	0.316216
ABL1	YMR162C	1.45304	-0.156212
ABL1	YMR163C	1.8674	0.0267087
ABL1	YMR164C	0.00552486	-1.64096
ABL1	YMR166C	0.0220994	-1.62823
ABL1	YMR167W	0.0110497	-1.69609
ABL1	YMR169c	0.0331492	-1.88213
ABL1	YMR170C	4.82873	-0.188807
ABL1	YMR171C	0.00552486	-1.24666
ABL1	YMR172C-A	0.00552486	-1.65496
ABL1	YMR172W	2.64641	-0.285834
ABL1	YMR173W-A	0.0441989	-1.64424
ABL1	YMR174c	1.77348	0.937144
ABL1	YMR175w	0.0165746	-0.677784
ABL1	YMR176W	0.0165746	-1.87293
ABL1	YMR177W	0.0497238	-1.46892
ABL1	YMR178W	2.63536	1.4329
ABL1	YMR180C	0.0552486	-2.32351
ABL1	YMR181C	0.0276243	-1.22158
ABL1	YMR182C	0.00552486	-1.75582
ABL1	YMR183C	1.32044	-0.306683
ABL1	YMR184W	0.0110497	-1.55887
ABL1	YMR186W	0.0331492	-1.08719
ABL1	YMR187C	1.42541	-0.503729
ABL1	YMR191W	1.86188	0.720418
ABL1	YMR192W	0.0607735	-1.84081
ABL1	YMR195W	2.77348	0.985294
ABL1	YMR196W	0.00552486	-1.65445
ABL1	YMR199W	1.61878	0.937938
ABL1	YMR201C	0.00552486	-1.06682
ABL1	YMR204C	0.0497238	-1.43542
ABL1	YMR206W	0.00552486	-1.4364
ABL1	YMR209C	0.00552486	-1.35388
ABL1	YMR210W	0.0441989	-1.90098
ABL1	YMR215W	0.0220994	-1.2553
ABL1	YMR216C	0.00552486	-0.93604
ABL1	YMR221C	0.00552486	-1.65819
ABL1	YMR223W	0.0276243	-1.26334
ABL1	YMR226C	0.00552486	-0.929356
ABL1	YMR230W	0.58011	1.06355
ABL1	YMR232W	1.06077	-1.11871
ABL1	YMR233W	0.0331492	-1.66397
ABL1	YMR234W	0.00552486	-1.1181
ABL1	YMR238W	0.00552486	-1.5424
ABL1	YMR244C-A	0.944751	1.76236
ABL1	YMR244W	1.30387	0.88269
ABL1	YMR246W	3.36464	2.45955
ABL1	YMR247C	0.0331492	-2.10425
ABL1	YMR251W-A	0.00552486	-1.37819
ABL1	YMR252C	0.469613	-1.13283
ABL1	YMR253C	0.872928	-0.706034
ABL1	YMR254C	0.00552486	-1.13951
ABL1	YMR255W	0.00552486	-1.24462
ABL1	YMR259C	1.29834	-0.71412
ABL1	YMR264W	0.0331492	-1.72655
ABL1	YMR265C	0.0718232	-1.51027
ABL1	YMR271C	0.895028	-1.42652
ABL1	YMR273C	0.00552486	-1.68086
ABL1	YMR274C	1.13812	-1.02209
ABL1	YMR276W	2.40331	-0.100237
ABL1	YMR278W	1.70166	-1.15345
ABL1	YMR279C	1.12155	-0.623183
ABL1	YMR280C	0.425414	-1.53362
ABL1	YMR283C	0.0607735	-2.06808
ABL1	YMR284W	1.48066	0.140519
ABL1	YMR285C	1.81215	-0.36612
ABL1	YMR286W	0.348066	0.922876
ABL1	YMR291W	0.734807	-0.640046
ABL1	YMR292W	0.00552486	-1.36624
ABL1	YMR294W-A	1.07735	-0.0908505
ABL1	YMR295C	0.657459	2.33981
ABL1	YMR299C	0.00552486	-1.34027
ABL1	YMR302C	0.0110497	-1.36566
ABL1	YMR303C	0.00552486	-1.18928
ABL1	YMR304C-A	0.502762	-1.54042
ABL1	YMR304W	0.149171	-0.605579
ABL1	YMR305C	0.00552486	-0.793771
ABL1	YMR306C-A	0.453039	-1.09013
ABL1	YMR306W	1.14365	-0.948633
ABL1	YMR307W	1401.04	2.71252
ABL1	YMR311C	0.850829	-0.71253
ABL1	YMR313C	0.403315	-1.07589
ABL1	YMR315W	3.34807	0.740414
ABL1	YMR316C-A	0.00552486	-1.25901
ABL1	YMR316C-B	0.00552486	-1.36424
ABL1	YMR316W	0.657459	-0.876786
ABL1	YMR317W	1.88398	-0.508253
ABL1	YMR318C	3.28177	0.176764
ABL1	YMR320W	2.47514	-0.372487
ABL1	YNL051W	0.00552486	-1.18919
ABL1	YNL052W	0.0497238	-1.15652
ABL1	YNL054W	0.0276243	-1.27233
ABL1	YNL056W	9.60773	0.712531
ABL1	YNL057W	0.607735	-1.45881
ABL1	YNL058C	0.834254	0.094837
ABL1	YNL063W	2.62431	-0.785841
ABL1	YNL065W	0.0276243	-1.83142
ABL1	YNL066W	2.19337	-0.613731
ABL1	YNL068C	0.00552486	-1.33279
ABL1	YNL070W	0.0110497	-1.13247
ABL1	YNL071W	0.690608	0.0235363
ABL1	YNL072W	2.30939	0.370238
ABL1	YNL074C	0.0441989	-2.06429
ABL1	YNL076W	1.37017	-0.641247
ABL1	YNL077W	0.0220994	-1.00786
ABL1	YNL078W	0.950276	-1.68713
ABL1	YNL082W	1.12155	-0.607741
ABL1	YNL083W	0.00552486	-1.18067
ABL1	YNL085W	0.955801	-1.04056
ABL1	YNL087W	0.0220994	-1.81167
ABL1	YNL090W	0.480663	-1.43179
ABL1	YNL091W	0.00552486	-1.30867
ABL1	YNL093W	2.35912	2.14775
ABL1	YNL094W	0.966851	-0.770718
ABL1	YNL095C	0.585635	-1.5176
ABL1	YNL099C	1.8674	-0.705401
ABL1	YNL100W	0.668508	-0.865915
ABL1	YNL101W	0.0220994	-1.9995
ABL1	YNL104C	0.00552486	-1.56278
ABL1	YNL105W	0.0331492	-1.96114
ABL1	YNL106C	0.0441989	-1.43272
ABL1	YNL108C	0.0441989	-1.53791
ABL1	YNL115C	3.61326	2.89078
ABL1	YNL116W	1.89503	0.774037
ABL1	YNL120C	1.07182	2.35433
ABL1	YNL122C	0.961326	-0.767341
ABL1	YNL123W	0.585635	-0.94054
ABL1	YNL125C	0.0220994	-1.70461
ABL1	YNL129W	2.72376	0.029659
ABL1	YNL130C	0.80663	-0.716694
ABL1	YNL134C	1.24862	-0.519201
ABL1	YNL141W	0.00552486	-1.8509
ABL1	YNL143C	3.75691	0.931842
ABL1	YNL144C	2.90055	1.30212
ABL1	YNL145W	0.0331492	-1.68857
ABL1	YNL146W	2.85083	0.422491
ABL1	YNL154C	0.0276243	-1.0763
ABL1	YNL160W	0.0165746	-1.09596
ABL1	YNL168C	1.79006	1.12538
ABL1	YNL170W	0.0165746	-0.574333
ABL1	YNL173C	0.00552486	-1.196
ABL1	YNL175C	0.00552486	-0.858489
ABL1	YNL178W	0.00552486	-0.57062
ABL1	YNL179C	0.430939	-0.162405
ABL1	YNL181W	0.585635	0.707107
ABL1	YNL183C	1.98343	0.188165
ABL1	YNL187W	0.674033	0.814217
ABL1	YNL190W	1.28729	0.122689
ABL1	YNL193W	0.955801	-0.058904
ABL1	YNL195C	2.10497	0.209037
ABL1	YNL196C	0.933702	1.67727
ABL1	YNL198C	0.685083	-0.463896
ABL1	YNL200C	1.35359	-0.397244
ABL1	YNL201C	0.0607735	-1.18936
ABL1	YNL202W	0.0220994	-1.71166
ABL1	YNL204C	0.00552486	-0.927088
ABL1	YNL205C	0.00552486	-1.11851
ABL1	YNL211C	0.458564	0.343277
ABL1	YNL212W	0.0165746	-0.879889
ABL1	YNL214W	0.0110497	-1.00505
ABL1	YNL219C	0.497238	-0.56801
ABL1	YNL224C	1.23757	1.66417
ABL1	YNL230C	0.0110497	-1.101
ABL1	YNL242W	0.00552486	-1.20371
ABL1	YNL249C	1.00552	-0.507809
ABL1	YNL254C	3.51934	2.69007
ABL1	YNL255C	0.0607735	-1.76199
ABL1	YNL256W	0.00552486	-0.572587
ABL1	YNL257C	0.497238	-1.2775
ABL1	YNL259C	0.508287	-0.622654
ABL1	YNL260C	0.00552486	-0.623279
ABL1	YNL262W	0.0552486	-0.43022
ABL1	YNL265C	0.00552486	-1.23577
ABL1	YNL266W	1.04972	-0.648989
ABL1	YNL270C	0.0220994	-1.40715
ABL1	YNL271C	1.1989	3.29374
ABL1	YNL274C	0.977901	-1.39702
ABL1	YNL275W	0.00552486	-1.65473
ABL1	YNL278W	0.00552486	-1.13286
ABL1	YNL279W	5.71823	1.02553
ABL1	YNL281W	0.0110497	-1.4554
ABL1	YNL285W	0.0110497	-1.25873
ABL1	YNL286W	0.646409	0.0478665
ABL1	YNL288W	1.19337	-0.443264
ABL1	YNL289W	7.18232	4.11779
ABL1	YNL292W	0.0220994	-1.25581
ABL1	YNL294C	0.513812	-1.76945
ABL1	YNL295W	2.81768	0.993641
ABL1	YNL300W	1.12155	0.0102281
ABL1	YNL301C	0.928177	-0.633883
ABL1	YNL303W	1.27072	0.18446
ABL1	YNL304W	1.25414	-0.721629
ABL1	YNL311C	5.69613	2.00526
ABL1	YNL316C	0.00552486	-1.43597
ABL1	YNL318C	0.0110497	-1.29581
ABL1	YNL321W	1.28729	-1.04923
ABL1	YNL322C	3.74586	2.5535
ABL1	YNL324W	0.00552486	-1.0746
ABL1	YNL326C	1.81768	0.101173
ABL1	YNL327W	0.0220994	-1.23314
ABL1	YNL329C	0.640884	-0.839772
ABL1	YNL333W	0.933702	-0.647623
ABL1	YNL335W	0.00552486	-1.77542
ABL1	YNL336W	4.25414	0.915964
ABL1	YNL338W	0.00552486	-1.26327
ABL1	YNL339C	0.453039	-1.66057
ABL1	YOL002C	0.00552486	-1.03883
ABL1	YOL003C	0.0110497	-1.08705
ABL1	YOL006C	1.1105	1.05832
ABL1	YOL007C	0.176796	-0.913292
ABL1	YOL008W	0.00552486	-0.457021
ABL1	YOL011W	0.00552486	-1.4146
ABL1	YOL013C	0.569061	-1.13257
ABL1	YOL014W	0.0276243	-1.78575
ABL1	YOL015W	0.00552486	-1.3074
ABL1	YOL016C	1.58564	-0.115958
ABL1	YOL019W	0.00552486	-1.31953
ABL1	YOL025W	0.00552486	-1.02191
ABL1	YOL027C	2.02762	3.12425
ABL1	YOL031C	0.0276243	-1.14529
ABL1	YOL032W	0.00552486	-1.51746
ABL1	YOL035C	0.00552486	-1.68841
ABL1	YOL036W	0.0718232	-1.37579
ABL1	YOL037C	0.353591	-0.728391
ABL1	YOL045W	0.0110497	-1.67898
ABL1	YOL046C	0.00552486	-1.22118
ABL1	YOL047C	1.16022	0.0377601
ABL1	YOL048C	2.65746	3.76184
ABL1	YOL053C-A	0.00552486	-0.955439
ABL1	YOL055C	0.00552486	-1.42782
ABL1	YOL058W	2.28729	0.695178
ABL1	YOL059W	0.0165746	-0.871308
ABL1	YOL060C	0.00552486	-1.05108
ABL1	YOL061W	0.0828729	-1.31569
ABL1	YOL062C	0.0165746	-1.31765
ABL1	YOL064C	0.0165746	-0.430713
ABL1	YOL065C	1.27624	-0.326387
ABL1	YOL070C	0.519337	-0.8782
ABL1	YOL071W	1.24862	-0.223284
ABL1	YOL075C	0.104972	-1.32543
ABL1	YOL079W	3.66298	2.97015
ABL1	YOL082W	0.0331492	-1.43058
ABL1	YOL083W	1.06077	1.16596
ABL1	YOL084W	2.48066	0.478511
ABL1	YOL085C	0.0497238	-1.83537
ABL1	YOR002W	0.0220994	-1.29466
ABL1	YOR003W	0.038674	-1.60567
ABL1	YOR005C	0.0331492	-1.69121
ABL1	YOR006C	0.00552486	-0.902571
ABL1	YOR007C	0.0110497	-1.41322
ABL1	YOR009W	1.02762	-0.831897
ABL1	YOR011W	1.60221	-0.635451
ABL1	YOR012W	7.0884	2.32734
ABL1	YOR013W	0.00552486	-1.32498
ABL1	YOR015W	0.0165746	-1.74949
ABL1	YOR016C	0.0883978	-1.47983
ABL1	YOR017W	1.27624	0.160942
ABL1	YOR018W	2.81768	1.3736
ABL1	YOR022C	0.950276	-0.834946
ABL1	YOR023C	1.32597	-0.522434
ABL1	YOR025W	0.00552486	-1.31206
ABL1	YOR028C	3.16575	0.384533
ABL1	YOR029W	0.0165746	-1.86477
ABL1	YOR030W	0.00552486	-1.55162
ABL1	YOR031W	0.0441989	-1.50219
ABL1	YOR032C	1.24862	-0.179199
ABL1	YOR033C	0.834254	0.830709
ABL1	YOR034C	0.00552486	-1.05969
ABL1	YOR037W	3.92818	0.845954
ABL1	YOR040W	0.889503	-0.70481
ABL1	YOR041C	0.0331492	-1.34736
ABL1	YOR042W	0.546961	-0.875511
ABL1	YOR043W	0.607735	-0.778702
ABL1	YOR044W	0.0110497	-1.10854
ABL1	YOR045W	1.50829	0.462722
ABL1	YOR050C	3.23757	1.14384
ABL1	YOR051C	0.0220994	-0.984715
ABL1	YOR052C	0.0331492	-1.33273
ABL1	YOR053W	1.09392	-0.5326
ABL1	YOR054C	0.00552486	-1.31254
ABL1	YOR055W	3.60773	2.10547
ABL1	YOR058C	0.0165746	-1.24787
ABL1	YOR059C	6.06077	0.80216
ABL1	YOR061W	1.28729	-0.470658
ABL1	YOR062C	0.00552486	-1.7732
ABL1	YOR064C	0.0110497	-0.986985
ABL1	YOR066W	0.535912	0.0963197
ABL1	YOR067C	2.01105	0.276275
ABL1	YOR068C	0.773481	-1.3185
ABL1	YOR069W	1.43094	-0.333902
ABL1	YOR079C	0.0497238	-1.58041
ABL1	YOR081C	0.513812	-0.766916
ABL1	YOR082C	0.0165746	-1.7845
ABL1	YOR084W	0.0110497	-0.985526
ABL1	YOR085W	0.944751	0.749158
ABL1	YOR086C	0.00552486	-1.23789
ABL1	YOR089C	0.0110497	-0.909543
ABL1	YOR090C	1.96133	-0.608495
ABL1	YOR091W	0.0220994	-1.1041
ABL1	YOR093C	4.26519	2.01977
ABL1	YOR094W	0.00552486	-1.68386
ABL1	YOR097C	0.0165746	-1.31224
ABL1	YOR100C	1.85083	1.92243
ABL1	YOR106W	0.00552486	-0.981155
ABL1	YOR107W	1.14917	-0.00817779
ABL1	YOR111W	0.00552486	-1.02938
ABL1	YOR112W	0.0110497	-1.45257
ABL1	YOR114W	0.038674	-1.68602
ABL1	YOR115C	4.39227	3.55094
ABL1	YOR118W	0.0220994	-0.953085
ABL1	YOR121C	0.21547	-0.243537
ABL1	YOR124C	1.66298	1.18597
ABL1	YOR125C	0.0441989	-1.32575
ABL1	YOR126C	2.75691	0.234429
ABL1	YOR129C	2.51934	3.91469
ABL1	YOR130C	0.574586	-0.116443
ABL1	YOR134W	0.0220994	-1.08532
ABL1	YOR136W	0.845304	2.9787
ABL1	YOR137C	0.977901	2.87586
ABL1	YOR138C	0.541436	2.99185
ABL1	YOR139C	0.883978	1.46106
ABL1	YOR142W	1.98343	0.248964
ABL1	YOR150W	0.0331492	-0.956354
ABL1	YOR152C	3.75138	-1.05824
ABL1	YOR153W	2.53039	0.817022
ABL1	YOR154W	0.0276243	-1.00864
ABL1	YOR155C	7.27624	1.98214
ABL1	YOR156C	0.0441989	-1.822
ABL1	YOR158W	0.0331492	-1.2937
ABL1	YOR161C	1.58564	-1.23623
ABL1	YOR162C	0.0220994	-1.0509
ABL1	YOR163W	3.66851	3.96376
ABL1	YOR165W	0.00552486	-1.10028
ABL1	YOR170W	0.00552486	-0.709807
ABL1	YOR171C	0.00552486	-0.807321
ABL1	YOR172W	1.51934	1.49428
ABL1	YOR173W	0.0110497	-1.36767
ABL1	YOR175C	0.955801	2.32052
ABL1	YOR178C	0.00552486	-0.887955
ABL1	YOR180C	0.447514	-1.1841
ABL1	YOR185C	0.939227	0.443124
ABL1	YOR188W	3.71271	-0.172259
ABL1	YOR193W	0.0110497	-1.37157
ABL1	YOR195W	0.0165746	-0.947276
ABL1	YOR202W	1.06077	0.39936
ABL1	YOR208W	0.00552486	-1.24881
ABL1	YOR213C	0.00552486	-0.921324
ABL1	YOR215C	0.0331492	-1.02328
ABL1	YOR216C	2.97238	2.10417
ABL1	YOR223W	0.0220994	-1.46662
ABL1	YOR229W	0.524862	-0.305344
ABL1	YOR233W	0.038674	-1.21203
ABL1	YOR242C	0.0110497	-1.26192
ABL1	YOR243C	0.917127	0.695143
ABL1	YOR245C	2.55249	3.54365
ABL1	YOR247W	2.66298	2.5343
ABL1	YOR252W	0.994475	1.97169
ABL1	YOR253W	0.696133	-0.914376
ABL1	YOR255W	0.0220994	-1.49907
ABL1	YOR263C	0.0110497	-1.2703
ABL1	YOR267C	0.00552486	-0.922745
ABL1	YOR268C	0.00552486	-1.41464
ABL1	YOR271C	0.0110497	-0.925757
ABL1	YOR273C	0.0441989	-1.58686
ABL1	YOR274W	0.696133	0.692747
ABL1	YOR275C	0.0110497	-1.62358
ABL1	YOR283W	1.10497	-0.773118
ABL1	YOR284W	1.30387	0.285123
ABL1	YOR285W	5.09392	3.09237
ABL1	YOR286W	0.00552486	-1.21267
ABL1	YOR289W	5.49171	3.2606
ABL1	YOR291W	0.0110497	-1.40873
ABL1	YOR292C	0.00552486	-1.08658
ABL1	YOR297C	1.20442	-1.19064
ABL1	YOR298W	1.17127	-1.04839
ABL1	YOR300W	2.10497	-1.08224
ABL1	YOR304W	0.0718232	-1.62966
ABL1	YOR306C	3.29834	-0.159104
ABL1	YOR307C	2.20994	2.09307
ABL1	YOR311C	0.0165746	-0.809844
ABL1	YOR313C	2.48066	0.260693
ABL1	YOR314W	0.0110497	-1.02197
ABL1	YOR315W	0.98895	0.283685
ABL1	YOR316C	2.40331	-0.313969
ABL1	YOR318C	1.24862	-0.359207
ABL1	YOR320C	1.81768	-0.435667
ABL1	YOR321W	6.70718	3.69321
ABL1	YOR323C	0.0110497	-1.19976
ABL1	YOR324C	0.0110497	-1.31931
ABL1	YOR325W	2.60773	-1.33566
ABL1	YOR326W	0.906077	0.644055
ABL1	YOR327C	0.646409	-1.40025
ABL1	YOR328W	0.038674	-2.21047
ABL1	YOR329C	1.07182	2.20994
ABL1	YOR333C	1.98343	-1.01945
ABL1	YOR334W	1.98895	-0.718919
ABL1	YOR335C	0.0110497	-0.74137
ABL1	YOR337W	0.0110497	-1.91528
ABL1	YOR338W	0.585635	-0.841742
ABL1	YOR340C	0.0331492	-0.497898
ABL1	YOR342C	0.0994475	-1.59317
ABL1	YOR343C	1.62983	-0.488174
ABL1	YOR345C	0.629834	-1.66249
ABL1	YOR347C	1.64088	-0.223043
ABL1	YOR348C	2.58011	0.769837
ABL1	YOR354C	1.40331	0.101173
ABL1	YOR356W	0.0276243	-1.20572
ABL1	YOR357C	0.038674	-1.18953
ABL1	YOR361C	1.18785	1.04262
ABL1	YOR363C	0.530387	-0.10722
ABL1	YOR366W	0.911602	-0.581253
ABL1	YOR367W	0.00552486	-1.01604
ABL1	YOR368W	1.01105	0.410812
ABL1	YOR371C	0.61326	0.794169
ABL1	YOR374W	1.91713	1.87463
ABL1	YOR378W	0.165746	-1.09129
ABL1	YOR379C	3.76796	1.15155
ABL1	YOR380W	0.0165746	-1.25543
ABL1	YOR381W	1.1547	-0.373169
ABL1	YOR382W	0.154696	-1.4801
ABL1	YOR384W	2.1768	0.321027
ABL1	YPL002C	0.872928	1.06264
ABL1	YPL003W	0.552486	-0.415911
ABL1	YPL006W	0.895028	-0.44392
ABL1	YPL013C	0.911602	-0.00539441
ABL1	YPL014W	0.458564	-0.862312
ABL1	YPL015C	0.209945	-1.33571
ABL1	YPL019C	1	1.88502
ABL1	YPL021W	0.0110497	-1.77372
ABL1	YPL022W	2.64641	2.16453
ABL1	YPL023C	0.0662983	-2.00222
ABL1	YPL027W	1.73481	2.07518
ABL1	YPL032C	2.20442	0.578027
ABL1	YPL034W	1.16022	-1.20472
ABL1	YPL036W	0.0718232	-2.62275
ABL1	YPL037C	0.668508	0.837961
ABL1	YPL039W	1.09392	0.349968
ABL1	YPL041C	0.00552486	-1.35464
ABL1	YPL046C	0.0220994	-0.787541
ABL1	YPL048W	0.0441989	-1.2955
ABL1	YPL064C	0.0110497	-1.11634
ABL1	YPL065W	0.701657	-0.0358781
ABL1	YPL067C	2.69613	1.85199
ABL1	YPL070W	1.08287	-0.00688113
ABL1	YPL073C	0.944751	0.613283
ABL1	YPL084W	1.12155	1.23838
ABL1	YPL089C	0.00552486	-1.2052
ABL1	YPL096W	0.0165746	-1.76804
ABL1	YPL098C	0.00552486	-0.582598
ABL1	YPL099C	1.63536	0.339936
ABL1	YPL103C	0.0110497	-1.4468
ABL1	YPL105C	0.850829	-0.211941
ABL1	YPL107W	0.00552486	-1.19444
ABL1	YPL108W	0.679558	0.50564
ABL1	YPL109C	1.14365	1.3395
ABL1	YPL110C	1.86188	0.838221
ABL1	YPL113C	1.60773	3.57857
ABL1	YPL114W	0.0110497	-0.931583
ABL1	YPL115C	0.0276243	-1.28704
ABL1	YPL116W	1.06077	-0.177414
ABL1	YPL119C	1.71823	0.22751
ABL1	YPL120W	0.977901	-0.566499
ABL1	YPL121C	0.0110497	-1.84842
ABL1	YPL130W	1.1547	0.0250221
ABL1	YPL132W	1.49171	0.878233
ABL1	YPL133C	0.0220994	-1.16135
ABL1	YPL134C	0.0165746	-1.70935
ABL1	YPL135W	0.038674	-1.57463
ABL1	YPL136W	1.22099	0.647953
ABL1	YPL138C	0.0276243	-0.693677
ABL1	YPL139C	0.0110497	-1.1806
ABL1	YPL141C	0.0331492	-2.00209
ABL1	YPL144W	0.646409	0.850033
ABL1	YPL145C	0.712707	-1.3089
ABL1	YPL147W	1.23757	-0.582092
ABL1	YPL149W	0.038674	-1.65617
ABL1	YPL150W	0.469613	-0.698835
ABL1	YPL152W	0.640884	-0.0689915
ABL1	YPL154C	3.43094	1.00109
ABL1	YPL155C	0.0497238	-1.59094
ABL1	YPL156C	2.72376	2.49113
ABL1	YPL159C	0.480663	-0.915642
ABL1	YPL162C	0.0220994	-1.31384
ABL1	YPL163C	1.23757	0.134352
ABL1	YPL164C	0.0110497	-1.66583
ABL1	YPL165C	0.0883978	-2.00074
ABL1	YPL166W	2.20994	0.236513
ABL1	YPL167C	0.0718232	-1.73539
ABL1	YPL168W	1.27624	-0.420145
ABL1	YPL170W	0.00552486	-1.27423
ABL1	YPL174C	0.966851	1.81743
ABL1	YPL176C	0.00552486	-1.6093
ABL1	YPL177C	3.60221	1.88289
ABL1	YPL179W	0.138122	-1.22078
ABL1	YPL181W	0.0110497	-1.06882
ABL1	YPL182C	0.00552486	-1.27324
ABL1	YPL184C	0.0110497	-1.26779
ABL1	YPL185W	0.00552486	-1.93334
ABL1	YPL187W	0.038674	-1.18231
ABL1	YPL192C	1.05525	-0.3446
ABL1	YPL196W	2.44199	0.799939
ABL1	YPL198W	0.0828729	-1.51786
ABL1	YPL199C	0.0441989	-1.38364
ABL1	YPL201C	0.00552486	-1.14332
ABL1	YPL202C	0.596685	0.883219
ABL1	YPL203W	0.038674	-1.05474
ABL1	YPL207W	0.0165746	-1.30355
ABL1	YPL212C	0.823204	-0.377797
ABL1	YPL214C	0.00552486	-0.884273
ABL1	YPL219W	1.14917	0.303741
ABL1	YPL220W	0.0110497	-0.845636
ABL1	YPL222W	0.0276243	-1.24047
ABL1	YPL223C	0.0220994	-1.43901
ABL1	YPL226W	4.71823	0.830603
ABL1	YPL227C	0.0607735	-1.33861
ABL1	YPL229W	0.0110497	-1.48899
ABL1	YPL230W	0.00552486	-1.57529
ABL1	YPL232W	0.0165746	-0.997463
ABL1	YPL236C	3.18232	2.98379
ABL1	YPL240C	1.16575	-0.183086
ABL1	YPL246C	0.0773481	-1.18845
ABL1	YPL247C	0.00552486	-1.05785
ABL1	YPL249C	0.0276243	-1.28002
ABL1	YPL250C	0.0441989	-1.22397
ABL1	YPL256C	4.64088	2.97476
ABL1	YPL257W	0.00552486	-1.08767
ABL1	YPL258C	0.104972	-1.14433
ABL1	YPL260W	1.08287	1.92138
ABL1	YPL261C	0.00552486	-1.39369
ABL1	YPL263C	1.68508	0.0936963
ABL1	YPL264C	0.0110497	-1.98434
ABL1	YPL267W	1.09945	0.228136
ABL1	YPL269W	0.441989	0.523627
ABL1	YPL272C	0.0110497	-1.19135
ABL1	YPL273W	3.10497	2.3757
ABL1	YPL274W	0.0165746	-1.4073
ABL1	YPR001W	0.0165746	-1.72853
ABL1	YPR004C	1.43646	1.90924

## Sheet: ACVR1
Table S2. Barcode counts of yeast deletion strains obtained from high-throughput sequencing.
Query (Kinase)	Subject (yeast gene deletion)	Normalized barcode counts	Z-score
ACVR1	YAL002W	1.37502	1.28868
ACVR1	YAL004W	1.13692	0.259981
ACVR1	YAL005C	1.91741	-0.0564746
ACVR1	YAL007C	0.826982	0.134805
ACVR1	YAL008W	0.267677	-0.251467
ACVR1	YAL009W	0.314169	-0.0519328
ACVR1	YAL011W	0.50436	0.52595
ACVR1	YAL012W	3.19804	0.0249918
ACVR1	YAL013W	0.0958003	-0.509033
ACVR1	YAL014C	1.50181	0.961353
ACVR1	YAL015C	1.3891	-0.076987
ACVR1	YAL017W	0.695961	-0.175129
ACVR1	YAL018C	0.931235	0.0803851
ACVR1	YAL019W	0.686099	-0.0841359
ACVR1	YAL020C	0.0267677	-0.661354
ACVR1	YAL021C	0.398698	0.53936
ACVR1	YAL022C	0.91292	-0.0801954
ACVR1	YAL023C	0.26486	0.928498
ACVR1	YAL026C	0.0154971	-0.649694
ACVR1	YAL027W	5.40567	4.41387
ACVR1	YAL028W	1.12002	-0.21903
ACVR1	YAL029C	0.883335	0.0116873
ACVR1	YAL030W	0.664967	-0.456089
ACVR1	YAL031C	0.919964	0.490239
ACVR1	YAL034C	1.16651	0.331031
ACVR1	YAL036C	1.1017	-0.115413
ACVR1	YAL037W	0.857976	0.131969
ACVR1	YAL039C	0.426875	-0.349267
ACVR1	YAL040C	0.0535355	-0.745086
ACVR1	YAL042W	0.821347	0.0589473
ACVR1	YAL043C-	0.63679	0.931827
ACVR1	YAL044C	0.0718502	-0.687979
ACVR1	YAL045C	1.08198	0.691828
ACVR1	YAL046C	0.38461	-0.175254
ACVR1	YAL048C	0.184556	-0.776635
ACVR1	YAL049C	0.519857	0.227233
ACVR1	YAL051W	1.26513	0.595247
ACVR1	YAL053W	1.75963	0.553914
ACVR1	YAL054C	0.0831208	-0.516049
ACVR1	YAL055W	1.07775	0.106988
ACVR1	YAL056W	1.74554	1.35999
ACVR1	YAL058W	0.950959	0.48841
ACVR1	YAL059W	0.315577	0.0516711
ACVR1	YAL060W	2.80357	2.11866
ACVR1	YAL061W	1.15242	-0.0265871
ACVR1	YAL062W	1.34825	-0.137753
ACVR1	YAL065C	1.07634	0.241095
ACVR1	YAL066W	0.869247	0.521612
ACVR1	YAL067C	2.03857	0.513028
ACVR1	YAL068C	1.87938	0.0469218
ACVR1	YAR003W	0.0972091	-0.480459
ACVR1	YAR014C	0.322622	0.00343341
ACVR1	YAR018C	0.188783	-0.17913
ACVR1	YAR020C	0.814302	-0.237132
ACVR1	YAR023C	0.594525	0.101839
ACVR1	YAR027W	0.945323	0.727418
ACVR1	YAR028W	1.05521	-0.279879
ACVR1	YAR029W	1.06507	-0.287211
ACVR1	YAR030C	1.32571	0.719931
ACVR1	YAR031W	1.02422	-0.295667
ACVR1	YAR035W	0.712867	-0.171533
ACVR1	YAR037W	1.21441	0.324412
ACVR1	YAR040C	1.35107	0.865491
ACVR1	YAR042W	1.26935	0.491297
ACVR1	YAR043C	0.590299	0.634471
ACVR1	YAR044W	0.340936	-0.402235
ACVR1	YAR047C	1.03549	0.0642261
ACVR1	YBL001C	0.269086	-0.191997
ACVR1	YBL002W	0.321213	-0.2802
ACVR1	YBL003C	0.164833	-0.579217
ACVR1	YBL005W	0.843888	-0.286288
ACVR1	YBL006C	0.0436737	-0.397775
ACVR1	YBL007C	0.0394472	-0.588262
ACVR1	YBL008W	0.135247	-0.20817
ACVR1	YBL009W	0.555078	-0.173737
ACVR1	YBL010C	0.657923	-0.178399
ACVR1	YBL011W	1.23272	0.21565
ACVR1	YBL012C	1.11861	0.291833
ACVR1	YBL013W	0.666376	-0.183161
ACVR1	YBL015W	1.25245	0.164763
ACVR1	YBL017C	0.235274	-0.26358
ACVR1	YBL019W	0.569166	-0.291819
ACVR1	YBL022C	0.102844	-0.46726
ACVR1	YBL024W	0.11975	-0.567625
ACVR1	YBL028C	0.595934	0.539926
ACVR1	YBL029W	0.0154971	-1.09713
ACVR1	YBL031W	0.114115	-0.292801
ACVR1	YBL032W	0.0859385	-0.681119
ACVR1	YBL036C	0.976318	0.149478
ACVR1	YBL037W	0.470548	-0.193058
ACVR1	YBL038W	0.277539	-0.351531
ACVR1	YBL039C	0.00140883	-0.707107
ACVR1	YBL042C	0.32403	-0.142315
ACVR1	YBL043W	0.136656	-0.721562
ACVR1	YBL044W	0.414195	0.0507929
ACVR1	YBL045C	1.31585	0.311291
ACVR1	YBL046W	0.366295	0.504965
ACVR1	YBL047C	0.0380383	-0.701691
ACVR1	YBL048W	0.483228	-0.00491436
ACVR1	YBL049W	0.686099	-0.481832
ACVR1	YBL051C	0.109889	-0.543899
ACVR1	YBL052C	0.381792	-0.0450046
ACVR1	YBL053W	1.23554	-0.0762062
ACVR1	YBL054W	0.378975	0.12799
ACVR1	YBL055C	0.340936	-0.82224
ACVR1	YBL056W	0.849523	0.343683
ACVR1	YBL057C	0.81712	-0.0292584
ACVR1	YBL059W	1.25386	-0.252149
ACVR1	YBL060W	0.515631	-0.158298
ACVR1	YBL061C	1.49758	0.682052
ACVR1	YBL062W	0.970682	0.299624
ACVR1	YBL063W	0.772038	-0.433817
ACVR1	YBL064C	0.958003	-0.209487
ACVR1	YBL066C	1.4525	-0.0881634
ACVR1	YBL067C	1.52435	0.463594
ACVR1	YBL068W	1.18201	-0.248636
ACVR1	YBL069W	1.17214	-0.140075
ACVR1	YBL070C	1.06648	-0.363195
ACVR1	YBL071C	0.0648061	-0.679623
ACVR1	YBL072C	0.214142	-0.342421
ACVR1	YBL075C	1.34402	0.246127
ACVR1	YBL078C	1.1327	-0.387799
ACVR1	YBL079W	0.0436737	-0.981645
ACVR1	YBL080C	0.714276	-0.0511242
ACVR1	YBL081W	0.0633972	-1.01051
ACVR1	YBL082C	0.367704	-0.337345
ACVR1	YBL083C	0.364886	0.0433348
ACVR1	YBL085W	1.02985	-0.115557
ACVR1	YBL086C	1.25527	-0.0664943
ACVR1	YBL087C	0.00845297	-0.777701
ACVR1	YBL088C	0.63679	-0.17175
ACVR1	YBL089W	1.01295	0.156547
ACVR1	YBL090W	0.139474	-0.622236
ACVR1	YBL091C	0.922782	-0.107739
ACVR1	YBL094C	0.943915	0.364089
ACVR1	YBL095W	1.17496	-0.768004
ACVR1	YBL096C	1.36938	-0.0904538
ACVR1	YBL098W	1.61452	0.0352283
ACVR1	YBL099W	0.497316	0.544849
ACVR1	YBL100C	0.0662149	-0.648242
ACVR1	YBL101C	50.6051	3.13673
ACVR1	YBL102W	1.8033	0.165418
ACVR1	YBL104C	0.803032	-0.0979098
ACVR1	YBL106C	0.515631	0.0495708
ACVR1	YBL107C	2.09774	0.0826476
ACVR1	YBR001C	1.45673	-0.615507
ACVR1	YBR005W	1.34825	0.231188
ACVR1	YBR006W	0.866429	0.848411
ACVR1	YBR007C	1.1975	-0.650688
ACVR1	YBR008C	0.831208	-1.18574
ACVR1	YBR010W	0.433919	-0.743629
ACVR1	YBR012C	1.01576	-0.601738
ACVR1	YBR013C	2.09634	0.791133
ACVR1	YBR014C	0.555078	-0.589225
ACVR1	YBR015C	0.253589	-0.380282
ACVR1	YBR016W	2.29075	0.351053
ACVR1	YBR018C	2.25553	0.159471
ACVR1	YBR019C	0.266268	-0.556884
ACVR1	YBR020W	0.801623	-0.663345
ACVR1	YBR022W	1.66805	-0.0190658
ACVR1	YBR023C	0.049309	-1.08566
ACVR1	YBR024W	1.15101	0.0823958
ACVR1	YBR025C	0.102844	-1.0029
ACVR1	YBR027C	0.742452	0.717009
ACVR1	YBR028C	0.584664	-0.370534
ACVR1	YBR030W	0.371931	-0.49541
ACVR1	YBR031W	0.0112706	-0.874483
ACVR1	YBR032W	0.424057	-0.312206
ACVR1	YBR033W	1.83148	1.05611
ACVR1	YBR034C	0.91292	-0.550753
ACVR1	YBR035C	0.0253589	-0.58563
ACVR1	YBR037C	0.52831	0.237248
ACVR1	YBR040W	0.0126794	-1.0262
ACVR1	YBR041W	0.221186	-0.438025
ACVR1	YBR042C	0.752314	-0.0230657
ACVR1	YBR043C	1.18482	-0.396615
ACVR1	YBR044C	0.00140883	-0.61808
ACVR1	YBR045C	0.962229	-0.921166
ACVR1	YBR046C	2.26539	-0.125949
ACVR1	YBR047W	0.927009	-0.489724
ACVR1	YBR048W	0.032403	-0.363946
ACVR1	YBR050C	5.65785	0.970993
ACVR1	YBR051W	1.56943	-0.435417
ACVR1	YBR052C	1.39333	-0.309618
ACVR1	YBR053C	1.55957	0.363328
ACVR1	YBR054W	1.00872	-0.282419
ACVR1	YBR056W	0.0676237	-0.782439
ACVR1	YBR057C	1.30739	-0.0675283
ACVR1	YBR058C	1.76385	0.892551
ACVR1	YBR059C	4.25466	1.24599
ACVR1	YBR062C	1.26513	0.0911248
ACVR1	YBR063C	1.27922	-0.0781837
ACVR1	YBR064W	2.49644	0.174726
ACVR1	YBR065C	1.53703	-0.0698325
ACVR1	YBR066C	1.45673	-0.368918
ACVR1	YBR067C	1.0369	-0.108289
ACVR1	YBR068C	1.60184	0.0485686
ACVR1	YBR069C	0.801623	-0.00554197
ACVR1	YBR071W	2.0104	0.435415
ACVR1	YBR072W	2.1062	0.491173
ACVR1	YBR073W	0.652287	-0.246208
ACVR1	YBR074W	2.99235	0.53074
ACVR1	YBR075W	1.47927	0.300716
ACVR1	YBR077C	0.184556	-0.729824
ACVR1	YBR083W	2.00335	1.34433
ACVR1	YBR084W	1.59338	0.0343435
ACVR1	YBR090C-A	0.717093	-0.222773
ACVR1	YBR092C	0.928417	-0.0843143
ACVR1	YBR093C	0.779082	-0.325649
ACVR1	YBR094W	0.353616	-0.546838
ACVR1	YBR098W	0.231048	-0.335126
ACVR1	YBR099C	0.0774855	-0.269057
ACVR1	YBR100W	0.790352	0.356877
ACVR1	YBR101C	0.587481	-0.320983
ACVR1	YBR103W	0.121159	-0.520382
ACVR1	YBR104W	0.549443	-0.632339
ACVR1	YBR105C	1.03971	0.158374
ACVR1	YBR106W	0.00140883	-0.688326
ACVR1	YBR107C	0.357842	-0.11034
ACVR1	YBR113W	0.0479001	-1.00303
ACVR1	YBR116C	0.481819	-0.282952
ACVR1	YBR119W	0.126794	-0.741337
ACVR1	YBR120C	1.57789	0.138996
ACVR1	YBR128C	1.08761	0.0873098
ACVR1	YBR129C	0.762176	0.186839
ACVR1	YBR130C	0.273313	-0.852309
ACVR1	YBR131W	0.147927	-0.882309
ACVR1	YBR133C	0.0183148	-0.707107
ACVR1	YBR134W	0.267677	0.141297
ACVR1	YBR137W	0.66074	-0.676552
ACVR1	YBR138C	0.896014	-0.0547566
ACVR1	YBR139W	1.31866	-0.154989
ACVR1	YBR141C	1.2609	-0.0564785
ACVR1	YBR144C	0.371931	-0.516195
ACVR1	YBR145W	0.652287	-0.482328
ACVR1	YBR146W	0.0295854	-0.339555
ACVR1	YBR147W	2.55984	0.176387
ACVR1	YBR148W	2.1541	0.227045
ACVR1	YBR150C	0.440963	-0.309065
ACVR1	YBR151W	0.714276	-0.466213
ACVR1	YBR157C	0.767811	-0.0241503
ACVR1	YBR158W	0.417013	-0.00476052
ACVR1	YBR159W	0.00422648	-0.921382
ACVR1	YBR161W	0.591708	-0.29126
ACVR1	YBR162W-A	1.07353	0.226882
ACVR1	YBR163W	0.1437	-0.399925
ACVR1	YBR164C	0.762176	-0.0909931
ACVR1	YBR169C	1.65115	0.0146495
ACVR1	YBR170C	0.462095	-0.433867
ACVR1	YBR172C	1.28626	0.0849405
ACVR1	YBR174C	0.166242	-0.390111
ACVR1	YBR175W	0.270495	0.105703
ACVR1	YBR176W	0.438145	-0.467067
ACVR1	YBR177C	1.22568	0.66373
ACVR1	YBR178W	0.815711	0.330059
ACVR1	YBR179C	0.049309	-1.24746
ACVR1	YBR180W	0.663558	0.403584
ACVR1	YBR182C	0.448007	-0.119782
ACVR1	YBR183W	0.894606	-0.335377
ACVR1	YBR184W	0.631155	-0.153843
ACVR1	YBR185C	1.72159	0.0632586
ACVR1	YBR186W	0.800214	-0.017604
ACVR1	YBR187W	0.00140883	-0.645715
ACVR1	YBR188C	0.367704	-0.364494
ACVR1	YBR195C	0.0253589	-0.662443
ACVR1	YBR197C	0.948141	0.326087
ACVR1	YBR199W	0.934053	-0.175758
ACVR1	YBR203W	0.555078	-1.0571
ACVR1	YBR204C	1.25527	-0.299232
ACVR1	YBR205W	2.42037	0.499281
ACVR1	YBR206W	1.30317	-0.498253
ACVR1	YBR207W	1.14819	-0.0267574
ACVR1	YBR208C	0.90165	-0.0750359
ACVR1	YBR210W	0.0521266	-0.843128
ACVR1	YBR212W	1.90474	0.991797
ACVR1	YBR214W	0.40856	-0.500365
ACVR1	YBR215W	0.0380383	-0.949538
ACVR1	YBR216C	1.61593	0.184154
ACVR1	YBR217W	0.69737	-0.685234
ACVR1	YBR218C	1.12706	-0.444298
ACVR1	YBR219C	0.555078	-0.601655
ACVR1	YBR220C	0.81712	-0.989168
ACVR1	YBR221C	0.152153	-0.641261
ACVR1	YBR222C	1.0369	0.111487
ACVR1	YBR223C	0.784717	-0.0352266
ACVR1	YBR224W	0.733999	-0.542734
ACVR1	YBR225W	0.828391	-0.201231
ACVR1	YBR226C	1.53985	-0.320122
ACVR1	YBR227C	1.85824	0.408983
ACVR1	YBR228W	2.29075	0.484084
ACVR1	YBR229C	3.01348	0.63103
ACVR1	YBR230C	3.01207	0.14746
ACVR1	YBR231C	0.722729	0.142832
ACVR1	YBR232C	1.58211	-0.211996
ACVR1	YBR233W	1.16228	0.410591
ACVR1	YBR235W	0.762176	-0.120602
ACVR1	YBR238C	0.474775	-0.895487
ACVR1	YBR239C	1.27922	-0.223855
ACVR1	YBR240C	1.95827	0.205286
ACVR1	YBR241C	1.30176	-0.490978
ACVR1	YBR242W	0.934053	-0.418678
ACVR1	YBR244W	5.76774	0.130916
ACVR1	YBR245C	1.20314	-0.247866
ACVR1	YBR246W	1.01295	-0.241321
ACVR1	YBR248C	1.57789	0.173693
ACVR1	YBR249C	0.414195	-0.408907
ACVR1	YBR250W	2.17664	0.258642
ACVR1	YBR251W	0.0239501	-0.81487
ACVR1	YBR255W	0.990406	-0.0635899
ACVR1	YBR258C	1.28908	-0.00312373
ACVR1	YBR259W	1.73849	-0.264681
ACVR1	YBR260C	1.87797	0.556367
ACVR1	YBR261C	0.779082	-0.668019
ACVR1	YBR262C	2.04844	0.215309
ACVR1	YBR263W	1.723	0.0551337
ACVR1	YBR264C	1.11016	-0.165955
ACVR1	YCL001W	0.632564	0.0931192
ACVR1	YCL005W	0.149336	-0.498969
ACVR1	YCL006C	2.84161	-0.54863
ACVR1	YCL008C	1.1172	0.563049
ACVR1	YCL009C	0.425466	-0.204952
ACVR1	YCL010C	0.188783	-0.340232
ACVR1	YCL011C	0.166242	-0.603994
ACVR1	YCL012W	1.17919	-0.253626
ACVR1	YCL013W	0.748088	-0.296848
ACVR1	YCL014W	0.139474	-0.885214
ACVR1	YCL022C	1.94559	0.256669
ACVR1	YCL023C	4.52234	-0.299409
ACVR1	YCL024W	0.0915738	-1.156
ACVR1	YCL026C	0.924191	0.235352
ACVR1	YCL027W	0.422648	-0.535716
ACVR1	YCL028W	0.239501	-0.530901
ACVR1	YCL033C	0.690326	-0.0626426
ACVR1	YCL035C	1.21723	1.44516
ACVR1	YCL036W	0.0197236	-0.783406
ACVR1	YCL037C	0.277539	0.026529
ACVR1	YCL038C	2.74581	0.255288
ACVR1	YCL039W	0.429692	-0.362799
ACVR1	YCL044C	0.495907	0.0742217
ACVR1	YCL045C	0.75654	-0.156974
ACVR1	YCL046W	0.483228	-0.101654
ACVR1	YCL047C	0.417013	-0.123482
ACVR1	YCL048W	0.350798	-0.173882
ACVR1	YCL049C	0.638199	-0.597652
ACVR1	YCL050C	0.927009	0.647902
ACVR1	YCL051W	0.586072	-0.0391131
ACVR1	YCL055W	0.00281766	-0.992058
ACVR1	YCL056C	0.891788	0.290614
ACVR1	YCL057W	0.464913	-0.270157
ACVR1	YCL061C	0.0521266	-0.707475
ACVR1	YCL062W	0.293036	-0.77539
ACVR1	YCL063W	0.00140883	-1.00312
ACVR1	YCL064C	0.511404	-0.309076
ACVR1	YCL069W	0.980544	0.134488
ACVR1	YCL073C	2.76412	1.00608
ACVR1	YCL074W	3.54038	0.873191
ACVR1	YCL075W	5.22675	0.100809
ACVR1	YCL076W	2.40628	-0.592651
ACVR1	YCR001W	0.00281766	-0.594724
ACVR1	YCR004C	0.332483	-0.546416
ACVR1	YCR005C	0.767811	-0.200855
ACVR1	YCR006C	0.339527	-0.431689
ACVR1	YCR007C	0.138065	-0.470534
ACVR1	YCR008W	0.412787	-0.471392
ACVR1	YCR010C	0.84107	0.0728579
ACVR1	YCR011C	0.402925	-0.543961
ACVR1	YCR014C	0.00140883	-0.955861
ACVR1	YCR015C	0.704414	-0.272975
ACVR1	YCR016W	0.453643	-0.139029
ACVR1	YCR017C	0.107071	-0.738732
ACVR1	YCR018C	1.91741	-0.160009
ACVR1	YCR019W	1.55112	0.101474
ACVR1	YCR020C	0.391654	0.0739248
ACVR1	YCR020C-A	0.242318	-0.228093
ACVR1	YCR021C	1.27358	-0.0312322
ACVR1	YCR022C	0.560713	-0.0958919
ACVR1	YCR023C	1.18482	0.609101
ACVR1	YDL001W	0.178921	-0.241693
ACVR1	YDL002C	0.0591708	-0.708633
ACVR1	YDL009C	0.776264	0.0548626
ACVR1	YDL010W	0.333892	-0.0640249
ACVR1	YDL011C	0.55226	0.0207807
ACVR1	YDL012C	3.80947	3.22812
ACVR1	YDL018C	1.02985	0.415819
ACVR1	YDL019C	0.0239501	-0.996565
ACVR1	YDL020C	0.00281766	-1.10845
ACVR1	YDL021W	0.707232	0.461981
ACVR1	YDL022W	0.0577619	-0.839789
ACVR1	YDL023C	0.245136	-0.445669
ACVR1	YDL024C	0.440963	-0.452794
ACVR1	YDL025C	0.32403	0.162249
ACVR1	YDL026W	0.852341	0.066893
ACVR1	YDL027C	0.440963	-0.160995
ACVR1	YDL032W	0.0352207	-0.784272
ACVR1	YDL034W	0.659331	-0.560621
ACVR1	YDL035C	0.346572	-0.549978
ACVR1	YDL036C	0.941097	-0.229378
ACVR1	YDL037C	0.0704414	-0.678894
ACVR1	YDL038C	0.370522	-0.460221
ACVR1	YDL039C	1.43137	-0.146066
ACVR1	YDL040C	0.0549443	-0.438478
ACVR1	YDL041W	0.308533	0.772797
ACVR1	YDL046W	0.32403	-0.325425
ACVR1	YDL048C	0.169059	-0.553667
ACVR1	YDL049C	0.45646	-0.524112
ACVR1	YDL050C	0.270495	-0.119246
ACVR1	YDL051W	0.455051	-0.433355
ACVR1	YDL052C	0.405742	-0.600131
ACVR1	YDL053C	0.294445	-0.709131
ACVR1	YDL056W	0.112706	-0.441728
ACVR1	YDL059C	0.0845297	-0.298625
ACVR1	YDL061C	1.55675	3.58941
ACVR1	YDL062W	0.0915738	-0.355601
ACVR1	YDL063C	0.0535355	-0.734443
ACVR1	YDL065C	0.260633	-0.422785
ACVR1	YDL066W	0.00281766	-0.740499
ACVR1	YDL067C	0.395881	-0.134152
ACVR1	YDL068W	0.280357	0.12167
ACVR1	YDL069C	0.338119	-0.387666
ACVR1	YDL070W	0.463504	-0.0750736
ACVR1	YDL071C	0.49309	-0.256541
ACVR1	YDL072C	1.21159	1.60954
ACVR1	YDL073W	0.00563531	-0.585562
ACVR1	YDL074C	0.207098	-0.17656
ACVR1	YDL076C	0.355025	-0.212999
ACVR1	YDL077C	0.446598	-0.0952438
ACVR1	YDL078C	1.15383	0.39423
ACVR1	YDL079C	1.14115	0.181715
ACVR1	YDL080C	0.0690326	-0.960351
ACVR1	YDL082W	0.0450825	-0.618498
ACVR1	YDL085W	0.154971	-0.692865
ACVR1	YDL086W	0.614249	-0.296713
ACVR1	YDL088C	0.136656	-0.605371
ACVR1	YDL089W	0.198645	-0.528621
ACVR1	YDL091C	0.366295	-0.341135
ACVR1	YDL093W	0.891788	-0.33835
ACVR1	YDL094C	0.505769	-0.172816
ACVR1	YDL095W	0.473366	0.269322
ACVR1	YDL096C	1.48068	1.54968
ACVR1	YDL099W	0.51704	0.0104858
ACVR1	YDL100C	0.339527	-0.0722659
ACVR1	YDL101C	0.150745	-0.596363
ACVR1	YDL104C	1.72722	0.0316273
ACVR1	YDL106C	0.0746679	-0.307462
ACVR1	YDL107W	0.225412	-0.0262378
ACVR1	YDL109C	2.40346	0.0093047
ACVR1	YDL110C	0.733999	-0.509219
ACVR1	YDL112W	2.2344	0.107504
ACVR1	YDL113C	1.84275	-0.546555
ACVR1	YDL114W	0.866429	-1.17091
ACVR1	YDL117W	0.0338119	-0.830889
ACVR1	YDL118W	1.48209	0.469938
ACVR1	YDL121C	1.98645	0.21219
ACVR1	YDL122W	0.917147	-0.12573
ACVR1	YDL123W	0.536763	-0.865186
ACVR1	YDL124W	0.629746	-0.671315
ACVR1	YDL125C	0.579028	-0.00455975
ACVR1	YDL127W	0.786126	0.0646886
ACVR1	YDL129W	1.51026	-0.322175
ACVR1	YDL130W	0.0535355	-0.685737
ACVR1	YDL131W	1.07916	-0.182631
ACVR1	YDL133W	0.910103	0.0836567
ACVR1	YDL134C	0.398698	-0.959163
ACVR1	YDL134C-A	2.59506	1.0055
ACVR1	YDL135C	1.20173	-0.200322
ACVR1	YDL136W	0.411378	-0.394352
ACVR1	YDL137W	3.2234	-0.386541
ACVR1	YDL138W	3.50516	-0.579016
ACVR1	YDL142C	2.72749	-0.699325
ACVR1	YDL146W	0.919964	-0.307969
ACVR1	YDL149W	2.04703	-0.237543
ACVR1	YDL154W	11.0917	1.22213
ACVR1	YDL155W	3.25721	-0.950803
ACVR1	YDL156W	8.91084	0.9152
ACVR1	YDL157C	3.97994	0.396511
ACVR1	YDL161W	3.82074	-0.302961
ACVR1	YDL162C	0.269086	-0.611373
ACVR1	YDL167C	4.99429	0.192432
ACVR1	YDL168W	2.33725	-0.783982
ACVR1	YDL169C	2.80216	-0.379184
ACVR1	YDL170W	3.5263	-0.45968
ACVR1	YDL171C	4.67872	0.200445
ACVR1	YDL172C	1.02422	0.291494
ACVR1	YDL173W	0.43251	-0.472456
ACVR1	YDL174C	5.56064	-0.132549
ACVR1	YDL176W	8.47551	-0.26129
ACVR1	YDL177C	5.54233	-0.475515
ACVR1	YDL178W	2.5528	-0.787889
ACVR1	YDL179W	2.52462	-0.445225
ACVR1	YDL180W	7.33154	-0.285631
ACVR1	YDL182W	5.68321	-0.017022
ACVR1	YDL183C	0.898832	-0.623434
ACVR1	YDL184C	3.84892	-0.516039
ACVR1	YDL186W	3.76439	-0.32198
ACVR1	YDL187C	4.13068	-0.414903
ACVR1	YDL188C	0.373339	-1.35013
ACVR1	YDL189W	5.03233	0.505808
ACVR1	YDL190C	1.48772	-0.488197
ACVR1	YDL192W	0.111297	-0.302865
ACVR1	YDL194W	0.115524	-0.488384
ACVR1	YDL197C	1.55816	0.389886
ACVR1	YDL198C	0.0352207	0.707107
ACVR1	YDL199C	3.23185	0.709213
ACVR1	YDL200C	6.77646	1.57779
ACVR1	YDL201W	2.87683	0.569069
ACVR1	YDL202W	0.0774855	-0.583788
ACVR1	YDL203C	1.98504	-0.760336
ACVR1	YDL204W	1.94982	-0.732917
ACVR1	YDL206W	2.26399	-0.429197
ACVR1	YDL210W	1.38065	-1.06669
ACVR1	YDL211C	2.30202	1.7058
ACVR1	YDL213C	0.0295854	-0.855908
ACVR1	YDL215C	3.5911	0.301427
ACVR1	YDL216C	0.00704414	-0.828001
ACVR1	YDL218W	3.18959	0.0948755
ACVR1	YDL219W	2.52039	0.290685
ACVR1	YDL222C	4.25889	-0.472277
ACVR1	YDL223C	1.22145	-0.491313
ACVR1	YDL224C	1.03126	-0.971852
ACVR1	YDL225W	1.37924	-0.0771137
ACVR1	YDL226C	0.753723	-0.0576483
ACVR1	YDL227C	4.11237	-0.185786
ACVR1	YDL229W	0.0774855	-1.29674
ACVR1	YDL230W	3.13887	0.227556
ACVR1	YDL231C	3.68831	0.391814
ACVR1	YDL233W	2.85428	-0.396509
ACVR1	YDL234C	1.07634	-0.422508
ACVR1	YDL236W	6.54823	1.41404
ACVR1	YDL237W	1.8836	0.453539
ACVR1	YDL238C	0.1437	-1.45812
ACVR1	YDL239C	1.39333	-0.443762
ACVR1	YDL240W	1.07916	-0.714686
ACVR1	YDL241W	1.6117	0.268511
ACVR1	YDL242W	2.67677	-0.296624
ACVR1	YDL243C	2.34992	-0.179838
ACVR1	YDR001C	1.58916	-0.522804
ACVR1	YDR003W	1.08057	-0.72578
ACVR1	YDR004W	0.0338119	-0.650026
ACVR1	YDR005C	0.849523	0.081917
ACVR1	YDR006C	3.61083	-0.294134
ACVR1	YDR007W	0.0253589	-0.658824
ACVR1	YDR009W	3.37414	0.104189
ACVR1	YDR010C	2.65	-0.11242
ACVR1	YDR011W	2.12169	-0.0991985
ACVR1	YDR014W	0.691734	0.0588281
ACVR1	YDR015C	1.50463	-0.0735435
ACVR1	YDR018C	2.68523	0.331523
ACVR1	YDR019C	2.69086	-0.410188
ACVR1	YDR020C	0.30008	-0.194295
ACVR1	YDR022C	3.37132	0.0530567
ACVR1	YDR026C	3.7348	0.746627
ACVR1	YDR028C	4.74071	1.63563
ACVR1	YDR029W	3.34033	-0.0214044
ACVR1	YDR030C	2.54293	-0.307017
ACVR1	YDR031W	2.13578	-0.473542
ACVR1	YDR032C	1.4835	-0.0605575
ACVR1	YDR033W	4.48571	1.70049
ACVR1	YDR034C	0.118342	-0.856895
ACVR1	YDR035W	3.92218	0.521201
ACVR1	YDR036C	0.910103	-0.830046
ACVR1	YDR042C	2.31611	-0.0255184
ACVR1	YDR043C	1.87515	0.252792
ACVR1	YDR046C	2.30484	-0.477222
ACVR1	YDR048C	0.545216	-0.0866601
ACVR1	YDR049W	0.322622	0.00691988
ACVR1	YDR051C	0.459278	-1.06924
ACVR1	YDR055W	0.842479	-0.0131381
ACVR1	YDR056C	3.51362	1.60952
ACVR1	YDR057W	0.153562	-0.872767
ACVR1	YDR059C	2.20763	0.650702
ACVR1	YDR061W	0.700187	-0.810567
ACVR1	YDR063W	0.497316	-0.893724
ACVR1	YDR066C	1.69482	-0.112942
ACVR1	YDR067C	7.99791	1.23083
ACVR1	YDR068W	1.56943	-0.262592
ACVR1	YDR069C	0.0422648	-0.515791
ACVR1	YDR070C	0.0648061	-0.921555
ACVR1	YDR072C	0.831208	0.424749
ACVR1	YDR073W	0.842479	-0.925113
ACVR1	YDR075W	0.655105	0.209218
ACVR1	YDR076W	0.00845297	-0.8415
ACVR1	YDR077W	0.64947	-0.59935
ACVR1	YDR078C	0.965047	0.44315
ACVR1	YDR080W	0.770629	-0.12471
ACVR1	YDR084C	0.548034	-0.482102
ACVR1	YDR085C	0.729773	-0.656884
ACVR1	YDR089W	2.36542	-0.540238
ACVR1	YDR090C	1.76526	0.0608197
ACVR1	YDR093W	0.343754	-0.759418
ACVR1	YDR094W	1.41165	0.0183271
ACVR1	YDR095C	1.3877	-0.355657
ACVR1	YDR096W	0.652287	-0.682122
ACVR1	YDR097C	1.67791	-0.0349474
ACVR1	YDR098C	1.01436	-0.0415355
ACVR1	YDR099W	1.13974	-0.143112
ACVR1	YDR100W	0.211324	-1.06994
ACVR1	YDR101C	0.0295854	-0.836445
ACVR1	YDR102C	0.741043	-0.273826
ACVR1	YDR104C	1.09325	-0.155609
ACVR1	YDR107C	1.0848	-0.541504
ACVR1	YDR108W	0.753723	-0.43062
ACVR1	YDR109C	1.0059	-0.137647
ACVR1	YDR110W	1.26935	0.0615617
ACVR1	YDR111C	0.58889	-0.356087
ACVR1	YDR112W	1.83007	-0.238852
ACVR1	YDR115W	0.0422648	-0.441196
ACVR1	YDR116C	0.0605796	-0.63966
ACVR1	YDR117C	0.691734	-0.317592
ACVR1	YDR119W	1.78358	-0.388095
ACVR1	YDR120C	0.0972091	-0.324354
ACVR1	YDR121W	0.440963	-0.320829
ACVR1	YDR122W	3.05997	0.692844
ACVR1	YDR123C	4.11378	0.790282
ACVR1	YDR124W	1.72441	-0.322138
ACVR1	YDR125C	0.0605796	-0.442636
ACVR1	YDR128W	0.794579	-0.525402
ACVR1	YDR130C	0.88897	-0.348135
ACVR1	YDR131C	1.23977	0.129456
ACVR1	YDR132C	0.34798	-0.699172
ACVR1	YDR133C	0.977726	-0.750758
ACVR1	YDR134C	1.8188	-0.550185
ACVR1	YDR135C	1.05521	-0.259176
ACVR1	YDR136C	0.118342	-0.972881
ACVR1	YDR139C	1.29753	0.0547444
ACVR1	YDR142C	0.0619884	-1.12385
ACVR1	YDR143C	3.15718	1.64886
ACVR1	YDR144C	0.934053	-0.129172
ACVR1	YDR146C	2.04984	0.335537
ACVR1	YDR148C	0.600161	-0.313772
ACVR1	YDR149C	0.0972091	-0.165056
ACVR1	YDR150W	0.166242	0.191242
ACVR1	YDR151C	0.845297	-0.0685074
ACVR1	YDR152W	1.15524	-0.204934
ACVR1	YDR153C	1.75822	-0.471307
ACVR1	YDR154C	0.543807	0.401693
ACVR1	YDR155C	0.0295854	-0.683218
ACVR1	YDR156W	0.0746679	-0.442456
ACVR1	YDR157W	0.370522	-0.49504
ACVR1	YDR162C	0.412787	-0.45778
ACVR1	YDR163W	0.00422648	-1.04635
ACVR1	YDR169C	1.36375	0.408346
ACVR1	YDR171W	1.17496	-0.817504
ACVR1	YDR178W	0.509996	-0.361507
ACVR1	YDR179W-A	0.00422648	-0.953327
ACVR1	YDR181C	0.34798	-0.697253
ACVR1	YDR183W	0.67342	0.202407
ACVR1	YDR184C	0.0887561	-1.03887
ACVR1	YDR185C	0.505769	-0.488469
ACVR1	YDR186C	1.10875	2.4599
ACVR1	YDR191W	0.928417	-0.454147
ACVR1	YDR192C	1.46095	0.525825
ACVR1	YDR193W	0.524084	-0.451089
ACVR1	YDR194C	0.245136	-0.114396
ACVR1	YDR197W	0.205689	-0.65601
ACVR1	YDR198C	0.629746	-0.10284
ACVR1	YDR202C	0.281766	-0.797781
ACVR1	YDR203W	0.222595	-0.39293
ACVR1	YDR204W	0.401516	0.653285
ACVR1	YDR205W	1.52858	-0.316455
ACVR1	YDR206W	0.824164	0.210288
ACVR1	YDR209C	0.133839	-0.883346
ACVR1	YDR210W	1.67932	0.167802
ACVR1	YDR213W	0.0507178	-1.05913
ACVR1	YDR214W	0.856567	-0.461271
ACVR1	YDR215C	0.00986179	-0.598929
ACVR1	YDR216W	0.628337	-0.304864
ACVR1	YDR217C	0.55226	0.3133
ACVR1	YDR218C	0.695961	0.112814
ACVR1	YDR219C	0.621293	-0.194048
ACVR1	YDR220C	0.535355	-0.130492
ACVR1	YDR221W	0.470548	-0.763931
ACVR1	YDR222W	0.545216	-0.231415
ACVR1	YDR223W	1.37361	0.149906
ACVR1	YDR225W	0.100027	-0.454248
ACVR1	YDR229W	1.60184	0.774161
ACVR1	YDR230W	0.383201	-0.261568
ACVR1	YDR231C	0.462095	-0.199017
ACVR1	YDR233C	1.57084	0.0573079
ACVR1	YDR237W	0.0788944	-0.652096
ACVR1	YDR239C	1.32852	0.0357198
ACVR1	YDR244W	0.548034	-0.407624
ACVR1	YDR247W	0.736817	-0.260583
ACVR1	YDR248C	0.919964	0.472034
ACVR1	YDR249C	0.815711	0.338445
ACVR1	YDR250C	0.91292	0.607952
ACVR1	YDR251W	0.79317	-0.180793
ACVR1	YDR252W	0.852341	0.0305474
ACVR1	YDR253C	0.463504	-0.0694626
ACVR1	YDR254W	0.15638	-0.439417
ACVR1	YDR255C	0.0464913	-0.299755
ACVR1	YDR256C	1.02844	0.115738
ACVR1	YDR257C	0.325439	-0.810193
ACVR1	YDR258C	2.79652	2.40381
ACVR1	YDR259C	0.621293	-0.445592
ACVR1	YDR260C	0.193009	-0.41594
ACVR1	YDR261C	0.190192	-1.06498
ACVR1	YDR262W	0.122568	-0.435799
ACVR1	YDR263C	1.21582	0.106816
ACVR1	YDR265W	0.256407	-0.671212
ACVR1	YDR266C	0.187374	-0.24713
ACVR1	YDR269C	1.13692	-0.959797
ACVR1	YDR270W	0.00140883	-0.61037
ACVR1	YDR271C	0.121159	-1.03103
ACVR1	YDR272W	0.316986	-0.878567
ACVR1	YDR273W	0.679055	-0.409385
ACVR1	YDR274C	0.216959	-0.281454
ACVR1	YDR275W	0.357842	-0.488215
ACVR1	YDR276C	0.197236	-0.167568
ACVR1	YDR277C	0.352207	0.346019
ACVR1	YDR278C	0.0887561	-0.913301
ACVR1	YDR279W	0.187374	-0.145966
ACVR1	YDR282C	0.133839	-0.619933
ACVR1	YDR283C	0.0943915	-0.0142615
ACVR1	YDR284C	0.0859385	-0.550801
ACVR1	YDR285W	0.00422648	-0.376126
ACVR1	YDR286C	0.608614	0.0770375
ACVR1	YDR287W	0.081712	-0.861585
ACVR1	YDR289C	0.0648061	-0.475827
ACVR1	YDR290W	3.5263	2.01464
ACVR1	YDR291W	0.267677	-0.723643
ACVR1	YDR293C	0.145109	0.15252
ACVR1	YDR294C	0.43251	-0.479844
ACVR1	YDR295C	0.339527	-0.26902
ACVR1	YDR296W	0.0633972	0.707107
ACVR1	YDR297W	1.96813	0.185445
ACVR1	YDR304C	0.452234	-0.34516
ACVR1	YDR305C	0.353616	-0.224834
ACVR1	YDR306C	0.378975	0.120292
ACVR1	YDR307W	0.56494	0.0165028
ACVR1	YDR309C	0.262042	-0.792201
ACVR1	YDR310C	0.566349	0.521198
ACVR1	YDR312W	0.494499	-0.135425
ACVR1	YDR313C	0.532537	-0.138266
ACVR1	YDR314C	0.593116	-0.297888
ACVR1	YDR316W	0.225412	-0.449525
ACVR1	YDR317W	0.31276	-0.15555
ACVR1	YDR319C	0.501543	-0.118328
ACVR1	YDR321W	0.194418	-0.800472
ACVR1	YDR322W	0.281766	0.418037
ACVR1	YDR323C	0.00563531	-0.920105
ACVR1	YDR326C	1.84697	0.982345
ACVR1	YDR329C	0.183148	-0.667933
ACVR1	YDR330W	0.150745	-0.407251
ACVR1	YDR332W	0.136656	-0.477876
ACVR1	YDR333C	0.307124	-0.563505
ACVR1	YDR334W	0.245136	0.588529
ACVR1	YDR335W	0.0126794	-0.661015
ACVR1	YDR336W	0.0929826	-0.585791
ACVR1	YDR337W	0.0521266	-0.561282
ACVR1	YEL001C	1.47082	0.257789
ACVR1	YEL003W	0.00140883	-0.60174
ACVR1	YEL004W	0.781899	-0.51296
ACVR1	YEL005C	0.154971	-0.761817
ACVR1	YEL006W	0.559305	0.169879
ACVR1	YEL008W	0.0309942	-1.06049
ACVR1	YEL009C	0.805849	-0.0926744
ACVR1	YEL010W	1.1806	-0.0798596
ACVR1	YEL011W	2.19073	0.210851
ACVR1	YEL012W	1.94841	0.387359
ACVR1	YEL013W	1.33134	0.224622
ACVR1	YEL014C	0.69737	-0.572452
ACVR1	YEL015W	0.0338119	-1.16499
ACVR1	YEL016C	1.36797	0.119049
ACVR1	YEL017C-A	0.712867	-0.0977479
ACVR1	YEL017W	0.250771	-0.427742
ACVR1	YEL018W	0.471957	-0.246758
ACVR1	YEL020C	0.236683	-0.569601
ACVR1	YEL023C	0.536763	-0.446193
ACVR1	YEL024W	0.00140883	-0.69483
ACVR1	YEL025C	0.893197	-0.336507
ACVR1	YEL028W	1.46095	-0.35036
ACVR1	YEL030W	1.34543	0.489037
ACVR1	YEL031W	0.188783	-0.0801555
ACVR1	YEL037C	0.695961	-0.0301731
ACVR1	YEL038W	1.15242	-0.0206268
ACVR1	YEL039C	0.965047	0.730442
ACVR1	YEL040W	1.86388	0.431114
ACVR1	YEL041W	2.11465	-0.0338668
ACVR1	YEL042W	1.88783	1.08757
ACVR1	YEL043W	0.508587	-0.577064
ACVR1	YEL047C	2.33584	-0.264492
ACVR1	YEL048C	1.95545	0.0476086
ACVR1	YEL049W	2.75848	0.684981
ACVR1	YEL050C	0.109889	-0.684605
ACVR1	YEL052W	1.05944	-0.860986
ACVR1	YEL053C	1.4849	0.311249
ACVR1	YEL054C	0.0267677	-0.805525
ACVR1	YEL056W	1.35952	0.0434334
ACVR1	YEL057C	1.8357	0.763227
ACVR1	YEL059W	1.23554	-0.52043
ACVR1	YEL060C	0.438145	-0.398442
ACVR1	YEL061C	0.0126794	-0.605293
ACVR1	YEL062W	3.25017	1.23677
ACVR1	YEL063C	1.06648	-0.216794
ACVR1	YEL064C	0.0479001	-0.614642
ACVR1	YEL065W	1.15524	-0.408297
ACVR1	YEL066W	1.50463	0.0431267
ACVR1	YEL067C	1.83429	-0.577728
ACVR1	YEL068C	2.18368	-0.0894067
ACVR1	YEL071W	1.16651	-0.745014
ACVR1	YER001W	1.86388	0.0424823
ACVR1	YER002W	0.226821	-0.302776
ACVR1	YER004W	0.309942	-0.54376
ACVR1	YER005W	1.43982	0.890295
ACVR1	YER007C-A	0.848114	-0.141116
ACVR1	YER007W	0.0662149	-0.750305
ACVR1	YER011W	1.17214	0.634216
ACVR1	YER019C-A	1.692	0.305589
ACVR1	YER020W	2.4894	0.626167
ACVR1	YER024W	1.27499	-0.250493
ACVR1	YER028C	1.35247	-0.159548
ACVR1	YER030W	0.783308	-0.835622
ACVR1	YER031C	0.735408	-0.112416
ACVR1	YER032W	0.494499	-0.196735
ACVR1	YER033C	1.0848	1.453
ACVR1	YER034W	0.928417	-0.0600958
ACVR1	YER038W-A	1.25527	0.230682
ACVR1	YER039C	0.0859385	-0.728243
ACVR1	YER040W	0.0507178	-0.503195
ACVR1	YER041W	0.977726	1.43919
ACVR1	YER042W	1.1496	0.182966
ACVR1	YER044C-A	1.12988	-0.736731
ACVR1	YER045C	1.44405	0.0229531
ACVR1	YER046W	3.2558	0.0367308
ACVR1	YER046W-A	0.532537	0.0306549
ACVR1	YER048C	0.996041	0.460504
ACVR1	YER049W	0.980544	-0.384789
ACVR1	YER051W	0.00281766	-0.766774
ACVR1	YER053C	0.959412	-0.0373096
ACVR1	YER055C	1.06085	-0.503161
ACVR1	YER056C	1.08761	-0.134045
ACVR1	YER056C-A	0.622702	-0.181115
ACVR1	YER057C	1.6286	-0.21174
ACVR1	YER058W	0.536763	0.167833
ACVR1	YER059W	2.10902	-0.128129
ACVR1	YER060W	1.73708	-0.203853
ACVR1	YER060W-A	0.407151	-0.948022
ACVR1	YER062C	0.591708	-0.254495
ACVR1	YER063W	2.93459	0.88381
ACVR1	YER064C	2.1865	0.280321
ACVR1	YER065C	0.484637	-0.906501
ACVR1	YER066W	2.93459	1.38071
ACVR1	YER067C-A	1.3567	-0.170323
ACVR1	YER067W	1.36797	0.127204
ACVR1	YER071C	1.00168	-0.352112
ACVR1	YER072W	0.494499	-0.315243
ACVR1	YER073W	2.66973	0.526204
ACVR1	YER074W	0.00140883	-1.08358
ACVR1	YER075C	0.922782	-0.433947
ACVR1	YER078C	0.556487	-0.28752
ACVR1	YER079W	0.966456	-0.214081
ACVR1	YER080W	0.772038	-0.440238
ACVR1	YER081W	1.42714	0.464685
ACVR1	YER084W	0.333892	-0.142199
ACVR1	YER085C	1.20314	-0.221888
ACVR1	YER087C-A	1.11016	-0.0573797
ACVR1	YER088C	1.00168	0.374927
ACVR1	YER089C	1.2764	0.253529
ACVR1	YER092W	0.233865	-0.351861
ACVR1	YER093C-A	1.5793	-0.0594806
ACVR1	YER096W	1.85402	-0.0838246
ACVR1	YER097W	0.208507	-1.00205
ACVR1	YER098W	5.61418	1.61446
ACVR1	YER101C	0.494499	0.381112
ACVR1	YER103W	1.18905	0.829244
ACVR1	YER106W	1.01858	-0.298306
ACVR1	YER108C	1.34684	1.5761
ACVR1	YER109C	0.839661	-0.484128
ACVR1	YER110C	0.0253589	-0.939694
ACVR1	YER113C	0.70864	0.21776
ACVR1	YER114C	0.646652	0.167429
ACVR1	YER115C	1.32148	0.19025
ACVR1	YER118C	0.74527	0.306291
ACVR1	YER119C	0.298671	-0.673257
ACVR1	YER119C-A	0.24091	-0.258428
ACVR1	YER120W	0.686099	1.08703
ACVR1	YER121W	0.580437	-0.39372
ACVR1	YER123W	0.838252	0.180274
ACVR1	YER124C	0.922782	-0.0260956
ACVR1	YER128W	0.996041	-0.174678
ACVR1	YER129W	1.04676	0.313629
ACVR1	YER130C	0.46914	0.264799
ACVR1	YER131W	0.0394472	-0.799604
ACVR1	YER132C	0.93687	-0.275872
ACVR1	YER134C	0.600161	-0.327544
ACVR1	YER135C	0.121159	-0.536224
ACVR1	YER137C	0.484637	-0.288221
ACVR1	YER138C-A	0.583255	-0.122093
ACVR1	YER139C	0.459278	0.268754
ACVR1	YER140W	1.48913	-0.120054
ACVR1	YER141W	0.755132	-0.340595
ACVR1	YER142C	1.00872	0.679102
ACVR1	YER145C-A	0.860794	0.847664
ACVR1	YER146W	0.76922	0.119718
ACVR1	YER148W	0.626928	-0.441803
ACVR1	YER148W-A	0.139474	0.0499566
ACVR1	YER151C	0.0831208	-1.03075
ACVR1	YER153C	0.641017	-0.453224
ACVR1	YER155C	0.342345	-0.347625
ACVR1	YER156C	0.781899	0.508167
ACVR1	YER157W	0.993224	-0.125249
ACVR1	YER158C	1.3722	0.233128
ACVR1	YER160C	1.61452	-0.058411
ACVR1	YER160C-A	0.632564	0.857752
ACVR1	YER162C	0.0112706	-0.808762
ACVR1	YER163C	0.700187	-0.479434
ACVR1	YER165C-A	0.49309	-0.061529
ACVR1	YER166W	0.319804	-0.113374
ACVR1	YER167W	0.849523	-0.226208
ACVR1	YER168C	0.439554	-0.213021
ACVR1	YER169W	0.0788944	-0.92963
ACVR1	YER171W	1.5807	0.499929
ACVR1	YER172C	1.56662	0.162507
ACVR1	YER172C-A	0.646652	-0.545655
ACVR1	YER173W	5.00697	0.714698
ACVR1	YER174C	0.772038	-0.309348
ACVR1	YER175C	1.30457	0.417018
ACVR1	YER176W	0.464913	-0.554543
ACVR1	YER177W	0.590299	-0.283935
ACVR1	YER178W	0.712867	-0.352456
ACVR1	YER180C	0.352207	-0.216293
ACVR1	YER181C	0.325439	-0.509067
ACVR1	YER182W	0.798805	0.0655031
ACVR1	YER183C	0.894606	1.00966
ACVR1	YER184C	1.43278	0.689359
ACVR1	YER185W	0.981953	-0.601865
ACVR1	YER186C	0.893197	0.455272
ACVR1	YER187W	0.918556	0.122425
ACVR1	YHL002W	4.9154	0.592396
ACVR1	YHL003C	11.9229	2.22249
ACVR1	YHL005C	0.245136	-0.680605
ACVR1	YHL006C	0.767811	-0.226986
ACVR1	YHL007C	0.428284	0.646393
ACVR1	YHL008C	1.11438	-0.202106
ACVR1	YHL009C	0.297263	-0.331911
ACVR1	YHL010C	1.76808	0.0886444
ACVR1	YHL012W	0.569166	-0.265032
ACVR1	YHL013C	0.777673	0.464166
ACVR1	YHL014C	2.93177	0.453814
ACVR1	YHL016C	0.090165	-0.774515
ACVR1	YHL017W	0.8777	-0.193886
ACVR1	YHL019C	0.487454	-0.2673
ACVR1	YHL020C	0.139474	-0.202332
ACVR1	YHL021C	0.194418	-0.549687
ACVR1	YHL022C	0.826982	0.0892795
ACVR1	YHL023C	1.49477	0.379837
ACVR1	YHL024W	1.26654	-0.128358
ACVR1	YHL026C	1.11579	1.02742
ACVR1	YHL027W	1.43137	0.544987
ACVR1	YHL028W	0.462095	-0.60359
ACVR1	YHL029C	6.49329	1.85205
ACVR1	YHL030W	1.27217	0.319177
ACVR1	YHL032C	0.736817	-0.0992628
ACVR1	YHL033C	0.0126794	0.707107
ACVR1	YHL034C	1.62156	1.60625
ACVR1	YHL035C	0.208507	-0.589565
ACVR1	YHL036W	0.56494	-0.221635
ACVR1	YHL037C	0.366295	-0.52498
ACVR1	YHL038C	0.573393	-0.10536
ACVR1	YHL039W	1.89769	0.414311
ACVR1	YHL040C	0.670602	-0.290639
ACVR1	YHL041W	0.822755	-0.458354
ACVR1	YHL042W	0.891788	-0.890304
ACVR1	YHL043W	0.777673	-0.690845
ACVR1	YHL044W	0.364886	-0.360707
ACVR1	YHL045W	1.26231	-0.0675707
ACVR1	YHL046C	0.28881	-0.338631
ACVR1	YHL047C	1.25245	-0.168747
ACVR1	YHR001W-A	1.18482	0.396098
ACVR1	YHR003C	3.23608	0.096378
ACVR1	YHR004C	0.38461	1.0371
ACVR1	YHR006W	3.35301	0.289499
ACVR1	YHR009C	1.73145	-0.111388
ACVR1	YHR013C	0.0352207	-0.315017
ACVR1	YHR014W	0.00422648	-1.07964
ACVR1	YHR015W	1.42714	-0.217037
ACVR1	YHR016C	2.30625	0.0907662
ACVR1	YHR017W	0.880517	0.390578
ACVR1	YHR018C	1.83852	0.421362
ACVR1	YHR022C	0.672011	-0.780413
ACVR1	YHR028C	1.05099	-0.514459
ACVR1	YHR030C	0.0338119	-0.339941
ACVR1	YHR031C	0.225412	-0.158569
ACVR1	YHR032W	0.484637	-0.432548
ACVR1	YHR033W	2.56829	0.553419
ACVR1	YHR035W	1.79344	-0.265147
ACVR1	YHR037W	1.06648	0.0718917
ACVR1	YHR043C	1.07071	0.121832
ACVR1	YHR044C	0.641017	-0.359652
ACVR1	YHR045W	1.82866	-0.0265912
ACVR1	YHR046C	0.00140883	-0.78313
ACVR1	YHR047C	1.05521	0.232408
ACVR1	YHR048W	0.00140883	-0.857768
ACVR1	YHR049C-A	1.19328	0.357414
ACVR1	YHR049W	1.12143	0.171886
ACVR1	YHR050W	0.00563531	-0.864382
ACVR1	YHR051W	0.405742	0.34094
ACVR1	YHR057C	0.966456	0.208864
ACVR1	YHR061C	0.690326	-0.218691
ACVR1	YHR066W	0.0704414	-0.66619
ACVR1	YHR073W	0.986179	-0.237118
ACVR1	YHR075C	0.438145	-0.467603
ACVR1	YHR076W	0.781899	0.188434
ACVR1	YHR077C	1.0538	1.3254
ACVR1	YHR078W	1.34966	0.568057
ACVR1	YHR079C	0.548034	-0.525489
ACVR1	YHR080C	0.777673	-0.338732
ACVR1	YHR082C	0.876291	-0.178803
ACVR1	YHR086W	1.65115	-0.0210192
ACVR1	YHR087W	0.749496	-0.129071
ACVR1	YHR091C	0.100027	-0.0402503
ACVR1	YHR092C	1.09325	0.609768
ACVR1	YHR093W	1.07634	-0.133941
ACVR1	YHR094C	0.788944	-0.458591
ACVR1	YHR095W	1.24963	0.186498
ACVR1	YHR096C	0.246545	-0.72895
ACVR1	YHR097C	1.16651	0.569305
ACVR1	YHR103W	0.176103	-0.503273
ACVR1	YHR104W	0.85375	0.679809
ACVR1	YHR105W	0.643834	-0.342275
ACVR1	YHR106W	0.731182	-0.332645
ACVR1	YHR108W	0.594525	1.39245
ACVR1	YHR109W	0.584664	-0.475909
ACVR1	YHR110W	1.54548	1.33984
ACVR1	YHR112C	0.278948	-0.704157
ACVR1	YHR113W	0.521266	-0.662691
ACVR1	YHR114W	1.60747	0.0276044
ACVR1	YHR115C	0.969273	1.30153
ACVR1	YHR116W	0.483228	0.0865211
ACVR1	YHR117W	0.397289	-0.547901
ACVR1	YHR121W	1.62579	0.0603898
ACVR1	YHR123W	0.553669	-0.45098
ACVR1	YHR124W	0.246545	-1.02699
ACVR1	YHR125W	0.691734	-0.0562486
ACVR1	YHR126C	1.12565	-0.164822
ACVR1	YHR127W	2.57111	-0.322418
ACVR1	YHR129C	0.253589	-0.216537
ACVR1	YHR130C	0.977726	-0.0597415
ACVR1	YHR131C	1.40037	-0.392436
ACVR1	YHR132C	1.21159	-0.0526933
ACVR1	YHR133C	0.74527	0.715553
ACVR1	YHR135C	0.676237	0.335808
ACVR1	YHR136C	1.01576	0.429966
ACVR1	YHR137W	1.00168	0.251366
ACVR1	YHR138C	1.08057	-0.695516
ACVR1	YHR139C	0.801623	-0.0310638
ACVR1	YHR139C-A	1.07071	-0.103701
ACVR1	YHR140W	0.948141	-0.208894
ACVR1	YHR142W	0.214142	-0.371124
ACVR1	YHR143W	0.874882	0.347124
ACVR1	YHR146W	1.42292	0.27812
ACVR1	YHR150W	0.505769	-0.226521
ACVR1	YHR151C	0.633972	0.256191
ACVR1	YHR152W	0.736817	-0.439477
ACVR1	YHR153C	0.711458	0.0128583
ACVR1	YHR155W	2.58379	0.464395
ACVR1	YHR156C	0.591708	-0.174702
ACVR1	YHR157W	0.693143	0.387076
ACVR1	YHR158C	0.811485	-0.353168
ACVR1	YHR159W	0.48041	-0.0912433
ACVR1	YHR160C	0.645243	-0.298283
ACVR1	YHR161C	0.917147	-0.149626
ACVR1	YHR162W	0.994632	-0.00462643
ACVR1	YHR163W	0.487454	-0.0331916
ACVR1	YHR167W	0.395881	-0.160783
ACVR1	YHR171W	1.40883	0.395085
ACVR1	YHR176W	0.26486	-0.0305181
ACVR1	YHR177W	1.213	0.104197
ACVR1	YHR178W	0.00281766	-0.436657
ACVR1	YHR179W	0.824164	0.486645
ACVR1	YHR180W	1.74836	-0.524091
ACVR1	YHR181W	1.35529	-0.0569619
ACVR1	YHR182W	0.994632	0.0572278
ACVR1	YHR184W	0.994632	-0.269759
ACVR1	YHR185C	2.00335	0.739731
ACVR1	YHR189W	0.652287	-0.333702
ACVR1	YHR193C	0.238092	-0.124031
ACVR1	YHR195W	0.69737	0.558955
ACVR1	YHR198C	0.972091	-0.188325
ACVR1	YHR199C	0.604387	-0.270925
ACVR1	YHR200W	0.0295854	-0.551377
ACVR1	YHR202W	0.570575	-0.445578
ACVR1	YHR203C	0.0436737	-0.495714
ACVR1	YHR204W	0.153562	-0.478496
ACVR1	YHR206W	0.842479	-0.0579548
ACVR1	YHR207C	0.298671	-0.345857
ACVR1	YHR209W	1.12284	0.00163377
ACVR1	YHR210C	0.242318	-0.756114
ACVR1	YIL001W	0.776264	-0.252412
ACVR1	YIL002C	0.996041	0.396108
ACVR1	YIL005W	0.394472	-0.0995755
ACVR1	YIL006W	2.41896	0.220524
ACVR1	YIL007C	2.28371	0.258528
ACVR1	YIL009W	3.18959	-0.248876
ACVR1	YIL010W	4.92526	0.281026
ACVR1	YIL011W	1.71595	1.11062
ACVR1	YIL012W	0.43251	-0.369616
ACVR1	YIL013C	0.446598	-0.96788
ACVR1	YIL014W	0.477593	-0.753212
ACVR1	YIL015W	0.648061	-0.287135
ACVR1	YIL016W	0.676237	0.298287
ACVR1	YIL020C	0.333892	-0.239901
ACVR1	YIL023C	0.752314	0.206384
ACVR1	YIL024C	0.401516	-0.172624
ACVR1	YIL027C	0.0352207	-0.546848
ACVR1	YIL028W	0.54099	-0.310729
ACVR1	YIL029C	0.560713	-0.229115
ACVR1	YIL032C	0.191601	-0.748692
ACVR1	YIL034C	0.00845297	-0.707107
ACVR1	YIL035C	0.00140883	-1.05524
ACVR1	YIL036W	0.680464	0.0119758
ACVR1	YIL037C	0.00140883	-0.381143
ACVR1	YIL038C	22.2186	1.7271
ACVR1	YIL041W	0.650878	0.276022
ACVR1	YIL042C	0.690326	-0.263989
ACVR1	YIL043C	0.170468	-0.152822
ACVR1	YIL044C	0.0831208	-0.520869
ACVR1	YIL045W	1.84697	2.2337
ACVR1	YIL050W	1.95545	0.172411
ACVR1	YIL052C	1.31444	0.556808
ACVR1	YIL053W	0.407151	-0.00854402
ACVR1	YIL054W	0.641017	-0.578554
ACVR1	YIL055C	4.69421	2.27135
ACVR1	YIL056W	5.73534	0.699184
ACVR1	YIL057C	0.419831	0.0485635
ACVR1	YIL059C	1.51308	-0.914095
ACVR1	YIL060W	0.16765	-0.455896
ACVR1	YIL064W	0.386019	-0.741001
ACVR1	YIL065C	1.23695	0.351998
ACVR1	YIL066C	5.1704	0.952066
ACVR1	YIL067C	0.835435	0.461146
ACVR1	YIL069C	0.263451	-0.3973
ACVR1	YIL070C	2.46545	0.0690633
ACVR1	YIL071C	2.18227	-0.476998
ACVR1	YIL072W	1.51026	2.47457
ACVR1	YIL073C	0.67342	-0.680103
ACVR1	YIL074C	3.31356	-0.429888
ACVR1	YIL076W	0.38461	-0.401415
ACVR1	YIL077C	1.42432	0.863368
ACVR1	YIL079C	0.0859385	-1.00928
ACVR1	YIL084C	0.822755	-0.138208
ACVR1	YIL085C	1.81598	-0.331497
ACVR1	YIL086C	2.22454	1.48287
ACVR1	YIL087C	2.45418	0.165156
ACVR1	YIL088C	2.0583	-0.144627
ACVR1	YIL089W	6.45807	0.939572
ACVR1	YIL090W	1.10029	0.448415
ACVR1	YIL092W	3.78693	0.51667
ACVR1	YIL093C	0.0648061	-0.4649
ACVR1	YIL094C	0.549443	0.0665886
ACVR1	YIL095W	1.21441	0.417057
ACVR1	YIL096C	0.911512	-0.044049
ACVR1	YIL098C	2.5528	0.852855
ACVR1	YIL099W	0.921373	-0.815924
ACVR1	YIL100W	0.00140883	-1.09176
ACVR1	YIL101C	0.62552	-0.273603
ACVR1	YIL102C	0.967865	0.370994
ACVR1	YIL105C	1.46095	0.689152
ACVR1	YIL107C	0.683281	-0.0350063
ACVR1	YIL108W	2.54153	0.289385
ACVR1	YIL110W	0.211324	0.123992
ACVR1	YIL111W	1.35107	0.497371
ACVR1	YIL112W	0.624111	0.445055
ACVR1	YIL113W	0.178921	-0.824352
ACVR1	YIL114C	2.70636	0.650037
ACVR1	YIL117C	0.970682	-0.487448
ACVR1	YIL119C	1.07353	0.573027
ACVR1	YIL120W	5.87763	0.228939
ACVR1	YIL121W	0.166242	-0.809177
ACVR1	YIL123W	0.476184	-0.134493
ACVR1	YIL124W	2.0752	0.557093
ACVR1	YIL125W	0.338119	-0.342269
ACVR1	YIL130W	1.82021	-0.113837
ACVR1	YIL131C	1.0214	-0.236055
ACVR1	YIL132C	1.35952	-0.398789
ACVR1	YIL133C	0.0422648	-0.759494
ACVR1	YIL134W	0.0380383	-0.637858
ACVR1	YIL135C	2.57534	0.519527
ACVR1	YIL136W	0.356433	-0.248824
ACVR1	YIL137C	2.92895	1.00956
ACVR1	YIL138C	1.65537	0.850217
ACVR1	YIL139C	0.00140883	-0.762669
ACVR1	YIL140W	1.73004	-0.0925205
ACVR1	YIL141W	1.44123	-0.425527
ACVR1	YIL145C	0.870656	-0.908271
ACVR1	YIL146C	2.25694	-0.2095
ACVR1	YIL148W	0.0986179	-0.341453
ACVR1	YIL152W	1.48772	-0.475062
ACVR1	YIL154C	0.193009	-0.144855
ACVR1	YIL155C	1.42855	-0.068798
ACVR1	YIL156W	1.92164	-0.0899366
ACVR1	YIL157C	1.25949	-0.0767008
ACVR1	YIL158W	0.487454	-0.383945
ACVR1	YIL159W	1.68918	0.353195
ACVR1	YIL160C	1.91601	0.807184
ACVR1	YIL161W	1.40319	0.0774017
ACVR1	YIL162W	2.19354	-0.0738979
ACVR1	YIL163C	2.53871	0.509135
ACVR1	YIL164C	1.32289	-0.144598
ACVR1	YIL165C	1.89346	-0.0488914
ACVR1	YIL166C	0.848114	-0.141063
ACVR1	YIL167W	2.31048	0.701662
ACVR1	YIL168W	2.98953	-0.0845356
ACVR1	YIL170W	3.46149	0.169345
ACVR1	YIL173W	2.84301	-0.137854
ACVR1	YIR001C	4.45894	1.14216
ACVR1	YIR002C	0.710049	-0.681831
ACVR1	YIR003W	1.02422	-0.860532
ACVR1	YIR004W	0.591708	0.260767
ACVR1	YIR007W	3.15014	-0.119362
ACVR1	YIR013C	4.16027	0.608932
ACVR1	YIR014W	4.67449	0.615767
ACVR1	YIR016W	3.7024	-0.346736
ACVR1	YJL003W	0.15638	-0.3997
ACVR1	YJL004C	0.805849	0.0475696
ACVR1	YJL005W	0.311351	-0.113435
ACVR1	YJL007C	1.6286	-0.482489
ACVR1	YJL012C	0.704414	0.0189335
ACVR1	YJL013C	1.04394	-0.277928
ACVR1	YJL016W	3.63055	0.574735
ACVR1	YJL017W	1.3398	0.0319518
ACVR1	YJL020C	1.95123	1.15109
ACVR1	YJL021C	1.03126	-0.0105112
ACVR1	YJL022W	0.85375	0.880292
ACVR1	YJL023C	0.184556	-0.87329
ACVR1	YJL024C	0.36066	-0.391176
ACVR1	YJL027C	2.61478	0.514036
ACVR1	YJL030W	1.74272	0.0983081
ACVR1	YJL036W	0.934053	-0.913337
ACVR1	YJL037W	3.96444	-0.239009
ACVR1	YJL038C	2.15973	-0.240121
ACVR1	YJL042W	2.83315	-0.149648
ACVR1	YJL043W	2.71904	0.00526277
ACVR1	YJL044C	1.49195	-0.433189
ACVR1	YJL045W	2.21609	-0.313022
ACVR1	YJL046W	0.109889	-0.284982
ACVR1	YJL047C	0.104253	-0.457712
ACVR1	YJL048C	3.15014	0.0520937
ACVR1	YJL049W	3.07547	-0.260479
ACVR1	YJL051W	5.03515	0.266093
ACVR1	YJL052W	0.26486	-0.596023
ACVR1	YJL053W	1.3412	0.371769
ACVR1	YJL055W	2.50771	0.763634
ACVR1	YJL056C	0.0267677	-0.810858
ACVR1	YJL057C	1.69623	0.0243036
ACVR1	YJL058C	2.65987	-0.635789
ACVR1	YJL060W	3.21917	0.0199518
ACVR1	YJL062W	0.00422648	-1.27133
ACVR1	YJL064W	6.21434	1.56242
ACVR1	YJL065C	1.45391	0.101085
ACVR1	YJL066C	1.82584	0.206634
ACVR1	YJL067W	1.38347	-0.491178
ACVR1	YJL068C	3.25017	0.239595
ACVR1	YJL070C	2.59224	-0.109633
ACVR1	YJL071W	1.40601	-0.430619
ACVR1	YJL073W	2.46545	0.281564
ACVR1	YJL077C	3.00362	-0.4681
ACVR1	YJL078C	2.06675	0.163727
ACVR1	YJL079C	2.20622	-0.0311449
ACVR1	YJL080C	0.0464913	-0.756911
ACVR1	YJL082W	0.724137	-1.03186
ACVR1	YJL083W	3.23608	-0.171467
ACVR1	YJL084C	1.63706	-0.88061
ACVR1	YJL089W	1.9949	0.0167899
ACVR1	YJL092W	0.0690326	-0.748538
ACVR1	YJL093C	0.969273	-1.2157
ACVR1	YJL094C	1.9625	-0.270462
ACVR1	YJL095W	0.776264	0.0808375
ACVR1	YJL096W	0.0464913	-0.441569
ACVR1	YJL098W	2.52603	-0.34189
ACVR1	YJL099W	1.38347	-0.00645337
ACVR1	YJL100W	3.51643	0.0788572
ACVR1	YJL101C	1.67087	0.881996
ACVR1	YJL103C	1.94982	0.85185
ACVR1	YJL105W	1.05521	0.694496
ACVR1	YJL106W	2.83456	-0.381739
ACVR1	YJL107C	7.79786	1.11282
ACVR1	YJL108C	1.75963	0.16654
ACVR1	YJL110C	2.3133	0.308519
ACVR1	YJL112W	1.73004	-0.298129
ACVR1	YJL116C	3.0797	-0.00300474
ACVR1	YJL117W	0.0690326	-0.590183
ACVR1	YJL118W	3.44036	0.186437
ACVR1	YJL119C	6.06782	1.67272
ACVR1	YJL120W	0.562122	0.0803979
ACVR1	YJL121C	0.440963	1.27219
ACVR1	YJL122W	2.87683	0.260045
ACVR1	YJL123C	1.49899	-0.13118
ACVR1	YJL124C	1.0214	0.349587
ACVR1	YJL126W	0.738226	-1.14342
ACVR1	YJL128C	0.245136	-0.170517
ACVR1	YJL130C	0.646652	-0.080737
ACVR1	YJL131C	0.00281766	-0.971366
ACVR1	YJL132W	2.29075	-0.00221059
ACVR1	YJL133W	0.910103	-0.119372
ACVR1	YJL134W	6.52428	1.22994
ACVR1	YJL135W	4.75902	1.32939
ACVR1	YJL141C	0.27613	-0.4675
ACVR1	YJL142C	1.88501	0.253107
ACVR1	YJL144W	1.19328	0.610376
ACVR1	YJL145W	0.993224	0.223483
ACVR1	YJL146W	0.357842	-0.476792
ACVR1	YJL147C	0.94955	-0.0538944
ACVR1	YJL148W	0.883335	0.544901
ACVR1	YJL150W	1.73568	0.486348
ACVR1	YJL152W	1.42151	0.421375
ACVR1	YJL153C	1.09889	0.941742
ACVR1	YJL154C	0.839661	0.492719
ACVR1	YJL155C	0.417013	-0.0985459
ACVR1	YJL157C	1.12424	-0.0324163
ACVR1	YJL158C	0.814302	-0.176051
ACVR1	YJL159W	0.650878	0.60721
ACVR1	YJL162C	0.171877	-0.0527171
ACVR1	YJL164C	0.221186	-0.712648
ACVR1	YJL166W	0.173286	-0.657047
ACVR1	YJL168C	0.260633	0.049158
ACVR1	YJL169W	0.653696	-0.01611
ACVR1	YJL170C	1.62297	0.835589
ACVR1	YJL171C	1.92869	0.24539
ACVR1	YJL177W	0.131021	-0.433633
ACVR1	YJL178C	1.16792	1.40587
ACVR1	YJL179W	0.0577619	-1.00451
ACVR1	YJL181W	0.99745	-0.412307
ACVR1	YJL182C	0.397289	-0.615466
ACVR1	YJL185C	0.787535	0.750436
ACVR1	YJL186W	0.90165	-0.344637
ACVR1	YJL187C	0.598752	-0.684748
ACVR1	YJL190C	0.373339	-0.551991
ACVR1	YJL192C	0.112706	-0.439598
ACVR1	YJL193W	0.838252	0.21318
ACVR1	YJL197W	0.904467	0.03536
ACVR1	YJL198W	0.691734	0.0791052
ACVR1	YJL199C	0.687508	0.236013
ACVR1	YJL204C	0.246545	-0.0834987
ACVR1	YJL206C-A	0.524084	-0.170949
ACVR1	YJL207C	0.969273	-0.204231
ACVR1	YJL208C	0.30008	-0.0654808
ACVR1	YJL209W	0.219777	-0.519345
ACVR1	YJL210W	1.93009	0.523716
ACVR1	YJL211C	1.52576	-0.2453
ACVR1	YJL212C	3.68408	1.91971
ACVR1	YJL213W	1.73145	0.226667
ACVR1	YJL214W	1.36938	-0.328777
ACVR1	YJL215C	1.36797	-0.508679
ACVR1	YJL216C	1.22991	-0.305856
ACVR1	YJL217W	1.43419	0.597591
ACVR1	YJL218W	1.44405	0.193534
ACVR1	YJR001W	0.735408	-0.838991
ACVR1	YJR003C	1.52153	0.1035
ACVR1	YJR004C	3.15437	0.44474
ACVR1	YJR005W	0.959412	-0.212416
ACVR1	YJR008W	1.14819	0.209241
ACVR1	YJR009C	0.804441	-0.988954
ACVR1	YJR010W	1.21441	-0.00456201
ACVR1	YJR011C	0.979135	0.499713
ACVR1	YJR014W	0.811485	-0.402332
ACVR1	YJR015W	1.41869	-0.154813
ACVR1	YJR019C	1.98504	-0.0066893
ACVR1	YJR020W	2.20763	0.322226
ACVR1	YJR021C	0.898832	0.106579
ACVR1	YJR024C	0.648061	-0.372585
ACVR1	YJR025C	1.37502	-0.245968
ACVR1	YJR026W	0.209915	-1.06891
ACVR1	YJR030C	0.111297	-0.835864
ACVR1	YJR031C	2.22313	0.482437
ACVR1	YJR033C	0.205689	-0.52615
ACVR1	YJR034W	0.0690326	-0.884904
ACVR1	YJR035W	1.91601	0.020802
ACVR1	YJR036C	1.12424	-0.420288
ACVR1	YJR037W	3.31215	0.224879
ACVR1	YJR038C	1.40037	-0.338205
ACVR1	YJR039W	1.01295	0.046856
ACVR1	YJR040W	0.905876	-0.108233
ACVR1	YJR043C	0.181739	0.14211
ACVR1	YJR044C	0.0126794	-0.747379
ACVR1	YJR048W	1.48209	0.186708
ACVR1	YJR049C	0.819938	0.0594528
ACVR1	YJR050W	0.185965	-0.665315
ACVR1	YJR051W	1.34966	-1.23669
ACVR1	YJR052W	0.669193	-0.641787
ACVR1	YJR053W	1.17496	-0.0706584
ACVR1	YJR054W	1.08339	0.0687173
ACVR1	YJR056C	1.30317	0.0135311
ACVR1	YJR058C	1.52858	-0.282876
ACVR1	YJR059W	0.819938	1.09333
ACVR1	YJR060W	0.331075	0.224953
ACVR1	YJR061W	1.81598	-0.226599
ACVR1	YJR062C	1.723	-0.296372
ACVR1	YJR066W	1.06226	-0.0622088
ACVR1	YJR069C	0.602978	-0.418245
ACVR1	YJR070C	0.366295	-0.142139
ACVR1	YJR073C	0.950959	1.38902
ACVR1	YJR075W	0.604387	-0.230698
ACVR1	YJR077C	0.381792	-0.281941
ACVR1	YJR078W	2.70495	-0.350533
ACVR1	YJR079W	0.00281766	-0.97121
ACVR1	YJR080C	0.903059	-0.24697
ACVR1	YJR082C	1.63142	-0.689199
ACVR1	YJR083C	1.51308	0.520113
ACVR1	YJR084W	1.07071	-0.274582
ACVR1	YJR087W	2.63592	-0.4493
ACVR1	YJR088C	0.00563531	-0.744147
ACVR1	YJR091C	2.30343	-0.181437
ACVR1	YJR092W	4.39132	1.04946
ACVR1	YJR094C	4.88722	0.751997
ACVR1	YJR094W-A	0.424057	-0.588582
ACVR1	YJR095W	1.86529	0.0570397
ACVR1	YJR096W	2.87542	-0.43749
ACVR1	YJR097W	2.15832	0.223609
ACVR1	YJR098C	2.99658	-0.385387
ACVR1	YJR099W	2.69931	0.288335
ACVR1	YJR100C	1.6117	-0.622235
ACVR1	YJR102C	1.15947	0.98058
ACVR1	YJR103W	1.00309	0.239339
ACVR1	YJR106W	1.52717	-0.21234
ACVR1	YJR107W	2.88669	-0.56472
ACVR1	YJR108W	1.08057	0.0131657
ACVR1	YJR109C	4.45612	0.367904
ACVR1	YJR110W	1.82584	0.730047
ACVR1	YJR111C	0.448007	0.138765
ACVR1	YJR113C	0.166242	-0.458306
ACVR1	YJR115W	2.70918	-0.0631088
ACVR1	YJR116W	4.37723	0.716346
ACVR1	YJR117W	5.03092	0.205877
ACVR1	YJR118C	0.0605796	-0.420079
ACVR1	YJR119C	1.76385	-0.459175
ACVR1	YJR120W	0.245136	-0.728136
ACVR1	YJR121W	0.0394472	-0.0871681
ACVR1	YJR124C	1.26372	-0.365563
ACVR1	YJR126C	0.743861	-0.446243
ACVR1	YJR127C	2.30343	0.173042
ACVR1	YJR128W	1.12706	-0.591096
ACVR1	YJR129C	0.917147	-0.313888
ACVR1	YJR130C	1.28203	-0.140717
ACVR1	YJR131W	4.49557	0.920056
ACVR1	YJR133W	2.97122	-0.39425
ACVR1	YJR134C	1.54548	0.067997
ACVR1	YJR135C	0.38461	-0.28611
ACVR1	YJR137C	2.66691	-0.00571082
ACVR1	YJR140C	0.742452	0.538098
ACVR1	YJR142W	1.67932	0.556181
ACVR1	YJR144W	0.388836	-0.432685
ACVR1	YJR146W	3.60942	-0.672318
ACVR1	YJR147W	0.831208	-0.168016
ACVR1	YJR148W	2.47531	0.0147947
ACVR1	YJR149W	1.15101	0.135361
ACVR1	YJR150C	2.99376	0.0891377
ACVR1	YJR152W	1.68073	-0.532637
ACVR1	YJR153W	2.83456	-0.292612
ACVR1	YJR154W	1.22004	0.0656443
ACVR1	YLL001W	0.197236	-0.22278
ACVR1	YLL005C	1.75117	0.285353
ACVR1	YLL007C	13.1697	1.59635
ACVR1	YLL009C	0.462095	-0.326046
ACVR1	YLL010C	1.47645	-0.0380914
ACVR1	YLL012W	1.6751	0.062607
ACVR1	YLL013C	1.12565	0.328709
ACVR1	YLL014W	0.752314	0.151835
ACVR1	YLL015W	0.505769	-0.439979
ACVR1	YLL016W	0.972091	-0.152632
ACVR1	YLL017W	0.629746	-0.405524
ACVR1	YLL019C	0.869247	0.182086
ACVR1	YLL020C	0.498725	-0.402012
ACVR1	YLL021W	0.290219	-0.27009
ACVR1	YLL024C	0.557896	-0.998799
ACVR1	YLL026W	0.84107	-0.63256
ACVR1	YLL028W	1.45814	-0.173981
ACVR1	YLL030C	5.1549	1.70278
ACVR1	YLL032C	1.59057	-0.00338917
ACVR1	YLL033W	0.0366295	-0.572581
ACVR1	YLL038C	0.549443	0.593592
ACVR1	YLL039C	0.664967	-0.0153691
ACVR1	YLL041C	0.338119	-0.104988
ACVR1	YLL042C	1.63706	-0.599793
ACVR1	YLL043W	0.266268	-0.42294
ACVR1	YLL044W	0.149336	-0.214192
ACVR1	YLL045C	0.0887561	-0.221998
ACVR1	YLL046C	3.42627	-0.153544
ACVR1	YLL047W	2.48799	-0.48554
ACVR1	YLL048C	1.82302	0.14215
ACVR1	YLL049W	0.355025	-0.150359
ACVR1	YLL051C	2.67677	0.723846
ACVR1	YLL052C	1.68355	-0.293903
ACVR1	YLL053C	2.51898	-0.118912
ACVR1	YLL054C	2.29921	-0.120394
ACVR1	YLL055W	0.760767	-0.829726
ACVR1	YLL056C	1.5159	-0.411879
ACVR1	YLL057C	2.4584	0.872543
ACVR1	YLL058W	3.69536	0.0280508
ACVR1	YLL059C	1.49758	0.246572
ACVR1	YLL060C	2.90782	-0.769133
ACVR1	YLL061W	2.13015	-0.273309
ACVR1	YLL062C	0.886153	-0.81629
ACVR1	YLL063C	0.979135	-0.0332989
ACVR1	YLR001C	2.9839	0.405611
ACVR1	YLR003C	1.31444	0.274358
ACVR1	YLR004C	1.44687	-0.110032
ACVR1	YLR006C	1.36656	0.848219
ACVR1	YLR011W	2.02871	0.0293386
ACVR1	YLR012C	2.39782	0.674672
ACVR1	YLR013W	2.14283	1.30364
ACVR1	YLR014C	1.64974	1.18331
ACVR1	YLR015W	0.979135	0.115256
ACVR1	YLR016C	1.41165	-0.0140497
ACVR1	YLR017W	1.98363	-0.250459
ACVR1	YLR018C	0.283174	-0.910725
ACVR1	YLR019W	3.64745	-0.453272
ACVR1	YLR020C	1.3722	-0.0181873
ACVR1	YLR021W	0.0112706	-0.501601
ACVR1	YLR023C	0.442372	-0.759221
ACVR1	YLR024C	0.63679	-0.337545
ACVR1	YLR025W	1.41305	0.772845
ACVR1	YLR028C	3.40232	1.06022
ACVR1	YLR030W	1.60888	-0.277907
ACVR1	YLR031W	0.980544	-0.164428
ACVR1	YLR032W	0.174695	-0.546116
ACVR1	YLR034C	1.7554	0.174218
ACVR1	YLR035C	0.993224	0.086845
ACVR1	YLR036C	1.18623	-0.0564047
ACVR1	YLR037C	0.898832	-0.534084
ACVR1	YLR038C	0.835435	-0.172236
ACVR1	YLR039C	0.425466	-0.409115
ACVR1	YLR040C	1.23554	0.116578
ACVR1	YLR041W	1.91319	0.396183
ACVR1	YLR042C	1.62579	-0.20591
ACVR1	YLR043C	0.250771	-1.30444
ACVR1	YLR044C	0.570575	0.0800629
ACVR1	YLR046C	0.0169059	-1.03004
ACVR1	YLR047C	1.44123	-0.47933
ACVR1	YLR049C	0.0605796	-0.958955
ACVR1	YLR050C	2.31611	-0.0422192
ACVR1	YLR053C	0.0859385	-0.754517
ACVR1	YLR054C	0.00422648	-0.991164
ACVR1	YLR055C	0.259224	0.149289
ACVR1	YLR057W	0.109889	-0.894466
ACVR1	YLR058C	0.788944	-0.181248
ACVR1	YLR059C	0.16765	-0.924793
ACVR1	YLR063W	0.209915	-0.856973
ACVR1	YLR064W	0.76922	-0.307598
ACVR1	YLR067C	0.0295854	-0.626845
ACVR1	YLR070C	1.7878	-0.0410223
ACVR1	YLR072W	1.41446	-0.0279866
ACVR1	YLR073C	1.12002	0.00989855
ACVR1	YLR077W	1.70891	-0.288611
ACVR1	YLR079W	0.0507178	-1.08481
ACVR1	YLR080W	0.731182	-0.869119
ACVR1	YLR081W	1.24259	-0.0988223
ACVR1	YLR082C	1.1975	-0.419024
ACVR1	YLR083C	0.666376	-0.185928
ACVR1	YLR084C	0.346572	-0.259034
ACVR1	YLR085C	0.0633972	-0.728357
ACVR1	YLR087C	0.00422648	-0.765734
ACVR1	YLR089C	0.688917	0.0746178
ACVR1	YLR090W	0.0281766	-0.858359
ACVR1	YLR092W	0.0380383	-0.825223
ACVR1	YLR093C	0.00704414	-1.22603
ACVR1	YLR094C	0.040856	-0.500631
ACVR1	YLR095C	0.377566	-1.19834
ACVR1	YLR096W	1.0848	-0.185322
ACVR1	YLR097C	1.8357	0.598108
ACVR1	YLR098C	0.614249	-0.404035
ACVR1	YLR099C	1.1172	0.180506
ACVR1	YLR102C	0.274721	-0.508285
ACVR1	YLR104W	1.90192	0.660341
ACVR1	YLR107W	2.12029	0.729929
ACVR1	YLR108C	0.571984	-0.835383
ACVR1	YLR109W	0.579028	-0.518202
ACVR1	YLR110C	0.834026	-0.142824
ACVR1	YLR111W	0.735408	0.675523
ACVR1	YLR112W	0.74527	-0.672503
ACVR1	YLR113W	0.246545	-0.239976
ACVR1	YLR114C	1.93855	0.523654
ACVR1	YLR118C	1.81598	0.112209
ACVR1	YLR119W	3.33892	1.57051
ACVR1	YLR120C	0.0126794	-1.13004
ACVR1	YLR121C	0.715684	-0.792591
ACVR1	YLR122C	1.65115	-0.351214
ACVR1	YLR123C	2.10761	0.291754
ACVR1	YLR124W	1.1172	-0.158553
ACVR1	YLR125W	0.0915738	-1.2277
ACVR1	YLR126C	0.487454	-0.726985
ACVR1	YLR128W	0.652287	0.185358
ACVR1	YLR130C	0.69737	-0.246449
ACVR1	YLR131C	5.617	1.47524
ACVR1	YLR133W	0.557896	-0.242619
ACVR1	YLR134W	0.409969	-0.158739
ACVR1	YLR135W	0.532537	-0.607954
ACVR1	YLR136C	0.542399	-0.022248
ACVR1	YLR137W	0.780491	-0.784449
ACVR1	YLR138W	0.407151	-0.331646
ACVR1	YLR139C	0.032403	-0.866942
ACVR1	YLR142W	1.33134	0.197749
ACVR1	YLR143W	0.073259	-0.621825
ACVR1	YLR144C	0.608614	-0.0877513
ACVR1	YLR148W	0.00845297	-0.735693
ACVR1	YLR150W	0.705823	0.241219
ACVR1	YLR151C	0.593116	-0.331129
ACVR1	YLR152C	1.01295	-0.0288967
ACVR1	YLR154C	0.538172	0.0192367
ACVR1	YLR164W	0.566349	-0.636868
ACVR1	YLR165C	0.550852	-0.24946
ACVR1	YLR168C	0.274721	-0.407302
ACVR1	YLR169W	0.270495	-0.545667
ACVR1	YLR170C	0.545216	-0.156794
ACVR1	YLR171W	0.967865	0.173982
ACVR1	YLR172C	0.43251	-0.589797
ACVR1	YLR173W	0.26486	-0.774841
ACVR1	YLR174W	0.266268	-0.663529
ACVR1	YLR176C	0.448007	-0.495221
ACVR1	YLR177W	0.770629	0.0345262
ACVR1	YLR178C	0.698779	-0.405048
ACVR1	YLR179C	0.377566	-0.292455
ACVR1	YLR180W	0.857976	-0.134584
ACVR1	YLR181C	0.680464	0.0918582
ACVR1	YLR183C	0.277539	-0.77483
ACVR1	YLR187W	0.135247	-0.808501
ACVR1	YLR188W	1.04676	0.0559425
ACVR1	YLR189C	0.221186	-0.881329
ACVR1	YLR191W	0.33671	-0.505365
ACVR1	YLR192C	2.60351	0.0190616
ACVR1	YLR193C	0.0464913	-0.659962
ACVR1	YLR194C	0.45646	-0.376646
ACVR1	YLR199C	0.446598	-0.0741319
ACVR1	YLR200W	0.0605796	-0.215379
ACVR1	YLR201C	0.531128	0.0426577
ACVR1	YLR202C	0.00140883	-0.820909
ACVR1	YLR203C	0.524084	0.000983937
ACVR1	YLR204W	0.183148	-0.343296
ACVR1	YLR205C	0.535355	0.212452
ACVR1	YLR206W	0.390245	-0.354145
ACVR1	YLR207W	0.993224	-0.136783
ACVR1	YLR209C	1.65819	0.0229317
ACVR1	YLR210W	0.642425	-0.77595
ACVR1	YLR211C	1.48631	0.934733
ACVR1	YLR213C	0.409969	-0.300994
ACVR1	YLR214W	0.267677	-0.477101
ACVR1	YLR217W	0.0958003	-0.420851
ACVR1	YLR218C	0.50436	-0.0897844
ACVR1	YLR219W	0.76922	0.229868
ACVR1	YLR220W	0.810076	-0.072006
ACVR1	YLR221C	0.181739	-0.56857
ACVR1	YLR224W	1.19046	-0.517109
ACVR1	YLR225C	0.850932	-0.380443
ACVR1	YLR227C	0.657923	0.241069
ACVR1	YLR420W	0.590299	-0.122807
ACVR1	YLR451W	0.672011	0.588156
ACVR1	YML001W	1.30739	0.57679
ACVR1	YML002W	0.783308	-0.324526
ACVR1	YML003W	0.835435	-0.257469
ACVR1	YML004C	1.31444	0.708792
ACVR1	YML005W	0.650878	0.378387
ACVR1	YML006C	0.764993	-0.118685
ACVR1	YML007W	1.06789	0.0519102
ACVR1	YML009c	3.23608	0.418882
ACVR1	YML011C	2.74862	-0.0317559
ACVR1	YML012W	1.24118	1.357
ACVR1	YML013W	0.174695	-0.323193
ACVR1	YML014W	0.0281766	-0.491348
ACVR1	YML016C	0.369113	-0.144563
ACVR1	YML017W	2.26962	-0.00834775
ACVR1	YML018C	0.0591708	-0.658264
ACVR1	YML019W	1.44405	0.293099
ACVR1	YML020W	1.21159	0.410833
ACVR1	YML022W	1.38488	0.0334684
ACVR1	YML026C	0.101436	-0.122231
ACVR1	YML027W	0.380383	-0.560278
ACVR1	YML028W	0.605796	0.357701
ACVR1	YML029W	1.17496	-0.208067
ACVR1	YML030W	0.104253	-0.403313
ACVR1	YML031W	3.95035	0.33804
ACVR1	YML032C-A	0.767811	-0.153504
ACVR1	YML033W	0.0648061	-0.919779
ACVR1	YML035C-A	0.424057	-0.343869
ACVR1	YML036W	3.64464	-0.490965
ACVR1	YML037C	1.65396	0.171651
ACVR1	YML038C	1.74554	-0.0587987
ACVR1	YML042W	2.15973	0.532195
ACVR1	YML047C	0.00422648	-1.02901
ACVR1	YML048W	0.998859	0.449387
ACVR1	YML050W	3.19381	0.615715
ACVR1	YML051W	2.34429	0.711413
ACVR1	YML052W	2.14564	0.610491
ACVR1	YML053C	1.85824	1.00022
ACVR1	YML054C	1.2919	1.0043
ACVR1	YML055W	1.00731	0.263632
ACVR1	YML056C	1.43841	0.591072
ACVR1	YML057W	1.12002	-0.0181879
ACVR1	YML058C-A	1.40037	1.49493
ACVR1	YML058W	0.869247	0.00057019
ACVR1	YML059C	1.9315	0.169556
ACVR1	YML060W	0.808667	0.50067
ACVR1	YML062C	0.618475	0.0465179
ACVR1	YML066C	3.22199	0.741005
ACVR1	YML068W	2.23863	0.888846
ACVR1	YML070W	1.1172	-0.219547
ACVR1	YML071C	1.82161	1.41439
ACVR1	YML074C	1.73145	-0.24477
ACVR1	YML076C	0.976318	-0.316123
ACVR1	YML078W	2.5542	0.369478
ACVR1	YML079W	2.99658	0.131033
ACVR1	YML080W	1.31725	1.06248
ACVR1	YML081W	1.94418	0.0289581
ACVR1	YML082W	2.7134	0.520677
ACVR1	YML083C	1.37924	0.0666721
ACVR1	YML084W	2.46122	0.365539
ACVR1	YML087C	2.5218	0.242055
ACVR1	YML088W	2.62605	1.03418
ACVR1	YML089C	2.5373	0.446417
ACVR1	YML090W	0.663558	-0.303137
ACVR1	YML095C	0.991815	-0.671057
ACVR1	YML095C-A	0.0436737	-0.722456
ACVR1	YML096W	2.58943	1.60894
ACVR1	YML097C	0.352207	-0.0340956
ACVR1	YML099C	2.44995	2.24172
ACVR1	YML100W	0.724137	-0.303119
ACVR1	YML100W-A	1.94559	1.20785
ACVR1	YML101C	3.04729	0.333821
ACVR1	YML102C-A	0.00140883	-0.684171
ACVR1	YML102W	0.431101	0.670762
ACVR1	YML103C	0.266268	-0.277267
ACVR1	YML104C	2.41473	0.164845
ACVR1	YML106W	0.804441	-0.429358
ACVR1	YML107C	1.90333	0.111914
ACVR1	YML108W	0.325439	-0.672948
ACVR1	YML109W	2.32738	0.224545
ACVR1	YML110C	0.66074	-0.323077
ACVR1	YML111W	1.79766	-0.18614
ACVR1	YML113W	1.72581	1.05059
ACVR1	YML115C	0.090165	-0.539066
ACVR1	YML116W	2.65141	0.401729
ACVR1	YML117W	0.0803032	-0.430901
ACVR1	YML117W-A	1.40601	0.516212
ACVR1	YML118W	0.00986179	-1.14832
ACVR1	YML119W	1.16087	-0.254138
ACVR1	YML120C	2.12592	0.847342
ACVR1	YML121W	0.157789	-0.268578
ACVR1	YML122C	3.2403	1.83954
ACVR1	YML123C	1.41587	-0.521357
ACVR1	YML124C	0.149336	-0.745182
ACVR1	YML128C	0.687508	-0.0241087
ACVR1	YML129C	0.356433	-0.701965
ACVR1	YML131W	1.2609	-0.26934
ACVR1	YMR002W	1.06366	0.753008
ACVR1	YMR003W	0.798805	0.437117
ACVR1	YMR004W	0.822755	0.0313082
ACVR1	YMR006C	2.19354	0.159158
ACVR1	YMR007W	2.70777	0.496579
ACVR1	YMR008C	1.76526	0.538881
ACVR1	YMR009W	1.86247	0.663277
ACVR1	YMR010W	2.81484	2.02804
ACVR1	YMR011W	0.643834	-0.179094
ACVR1	YMR012W	1.4046	-0.215089
ACVR1	YMR015C	2.70777	1.17523
ACVR1	YMR016C	1.66383	0.862714
ACVR1	YMR017W	1.79344	0.683821
ACVR1	YMR018W	1.34402	0.226044
ACVR1	YMR019W	1.70327	0.196745
ACVR1	YMR020W	1.29753	-0.245905
ACVR1	YMR022W	4.38568	1.40029
ACVR1	YMR023C	0.0690326	-1.31857
ACVR1	YMR025W	0.64947	0.0763657
ACVR1	YMR026C	0.0126794	-0.598078
ACVR1	YMR027W	1.31725	0.094502
ACVR1	YMR029C	0.281766	-0.443683
ACVR1	YMR030W	0.0366295	-0.952317
ACVR1	YMR031C	1.05803	0.289884
ACVR1	YMR031W-A	0.0281766	-0.817943
ACVR1	YMR034C	2.18509	0.398276
ACVR1	YMR035W	0.690326	0.00911528
ACVR1	YMR036C	1.07916	1.12695
ACVR1	YMR039C	1.51308	0.770391
ACVR1	YMR040W	1.52717	-0.0699948
ACVR1	YMR041C	1.61311	0.0974279
ACVR1	YMR042W	0.409969	-0.605668
ACVR1	YMR044W	0.0211324	-0.784963
ACVR1	YMR048W	0.790352	-0.287535
ACVR1	YMR095C	0.58889	-0.775349
ACVR1	YMR096W	1.03126	-0.310466
ACVR1	YMR098C	0.0803032	-0.380269
ACVR1	YMR099C	0.542399	-0.17532
ACVR1	YMR100W	0.666376	-0.299118
ACVR1	YMR101C	0.607205	-0.485995
ACVR1	YMR102C	1.75822	0.161025
ACVR1	YMR103C	0.883335	-0.355593
ACVR1	YMR104C	3.09379	0.404781
ACVR1	YMR105C	0.836844	0.261369
ACVR1	YMR106C	0.922782	-0.395221
ACVR1	YMR107W	1.08761	0.471188
ACVR1	YMR109W	2.5218	0.589681
ACVR1	YMR110C	1.70891	0.264215
ACVR1	YMR111C	1.49336	0.362193
ACVR1	YMR114C	1.52435	-0.0680232
ACVR1	YMR115W	0.846705	1.44838
ACVR1	YMR118C	2.42037	-0.0125862
ACVR1	YMR119W-A	1.00309	-0.668917
ACVR1	YMR120C	0.608614	-0.430852
ACVR1	YMR121C	0.200054	-0.507143
ACVR1	YMR122C	0.683281	0.0324518
ACVR1	YMR123W	0.0943915	-0.0523788
ACVR1	YMR124W	0.75654	-0.230711
ACVR1	YMR126C	0.862203	0.131111
ACVR1	YMR127C	1.22427	0.16728
ACVR1	YMR129W	1.49054	0.00148979
ACVR1	YMR130W	0.791761	-0.259633
ACVR1	YMR132C	1.06366	0.234836
ACVR1	YMR133W	1.46377	-0.206871
ACVR1	YMR135C	0.253589	-0.519882
ACVR1	YMR139W	0.486046	-0.293008
ACVR1	YMR140W	1.72863	-0.638197
ACVR1	YMR141C	0.325439	-0.995037
ACVR1	YMR143W	0.0309942	-0.602714
ACVR1	YMR144W	1.38488	-0.13005
ACVR1	YMR145C	2.25835	-0.0104036
ACVR1	YMR147W	3.16704	0.573482
ACVR1	YMR148W	2.20059	-0.21914
ACVR1	YMR150C	1.20032	1.1099
ACVR1	YMR151W	0.442372	-0.28652
ACVR1	YMR152W	0.0197236	-1.22226
ACVR1	YMR153C-A	2.14142	-0.267436
ACVR1	YMR153W	1.18764	-1.1109
ACVR1	YMR154C	5.99315	0.670283
ACVR1	YMR155W	2.99939	0.447963
ACVR1	YMR156C	0.31276	-0.408735
ACVR1	YMR157C	1.29753	-0.51294
ACVR1	YMR158W	0.169059	-0.997169
ACVR1	YMR158W-A	1.4046	-0.227996
ACVR1	YMR159C	1.95404	-0.0846289
ACVR1	YMR161W	3.42627	-0.0515166
ACVR1	YMR162C	1.12143	-0.515537
ACVR1	YMR163C	2.7768	0.914635
ACVR1	YMR164C	2.91486	1.85539
ACVR1	YMR166C	0.911512	-0.839062
ACVR1	YMR167W	1.27781	0.221789
ACVR1	YMR169c	0.67342	-0.86293
ACVR1	YMR170C	10.5141	2.45167
ACVR1	YMR171C	1.53844	-0.145069
ACVR1	YMR172C-A	1.46659	0.27528
ACVR1	YMR172W	2.49222	-0.351812
ACVR1	YMR173W-A	0.743861	-0.718374
ACVR1	YMR174c	0.952368	-0.181611
ACVR1	YMR175w	0.0112706	-0.685455
ACVR1	YMR176W	2.82188	0.0526312
ACVR1	YMR177W	2.34852	0.201351
ACVR1	YMR178W	1.48631	-0.0428479
ACVR1	YMR180C	3.94613	1.71279
ACVR1	YMR181C	0.953776	-0.307345
ACVR1	YMR182C	1.60747	-0.310735
ACVR1	YMR183C	1.94418	-0.105651
ACVR1	YMR184W	2.15973	0.737932
ACVR1	YMR186W	0.495907	-0.523993
ACVR1	YMR187C	1.91882	-0.101942
ACVR1	YMR189W	2.12451	0.532383
ACVR1	YMR191W	1.90474	0.772519
ACVR1	YMR192W	2.36542	0.566045
ACVR1	YMR194W	0.0366295	-0.745076
ACVR1	YMR195W	4.11941	2.22316
ACVR1	YMR196W	1.56662	0.153563
ACVR1	YMR199W	0.762176	-0.330709
ACVR1	YMR201C	0.426875	-0.605822
ACVR1	YMR204C	1.60465	0.126823
ACVR1	YMR206W	1.25104	-0.373459
ACVR1	YMR207C	0.16765	-0.731551
ACVR1	YMR209C	1.22145	0.00247692
ACVR1	YMR210W	3.16845	0.228895
ACVR1	YMR214W	0.431101	0.147883
ACVR1	YMR215W	0.903059	-0.034765
ACVR1	YMR216C	1.46095	0.876805
ACVR1	YMR219W	0.0267677	-0.491091
ACVR1	YMR221C	1.08761	-0.425743
ACVR1	YMR222C	1.62579	0.0643315
ACVR1	YMR223W	1.1806	-0.112639
ACVR1	YMR225C	0.862203	-0.726497
ACVR1	YMR226C	0.380383	-0.474687
ACVR1	YMR228W	0.0352207	0.707107
ACVR1	YMR230W	0.0267677	-0.86041
ACVR1	YMR232W	2.64437	0.953394
ACVR1	YMR233W	1.43278	-0.338568
ACVR1	YMR234W	0.974909	-0.383256
ACVR1	YMR237W	0.757949	1.28573
ACVR1	YMR238W	1.74976	0.311541
ACVR1	YMR241W	1.55394	0.389001
ACVR1	YMR242C	0.0887561	-0.400614
ACVR1	YMR244C-A	0.181739	-0.960685
ACVR1	YMR244W	0.500134	-0.35194
ACVR1	YMR245W	0.725546	0.138576
ACVR1	YMR246W	1.40601	0.0100063
ACVR1	YMR247C	1.82302	0.461414
ACVR1	YMR251W	1.83007	0.760365
ACVR1	YMR251W-A	0.615658	-0.43794
ACVR1	YMR252C	1.71877	0.242167
ACVR1	YMR253C	0.959412	-0.572635
ACVR1	YMR254C	1.18623	-0.161219
ACVR1	YMR255W	1.18905	-0.181797
ACVR1	YMR258C	0.672011	-0.326128
ACVR1	YMR259C	1.72722	-0.493806
ACVR1	YMR261C	0.00845297	-0.80194
ACVR1	YMR262W	1.91882	-0.168389
ACVR1	YMR264W	4.03911	2.6063
ACVR1	YMR265C	3.40091	0.336331
ACVR1	YMR271C	1.95968	-0.570079
ACVR1	YMR273C	1.2933	-0.182727
ACVR1	YMR274C	3.44317	0.91075
ACVR1	YMR275C	0.460687	-0.482158
ACVR1	YMR276W	5.07319	2.03239
ACVR1	YMR278W	4.13491	1.68236
ACVR1	YMR279C	1.437	-0.405465
ACVR1	YMR280C	3.67986	1.75714
ACVR1	YMR282C	0.0577619	-0.834248
ACVR1	YMR283C	2.44854	0.641297
ACVR1	YMR284W	1.22004	-0.214928
ACVR1	YMR285C	2.59929	0.32885
ACVR1	YMR289W	1.3891	0.643238
ACVR1	YMR291W	1.53844	0.504912
ACVR1	YMR292W	1.71313	-0.548108
ACVR1	YMR294W	0.256407	-0.262119
ACVR1	YMR294W-A	0.896014	-0.295859
ACVR1	YMR295C	0.0591708	-0.682405
ACVR1	YMR299C	1.05099	0.395963
ACVR1	YMR302C	0.977726	-0.261735
ACVR1	YMR303C	0.25218	-0.87723
ACVR1	YMR304C-A	1.25245	-0.874263
ACVR1	YMR304W	0.00140883	-1.05615
ACVR1	YMR305C	0.712867	-0.271045
ACVR1	YMR306C-A	1.66242	0.197294
ACVR1	YMR306W	2.26258	-0.223288
ACVR1	YMR307W	0.322622	-0.324503
ACVR1	YMR310C	0.0972091	-0.675362
ACVR1	YMR311C	2.53589	0.200895
ACVR1	YMR312W	0.0281766	-0.537372
ACVR1	YMR313C	1.14397	-0.232455
ACVR1	YMR315W	1.91601	-0.223864
ACVR1	YMR316C-A	0.573393	-0.498321
ACVR1	YMR316C-B	1.63988	0.269948
ACVR1	YMR316W	1.55253	-0.0586112
ACVR1	YMR317W	1.76949	-0.606896
ACVR1	YMR318C	2.3781	-0.354297
ACVR1	YMR319C	2.67255	1.21538
ACVR1	YMR320W	2.93177	-0.137755
ACVR1	YNL051W	1.45955	1.02872
ACVR1	YNL052W	2.52603	0.307428
ACVR1	YNL054W	0.85375	0.34463
ACVR1	YNL056W	12.9119	1.43368
ACVR1	YNL057W	1.79344	-0.32502
ACVR1	YNL058C	0.00140883	-1.06263
ACVR1	YNL063W	3.38964	-0.372145
ACVR1	YNL065W	3.33188	0.497327
ACVR1	YNL066W	3.25298	0.0924922
ACVR1	YNL067W	0.245136	-0.349931
ACVR1	YNL068C	1.84697	0.510073
ACVR1	YNL070W	0.635381	0.122897
ACVR1	YNL071W	0.550852	-0.2138
ACVR1	YNL072W	1.11861	-0.801911
ACVR1	YNL074C	3.58828	0.306408
ACVR1	YNL076W	2.03012	-0.0314687
ACVR1	YNL077W	0.414195	-0.229951
ACVR1	YNL078W	1.87233	-0.892967
ACVR1	YNL082W	1.39615	-0.251055
ACVR1	YNL083W	2.01603	0.567903
ACVR1	YNL085W	1.79766	-0.409778
ACVR1	YNL087W	3.25017	-0.0614921
ACVR1	YNL090W	2.3612	1.2714
ACVR1	YNL091W	0.345163	-0.529356
ACVR1	YNL092W	1.85543	-0.751011
ACVR1	YNL093W	1.11016	0.140302
ACVR1	YNL094W	1.43419	-0.424852
ACVR1	YNL095C	2.07239	-0.153467
ACVR1	YNL097C	0.267677	-0.541626
ACVR1	YNL098C	1.4835	1.03873
ACVR1	YNL099C	9.50536	2.20294
ACVR1	YNL100W	1.2919	-0.383764
ACVR1	YNL101W	2.05548	0.119671
ACVR1	YNL104C	1.46941	-0.38147
ACVR1	YNL105W	2.35556	0.346601
ACVR1	YNL106C	1.70468	0.251546
ACVR1	YNL107W	0.129612	-0.514832
ACVR1	YNL108C	1.35247	0.00801791
ACVR1	YNL115C	1.29753	0.381814
ACVR1	YNL116W	1.46095	0.237387
ACVR1	YNL117W	0.154971	1.1675
ACVR1	YNL119W	0.145109	-0.243928
ACVR1	YNL120C	0.0464913	-0.556533
ACVR1	YNL121C	0.169059	-0.296101
ACVR1	YNL122C	1.04676	-0.677513
ACVR1	YNL123W	0.921373	-0.37797
ACVR1	YNL125C	2.53589	0.342682
ACVR1	YNL127W	0.894606	-0.255083
ACVR1	YNL128W	1.21864	-0.398429
ACVR1	YNL129W	2.73594	0.042347
ACVR1	YNL130C	1.33839	-0.323385
ACVR1	YNL134C	2.32175	0.522013
ACVR1	YNL135C	0.201462	-0.21242
ACVR1	YNL136W	0.173286	-0.340012
ACVR1	YNL140C	0.448007	-0.287087
ACVR1	YNL141W	1.85261	-0.216504
ACVR1	YNL142W	0.374748	-0.255825
ACVR1	YNL143C	3.01066	0.304099
ACVR1	YNL144C	0.849523	-1.02761
ACVR1	YNL145W	2.58379	-0.511665
[truncated: 624 more rows]

## Sheet: AGK
Table S2. Barcode counts of yeast deletion strains obtained from high-throughput sequencing.
Query (Kinase)	Subject (yeast gene deletion)	Normalized barcode counts	Z-score
AGK	YAL001C	0.137983	0.062883
AGK	YAL002W	0.00627195	-1.09761
AGK	YAL004W	1.41746	0.785225
AGK	YAL005C	0.827898	-0.902231
AGK	YAL008W	0.0752634	-0.548452
AGK	YAL011W	1.13522	2.47142
AGK	YAL012W	2.80356	-0.215536
AGK	YAL014C	1.51154	0.977012
AGK	YAL017W	0.426493	-0.559288
AGK	YAL018C	0.878073	-0.0345557
AGK	YAL019W	0.263422	-0.623023
AGK	YAL022C	2.09483	1.94453
AGK	YAL027W	0.846713	0.0233805
AGK	YAL028W	0.551932	-0.577474
AGK	YAL029C	0.846713	-0.0363628
AGK	YAL031C	0.395133	-0.523546
AGK	YAL036C	1.57426	0.560693
AGK	YAL037W	0.533116	-0.36889
AGK	YAL039C	0.865529	1.05816
AGK	YAL042W	0.959609	0.276069
AGK	YAL043C-	0.0689915	-0.995593
AGK	YAL045C	0.564476	-0.278762
AGK	YAL046C	0.733818	0.984993
AGK	YAL048C	0.370045	-0.0327162
AGK	YAL049C	0.00627195	-1.11656
AGK	YAL051W	1.21676	0.512169
AGK	YAL053W	2.25163	1.18781
AGK	YAL055W	0.551932	-0.755142
AGK	YAL058W	0.376317	-0.390221
AGK	YAL059W	0.213246	-0.264326
AGK	YAL060W	0.608379	-0.636546
AGK	YAL061W	0.363773	-0.821269
AGK	YAL062W	0.363773	-0.964637
AGK	YAL065C	0.796538	-0.171594
AGK	YAL066W	0.188159	-0.949861
AGK	YAL067C	1.21049	-0.110341
AGK	YAL068C	3.73808	2.44998
AGK	YAR002W	0.131711	0.707107
AGK	YAR014C	0.181887	-0.406245
AGK	YAR020C	1.58053	0.95646
AGK	YAR023C	0.608379	0.131246
AGK	YAR027W	0.206974	-0.888858
AGK	YAR028W	0.00627195	-1.08847
AGK	YAR029W	0.715003	-0.824092
AGK	YAR031W	2.79102	0.659912
AGK	YAR035W	0.501756	-0.498121
AGK	YAR037W	1.42373	0.651228
AGK	YAR040C	0.413949	-0.7734
AGK	YAR042W	0.990968	-0.0434405
AGK	YAR043C	0.495484	0.293054
AGK	YAR044W	0.401405	-0.318247
AGK	YAR047C	1.11014	0.19765
AGK	YBL002W	0.00627195	-1.0901
AGK	YBL003C	0.326141	-0.327212
AGK	YBL005W	0.608379	-0.555478
AGK	YBL008W	0.106623	-0.379876
AGK	YBL009W	0.376317	-0.558352
AGK	YBL010C	0.382589	-0.518985
AGK	YBL011W	2.40843	1.75044
AGK	YBL012C	1.53663	0.910402
AGK	YBL019W	0.696187	-0.0534466
AGK	YBL022C	0.00627195	-0.835403
AGK	YBL036C	0.451581	-0.442152
AGK	YBL037W	0.307326	-0.570113
AGK	YBL038W	0.376317	-0.194591
AGK	YBL044W	1.56799	2.54277
AGK	YBL045C	0.796538	-0.385198
AGK	YBL048W	0.395133	-0.251146
AGK	YBL049W	0.671099	-0.492548
AGK	YBL053W	1.24812	-0.0639618
AGK	YBL054W	0.28851	-0.275092
AGK	YBL055C	1.1854	1.05265
AGK	YBL056W	0.31987	-0.715623
AGK	YBL057C	1.05369	0.422235
AGK	YBL059W	1.29829	-0.216977
AGK	YBL060W	0.307326	-0.736074
AGK	YBL062W	1.04742	0.420796
AGK	YBL063W	2.0133	1.55838
AGK	YBL064C	2.97291	2.51868
AGK	YBL065W	0.0815354	-0.400767
AGK	YBL066C	2.22654	0.882185
AGK	YBL067C	0.125439	-1.22357
AGK	YBL068W	1.10386	-0.318027
AGK	YBL069W	2.00702	0.547443
AGK	YBL070C	3.2865	1.64099
AGK	YBL075C	0.595835	-0.598465
AGK	YBL078C	1.33593	-0.183614
AGK	YBL080C	0.188159	-0.74922
AGK	YBL081W	1.21676	0.696748
AGK	YBL082C	0.508028	-0.217632
AGK	YBL085W	0.376317	-1.06604
AGK	YBL086C	0.00627195	-1.17143
AGK	YBL087C	0.00627195	-0.79012
AGK	YBL088C	2.87883	2.88035
AGK	YBL090W	1.05369	2.63079
AGK	YBL091C	0.702459	-0.424474
AGK	YBL094C	0.639739	-0.105624
AGK	YBL095W	0.796538	-1.0518
AGK	YBL096C	0.31987	-1.24059
AGK	YBL101C	4.93603	-0.570041
AGK	YBL102W	1.34847	-0.409954
AGK	YBL104C	1.07878	0.341936
AGK	YBL106C	0.508028	0.0288367
AGK	YBL107C	3.04817	0.845821
AGK	YBR001C	2.79102	0.383241
AGK	YBR006W	0.357501	-0.369076
AGK	YBR007C	4.79804	2.89549
AGK	YBR008C	1.72479	0.282341
AGK	YBR010W	0.370045	-0.838175
AGK	YBR012C	4.67888	2.41644
AGK	YBR013C	0.28851	-1.30752
AGK	YBR014C	0.639739	-0.520554
AGK	YBR016W	1.67461	-0.178061
AGK	YBR018C	1.98194	-0.0451179
AGK	YBR019C	0.238334	-0.636217
AGK	YBR020W	0.181887	-1.39716
AGK	YBR022W	2.02584	0.265798
AGK	YBR023C	0.244606	-0.641092
AGK	YBR024W	0.953337	-0.214919
AGK	YBR025C	0.909433	1.37382
AGK	YBR027C	0.48294	-0.0212363
AGK	YBR028C	0.401405	-0.744432
AGK	YBR030W	0.884345	0.841668
AGK	YBR031W	0.275966	0.108665
AGK	YBR032W	0.00627195	-1.39115
AGK	YBR033W	1.69343	0.844567
AGK	YBR034C	1.61189	-0.000683276
AGK	YBR037C	0.301054	-0.749238
AGK	YBR040W	1.19794	0.67029
AGK	YBR041W	0.752634	0.874777
AGK	YBR042C	0.137983	-0.840035
AGK	YBR043C	1.34847	-0.288126
AGK	YBR044C	0.169343	0.00790237
AGK	YBR045C	1.98194	0.0931347
AGK	YBR046C	2.24536	-0.140734
AGK	YBR047W	0.112895	-1.31701
AGK	YBR050C	1.79378	-1.29814
AGK	YBR051W	1.30457	-0.694837
AGK	YBR052C	1.86277	0.388106
AGK	YBR053C	2.50878	1.73649
AGK	YBR054W	1.87531	1.00542
AGK	YBR056W	0.150527	-0.681452
AGK	YBR057C	0.74009	-0.392673
AGK	YBR058C	0.639739	-0.985922
AGK	YBR059C	2.90391	0.270188
AGK	YBR062C	0.627195	-0.457584
AGK	YBR063C	0.790266	-0.626568
AGK	YBR064W	3.36804	1.00784
AGK	YBR065C	0.921977	-0.830481
AGK	YBR066C	1.10386	-0.712176
AGK	YBR067C	0.00627195	-1.12729
AGK	YBR068C	2.33317	0.884581
AGK	YBR069C	0.0689915	-1.07103
AGK	YBR071W	1.75615	0.160903
AGK	YBR072W	4.07677	2.63012
AGK	YBR074W	3.5562	1.03154
AGK	YBR075W	0.928249	-0.316973
AGK	YBR076W	0.0250878	-0.0348542
AGK	YBR077C	1.48645	1.76316
AGK	YBR083W	0.896889	-0.260055
AGK	YBR084W	1.42373	-0.119146
AGK	YBR090C-A	0.990968	0.18899
AGK	YBR093C	1.12268	0.12305
AGK	YBR094W	2.08229	2.91585
AGK	YBR098W	0.445309	0.157469
AGK	YBR100W	0.401405	-0.50183
AGK	YBR101C	0.464124	-0.530725
AGK	YBR103W	1.57426	3.06282
AGK	YBR104W	3.44957	2.4094
AGK	YBR105C	1.3422	0.657235
AGK	YBR108W	0.00627195	-0.492463
AGK	YBR113W	0.125439	-0.596475
AGK	YBR114W	0.112895	-0.460714
AGK	YBR116C	1.63071	2.34764
AGK	YBR120C	3.26141	1.9044
AGK	YBR130C	0.188159	-0.980744
AGK	YBR131W	1.13522	2.17388
AGK	YBR138C	0.489212	-0.904322
AGK	YBR139W	2.18264	0.84738
AGK	YBR141C	2.32062	1.06091
AGK	YBR144C	0.539388	-0.25824
AGK	YBR145W	1.27948	0.337395
AGK	YBR147W	1.10386	-0.718454
AGK	YBR150C	1.30457	1.71348
AGK	YBR151W	0.83417	-0.218403
AGK	YBR158W	0.100351	-0.848742
AGK	YBR159W	0.238334	0.221499
AGK	YBR161W	1.49272	1.03894
AGK	YBR162W-A	0.608379	-0.416452
AGK	YBR164C	0.376317	-0.768754
AGK	YBR169C	2.08856	0.536218
AGK	YBR170C	0.48294	-0.394318
AGK	YBR172C	0.00627195	-1.85295
AGK	YBR176W	0.370045	-0.557485
AGK	YBR177C	2.51505	2.65125
AGK	YBR178W	0.620923	-0.117203
AGK	YBR179C	0.294782	1.02079
AGK	YBR180W	0.00627195	-1.1271
AGK	YBR182C	0.683643	0.396892
AGK	YBR183W	0.646011	-0.62307
AGK	YBR184W	1.50527	2.0583
AGK	YBR185C	1.42373	-0.292608
AGK	YBR186W	0.213246	-0.84443
AGK	YBR187W	0.0250878	-0.558783
AGK	YBR188C	0.696187	0.339831
AGK	YBR197C	0.978424	0.376124
AGK	YBR203W	1.50527	0.508139
AGK	YBR204C	0.990968	-0.557597
AGK	YBR205W	0.620923	-1.49221
AGK	YBR206W	1.89413	0.0709835
AGK	YBR207W	2.80983	1.84433
AGK	YBR208C	0.965881	0.0193414
AGK	YBR210W	0.439037	0.149438
AGK	YBR214W	1.78123	2.19095
AGK	YBR215W	0.48294	0.662692
AGK	YBR216C	1.25439	-0.202129
AGK	YBR217W	1.67461	0.491301
AGK	YBR218C	1.21049	-0.359921
AGK	YBR220C	2.05093	0.227466
AGK	YBR221C	0.263422	-0.254047
AGK	YBR222C	1.67461	1.15928
AGK	YBR223C	0.696187	-0.222464
AGK	YBR224W	0.558204	-0.737815
AGK	YBR225W	1.58053	0.996816
AGK	YBR226C	1.04742	-0.761735
AGK	YBR227C	2.22654	0.947798
AGK	YBR228W	1.13522	-0.739348
AGK	YBR229C	3.18615	0.795521
AGK	YBR230C	4.96739	1.70145
AGK	YBR232C	5.57577	3.54723
AGK	YBR233W	0.733818	-0.294745
AGK	YBR235W	0.865529	0.0309672
AGK	YBR238C	1.52408	0.732263
AGK	YBR239C	1.32338	-0.167656
AGK	YBR240C	2.89137	1.22031
AGK	YBR241C	3.713	1.70681
AGK	YBR242W	0.765178	-0.610613
AGK	YBR244W	4.56598	-0.515213
AGK	YBR245C	0.940793	-0.498928
AGK	YBR246W	0.846713	-0.479874
AGK	YBR248C	4.09558	2.55873
AGK	YBR250W	0.370045	-1.4498
AGK	YBR255W	0.827898	-0.29241
AGK	YBR258C	1.46136	0.166556
AGK	YBR259W	0.809082	-1.11028
AGK	YBR261C	1.14777	-0.27177
AGK	YBR262C	0.426493	-1.08026
AGK	YBR263W	2.0572	0.383609
AGK	YBR264C	3.0858	2.19035
AGK	YCL006C	5.55695	1.54376
AGK	YCL009C	0.48294	-0.0961864
AGK	YCL010C	0.426493	-0.0250821
AGK	YCL011C	0.213246	-0.535542
AGK	YCL012W	3.23633	1.58329
AGK	YCL013W	0.890617	-0.0595407
AGK	YCL022C	0.658555	-0.576135
AGK	YCL023C	4.64124	-0.248251
AGK	YCL024W	0.470396	-0.168462
AGK	YCL026C	1.76242	1.44683
AGK	YCL027W	0.520572	-0.31711
AGK	YCL030C	0.0815354	-0.127742
AGK	YCL035C	0.00627195	-1.01527
AGK	YCL036W	0.112895	-0.567453
AGK	YCL037C	0.928249	2.33476
AGK	YCL038C	1.36729	-0.63866
AGK	YCL039W	0.451581	-0.328426
AGK	YCL044C	0.978424	1.73447
AGK	YCL045C	0.915705	0.112361
AGK	YCL048W	0.5143	0.110916
AGK	YCL049C	4.66006	2.77358
AGK	YCL050C	0.00627195	-1.01277
AGK	YCL056C	0.539388	-0.242869
AGK	YCL057W	0.00627195	-1.16984
AGK	YCL062W	1.99448	1.37597
AGK	YCL069W	0.639739	-0.300651
AGK	YCL073C	0.965881	-0.601657
AGK	YCL074W	2.71576	-0.068126
AGK	YCL075W	4.82313	-0.0682276
AGK	YCL076W	2.67185	-0.396249
AGK	YCR001W	0.0125439	-0.58005
AGK	YCR005C	2.23281	1.65842
AGK	YCR006C	0.721274	0.572033
AGK	YCR008W	0.206974	-0.737795
AGK	YCR010C	0.376317	-0.797915
AGK	YCR011C	0.0250878	-1.37017
AGK	YCR015C	0.896889	-0.101261
AGK	YCR018C	1.96312	-0.116565
AGK	YCR019W	1.1854	-0.177434
AGK	YCR020C	0.558204	0.551636
AGK	YCR020C-A	0.633467	1.1931
AGK	YCR021C	2.14501	1.0031
AGK	YCR022C	1.12268	1.00106
AGK	YCR023C	1.17285	0.589698
AGK	YDL009C	0.5143	-0.439259
AGK	YDL010W	0.370045	0.000831902
AGK	YDL011C	0.48294	-0.146789
AGK	YDL012C	0.57702	-0.556548
AGK	YDL019C	0.301054	-0.440062
AGK	YDL022W	0.627195	-0.143979
AGK	YDL023C	0.658555	-0.146134
AGK	YDL026W	0.194431	-1.21825
AGK	YDL034W	1.99448	1.07542
AGK	YDL035C	1.21676	0.553825
AGK	YDL037C	0.796538	0.889009
AGK	YDL038C	1.12895	1.19368
AGK	YDL039C	0.595835	-0.935206
AGK	YDL046W	0.451581	-0.105946
AGK	YDL051W	0.376317	-0.622954
AGK	YDL053C	1.05996	0.524159
AGK	YDL054C	0.169343	-0.147553
AGK	YDL056W	0.00627195	-0.696438
AGK	YDL059C	0.457852	2.70792
AGK	YDL066W	0.22579	0.618483
AGK	YDL067C	0.890617	1.25944
AGK	YDL069C	0.326141	-0.422246
AGK	YDL070W	0.708731	0.61714
AGK	YDL072C	0.28851	-0.610924
AGK	YDL073W	0.25715	0.380253
AGK	YDL078C	2.94782	2.94292
AGK	YDL079C	1.05369	0.0559097
AGK	YDL080C	0.777722	0.170904
AGK	YDL085W	0.232062	-0.577871
AGK	YDL086W	1.21049	0.571927
AGK	YDL089W	0.137983	-0.670485
AGK	YDL093W	2.32689	0.941371
AGK	YDL095W	0.250878	-0.47962
AGK	YDL096C	1.40492	1.38879
AGK	YDL099W	0.00627195	-1.20407
AGK	YDL100C	0.00627195	-0.824691
AGK	YDL104C	1.00978	-0.283552
AGK	YDL109C	0.783994	-1.24259
AGK	YDL112W	4.05168	1.83712
AGK	YDL113C	0.570748	-1.58585
AGK	YDL114W	3.79453	1.66098
AGK	YDL118W	0.395133	-0.644205
AGK	YDL121C	2.11992	0.36
AGK	YDL122W	0.809082	-0.286757
AGK	YDL123W	1.41746	-0.200523
AGK	YDL124W	0.627195	-0.6756
AGK	YDL127W	0.326141	-1.2035
AGK	YDL129W	1.01606	-0.739287
AGK	YDL131W	1.84395	0.424463
AGK	YDL133W	0.48294	-0.533838
AGK	YDL134C	1.63698	0.547989
AGK	YDL134C-A	0.282238	-1.46119
AGK	YDL135C	1.04114	-0.357679
AGK	YDL136W	1.17285	1.09273
AGK	YDL137W	4.35901	0.262625
AGK	YDL138W	3.89488	-0.380443
AGK	YDL142C	4.14576	0.681595
AGK	YDL146W	1.21676	-0.0747084
AGK	YDL149W	0.965881	-1.18668
AGK	YDL154W	7.64551	-0.0787523
AGK	YDL155W	5.04265	0.0379849
AGK	YDL156W	8.02183	0.535375
AGK	YDL157C	2.64676	-0.384182
AGK	YDL161W	2.89764	-0.772066
AGK	YDL162C	0.783994	0.876004
AGK	YDL167C	6.27822	0.681493
AGK	YDL168W	8.75564	3.16942
AGK	YDL169C	2.07602	-0.723778
AGK	YDL170W	6.25941	0.929457
AGK	YDL171C	8.05946	2.17892
AGK	YDL173W	1.42373	1.10994
AGK	YDL174C	8.6992	1.14192
AGK	YDL176W	9.69644	0.0239668
AGK	YDL177C	12.8512	2.4071
AGK	YDL178W	4.99875	0.689019
AGK	YDL179W	4.60988	1.56141
AGK	YDL180W	10.4052	0.640253
AGK	YDL182W	8.37933	1.03795
AGK	YDL183C	0.413949	-1.21214
AGK	YDL184C	6.55419	0.979016
AGK	YDL186W	9.35148	2.16446
AGK	YDL187C	6.02107	0.770996
AGK	YDL188C	3.96387	0.929887
AGK	YDL189W	5.96463	1.08558
AGK	YDL190C	2.93527	0.380043
AGK	YDL197C	2.30808	1.38264
AGK	YDL199C	4.91094	2.10618
AGK	YDL200C	2.25163	-0.194472
AGK	YDL201W	2.15755	0.0768033
AGK	YDL203C	4.87331	1.25908
AGK	YDL204W	2.58404	-0.34514
AGK	YDL206W	4.84822	1.38273
AGK	YDL210W	3.66909	1.10025
AGK	YDL211C	1.55544	0.540754
AGK	YDL213C	0.413949	0.284706
AGK	YDL215C	5.55695	1.60226
AGK	YDL216C	0.169343	-0.397406
AGK	YDL218W	5.87682	1.65401
AGK	YDL219W	1.83141	-0.299453
AGK	YDL222C	8.24134	1.60484
AGK	YDL223C	3.85098	2.2271
AGK	YDL224C	4.28374	1.28783
AGK	YDL225W	2.89137	1.60803
AGK	YDL226C	1.28575	0.374293
AGK	YDL227C	4.44054	-0.007597
AGK	YDL230W	1.44882	-0.944172
AGK	YDL231C	5.06774	1.40188
AGK	YDL233W	4.17712	0.298259
AGK	YDL234C	7.98419	3.89828
AGK	YDL236W	1.63698	-0.713406
AGK	YDL237W	1.01606	-0.466114
AGK	YDL238C	0.696187	-0.765133
AGK	YDL239C	2.58404	0.929302
AGK	YDL240W	2.59659	0.982211
AGK	YDL241W	1.96939	0.749693
AGK	YDL242W	4.9423	0.562884
AGK	YDL243C	4.428	1.57653
AGK	YDR001C	1.80632	-0.363144
AGK	YDR003W	0.896889	-0.989164
AGK	YDR004W	0.0125439	-0.722474
AGK	YDR005C	0.671099	-0.193203
AGK	YDR006C	5.54441	0.575091
AGK	YDR009W	0.702459	-1.52989
AGK	YDR010C	4.34019	1.07427
AGK	YDR011W	1.8565	-0.290657
AGK	YDR014W	1.51154	1.44249
AGK	YDR015C	2.76593	0.974174
AGK	YDR018C	4.86703	2.3051
AGK	YDR019C	7.23156	2.10324
AGK	YDR022C	3.43076	0.094789
AGK	YDR026C	1.35474	-1.22796
AGK	YDR028C	0.589563	-0.725041
AGK	YDR029W	3.04817	-0.198076
AGK	YDR030C	5.03011	1.43857
AGK	YDR031W	1.74987	-0.741961
AGK	YDR032C	1.66207	0.137091
AGK	YDR033W	1.23557	-1.22887
AGK	YDR034C	0.602107	-0.592331
AGK	YDR035W	1.89413	-0.879062
AGK	YDR036C	0.0752634	-1.55747
AGK	YDR042C	4.2273	1.40772
AGK	YDR043C	1.28575	-0.423606
AGK	YDR046C	4.74787	1.36941
AGK	YDR055W	1.21676	0.606784
AGK	YDR056C	4.49699	2.43024
AGK	YDR059C	1.27948	-0.323076
AGK	YDR061W	1.04114	-0.475284
AGK	YDR063W	0.608379	-0.766798
AGK	YDR066C	1.11014	-0.709357
AGK	YDR067C	3.43703	-0.250183
AGK	YDR068W	0.783994	-0.936526
AGK	YDR070C	1.48645	0.296568
AGK	YDR073W	2.43979	0.833677
AGK	YDR077W	2.96036	2.53402
AGK	YDR078C	0.395133	-0.741542
AGK	YDR084C	1.45509	1.04078
AGK	YDR085C	0.915705	-0.464875
AGK	YDR089W	2.35198	-0.550301
AGK	YDR090C	1.70597	-0.0178211
AGK	YDR092W	0.00627195	-0.361339
AGK	YDR093W	0.119167	-0.998319
AGK	YDR094W	1.27948	-0.10108
AGK	YDR096W	2.81611	1.81037
AGK	YDR097C	2.18264	0.44953
AGK	YDR098C	1.63698	0.86219
AGK	YDR099W	2.24536	1.27518
AGK	YDR102C	0.25715	-0.919901
AGK	YDR104C	0.978424	-0.303529
AGK	YDR105C	0.0188159	-1.00248
AGK	YDR107C	2.73457	1.16103
AGK	YDR108W	2.38961	1.65967
AGK	YDR109C	3.31786	2.77882
AGK	YDR111C	1.11014	0.586767
AGK	YDR112W	2.67185	0.271676
AGK	YDR117C	1.86904	1.73421
AGK	YDR119W	0.890617	-1.21493
AGK	YDR121W	1.68088	2.54818
AGK	YDR122W	3.94506	1.49845
AGK	YDR123C	1.13522	-1.65054
AGK	YDR124W	2.1011	0.0246901
AGK	YDR128W	0.790266	-0.530285
AGK	YDR130C	0.758906	-0.529599
AGK	YDR131C	1.05996	-0.102731
AGK	YDR132C	1.40492	0.851383
AGK	YDR133C	3.4433	0.952179
AGK	YDR134C	2.26417	-0.16029
AGK	YDR135C	1.87531	0.865443
AGK	YDR136C	0.432765	0.0214224
AGK	YDR139C	0.972153	-0.427025
AGK	YDR142C	0.294782	-0.618203
AGK	YDR143C	0.370045	-1.6636
AGK	YDR144C	0.401405	-0.676284
AGK	YDR146C	1.01606	-0.431087
AGK	YDR147W	0.0313598	-0.605138
AGK	YDR151C	0.156799	-1.10475
AGK	YDR152W	2.929	1.28844
AGK	YDR153C	0.508028	-1.08851
AGK	YDR155C	0.232062	0.0420512
AGK	YDR157W	1.45509	1.0123
AGK	YDR162C	1.88159	1.98424
AGK	YDR163W	0.0815354	-0.74925
AGK	YDR165W	0.0125439	-0.698432
AGK	YDR169C	0.689915	-0.444073
AGK	YDR171W	3.81335	1.41746
AGK	YDR179W-A	0.0250878	-0.78743
AGK	YDR181C	0.896889	0.148905
AGK	YDR183W	0.921977	0.769395
AGK	YDR185C	0.972153	0.227478
AGK	YDR191W	3.85098	2.52147
AGK	YDR192C	1.59308	0.700594
AGK	YDR193W	1.71224	0.847416
AGK	YDR197W	1.25439	1.5251
AGK	YDR198C	1.23557	1.23078
AGK	YDR202C	0.00627195	-1.33248
AGK	YDR203W	0.0313598	-0.811841
AGK	YDR204W	0.213246	-0.261375
AGK	YDR205W	0.407677	-1.33055
AGK	YDR206W	0.721274	0.0041918
AGK	YDR209C	0.696187	0.952358
AGK	YDR210W	0.489212	-0.734894
AGK	YDR213W	0.765178	0.0434181
AGK	YDR214W	0.865529	-0.450339
AGK	YDR215C	0.28851	-0.15156
AGK	YDR216W	0.915705	0.237848
AGK	YDR217C	0.671099	0.679949
AGK	YDR220C	0.501756	-0.184931
AGK	YDR222W	0.0313598	-1.11301
AGK	YDR223W	1.17913	-0.104893
AGK	YDR225W	1.45509	2.60918
AGK	YDR229W	0.00627195	-1.61108
AGK	YDR233C	2.929	1.40834
AGK	YDR239C	0.301054	-1.33498
AGK	YDR244W	0.194431	-0.915954
AGK	YDR247W	0.871801	-0.0529106
AGK	YDR248C	1.09759	0.798377
AGK	YDR249C	0.338685	-0.451637
AGK	YDR250C	0.658555	0.0668299
AGK	YDR251W	0.357501	-0.537526
AGK	YDR252W	0.915705	0.143574
AGK	YDR253C	0.00627195	-0.734962
AGK	YDR255C	0.0250878	-0.664939
AGK	YDR256C	3.31159	3.47193
AGK	YDR257C	0.859257	0.10265
AGK	YDR258C	0.57702	-0.583707
AGK	YDR259C	1.16658	0.40326
AGK	YDR260C	0.244606	-0.143965
AGK	YDR261C	0.715003	-0.281385
AGK	YDR262W	0.0313598	-0.927845
AGK	YDR263C	0.00627195	-1.31351
AGK	YDR265W	0.401405	-0.314889
AGK	YDR268W	0.77145	0.565195
AGK	YDR269C	1.25439	-0.782325
AGK	YDR271C	0.501756	-0.680214
AGK	YDR272W	0.194431	-1.07337
AGK	YDR273W	1.27321	0.470904
AGK	YDR274C	0.326141	0.155659
AGK	YDR275W	0.646011	0.0626452
AGK	YDR276C	0.219518	-0.00108592
AGK	YDR277C	0.25715	-0.0431854
AGK	YDR279W	1.11014	3.73641
AGK	YDR282C	1.1415	3.00176
AGK	YDR284C	0.0250878	-0.674227
AGK	YDR285W	0.144255	-0.16076
AGK	YDR286C	0.583292	0.0154379
AGK	YDR287W	0.156799	-0.546462
AGK	YDR290W	1.14777	-0.756278
AGK	YDR291W	0.313598	-0.613019
AGK	YDR297W	1.05996	-0.628562
AGK	YDR298C	0.00627195	-0.912087
AGK	YDR304C	0.602107	-0.0939926
AGK	YDR306C	0.0815354	-0.828261
AGK	YDR312W	0.54566	-0.0145882
AGK	YDR313C	1.5429	2.36892
AGK	YDR314C	1.33593	1.08539
AGK	YDR316W	0.539388	0.34582
AGK	YDR319C	1.34847	1.74846
AGK	YDR321W	1.13522	1.28732
AGK	YDR322W	0.344957	0.89082
AGK	YDR326C	0.332413	-1.13053
AGK	YDR329C	0.57702	0.567086
AGK	YDR334W	0.301054	0.99377
AGK	YEL001C	1.83768	0.679968
AGK	YEL004W	3.03562	1.92737
AGK	YEL005C	0.0815354	-0.954625
AGK	YEL006W	0.909433	1.05531
AGK	YEL009C	0.00627195	-0.497883
AGK	YEL010W	3.71927	1.79959
AGK	YEL011W	1.28575	-0.726323
AGK	YEL012W	1.12895	-0.514468
AGK	YEL014C	0.984696	-0.254095
AGK	YEL015W	0.00627195	-1.24585
AGK	YEL016C	1.03487	-0.256962
AGK	YEL017C-A	0.301054	-0.687811
AGK	YEL023C	2.70948	2.94757
AGK	YEL025C	3.04817	2.3566
AGK	YEL028W	0.232062	-1.50009
AGK	YEL030W	0.589563	-0.573649
AGK	YEL037C	0.238334	-0.723019
AGK	YEL038W	0.338685	-0.791968
AGK	YEL039C	0.501756	-0.283329
AGK	YEL040W	2.39589	0.975447
AGK	YEL041W	0.426493	-1.50283
AGK	YEL042W	0.00627195	-1.30988
AGK	YEL043W	0.558204	-0.518088
AGK	YEL047C	2.40216	-0.225568
AGK	YEL048C	0.884345	-0.911416
AGK	YEL049W	0.5143	-0.99143
AGK	YEL052W	0.702459	-1.21104
AGK	YEL053C	1.0286	-0.206169
AGK	YEL056W	1.98194	0.690028
AGK	YEL057C	0.990968	-0.478275
AGK	YEL059W	2.96663	0.90396
AGK	YEL062W	1.2293	-0.370821
AGK	YEL063C	1.499	0.1849
AGK	YEL064C	0.652283	-0.107536
AGK	YEL065W	0.608379	-1.05961
AGK	YEL066W	1.43628	-0.0197404
AGK	YEL067C	2.45861	-0.086866
AGK	YEL068C	2.87255	0.39272
AGK	YEL071W	2.82238	0.921078
AGK	YER001W	1.41746	-0.419908
AGK	YER002W	0.0689915	-0.490498
AGK	YER005W	1.63698	1.16528
AGK	YER007C-A	1.99448	1.47371
AGK	YER007W	0.426493	-0.387879
AGK	YER011W	0.570748	-0.504707
AGK	YER020W	3.79453	1.78592
AGK	YER024W	1.41119	-0.116216
AGK	YER028C	1.96939	0.613921
AGK	YER030W	0.99724	-0.63725
AGK	YER032W	1.74987	2.48402
AGK	YER033C	0.80281	0.581596
AGK	YER034W	1.23557	0.327123
AGK	YER038W-A	1.62444	0.712706
AGK	YER039C	0.0689915	-0.779327
AGK	YER040W	0.401405	0.219168
AGK	YER041W	0.608379	0.184962
AGK	YER042W	0.57702	-0.828274
AGK	YER044C-A	3.88234	1.62397
AGK	YER046W	1.69343	-1.09754
AGK	YER046W-A	0.457852	-0.195414
AGK	YER047C	0.0439037	-0.370488
AGK	YER048C	0.294782	-0.620092
AGK	YER049W	1.52408	0.161814
AGK	YER051W	0.125439	-0.339525
AGK	YER053C	0.570748	-0.491218
AGK	YER055C	0.451581	-1.11091
AGK	YER056C	2.52132	1.37356
AGK	YER057C	2.1701	0.120041
AGK	YER059W	2.77847	0.38804
AGK	YER060W	3.93879	1.59432
AGK	YER060W-A	0.852985	-0.464147
AGK	YER062C	0.0188159	-1.10822
AGK	YER063W	3.48721	1.51862
AGK	YER064C	3.23006	1.21603
AGK	YER065C	0.376317	-1.05943
AGK	YER066C-A	0.294782	1.67611
AGK	YER066W	1.51781	-0.213323
AGK	YER067C-A	1.28575	-0.245971
AGK	YER067W	0.200702	-0.943254
AGK	YER071C	1.31084	-0.141578
AGK	YER073W	2.6844	0.541293
AGK	YER074W	0.00627195	-0.212309
AGK	YER075C	0.646011	-0.765139
AGK	YER078C	1.72479	0.987661
AGK	YER079W	0.639739	-0.622161
AGK	YER080W	1.76869	0.815336
AGK	YER081W	1.02233	-0.0288835
AGK	YER084W	0.702459	0.923203
AGK	YER085C	0.846713	-0.558702
AGK	YER087C-A	0.439037	-0.817301
AGK	YER089C	0.00627195	-1.33748
AGK	YER093C-A	0.495484	-1.24509
AGK	YER096W	1.19167	-0.768339
AGK	YER097W	0.0250878	-1.16243
AGK	YER098W	3.86979	0.541169
AGK	YER101C	0.275966	-0.518357
AGK	YER103W	0.664827	-0.192746
AGK	YER106W	1.2293	-0.0797725
AGK	YER108C	1.04114	0.818277
AGK	YER109C	1.26693	-0.00751986
AGK	YER113C	0.526844	-0.0573978
AGK	YER114C	0.0501756	-1.2534
AGK	YER115C	1.04114	-0.213221
AGK	YER121W	0.00627195	-1.48749
AGK	YER128W	1.6558	0.624215
AGK	YER129W	1.31084	0.749504
AGK	YER132C	2.45233	0.821635
AGK	YER134C	0.890617	0.298767
AGK	YER135C	0.194431	-0.42316
AGK	YER137C	0.395133	-0.564507
AGK	YER138C-A	0.570748	-0.153624
AGK	YER140W	0.658555	-1.03945
AGK	YER141W	1.94431	1.48061
AGK	YER142C	0.00627195	-1.451
AGK	YER145C-A	0.00627195	-1.41906
AGK	YER146W	0.326141	-0.537707
AGK	YER148W	0.871801	-0.130478
AGK	YER153C	0.00627195	-1.2759
AGK	YER155C	0.106623	-0.834168
AGK	YER156C	0.00627195	-0.948724
AGK	YER157W	0.903161	-0.240376
AGK	YER158C	0.501756	-0.665529
AGK	YER160C	0.31987	-1.7174
AGK	YER160C-A	0.00627195	-1.23676
AGK	YER163C	0.733818	-0.444534
AGK	YER165C-A	0.00627195	-0.975555
AGK	YER168C	0.181887	-0.860226
AGK	YER171W	0.821626	-0.692245
AGK	YER172C	2.57777	1.25231
AGK	YER172C-A	0.633467	-0.557634
AGK	YER174C	2.96036	2.17629
AGK	YER175C	0.821626	-0.22198
AGK	YER176W	1.87531	1.6132
AGK	YER177W	2.76593	2.5227
AGK	YER178W	1.46136	0.765244
AGK	YER180C	0.363773	-0.178314
AGK	YER184C	1.76242	1.12721
AGK	YER185W	1.5429	-0.151893
AGK	YER186C	1.12895	1.01756
AGK	YER187W	0.947065	0.167379
AGK	YHL002W	1.3861	-1.82705
AGK	YHL003C	11.5153	2.09472
AGK	YHL005C	0.915705	0.477356
AGK	YHL006C	0.558204	-0.409186
AGK	YHL007C	0.777722	2.48452
AGK	YHL008C	0.915705	-0.431842
AGK	YHL009C	1.37983	0.742533
AGK	YHL010C	1.57426	-0.0396165
AGK	YHL012W	0.382589	-0.690214
AGK	YHL013C	0.31987	-0.568274
AGK	YHL014C	3.0419	0.540988
AGK	YHL016C	0.595835	0.152725
AGK	YHL017W	0.464124	-0.515161
AGK	YHL021C	1.36729	0.799559
AGK	YHL022C	0.439037	-0.59797
AGK	YHL024W	1.96939	0.901526
AGK	YHL026C	0.282238	-1.0803
AGK	YHL027W	0.00627195	-1.31043
AGK	YHL028W	1.62444	0.937917
AGK	YHL029C	2.70948	-0.06341
AGK	YHL030W	2.67812	2.1272
AGK	YHL032C	1.16031	0.530167
AGK	YHL034C	1.1415	0.620806
AGK	YHL036W	1.05996	0.435708
AGK	YHL037C	0.652283	0.00355076
AGK	YHL038C	1.64952	1.8653
AGK	YHL039W	3.01681	1.8557
AGK	YHL041W	0.708731	-0.560056
AGK	YHL042W	1.25439	-0.618557
AGK	YHL043W	2.00702	0.141711
AGK	YHL044W	0.74009	1.03689
AGK	YHL045W	0.420221	-1.09393
AGK	YHL046C	0.163071	-0.617992
AGK	YHL047C	2.67185	1.18087
AGK	YHR001W-A	1.20421	0.432192
AGK	YHR003C	4.04541	0.60332
AGK	YHR006W	1.25439	-0.959756
AGK	YHR009C	0.80281	-0.907867
AGK	YHR014W	0.294782	-0.272813
AGK	YHR015W	0.48294	-1.05346
AGK	YHR016C	2.31435	0.0969979
AGK	YHR017W	0.420221	-0.258548
AGK	YHR018C	3.88234	2.47445
AGK	YHR022C	1.93803	1.15127
AGK	YHR028C	2.6844	0.625346
AGK	YHR030C	0.0689915	0.341876
AGK	YHR032W	0.947065	-0.161653
AGK	YHR033W	1.99448	-0.0568901
AGK	YHR035W	4.37155	0.869179
AGK	YHR037W	2.214	1.92822
AGK	YHR039C	0.796538	1.71799
AGK	YHR043C	0.00627195	-1.44445
AGK	YHR044C	1.2293	0.537141
AGK	YHR045W	2.76593	0.78544
AGK	YHR046C	0.181887	0.0577575
AGK	YHR047C	1.91295	1.69579
AGK	YHR048W	0.31987	1.15521
AGK	YHR049C-A	1.05369	0.132526
AGK	YHR049W	0.533116	-0.753101
AGK	YHR057C	1.84395	1.63479
AGK	YHR061C	1.05369	0.481893
AGK	YHR073W	0.80281	-0.452751
AGK	YHR075C	1.00351	0.503503
AGK	YHR076W	0.188159	-0.715413
AGK	YHR077C	0.539388	-0.00135527
AGK	YHR078W	1.05996	0.208831
AGK	YHR082C	0.401405	-0.778561
AGK	YHR086W	2.80983	1.08831
AGK	YHR087W	0.413949	-0.545913
AGK	YHR092C	0.413949	-0.664382
AGK	YHR093W	3.69418	3.28734
AGK	YHR094C	1.86904	0.751069
AGK	YHR095W	0.526844	-0.725683
AGK	YHR096C	0.370045	-0.406201
AGK	YHR097C	0.721274	-0.235867
AGK	YHR103W	0.395133	-0.0849663
AGK	YHR104W	1.56799	2.34162
AGK	YHR105W	0.77145	-0.0382311
AGK	YHR106W	1.01606	0.255099
AGK	YHR108W	0.0313598	-0.874685
AGK	YHR110W	0.294782	-0.928712
AGK	YHR112C	0.00627195	-1.48124
AGK	YHR113W	1.83141	1.69259
AGK	YHR114W	0.00627195	-1.1444
AGK	YHR115C	0.464124	-0.225109
AGK	YHR116W	0.00627195	-0.930546
AGK	YHR117W	1.24812	1.21113
AGK	YHR121W	2.11992	0.653293
AGK	YHR123W	0.884345	-0.0698065
AGK	YHR124W	0.238334	-1.04061
AGK	YHR126C	1.51154	0.459897
AGK	YHR127W	6.5291	2.0928
AGK	YHR130C	5.2998	4.06929
AGK	YHR131C	2.32062	0.282681
AGK	YHR132C	0.106623	-1.19121
AGK	YHR133C	0.464124	-0.19723
AGK	YHR136C	1.09759	0.554516
AGK	YHR137W	0.301054	-0.778917
AGK	YHR138C	0.896889	-0.86201
AGK	YHR139C	0.250878	-1.01079
AGK	YHR139C-A	2.46488	1.3888
AGK	YHR140W	1.04114	-0.0954929
AGK	YHR142W	0.978424	2.23147
AGK	YHR146W	2.03211	1.09491
AGK	YHR150W	1.14777	0.919097
AGK	YHR152W	0.282238	-1.0331
AGK	YHR155W	0.31987	-1.03842
AGK	YHR156C	1.66834	2.13602
AGK	YHR157W	0.370045	-0.366174
AGK	YHR158C	0.758906	-0.430903
AGK	YHR159W	0.489212	-0.077309
AGK	YHR160C	0.439037	-0.738902
AGK	YHR163W	1.51781	2.28815
AGK	YHR171W	0.984696	-0.169484
AGK	YHR177W	1.82514	0.984993
AGK	YHR179W	0.99724	0.850916
AGK	YHR180W	3.09834	0.555915
AGK	YHR181W	0.5143	-0.811968
AGK	YHR182W	0.702459	-0.340877
AGK	YHR184W	2.1011	1.04306
AGK	YHR185C	0.388861	-1.74156
AGK	YHR189W	0.984696	0.231216
AGK	YHR195W	0.144255	-0.743122
AGK	YHR198C	0.878073	-0.326932
AGK	YHR199C	1.80632	1.87579
AGK	YHR200W	0.80281	0.543269
AGK	YHR202W	2.03211	1.57301
AGK	YHR204W	3.38058	4.06305
AGK	YHR206W	0.269694	-0.763133
AGK	YHR209W	0.74009	-0.477537
AGK	YHR210C	0.0439037	-1.14417
AGK	YIL001W	0.376317	-0.653764
AGK	YIL002C	0.884345	0.209547
AGK	YIL006W	3.34922	1.20219
AGK	YIL007C	0.22579	-1.35327
AGK	YIL009W	3.10462	-0.287441
AGK	YIL010W	4.86076	0.242607
AGK	YIL013C	1.35474	0.179522
AGK	YIL025C	0.112895	0.306952
AGK	YIL028W	0.28851	-0.636863
AGK	YIL029C	1.91295	2.18159
AGK	YIL032C	0.28851	-0.609692
AGK	YIL035C	0.188159	1.77774
AGK	YIL036W	0.432765	-0.348695
AGK	YIL038C	4.50953	-0.540085
AGK	YIL042C	0.758906	-0.16695
AGK	YIL043C	0.131711	-0.414202
AGK	YIL045W	0.282238	-0.80714
AGK	YIL050W	1.01606	-0.473916
AGK	YIL052C	0.959609	-0.00571538
AGK	YIL054W	0.683643	-0.537
AGK	YIL055C	2.53387	0.415806
AGK	YIL056W	6.46638	1.0817
AGK	YIL059C	5.60712	1.91049
AGK	YIL060W	0.501756	0.722485
AGK	YIL066C	0.206974	-1.58992
AGK	YIL070C	2.58404	0.146329
AGK	YIL071C	0.821626	-1.59534
AGK	YIL072W	0.388861	-0.187089
AGK	YIL073C	2.60913	0.711964
AGK	YIL074C	5.11791	0.580579
AGK	YIL077C	0.570748	-0.246841
AGK	YIL085C	1.29202	-0.805755
AGK	YIL086C	1.31084	0.123564
AGK	YIL087C	2.39589	0.117958
AGK	YIL088C	1.58053	-0.439926
AGK	YIL089W	2.83492	-0.840266
AGK	YIL090W	0.689915	-0.128861
AGK	YIL092W	2.79729	-0.194914
AGK	YIL093C	0.144255	-0.312818
AGK	YIL094C	0.508028	-0.0233172
AGK	YIL095W	0.439037	-0.999738
AGK	YIL096C	0.646011	-0.422156
AGK	YIL098C	1.71224	0.0350812
AGK	YIL099W	2.06347	0.237644
AGK	YIL100W	0.0940793	-0.369446
AGK	YIL101C	0.689915	-0.190984
AGK	YIL102C	0.169343	-0.622088
AGK	YIL108W	3.90115	1.35921
AGK	YIL114C	2.03211	0.0385483
AGK	YIL116W	0.0188159	-0.456774
AGK	YIL117C	2.85374	1.6148
AGK	YIL120W	8.36678	1.48092
AGK	YIL121W	0.489212	-0.320572
AGK	YIL123W	0.733818	0.0701524
AGK	YIL124W	0.294782	-1.20808
AGK	YIL125W	1.98194	2.76406
AGK	YIL130W	2.31435	0.466297
AGK	YIL131C	4.79804	3.14985
AGK	YIL132C	1.44882	-0.308213
AGK	YIL135C	0.539388	-0.824978
AGK	YIL137C	2.07602	0.113729
AGK	YIL138C	1.01606	0.0455268
AGK	YIL139C	0.0689915	-0.569725
AGK	YIL140W	3.75063	1.50513
AGK	YIL141W	0.652283	-1.26309
AGK	YIL145C	2.99799	1.1648
AGK	YIL146C	1.64952	-0.607811
AGK	YIL152W	1.44255	-0.527923
AGK	YIL156W	2.67812	0.746867
AGK	YIL157C	1.66207	0.625913
AGK	YIL158W	0.865529	0.107178
AGK	YIL159W	1.08505	-0.314329
AGK	YIL160C	2.82238	2.00196
AGK	YIL161W	0.00627195	-1.50298
AGK	YIL162W	2.38961	0.140577
AGK	YIL163C	1.34847	-0.782076
AGK	YIL164C	1.33593	-0.134586
AGK	YIL165C	0.865529	-1.09296
AGK	YIL166C	0.727546	-0.292062
AGK	YIL167W	1.31084	-0.408324
AGK	YIL168W	6.44757	1.75818
AGK	YIL170W	3.93251	0.469994
AGK	YIL173W	3.90115	0.48331
AGK	YIR001C	2.214	-0.231259
AGK	YIR002C	2.26417	1.52809
AGK	YIR003W	1.73106	-0.555828
AGK	YIR007W	4.82313	1.10947
AGK	YIR013C	2.23281	-0.636861
AGK	YIR014W	2.19518	-1.0028
AGK	YIR016W	7.68941	1.85554
AGK	YJL004C	1.24185	0.890079
AGK	YJL005W	1.12268	3.06453
AGK	YJL007C	2.30808	0.181867
AGK	YJL012C	1.32965	1.23286
AGK	YJL013C	0.508028	-1.1511
AGK	YJL016W	2.38961	-0.344188
AGK	YJL017W	1.56172	0.212023
AGK	YJL020C	0.00627195	-1.27908
AGK	YJL021C	0.00627195	-1.31568
AGK	YJL023C	0.426493	-0.292591
AGK	YJL024C	1.29202	1.57604
AGK	YJL027C	0.627195	-1.69337
AGK	YJL030W	1.86277	0.215797
AGK	YJL036W	4.65379	1.27383
AGK	YJL037W	6.55419	1.09215
AGK	YJL038C	4.04541	1.14897
AGK	YJL042W	6.26568	1.14539
AGK	YJL043W	4.30256	0.935148
AGK	YJL044C	2.3708	0.286334
AGK	YJL045W	3.2426	0.465299
AGK	YJL047C	0.846713	1.71055
AGK	YJL048C	3.83843	0.578905
AGK	YJL049W	3.02935	-0.289437
AGK	YJL051W	4.20221	-0.210635
AGK	YJL052W	0.614651	0.0848978
AGK	YJL053W	0.269694	-0.987683
AGK	YJL055W	2.22654	0.413221
AGK	YJL057C	0.696187	-1.07584
AGK	YJL058C	2.5715	-0.692009
AGK	YJL060W	3.19242	0.00492779
AGK	YJL064W	1.79378	-0.837358
AGK	YJL065C	1.23557	-0.247013
AGK	YJL066C	0.338685	-1.33396
AGK	YJL067W	1.80005	-0.228526
AGK	YJL068C	4.55971	1.13353
AGK	YJL070C	5.31234	1.89224
AGK	YJL071W	2.46488	0.481912
AGK	YJL077C	3.31786	-0.251442
AGK	YJL078C	1.48645	-0.473523
AGK	YJL079C	4.63497	1.58491
AGK	YJL082W	1.19167	-0.495325
AGK	YJL083W	1.81259	-1.18371
AGK	YJL084C	3.58128	0.203157
AGK	YJL089W	2.15128	0.175511
AGK	YJL093C	3.34922	0.464103
AGK	YJL094C	0.420221	-1.49829
AGK	YJL095W	0.457852	-0.565697
AGK	YJL098W	6.07752	2.03571
AGK	YJL099W	0.489212	-0.952267
AGK	YJL100W	4.57225	0.773511
AGK	YJL101C	1.26066	0.28751
AGK	YJL103C	2.79729	1.86006
AGK	YJL105W	1.21049	1.02125
AGK	YJL106W	2.07602	-1.03437
AGK	YJL107C	1.93176	-0.663032
AGK	YJL108C	0.00627195	-1.7794
AGK	YJL110C	3.34922	1.19278
AGK	YJL112W	1.20421	-0.790949
AGK	YJL116C	1.71851	-0.897227
AGK	YJL118W	2.97918	-0.0165788
AGK	YJL119C	3.58128	-0.0128188
AGK	YJL122W	4.50953	1.81173
AGK	YJL123C	0.382589	-1.76268
AGK	YJL126W	0.972153	-0.922589
AGK	YJL130C	0.269694	-0.637072
AGK	YJL132W	3.91997	1.15361
AGK	YJL133W	0.200702	-0.959144
AGK	YJL134W	1.01606	-1.4088
AGK	YJL135W	1.67461	-0.679039
AGK	YJL142C	2.42725	0.676478
AGK	YJL144W	1.06623	0.434834
AGK	YJL145W	0.00627195	-1.57487
AGK	YJL146W	0.639739	0.0795416
AGK	YJL148W	0.137983	-0.85237
AGK	YJL150W	1.08505	-0.370464
AGK	YJL152W	0.282238	-1.3837
AGK	YJL157C	0.978424	-0.141986
AGK	YJL158C	0.602107	-0.444879
AGK	YJL164C	0.570748	0.50114
AGK	YJL168C	0.0752634	-0.8085
AGK	YJL169W	0.890617	0.34487
AGK	YJL171C	1.48645	-0.135845
AGK	YJL177W	0.470396	0.811949
AGK	YJL181W	0.903161	-0.507276
AGK	YJL182C	2.22654	1.69378
AGK	YJL186W	0.658555	-0.660573
AGK	YJL187C	0.953337	-0.410522
AGK	YJL197W	1.30457	0.644559
AGK	YJL199C	0.301054	-0.529034
AGK	YJL206C-A	0.351229	-0.447666
AGK	YJL210W	1.60562	0.141395
AGK	YJL211C	1.94431	0.228574
AGK	YJL212C	2.38961	0.614344
AGK	YJL213W	1.27948	-0.233361
AGK	YJL214W	0.188159	-1.83249
AGK	YJL215C	2.10738	-0.0130436
AGK	YJL216C	0.213246	-1.57715
AGK	YJL218W	0.520572	-0.52343
AGK	YJR001W	1.41119	-0.142059
AGK	YJR003C	2.12619	0.835921
AGK	YJR004C	1.16031	-0.970793
AGK	YJR005W	0.677371	-0.530309
AGK	YJR008W	0.752634	-0.44922
AGK	YJR009C	0.865529	-0.943038
AGK	YJR010W	0.432765	-1.10586
AGK	YJR014W	1.23557	0.0935073
AGK	YJR015W	2.25163	0.459798
AGK	YJR019C	0.22579	-1.82747
AGK	YJR020W	3.26141	1.21191
AGK	YJR021C	1.59935	1.17073
AGK	YJR024C	2.35825	1.95882
AGK	YJR025C	2.86001	0.890271
AGK	YJR026W	0.683643	-0.597615
AGK	YJR030C	0.250878	-0.419967
AGK	YJR031C	1.80005	0.0381916
AGK	YJR035W	0.401405	-1.15553
AGK	YJR036C	1.28575	-0.248273
AGK	YJR037W	4.45309	0.861417
AGK	YJR038C	0.294782	-1.2142
AGK	YJR039W	0.959609	-0.0523529
AGK	YJR044C	0.307326	0.052702
AGK	YJR048W	0.407677	-1.06088
AGK	YJR050W	0.00627195	-1.00262
AGK	YJR051W	2.77847	-0.0421031
AGK	YJR052W	0.589563	-0.747949
AGK	YJR053W	0.664827	-0.706739
AGK	YJR054W	0.551932	-0.661199
AGK	YJR056C	3.06071	2.03544
AGK	YJR058C	1.35474	-0.448355
AGK	YJR059W	0.602107	0.425733
AGK	YJR061W	0.602107	-1.18553
AGK	YJR062C	1.61189	-0.377381
AGK	YJR066W	2.63422	1.07406
AGK	YJR069C	0.282238	-0.806896
AGK	YJR070C	0.00627195	-1.12145
AGK	YJR073C	0.382589	-0.430402
AGK	YJR075W	0.100351	-0.811033
AGK	YJR077C	0.558204	0.166198
AGK	YJR078W	4.7416	1.05075
AGK	YJR079W	0.175615	0.346349
AGK	YJR080C	1.30457	0.217272
AGK	YJR082C	5.95208	1.2437
AGK	YJR083C	0.275966	-1.01463
AGK	YJR084W	1.01606	-0.35244
AGK	YJR087W	2.58404	-0.487856
AGK	YJR088C	0.00627195	-0.74273
AGK	YJR091C	3.2426	0.635854
AGK	YJR092W	1.8565	-0.959592
AGK	YJR094C	4.71651	0.656071
AGK	YJR094W-A	1.37356	1.18751
AGK	YJR095W	3.11716	0.953379
AGK	YJR096W	2.06974	-1.09045
AGK	YJR097W	2.45233	0.461715
AGK	YJR098C	3.5562	-0.0603866
AGK	YJR099W	1.57426	-0.77808
AGK	YJR100C	3.83843	0.638624
AGK	YJR102C	0.326141	-0.660349
AGK	YJR103W	2.50251	2.7137
AGK	YJR106W	2.1011	0.235112
AGK	YJR107W	5.2998	1.74491
AGK	YJR108W	0.344957	-0.870173
AGK	YJR109C	6.24686	1.49716
AGK	YJR110W	1.63071	0.476127
AGK	YJR111C	0.232062	-0.461664
AGK	YJR115W	5.03011	1.46601
AGK	YJR116W	6.30958	1.79703
AGK	YJR117W	2.32689	-0.882529
AGK	YJR119C	2.19518	-0.0623205
AGK	YJR124C	1.58053	-0.0720896
AGK	YJR125C	0.0188159	-0.205075
AGK	YJR126C	0.470396	-0.813972
AGK	YJR127C	1.61189	-0.483579
AGK	YJR128W	0.746362	-1.02593
AGK	YJR130C	1.44255	0.127077
AGK	YJR131W	3.1297	-0.0811853
AGK	YJR133W	4.39664	0.295936
AGK	YJR134C	0.765178	-0.791093
AGK	YJR135C	0.432765	-0.196203
AGK	YJR137C	1.04742	-0.735962
AGK	YJR146W	1.31084	-1.05264
AGK	YJR147W	0.00627195	-1.56332
AGK	YJR148W	2.35198	-0.0706346
AGK	YJR149W	1.09759	0.0442267
AGK	YJR150C	5.52559	1.65025
AGK	YJR152W	2.11365	-0.0877511
AGK	YJR153W	7.72077	2.43146
AGK	YJR154W	1.01606	-0.209168
AGK	YLL001W	0.0313598	-0.868547
AGK	YLL006W	0.00627195	-0.561141
AGK	YLL007C	4.10813	-0.565966
AGK	YLL010C	0.150527	-0.762714
AGK	YLL012W	2.51505	1.0694
AGK	YLL013C	0.150527	-0.902861
AGK	YLL014W	0.620923	-0.057972
AGK	YLL015W	0.852985	0.0401788
AGK	YLL016W	2.05093	0.892239
AGK	YLL017W	3.94506	3.66963
AGK	YLL020C	0.533116	-0.359308
AGK	YLL021W	0.783994	0.638232
AGK	YLL023C	0.0439037	0.437442
AGK	YLL024C	3.84471	2.81832
AGK	YLL025W	0.0188159	1.69755
AGK	YLL026W	1.94431	1.0247
AGK	YLL028W	0.664827	-0.806744
AGK	YLL030C	0.595835	-1.32047
AGK	YLL032C	1.3422	-0.207987
AGK	YLL038C	0.620923	0.816978
AGK	YLL039C	0.5143	-0.343486
AGK	YLL040C	0.0689915	-0.236386
AGK	YLL042C	0.388861	-1.39682
AGK	YLL046C	5.32489	1.11414
AGK	YLL047W	4.51581	0.871968
AGK	YLL048C	2.96036	1.30006
AGK	YLL051C	1.61189	-0.392497
AGK	YLL052C	2.81611	0.792756
AGK	YLL053C	4.39037	1.39372
AGK	YLL054C	1.46136	-0.726636
AGK	YLL055W	3.70045	2.22265
AGK	YLL056C	1.59935	-0.355207
AGK	YLL057C	1.96312	0.15508
AGK	YLL058W	3.10462	-0.248907
AGK	YLL059C	3.97015	2.95219
AGK	YLL060C	5.58831	0.652942
AGK	YLL061W	7.65178	2.88419
AGK	YLL062C	1.37983	-0.218204
AGK	YLL063C	0.0313598	-1.36127
AGK	YLR001C	0.401405	-1.25647
AGK	YLR003C	0.815354	-0.513198
AGK	YLR004C	1.27321	-0.243144
AGK	YLR006C	1.42373	0.926744
AGK	YLR011W	1.73733	-0.199303
AGK	YLR012C	2.18891	0.469997
AGK	YLR013W	0.934521	-0.56388
AGK	YLR014C	0.871801	0.0303977
AGK	YLR015W	0.213246	-0.539405
AGK	YLR016C	0.752634	-0.686981
AGK	YLR017W	5.04265	1.9994
AGK	YLR018C	1.85023	1.29911
AGK	YLR019W	9.33894	0.676437
AGK	YLR020C	0.608379	-0.925056
AGK	YLR021W	0.263422	0.0331565
AGK	YLR023C	1.53663	0.755495
AGK	YLR024C	0.0188159	-1.38508
AGK	YLR025W	0.426493	-0.43326
AGK	YLR028C	1.87531	0.0436309
AGK	YLR030W	3.66909	1.26516
AGK	YLR031W	1.01606	-0.119236
AGK	YLR034C	2.03838	0.530289
AGK	YLR035C	0.163071	-1.19496
AGK	YLR036C	1.04742	-0.248956
AGK	YLR037C	2.92273	1.55658
AGK	YLR038C	0.921977	-0.0521579
AGK	YLR039C	0.589563	0.148222
AGK	YLR040C	1.42373	0.365364
AGK	YLR041W	0.928249	-0.738861
AGK	YLR042C	0.338685	-1.57648
AGK	YLR043C	0.852985	-0.404337
AGK	YLR044C	0.48294	-0.145569
AGK	YLR046C	0.570748	0.0718694
AGK	YLR047C	0.00627195	-1.47177
AGK	YLR049C	1.66207	1.59206
AGK	YLR050C	1.05996	-0.932285
AGK	YLR053C	0.25715	-0.541485
AGK	YLR054C	0.0689915	-0.734829
AGK	YLR057W	0.194431	-0.746107
AGK	YLR058C	0.0125439	-1.31187
AGK	YLR059C	0.00627195	-1.30274
AGK	YLR064W	2.05093	1.16314
AGK	YLR070C	1.86904	0.0353661
AGK	YLR072W	0.57702	-0.954064
AGK	YLR073C	1.59935	0.614887
AGK	YLR077W	6.54792	3.39323
AGK	YLR080W	2.32689	0.637463
AGK	YLR081W	1.57426	0.286692
AGK	YLR082C	2.01957	0.576365
AGK	YLR083C	0.54566	-0.352038
AGK	YLR084C	0.351229	-0.240497
AGK	YLR085C	0.28851	-0.346802
AGK	YLR089C	0.0313598	-0.930747
AGK	YLR092W	0.00627195	-0.909045
AGK	YLR093C	0.520572	1.0763
AGK	YLR094C	0.0815354	-0.456477
AGK	YLR095C	0.74009	-0.539468
AGK	YLR096W	1.11641	-0.146793
AGK	YLR097C	1.41119	0.127942
AGK	YLR098C	0.752634	-0.252329
AGK	YLR099C	0.301054	-0.960429
AGK	YLR104W	0.859257	-0.618481
AGK	YLR107W	1.53663	0.0857496
AGK	YLR108C	0.827898	-0.58892
AGK	YLR109W	0.508028	-0.629406
AGK	YLR110C	0.627195	-0.472872
AGK	YLR111W	0.181887	-0.720829
AGK	YLR112W	1.1854	-0.345284
AGK	YLR114C	1.63071	0.227052
AGK	YLR118C	0.0313598	-1.56399
AGK	YLR119W	0.564476	-0.991446
AGK	YLR120C	0.269694	-0.363594
AGK	YLR121C	2.05093	0.489467
AGK	YLR122C	1.11014	-0.971428
AGK	YLR123C	1.59935	-0.254498
AGK	YLR124W	1.24812	-0.0332989
AGK	YLR128W	0.188159	-0.705036
AGK	YLR130C	0.683643	-0.26313
AGK	YLR131C	0.00627195	-1.27559
AGK	YLR133W	0.984696	0.405276
AGK	YLR134W	0.00627195	-1.11943
AGK	YLR135W	0.940793	0.104621
AGK	YLR136C	0.57702	0.0661796
AGK	YLR137W	0.990968	-0.381504
AGK	YLR138W	0.639739	0.0352717
AGK	YLR142W	1.86277	0.838504
AGK	YLR143W	0.439037	0.596359
AGK	YLR144C	0.677371	0.0833622
AGK	YLR150W	0.106623	-0.689787
AGK	YLR151C	1.1415	0.367401
AGK	YLR152C	0.407677	-0.773808
AGK	YLR154C	1.01606	1.10784
AGK	YLR164W	0.696187	-0.481078
AGK	YLR165C	1.10386	0.679366
AGK	YLR168C	0.520572	0.488728
AGK	YLR170C	0.351229	-0.455181
AGK	YLR171W	0.332413	-0.698782
AGK	YLR173W	0.382589	-0.588257
AGK	YLR174W	0.664827	0.0416447
AGK	YLR176C	0.821626	0.311914
AGK	YLR177W	0.156799	-1.23597
AGK	YLR178C	1.01606	-0.0264034
AGK	YLR183C	1.73733	2.12731
AGK	YLR187W	1.04114	0.489811
AGK	YLR188W	0.388861	-0.884508
AGK	YLR189C	0.77145	-0.207779
AGK	YLR191W	0.275966	-0.635824
AGK	YLR192C	4.19594	1.04155
AGK	YLR193C	0.878073	1.31761
AGK	YLR194C	0.702459	0.244312
AGK	YLR199C	0.338685	-0.40439
AGK	YLR201C	1.1415	1.39486
AGK	YLR206W	0.965881	1.20117
AGK	YLR207W	0.903161	-0.258246
AGK	YLR209C	0.583292	-1.03748
AGK	YLR210W	2.2579	1.2282
AGK	YLR211C	2.62795	2.69991
AGK	YLR213C	1.99448	1.69125
AGK	YLR214W	1.03487	1.64267
AGK	YLR219W	0.48294	-0.402394
AGK	YLR220W	1.40492	0.951345
AGK	YLR224W	0.689915	-0.795198
AGK	YLR225C	1.13522	-0.0593713
AGK	YLR227C	1.44255	1.57344
AGK	YLR451W	0.815354	0.993747
AGK	YML001W	1.23557	0.465183
AGK	YML002W	1.3422	0.850381
AGK	YML003W	2.23281	2.31269
AGK	YML004C	0.282238	-1.04239
AGK	YML006C	0.840442	0.000203626
AGK	YML007W	1.93176	1.46643
AGK	YML009c	0.915705	-1.13635
AGK	YML011C	1.499	-0.978289
AGK	YML012W	0.28851	-0.775236
AGK	YML016C	0.363773	-0.155456
AGK	YML017W	1.1854	-0.716146
AGK	YML018C	0.100351	-0.621484
AGK	YML019W	2.5715	1.4923
AGK	YML020W	1.12895	0.265764
AGK	YML022W	2.12619	1.22896
AGK	YML024W	0.457852	1.44072
AGK	YML027W	1.05996	0.122927
AGK	YML028W	0.671099	0.513759
AGK	YML029W	1.5429	0.137348
AGK	YML030W	0.00627195	-0.697321
AGK	YML031W	0.746362	-1.71059
AGK	YML032C-A	0.0250878	-1.3101
AGK	YML036W	5.04265	0.130227
AGK	YML037C	0.564476	-1.13046
AGK	YML038C	0.758906	-1.01437
AGK	YML048W	0.677371	-0.00539101
AGK	YML050W	1.46136	-0.373544
AGK	YML051W	0.733818	-1.00611
AGK	YML052W	2.96663	1.27409
AGK	YML053C	0.263422	-1.35492
AGK	YML054C	0.432765	-1.00436
AGK	YML055W	0.00627195	-1.20523
AGK	YML056C	0.790266	-0.38202
AGK	YML058C-A	0.00627195	-1.36079
AGK	YML059C	0.620923	-0.587092
AGK	YML060W	0.332413	-0.586149
AGK	YML062C	0.200702	-0.868189
AGK	YML066C	1.59935	-0.725268
AGK	YML067C	0.451581	1.24209
AGK	YML068W	1.32338	-0.102611
AGK	YML070W	0.727546	-0.804121
AGK	YML071C	1.23557	0.364488
AGK	YML074C	2.46488	0.578902
AGK	YML076C	0.00627195	-1.31381
AGK	YML078W	2.81611	0.565557
AGK	YML079W	2.82238	0.0593787
AGK	YML080W	0.426493	-0.721784
AGK	YML081W	0.815354	-0.880737
AGK	YML082W	2.48996	0.363307
AGK	YML083C	0.796538	-0.763571
AGK	YML084W	2.91646	0.701078
AGK	YML087C	2.55896	0.282328
AGK	YML088W	1.02233	-0.735985
AGK	YML089C	2.0133	-0.0444151
AGK	YML095C	1.45509	-0.201241
AGK	YML096W	2.32689	1.25637
AGK	YML099C	1.27948	0.529534
AGK	YML100W	0.57702	-0.574619
AGK	YML100W-A	0.83417	-0.338538
AGK	YML101C	5.93954	2.75582
AGK	YML103C	0.890617	1.2068
AGK	YML104C	0.551932	-1.09475
AGK	YML106W	0.181887	-1.16847
AGK	YML107C	5.24335	3.09678
AGK	YML109W	2.93527	0.551864
AGK	YML110C	0.407677	-0.811814
AGK	YML111W	5.33116	2.67636
AGK	YML115C	0.370045	-0.181014
AGK	YML116W	1.34847	-0.702501
AGK	YML117W-A	0.708731	-0.484656
AGK	YML118W	0.972153	0.29477
AGK	YML119W	1.29202	-0.0856349
AGK	YML120C	0.947065	-0.67944
AGK	YML122C	1.75615	0.211073
AGK	YML123C	1.52408	-0.410022
AGK	YML124C	0.595835	0.833886
AGK	YML129C	2.17637	2.29108
AGK	YML131W	3.17988	2.01679
AGK	YMR002W	0.633467	-0.00201199
AGK	YMR003W	0.48294	-0.418471
AGK	YMR004W	1.19167	0.457109
AGK	YMR006C	1.75615	-0.237135
AGK	YMR007W	1.58053	-0.169701
AGK	YMR008C	0.0250878	-1.55916
AGK	YMR009W	1.42373	0.0948445
AGK	YMR010W	1.48645	0.197668
AGK	YMR011W	1.46136	0.878817
AGK	YMR012W	0.865529	-0.608085
AGK	YMR015C	0.489212	-0.855544
AGK	YMR016C	1.30457	0.303531
AGK	YMR017W	1.68716	0.552283
AGK	YMR018W	0.508028	-0.848925
AGK	YMR019W	1.78123	0.283497
AGK	YMR020W	1.90667	0.545359
AGK	YMR022W	2.4147	-0.127566
AGK	YMR023C	0.338685	-0.744859
AGK	YMR025W	1.73733	2.22597
AGK	YMR026C	0.00627195	-0.607777
AGK	YMR027W	2.36453	1.479
AGK	YMR029C	0.884345	1.04966
AGK	YMR030W	0.22579	0.081168
AGK	YMR031C	0.0439037	-1.04532
AGK	YMR034C	1.21676	-0.47699
AGK	YMR040W	1.88786	0.339465
AGK	YMR041C	0.370045	-1.0993
AGK	YMR042W	1.09759	0.527015
AGK	YMR044W	0.144255	-0.338599
AGK	YMR048W	3.30532	3.0522
AGK	YMR095C	0.915705	-0.495384
AGK	YMR096W	0.928249	-0.454655
AGK	YMR097C	0.470396	-0.707107
AGK	YMR099C	0.282238	-0.810683
AGK	YMR100W	1.62444	1.27788
AGK	YMR101C	0.602107	-0.492987
AGK	YMR102C	0.338685	-1.06917
AGK	YMR103C	2.35198	1.5833
AGK	YMR104C	2.32062	-0.167285
AGK	YMR105C	1.76869	1.94486
AGK	YMR106C	1.94431	0.61
AGK	YMR107W	0.796538	-0.0842774
AGK	YMR109W	3.20497	1.27251
AGK	YMR110C	1.9004	0.489704
AGK	YMR111C	1.79378	0.890782
AGK	YMR114C	1.93176	0.295007
AGK	YMR115W	0.696187	0.971216
AGK	YMR118C	1.01606	-1.19072
AGK	YMR119W-A	2.16382	0.38506
AGK	YMR120C	1.3422	1.06871
AGK	YMR122C	0.395133	-0.619079
AGK	YMR124W	0.664827	-0.325856
AGK	YMR126C	0.00627195	-1.15941
AGK	YMR129W	1.63071	0.143073
AGK	YMR130W	1.83141	0.596765
AGK	YMR132C	2.78475	3.04657
AGK	YMR133W	4.72905	1.95542
AGK	YMR139W	1.53663	0.542272
AGK	YMR140W	5.95208	2.04885
AGK	YMR141C	0.602107	-0.747009
AGK	YMR144W	3.33668	1.90621
AGK	YMR145C	2.30808	0.0762365
AGK	YMR147W	2.91019	0.370302
AGK	YMR148W	2.33944	-0.144086
AGK	YMR151W	0.614651	-0.000972591
AGK	YMR152W	0.00627195	-1.24738
AGK	YMR153C-A	3.6001	1.09769
AGK	YMR153W	1.28575	-1.0257
AGK	YMR154C	1.99448	-0.971325
AGK	YMR155W	3.98896	1.2241
AGK	YMR156C	0.275966	-0.497449
AGK	YMR157C	0.871801	-0.862595
AGK	YMR158W-A	1.56172	-0.0338538
AGK	YMR159C	0.602107	-1.1542
AGK	YMR161W	3.33668	-0.103005
AGK	YMR162C	1.5868	-0.0112566
AGK	YMR163C	2.32689	0.475347
AGK	YMR164C	1.64952	0.334736
AGK	YMR166C	3.80707	1.73013
AGK	YMR167W	1.6997	0.860522
AGK	YMR169c	2.14501	1.47957
AGK	YMR170C	5.53186	0.137756
AGK	YMR171C	2.50878	0.552232
AGK	YMR172C-A	0.614651	-0.850238
AGK	YMR172W	1.98821	-0.567513
AGK	YMR173W-A	2.65931	1.81632
AGK	YMR174c	3.14852	2.81065
AGK	YMR175w	0.301054	-0.266349
AGK	YMR176W	2.81611	0.048656
AGK	YMR178W	3.86979	3.01834
AGK	YMR180C	1.55544	-0.767254
AGK	YMR181C	0.727546	-0.530669
AGK	YMR182C	0.282238	-1.50621
AGK	YMR183C	0.683643	-0.511917
AGK	YMR184W	0.269694	-1.2824
AGK	YMR186W	2.74084	2.20817
AGK	YMR187C	0.457852	-1.29159
AGK	YMR189W	1.20421	-0.533446
AGK	YMR191W	0.558204	-0.863806
AGK	YMR192W	2.09483	0.283443
AGK	YMR195W	0.0125439	-1.55389
AGK	YMR196W	0.871801	-0.651159
AGK	YMR199W	1.12895	0.21249
AGK	YMR201C	1.09759	0.127999
AGK	YMR204C	5.06774	3.60615
AGK	YMR206W	3.45585	1.50814
AGK	YMR209C	0.80281	-0.464521
AGK	YMR210W	0.401405	-1.65746
AGK	YMR214W	0.48294	0.326095
AGK	YMR215W	0.495484	-0.599448
AGK	YMR221C	3.3994	2.20724
AGK	YMR222C	4.23357	1.66051
AGK	YMR223W	0.00627195	-1.28465
AGK	YMR225C	4.72905	3.00642
AGK	YMR226C	0.100351	-0.814341
AGK	YMR230W	0.00627195	-0.931674
AGK	YMR232W	1.59935	-0.413999
AGK	YMR233W	1.61189	-0.168962
AGK	YMR237W	1.05369	2.42007
AGK	YMR241W	1.57426	0.412523
AGK	YMR242C	0.376317	-0.00675968
AGK	YMR244C-A	0.25715	-0.691559
AGK	YMR244W	0.401405	-0.503605
AGK	YMR245W	0.175615	-0.740748
AGK	YMR246W	0.470396	-1.16013
AGK	YMR247C	0.947065	-0.794219
AGK	YMR251W	1.11641	-0.235339
AGK	YMR251W-A	0.351229	-0.845442
AGK	YMR252C	0.558204	-1.03531
AGK	YMR253C	0.658555	-1.03666
AGK	YMR255W	2.89764	1.35253
AGK	YMR258C	0.934521	-0.0438001
AGK	YMR259C	2.45861	-0.118115
AGK	YMR262W	1.7436	-0.360051
AGK	YMR264W	0.370045	-1.36217
AGK	YMR265C	0.526844	-1.25787
AGK	YMR271C	4.51581	1.48612
AGK	YMR273C	4.44054	3.47856
AGK	YMR274C	1.6558	-0.58801
AGK	YMR275C	0.439037	-0.530039
AGK	YMR276W	0.990968	-1.22836
AGK	YMR278W	3.9137	1.42453
AGK	YMR279C	1.09132	-0.644042
AGK	YMR280C	1.56172	-0.384643
AGK	YMR283C	1.31084	-0.64965
AGK	YMR284W	0.00627195	-1.87043
AGK	YMR285C	1.31711	-0.803184
AGK	YMR289W	0.395133	-0.901699
AGK	YMR291W	0.219518	-1.37418
AGK	YMR292W	2.57777	-0.133862
AGK	YMR294W	0.357501	0.0315264
AGK	YMR294W-A	0.928249	-0.25942
AGK	YMR295C	0.0752634	-0.601116
AGK	YMR299C	1.10386	0.48377
AGK	YMR302C	2.214	1.15005
AGK	YMR303C	0.721274	-0.283768
AGK	YMR304C-A	3.10462	0.771526
AGK	YMR304W	0.175615	-0.524943
AGK	YMR306C-A	2.50878	1.09826
AGK	YMR306W	0.915705	-1.09639
AGK	YMR307W	0.978424	-0.323081
AGK	YMR310C	0.28851	-0.363177
AGK	YMR311C	1.7436	-0.228585
AGK	YMR313C	1.63698	0.328957
AGK	YMR315W	5.03638	1.87727
AGK	YMR316C-A	2.24536	1.74135
AGK	YMR316C-B	2.91019	1.54011
AGK	YMR316W	3.1297	1.38304
AGK	YMR317W	4.69142	1.91097
AGK	YMR318C	3.14225	0.0947767
AGK	YMR319C	1.88786	0.329156
AGK	YMR320W	2.76593	-0.223009
AGK	YNL051W	0.0125439	-1.17848
AGK	YNL052W	2.09483	0.0525058
AGK	YNL054W	0.715003	0.0730541
AGK	YNL056W	2.34571	-0.872381
AGK	YNL057W	3.82589	1.61841
AGK	YNL058C	0.382589	-0.532874
AGK	YNL063W	7.53261	1.86723
AGK	YNL065W	1.32965	-0.91379
AGK	YNL066W	2.37707	-0.491294
AGK	YNL068C	2.03211	0.695343
AGK	YNL072W	0.664827	-1.2486
AGK	YNL074C	4.02032	0.59539
AGK	YNL076W	2.64676	0.538266
AGK	YNL077W	1.56799	2.05914
AGK	YNL078W	2.45233	-0.393429
AGK	YNL082W	1.5429	-0.0604541
AGK	YNL083W	0.903161	-0.399987
AGK	YNL085W	2.29553	-0.0367538
AGK	YNL087W	3.17988	-0.0996091
AGK	YNL090W	0.947065	-0.761361
AGK	YNL091W	1.21676	1.47055
AGK	YNL092W	3.31159	0.248509
AGK	YNL093W	1.77496	1.20885
AGK	YNL094W	2.5276	0.384334
AGK	YNL095C	4.35901	1.94454
AGK	YNL098C	0.00627195	-1.4089
AGK	YNL099C	2.31435	-0.535213
AGK	YNL100W	1.27948	-0.393373
AGK	YNL101W	2.65304	0.742423
AGK	YNL104C	1.00978	-0.752377
AGK	YNL105W	3.43703	1.42122
AGK	YNL106C	1.05369	-0.408776
AGK	YNL108C	2.53387	1.404
AGK	YNL115C	2.74084	1.94557
AGK	YNL116W	0.263422	-1.2432
AGK	YNL117W	0.100351	0.117129
AGK	YNL122C	1.53663	-0.162507
AGK	YNL123W	0.583292	-0.944464
AGK	YNL125C	4.80432	2.19012
AGK	YNL127W	2.89137	2.13433
AGK	YNL128W	1.16031	-0.459113
AGK	YNL129W	1.499	-1.24282
AGK	YNL130C	0.508028	-0.937545
AGK	YNL134C	1.6997	-0.0815392
AGK	YNL140C	0.28851	-0.513924
AGK	YNL141W	1.41119	-0.607103
AGK	YNL142W	0.401405	-0.165572
AGK	YNL143C	1.86904	-0.656297
AGK	YNL144C	1.78751	0.0378279
AGK	YNL145W	9.83442	2.83385
AGK	YNL146W	3.91997	1.5061
AGK	YNL154C	0.696187	-0.0514866
AGK	YNL159C	2.43352	1.34668
AGK	YNL160W	0.219518	-0.656294
AGK	YNL163C	0.0188159	-0.53337
AGK	YNL168C	1.53663	0.775698
AGK	YNL176C	0.370045	-0.305011
AGK	YNL179C	0.476668	-0.0317218
AGK	YNL187W	0.22579	-0.293695
AGK	YNL190W	2.60913	1.81424
AGK	YNL191W	1.37356	0.971399
AGK	YNL193W	0.765178	-0.370076
AGK	YNL194C	2.42097	1.17858
AGK	YNL195C	1.73106	-0.109506
AGK	YNL198C	1.19167	0.371717
AGK	YNL200C	5.90818	3.45569
AGK	YNL202W	2.6844	1.26378
AGK	YNL211C	1.61189	3.17571
AGK	YNL212W	0.388861	-0.281996
AGK	YNL214W	0.620923	-0.567379
AGK	YNL215W	0.376317	1.11687
AGK	YNL217W	0.727546	-0.582454
AGK	YNL219C	0.0564476	-1.22171
AGK	YNL231C	3.21124	2.4835
AGK	YNL233W	0.382589	-0.604596
AGK	YNL235C	2.25163	2.55188
AGK	YNL239W	0.445309	-0.931181
AGK	YNL249C	2.59659	0.863877
AGK	YNL252C	0.282238	-0.768667
AGK	YNL253W	1.29202	0.268633
AGK	YNL255C	2.15755	-0.00822299
AGK	YNL257C	3.9137	-0.0946437
AGK	YNL259C	2.49624	1.11426
AGK	YNL264C	2.45861	3.39211
AGK	YNL265C	0.00627195	-1.23449
AGK	YNL266W	0.00627195	-2.03406
AGK	YNL269W	0.395133	-1.30724
AGK	YNL270C	0.48294	-0.761563
AGK	YNL273W	0.00627195	-0.987334
AGK	YNL274C	3.48721	-0.429564
AGK	YNL275W	2.11992	0.548112
AGK	YNL278W	0.827898	0.714917
AGK	YNL279W	4.5848	0.537327
AGK	YNL281W	1.44255	0.602554
AGK	YNL285W	1.6997	1.95562
AGK	YNL286W	0.0689915	-0.714148
AGK	YNL289W	1.11641	-0.268774
AGK	YNL291C	0.181887	-1.12272
AGK	YNL292W	0.00627195	-1.27883
AGK	YNL293W	0.301054	-1.15878
AGK	YNL294C	1.2293	-1.02844
AGK	YNL295W	0.903161	-1.03854
AGK	YNL299W	0.238334	-0.209559
AGK	YNL300W	1.41746	0.376084
AGK	YNL301C	1.2293	-0.342153
AGK	YNL303W	1.09132	-0.067672
AGK	YNL305C	0.00627195	-1.36953
AGK	YNL311C	0.633467	-0.948351
AGK	YNL314W	0.884345	-0.0303729
AGK	YNL316C	4.49072	2.19215
AGK	YNL318C	5.27471	2.95029
AGK	YNL319W	1.53663	0.469467
AGK	YNL321W	8.14727	2.8772
AGK	YNL323W	0.307326	-0.03301
AGK	YNL325C	1.499	2.15237
AGK	YNL326C	0.777722	-0.951588
AGK	YNL327W	6.26568	2.79099
AGK	YNL329C	1.86904	0.306531
AGK	YNL332W	2.2579	0.726877
AGK	YNL333W	2.98545	1.94088
AGK	YNL334C	1.23557	0.607165
AGK	YNL335W	1.74987	0.0937863
AGK	YNL336W	6.00853	2.25843
AGK	YNL338W	0.495484	-0.601433
AGK	YNL339C	2.23909	0.221863
AGK	YOL002C	0.947065	0.588827
AGK	YOL003C	0.382589	-0.596559
AGK	YOL007C	0.884345	2.16804
AGK	YOL011W	0.683643	-0.179761
AGK	YOL013C	2.2579	0.636532
AGK	YOL014W	0.909433	-0.832953
AGK	YOL015W	0.777722	0.519749
AGK	YOL016C	5.95208	3.25034
AGK	YOL019W	1.46764	1.02836
AGK	YOL020W	0.00627195	-1.05717
AGK	YOL025W	0.677371	0.00183275
AGK	YOL027C	0.00627195	-0.985689
AGK	YOL028C	2.40843	1.94323
AGK	YOL030W	0.476668	-0.998571
AGK	YOL031C	0.0188159	-1.15247
AGK	YOL032W	1.92549	1.66288
AGK	YOL035C	0.972153	0.556178
AGK	YOL037C	1.21676	1.53851
AGK	YOL043C	0.326141	-0.90367
AGK	YOL046C	3.54992	1.46031
AGK	YOL047C	1.07878	-0.0605363
AGK	YOL048C	0.213246	-0.754823
AGK	YOL053C-A	0.451581	-0.377259
AGK	YOL055C	0.539388	-0.443946
AGK	YOL056W	4.76041	4.00871
AGK	YOL057W	0.489212	-0.898537
AGK	YOL058W	2.13246	0.514671
AGK	YOL059W	1.22303	0.12733
AGK	YOL061W	0.294782	-1.0873
AGK	YOL062C	0.332413	-0.957165
AGK	YOL063C	1.12895	0.5084
AGK	YOL064C	0.0439037	-0.387025
AGK	YOL065C	2.08229	0.342366
AGK	YOL066C	0.551932	1.09569
AGK	YOL067C	2.52132	3.38092
AGK	YOL068C	0.570748	0.278901
AGK	YOL070C	1.01606	-0.0273084
AGK	YOL071W	0.00627195	-1.4473
AGK	YOL072W	0.903161	1.63908
AGK	YOL079W	1.76869	0.73052
AGK	YOL080C	0.00627195	-1.2028
AGK	YOL083W	0.551932	0.00397043
AGK	YOL084W	0.602107	-1.18496
AGK	YOL085C	5.28726	2.44102
AGK	YOR002W	0.338685	-0.927251
AGK	YOR003W	1.02233	-0.720936
AGK	YOR005C	5.36879	1.98513
AGK	YOR006C	0.294782	-0.0434309
AGK	YOR007C	3.36804	0.487898
AGK	YOR009W	2.18891	0.361181
AGK	YOR010C	3.49348	0.0378862
AGK	YOR011W	2.64049	0.0288507
AGK	YOR012W	2.84747	-0.226034
AGK	YOR013W	1.50527	0.00425491
AGK	YOR015W	3.24887	0.783605
AGK	YOR016C	1.27321	0.178495
AGK	YOR017W	0.558204	-0.549253
AGK	YOR018W	0.00627195	-0.971286
AGK	YOR021C	1.60562	0.166363
AGK	YOR022C	1.50527	-0.449059
AGK	YOR024W	6.02735	3.5728
AGK	YOR025W	0.602107	-0.716457
AGK	YOR027W	0.733818	-0.236669
AGK	YOR028C	2.2579	-0.105702
AGK	YOR029W	0.715003	-1.18316
AGK	YOR030W	2.7283	1.16822
AGK	YOR031W	2.18264	1.77978
AGK	YOR032C	1.79378	0.399379
AGK	YOR033C	0.827898	0.817972
AGK	YOR034C	0.520572	-0.414759
AGK	YOR037W	0.608379	-1.05198
AGK	YOR040W	1.32965	-0.401371
AGK	YOR041C	0.344957	-0.80099
AGK	YOR042W	1.5868	0.554878
AGK	YOR044W	0.947065	0.0276892
AGK	YOR045W	1.17285	0.0508517
AGK	YOR047C	0.696187	-0.574531
AGK	YOR049C	0.100351	-1.37449
AGK	YOR050C	0.677371	-0.814201
AGK	YOR052C	0.495484	-0.970784
AGK	YOR053W	2.65304	1.76202
AGK	YOR054C	0.602107	-0.459147
AGK	YOR055W	3.34295	1.79108
AGK	YOR058C	0.978424	-0.324699
AGK	YOR059C	2.35198	-0.832674
AGK	YOR061W	1.27321	-0.481303
AGK	YOR062C	3.11716	1.17499
AGK	YOR064C	0.827898	-0.272564
AGK	YOR066W	0.48294	-0.0495179
AGK	YOR067C	0.683643	-0.825227
AGK	YOR068C	1.26693	-1.06757
AGK	YOR069W	0.501756	-1.07927
AGK	YOR071C	3.2865	1.83371
AGK	YOR076C	0.22579	-0.290293
AGK	YOR079C	0.451581	-1.04711
AGK	YOR081C	0.827898	-0.365598
AGK	YOR082C	0.570748	-1.17921
AGK	YOR083W	3.38058	0.43815
AGK	YOR084W	3.88234	1.0875
AGK	YOR085W	0.00627195	-1.23418
AGK	YOR086C	0.752634	1.06024
AGK	YOR087W	0.476668	-0.56992
AGK	YOR088W	1.17285	0.269724
AGK	YOR089C	0.796538	0.614004
AGK	YOR090C	2.46488	-0.197141
AGK	YOR091W	1.66207	1.31023
AGK	YOR092W	1.36101	0.788235
AGK	YOR093C	3.28023	1.20362
AGK	YOR094W	0.439037	-1.06886
AGK	YOR097C	0.0313598	-1.27496
AGK	YOR099W	0.163071	-0.759751
AGK	YOR100C	1.61816	1.5286
AGK	YOR101W	0.238334	-0.79381
AGK	YOR106W	0.00627195	-0.977798
AGK	YOR107W	0.401405	-0.770687
AGK	YOR108W	0.457852	-0.112887
AGK	YOR111W	4.66006	3.29597
AGK	YOR112W	1.69343	2.05788
AGK	YOR113W	0.0125439	-1.23522
AGK	YOR114W	1.44255	0.977453
AGK	YOR118W	0.263422	-0.805579
AGK	YOR120W	0.733818	1.96458
AGK	YOR121C	0.00627195	-1.01445
AGK	YOR126C	1.26066	-0.995815
AGK	YOR129C	0.200702	-0.450067
AGK	YOR130C	0.0940793	-1.16147
AGK	YOR131C	0.0125439	-1.17657
AGK	YOR132W	0.0313598	-1.50588
AGK	YOR137C	0.269694	-0.0609436
AGK	YOR139C	0.22579	-0.343482
AGK	YOR140W	1.44255	0.32041
AGK	YOR142W	1.45509	-0.346667
AGK	YOR144C	0.627195	0.168856
AGK	YOR150W	1.22303	1.64887
AGK	YOR152C	3.76317	-1.05273
AGK	YOR153W	3.62519	1.60705
AGK	YOR154W	1.60562	1.29601
AGK	YOR155C	6.44129	1.42434
AGK	YOR156C	3.50602	0.232398
AGK	YOR158W	0.445309	0.152056
AGK	YOR161C	3.713	-0.0716617
AGK	YOR163W	0.00627195	-1.30704
AGK	YOR165W	0.884345	0.85028
AGK	YOR171C	0.783994	1.3422
AGK	YOR172W	0.22579	-1.04769
AGK	YOR177C	0.602107	-0.357736
AGK	YOR180C	1.30457	-0.179343
AGK	YOR185C	0.664827	0.0195608
AGK	YOR188W	5.15554	0.677223
AGK	YOR189W	0.188159	-0.34289
AGK	YOR190W	1.1415	0.906986
AGK	YOR192C	0.426493	0.544359
AGK	YOR193W	2.08229	1.54821
AGK	YOR197W	1.09759	0.264085
AGK	YOR202W	0.357501	-0.609253
AGK	YOR208W	0.00627195	-1.2463
AGK	YOR215C	0.5143	-0.364079
AGK	YOR219C	0.332413	-0.859188
AGK	YOR220W	0.0125439	-1.20741
AGK	YOR222W	1.66834	1.35519
AGK	YOR223W	0.790266	0.0101892
AGK	YOR225W	0.508028	-0.495291
AGK	YOR226C	0.583292	0.142528
AGK	YOR228C	0.457852	-0.539103
AGK	YOR229W	1.37356	1.21085
AGK	YOR230W	0.658555	0.109723
AGK	YOR233W	0.965881	0.30035
AGK	YOR238W	0.357501	-0.720941
AGK	YOR239W	0.00627195	-1.23308
AGK	YOR240W	0.457852	-0.0895929
AGK	YOR243C	0.0815354	-1.20139
AGK	YOR248W	0.326141	-0.691564
AGK	YOR252W	0.664827	0.888548
AGK	YOR253W	2.01957	1.28723
AGK	YOR255W	0.558204	-0.583366
AGK	YOR263C	0.54566	-0.46069
AGK	YOR264W	0.790266	-0.337385
AGK	YOR265W	1.19794	-0.263497
AGK	YOR267C	0.74009	0.334742
AGK	YOR268C	0.614651	-0.573964
AGK	YOR271C	1.88786	0.379668
AGK	YOR273C	2.23909	1.03124
AGK	YOR274W	0.420221	0.0154417
AGK	YOR275C	1.82514	0.882671
AGK	YOR276W	0.301054	-0.147754
AGK	YOR279C	0.451581	-0.21397
AGK	YOR280C	1.94431	1.10304
AGK	YOR283W	2.37707	-0.0553522
AGK	YOR284W	1.39237	0.427241
AGK	YOR285W	1.09132	-0.564169
AGK	YOR286W	1.49272	1.01555
AGK	YOR288C	3.81962	1.98224
AGK	YOR289W	1.09132	-0.833113
AGK	YOR291W	0.213246	-1.12649
AGK	YOR292C	0.137983	-0.708623
AGK	YOR296W	1.92549	0.451322
AGK	YOR297C	5.04265	0.824729
AGK	YOR298W	7.56397	2.82416
AGK	YOR300W	7.79604	1.54226
AGK	YOR304W	2.69067	0.821045
AGK	YOR306C	3.05444	-0.327909
AGK	YOR307C	0.827898	-0.284238
AGK	YOR311C	0.275966	-0.339425
AGK	YOR313C	0.250878	-1.10122
AGK	YOR314W	0.376317	-0.213587
AGK	YOR315W	0.526844	-0.433019
AGK	YOR316C	1.95058	-0.670106
AGK	YOR317W	2.06347	-0.0955003
AGK	YOR318C	0.878073	-0.729324
AGK	YOR320C	2.07602	-0.239035
AGK	YOR321W	4.14576	1.44269
AGK	YOR323C	0.00627195	-1.21252
AGK	YOR324C	1.98194	0.183982
AGK	YOR325W	9.26367	1.01656
AGK	YOR327C	4.22102	1.85678
AGK	YOR328W	4.03914	0.749001
AGK	YOR333C	4.22102	-0.254675
AGK	YOR334W	4.01405	0.866721
AGK	YOR337W	0.921977	-1.13982
AGK	YOR338W	2.24536	1.65032
AGK	YOR339C	5.72629	3.68747
AGK	YOR342C	3.52484	1.52014
AGK	YOR343C	5.60085	2.17427
AGK	YOR344C	0.382589	-0.600881
AGK	YOR345C	8.14727	1.48938
AGK	YOR346W	0.5143	-1.32258
AGK	YOR347C	2.03211	0.101697
AGK	YOR348C	0.909433	-0.716996
AGK	YOR350C	0.721274	1.6259
AGK	YOR351C	1.6558	0.789532
AGK	YOR354C	3.33668	2.22522
AGK	YOR356W	0.959609	0.70403
AGK	YOR357C	3.713	1.54712
AGK	YOR358W	0.758906	0.799237
AGK	YOR359W	1.499	0.0494524
AGK	YOR363C	1.1854	0.902012
AGK	YOR364W	0.658555	1.64524
AGK	YOR365C	1.21676	0.0260437
AGK	YOR366W	3.1297	1.36653
AGK	YOR367W	0.564476	-0.111396
AGK	YOR368W	0.413949	-0.574651
AGK	YOR375C	2.69067	2.30318
AGK	YOR376W	0.677371	0.609783
AGK	YOR377W	0.608379	-0.209063
AGK	YOR379C	1.86277	0.000847551
AGK	YOR381W	0.658555	-0.773012
AGK	YOR382W	0.57702	-1.13051
AGK	YOR384W	0.903161	-0.904041
AGK	YOR385W	2.23909	0.30727
AGK	YOR386W	0.294782	-0.335883
AGK	YPL002C	0.344957	-0.366363
AGK	YPL003W	0.344957	-0.79361
AGK	YPL004C	0.206974	-0.948379
AGK	YPL006W	1.6558	0.424466
AGK	YPL009C	0.978424	-0.460414
AGK	YPL010W	0.0940793	-0.707107
AGK	YPL013C	0.77145	-0.164954
AGK	YPL015C	1.56172	0.326068
AGK	YPL019C	0.526844	0.279274
AGK	YPL021W	0.551932	-0.941078
AGK	YPL022W	0.5143	-0.614036
AGK	YPL023C	1.26693	-0.0596925
AGK	YPL026C	1.05369	0.415676
AGK	YPL027W	0.558204	-0.24934
AGK	YPL030W	0.758906	0.464859
AGK	YPL032C	2.13246	0.488938
AGK	YPL033C	1.35474	0.395941
AGK	YPL034W	2.19518	-0.526614
AGK	YPL035C	0.445309	0.643993
AGK	YPL036W	3.54992	0.0532703
AGK	YPL038W	0.508028	-0.291844
AGK	YPL046C	0.0564476	-0.735484
AGK	YPL048W	0.250878	-0.945962
AGK	YPL049C	0.501756	1.94
AGK	YPL051W	0.00627195	-2.14562
AGK	YPL052W	0.363773	-0.574036
AGK	YPL053C	1.04114	2.09865
AGK	YPL054W	0.526844	0.130854
AGK	YPL056C	1.33593	1.12605
AGK	YPL058C	0.407677	-0.278391
AGK	YPL060W	0.301054	-0.82399
AGK	YPL062W	0.188159	-0.337341
AGK	YPL064C	0.0689915	-1.02864
AGK	YPL066W	0.846713	0.37226
AGK	YPL067C	2.84119	2.03495
AGK	YPL070W	0.608379	-0.824065
AGK	YPL072W	0.539388	0.343606
AGK	YPL073C	0.627195	-0.155397
AGK	YPL074W	0.370045	-0.598431
AGK	YPL087W	1.72479	1.11114
AGK	YPL089C	0.407677	-0.389085
AGK	YPL092W	0.451581	-0.723444
AGK	YPL096W	0.570748	0.161192
AGK	YPL098C	0.175615	-0.313084
AGK	YPL099C	2.214	0.913091
AGK	YPL100W	1.99448	0.564422
AGK	YPL103C	1.17285	1.26346
AGK	YPL105C	1.5868	1.05852
AGK	YPL107W	4.32765	2.31119
AGK	YPL109C	0.00627195	-1.43683
AGK	YPL110C	1.37983	0.227066
AGK	YPL111W	0.677371	-0.668325
AGK	YPL112C	1.90667	1.97219
AGK	YPL113C	0.219518	-0.696891
AGK	YPL114W	1.36729	-0.134059
AGK	YPL116W	3.22378	2.36712
AGK	YPL119C	1.17913	-0.210051
AGK	YPL120W	1.83141	0.213426
AGK	YPL121C	1.24185	-0.147269
AGK	YPL123C	0.445309	-0.360599
AGK	YPL132W	0.821626	-0.0277292
AGK	YPL133C	1.84395	-0.496064
AGK	YPL134C	1.69343	0.0450934
AGK	YPL137C	0.00627195	-0.707107
AGK	YPL138C	1.72479	0.362596
AGK	YPL139C	0.00627195	-1.19023
AGK	YPL140C	0.156799	-0.490854
AGK	YPL141C	0.859257	-1.01224
AGK	YPL144W	0.407677	0.185451
AGK	YPL145C	1.00978	-1.00518
AGK	YPL147W	2.33317	0.393285
AGK	YPL149W	1.05369	-0.573585
AGK	YPL150W	0.796538	-0.0963067
AGK	YPL154C	0.301054	-1.59563
AGK	YPL155C	0.708731	-0.644768
AGK	YPL156C	2.11365	1.65728
AGK	YPL159C	0.301054	-1.15996
AGK	YPL162C	1.499	1.10782
AGK	YPL163C	1.16031	0.0573387
AGK	YPL164C	1.81259	1.4402
AGK	YPL165C	1.8565	-0.451795
AGK	YPL166W	2.14501	0.185642
AGK	YPL167C	1.90667	0.358617
AGK	YPL168W	0.696187	-0.8817
AGK	YPL170W	2.19518	1.24627
AGK	YPL171C	0.846713	-0.63373
AGK	YPL172C	0.00627195	-1.01021
[truncated: 52 more rows]

## Sheet: ASCIZ
Table S2. Barcode counts of yeast deletion strains obtained from high-throughput sequencing.
Query (Kinase)	Subject (yeast gene deletion)	Normalized barcode counts	Z-score
ASCIZ	YAL001C	0.0398625	-0.654149
ASCIZ	YAL002W	0.264089	-0.648121
ASCIZ	YAL004W	0.383676	-1.15034
ASCIZ	YAL005C	1.9433	-0.0363719
ASCIZ	YAL007C	0.323883	-0.817353
ASCIZ	YAL008W	0.279037	-0.23393
ASCIZ	YAL011W	0.264089	-0.215006
ASCIZ	YAL012W	3.8268	0.408374
ASCIZ	YAL014C	0.757387	-0.237713
ASCIZ	YAL015C	2.11271	0.613291
ASCIZ	YAL017W	0.553092	-0.378798
ASCIZ	YAL018C	0.737456	-0.338532
ASCIZ	YAL019W	0.104639	-0.825458
ASCIZ	YAL021C	0.279037	0.109903
ASCIZ	YAL022C	1.25069	0.498451
ASCIZ	YAL027W	0.901888	0.076528
ASCIZ	YAL028W	1.16099	-0.193169
ASCIZ	YAL029C	0.926803	0.0687222
ASCIZ	YAL030W	0.891923	-0.187139
ASCIZ	YAL031C	1.22079	1.07134
ASCIZ	YAL034C	0.742439	-0.179628
ASCIZ	YAL036C	1.04141	-0.201671
ASCIZ	YAL037W	1.83367	1.63628
ASCIZ	YAL039C	0.244158	-0.935516
ASCIZ	YAL042W	1.08625	0.474976
ASCIZ	YAL043C-	0.129553	-0.790009
ASCIZ	YAL045C	0.433504	-0.524388
ASCIZ	YAL046C	0.742439	1.01367
ASCIZ	YAL049C	0.558075	0.32724
ASCIZ	YAL051W	1.40515	0.835738
ASCIZ	YAL053W	0.597937	-0.94284
ASCIZ	YAL055W	0.871992	-0.230363
ASCIZ	YAL056W	0.682645	-0.0886164
ASCIZ	YAL059W	0.0996562	-0.615081
ASCIZ	YAL060W	1.02646	-0.111797
ASCIZ	YAL061W	0.453436	-0.730915
ASCIZ	YAL062W	1.16099	-0.295024
ASCIZ	YAL065C	0.298969	-0.905441
ASCIZ	YAL066W	0.732473	0.226129
ASCIZ	YAL067C	0.269072	-0.819008
ASCIZ	YAL068C	1.77388	-0.0894534
ASCIZ	YAR003W	0.523195	0.505435
ASCIZ	YAR020C	0.40859	-0.869131
ASCIZ	YAR023C	0.24914	-0.631463
ASCIZ	YAR027W	0.274055	-0.74201
ASCIZ	YAR028W	0.60292	-0.628529
ASCIZ	YAR029W	1.02148	-0.354061
ASCIZ	YAR030C	0.338831	-0.729616
ASCIZ	YAR031W	0.468384	-0.596292
ASCIZ	YAR035W	0.56804	-0.39557
ASCIZ	YAR037W	0.76237	-0.381373
ASCIZ	YAR040C	0.473367	-0.669475
ASCIZ	YAR042W	1.4201	0.780876
ASCIZ	YAR043C	0.44347	0.105786
ASCIZ	YAR044W	0.358762	-0.377471
ASCIZ	YAR047C	0.508247	-0.878232
ASCIZ	YBL001C	0.0996562	-0.738385
ASCIZ	YBL002W	0.358762	-0.18363
ASCIZ	YBL003C	0.368728	-0.260673
ASCIZ	YBL005W	1.60945	0.588762
ASCIZ	YBL009W	1.01151	0.808309
ASCIZ	YBL010C	0.199312	-0.745691
ASCIZ	YBL011W	1.1012	0.0439655
ASCIZ	YBL012C	0.976631	0.0817457
ASCIZ	YBL013W	1.19587	1.05632
ASCIZ	YBL015W	0.92182	-0.255038
ASCIZ	YBL017C	0.289003	-0.0446612
ASCIZ	YBL019W	0.597937	-0.237816
ASCIZ	YBL028C	0.672679	0.760577
ASCIZ	YBL029W	0.154467	-0.500065
ASCIZ	YBL032W	0.119587	-0.463152
ASCIZ	YBL036C	1.82869	1.11052
ASCIZ	YBL037W	0.458418	-0.22107
ASCIZ	YBL043W	0.523195	0.270823
ASCIZ	YBL045C	1.34038	0.344205
ASCIZ	YBL049W	1.85361	0.351989
ASCIZ	YBL053W	0.6378	-0.65848
ASCIZ	YBL054W	0.164433	-0.827915
ASCIZ	YBL055C	1.08127	0.821497
ASCIZ	YBL056W	0.204295	-0.946764
ASCIZ	YBL057C	0.597937	-0.447574
ASCIZ	YBL059W	1.73402	0.127968
ASCIZ	YBL061C	0.333848	-0.998943
ASCIZ	YBL062W	1.53969	1.19824
ASCIZ	YBL063W	0.936768	-0.169413
ASCIZ	YBL064C	1.99312	1.1921
ASCIZ	YBL065W	0.0896906	-0.350382
ASCIZ	YBL066C	1.78883	0.333485
ASCIZ	YBL067C	1.45996	0.385952
ASCIZ	YBL069W	0.931785	-0.338006
ASCIZ	YBL070C	2.03299	0.509366
ASCIZ	YBL075C	0.777318	-0.393587
ASCIZ	YBL078C	1.20086	-0.319306
ASCIZ	YBL080C	0.896906	0.191213
ASCIZ	YBL081W	0.0647765	-1.00846
ASCIZ	YBL082C	0.333848	-0.366227
ASCIZ	YBL083C	0.0847078	-0.619048
ASCIZ	YBL085W	1.61941	0.741896
ASCIZ	YBL086C	1.67422	0.304154
ASCIZ	YBL088C	0.15945	-0.821559
ASCIZ	YBL089W	0.906871	0.0258435
ASCIZ	YBL090W	0.214261	-0.356117
ASCIZ	YBL091C	0.388659	-0.87557
ASCIZ	YBL094C	0.154467	-0.854972
ASCIZ	YBL095W	1.36031	-0.629001
ASCIZ	YBL096C	1.17096	-0.307887
ASCIZ	YBL098W	1.7689	0.216497
ASCIZ	YBL101C	7.54397	-0.358358
ASCIZ	YBL102W	2.46649	1.00438
ASCIZ	YBL104C	1.06134	0.314144
ASCIZ	YBL106C	0.154467	-0.935003
ASCIZ	YBL107C	2.90498	0.730872
ASCIZ	YBR001C	1.68917	-0.441504
ASCIZ	YBR005W	2.01305	1.20543
ASCIZ	YBR006W	0.289003	-0.532931
ASCIZ	YBR007C	1.23075	-0.61793
ASCIZ	YBR008C	1.37027	-0.300071
ASCIZ	YBR009C	0.807215	1.8395
ASCIZ	YBR010W	0.92182	-0.0214488
ASCIZ	YBR012C	0.189347	-1.28266
ASCIZ	YBR013C	1.97818	0.653982
ASCIZ	YBR014C	0.149484	-0.918223
ASCIZ	YBR015C	0.428522	0.0801252
ASCIZ	YBR016W	3.63745	1.50754
ASCIZ	YBR018C	2.54123	0.373116
ASCIZ	YBR019C	0.876974	1.17746
ASCIZ	YBR020W	1.83866	0.564594
ASCIZ	YBR022W	1.20086	-0.391042
ASCIZ	YBR023C	0.573023	0.106532
ASCIZ	YBR024W	1.95326	1.28901
ASCIZ	YBR025C	0.822164	1.11671
ASCIZ	YBR027C	0.298969	-0.544569
ASCIZ	YBR028C	0.627834	-0.282445
ASCIZ	YBR030W	0.274055	-0.750801
ASCIZ	YBR032W	0.47835	-0.171985
ASCIZ	YBR033W	1.21581	0.112752
ASCIZ	YBR034C	2.2622	0.511115
ASCIZ	YBR037C	0.393642	-0.347309
ASCIZ	YBR040W	0.179381	-0.787593
ASCIZ	YBR041W	0.219244	-0.442819
ASCIZ	YBR042C	0.69261	-0.102455
ASCIZ	YBR043C	1.43505	-0.230713
ASCIZ	YBR045C	2.05292	0.163767
ASCIZ	YBR046C	2.48642	0.0370646
ASCIZ	YBR047W	0.76237	-0.65702
ASCIZ	YBR050C	4.31013	0.179582
ASCIZ	YBR051W	1.8835	-0.127803
ASCIZ	YBR052C	1.89845	0.441177
ASCIZ	YBR053C	0.0996562	-1.74867
ASCIZ	YBR054W	1.3902	0.284524
ASCIZ	YBR056W	0.508247	-0.24569
ASCIZ	YBR057C	0.279037	-0.656916
ASCIZ	YBR058C	0.328865	-1.5054
ASCIZ	YBR059C	3.29862	0.555359
ASCIZ	YBR062C	0.353779	-0.692752
ASCIZ	YBR063C	0.632817	-0.803143
ASCIZ	YBR064W	3.46305	1.09871
ASCIZ	YBR065C	1.89347	0.370994
ASCIZ	YBR066C	1.52972	-0.2979
ASCIZ	YBR067C	1.34038	0.191778
ASCIZ	YBR068C	1.47989	-0.0908182
ASCIZ	YBR069C	0.528178	-0.403217
ASCIZ	YBR071W	1.50481	-0.11043
ASCIZ	YBR072W	2.8402	1.28793
ASCIZ	YBR073W	0.348797	-0.73939
ASCIZ	YBR074W	1.38522	-0.896719
ASCIZ	YBR075W	0.612886	-0.670479
ASCIZ	YBR083W	2.24226	1.69078
ASCIZ	YBR084W	3.98625	2.19919
ASCIZ	YBR090C-A	0.563057	-0.454359
ASCIZ	YBR092C	2.07783	1.9517
ASCIZ	YBR093C	0.742439	-0.373493
ASCIZ	YBR094W	0.378694	-0.496598
ASCIZ	YBR098W	0.204295	-0.396628
ASCIZ	YBR100W	1.2457	1.3622
ASCIZ	YBR101C	1.36031	0.993038
ASCIZ	YBR104W	1.46993	0.333112
ASCIZ	YBR105C	1.1311	0.309103
ASCIZ	YBR108W	0.00996562	-0.36635
ASCIZ	YBR113W	0.19433	-0.235252
ASCIZ	YBR114W	0.0946734	-0.549169
ASCIZ	YBR116C	0.69261	0.19971
ASCIZ	YBR120C	2.00309	0.5849
ASCIZ	YBR128C	0.642782	-0.56903
ASCIZ	YBR129C	0.259106	-0.751135
ASCIZ	YBR130C	1.50979	1.01263
ASCIZ	YBR131W	0.498281	0.202237
ASCIZ	YBR134W	0.358762	0.735024
ASCIZ	YBR137W	1.00653	-0.317181
ASCIZ	YBR138C	1.14106	0.457019
ASCIZ	YBR139W	0.817181	-0.736799
ASCIZ	YBR141C	0.209278	-1.16534
ASCIZ	YBR144C	1.32044	0.944963
ASCIZ	YBR145W	1.68917	0.872889
ASCIZ	YBR147W	1.71409	-0.343401
ASCIZ	YBR148W	1.56958	-0.303433
ASCIZ	YBR150C	1.51976	2.21751
ASCIZ	YBR151W	0.832129	-0.222597
ASCIZ	YBR157C	0.632817	-0.28818
ASCIZ	YBR158W	1.01649	1.59302
ASCIZ	YBR161W	0.428522	-0.532174
ASCIZ	YBR162W-A	1.5646	0.906089
ASCIZ	YBR164C	0.607903	-0.361964
ASCIZ	YBR169C	1.20584	-0.516332
ASCIZ	YBR170C	0.996562	0.58033
ASCIZ	YBR172C	1.3902	0.242328
ASCIZ	YBR175W	0.254123	0.0368621
ASCIZ	YBR176W	0.597937	-0.254908
ASCIZ	YBR177C	1.10618	0.479542
ASCIZ	YBR178W	1.1012	0.985592
ASCIZ	YBR180W	0.274055	-0.503485
ASCIZ	YBR182C	0.144501	-0.785283
ASCIZ	YBR183W	0.607903	-0.667161
ASCIZ	YBR184W	0.822164	0.32957
ASCIZ	YBR185C	0.807215	-1.02917
ASCIZ	YBR186W	0.951717	0.195819
ASCIZ	YBR187W	0.0448453	-0.486245
ASCIZ	YBR188C	0.543126	0.011656
ASCIZ	YBR197C	0.483333	-0.442051
ASCIZ	YBR199W	1.81873	1.05777
ASCIZ	YBR203W	2.57611	2.27219
ASCIZ	YBR204C	4.67388	3.04261
ASCIZ	YBR205W	1.37027	-0.662871
ASCIZ	YBR206W	5.35154	3.40139
ASCIZ	YBR207W	1.27062	0.111108
ASCIZ	YBR208C	0.657731	-0.43346
ASCIZ	YBR210W	0.28402	-0.248226
ASCIZ	YBR212W	1.20584	0.180927
ASCIZ	YBR213W	0.0298969	-0.355112
ASCIZ	YBR214W	1.16598	0.984687
ASCIZ	YBR216C	1.82371	0.406171
ASCIZ	YBR217W	1.66924	0.484863
ASCIZ	YBR218C	1.17594	-0.394846
ASCIZ	YBR219C	0.343814	-0.862149
ASCIZ	YBR220C	1.31546	-0.497748
ASCIZ	YBR221C	0.00498281	-1.15342
ASCIZ	YBR222C	1.3902	0.692013
ASCIZ	YBR223C	0.632817	-0.356463
ASCIZ	YBR224W	2.13264	1.00934
ASCIZ	YBR225W	0.473367	-0.766731
ASCIZ	YBR226C	1.34536	-0.494529
ASCIZ	YBR227C	1.15103	-0.625681
ASCIZ	YBR228W	1.90842	0.0792974
ASCIZ	YBR229C	1.61941	-0.697137
ASCIZ	YBR230C	2.43161	-0.313856
ASCIZ	YBR232C	1.92336	0.10924
ASCIZ	YBR233W	1.73402	1.35179
ASCIZ	YBR235W	1.42508	0.851624
ASCIZ	YBR239C	1.81873	0.462781
ASCIZ	YBR240C	2.6658	0.974975
ASCIZ	YBR241C	1.41014	-0.392183
ASCIZ	YBR242W	1.18093	-0.138089
ASCIZ	YBR244W	7.86786	1.26006
ASCIZ	YBR245C	1.21581	-0.235735
ASCIZ	YBR246W	0.289003	-1.28018
ASCIZ	YBR248C	0.578006	-0.773509
ASCIZ	YBR250W	0.931785	-0.918568
ASCIZ	YBR255W	0.468384	-0.798597
ASCIZ	YBR258C	0.777318	-0.507153
ASCIZ	YBR259W	1.44501	-0.531682
ASCIZ	YBR260C	0.832129	-0.66742
ASCIZ	YBR261C	2.07783	0.727869
ASCIZ	YBR262C	1.61941	-0.127373
ASCIZ	YBR263W	0.587971	-1.06047
ASCIZ	YBR264C	0.662714	-0.699607
ASCIZ	YCL005W	0.174398	-0.39374
ASCIZ	YCL006C	4.32508	0.594543
ASCIZ	YCL009C	0.209278	-0.614085
ASCIZ	YCL011C	0.393642	-0.272823
ASCIZ	YCL012W	0.438487	-0.915037
ASCIZ	YCL013W	0.553092	-0.621513
ASCIZ	YCL014W	0.15945	-0.843843
ASCIZ	YCL022C	1.20086	-0.225219
ASCIZ	YCL023C	6.16872	0.409101
ASCIZ	YCL024W	0.672679	0.358885
ASCIZ	YCL025C	0.024914	-0.646756
ASCIZ	YCL027W	0.931785	0.600939
ASCIZ	YCL028W	0.199312	-0.618596
ASCIZ	YCL030C	0.0398625	-0.516153
ASCIZ	YCL033C	0.0747421	-0.74962
ASCIZ	YCL037C	0.488315	0.774226
ASCIZ	YCL038C	0.687628	-1.0794
ASCIZ	YCL039W	0.358762	-0.474195
ASCIZ	YCL045C	0.338831	-0.863833
ASCIZ	YCL047C	0.991579	1.12727
ASCIZ	YCL048W	0.807215	0.621158
ASCIZ	YCL049C	0.747421	-0.506093
ASCIZ	YCL051W	1.23574	1.30298
ASCIZ	YCL055W	0.15945	0.481583
ASCIZ	YCL056C	0.44347	-0.388063
ASCIZ	YCL057W	0.328865	-0.537027
ASCIZ	YCL062W	0.154467	-0.950601
ASCIZ	YCL064C	1.37526	1.61929
ASCIZ	YCL069W	0.40859	-0.595768
ASCIZ	YCL073C	1.22577	-0.369286
ASCIZ	YCL074W	2.96975	0.221854
ASCIZ	YCL075W	6.89621	0.799957
ASCIZ	YCL076W	2.89501	-0.231177
ASCIZ	YCR001W	0.279037	-0.177981
ASCIZ	YCR004C	0.498281	0.00587616
ASCIZ	YCR005C	0.587971	-0.42909
ASCIZ	YCR006C	0.363745	-0.368006
ASCIZ	YCR007C	0.348797	0.711514
ASCIZ	YCR008W	1.00653	0.297151
ASCIZ	YCR010C	0.966665	0.308189
ASCIZ	YCR011C	0.72749	0.165775
ASCIZ	YCR015C	0.647765	-0.32351
ASCIZ	YCR018C	2.01804	-0.0643281
ASCIZ	YCR019W	0.857043	-0.427832
ASCIZ	YCR020C	0.313917	-0.149044
ASCIZ	YCR021C	1.18591	-0.135283
ASCIZ	YCR022C	0.0149484	-1.16123
ASCIZ	YDL009C	0.189347	-1.05218
ASCIZ	YDL010W	0.617868	0.445454
ASCIZ	YDL011C	0.538143	-0.0133331
ASCIZ	YDL012C	2.61099	1.82493
ASCIZ	YDL018C	1.07629	0.491309
ASCIZ	YDL019C	0.582989	0.12616
ASCIZ	YDL023C	0.169416	-0.50053
ASCIZ	YDL024C	0.154467	-0.770852
ASCIZ	YDL026W	1.04639	0.445958
ASCIZ	YDL027C	1.48986	2.13859
ASCIZ	YDL032W	0.154467	0.239428
ASCIZ	YDL033C	0.179381	-0.127378
ASCIZ	YDL034W	0.867009	-0.306131
ASCIZ	YDL035C	0.274055	-0.641961
ASCIZ	YDL036C	0.383676	-0.870804
ASCIZ	YDL038C	0.647765	0.144379
ASCIZ	YDL039C	2.60601	0.963368
ASCIZ	YDL046W	0.752404	0.411714
ASCIZ	YDL048C	0.279037	-0.210528
ASCIZ	YDL049C	1.00154	0.209736
ASCIZ	YDL050C	0.104639	-0.400796
ASCIZ	YDL051W	1.64433	2.43049
ASCIZ	YDL052C	1.09124	0.373001
ASCIZ	YDL053C	0.413573	-0.517202
ASCIZ	YDL054C	0.0448453	-0.65348
ASCIZ	YDL056W	0.274055	-0.0555976
ASCIZ	YDL061C	0.229209	0.00611463
ASCIZ	YDL065C	0.144501	-0.582473
ASCIZ	YDL067C	0.597937	0.435029
ASCIZ	YDL069C	0.323883	-0.428754
ASCIZ	YDL070W	0.298969	-0.539519
ASCIZ	YDL071C	0.214261	-0.59373
ASCIZ	YDL072C	0.558075	0.0375248
ASCIZ	YDL073W	0.134536	-0.0905777
ASCIZ	YDL076C	0.169416	-0.702788
ASCIZ	YDL077C	0.139519	-0.542781
ASCIZ	YDL078C	0.00498281	-1.23793
ASCIZ	YDL079C	0.797249	-0.312907
ASCIZ	YDL080C	0.373711	-0.473997
ASCIZ	YDL085W	0.139519	-0.715914
ASCIZ	YDL086W	0.0946734	-1.05367
ASCIZ	YDL088C	0.134536	-0.616436
ASCIZ	YDL089W	0.169416	-0.596972
ASCIZ	YDL091C	1.15103	0.704633
ASCIZ	YDL093W	0.12457	-1.0225
ASCIZ	YDL094C	0.782301	0.294715
ASCIZ	YDL095W	0.458418	0.219018
ASCIZ	YDL096C	0.3189	-0.917209
ASCIZ	YDL099W	0.119587	-0.934612
ASCIZ	YDL100C	0.234192	-0.310088
ASCIZ	YDL104C	1.52972	-0.0551308
ASCIZ	YDL107W	0.363745	0.856454
ASCIZ	YDL109C	1.72405	-0.515886
ASCIZ	YDL110C	0.961682	-0.385406
ASCIZ	YDL112W	2.29708	0.167173
ASCIZ	YDL113C	3.86666	1.10712
ASCIZ	YDL114W	1.37027	-0.683609
ASCIZ	YDL118W	0.558075	-0.477181
ASCIZ	YDL121C	1.49983	-0.326739
ASCIZ	YDL122W	1.93333	1.38844
ASCIZ	YDL123W	0.742439	-0.709956
ASCIZ	YDL124W	1.9134	1.48205
ASCIZ	YDL125C	1.8835	2.9301
ASCIZ	YDL127W	0.777318	0.040423
ASCIZ	YDL129W	2.12268	0.194711
ASCIZ	YDL130W	0.0896906	-0.527319
ASCIZ	YDL131W	0.24914	-0.841512
ASCIZ	YDL133W	0.787284	-0.0938767
ASCIZ	YDL134C	1.33041	0.174875
ASCIZ	YDL134C-A	2.19742	0.581421
ASCIZ	YDL135C	2.41168	0.985268
ASCIZ	YDL136W	0.956699	0.670623
ASCIZ	YDL137W	4.20549	0.1749
ASCIZ	YDL138W	3.9713	-0.341477
ASCIZ	YDL142C	2.80532	-0.623521
ASCIZ	YDL146W	0.951717	-0.283008
ASCIZ	YDL149W	1.18093	-0.997877
ASCIZ	YDL154W	9.09861	0.469806
ASCIZ	YDL155W	5.46614	0.272561
ASCIZ	YDL156W	8.32129	0.663361
ASCIZ	YDL157C	3.56769	0.155123
ASCIZ	YDL161W	4.92302	0.257208
ASCIZ	YDL162C	0.612886	0.381758
ASCIZ	YDL167C	5.58573	0.417739
ASCIZ	YDL168W	4.18058	0.351444
ASCIZ	YDL169C	5.26185	0.788071
ASCIZ	YDL170W	6.79157	1.19998
ASCIZ	YDL171C	6.07404	1.01706
ASCIZ	YDL172C	1.02148	0.287598
ASCIZ	YDL173W	1.33041	0.960983
ASCIZ	YDL174C	4.03109	-0.753646
ASCIZ	YDL176W	12.2228	0.614292
ASCIZ	YDL177C	9.59191	1.12167
ASCIZ	YDL178W	2.79037	-0.644421
ASCIZ	YDL179W	4.02113	0.994903
ASCIZ	YDL180W	8.78469	0.152139
ASCIZ	YDL182W	7.60875	0.736462
ASCIZ	YDL183C	1.44003	0.0336622
ASCIZ	YDL184C	5.9993	0.672403
ASCIZ	YDL186W	2.11271	-1.05703
ASCIZ	YDL187C	6.74174	1.22316
ASCIZ	YDL188C	3.49295	0.630876
ASCIZ	YDL189W	5.0725	0.530813
ASCIZ	YDL190C	3.45807	0.693646
ASCIZ	YDL194W	0.204295	-0.0195232
ASCIZ	YDL197C	1.49484	0.306074
ASCIZ	YDL199C	3.73212	1.12546
ASCIZ	YDL200C	2.77542	0.0106982
ASCIZ	YDL201W	2.8103	0.523558
ASCIZ	YDL203C	4.58917	1.06046
ASCIZ	YDL204W	5.65051	1.52982
ASCIZ	YDL206W	5.84982	2.08506
ASCIZ	YDL210W	3.55773	0.994842
ASCIZ	YDL211C	1.35034	0.220723
ASCIZ	YDL215C	4.58418	0.9586
ASCIZ	YDL216C	0.0797249	-0.635168
ASCIZ	YDL218W	1.31048	-0.995388
ASCIZ	YDL219W	2.70068	0.445126
ASCIZ	YDL222C	3.07938	-1.08746
ASCIZ	YDL223C	1.85859	0.167379
ASCIZ	YDL224C	4.79346	1.642
ASCIZ	YDL225W	0.279037	-1.30322
ASCIZ	YDL227C	4.33504	-0.0648514
ASCIZ	YDL229W	2.03299	1.94842
ASCIZ	YDL230W	2.86013	0.0343221
ASCIZ	YDL231C	3.75704	0.442161
ASCIZ	YDL233W	2.68075	-0.487641
ASCIZ	YDL234C	1.0713	-0.425656
ASCIZ	YDL236W	2.77542	-0.220244
ASCIZ	YDL237W	1.55464	0.10483
ASCIZ	YDL238C	1.96821	0.830417
ASCIZ	YDL239C	1.48986	-0.332435
ASCIZ	YDL240W	1.73402	0.0176442
ASCIZ	YDL241W	1.14605	-0.357908
ASCIZ	YDL242W	4.09089	0.23989
ASCIZ	YDL243C	3.38831	0.697831
ASCIZ	YDR001C	4.12577	1.34223
ASCIZ	YDR003W	1.71907	0.189767
ASCIZ	YDR004W	0.0946734	-0.442704
ASCIZ	YDR005C	0.722507	-0.113921
ASCIZ	YDR006C	4.82834	0.253217
ASCIZ	YDR009W	3.07439	-0.0791308
ASCIZ	YDR010C	5.53092	1.91034
ASCIZ	YDR011W	2.18745	-0.0517133
ASCIZ	YDR015C	0.423539	-0.971572
ASCIZ	YDR018C	0.493298	-1.65123
ASCIZ	YDR019C	5.3914	1.08469
ASCIZ	YDR020C	0.154467	-0.693218
ASCIZ	YDR022C	4.41477	0.786
ASCIZ	YDR026C	2.07783	-0.628043
ASCIZ	YDR028C	1.03642	-0.470914
ASCIZ	YDR029W	4.20051	0.498739
ASCIZ	YDR030C	1.86357	-0.783814
ASCIZ	YDR031W	2.6658	-0.104881
ASCIZ	YDR032C	1.84364	0.338097
ASCIZ	YDR033W	2.27714	-0.290075
ASCIZ	YDR034C	1.86357	0.0975591
ASCIZ	YDR035W	2.17749	-0.683399
ASCIZ	YDR036C	3.26872	1.22511
ASCIZ	YDR042C	5.12233	2.07899
ASCIZ	YDR043C	1.55464	-0.115012
ASCIZ	YDR046C	4.28522	1.01974
ASCIZ	YDR051C	0.961682	0.286371
ASCIZ	YDR055W	1.64433	1.31501
ASCIZ	YDR056C	2.29708	0.59418
ASCIZ	YDR059C	0.976631	-0.640792
ASCIZ	YDR061W	1.00154	-0.514211
ASCIZ	YDR063W	1.02646	-0.288976
ASCIZ	YDR066C	1.61443	-0.19493
ASCIZ	YDR067C	1.06134	-1.0216
ASCIZ	YDR068W	2.19244	0.271977
ASCIZ	YDR070C	0.85206	-0.246994
ASCIZ	YDR072C	0.0149484	-1.02921
ASCIZ	YDR073W	1.69914	0.018173
ASCIZ	YDR075W	0.308934	-0.6696
ASCIZ	YDR077W	1.52972	0.594223
ASCIZ	YDR078C	0.92182	0.353308
ASCIZ	YDR084C	1.00653	0.287692
ASCIZ	YDR085C	0.533161	-0.859924
ASCIZ	YDR089W	4.4347	1.00752
ASCIZ	YDR090C	1.82371	0.138349
ASCIZ	YDR093W	1.38024	0.343137
ASCIZ	YDR094W	1.48488	0.0844957
ASCIZ	YDR095C	4.23539	2.31051
ASCIZ	YDR096W	1.55962	0.363049
ASCIZ	YDR097C	2.39175	0.650286
ASCIZ	YDR098C	1.09622	0.0773002
ASCIZ	YDR099W	1.44003	0.242121
ASCIZ	YDR100W	1.57457	0.51461
ASCIZ	YDR102C	0.119587	-1.10356
ASCIZ	YDR104C	0.911854	-0.389265
ASCIZ	YDR105C	0.164433	0.449268
ASCIZ	YDR107C	0.189347	-1.4656
ASCIZ	YDR108W	0.483333	-0.776114
ASCIZ	YDR109C	1.03144	-0.10542
ASCIZ	YDR110W	0.179381	-1.1363
ASCIZ	YDR111C	0.353779	-0.781367
ASCIZ	YDR112W	3.189	0.585348
ASCIZ	YDR116C	0.817181	0.419506
ASCIZ	YDR117C	0.822164	-0.090267
ASCIZ	YDR119W	2.88006	0.627216
ASCIZ	YDR121W	1.15103	1.3222
ASCIZ	YDR122W	2.32697	0.0256628
ASCIZ	YDR123C	3.82181	0.551054
ASCIZ	YDR124W	2.71065	0.585949
ASCIZ	YDR128W	1.48986	0.260988
ASCIZ	YDR130C	2.63591	2.08912
ASCIZ	YDR131C	1.42508	0.36876
ASCIZ	YDR132C	0.961682	0.201163
ASCIZ	YDR133C	3.11924	0.728382
ASCIZ	YDR134C	2.69072	0.213156
ASCIZ	YDR135C	1.65429	0.562382
ASCIZ	YDR136C	0.358762	-0.212581
ASCIZ	YDR139C	1.64433	0.568238
ASCIZ	YDR142C	0.463401	-0.251935
ASCIZ	YDR143C	1.52972	-0.285329
ASCIZ	YDR144C	2.2622	1.23505
ASCIZ	YDR146C	1.55464	-0.031682
ASCIZ	YDR147W	0.0697593	-0.464403
ASCIZ	YDR148C	0.533161	-0.396289
ASCIZ	YDR149C	0.00498281	-0.863353
ASCIZ	YDR151C	1.09124	0.301662
ASCIZ	YDR152W	0.817181	-0.489551
ASCIZ	YDR153C	2.9	0.0923809
ASCIZ	YDR155C	0.323883	0.370966
ASCIZ	YDR156W	0.164433	-0.330831
ASCIZ	YDR157W	0.0448453	-0.94767
ASCIZ	YDR162C	0.368728	-0.531027
ASCIZ	YDR163W	0.493298	0.833164
ASCIZ	YDR165W	0.0448453	0.392399
ASCIZ	YDR169C	2.13264	1.38104
ASCIZ	YDR171W	1.87852	-0.221508
ASCIZ	YDR178W	0.642782	-0.0881917
ASCIZ	YDR179W-A	0.109622	-0.115172
ASCIZ	YDR181C	0.837112	0.0567745
ASCIZ	YDR183W	0.428522	-0.356238
ASCIZ	YDR184C	0.56804	0.609484
ASCIZ	YDR185C	1.08625	0.402657
ASCIZ	YDR191W	1.60945	0.239265
ASCIZ	YDR192C	1.26563	0.267452
ASCIZ	YDR193W	1.03144	0.103401
ASCIZ	YDR198C	1.14106	1.02276
ASCIZ	YDR202C	0.807215	0.222073
ASCIZ	YDR205W	1.03144	-0.766215
ASCIZ	YDR206W	0.303951	-0.831695
ASCIZ	YDR209C	0.308934	-0.311759
ASCIZ	YDR210W	0.827146	-0.478566
ASCIZ	YDR213W	0.343814	-0.606822
ASCIZ	YDR214W	2.92491	2.06327
ASCIZ	YDR215C	0.313917	-0.110762
ASCIZ	YDR216W	0.667696	-0.23052
ASCIZ	YDR217C	0.40859	-0.129965
ASCIZ	YDR218C	0.144501	-0.840936
ASCIZ	YDR219C	0.573023	-0.264209
ASCIZ	YDR220C	0.737456	0.196951
ASCIZ	YDR221W	0.632817	-0.4455
ASCIZ	YDR222W	0.802232	0.209544
ASCIZ	YDR223W	1.98814	0.955032
ASCIZ	YDR229W	1.45498	0.554639
ASCIZ	YDR230W	0.264089	-0.594457
ASCIZ	YDR231C	0.154467	-0.532515
ASCIZ	YDR233C	0.891923	-0.618053
ASCIZ	YDR239C	2.01804	0.955588
ASCIZ	YDR244W	0.757387	-0.106656
ASCIZ	YDR247W	1.73402	1.27368
ASCIZ	YDR248C	0.961682	0.548696
ASCIZ	YDR249C	0.0896906	-0.864033
ASCIZ	YDR250C	0.767353	0.298297
ASCIZ	YDR251W	0.792267	-0.181527
ASCIZ	YDR252W	0.916837	0.145616
ASCIZ	YDR254W	0.164433	-0.408125
ASCIZ	YDR255C	0.00498281	-1.00796
ASCIZ	YDR256C	0.528178	-0.619646
ASCIZ	YDR257C	0.881957	0.141488
ASCIZ	YDR258C	0.224226	-1.05857
ASCIZ	YDR260C	0.383676	0.58914
ASCIZ	YDR261C	0.782301	-0.180885
ASCIZ	YDR262W	0.104639	-0.532517
ASCIZ	YDR263C	1.76391	0.750443
ASCIZ	YDR265W	0.114605	-1.01968
ASCIZ	YDR266C	0.707559	2.52108
ASCIZ	YDR269C	3.74209	2.97644
ASCIZ	YDR270W	0.00498281	-0.568142
ASCIZ	YDR271C	1.34536	0.0973956
ASCIZ	YDR272W	1.77886	1.44514
ASCIZ	YDR273W	0.707559	-0.367144
ASCIZ	YDR275W	0.398625	-0.410249
ASCIZ	YDR277C	0.229209	-0.157572
ASCIZ	YDR278C	0.293986	0.00525445
ASCIZ	YDR282C	0.388659	0.295954
ASCIZ	YDR285W	0.0697593	-0.275334
ASCIZ	YDR286C	0.488315	-0.215558
ASCIZ	YDR287W	0.0298969	-1.07904
ASCIZ	YDR290W	0.777318	-1.18782
ASCIZ	YDR291W	0.822164	0.612201
ASCIZ	YDR294C	0.842095	0.145008
ASCIZ	YDR295C	0.144501	-0.678068
ASCIZ	YDR297W	2.32697	0.507092
ASCIZ	YDR304C	1.32543	1.11824
ASCIZ	YDR305C	0.0548109	-0.851366
ASCIZ	YDR306C	0.104639	-0.754578
ASCIZ	YDR309C	1.2756	1.55328
ASCIZ	YDR312W	1.05636	1.19171
ASCIZ	YDR313C	1.35532	1.9035
ASCIZ	YDR314C	0.333848	-0.780703
ASCIZ	YDR319C	0.174398	-0.839421
ASCIZ	YDR321W	1.05137	1.10127
ASCIZ	YDR322W	0.19433	-0.236143
ASCIZ	YDR326C	2.31701	1.63809
ASCIZ	YDR329C	0.732473	1.05456
ASCIZ	YDR330W	0.0348797	-0.552098
ASCIZ	YDR332W	0.184364	-0.20351
ASCIZ	YDR333C	0.333848	-0.498317
ASCIZ	YDR336W	0.00996562	-1.66646
ASCIZ	YDR337W	2.09278	2.34843
ASCIZ	YEL001C	1.20086	-0.0528705
ASCIZ	YEL004W	1.36529	0.118751
ASCIZ	YEL005C	0.259106	-0.488403
ASCIZ	YEL006W	0.493298	0.00296388
ASCIZ	YEL008W	0.707559	1.40816
ASCIZ	YEL009C	0.204295	-0.397528
ASCIZ	YEL010W	1.07629	-0.157078
ASCIZ	YEL011W	3.86666	1.94643
ASCIZ	YEL012W	1.61443	0.0198269
ASCIZ	YEL014C	2.41168	1.32705
ASCIZ	YEL015W	0.652748	0.652256
ASCIZ	YEL017C-A	0.189347	-0.847865
ASCIZ	YEL020C	0.129553	-0.873249
ASCIZ	YEL023C	2.48642	2.5992
ASCIZ	YEL024W	0.114605	-0.366057
ASCIZ	YEL025C	1.64931	0.608446
ASCIZ	YEL028W	2.21237	0.352662
ASCIZ	YEL030W	1.43505	0.615049
ASCIZ	YEL031W	0.274055	0.422195
ASCIZ	YEL037C	0.498281	-0.329453
ASCIZ	YEL038W	0.767353	-0.385627
ASCIZ	YEL039C	0.438487	-0.421759
ASCIZ	YEL040W	1.14605	-0.303361
ASCIZ	YEL041W	2.09776	-0.0485471
ASCIZ	YEL042W	1.34038	0.390025
ASCIZ	YEL043W	0.702576	-0.346464
ASCIZ	YEL047C	3.91649	0.663403
ASCIZ	YEL048C	1.68419	-0.195256
ASCIZ	YEL049W	2.16752	0.243544
ASCIZ	YEL050C	0.279037	0.348728
ASCIZ	YEL052W	1.23574	-0.6881
ASCIZ	YEL053C	1.03642	-0.197281
ASCIZ	YEL056W	3.61254	2.38404
ASCIZ	YEL057C	0.717525	-0.880135
ASCIZ	YEL059W	3.23384	1.12386
ASCIZ	YEL060C	0.777318	0.106254
ASCIZ	YEL062W	0.92182	-0.61541
ASCIZ	YEL063C	0.353779	-0.878721
ASCIZ	YEL064C	1.16598	0.323491
ASCIZ	YEL065W	1.27062	-0.270871
ASCIZ	YEL066W	0.468384	-0.909861
ASCIZ	YEL067C	1.92835	-0.503765
ASCIZ	YEL068C	1.78883	-0.365754
ASCIZ	YEL071W	1.89845	-0.00853224
ASCIZ	YER001W	0.956699	-0.89713
ASCIZ	YER004W	0.752404	0.351172
ASCIZ	YER005W	0.617868	-0.256173
ASCIZ	YER007C-A	1.18093	0.327715
ASCIZ	YER011W	0.498281	-0.641929
ASCIZ	YER019C-A	0.951717	-0.347118
ASCIZ	YER020W	0.792267	-0.88194
ASCIZ	YER024W	0.906871	-0.613429
ASCIZ	YER028C	1.78385	0.381316
ASCIZ	YER030W	1.18093	-0.466907
ASCIZ	YER031C	0.582989	-0.383469
ASCIZ	YER032W	0.154467	-0.922847
ASCIZ	YER033C	0.438487	-0.5442
ASCIZ	YER034W	2.25721	1.61512
ASCIZ	YER038W-A	0.289003	-1.03099
ASCIZ	YER039C	0.433504	0.319411
ASCIZ	YER041W	0.383676	-0.578054
ASCIZ	YER042W	0.403608	-1.13452
ASCIZ	YER044C-A	2.8402	0.730188
ASCIZ	YER045C	1.35034	-0.0948499
ASCIZ	YER046W	5.3914	1.58718
ASCIZ	YER046W-A	0.323883	-0.600911
ASCIZ	YER047C	0.0298969	-0.51597
ASCIZ	YER048C	1.51477	1.25985
ASCIZ	YER049W	1.58453	0.222626
ASCIZ	YER051W	0.0597937	-0.56825
ASCIZ	YER053C	0.69261	-0.348889
ASCIZ	YER055C	2.06288	0.496399
ASCIZ	YER056C	0.647765	-0.596563
ASCIZ	YER056C-A	0.458418	-0.491384
ASCIZ	YER057C	3.25377	0.784067
ASCIZ	YER059W	0.822164	-1.12034
ASCIZ	YER060W	0.662714	-1.08132
ASCIZ	YER060W-A	1.72903	0.486682
ASCIZ	YER062C	0.682645	-0.118971
ASCIZ	YER063W	1.74897	-0.47819
ASCIZ	YER064C	1.17096	-0.630282
ASCIZ	YER065C	1.18591	0.0835496
ASCIZ	YER066W	1.19587	-0.575517
ASCIZ	YER067C-A	1.49484	-0.0230392
ASCIZ	YER067W	1.43007	0.184159
ASCIZ	YER071C	1.05137	-0.318263
ASCIZ	YER072W	0.19433	-0.754947
ASCIZ	YER073W	2.0579	-0.103844
ASCIZ	YER075C	2.74055	1.74124
ASCIZ	YER077C	0.129553	0.707107
ASCIZ	YER078C	0.433504	-0.421751
ASCIZ	YER079W	0.533161	-0.755269
ASCIZ	YER080W	0.60292	-0.653287
ASCIZ	YER081W	0.896906	-0.181787
ASCIZ	YER084W	0.0498281	-0.96334
ASCIZ	YER085C	2.07285	0.599971
ASCIZ	YER087C-A	1.83866	0.767528
ASCIZ	YER088C	0.837112	0.0930336
ASCIZ	YER089C	0.702576	-0.465255
ASCIZ	YER093C-A	1.95824	0.355077
ASCIZ	YER096W	0.842095	-1.1296
ASCIZ	YER097W	1.86357	0.445169
ASCIZ	YER098W	3.56769	0.355323
ASCIZ	YER101C	0.343814	-0.239083
ASCIZ	YER103W	0.144501	-1.20712
ASCIZ	YER106W	1.26563	-0.0420755
ASCIZ	YER108C	1.11117	0.991898
ASCIZ	YER109C	2.35687	1.20831
ASCIZ	YER113C	0.184364	-0.575744
ASCIZ	YER114C	0.523195	-0.126641
ASCIZ	YER115C	1.21082	0.0310044
ASCIZ	YER118C	0.44347	-0.342081
ASCIZ	YER119C	0.254123	-0.71761
ASCIZ	YER119C-A	0.0298969	-0.784273
ASCIZ	YER121W	1.5945	1.53806
ASCIZ	YER124C	1.05137	0.0979436
ASCIZ	YER128W	1.4201	0.338834
ASCIZ	YER130C	0.508247	0.3621
ASCIZ	YER131W	0.224226	0.363954
ASCIZ	YER132C	1.51976	0.146271
ASCIZ	YER134C	1.63934	1.91331
ASCIZ	YER135C	0.358762	-0.16957
ASCIZ	YER138C-A	0.15945	-1.19026
ASCIZ	YER139C	0.204295	-0.493877
ASCIZ	YER140W	2.18247	0.647443
ASCIZ	YER141W	1.20584	0.34968
ASCIZ	YER142C	0.767353	0.166231
ASCIZ	YER145C-A	0.518212	-0.0610642
ASCIZ	YER146W	0.244158	-0.659346
ASCIZ	YER148W	1.44003	0.591989
ASCIZ	YER149C	0.164433	0.287886
ASCIZ	YER153C	0.867009	-0.160314
ASCIZ	YER155C	0.0597937	-0.930824
ASCIZ	YER156C	1.06134	1.03306
ASCIZ	YER157W	0.279037	-1.03814
ASCIZ	YER160C	1.29055	-0.473537
ASCIZ	YER160C-A	0.463401	0.292034
ASCIZ	YER162C	0.0149484	-0.780534
ASCIZ	YER163C	2.47646	1.36412
ASCIZ	YER165C-A	0.662714	0.256959
ASCIZ	YER166W	0.503264	0.500411
ASCIZ	YER167W	0.239175	-1.08197
ASCIZ	YER168C	0.782301	0.647896
ASCIZ	YER169W	1.28556	2.39121
ASCIZ	YER171W	1.9134	1.02246
ASCIZ	YER172C	1.68917	0.294612
ASCIZ	YER172C-A	1.32044	0.0663569
ASCIZ	YER173W	0.69261	-0.28039
ASCIZ	YER174C	0.871992	-0.195805
ASCIZ	YER175C	1.42508	0.576479
ASCIZ	YER176W	0.323883	-0.771301
ASCIZ	YER177W	0.597937	-0.274075
ASCIZ	YER178W	1.86855	1.37332
ASCIZ	YER180C	0.259106	-0.52205
ASCIZ	YER181C	0.174398	-0.811374
ASCIZ	YER182W	0.632817	-0.276764
ASCIZ	YER183C	0.204295	-0.741544
ASCIZ	YER184C	0.219244	-0.922575
ASCIZ	YER185W	4.24037	2.01199
ASCIZ	YER186C	0.393642	-0.736225
ASCIZ	YER187W	0.802232	-0.06102
ASCIZ	YHL002W	3.54278	-0.348559
ASCIZ	YHL003C	5.07748	0.0769597
ASCIZ	YHL005C	0.901888	0.453519
ASCIZ	YHL006C	1.34536	0.275045
ASCIZ	YHL008C	0.617868	-0.776216
ASCIZ	YHL009C	0.164433	-0.463744
ASCIZ	YHL010C	1.15103	-0.319668
ASCIZ	YHL012W	0.847078	0.368295
ASCIZ	YHL013C	0.916837	0.778024
ASCIZ	YHL014C	0.817181	-1.2203
ASCIZ	YHL016C	0.667696	0.284512
ASCIZ	YHL017W	0.144501	-0.763447
ASCIZ	YHL019C	0.398625	-0.426811
ASCIZ	YHL020C	0.313917	0.970552
ASCIZ	YHL022C	1.06134	0.504457
ASCIZ	YHL023C	0.56804	-0.469136
ASCIZ	YHL024W	0.573023	-1.14456
ASCIZ	YHL026C	0.737456	0.070777
ASCIZ	YHL027W	0.323883	-0.89691
ASCIZ	YHL028W	1.59948	0.904852
ASCIZ	YHL029C	1.67921	-0.584945
ASCIZ	YHL030W	0.941751	-0.10573
ASCIZ	YHL034C	0.563057	-0.566537
ASCIZ	YHL035C	0.47835	-0.199587
ASCIZ	YHL036W	0.164433	-0.753477
ASCIZ	YHL037C	0.682645	0.0596797
ASCIZ	YHL038C	0.573023	-0.106028
ASCIZ	YHL039W	2.17749	0.774709
ASCIZ	YHL040C	0.179381	-1.24711
ASCIZ	YHL041W	1.61941	0.252195
ASCIZ	YHL042W	3.05944	0.734262
ASCIZ	YHL043W	1.20086	-0.404242
ASCIZ	YHL045W	1.2457	-0.0878
ASCIZ	YHL046C	0.12457	-0.703526
ASCIZ	YHL047C	1.93333	0.478679
ASCIZ	YHR001W-A	0.363745	-1.13281
ASCIZ	YHR003C	2.76048	-0.201519
ASCIZ	YHR006W	2.33694	-0.31533
ASCIZ	YHR009C	1.55464	-0.263026
ASCIZ	YHR012W	0.0747421	0.274795
ASCIZ	YHR014W	0.553092	0.444499
ASCIZ	YHR015W	1.44003	-0.205608
ASCIZ	YHR016C	1.87354	-0.242693
ASCIZ	YHR017W	2.76546	3.04881
ASCIZ	YHR018C	0.348797	-1.07513
ASCIZ	YHR022C	2.56615	2.10969
ASCIZ	YHR028C	2.35687	0.396817
ASCIZ	YHR031C	0.0448453	-0.75006
ASCIZ	YHR032W	0.323883	-0.526719
ASCIZ	YHR033W	2.24725	0.211979
ASCIZ	YHR035W	1.62938	-0.337325
ASCIZ	YHR037W	1.62938	0.982517
ASCIZ	YHR039C	0.483333	0.620418
ASCIZ	YHR043C	1.58952	0.885259
ASCIZ	YHR044C	1.35532	0.72928
ASCIZ	YHR045W	2.81529	0.828234
ASCIZ	YHR046C	0.179381	0.0460953
ASCIZ	YHR047C	0.677662	-0.411729
ASCIZ	YHR048W	0.00498281	-0.835177
ASCIZ	YHR049C-A	1.08625	0.185011
ASCIZ	YHR049W	1.35034	0.531818
ASCIZ	YHR050W	0.463401	0.847111
ASCIZ	YHR051W	0.403608	0.329732
ASCIZ	YHR057C	1.69914	1.3995
ASCIZ	YHR061C	1.11117	0.592746
ASCIZ	YHR073W	2.06787	1.03488
ASCIZ	YHR076W	0.518212	-0.212968
ASCIZ	YHR077C	0.0348797	-1.30254
ASCIZ	YHR078W	0.513229	-0.469091
ASCIZ	YHR079C	1.64433	0.911102
ASCIZ	YHR080C	0.807215	-0.311047
ASCIZ	YHR082C	0.88694	-0.165344
ASCIZ	YHR086W	0.722507	-0.910104
ASCIZ	YHR087W	1.08625	0.289281
ASCIZ	YHR092C	0.632817	-0.253844
ASCIZ	YHR093W	1.06134	-0.153542
ASCIZ	YHR094C	0.936768	-0.293024
ASCIZ	YHR095W	0.687628	-0.522759
ASCIZ	YHR096C	0.433504	-0.240343
ASCIZ	YHR097C	1.74398	1.61364
ASCIZ	YHR103W	1.33041	1.70129
ASCIZ	YHR104W	0.468384	-0.216821
ASCIZ	YHR105W	1.00154	0.510016
ASCIZ	YHR106W	1.17096	0.574729
ASCIZ	YHR108W	0.199312	-0.198551
ASCIZ	YHR109W	0.722507	-0.204986
ASCIZ	YHR110W	1.95326	2.0795
ASCIZ	YHR112C	0.906871	1.08535
ASCIZ	YHR113W	2.19742	2.35063
ASCIZ	YHR114W	0.28402	-0.941103
ASCIZ	YHR115C	0.707559	0.510611
ASCIZ	YHR121W	1.91838	0.411497
ASCIZ	YHR123W	0.812198	-0.152959
ASCIZ	YHR124W	1.53471	1.11025
ASCIZ	YHR125W	0.413573	-0.649891
ASCIZ	YHR126C	0.56804	-1.06756
ASCIZ	YHR127W	4.55429	0.887777
ASCIZ	YHR130C	0.707559	-0.317839
ASCIZ	YHR131C	0.931785	-0.736205
ASCIZ	YHR132C	1.16598	-0.0996828
ASCIZ	YHR133C	0.697593	0.560783
ASCIZ	YHR135C	0.488315	-0.0594538
ASCIZ	YHR136C	0.92182	0.286971
ASCIZ	YHR137W	0.388659	-0.650084
ASCIZ	YHR138C	1.26065	-0.532282
ASCIZ	YHR139C	0.244158	-1.02274
ASCIZ	YHR139C-A	1.51976	0.377037
ASCIZ	YHR140W	0.991579	-0.155916
ASCIZ	YHR142W	0.632817	1.05461
ASCIZ	YHR143W	0.707559	0.0296477
ASCIZ	YHR146W	1.16099	-0.0730518
ASCIZ	YHR150W	0.328865	-0.542197
ASCIZ	YHR151C	0.802232	0.609627
ASCIZ	YHR152W	1.29055	0.283631
ASCIZ	YHR153C	0.931785	0.494337
ASCIZ	YHR155W	0.453436	-0.949758
ASCIZ	YHR156C	1.09622	0.908131
ASCIZ	YHR157W	0.293986	-0.543482
ASCIZ	YHR158C	1.86855	1.20956
ASCIZ	YHR159W	0.946734	0.647232
ASCIZ	YHR160C	0.423539	-0.772004
ASCIZ	YHR161C	0.587971	-0.579779
ASCIZ	YHR162W	1.25567	0.309791
ASCIZ	YHR163W	1.26563	1.72004
ASCIZ	YHR167W	0.717525	0.324113
ASCIZ	YHR171W	0.797249	-0.418979
ASCIZ	YHR175W	0.00498281	#DIV/0!
ASCIZ	YHR177W	0.807215	-0.479683
ASCIZ	YHR179W	0.19433	-0.839001
ASCIZ	YHR180W	1.53471	-0.695005
ASCIZ	YHR181W	1.86855	0.403834
ASCIZ	YHR182W	1.34536	0.535122
ASCIZ	YHR184W	0.423539	-0.947363
ASCIZ	YHR185C	2.30704	1.20649
ASCIZ	YHR189W	0.209278	-1.08659
ASCIZ	YHR195W	1.53969	2.54187
ASCIZ	YHR198C	0.289003	-1.19532
ASCIZ	YHR199C	0.3189	-0.78082
ASCIZ	YHR202W	0.473367	-0.579832
ASCIZ	YHR204W	0.468384	-0.0354233
ASCIZ	YHR206W	0.528178	-0.444897
ASCIZ	YHR207C	0.597937	0.137084
ASCIZ	YHR209W	3.03951	2.40119
ASCIZ	YHR210C	0.508247	-0.236006
ASCIZ	YIL001W	1.32543	0.298688
ASCIZ	YIL002C	0.333848	-0.70987
ASCIZ	YIL005W	0.797249	0.633273
ASCIZ	YIL006W	3.52783	1.39072
ASCIZ	YIL007C	1.34038	-0.480297
ASCIZ	YIL009W	3.09931	-0.289831
ASCIZ	YIL010W	6.13882	1.0036
ASCIZ	YIL011W	3.46305	3.39149
ASCIZ	YIL012W	2.48642	3.42782
ASCIZ	YIL013C	1.42508	0.26842
ASCIZ	YIL015W	0.712542	-0.252619
ASCIZ	YIL016W	0.787284	0.484918
ASCIZ	YIL020C	0.149484	-0.77209
ASCIZ	YIL023C	2.04793	2.41035
ASCIZ	YIL024C	0.378694	-0.233802
ASCIZ	YIL027C	0.0946734	-0.372708
ASCIZ	YIL028W	1.97319	1.53929
ASCIZ	YIL029C	0.298969	-0.695742
ASCIZ	YIL032C	0.926803	0.305857
ASCIZ	YIL036W	0.254123	-0.608802
ASCIZ	YIL037C	0.0498281	-0.317954
ASCIZ	YIL038C	1.37027	-0.94198
ASCIZ	YIL042C	0.229209	-0.916489
ASCIZ	YIL045W	0.518212	-0.348547
ASCIZ	YIL050W	0.179381	-1.04956
ASCIZ	YIL053W	0.199312	-0.595382
ASCIZ	YIL054W	1.13608	-0.09589
ASCIZ	YIL055C	1.17096	-0.75478
ASCIZ	YIL056W	5.73023	0.696535
ASCIZ	YIL057C	0.0597937	-0.625787
ASCIZ	YIL059C	4.02611	0.819745
ASCIZ	YIL060W	0.209278	-0.30907
ASCIZ	YIL064W	1.22079	0.442205
ASCIZ	YIL065C	0.00498281	-0.832221
ASCIZ	YIL066C	3.05944	-0.129033
ASCIZ	YIL067C	0.338831	-0.531339
ASCIZ	YIL070C	1.78385	-0.37505
ASCIZ	YIL071C	2.01804	-0.611973
ASCIZ	YIL072W	0.19433	-0.648801
ASCIZ	YIL073C	0.00996562	-1.15723
ASCIZ	YIL074C	3.96632	-0.0643114
ASCIZ	YIL077C	0.677662	-0.107772
ASCIZ	YIL084C	1.09622	0.246594
ASCIZ	YIL085C	2.25223	0.0633859
ASCIZ	YIL086C	0.72749	-0.74425
ASCIZ	YIL087C	3.62749	1.11496
ASCIZ	YIL088C	1.55464	-0.455919
ASCIZ	YIL089W	3.32353	-0.60022
ASCIZ	YIL090W	0.134536	-0.910091
ASCIZ	YIL092W	4.03109	0.692253
ASCIZ	YIL093C	0.00498281	-0.579416
ASCIZ	YIL094C	0.722507	0.442275
ASCIZ	YIL095W	0.69261	-0.536384
ASCIZ	YIL096C	1.51477	0.815079
ASCIZ	YIL098C	1.45498	-0.215186
ASCIZ	YIL099W	2.88006	0.990976
ASCIZ	YIL100W	0.229209	0.683834
ASCIZ	YIL101C	0.144501	-0.890777
ASCIZ	YIL102C	0.548109	-0.151029
ASCIZ	YIL105C	0.204295	-1.31462
ASCIZ	YIL108W	3.37336	0.943947
ASCIZ	YIL111W	1.14605	0.240415
ASCIZ	YIL112W	0.289003	-0.451886
ASCIZ	YIL113W	0.413573	-0.250031
ASCIZ	YIL114C	2.10275	0.102632
ASCIZ	YIL116W	0.00996562	-0.470416
ASCIZ	YIL117C	1.73402	0.364763
ASCIZ	YIL119C	0.328865	-0.661645
ASCIZ	YIL120W	3.42319	-1.00559
ASCIZ	YIL121W	1.31048	0.921908
ASCIZ	YIL123W	0.3189	-0.259427
ASCIZ	YIL124W	0.926803	-0.581462
ASCIZ	YIL125W	0.587971	0.12989
ASCIZ	YIL130W	1.17594	-0.870221
ASCIZ	YIL131C	3.91649	2.35955
ASCIZ	YIL132C	2.00309	0.254039
ASCIZ	YIL133C	0.134536	-0.361517
ASCIZ	YIL134W	0.174398	-0.258273
ASCIZ	YIL135C	1.65429	-0.0887047
ASCIZ	YIL137C	2.42165	0.476768
ASCIZ	YIL138C	1.93831	1.20636
ASCIZ	YIL139C	0.0797249	-0.539078
ASCIZ	YIL140W	2.31701	0.371604
ASCIZ	YIL141W	2.31202	0.498942
ASCIZ	YIL145C	3.14914	1.31213
ASCIZ	YIL146C	3.80188	0.803591
ASCIZ	YIL152W	2.83522	1.10153
ASCIZ	YIL153W	0.0298969	-0.626625
ASCIZ	YIL155C	1.80876	0.311871
ASCIZ	YIL156W	1.53969	-0.512439
ASCIZ	YIL157C	0.652748	-1.13567
ASCIZ	YIL159W	0.712542	-0.725902
ASCIZ	YIL160C	1.03642	-0.352287
ASCIZ	YIL162W	0.951717	-1.43239
ASCIZ	YIL163C	2.71065	0.695685
ASCIZ	YIL164C	2.28711	0.596341
ASCIZ	YIL165C	1.49484	-0.453756
ASCIZ	YIL166C	1.55464	0.743773
ASCIZ	YIL167W	0.219244	-1.6204
ASCIZ	YIL168W	4.34501	0.637795
ASCIZ	YIL170W	2.77542	-0.268569
ASCIZ	YIL173W	1.49983	-0.926361
ASCIZ	YIR001C	1.92835	-0.405998
ASCIZ	YIR002C	1.19089	0.00193157
ASCIZ	YIR003W	0.697593	-1.00133
ASCIZ	YIR004W	0.3189	-0.347173
ASCIZ	YIR007W	3.40824	0.0702398
ASCIZ	YIR013C	3.14415	-0.0478051
ASCIZ	YIR014W	3.05944	-0.438562
ASCIZ	YIR016W	3.78195	-0.302777
ASCIZ	YJL004C	0.338831	-0.854894
ASCIZ	YJL005W	0.383676	0.169877
ASCIZ	YJL007C	2.30206	0.176011
ASCIZ	YJL012C	0.398625	-0.574766
ASCIZ	YJL013C	0.916837	-0.485008
ASCIZ	YJL016W	2.91993	0.0485358
ASCIZ	YJL017W	0.842095	-0.371904
ASCIZ	YJL021C	2.3768	1.70286
ASCIZ	YJL022W	1.16099	1.6674
ASCIZ	YJL023C	0.313917	-0.562788
ASCIZ	YJL024C	0.373711	-0.363604
ASCIZ	YJL027C	3.13917	1.09644
ASCIZ	YJL030W	1.26563	-0.368631
ASCIZ	YJL036W	3.20893	0.424289
ASCIZ	YJL037W	3.55274	-0.450615
ASCIZ	YJL038C	2.51134	0.0189068
ASCIZ	YJL042W	3.16907	-0.0229025
ASCIZ	YJL043W	1.66426	-0.614133
ASCIZ	YJL044C	2.35687	0.274956
ASCIZ	YJL045W	1.48488	-0.86744
ASCIZ	YJL047C	0.00498281	-0.747621
ASCIZ	YJL048C	5.23195	1.64556
ASCIZ	YJL049W	5.13229	1.03059
ASCIZ	YJL051W	6.62215	1.17441
ASCIZ	YJL052W	0.279037	-0.568419
ASCIZ	YJL053W	0.219244	-1.05169
ASCIZ	YJL055W	1.77388	-0.150857
ASCIZ	YJL057C	2.18745	0.564717
ASCIZ	YJL058C	4.7536	0.69608
ASCIZ	YJL060W	3.8268	0.361038
ASCIZ	YJL064W	4.78848	0.788388
ASCIZ	YJL065C	1.70412	0.500011
ASCIZ	YJL066C	1.09124	-0.554359
ASCIZ	YJL067W	3.47302	0.82632
ASCIZ	YJL068C	1.95824	-0.642315
ASCIZ	YJL070C	1.65429	-0.799921
ASCIZ	YJL071W	0.69261	-1.04543
ASCIZ	YJL073W	2.8402	0.586336
ASCIZ	YJL077C	3.02457	-0.453642
ASCIZ	YJL078C	1.7689	-0.163338
ASCIZ	YJL079C	1.96323	-0.192823
ASCIZ	YJL082W	1.38024	-0.278904
ASCIZ	YJL083W	2.49639	-0.697444
ASCIZ	YJL084C	4.58418	0.762239
ASCIZ	YJL089W	0.782301	-1.21405
ASCIZ	YJL092W	0.00498281	-1.03018
ASCIZ	YJL093C	2.9	0.147059
ASCIZ	YJL094C	3.72216	1.13045
ASCIZ	YJL095W	0.44347	-0.594888
ASCIZ	YJL098W	3.9713	0.625698
ASCIZ	YJL099W	0.582989	-0.853077
ASCIZ	YJL100W	2.80034	-0.392279
ASCIZ	YJL101C	1.35034	0.4175
ASCIZ	YJL103C	1.28556	0.0616106
ASCIZ	YJL105W	0.767353	0.088731
ASCIZ	YJL106W	3.19398	-0.0724897
ASCIZ	YJL107C	3.21889	-0.273366
ASCIZ	YJL108C	1.13608	-0.525483
ASCIZ	YJL110C	1.90343	-0.0413295
ASCIZ	YJL112W	3.49295	1.35413
ASCIZ	YJL116C	2.49639	-0.386192
ASCIZ	YJL117W	0.254123	1.16571
ASCIZ	YJL118W	3.53779	0.229341
ASCIZ	YJL119C	4.36992	0.521805
ASCIZ	YJL120W	0.169416	-0.548652
ASCIZ	YJL122W	2.09776	-0.480352
ASCIZ	YJL123C	1.73402	0.212301
ASCIZ	YJL124C	0.189347	-0.802057
ASCIZ	YJL126W	3.29862	1.27376
ASCIZ	YJL130C	0.179381	-0.770355
ASCIZ	YJL131C	0.622851	0.85591
ASCIZ	YJL132W	2.02302	-0.192141
ASCIZ	YJL133W	0.881957	-0.152682
ASCIZ	YJL134W	2.32199	-0.783172
ASCIZ	YJL135W	2.06787	-0.422953
ASCIZ	YJL141C	0.229209	-0.584902
ASCIZ	YJL142C	0.388659	-0.915258
ASCIZ	YJL144W	0.00498281	-1.03145
ASCIZ	YJL145W	0.822164	-0.0881991
ASCIZ	YJL146W	0.483333	-0.229121
ASCIZ	YJL148W	0.398625	-0.363752
ASCIZ	YJL149W	0.732473	0.448119
ASCIZ	YJL150W	2.89501	2.0131
ASCIZ	YJL152W	1.77886	0.987596
ASCIZ	YJL153C	0.891923	0.51296
ASCIZ	YJL154C	0.976631	0.782714
ASCIZ	YJL157C	1.06632	-0.0759321
ASCIZ	YJL158C	0.209278	-0.942535
ASCIZ	YJL162C	0.239175	0.31016
ASCIZ	YJL164C	0.742439	1.09734
ASCIZ	YJL166W	0.343814	-0.132059
ASCIZ	YJL170C	0.857043	-0.353162
ASCIZ	YJL171C	0.328865	-1.13374
ASCIZ	YJL177W	0.00498281	-0.896224
ASCIZ	YJL178C	0.832129	0.582968
ASCIZ	YJL181W	2.2323	0.83139
ASCIZ	YJL182C	1.00653	0.153651
ASCIZ	YJL185C	0.234192	-0.651343
ASCIZ	YJL186W	0.573023	-0.771721
ASCIZ	YJL187C	0.767353	-0.55435
ASCIZ	YJL190C	1.02148	0.773319
ASCIZ	YJL193W	0.19433	-0.602532
ASCIZ	YJL197W	0.00498281	-1.33424
ASCIZ	YJL198W	0.737456	0.149592
ASCIZ	YJL199C	0.28402	-0.562747
ASCIZ	YJL206C-A	1.03642	0.64924
ASCIZ	YJL207C	0.906871	-0.266365
ASCIZ	YJL209W	0.533161	0.246153
ASCIZ	YJL210W	0.493298	-1.16918
ASCIZ	YJL211C	1.87354	0.148477
ASCIZ	YJL212C	1.97818	0.199475
ASCIZ	YJL213W	1.85361	0.351014
ASCIZ	YJL214W	2.21735	0.75072
ASCIZ	YJL215C	0.737456	-0.931328
ASCIZ	YJL216C	0.906871	-0.709789
ASCIZ	YJL217W	0.189347	-0.855669
ASCIZ	YJL218W	0.0946734	-0.854082
ASCIZ	YJR001W	1.35034	-0.204793
ASCIZ	YJR003C	1.66426	0.276402
ASCIZ	YJR004C	2.53625	0.0059702
ASCIZ	YJR005W	1.58952	0.497789
ASCIZ	YJR008W	1.17096	0.247152
ASCIZ	YJR009C	3.52285	1.05449
ASCIZ	YJR010C-A	0.00498281	-0.598286
ASCIZ	YJR010W	1.39519	0.25016
ASCIZ	YJR011C	1.41014	1.38306
ASCIZ	YJR014W	1.1311	-0.0286286
ASCIZ	YJR015W	1.38522	-0.1795
ASCIZ	YJR019C	1.38522	-0.627473
ASCIZ	YJR020W	2.66082	0.704866
ASCIZ	YJR021C	1.08127	0.383737
ASCIZ	YJR024C	0.378694	-0.739796
ASCIZ	YJR025C	1.41014	-0.219087
ASCIZ	YJR026W	1.49484	0.209444
ASCIZ	YJR030C	1.36031	2.88578
ASCIZ	YJR031C	1.37027	-0.413053
ASCIZ	YJR034W	0.498281	0.0422784
ASCIZ	YJR035W	0.822164	-0.828733
ASCIZ	YJR036C	1.53969	0.0222216
ASCIZ	YJR037W	3.57766	0.373025
ASCIZ	YJR038C	3.63247	1.43037
ASCIZ	YJR039W	1.43007	0.822635
ASCIZ	YJR040W	0.732473	-0.347213
ASCIZ	YJR043C	0.149484	-0.0964124
ASCIZ	YJR044C	0.274055	-0.0376322
ASCIZ	YJR048W	1.50481	0.213106
ASCIZ	YJR049C	0.657731	-0.153934
ASCIZ	YJR050W	0.274055	-0.499959
ASCIZ	YJR051W	2.78041	-0.0404554
ASCIZ	YJR052W	0.747421	-0.53749
ASCIZ	YJR053W	1.82371	0.738266
ASCIZ	YJR054W	0.578006	-0.625377
ASCIZ	YJR056C	1.50481	0.24552
ASCIZ	YJR058C	3.65738	1.74352
ASCIZ	YJR059W	0.254123	-0.640715
ASCIZ	YJR060W	0.114605	-0.926681
ASCIZ	YJR061W	1.8835	-0.173245
ASCIZ	YJR062C	3.17903	0.765188
ASCIZ	YJR066W	0.298969	-0.61394
ASCIZ	YJR069C	0.582989	-0.442461
ASCIZ	YJR073C	0.558075	0.131369
ASCIZ	YJR075W	1.0713	0.306908
ASCIZ	YJR078W	4.28023	0.733353
ASCIZ	YJR079W	0.428522	2.27478
ASCIZ	YJR080C	0.388659	-0.84175
ASCIZ	YJR082C	2.5213	-0.291088
ASCIZ	YJR083C	0.204295	-1.10354
ASCIZ	YJR084W	1.05137	-0.302113
ASCIZ	YJR087W	2.7256	-0.382646
ASCIZ	YJR088C	0.563057	0.497242
ASCIZ	YJR091C	2.70068	0.164287
ASCIZ	YJR092W	4.03109	0.76398
ASCIZ	YJR094C	4.06597	0.290623
ASCIZ	YJR094W-A	0.533161	-0.384489
ASCIZ	YJR095W	1.76391	-0.0155345
ASCIZ	YJR096W	2.08281	-1.07984
ASCIZ	YJR097W	0.991579	-0.721331
ASCIZ	YJR098C	2.8701	-0.458829
ASCIZ	YJR099W	2.83522	0.417177
ASCIZ	YJR100C	4.27525	0.885998
ASCIZ	YJR102C	0.19433	-0.919897
ASCIZ	YJR103W	0.468384	-0.643031
ASCIZ	YJR106W	1.14106	-0.513356
ASCIZ	YJR107W	2.98969	-0.466115
ASCIZ	YJR108W	1.21082	0.169586
ASCIZ	YJR109C	2.63591	-0.779951
ASCIZ	YJR110W	0.926803	-0.439778
ASCIZ	YJR111C	0.174398	-0.621989
ASCIZ	YJR115W	3.95137	0.755327
ASCIZ	YJR116W	4.32508	0.6872
ASCIZ	YJR117W	1.73402	-1.12116
ASCIZ	YJR119C	2.97474	0.654977
ASCIZ	YJR120W	0.832129	0.13662
ASCIZ	YJR124C	0.931785	-0.673045
ASCIZ	YJR125C	0.00498281	-0.84434
ASCIZ	YJR126C	1.7689	0.932132
ASCIZ	YJR127C	3.75206	1.54852
ASCIZ	YJR128W	2.07783	0.494884
ASCIZ	YJR129C	0.498281	-0.901902
ASCIZ	YJR130C	2.37182	1.67753
ASCIZ	YJR131W	3.64742	0.298351
ASCIZ	YJR133W	6.18367	1.16126
ASCIZ	YJR134C	1.03642	-0.492448
ASCIZ	YJR135C	0.607903	0.130818
ASCIZ	YJR137C	2.72061	0.0185143
ASCIZ	YJR140C	1.24072	1.9522
ASCIZ	YJR142W	2.60103	1.87182
ASCIZ	YJR144W	0.56804	-0.0915881
ASCIZ	YJR146W	3.69724	-0.657781
ASCIZ	YJR147W	0.269072	-1.11881
ASCIZ	YJR148W	2.45652	0.00179714
ASCIZ	YJR149W	2.30206	2.09881
ASCIZ	YJR150C	2.23728	-0.377297
ASCIZ	YJR152W	3.48298	1.31953
ASCIZ	YJR153W	4.2603	0.502268
ASCIZ	YJR154W	1.24072	0.0935097
ASCIZ	YLL001W	0.214261	-0.156494
ASCIZ	YLL005C	1.74897	0.282945
ASCIZ	YLL006W	0.00498281	-0.563545
ASCIZ	YLL007C	2.3768	-0.979092
ASCIZ	YLL009C	0.792267	0.128604
ASCIZ	YLL010C	2.16752	0.339591
ASCIZ	YLL012W	2.67079	1.25611
ASCIZ	YLL013C	0.752404	-0.142691
ASCIZ	YLL014W	0.697593	0.0644671
ASCIZ	YLL015W	0.662714	-0.222934
ASCIZ	YLL016W	1.33041	0.194419
ASCIZ	YLL017W	0.951717	-0.00974868
ASCIZ	YLL019C	0.483333	-0.554086
ASCIZ	YLL020C	1.25069	0.531817
ASCIZ	YLL021W	0.0548109	-0.703135
ASCIZ	YLL024C	0.652748	-0.888636
ASCIZ	YLL026W	1.32543	0.0950556
ASCIZ	YLL028W	1.80378	0.10172
ASCIZ	YLL030C	3.57766	0.65688
ASCIZ	YLL032C	0.289003	-1.07554
ASCIZ	YLL038C	0.3189	-0.126912
ASCIZ	YLL039C	0.862026	0.413787
ASCIZ	YLL041C	0.513229	0.395017
ASCIZ	YLL042C	3.99123	0.903462
ASCIZ	YLL043W	0.00498281	-0.739499
ASCIZ	YLL044W	0.0398625	-0.406909
ASCIZ	YLL046C	7.07061	2.2798
ASCIZ	YLL047W	3.19398	-0.0128958
ASCIZ	YLL048C	0.931785	-0.765215
ASCIZ	YLL051C	1.11615	-0.912173
ASCIZ	YLL052C	1.80876	-0.173751
ASCIZ	YLL053C	2.56615	-0.0807735
ASCIZ	YLL054C	2.38178	-0.0606308
ASCIZ	YLL055W	1.31546	-0.253752
ASCIZ	YLL056C	2.54622	0.287913
ASCIZ	YLL057C	2.50635	0.942029
ASCIZ	YLL058W	2.83024	-0.377523
ASCIZ	YLL059C	0.88694	-0.421627
ASCIZ	YLL060C	6.05411	0.900109
ASCIZ	YLL061W	1.96821	-0.365903
ASCIZ	YLL062C	1.94828	0.470507
ASCIZ	YLL063C	1.93333	1.30368
ASCIZ	YLR001C	1.58952	-0.491795
ASCIZ	YLR003C	0.503264	-1.00566
ASCIZ	YLR004C	1.50979	-0.0617921
ASCIZ	YLR006C	0.702576	-0.0639043
ASCIZ	YLR011W	2.49639	0.396318
ASCIZ	YLR012C	1.00653	-0.688306
ASCIZ	YLR013W	1.00653	-0.452569
ASCIZ	YLR014C	0.612886	-0.353301
ASCIZ	YLR015W	0.348797	-0.423537
ASCIZ	YLR016C	1.69416	0.274439
ASCIZ	YLR017W	2.88006	0.408878
ASCIZ	YLR018C	0.916837	-0.0171279
ASCIZ	YLR019W	3.13917	-0.554158
ASCIZ	YLR020C	0.717525	-0.79546
ASCIZ	YLR023C	1.55464	0.780452
ASCIZ	YLR024C	1.29055	0.770665
ASCIZ	YLR025W	0.528178	-0.308939
ASCIZ	YLR028C	0.901888	-0.604401
ASCIZ	YLR030W	2.96477	0.737665
ASCIZ	YLR031W	1.05636	-0.0679242
ASCIZ	YLR034C	2.57611	1.20696
ASCIZ	YLR035C	1.80876	1.3461
ASCIZ	YLR036C	2.01804	1.09735
ASCIZ	YLR037C	3.24879	1.89345
ASCIZ	YLR038C	0.189347	-1.06874
ASCIZ	YLR039C	0.523195	-0.0771693
ASCIZ	YLR040C	0.677662	-0.620952
ASCIZ	YLR041W	1.67422	0.120818
ASCIZ	YLR042C	1.90343	0.0897579
ASCIZ	YLR043C	0.463401	-0.986623
ASCIZ	YLR046C	0.712542	0.353999
ASCIZ	YLR047C	2.86512	0.505463
ASCIZ	YLR049C	1.12113	0.730428
ASCIZ	YLR050C	1.64931	-0.514681
ASCIZ	YLR053C	0.587971	-0.129845
ASCIZ	YLR054C	0.368728	0.451525
ASCIZ	YLR055C	0.104639	-0.570869
ASCIZ	YLR057W	0.398625	-0.387763
ASCIZ	YLR058C	0.403608	-0.742383
ASCIZ	YLR059C	0.214261	-0.815627
ASCIZ	YLR063W	0.523195	-0.0973416
ASCIZ	YLR064W	1.40017	0.416425
ASCIZ	YLR070C	3.13419	1.22515
ASCIZ	YLR072W	2.36185	1.01969
ASCIZ	YLR073C	2.17749	1.34464
ASCIZ	YLR077W	1.36529	-0.550052
ASCIZ	YLR080W	2.12268	0.444679
ASCIZ	YLR081W	0.717525	-0.709127
ASCIZ	YLR082C	2.37182	1.00292
ASCIZ	YLR083C	1.67921	1.20776
ASCIZ	YLR084C	0.40859	-0.012089
ASCIZ	YLR085C	0.672679	0.304363
ASCIZ	YLR089C	0.244158	-0.605389
ASCIZ	YLR090W	0.652748	0.651135
ASCIZ	YLR092W	0.244158	-0.281332
ASCIZ	YLR093C	0.323883	0.19449
ASCIZ	YLR094C	0.343814	-0.17179
ASCIZ	YLR095C	1.26065	0.406666
ASCIZ	YLR096W	3.35343	2.58048
ASCIZ	YLR097C	1.23574	-0.0663557
ASCIZ	YLR098C	0.802232	-0.197944
ASCIZ	YLR099C	0.139519	-1.18624
ASCIZ	YLR102C	0.752404	0.617096
ASCIZ	YLR104W	1.66426	0.36887
ASCIZ	YLR107W	1.93333	0.523607
ASCIZ	YLR108C	1.38024	-0.0569516
ASCIZ	YLR109W	0.672679	-0.371519
ASCIZ	YLR110C	0.767353	-0.249206
ASCIZ	YLR112W	0.92182	-0.541237
ASCIZ	YLR114C	0.916837	-0.460723
ASCIZ	YLR118C	0.393642	-1.22371
ASCIZ	YLR119W	0.931785	-0.652258
ASCIZ	YLR120C	0.72749	1.00163
ASCIZ	YLR121C	1.00653	-0.513323
ASCIZ	YLR122C	2.77542	0.93767
ASCIZ	YLR123C	1.09124	-0.800566
ASCIZ	YLR124W	4.02113	2.61991
ASCIZ	YLR125W	1.16598	0.155818
ASCIZ	YLR126C	0.47835	-0.747303
ASCIZ	YLR128W	0.254123	-0.578483
ASCIZ	YLR130C	1.52972	0.76477
ASCIZ	YLR131C	0.313917	-1.12476
ASCIZ	YLR133W	0.24914	-0.711321
ASCIZ	YLR134W	1.09124	1.46252
ASCIZ	YLR135W	1.11615	0.410719
ASCIZ	YLR136C	0.47835	-0.185845
ASCIZ	YLR137W	1.89845	1.3559
ASCIZ	YLR138W	0.772335	0.244467
ASCIZ	YLR142W	4.27525	3.7474
ASCIZ	YLR143W	0.0747421	-0.616884
ASCIZ	YLR144C	0.722507	0.195722
ASCIZ	YLR150W	0.279037	-0.421895
ASCIZ	YLR151C	0.254123	-0.762944
ASCIZ	YLR152C	1.15601	0.147185
ASCIZ	YLR154C	0.85206	0.734286
ASCIZ	YLR164W	1.64433	0.656631
ASCIZ	YLR165C	0.438487	-0.438181
ASCIZ	YLR168C	0.0896906	-1.08167
ASCIZ	YLR169W	0.204295	-0.737346
ASCIZ	YLR170C	0.941751	0.453153
ASCIZ	YLR171W	0.896906	0.0765331
ASCIZ	YLR172C	1.01649	0.795232
ASCIZ	YLR173W	2.34192	2.51709
ASCIZ	YLR174W	1.66924	1.81881
ASCIZ	YLR177W	1.50481	1.55415
ASCIZ	YLR178C	0.592954	-0.531337
ASCIZ	YLR179C	0.279037	-0.456079
ASCIZ	YLR180W	0.293986	-0.725724
ASCIZ	YLR183C	1.68917	2.03161
ASCIZ	YLR187W	0.119587	-0.830944
ASCIZ	YLR188W	1.57955	0.817572
ASCIZ	YLR189C	1.4201	0.586227
ASCIZ	YLR191W	0.662714	0.194781
ASCIZ	YLR192C	1.33041	-0.798397
ASCIZ	YLR194C	0.926803	0.810647
ASCIZ	YLR201C	0.597937	0.190678
ASCIZ	YLR202C	0.104639	-0.239861
ASCIZ	YLR203C	0.00498281	-1.48481
ASCIZ	YLR205C	0.0697593	-1.4026
ASCIZ	YLR206W	1.01151	1.3245
ASCIZ	YLR207W	1.15601	0.0827627
ASCIZ	YLR209C	1.01649	-0.61011
ASCIZ	YLR210W	1.06632	-0.250054
ASCIZ	YLR211C	0.72749	-0.238552
ASCIZ	YLR213C	0.209278	-0.553328
ASCIZ	YLR214W	0.632817	0.531809
ASCIZ	YLR218C	0.343814	-0.332038
ASCIZ	YLR219W	0.767353	0.225757
ASCIZ	YLR220W	1.01151	0.274555
ASCIZ	YLR224W	2.29708	0.0977023
ASCIZ	YLR225C	0.881957	-0.345395
ASCIZ	YLR227C	0.338831	-0.300781
ASCIZ	YLR420W	0.548109	-0.213243
ASCIZ	YLR451W	0.244158	-0.622493
ASCIZ	YML001W	0.498281	-0.680478
ASCIZ	YML002W	1.60945	1.41225
ASCIZ	YML003W	0.777318	-0.364351
ASCIZ	YML004C	0.717525	-0.303893
ASCIZ	YML005W	0.538143	0.0219298
ASCIZ	YML006C	0.936768	0.152021
ASCIZ	YML007W	1.3055	0.44099
ASCIZ	YML009c	2.12268	-0.327364
ASCIZ	YML011C	1.95824	-0.630415
ASCIZ	YML012W	1.37027	1.64597
ASCIZ	YML016C	0.333848	-0.216471
ASCIZ	YML017W	1.00154	-0.836159
ASCIZ	YML018C	0.12457	-0.599851
ASCIZ	YML019W	1.02646	-0.151064
ASCIZ	YML020W	0.911854	-0.115278
ASCIZ	YML022W	2.68573	2.13138
ASCIZ	YML027W	0.548109	-0.391651
ASCIZ	YML028W	0.941751	1.16062
ASCIZ	YML029W	2.92491	1.43482
ASCIZ	YML030W	0.00996562	-0.686237
ASCIZ	YML031W	4.04604	0.399244
ASCIZ	YML032C-A	0.313917	-0.860321
ASCIZ	YML033W	0.56804	0.161962
ASCIZ	YML035C-A	0.254123	-0.62353
ASCIZ	YML036W	4.23041	-0.230665
ASCIZ	YML037C	1.51976	0.011267
ASCIZ	YML038C	2.30206	0.480218
ASCIZ	YML042W	0.812198	-0.897271
ASCIZ	YML048W	0.428522	-0.357399
ASCIZ	YML048W-A	0.129553	-0.664964
ASCIZ	YML050W	2.8402	0.413811
ASCIZ	YML051W	1.07629	-0.640867
ASCIZ	YML052W	1.53969	0.120703
ASCIZ	YML053C	1.48488	0.448873
ASCIZ	YML054C	1.29055	1.00118
ASCIZ	YML055W	0.677662	-0.220067
ASCIZ	YML056C	1.92835	1.32665
ASCIZ	YML057W	0.767353	-0.367308
ASCIZ	YML058C-A	1.23574	1.1577
ASCIZ	YML058W	0.423539	-0.844713
ASCIZ	YML059C	0.47835	-0.669401
ASCIZ	YML060W	0.463401	-0.287221
ASCIZ	YML062C	0.807215	0.459774
ASCIZ	YML066C	2.77044	0.332994
ASCIZ	YML067C	0.303951	0.40158
ASCIZ	YML068W	2.28213	0.935987
ASCIZ	YML070W	1.76391	0.75069
ASCIZ	YML071C	1.63436	1.07895
ASCIZ	YML074C	2.24226	0.328929
ASCIZ	YML076C	1.13608	-0.151799
ASCIZ	YML078W	1.71907	-0.255796
ASCIZ	YML079W	2.22233	-0.187406
ASCIZ	YML080W	0.214261	-1.14689
ASCIZ	YML081W	1.36031	-0.441562
ASCIZ	YML082W	2.1725	0.139751
ASCIZ	YML083C	0.732473	-0.854836
ASCIZ	YML084W	0.657731	-0.963798
ASCIZ	YML087C	4.0859	1.93814
ASCIZ	YML088W	1.13608	-0.610411
ASCIZ	YML089C	2.38677	0.305434
ASCIZ	YML090W	0.901888	0.145299
ASCIZ	YML095C	3.64742	2.0221
ASCIZ	YML096W	1.29055	-0.135314
ASCIZ	YML099C	0.328865	-0.861018
ASCIZ	YML100W	1.0713	0.337566
ASCIZ	YML100W-A	1.5945	0.719377
ASCIZ	YML101C	1.51477	-0.949532
ASCIZ	YML103C	0.00498281	-0.898342
ASCIZ	YML104C	5.33659	2.14059
ASCIZ	YML106W	0.264089	-1.07087
ASCIZ	YML107C	0.358762	-1.26842
ASCIZ	YML108W	1.69914	1.74755
ASCIZ	YML109W	0.00498281	-1.02599
ASCIZ	YML110C	1.20584	0.729673
ASCIZ	YML111W	2.09278	0.0529499
ASCIZ	YML113W	0.254123	-0.929612
ASCIZ	YML116W	3.21889	0.882682
ASCIZ	YML117W-A	0.966665	-0.114405
ASCIZ	YML118W	0.60292	-0.258934
ASCIZ	YML119W	0.219244	-1.46404
ASCIZ	YML120C	1.04639	-0.550783
ASCIZ	YML121W	0.104639	-0.382548
ASCIZ	YML122C	1.18591	-0.414588
ASCIZ	YML123C	3.3036	1.42102
ASCIZ	YML124C	0.264089	-0.339342
ASCIZ	YML128C	0.289003	-0.590295
ASCIZ	YML129C	0.6378	-0.239222
ASCIZ	YML131W	1.46993	-0.020304
ASCIZ	YMR002W	0.513229	-0.21302
ASCIZ	YMR003W	1.07629	1.18875
ASCIZ	YMR004W	0.438487	-0.412216
ASCIZ	YMR006C	1.45498	-0.509973
ASCIZ	YMR007W	2.10773	0.141924
ASCIZ	YMR008C	0.981613	-0.405916
ASCIZ	YMR009W	0.961682	-0.503762
ASCIZ	YMR010W	1.28556	-0.0791061
ASCIZ	YMR011W	0.951717	0.219329
ASCIZ	YMR012W	0.463401	-0.901236
ASCIZ	YMR015C	1.34038	-0.0764136
ASCIZ	YMR016C	0.672679	-0.679953
ASCIZ	YMR017W	0.303951	-1.15943
ASCIZ	YMR018W	1.52474	0.458436
ASCIZ	YMR019W	1.4201	-0.118385
ASCIZ	YMR020W	1.24072	-0.31969
ASCIZ	YMR022W	2.0579	-0.404124
ASCIZ	YMR023C	0.56804	-0.256868
ASCIZ	YMR025W	0.742439	0.260085
ASCIZ	YMR026C	0.343814	-0.0968431
ASCIZ	YMR027W	1.04141	-0.270163
ASCIZ	YMR029C	0.772335	0.772096
ASCIZ	YMR030W	0.174398	-0.199601
ASCIZ	YMR031C	0.966665	0.169602
ASCIZ	YMR031W-A	0.00498281	-1.15033
ASCIZ	YMR034C	1.85859	0.103168
ASCIZ	YMR035W	0.343814	-0.529704
ASCIZ	YMR036C	0.368728	-1.00366
ASCIZ	YMR040W	1.5646	-0.0274849
ASCIZ	YMR041C	0.976631	-0.515314
ASCIZ	YMR042W	0.438487	-0.558685
ASCIZ	YMR044W	0.0747421	-0.590605
ASCIZ	YMR048W	1.11117	0.138503
ASCIZ	YMR095C	2.49639	0.858746
ASCIZ	YMR096W	0.293986	-1.34239
ASCIZ	YMR098C	0.00498281	-0.792498
ASCIZ	YMR099C	0.363745	-0.611617
ASCIZ	YMR100W	0.72749	-0.19851
ASCIZ	YMR101C	0.946734	-0.0205599
ASCIZ	YMR102C	2.81529	1.07713
ASCIZ	YMR103C	0.104639	-1.38363
ASCIZ	YMR104C	1.85859	-0.509119
ASCIZ	YMR105C	0.72749	0.0638176
ASCIZ	YMR106C	2.46649	1.12389
ASCIZ	YMR107W	0.343814	-0.948188
ASCIZ	YMR109W	0.936768	-0.994605
ASCIZ	YMR110C	1.80876	0.381817
ASCIZ	YMR111C	1.15601	-0.231368
ASCIZ	YMR114C	1.89845	0.265348
ASCIZ	YMR118C	3.83676	1.17571
ASCIZ	YMR119W-A	2.43659	0.632773
ASCIZ	YMR120C	1.20086	0.779823
ASCIZ	YMR121C	0.00498281	-0.835613
ASCIZ	YMR122C	0.717525	0.109891
ASCIZ	YMR124W	0.373711	-0.627843
ASCIZ	YMR126C	0.204295	-0.860839
ASCIZ	YMR127C	2.23728	1.20912
ASCIZ	YMR129W	3.07439	1.60147
ASCIZ	YMR130W	1.26065	0.126621
ASCIZ	YMR132C	1.25567	0.548531
ASCIZ	YMR133W	0.269072	-0.998016
ASCIZ	YMR135C	0.0398625	-1.04261
ASCIZ	YMR139W	1.13608	0.223822
ASCIZ	YMR140W	2.06288	-0.425527
ASCIZ	YMR141C	1.61443	0.160548
ASCIZ	YMR144W	2.74055	1.28432
ASCIZ	YMR145C	2.25721	-0.0123558
ASCIZ	YMR147W	4.07594	1.29241
ASCIZ	YMR148W	7.57387	2.68567
ASCIZ	YMR150C	0.498281	-0.307112
ASCIZ	YMR151W	0.0697593	-0.904126
ASCIZ	YMR152W	1.14605	0.880952
ASCIZ	YMR153C-A	2.79037	0.339925
ASCIZ	YMR153W	4.83333	2.0554
ASCIZ	YMR154C	4.24535	-0.0472395
ASCIZ	YMR155W	2.04295	-0.302199
ASCIZ	YMR156C	0.971648	1.17988
ASCIZ	YMR157C	2.38677	0.381664
ASCIZ	YMR158W	1.03144	1.2873
ASCIZ	YMR158W-A	1.68917	0.123677
ASCIZ	YMR159C	2.30206	0.190714
ASCIZ	YMR161W	1.45498	-1.18419
ASCIZ	YMR162C	1.50979	-0.094686
ASCIZ	YMR163C	4.25034	2.35339
ASCIZ	YMR164C	0.19433	-1.41405
ASCIZ	YMR166C	0.862026	-0.882964
ASCIZ	YMR167W	0.323883	-1.22245
ASCIZ	YMR169c	1.14106	-0.118506
ASCIZ	YMR170C	4.88814	-0.161178
ASCIZ	YMR171C	1.31546	-0.305299
ASCIZ	YMR172C-A	1.46495	0.273123
ASCIZ	YMR172W	4.19054	0.375022
ASCIZ	YMR173W-A	2.35687	1.41615
ASCIZ	YMR174c	1.5646	0.652583
ASCIZ	YMR175w	0.293986	-0.276566
ASCIZ	YMR176W	1.37526	-0.940324
ASCIZ	YMR177W	0.597937	-1.07059
ASCIZ	YMR178W	1.08127	-0.563054
ASCIZ	YMR180C	2.81529	0.53971
ASCIZ	YMR181C	0.279037	-0.973401
ASCIZ	YMR182C	1.85859	-0.0841954
ASCIZ	YMR183C	1.37526	-0.28901
ASCIZ	YMR184W	0.867009	-0.643898
ASCIZ	YMR186W	1.24072	0.382485
ASCIZ	YMR187C	3.40326	1.10684
ASCIZ	YMR189W	1.11615	-0.635419
ASCIZ	YMR191W	2.76048	1.81245
ASCIZ	YMR192W	2.78539	1.00466
ASCIZ	YMR195W	2.93487	1.13377
ASCIZ	YMR196W	0.737456	-0.806742
ASCIZ	YMR199W	0.612886	-0.551807
ASCIZ	YMR201C	1.89845	1.00424
ASCIZ	YMR204C	1.63934	0.161689
ASCIZ	YMR206W	1.90343	0.183316
ASCIZ	YMR209C	0.926803	-0.326195
ASCIZ	YMR210W	2.00309	-0.565548
ASCIZ	YMR214W	0.00996562	-1.29998
ASCIZ	YMR216C	0.169416	-0.7319
ASCIZ	YMR221C	1.09622	-0.415934
ASCIZ	YMR222C	1.29055	-0.140858
ASCIZ	YMR223W	0.56804	-0.723986
ASCIZ	YMR225C	2.43161	0.788582
ASCIZ	YMR226C	1.13608	0.441916
ASCIZ	YMR230W	0.523195	0.86569
ASCIZ	YMR232W	2.2622	0.453354
ASCIZ	YMR233W	2.07285	0.267575
ASCIZ	YMR234W	0.817181	-0.502817
ASCIZ	YMR237W	0.458418	0.136847
ASCIZ	YMR238W	0.632817	-0.875649
ASCIZ	YMR241W	1.29055	0.0840296
ASCIZ	YMR244C-A	0.28402	-0.59565
ASCIZ	YMR244W	1.05636	0.502508
ASCIZ	YMR245W	0.114605	-0.838298
ASCIZ	YMR246W	1.43505	0.0463386
ASCIZ	YMR247C	1.56958	0.0981462
ASCIZ	YMR251W	1.77388	0.681993
ASCIZ	YMR251W-A	0.85206	-0.0736194
ASCIZ	YMR252C	2.07783	0.637417
ASCIZ	YMR253C	1.28058	-0.0772682
ASCIZ	YMR254C	1.85361	0.391751
ASCIZ	YMR255W	0.0797249	-1.17799
ASCIZ	YMR258C	1.53969	0.607085
ASCIZ	YMR259C	2.73058	0.0216118
ASCIZ	YMR261C	0.0896906	-0.565892
ASCIZ	YMR262W	1.95326	-0.130705
ASCIZ	YMR264W	1.16598	-0.501275
ASCIZ	YMR265C	4.36992	0.873848
ASCIZ	YMR266W	0.024914	1.26948
ASCIZ	YMR271C	2.5512	-0.0942276
ASCIZ	YMR273C	2.14759	0.811123
ASCIZ	YMR274C	2.06787	-0.24246
ASCIZ	YMR275C	1.18093	1.11054
ASCIZ	YMR276W	2.29708	-0.185065
ASCIZ	YMR278W	3.18402	0.574187
ASCIZ	YMR279C	0.72749	-0.895128
ASCIZ	YMR280C	1.65928	-0.285973
ASCIZ	YMR283C	1.26065	-0.706577
ASCIZ	YMR284W	1.64931	0.370579
ASCIZ	YMR285C	3.32353	0.968307
ASCIZ	YMR286W	0.204295	0.122157
ASCIZ	YMR289W	0.413573	-0.873028
ASCIZ	YMR291W	0.787284	-0.565262
ASCIZ	YMR292W	2.62594	-0.110767
ASCIZ	YMR294W-A	1.31546	0.17839
ASCIZ	YMR295C	0.104639	-0.452718
ASCIZ	YMR299C	1.67422	1.43102
ASCIZ	YMR302C	0.832129	-0.427997
ASCIZ	YMR303C	0.702576	-0.307411
ASCIZ	YMR304C-A	2.93487	0.620733
ASCIZ	YMR304W	0.174398	-0.528645
ASCIZ	YMR305C	0.871992	-0.153447
ASCIZ	YMR306C-A	3.37336	2.01868
ASCIZ	YMR306W	2.20738	-0.259055
ASCIZ	YMR307W	0.224226	-0.324716
ASCIZ	YMR310C	0.707559	0.320692
ASCIZ	YMR311C	1.33539	-0.449853
ASCIZ	YMR313C	1.42508	0.0876817
ASCIZ	YMR315W	3.52285	0.858145
ASCIZ	YMR316C-A	2.0878	1.53033
ASCIZ	YMR316C-B	2.2024	0.832435
ASCIZ	YMR316W	3.58762	1.80166
ASCIZ	YMR317W	2.41666	-0.0491955
ASCIZ	YMR318C	5.42628	1.43712
ASCIZ	YMR319C	0.891923	-0.795618
ASCIZ	YMR320W	2.17749	-0.525465
ASCIZ	YNL051W	1.36529	0.884967
ASCIZ	YNL052W	1.64433	-0.21381
ASCIZ	YNL054W	0.184364	-0.965547
ASCIZ	YNL056W	2.47147	-0.844926
ASCIZ	YNL057W	2.25721	0.118464
ASCIZ	YNL058C	1.15103	0.535111
ASCIZ	YNL062C	0.00498281	#DIV/0!
ASCIZ	YNL063W	3.35841	-0.389009
ASCIZ	YNL065W	4.01614	0.979602
ASCIZ	YNL066W	3.53779	0.282332
ASCIZ	YNL067W	0.597937	0.86256
ASCIZ	YNL068C	1.17096	-0.166449
ASCIZ	YNL072W	2.92491	0.976179
ASCIZ	YNL074C	3.93642	0.539303
ASCIZ	YNL076W	1.20086	-0.797659
ASCIZ	YNL078W	4.18556	1.09942
ASCIZ	YNL082W	3.26374	2.17474
ASCIZ	YNL083W	0.488315	-0.760778
ASCIZ	YNL085W	3.94638	1.20019
ASCIZ	YNL087W	4.34501	0.532126
ASCIZ	YNL090W	1.26563	-0.303409
ASCIZ	YNL092W	5.02765	1.42648
ASCIZ	YNL093W	2.11769	1.75977
ASCIZ	YNL094W	0.981613	-0.759781
ASCIZ	YNL095C	3.99123	1.60715
ASCIZ	YNL098C	2.59106	2.87391
ASCIZ	YNL099C	2.00309	-0.653722
ASCIZ	YNL100W	1.92835	0.1085
ASCIZ	YNL101W	2.49639	0.579202
ASCIZ	YNL104C	1.27062	-0.54188
ASCIZ	YNL105W	1.83367	-0.171973
ASCIZ	YNL106C	1.12611	-0.335296
ASCIZ	YNL108C	0.827146	-0.61273
ASCIZ	YNL115C	0.00996562	-1.01321
ASCIZ	YNL116W	1.41512	0.180731
ASCIZ	YNL117W	0.104639	0.199612
ASCIZ	YNL120C	0.199312	-0.122673
ASCIZ	YNL121C	0.3189	0.286842
ASCIZ	YNL122C	1.69416	0.00312933
ASCIZ	YNL123W	2.028	1.47632
ASCIZ	YNL125C	2.14261	0.0223977
ASCIZ	YNL127W	2.52628	1.69749
ASCIZ	YNL128W	1.34038	-0.271769
ASCIZ	YNL129W	2.54123	-0.159932
ASCIZ	YNL130C	1.77886	0.00241468
ASCIZ	YNL134C	2.82027	1.00572
ASCIZ	YNL135C	0.88694	0.987253
ASCIZ	YNL136W	0.24914	-0.247662
ASCIZ	YNL140C	0.657731	0.0111866
ASCIZ	YNL141W	2.53625	0.388436
ASCIZ	YNL142W	0.901888	1.52911
ASCIZ	YNL143C	3.37834	0.613431
ASCIZ	YNL144C	1.14106	-0.696444
ASCIZ	YNL145W	1.97319	-0.793396
ASCIZ	YNL146W	1.80876	-0.633629
ASCIZ	YNL148C	0.119587	-0.300807
ASCIZ	YNL154C	1.10618	0.577006
ASCIZ	YNL157W	0.69261	0.33302
ASCIZ	YNL159C	1.09622	-0.421483
ASCIZ	YNL160W	0.597937	0.16355
ASCIZ	YNL168C	1.12611	0.209268
ASCIZ	YNL172W	0.269072	0.311653
ASCIZ	YNL173C	0.40859	-0.578925
ASCIZ	YNL175C	0.293986	-0.19538
ASCIZ	YNL176C	0.139519	-0.8322
ASCIZ	YNL179C	0.423539	-0.183532
ASCIZ	YNL183C	1.19089	-0.265784
ASCIZ	YNL187W	0.239175	-0.260605
ASCIZ	YNL190W	1.08625	-0.134556
ASCIZ	YNL191W	2.7256	3.04828
ASCIZ	YNL193W	0.792267	-0.325839
ASCIZ	YNL194C	1.61941	0.261135
ASCIZ	YNL195C	1.14605	-0.607884
ASCIZ	YNL198C	1.22577	0.427992
ASCIZ	YNL200C	3.61752	1.51796
ASCIZ	YNL201C	1.81873	1.43356
ASCIZ	YNL202W	0.951717	-0.672687
ASCIZ	YNL204C	0.722507	0.453122
ASCIZ	YNL212W	0.109622	-0.730452
ASCIZ	YNL214W	1.47989	0.0490674
ASCIZ	YNL217W	0.936768	-0.312536
ASCIZ	YNL219C	0.528178	-0.522111
ASCIZ	YNL224C	0.343814	-0.230154
ASCIZ	YNL230C	0.428522	-0.167816
ASCIZ	YNL231C	0.508247	-0.52896
ASCIZ	YNL233W	0.578006	-0.319002
ASCIZ	YNL235C	0.373711	-0.450319
ASCIZ	YNL237W	0.12457	-0.276968
ASCIZ	YNL239W	0.632817	-0.622172
ASCIZ	YNL242W	0.373711	-0.642384
ASCIZ	YNL249C	2.97474	1.18992
ASCIZ	YNL252C	1.60446	1.47115
ASCIZ	YNL253W	0.717525	-0.522971
ASCIZ	YNL254C	0.298969	-1.00565
ASCIZ	YNL255C	3.54776	1.1546
ASCIZ	YNL257C	1.22079	-1.02698
ASCIZ	YNL259C	0.47835	-0.648803
ASCIZ	YNL264C	0.617868	-0.185655
ASCIZ	YNL265C	1.5646	1.42886
ASCIZ	YNL266W	1.08625	-0.600476
ASCIZ	YNL269W	1.16099	-0.37368
ASCIZ	YNL270C	0.662714	-0.509707
ASCIZ	YNL271C	0.378694	0.53472
ASCIZ	YNL274C	4.58418	-0.00660141
ASCIZ	YNL275W	0.847078	-0.77796
ASCIZ	YNL278W	0.657731	0.332591
ASCIZ	YNL279W	3.66735	0.14217
ASCIZ	YNL281W	1.92336	1.29382
ASCIZ	YNL283C	0.468384	-0.470263
ASCIZ	YNL285W	0.69261	0.0386408
ASCIZ	YNL286W	0.289003	-0.423793
ASCIZ	YNL288W	1.16099	-0.474109
ASCIZ	YNL289W	0.822164	-0.48155
ASCIZ	YNL291C	0.617868	-0.283495
ASCIZ	YNL292W	0.56804	-0.461718
ASCIZ	YNL293W	0.533161	-0.703771
ASCIZ	YNL294C	1.23075	-1.02692
ASCIZ	YNL295W	2.44158	0.594467
ASCIZ	YNL299W	0.209278	-0.35111
ASCIZ	YNL300W	1.31048	0.243839
ASCIZ	YNL301C	1.35532	-0.220047
ASCIZ	YNL303W	0.777318	-0.508975
ASCIZ	YNL304W	2.72061	0.626
ASCIZ	YNL305C	1.05137	-0.491217
ASCIZ	YNL311C	2.39673	0.0803773
ASCIZ	YNL314W	0.433504	-0.603134
ASCIZ	YNL316C	1.90343	0.0992882
ASCIZ	YNL318C	2.18745	0.459879
ASCIZ	YNL319W	0.528178	-0.934326
ASCIZ	YNL321W	3.66735	0.313067
ASCIZ	YNL322C	0.44347	-0.71856
ASCIZ	YNL324W	0.493298	0.318371
ASCIZ	YNL325C	0.254123	-0.686919
ASCIZ	YNL326C	1.18093	-0.543401
ASCIZ	YNL327W	1.29055	-0.415587
ASCIZ	YNL329C	1.75395	0.199132
ASCIZ	YNL333W	1.11615	-0.417422
ASCIZ	YNL334C	1.09124	0.432959
ASCIZ	YNL335W	3.43316	1.89761
ASCIZ	YNL336W	4.0859	0.787282
ASCIZ	YNL338W	0.85206	-0.119752
ASCIZ	YNL339C	1.06134	-1.01943
ASCIZ	YOL002C	1.92336	2.27662
ASCIZ	YOL003C	0.702576	-0.174112
ASCIZ	YOL007C	0.15945	-0.988818
ASCIZ	YOL011W	0.199312	-1.06171
ASCIZ	YOL013C	1.36031	-0.303698
ASCIZ	YOL014W	1.49484	-0.200391
ASCIZ	YOL015W	0.139519	-0.990347
ASCIZ	YOL016C	2.62096	0.682252
ASCIZ	YOL019W	0.946734	0.191905
ASCIZ	YOL020W	0.473367	1.46195
ASCIZ	YOL025W	0.672679	-0.00530218
ASCIZ	YOL029C	0.85206	0.703277
ASCIZ	YOL030W	0.463401	-1.01157
ASCIZ	YOL031C	1.18093	-0.204676
ASCIZ	YOL032W	0.293986	-1.03963
ASCIZ	YOL035C	0.338831	-0.914434
ASCIZ	YOL036W	1.14605	0.104929
ASCIZ	YOL037C	0.184364	-1.17281
ASCIZ	YOL042W	0.3189	-0.561903
ASCIZ	YOL043C	1.98814	1.5413
ASCIZ	YOL045W	1.7689	0.9629
ASCIZ	YOL046C	2.82525	0.91209
ASCIZ	YOL047C	2.19742	1.28966
ASCIZ	YOL048C	0.587971	-0.0623494
ASCIZ	YOL052C	0.289003	-0.508189
ASCIZ	YOL053C-A	0.891923	0.193532
ASCIZ	YOL053W	0.607903	-0.500598
ASCIZ	YOL056W	0.677662	-0.265569
ASCIZ	YOL057W	0.563057	-0.790262
ASCIZ	YOL058W	0.971648	-0.838721
ASCIZ	YOL059W	1.08127	0.00999976
ASCIZ	YOL060C	0.0697593	-0.933547
ASCIZ	YOL061W	0.657731	-0.69613
ASCIZ	YOL062C	1.71409	0.61984
ASCIZ	YOL063C	1.96323	1.82183
ASCIZ	YOL065C	1.52972	-0.116062
ASCIZ	YOL068C	0.164433	-1.03708
ASCIZ	YOL070C	1.30051	0.460002
ASCIZ	YOL071W	1.87354	0.392443
ASCIZ	YOL075C	1.1311	-0.158406
ASCIZ	YOL079W	0.901888	-0.294296
ASCIZ	YOL080C	0.857043	0.395365
ASCIZ	YOL082W	0.722507	-0.364199
ASCIZ	YOL083W	0.538143	-0.0275001
ASCIZ	YOL084W	3.27371	1.18081
ASCIZ	YOL085C	1.66426	-0.5171
ASCIZ	YOR002W	1.86855	0.848221
ASCIZ	YOR003W	2.09278	0.241896
ASCIZ	YOR005C	1.42508	-0.732129
ASCIZ	YOR006C	0.00996562	-0.88938
ASCIZ	YOR007C	1.31546	-0.674503
ASCIZ	YOR009W	2.17749	0.349475
ASCIZ	YOR010C	5.02267	0.828153
ASCIZ	YOR011W	2.89003	0.188531
ASCIZ	YOR012W	3.39329	0.102627
ASCIZ	YOR013W	1.45	-0.0447145
ASCIZ	YOR015W	2.57611	0.256402
ASCIZ	YOR016C	0.732473	-0.578334
ASCIZ	YOR017W	0.56804	-0.539516
ASCIZ	YOR018W	0.677662	-0.411295
ASCIZ	YOR019W	0.498281	0.559413
ASCIZ	YOR021C	2.62594	1.20068
ASCIZ	YOR022C	5.05755	2.02088
ASCIZ	YOR023C	2.35189	0.69276
ASCIZ	YOR024W	0.667696	-0.631275
ASCIZ	YOR025W	0.862026	-0.456955
ASCIZ	YOR027W	0.298969	-0.943614
ASCIZ	YOR028C	0.996562	-0.786827
ASCIZ	YOR029W	1.88848	-0.0379099
ASCIZ	YOR030W	2.33694	0.777314
ASCIZ	YOR031W	0.662714	-0.55291
ASCIZ	YOR032C	2.83024	1.4994
ASCIZ	YOR033C	0.44347	0.047331
ASCIZ	YOR034C	1.05636	0.256157
ASCIZ	YOR037W	1.08625	-0.778771
ASCIZ	YOR038C	0.189347	-0.669301
ASCIZ	YOR039W	0.697593	1.36811
ASCIZ	YOR040W	1.94828	0.0251218
ASCIZ	YOR041C	1.01151	0.367003
ASCIZ	YOR042W	0.961682	-0.305009
ASCIZ	YOR043W	1.02646	-0.609147
ASCIZ	YOR044W	0.224226	-0.849758
ASCIZ	YOR045W	0.747421	-0.471526
ASCIZ	YOR047C	0.592954	-0.669766
ASCIZ	YOR049C	0.553092	-0.499926
ASCIZ	YOR050C	0.00498281	-1.32845
ASCIZ	YOR051C	0.139519	-0.702006
ASCIZ	YOR052C	2.46151	0.568371
ASCIZ	YOR053W	1.09622	-0.529193
ASCIZ	YOR054C	1.01151	0.126511
ASCIZ	YOR055W	2.16752	0.39536
ASCIZ	YOR058C	3.87164	2.45223
ASCIZ	YOR059C	2.75051	-0.656985
ASCIZ	YOR061W	3.92645	1.52449
ASCIZ	YOR062C	2.91494	0.983436
ASCIZ	YOR064C	0.936768	-0.177334
ASCIZ	YOR066W	0.802232	0.829602
ASCIZ	YOR067C	0.488315	-0.987309
ASCIZ	YOR068C	2.29209	-0.546263
ASCIZ	YOR069W	1.17594	-0.538437
ASCIZ	YOR070C	1.99811	1.30842
ASCIZ	YOR071C	2.51632	1.05759
ASCIZ	YOR072W	2.33195	0.782343
ASCIZ	YOR076C	0.144501	-0.589005
ASCIZ	YOR079C	1.02148	-0.290798
ASCIZ	YOR081C	2.31701	1.53711
ASCIZ	YOR082C	2.8402	1.29958
ASCIZ	YOR083W	1.12113	-1.23189
ASCIZ	YOR084W	2.88505	0.553482
ASCIZ	YOR086C	0.303951	-0.319908
ASCIZ	YOR087W	1.12113	0.380797
ASCIZ	YOR088W	0.72749	-0.0840165
ASCIZ	YOR090C	1.8835	-0.672043
ASCIZ	YOR091W	0.418556	-0.520438
ASCIZ	YOR092W	0.363745	-0.846428
ASCIZ	YOR093C	1.28556	-0.449203
ASCIZ	YOR094W	2.64587	2.06192
ASCIZ	YOR097C	0.289003	-0.625358
ASCIZ	YOR099W	0.543126	0.10497
ASCIZ	YOR100C	1.65928	1.59823
ASCIZ	YOR101W	0.697593	-0.0366461
ASCIZ	YOR105W	0.682645	-0.0896025
ASCIZ	YOR107W	0.911854	-0.250158
ASCIZ	YOR108W	0.00996562	-1.04979
ASCIZ	YOR111W	2.77044	1.54003
ASCIZ	YOR112W	1.52972	1.71634
ASCIZ	YOR114W	0.687628	-0.454786
ASCIZ	YOR115C	0.24914	-0.760625
ASCIZ	YOR118W	1.27062	-0.189932
ASCIZ	YOR120W	0.3189	-0.0447503
ASCIZ	YOR121C	0.358762	0.284534
ASCIZ	YOR124C	2.0878	1.9674
ASCIZ	YOR125C	1.98814	0.377449
ASCIZ	YOR126C	2.80034	0.27018
ASCIZ	YOR129C	0.558075	0.222692
ASCIZ	YOR130C	1.11615	1.06141
ASCIZ	YOR131C	0.458418	-0.404888
ASCIZ	YOR132W	1.22577	0.780162
ASCIZ	YOR134W	0.40859	0.173796
ASCIZ	YOR135C	0.264089	0.199452
ASCIZ	YOR137C	0.229209	-0.228814
ASCIZ	YOR138C	0.0498281	-0.654112
ASCIZ	YOR139C	0.214261	-0.375084
ASCIZ	YOR140W	1.04639	-0.384042
ASCIZ	YOR142W	1.99312	0.259936
ASCIZ	YOR144C	0.617868	0.155903
ASCIZ	YOR150W	0.553092	0.182069
ASCIZ	YOR152C	4.36494	-0.771711
ASCIZ	YOR153W	0.607903	-0.570252
[truncated: 291 more rows]

## Sheet: AURKB
Table S2. Barcode counts of yeast deletion strains obtained from high-throughput sequencing.
Query (Kinase)	Subject (yeast gene deletion)	Normalized barcode counts	Z-score
AURKB	YAL002W	0.135202	-0.872827
AURKB	YAL004W	0.71761	-0.525106
AURKB	YAL005C	0.975014	-0.788023
AURKB	YAL007C	1.24282	0.921824
AURKB	YAL008W	0.486207	0.0858286
AURKB	YAL012W	0.608409	-1.55394
AURKB	YAL014C	0.117002	-1.26922
AURKB	YAL015C	4.94527	3.31533
AURKB	YAL017W	0.00260004	-1.16359
AURKB	YAL018C	1.02181	0.276218
AURKB	YAL019W	2.40763	2.11072
AURKB	YAL021C	0.977614	2.61712
AURKB	YAL022C	0.00520007	-1.63522
AURKB	YAL027W	1.60422	0.752908
AURKB	YAL028W	0.332805	-0.715732
AURKB	YAL029C	0.104001	-1.01072
AURKB	YAL030W	2.55844	1.78767
AURKB	YAL031C	1.19342	1.01846
AURKB	YAL034C	1.17262	0.338392
AURKB	YAL036C	0.0234003	-1.65821
AURKB	YAL042W	2.10863	2.08054
AURKB	YAL043C-	0.122202	-0.814965
AURKB	YAL046C	0.104001	-1.10759
AURKB	YAL048C	0.161202	-0.870297
AURKB	YAL049C	0.0182003	-1.08535
AURKB	YAL051W	0.514807	-0.693312
AURKB	YAL053W	2.66504	1.7205
AURKB	YAL055W	0.668209	-0.564486
AURKB	YAL056W	3.29945	3.47783
AURKB	YAL058W	0.878812	0.378105
AURKB	YAL059W	0.00260004	-0.914789
AURKB	YAL060W	1.00621	-0.13721
AURKB	YAL061W	0.0312004	-1.15638
AURKB	YAL062W	2.35823	0.710564
AURKB	YAL065C	0.878812	-0.0502357
AURKB	YAL067C	0.806011	-0.414812
AURKB	YAL068C	1.47942	-0.470163
AURKB	YAR003W	0.933413	1.45483
AURKB	YAR014C	0.374405	0.15418
AURKB	YAR018C	2.98484	3.43333
AURKB	YAR020C	0.431606	-0.833279
AURKB	YAR023C	0.761811	0.457019
AURKB	YAR027W	0.0806011	-1.16549
AURKB	YAR029W	0.660409	-0.907806
AURKB	YAR030C	0.00260004	-1.22349
AURKB	YAR031W	0.777411	-0.429153
AURKB	YAR035W	0.00260004	-1.2703
AURKB	YAR037W	1.15442	0.23075
AURKB	YAR040C	0.273004	-1.01989
AURKB	YAR042W	1.71602	1.34929
AURKB	YAR047C	1.38062	0.681173
AURKB	YBL002W	1.24282	2.08981
AURKB	YBL003C	0.00520007	-0.828607
AURKB	YBL005W	0.452406	-0.733749
AURKB	YBL009W	1.74462	2.38563
AURKB	YBL010C	2.40243	1.97955
AURKB	YBL011W	0.410806	-0.857312
AURKB	YBL012C	0.301604	-0.917163
AURKB	YBL013W	0.179403	-1.32307
AURKB	YBL015W	1.53142	0.518996
AURKB	YBL017C	0.174202	-0.512404
AURKB	YBL019W	1.65622	1.74829
AURKB	YBL028C	0.496607	0.254375
AURKB	YBL029W	0.148202	-0.526984
AURKB	YBL031W	0.104001	-0.334621
AURKB	YBL032W	0.239203	0.311661
AURKB	YBL036C	0.00260004	-0.948363
AURKB	YBL037W	0.936013	0.882194
AURKB	YBL043W	0.122202	-0.75867
AURKB	YBL045C	0.338005	-1.00016
AURKB	YBL046W	0.205403	-0.0862401
AURKB	YBL049W	1.76022	0.285294
AURKB	YBL052C	2.76384	4.04001
AURKB	YBL053W	0.00260004	-1.27725
AURKB	YBL054W	0.106601	-1.08559
AURKB	YBL055C	1.28442	1.27253
AURKB	YBL056W	0.163802	-1.02775
AURKB	YBL057C	0.535607	-0.566538
AURKB	YBL059W	0.195003	-1.09036
AURKB	YBL060W	1.27402	1.94524
AURKB	YBL061C	1.51062	0.700895
AURKB	YBL062W	2.44403	2.62643
AURKB	YBL063W	1.32342	0.451157
AURKB	YBL064C	2.44923	1.80967
AURKB	YBL065W	0.0104001	-0.840195
AURKB	YBL066C	0.842412	-0.852987
AURKB	YBL067C	3.37225	2.69228
AURKB	YBL068W	1.08942	-0.330846
AURKB	YBL069W	0.158602	-0.974732
AURKB	YBL070C	2.00983	0.488454
AURKB	YBL075C	0.361405	-0.863095
AURKB	YBL078C	0.364005	-1.16014
AURKB	YBL079W	0.457606	0.910093
AURKB	YBL080C	0.982814	0.3052
AURKB	YBL081W	0.306804	-0.6502
AURKB	YBL082C	0.460206	-0.258426
AURKB	YBL083C	0.00260004	-0.813165
AURKB	YBL085W	1.21162	0.148803
AURKB	YBL086C	1.77582	0.394032
AURKB	YBL089W	0.421206	-0.572625
AURKB	YBL091C	0.182003	-1.17266
AURKB	YBL094C	1.09462	0.596808
AURKB	YBL095W	6.38309	3.13773
AURKB	YBL096C	1.36502	-0.095226
AURKB	YBL098W	2.29843	0.838197
AURKB	YBL099W	0.943813	2.13948
AURKB	YBL101C	6.8043	-0.418396
AURKB	YBL102W	2.26723	0.752308
AURKB	YBL104C	3.07584	3.52761
AURKB	YBL106C	0.358805	-0.377951
AURKB	YBL107C	1.72902	-0.213427
AURKB	YBR001C	0.637009	-1.22909
AURKB	YBR005W	0.338005	-1.24924
AURKB	YBR006W	1.21682	1.68664
AURKB	YBR007C	0.358805	-1.47673
AURKB	YBR009C	0.187203	-0.367892
AURKB	YBR010W	0.850212	-0.127444
AURKB	YBR012C	1.27142	-0.391089
AURKB	YBR014C	2.09563	0.66041
AURKB	YBR015C	0.221003	-0.46604
AURKB	YBR016W	0.169002	-1.47098
AURKB	YBR018C	3.22145	0.881737
AURKB	YBR019C	0.964614	1.42634
AURKB	YBR020W	2.89904	1.82016
AURKB	YBR022W	5.42888	2.97535
AURKB	YBR023C	0.00520007	-1.18607
AURKB	YBR024W	0.148202	-1.42584
AURKB	YBR027C	0.00260004	-1.38766
AURKB	YBR028C	1.64582	1.79451
AURKB	YBR030W	1.67182	2.89654
AURKB	YBR032W	0.0546008	-1.26633
AURKB	YBR033W	0.980214	-0.248245
AURKB	YBR034C	1.49502	-0.0926454
AURKB	YBR040W	0.270404	-0.65731
AURKB	YBR041W	0.161202	-0.586198
AURKB	YBR043C	0.143002	-1.08732
AURKB	YBR045C	1.74462	-0.142902
AURKB	YBR046C	0.551208	-1.39009
AURKB	YBR047W	1.08682	-0.327327
AURKB	YBR050C	1.71342	-1.34531
AURKB	YBR051W	3.34885	1.30736
AURKB	YBR054W	1.19602	-0.00406715
AURKB	YBR056W	0.366605	-0.418233
AURKB	YBR057C	1.77842	0.202443
AURKB	YBR058C	1.48462	0.425949
AURKB	YBR059C	3.08884	0.403806
AURKB	YBR062C	1.46122	0.259797
AURKB	YBR063C	2.08523	0.825808
AURKB	YBR064W	2.15283	-0.153714
AURKB	YBR065C	2.64684	1.30269
AURKB	YBR066C	1.85383	0.0173705
AURKB	YBR067C	0.163802	-0.971539
AURKB	YBR068C	1.45342	-0.121088
AURKB	YBR071W	2.23083	0.673418
AURKB	YBR072W	2.80284	1.24736
AURKB	YBR074W	5.41588	2.68336
AURKB	YBR075W	0.819011	-0.439416
AURKB	YBR083W	0.494007	-0.844225
AURKB	YBR084W	1.91883	0.328779
AURKB	YBR090C-A	2.00723	1.71696
AURKB	YBR092C	1.76802	1.40291
AURKB	YBR093C	0.166402	-1.12575
AURKB	YBR099C	0.0156002	-1.14121
AURKB	YBR101C	0.127402	-1.10323
AURKB	YBR103W	0.00260004	-0.812739
AURKB	YBR104W	1.06601	-0.0905341
AURKB	YBR105C	1.96043	1.67689
AURKB	YBR108W	0.00780011	-0.440286
AURKB	YBR113W	0.00260004	-1.24055
AURKB	YBR116C	0.613609	0.0188136
AURKB	YBR120C	2.19183	0.782818
AURKB	YBR128C	2.04883	1.50559
AURKB	YBR130C	0.0364005	-1.20963
AURKB	YBR134W	0.366605	0.786138
AURKB	YBR137W	0.228803	-1.12544
AURKB	YBR138C	0.0130002	-1.89883
AURKB	YBR139W	0.208003	-1.44357
AURKB	YBR141C	2.37643	1.11978
AURKB	YBR144C	0.101401	-0.932932
AURKB	YBR145W	0.00520007	-1.32806
AURKB	YBR146W	0.00260004	-0.526824
AURKB	YBR147W	3.57505	0.800342
AURKB	YBR150C	0.153402	-0.982534
AURKB	YBR157C	2.38163	3.1324
AURKB	YBR162W-A	1.71602	1.11551
AURKB	YBR163W	1.21422	0.191793
AURKB	YBR164C	0.868412	0.0956175
AURKB	YBR169C	0.860612	-0.927996
AURKB	YBR170C	0.0910013	-1.13804
AURKB	YBR172C	1.02441	-0.311483
AURKB	YBR174C	1.11282	2.74345
AURKB	YBR176W	0.124802	-0.883086
AURKB	YBR177C	0.374405	-0.648491
AURKB	YBR180W	1.46642	2.2733
AURKB	YBR182C	2.44923	4.26838
AURKB	YBR183W	1.11282	-0.0828453
AURKB	YBR184W	0.0546008	-1.61296
AURKB	YBR185C	2.18403	0.615768
AURKB	YBR186W	0.174202	-0.899425
AURKB	YBR188C	0.176802	-0.773823
AURKB	YBR197C	0.179403	-0.944331
AURKB	YBR199W	0.340605	-1.00321
AURKB	YBR203W	1.59642	0.658324
AURKB	YBR204C	0.00260004	-1.52375
AURKB	YBR205W	2.46483	0.548509
AURKB	YBR206W	3.08104	1.2143
AURKB	YBR207W	0.072801	-1.23771
AURKB	YBR208C	0.910013	-0.0627402
AURKB	YBR212W	1.74202	0.803024
AURKB	YBR214W	0.00520007	-1.29121
AURKB	YBR215W	0.189803	-0.399569
AURKB	YBR216C	0.00520007	-1.53679
AURKB	YBR217W	0.0468007	-1.46848
AURKB	YBR218C	0.413406	-1.16615
AURKB	YBR219C	0.111802	-1.14823
AURKB	YBR220C	0.785211	-1.02063
AURKB	YBR223C	0.71241	-0.188138
AURKB	YBR224W	1.69522	0.523931
AURKB	YBR225W	0.00260004	-1.51661
AURKB	YBR226C	1.73162	-0.148132
AURKB	YBR227C	1.41182	-0.244139
AURKB	YBR228W	0.127402	-1.80638
AURKB	YBR229C	2.09303	-0.245908
AURKB	YBR230C	3.46325	0.506051
AURKB	YBR231C	0.561608	-0.125118
AURKB	YBR232C	1.66922	-0.129991
AURKB	YBR233W	1.70042	1.29648
AURKB	YBR238C	0.00780011	-1.61989
AURKB	YBR239C	1.13882	-0.402531
AURKB	YBR240C	2.27503	0.549876
AURKB	YBR244W	3.54385	-1.06473
AURKB	YBR245C	2.40763	0.904806
AURKB	YBR246W	0.189803	-1.42254
AURKB	YBR248C	0.184603	-1.14619
AURKB	YBR250W	1.99423	0.0861513
AURKB	YBR251W	1.91363	1.93449
AURKB	YBR255W	0.00260004	-1.45443
AURKB	YBR258C	1.36502	0.0716785
AURKB	YBR259W	0.0780011	-1.77542
AURKB	YBR260C	1.88243	0.561596
AURKB	YBR261C	0.166402	-1.32651
AURKB	YBR262C	1.28702	-0.392887
AURKB	YBR263W	3.59065	1.89085
AURKB	YBR264C	1.71862	0.559766
AURKB	YCL001W	0.213203	-0.795371
AURKB	YCL005W	0.0910013	-0.743879
AURKB	YCL006C	4.05866	0.389231
AURKB	YCL008C	0.491407	-0.29385
AURKB	YCL009C	0.00260004	-1.00523
AURKB	YCL010C	0.241803	-0.269937
AURKB	YCL011C	0.73841	0.22927
AURKB	YCL012W	2.49603	0.922272
AURKB	YCL013W	1.35202	0.708724
AURKB	YCL022C	0.280804	-0.820563
AURKB	YCL023C	8.08871	1.23533
AURKB	YCL024W	0.462806	-0.188235
AURKB	YCL026C	0.00260004	-1.09662
AURKB	YCL027W	1.59642	2.08473
AURKB	YCL028W	0.156002	-0.71311
AURKB	YCL030C	0.0260004	-0.645359
AURKB	YCL033C	1.29222	0.609064
AURKB	YCL035C	0.070201	-0.885375
AURKB	YCL036W	1.59902	2.87714
AURKB	YCL037C	0.0208003	-0.884196
AURKB	YCL038C	0.839812	-0.980708
AURKB	YCL039W	0.897013	0.371171
AURKB	YCL044C	0.244403	-0.791162
AURKB	YCL045C	0.00260004	-1.43282
AURKB	YCL048W	0.00260004	-0.780405
AURKB	YCL049C	0.104001	-1.04543
AURKB	YCL050C	1.10502	0.968972
AURKB	YCL056C	0.572008	-0.193478
AURKB	YCL057W	0.00260004	-1.17704
AURKB	YCL060C	0.421206	1.48764
AURKB	YCL062W	0.0962013	-1.02428
AURKB	YCL064C	0.71501	0.145433
AURKB	YCL073C	3.08104	1.28944
AURKB	YCL074W	2.01243	-0.870933
AURKB	YCL075W	7.51411	1.05871
AURKB	YCL076W	4.10806	0.665962
AURKB	YCR001W	0.0650009	-0.500906
AURKB	YCR004C	0.00260004	-1.64527
AURKB	YCR006C	0.00260004	-1.31758
AURKB	YCR007C	0.0962013	-0.705353
AURKB	YCR008W	2.30883	1.98285
AURKB	YCR010C	0.101401	-1.313
AURKB	YCR011C	1.67182	2.23074
AURKB	YCR016W	0.847612	0.670952
AURKB	YCR018C	1.85903	-0.215512
AURKB	YCR019W	0.390005	-0.784005
AURKB	YCR020C	1.57562	3.46996
AURKB	YCR020C-A	0.00520007	-1.08965
AURKB	YCR021C	1.30522	0.00632826
AURKB	YCR022C	0.00260004	-1.18533
AURKB	YCR023C	1.54962	1.20015
AURKB	YDL001W	0.166402	-0.297172
AURKB	YDL009C	1.41182	1.25366
AURKB	YDL010W	0.533007	0.293204
AURKB	YDL011C	0.187203	-0.861647
AURKB	YDL012C	0.00260004	-1.22909
AURKB	YDL018C	0.109202	-1.08066
AURKB	YDL019C	0.819011	0.600162
AURKB	YDL023C	0.486207	-0.271002
AURKB	YDL024C	2.07223	1.3582
AURKB	YDL025C	0.189803	-0.284663
AURKB	YDL026W	0.00260004	-1.59296
AURKB	YDL027C	0.00260004	-1.12205
AURKB	YDL033C	0.254804	0.111321
AURKB	YDL034W	2.87304	2.15201
AURKB	YDL036C	0.00260004	-1.30932
AURKB	YDL037C	0.00260004	-0.825388
AURKB	YDL038C	0.00260004	-1.26255
AURKB	YDL039C	0.345805	-1.17135
AURKB	YDL046W	0.140402	-0.641404
AURKB	YDL048C	0.00260004	-1.07302
AURKB	YDL049C	0.889212	0.0585003
AURKB	YDL051W	0.73321	0.23647
AURKB	YDL053C	0.587608	-0.236819
AURKB	YDL059C	0.0884012	-0.267441
AURKB	YDL062W	0.72801	2.65039
AURKB	YDL065C	1.34422	1.06723
AURKB	YDL066W	0.0156002	-0.66259
AURKB	YDL069C	0.00520007	-1.34871
AURKB	YDL071C	0.00260004	-0.849696
AURKB	YDL074C	1.21422	2.47851
AURKB	YDL076C	0.226203	-0.552935
AURKB	YDL077C	0.00260004	-0.742329
AURKB	YDL078C	0.241803	-0.901481
AURKB	YDL079C	0.603208	-0.592
AURKB	YDL085W	0.148202	-0.702961
AURKB	YDL086W	1.24542	0.622836
AURKB	YDL089W	1.32082	2.09569
AURKB	YDL091C	0.070201	-0.735716
AURKB	YDL093W	0.143002	-1.00607
AURKB	YDL094C	0.150802	-0.772942
AURKB	YDL095W	0.0910013	-1.01779
AURKB	YDL099W	1.26362	1.78578
AURKB	YDL104C	0.618809	-0.455307
AURKB	YDL107W	0.423806	1.23969
AURKB	YDL110C	2.36083	0.375422
AURKB	YDL112W	2.37383	0.240223
AURKB	YDL113C	0.871012	-1.34051
AURKB	YDL114W	2.49343	0.402659
AURKB	YDL118W	0.72801	-0.302996
AURKB	YDL121C	4.21986	2.68576
AURKB	YDL123W	3.90785	1.67902
AURKB	YDL124W	1.59382	0.945944
AURKB	YDL125C	0.603208	0.0498444
AURKB	YDL127W	1.15962	1.09442
AURKB	YDL129W	2.61044	0.606372
AURKB	YDL131W	1.05301	-0.203383
AURKB	YDL133W	3.50745	3.83831
AURKB	YDL134C-A	0.410806	-1.32406
AURKB	YDL135C	0.286004	-1.0976
AURKB	YDL136W	0.218403	-0.771211
AURKB	YDL137W	1.90063	-1.14271
AURKB	YDL138W	2.31663	-1.18464
AURKB	YDL142C	4.94787	1.46264
AURKB	YDL146W	0.553808	-0.59575
AURKB	YDL149W	2.23603	-0.0716076
AURKB	YDL154W	7.2333	-0.234322
AURKB	YDL155W	4.65147	-0.17863
AURKB	YDL156W	3.89225	-1.22885
AURKB	YDL157C	2.47783	-0.483089
AURKB	YDL161W	2.96404	-0.738307
AURKB	YDL162C	0.244403	-0.682669
AURKB	YDL167C	2.03843	-0.933512
AURKB	YDL168W	4.55786	0.583828
AURKB	YDL169C	2.78724	-0.386258
AURKB	YDL170W	4.54486	0.0580374
AURKB	YDL171C	5.12207	0.459923
AURKB	YDL172C	0.101401	-1.02355
AURKB	YDL173W	0.676009	-0.083724
AURKB	YDL174C	3.81945	-0.839592
AURKB	YDL176W	13.6502	0.947786
AURKB	YDL177C	7.91711	0.461118
AURKB	YDL178W	5.41068	0.937786
AURKB	YDL179W	2.47783	-0.490234
AURKB	YDL180W	9.48753	0.363856
AURKB	YDL182W	3.94426	-0.697465
AURKB	YDL183C	2.30103	1.07902
AURKB	YDL184C	3.28385	-0.828318
AURKB	YDL186W	2.92504	-0.695514
AURKB	YDL187C	4.75807	-0.0213048
AURKB	YDL188C	1.95523	-0.345609
AURKB	YDL189W	1.68482	-1.57601
AURKB	YDL190C	2.12943	-0.103291
AURKB	YDL197C	0.127402	-1.50423
AURKB	YDL199C	5.40808	2.51984
AURKB	YDL200C	0.876212	-0.733182
AURKB	YDL201W	7.0409	3.4189
AURKB	YDL203C	2.76384	-0.215802
AURKB	YDL204W	4.95047	1.10179
AURKB	YDL206W	2.00983	-0.607394
AURKB	YDL210W	1.27142	-1.17012
AURKB	YDL211C	0.278204	-1.45235
AURKB	YDL215C	4.48766	0.89472
AURKB	YDL216C	0.00260004	-0.839791
AURKB	YDL218W	3.62445	0.347197
AURKB	YDL219W	2.25423	0.0627215
AURKB	YDL222C	2.82104	-1.22221
AURKB	YDL223C	1.02441	-0.695009
AURKB	YDL224C	1.59902	-0.577389
AURKB	YDL225W	2.24383	0.886426
AURKB	YDL226C	1.63282	0.65609
AURKB	YDL227C	3.35145	-0.598968
AURKB	YDL229W	0.754011	-0.174046
AURKB	YDL230W	2.79764	-0.00901129
AURKB	YDL231C	2.07483	-0.789657
AURKB	YDL233W	4.40966	0.420418
AURKB	YDL234C	1.28962	-0.289103
AURKB	YDL236W	0.252204	-1.31325
AURKB	YDL237W	2.47783	1.08347
AURKB	YDL238C	0.69161	-0.770865
AURKB	YDL239C	1.04001	-0.851185
AURKB	YDL240W	1.63542	-0.0926193
AURKB	YDL241W	0.972414	-0.591498
AURKB	YDL242W	2.18143	-0.484548
AURKB	YDL243C	4.49286	1.6314
AURKB	YDR001C	6.59889	3.16056
AURKB	YDR003W	0.868412	-1.02998
AURKB	YDR004W	0.124802	-0.340075
AURKB	YDR005C	0.260004	-0.827068
AURKB	YDR006C	3.09144	-0.527615
AURKB	YDR009W	1.61722	-0.970389
AURKB	YDR010C	1.31302	-1.05113
AURKB	YDR011W	2.56884	0.223612
AURKB	YDR014W	0.00520007	-1.09991
AURKB	YDR015C	1.50542	-0.0728786
AURKB	YDR018C	1.51842	-0.72393
AURKB	YDR019C	3.90005	0.259157
AURKB	YDR022C	1.75242	-1.08406
AURKB	YDR026C	3.23705	0.333683
AURKB	YDR028C	2.60524	0.421242
AURKB	YDR029W	3.45805	0.0497862
AURKB	YDR030C	2.71704	-0.184813
AURKB	YDR031W	7.1839	3.03761
AURKB	YDR032C	2.04883	0.565213
AURKB	YDR033W	3.24485	0.582116
AURKB	YDR034C	0.340605	-0.735341
AURKB	YDR035W	2.56364	-0.416788
AURKB	YDR036C	0.202803	-1.44634
AURKB	YDR042C	0.335405	-1.51092
AURKB	YDR043C	3.07324	1.62773
AURKB	YDR046C	1.99943	-0.708074
AURKB	YDR048C	0.00260004	-1.16128
AURKB	YDR049W	0.579808	0.946441
AURKB	YDR055W	1.86423	1.67923
AURKB	YDR056C	2.32963	0.621347
AURKB	YDR057W	1.44822	2.07371
AURKB	YDR059C	2.00463	0.43773
AURKB	YDR061W	1.65102	0.124471
AURKB	YDR063W	0.390005	-1.01636
AURKB	YDR066C	1.21942	-0.597871
AURKB	YDR067C	5.21307	0.326545
AURKB	YDR068W	2.40243	0.452156
AURKB	YDR070C	0.260004	-0.7543
AURKB	YDR072C	0.270404	-0.574183
AURKB	YDR073W	2.91464	1.35657
AURKB	YDR075W	0.525207	-0.120547
AURKB	YDR077W	0.0572008	-1.40242
AURKB	YDR078C	0.150802	-1.24943
AURKB	YDR080W	0.00260004	-1.03593
AURKB	YDR084C	0.187203	-1.08791
AURKB	YDR085C	0.00260004	-1.40784
AURKB	YDR089W	6.18549	2.31703
AURKB	YDR090C	0.392605	-1.75953
AURKB	YDR093W	3.87405	2.9959
AURKB	YDR094W	0.351005	-0.939859
AURKB	YDR095C	0.00260004	-1.65244
AURKB	YDR096W	1.29222	0.0550225
AURKB	YDR097C	1.37022	-0.330299
AURKB	YDR098C	0.910013	-0.192983
AURKB	YDR099W	0.280804	-1.24497
AURKB	YDR100W	0.158602	-1.13122
AURKB	YDR102C	0.0130002	-1.24588
AURKB	YDR104C	1.48202	0.345197
AURKB	YDR107C	0.00260004	-1.65832
AURKB	YDR108W	0.00520007	-1.38707
AURKB	YDR109C	0.221003	-1.12778
AURKB	YDR110W	0.140402	-1.17914
AURKB	YDR111C	0.187203	-1.08269
AURKB	YDR112W	0.933413	-0.782666
AURKB	YDR117C	0.876212	0.00392574
AURKB	YDR119W	4.23286	1.87983
AURKB	YDR121W	0.00520007	-1.32914
AURKB	YDR122W	3.63745	1.2185
AURKB	YDR123C	0.533007	-2.14403
AURKB	YDR124W	2.29583	0.204004
AURKB	YDR125C	1.65102	3.34474
AURKB	YDR128W	2.12163	0.975531
AURKB	YDR130C	0.00520007	-1.58112
AURKB	YDR131C	0.317204	-1.06181
AURKB	YDR132C	1.01921	0.285561
AURKB	YDR133C	1.21682	-0.585616
AURKB	YDR134C	4.15226	1.49266
AURKB	YDR135C	0.72281	-0.715005
AURKB	YDR139C	0.904813	-0.526715
AURKB	YDR142C	0.345805	-0.507369
AURKB	YDR143C	1.80183	0.0380552
AURKB	YDR144C	0.223603	-0.858909
AURKB	YDR146C	1.71342	0.086066
AURKB	YDR148C	2.33743	1.826
AURKB	YDR151C	0.150802	-1.11377
AURKB	YDR152W	1.56262	0.138061
AURKB	YDR153C	6.8173	2.02629
AURKB	YDR154C	0.962013	1.53731
AURKB	YDR156W	0.0546008	-0.467409
AURKB	YDR157W	2.87304	2.98302
AURKB	YDR162C	0.00260004	-1.13976
AURKB	YDR163W	0.00780011	-1.03261
AURKB	YDR169C	0.400406	-0.810303
AURKB	YDR171W	2.76904	0.532851
AURKB	YDR175C	0.0156002	-0.707107
AURKB	YDR178W	1.26362	1.18963
AURKB	YDR179W-A	0.0104001	-0.904231
AURKB	YDR181C	0.00260004	-1.22967
AURKB	YDR183W	0.117002	-1.06687
AURKB	YDR184C	0.665609	0.945036
AURKB	YDR191W	0.270404	-1.12411
AURKB	YDR192C	0.842412	-0.292429
AURKB	YDR193W	0.153402	-0.856199
AURKB	YDR197W	0.00260004	-1.0784
AURKB	YDR202C	0.920413	0.441774
AURKB	YDR203W	0.00520007	-0.869145
AURKB	YDR205W	2.22563	0.31419
AURKB	YDR206W	0.265204	-0.909309
AURKB	YDR209C	0.0416006	-1.18444
AURKB	YDR210W	0.156002	-0.98763
AURKB	YDR213W	1.34942	0.945038
AURKB	YDR214W	1.56782	0.406859
AURKB	YDR215C	0.0208003	-0.581367
AURKB	YDR216W	0.218403	-1.07906
AURKB	YDR217C	0.403006	-0.147199
AURKB	YDR218C	0.00260004	-1.08636
AURKB	YDR219C	2.20743	2.11165
AURKB	YDR220C	0.00260004	-0.993632
AURKB	YDR221W	0.863212	0.00660562
AURKB	YDR222W	2.27763	2.74081
AURKB	YDR229W	1.52102	0.653359
AURKB	YDR231C	1.27922	0.68683
AURKB	YDR233C	4.61506	3.08563
AURKB	YDR239C	2.45443	1.53776
AURKB	YDR244W	0.106601	-1.04221
AURKB	YDR247W	1.70302	1.22599
AURKB	YDR248C	0.137802	-0.965033
AURKB	YDR249C	0.153402	-0.75851
AURKB	YDR250C	0.278204	-0.742283
AURKB	YDR251W	0.236603	-0.636516
AURKB	YDR252W	0.00260004	-1.48531
AURKB	YDR253C	0.343205	-0.244555
AURKB	YDR255C	0.00260004	-1.04862
AURKB	YDR256C	0.972414	0.0333806
AURKB	YDR257C	0.663009	-0.232928
AURKB	YDR258C	0.395206	-0.828427
AURKB	YDR259C	0.598008	-0.481835
AURKB	YDR261C	0.0988014	-1.20144
AURKB	YDR262W	0.252204	0.263559
AURKB	YDR263C	1.25842	0.156846
AURKB	YDR265W	0.00780011	-1.28215
AURKB	YDR269C	1.57562	-0.296948
AURKB	YDR271C	0.0780011	-1.07081
AURKB	YDR272W	0.319804	-0.874084
AURKB	YDR273W	1.75502	1.18479
AURKB	YDR274C	0.0988014	-0.754507
AURKB	YDR275W	0.00520007	-1.16233
AURKB	YDR276C	0.239203	0.146016
AURKB	YDR277C	0.00260004	-1.0854
AURKB	YDR287W	1.03481	3.13845
AURKB	YDR290W	1.20382	-0.690967
AURKB	YDR291W	1.83043	3.04124
AURKB	YDR294C	0.390005	-0.544684
AURKB	YDR297W	0.00260004	-1.57628
AURKB	YDR304C	1.82783	1.96021
AURKB	YDR307W	0.68641	0.308302
AURKB	YDR308C	1.64582	1.15468
AURKB	YDR309C	0.00260004	-1.39257
AURKB	YDR310C	0.0312004	-1.00801
AURKB	YDR312W	0.465407	-0.204136
AURKB	YDR313C	1.28702	1.73398
AURKB	YDR314C	0.163802	-1.09737
AURKB	YDR316W	0.899613	1.25835
AURKB	YDR317W	0.374405	-0.0413779
AURKB	YDR321W	0.00260004	-1.22615
AURKB	YDR322W	0.600608	2.80363
AURKB	YDR326C	1.32862	0.25923
AURKB	YDR329C	0.101401	-0.924256
AURKB	YDR330W	1.05041	0.717464
AURKB	YDR333C	0.0338005	-1.23017
AURKB	YDR335W	0.860612	2.57077
AURKB	YEL001C	0.161202	-1.24932
AURKB	YEL004W	1.86943	0.66463
AURKB	YEL009C	1.85383	0.438422
AURKB	YEL010W	0.00260004	-0.951974
AURKB	YEL011W	1.76022	-0.234955
AURKB	YEL012W	0.998414	-0.658114
AURKB	YEL013W	0.587608	-0.467034
AURKB	YEL014C	0.639609	-0.636448
AURKB	YEL015W	0.904813	1.39233
AURKB	YEL016C	3.35145	2.35802
AURKB	YEL017C-A	0.403006	-0.541726
AURKB	YEL017W	0.00520007	-0.828844
AURKB	YEL020C	0.598008	0.454553
AURKB	YEL023C	0.655209	-0.261176
AURKB	YEL025C	0.891812	-0.338232
AURKB	YEL028W	1.61982	-0.201719
AURKB	YEL030W	0.215803	-1.09912
AURKB	YEL037C	0.923013	0.313589
AURKB	YEL038W	0.148202	-0.972524
AURKB	YEL039C	0.338005	-0.641637
AURKB	YEL040W	1.00881	-0.44378
AURKB	YEL041W	2.02803	-0.109233
AURKB	YEL042W	1.72902	0.88523
AURKB	YEL043W	3.41905	2.8826
AURKB	YEL047C	1.29482	-0.875589
AURKB	YEL048C	3.36445	1.30917
AURKB	YEL049W	2.08003	0.178181
AURKB	YEL052W	2.63384	0.682864
AURKB	YEL053C	2.16323	1.08043
AURKB	YEL054C	0.213203	0.886821
AURKB	YEL056W	1.39362	0.0788665
AURKB	YEL057C	0.462806	-1.2545
AURKB	YEL059W	1.39622	-0.388213
AURKB	YEL060C	1.94743	1.84737
AURKB	YEL062W	3.98066	1.81788
AURKB	YEL063C	2.06183	0.707653
AURKB	YEL064C	2.02283	1.04243
AURKB	YEL065W	2.14503	0.770549
AURKB	YEL066W	3.14604	1.55268
AURKB	YEL067C	2.80024	0.18177
AURKB	YEL068C	0.416006	-1.3266
AURKB	YEL071W	4.15226	2.25922
AURKB	YER001W	1.84083	0.018614
AURKB	YER004W	0.00520007	-1.16013
AURKB	YER005W	0.507007	-0.410808
AURKB	YER007C-A	0.71501	-0.32861
AURKB	YER007W	0.832012	0.0200672
AURKB	YER011W	1.37022	1.00934
AURKB	YER017C	0.00260004	-0.707107
AURKB	YER019C-A	0.223603	-0.989105
AURKB	YER020W	2.45963	0.599729
AURKB	YER024W	1.51322	-0.0156029
AURKB	YER028C	1.13362	-0.433942
AURKB	YER030W	2.20743	0.484962
AURKB	YER031C	0.777411	-0.037712
AURKB	YER034W	1.70562	0.919726
AURKB	YER038W-A	3.71025	3.43625
AURKB	YER039C	0.0676009	-0.783516
AURKB	YER040W	1.86683	3.23776
AURKB	YER042W	0.195003	-1.50294
AURKB	YER044C-A	0.135202	-1.58984
AURKB	YER045C	4.20426	3.49335
AURKB	YER046W	2.07483	-0.82063
AURKB	YER046W-A	0.551208	0.0871777
AURKB	YER047C	0.119602	0.415789
AURKB	YER048C	0.439406	-0.39723
AURKB	YER049W	0.265204	-1.10417
AURKB	YER053C	3.74925	3.22085
AURKB	YER055C	3.75965	2.18895
AURKB	YER056C	2.98484	1.861
AURKB	YER056C-A	0.543408	-0.33087
AURKB	YER057C	3.07064	0.67185
AURKB	YER058W	1.64842	2.50639
AURKB	YER059W	4.43306	1.66382
AURKB	YER060W	0.117002	-1.52702
AURKB	YER060W-A	1.38062	0.108526
AURKB	YER062C	0.938613	0.262474
AURKB	YER063W	0.72281	-1.65703
AURKB	YER064C	3.42685	1.39253
AURKB	YER065C	0.439406	-0.970353
AURKB	YER066W	3.72325	2.26806
AURKB	YER067W	0.145602	-0.993783
AURKB	YER071C	0.0806011	-0.979367
AURKB	YER072W	3.09664	3.49657
AURKB	YER073W	1.47942	-0.699576
AURKB	YER075C	0.995814	-0.34655
AURKB	YER078C	0.00260004	-0.892084
AURKB	YER079W	0.457606	-0.84964
AURKB	YER080W	1.41962	0.375597
AURKB	YER081W	0.00260004	-1.27216
AURKB	YER084W	0.0104001	-1.07731
AURKB	YER085C	0.413406	-0.968155
AURKB	YER087C-A	3.84545	3.03986
AURKB	YER088C	0.964614	0.311445
AURKB	YER089C	0.751411	-0.404085
AURKB	YER093C-A	2.37123	0.806852
AURKB	YER096W	1.92403	-0.0114628
AURKB	YER097W	1.25062	-0.0908113
AURKB	YER098W	4.36286	0.844568
AURKB	YER101C	0.67861	1.13891
AURKB	YER103W	0.73061	-0.0644861
AURKB	YER106W	1.33642	0.031333
AURKB	YER108C	0.572008	-0.344675
AURKB	YER109C	0.00260004	-1.41786
AURKB	YER113C	0.179403	-0.583254
AURKB	YER114C	0.517407	-0.140431
AURKB	YER115C	1.79403	0.870355
AURKB	YER118C	1.60422	2.15166
AURKB	YER120W	0.0754011	-0.928065
AURKB	YER121W	1.41702	1.19996
AURKB	YER123W	0.998414	0.454326
AURKB	YER124C	2.76384	1.74969
AURKB	YER128W	2.31923	1.4276
AURKB	YER129W	1.70302	1.39687
AURKB	YER130C	1.28702	2.29956
AURKB	YER132C	6.9499	4.07886
AURKB	YER134C	1.01141	0.559268
AURKB	YER135C	0.00260004	-0.719175
AURKB	YER137C	0.202803	-1.15818
AURKB	YER138C-A	1.26882	1.60583
AURKB	YER139C	0.00260004	-1.09714
AURKB	YER140W	1.16222	-0.481919
AURKB	YER142C	0.340605	-0.740576
AURKB	YER145C-A	0.322405	-0.580475
AURKB	YER146W	1.11282	0.62954
AURKB	YER148W	3.99366	3.83867
AURKB	YER153C	1.28442	0.380675
AURKB	YER157W	0.821612	-0.344603
AURKB	YER158C	2.77164	1.67794
AURKB	YER160C	2.56364	1.15782
AURKB	YER163C	0.889212	-0.283247
AURKB	YER167W	2.41283	1.96573
AURKB	YER171W	2.62864	2.14577
AURKB	YER172C	0.00780011	-1.51758
AURKB	YER172C-A	1.71862	0.428019
AURKB	YER173W	0.507007	-0.323199
AURKB	YER174C	0.130002	-1.03862
AURKB	YER175C	0.192403	-1.0545
AURKB	YER176W	1.57822	1.15661
AURKB	YER177W	0.806011	-0.00565171
AURKB	YER178W	0.0936013	-1.27719
AURKB	YER180C	0.143002	-0.903367
AURKB	YER181C	0.72281	0.286281
AURKB	YER182W	1.11022	0.707659
AURKB	YER183C	1.48462	2.50646
AURKB	YER184C	0.00260004	-1.21035
AURKB	YER185W	0.520007	-0.972425
AURKB	YER186C	0.187203	-1.22862
AURKB	YER187W	0.252204	-0.928487
AURKB	YHL002W	3.94946	-0.069775
AURKB	YHL003C	7.2801	0.767319
AURKB	YHL005C	1.39622	1.30715
AURKB	YHL006C	0.73581	-0.254799
AURKB	YHL008C	2.62864	1.54883
AURKB	YHL009C	0.325005	-0.304376
AURKB	YHL010C	0.184603	-0.959183
AURKB	YHL013C	0.00260004	-1.28377
AURKB	YHL014C	3.86625	1.19366
AURKB	YHL016C	0.579808	0.123347
AURKB	YHL017W	0.161202	-0.750474
AURKB	YHL019C	1.25842	1.11718
AURKB	YHL021C	0.184603	-0.560978
AURKB	YHL022C	0.460206	-0.560459
AURKB	YHL023C	0.993214	-0.0796323
AURKB	YHL024W	3.20324	2.70954
AURKB	YHL026C	0.751411	0.106057
AURKB	YHL027W	0.382205	-0.820977
AURKB	YHL028W	0.304204	-0.812986
AURKB	YHL029C	5.53288	1.36588
AURKB	YHL030W	2.93804	2.46149
AURKB	YHL032C	1.29482	0.730104
AURKB	YHL034C	2.14243	2.67547
AURKB	YHL035C	0.972414	0.514428
AURKB	YHL037C	1.73422	2.00312
AURKB	YHL038C	2.11643	2.72036
AURKB	YHL039W	1.70042	0.160243
AURKB	YHL040C	0.69161	-0.249728
AURKB	YHL041W	1.70302	0.326763
AURKB	YHL042W	2.32963	0.187295
AURKB	YHL043W	0.504407	-0.87591
AURKB	YHL045W	0.221003	-1.33674
AURKB	YHL047C	1.22202	-0.197676
AURKB	YHR001W-A	1.06081	0.165192
AURKB	YHR003C	3.56465	0.302203
AURKB	YHR004C	0.166402	-0.283783
AURKB	YHR006W	1.67442	-0.709713
AURKB	YHR009C	1.79923	-0.0532501
AURKB	YHR015W	0.00260004	-1.47897
AURKB	YHR016C	0.163802	-1.56031
AURKB	YHR017W	0.179403	-0.598152
AURKB	YHR018C	0.928213	-0.493077
AURKB	YHR022C	0.839812	-0.524376
AURKB	YHR028C	1.48202	-0.213672
AURKB	YHR032W	0.202803	-0.59765
AURKB	YHR033W	2.35563	0.32725
AURKB	YHR035W	1.32082	-0.47309
AURKB	YHR037W	0.00260004	-1.64917
AURKB	YHR039C	0.439406	0.466475
AURKB	YHR043C	0.327605	-0.97162
AURKB	YHR045W	3.01084	0.997655
AURKB	YHR046C	0.0780011	-0.426265
AURKB	YHR049C-A	0.990614	0.0309309
AURKB	YHR057C	0.00260004	-1.35741
AURKB	YHR061C	0.0962013	-1.36422
AURKB	YHR075C	1.69002	1.68273
AURKB	YHR076W	0.772211	0.173691
AURKB	YHR078W	1.09982	0.258265
AURKB	YHR079C	0.556408	-0.514513
AURKB	YHR080C	0.00260004	-1.06492
AURKB	YHR082C	1.76802	0.94742
AURKB	YHR086W	1.69002	0.0162106
AURKB	YHR087W	0.377005	-0.591802
AURKB	YHR092C	0.447206	-0.601994
AURKB	YHR093W	1.82783	0.848198
AURKB	YHR094C	1.33382	0.151657
AURKB	YHR095W	0.891812	-0.265073
AURKB	YHR097C	1.20382	0.636783
AURKB	YHR103W	0.00260004	-0.834637
AURKB	YHR104W	0.938613	0.877273
AURKB	YHR105W	1.42742	1.52469
AURKB	YHR106W	0.504407	-0.800523
AURKB	YHR109W	1.27402	0.878928
AURKB	YHR110W	0.0546008	-1.36435
AURKB	YHR112C	0.405606	-0.343196
AURKB	YHR113W	1.34162	0.812103
AURKB	YHR114W	0.69941	-0.637055
AURKB	YHR115C	0.387405	-0.456952
AURKB	YHR116W	0.00520007	-0.932831
AURKB	YHR121W	2.71964	1.37294
AURKB	YHR123W	0.158602	-0.906383
AURKB	YHR125W	0.247003	-1.00539
AURKB	YHR126C	1.90583	1.09826
AURKB	YHR127W	0.325005	-1.69303
AURKB	YHR130C	0.572008	-0.447339
AURKB	YHR131C	1.35722	-0.424092
AURKB	YHR132C	2.97184	1.76101
AURKB	YHR134W	0.00260004	-0.754386
AURKB	YHR135C	0.938613	0.887692
AURKB	YHR136C	0.130002	-0.918367
AURKB	YHR137W	0.104001	-1.06868
AURKB	YHR138C	1.75762	-0.0818256
AURKB	YHR139C	1.19602	0.670534
AURKB	YHR139C-A	0.769611	-0.426036
AURKB	YHR140W	0.72801	-0.477319
AURKB	YHR142W	0.00260004	-1.09149
AURKB	YHR146W	2.31923	1.47991
AURKB	YHR150W	0.101401	-0.948104
AURKB	YHR151C	1.58862	2.26141
AURKB	YHR152W	1.77582	0.917332
AURKB	YHR153C	0.429006	-0.604355
AURKB	YHR155W	2.53504	0.432039
AURKB	YHR156C	0.413406	-0.557381
AURKB	YHR157W	0.195003	-0.774247
AURKB	YHR158C	0.69941	-0.518848
AURKB	YHR159W	0.223603	-0.497918
AURKB	YHR160C	1.65882	1.86751
AURKB	YHR161C	0.117002	-1.19524
AURKB	YHR162W	0.00260004	-1.19948
AURKB	YHR171W	1.15182	0.0529842
AURKB	YHR176W	0.0598008	-0.835175
AURKB	YHR177W	0.74101	-0.57495
AURKB	YHR179W	0.782611	0.399193
AURKB	YHR180W	0.317204	-1.66904
AURKB	YHR181W	2.05403	0.57034
AURKB	YHR182W	0.0234003	-1.26612
AURKB	YHR184W	1.24022	0.0216364
AURKB	YHR185C	1.14402	-0.580964
AURKB	YHR189W	1.61202	1.29738
AURKB	YHR195W	0.785211	0.765749
AURKB	YHR198C	1.67182	0.84322
AURKB	YHR199C	0.624009	-0.235874
AURKB	YHR204W	0.00260004	-0.690953
AURKB	YHR206W	0.460206	-0.528581
AURKB	YHR207C	2.84964	3.77073
AURKB	YHR209W	0.852812	-0.336409
AURKB	YHR210C	0.00260004	-1.22495
AURKB	YIL001W	2.13203	1.10812
AURKB	YIL002C	0.0338005	-1.21101
AURKB	YIL006W	2.69104	0.507657
AURKB	YIL007C	3.95726	1.56929
AURKB	YIL009W	9.43553	2.58542
AURKB	YIL010W	4.90107	0.266636
AURKB	YIL011W	0.803411	-0.0806973
AURKB	YIL012W	0.325005	-0.568377
AURKB	YIL013C	0.943813	-0.339659
AURKB	YIL014W	2.23343	1.63719
AURKB	YIL015W	0.0156002	-0.625652
AURKB	YIL020C	1.36762	2.74341
AURKB	YIL023C	2.33743	2.9028
AURKB	YIL028W	2.36343	2.04336
AURKB	YIL029C	0.858012	0.300908
AURKB	YIL032C	0.0312004	-0.978762
AURKB	YIL037C	0.00260004	-0.379588
AURKB	YIL038C	21.2137	1.59846
AURKB	YIL041W	0.192403	-0.674491
AURKB	YIL042C	0.241803	-0.898668
AURKB	YIL043C	0.564208	2.50254
AURKB	YIL044C	0.114402	-0.479118
AURKB	YIL045W	0.468007	-0.446118
AURKB	YIL050W	4.27446	1.76795
AURKB	YIL052C	1.40142	0.694715
AURKB	YIL053W	0.0364005	-1.05538
AURKB	YIL054W	0.184603	-1.02353
AURKB	YIL055C	3.58025	1.31457
AURKB	YIL056W	3.91045	-0.255706
AURKB	YIL057C	0.00260004	-0.732912
AURKB	YIL059C	3.12004	0.19461
AURKB	YIL060W	1.19862	3.18035
AURKB	YIL064W	1.07382	0.233881
AURKB	YIL066C	3.92345	0.313461
AURKB	YIL067C	0.200203	-0.808399
AURKB	YIL069C	0.808611	0.742564
AURKB	YIL070C	0.189803	-1.41371
AURKB	YIL071C	1.47682	-1.05681
AURKB	YIL073C	1.95263	0.239853
AURKB	YIL074C	3.64005	-0.247036
AURKB	YIL076W	6.50789	3.72043
AURKB	YIL077C	3.15644	3.11627
AURKB	YIL084C	2.42843	2.12116
AURKB	YIL085C	2.57144	0.352306
AURKB	YIL086C	0.868412	-0.534606
AURKB	YIL087C	0.514807	-1.40474
AURKB	YIL088C	2.55324	0.161288
AURKB	YIL089W	5.90468	0.667743
AURKB	YIL090W	2.29583	2.13016
AURKB	YIL092W	2.76384	-0.218945
AURKB	YIL094C	0.538208	0.0422057
AURKB	YIL095W	0.938613	-0.0868798
AURKB	YIL096C	2.17363	1.75336
AURKB	YIL098C	1.80703	0.127312
AURKB	YIL099W	2.77944	0.898142
AURKB	YIL100W	0.312004	1.32917
AURKB	YIL101C	0.202803	-0.815973
AURKB	YIL102C	0.67861	0.0112664
AURKB	YIL105C	2.26723	1.9748
AURKB	YIL108W	1.43522	-0.581118
AURKB	YIL110W	0.174202	-0.0478638
AURKB	YIL111W	1.72902	0.971107
AURKB	YIL112W	0.0338005	-1.13496
AURKB	YIL113W	0.291204	-0.549535
AURKB	YIL114C	5.32227	3.02245
AURKB	YIL116W	0.119602	-0.30141
AURKB	YIL117C	0.153402	-1.39987
AURKB	YIL119C	1.61202	1.46589
AURKB	YIL120W	0.811211	-2.31938
AURKB	YIL121W	0.0910013	-0.923005
AURKB	YIL123W	0.163802	-0.382628
AURKB	YIL124W	2.82884	1.30429
AURKB	YIL130W	0.582408	-1.56707
AURKB	YIL131C	3.42945	1.92288
AURKB	YIL132C	1.99683	0.247682
AURKB	YIL135C	0.275604	-0.999173
AURKB	YIL136W	2.06443	2.45147
AURKB	YIL137C	3.04464	1.13108
AURKB	YIL138C	0.158602	-1.03371
AURKB	YIL140W	0.418606	-1.12946
AURKB	YIL141W	1.97343	0.139473
AURKB	YIL145C	2.15283	0.341216
AURKB	YIL146C	5.63948	2.00856
AURKB	YIL152W	2.83924	1.10623
AURKB	YIL155C	1.13102	-0.366677
AURKB	YIL156W	3.44765	1.59815
AURKB	YIL157C	1.06861	-0.409837
AURKB	YIL158W	0.73061	-0.0680744
AURKB	YIL159W	1.90063	0.58683
AURKB	YIL160C	1.01141	-0.385261
AURKB	YIL161W	0.850212	-0.548198
AURKB	YIL162W	2.39723	0.148941
AURKB	YIL163C	1.99683	-0.0787
AURKB	YIL164C	5.83968	3.32621
AURKB	YIL166C	0.0936013	-1.08598
AURKB	YIL167W	1.22202	-0.506933
AURKB	YIL168W	0.449806	-1.43791
AURKB	YIL170W	1.83563	-0.868469
AURKB	YIL173W	3.43205	0.207946
AURKB	YIR001C	2.28803	-0.185953
AURKB	YIR002C	1.53662	0.493551
AURKB	YIR003W	8.98573	2.57157
AURKB	YIR004W	0.569408	0.211078
AURKB	YIR007W	4.12626	0.597633
AURKB	YIR013C	0.613609	-1.6834
AURKB	YIR014W	6.07629	1.53092
AURKB	YIR016W	2.19443	-1.17969
AURKB	YJL005W	0.598008	1.00942
AURKB	YJL007C	1.14922	-0.951216
AURKB	YJL012C	1.94483	2.42728
AURKB	YJL013C	1.20642	-0.0131953
AURKB	YJL016W	2.73004	-0.0920836
AURKB	YJL017W	2.02023	0.5841
AURKB	YJL020C	0.236603	-0.991281
AURKB	YJL022W	0.871012	0.924525
AURKB	YJL024C	1.28702	1.5655
AURKB	YJL027C	1.07382	-1.19735
AURKB	YJL030W	0.663009	-0.958457
AURKB	YJL036W	3.81945	0.783269
AURKB	YJL037W	1.60942	-1.44953
AURKB	YJL038C	3.20844	0.532439
AURKB	YJL042W	6.75749	1.33097
AURKB	YJL043W	8.80112	3.5769
AURKB	YJL044C	0.215803	-1.478
AURKB	YJL045W	2.79244	0.123998
AURKB	YJL048C	1.78102	-0.995832
AURKB	YJL049W	2.76384	-0.456078
AURKB	YJL051W	5.23647	0.38133
AURKB	YJL052W	0.00260004	-1.10655
AURKB	YJL053W	0.137802	-1.15501
AURKB	YJL055W	0.889212	-1.25335
AURKB	YJL056C	0.00260004	-0.956402
AURKB	YJL057C	2.70664	1.13586
AURKB	YJL058C	1.33902	-1.47599
AURKB	YJL060W	5.09607	1.0735
AURKB	YJL064W	2.15803	-0.639607
AURKB	YJL065C	0.481007	-1.44999
AURKB	YJL066C	2.69624	1.10832
AURKB	YJL067W	2.87564	0.449659
AURKB	YJL068C	0.338005	-1.74837
AURKB	YJL070C	0.790411	-1.43572
AURKB	YJL071W	2.81324	0.782158
AURKB	YJL073W	2.99784	0.714524
AURKB	YJL077C	2.65724	-0.706924
AURKB	YJL078C	3.38265	1.60877
AURKB	YJL079C	1.03481	-0.810591
AURKB	YJL082W	1.48202	-0.162102
AURKB	YJL083W	2.99524	-0.342714
AURKB	YJL084C	1.55482	-0.926447
AURKB	YJL089W	4.24846	2.30429
AURKB	YJL092W	0.68901	1.97767
AURKB	YJL093C	2.13723	-0.391325
AURKB	YJL094C	2.99264	0.549659
AURKB	YJL096W	1.00361	1.7769
AURKB	YJL098W	1.71862	-0.882418
AURKB	YJL099W	0.436806	-1.00769
AURKB	YJL100W	1.51062	-1.24085
AURKB	YJL101C	0.189803	-1.26438
AURKB	YJL103C	1.85123	0.734568
AURKB	YJL105W	0.00260004	-1.52064
AURKB	YJL106W	2.78984	-0.420204
AURKB	YJL107C	6.24529	0.642818
AURKB	YJL108C	1.18302	-0.473395
AURKB	YJL110C	0.247003	-1.45528
AURKB	YJL112W	2.83924	0.741446
AURKB	YJL116C	1.94483	-0.748541
AURKB	YJL117W	0.00260004	-1.2204
AURKB	YJL118W	1.48722	-0.673318
AURKB	YJL119C	7.4491	2.60906
AURKB	YJL120W	1.81743	2.0912
AURKB	YJL121C	0.223603	0.17835
AURKB	YJL122W	0.400406	-2.09351
AURKB	YJL123C	0.842412	-1.09069
AURKB	YJL124C	1.68742	1.27144
AURKB	YJL126W	1.95783	0.00795883
AURKB	YJL128C	0.070201	-0.573427
AURKB	YJL130C	0.00780011	-1.02358
AURKB	YJL131C	0.132602	-0.588885
AURKB	YJL132W	6.8771	3.25156
AURKB	YJL133W	4.03006	3.57397
AURKB	YJL134W	0.592808	-1.61155
AURKB	YJL135W	0.431606	-1.48842
AURKB	YJL141C	0.572008	0.272857
AURKB	YJL142C	0.291204	-0.991353
AURKB	YJL144W	0.73061	-0.0288686
AURKB	YJL145W	1.13102	0.474569
AURKB	YJL146W	1.61722	2.00869
AURKB	YJL147C	0.218403	-1.16985
AURKB	YJL148W	0.314604	-0.521263
AURKB	YJL149W	0.00260004	-0.576885
AURKB	YJL150W	1.75242	0.508416
AURKB	YJL152W	0.897013	-0.409634
AURKB	YJL153C	2.06183	2.93684
AURKB	YJL155C	2.23863	3.56304
AURKB	YJL157C	0.353605	-0.611455
AURKB	YJL158C	0.345805	-0.769574
AURKB	YJL159W	0.343205	-0.349235
AURKB	YJL162C	0.00520007	-0.951431
AURKB	YJL164C	0.270404	-0.541742
AURKB	YJL166W	0.72281	1.0347
AURKB	YJL169W	3.12264	3.74576
AURKB	YJL170C	0.119602	-1.49772
AURKB	YJL171C	1.22202	-0.36379
AURKB	YJL177W	1.18562	3.43701
AURKB	YJL178C	0.00520007	-1.44361
AURKB	YJL179W	0.226203	0.365271
AURKB	YJL181W	0.00260004	-1.41427
AURKB	YJL185C	0.174202	-0.803317
AURKB	YJL186W	0.00260004	-1.51306
AURKB	YJL187C	2.36343	0.680036
AURKB	YJL190C	1.37542	1.49705
AURKB	YJL192C	0.769611	1.19045
AURKB	YJL193W	1.05821	0.491833
AURKB	YJL197W	0.176802	-1.07262
AURKB	YJL198W	0.0754011	-0.870946
AURKB	YJL199C	1.43522	1.71624
AURKB	YJL206C-A	0.101401	-0.847597
AURKB	YJL207C	0.00260004	-1.16686
AURKB	YJL208C	0.68121	0.975557
AURKB	YJL210W	3.24485	2.07283
AURKB	YJL211C	0.00520007	-1.96692
AURKB	YJL212C	0.603208	-1.18707
AURKB	YJL213W	0.189803	-1.34244
AURKB	YJL214W	0.312004	-1.67483
AURKB	YJL215C	5.17407	2.04267
AURKB	YJL216C	2.42843	1.19287
AURKB	YJL217W	2.35563	1.67333
AURKB	YJL218W	3.91825	2.11445
AURKB	YJR001W	1.65882	0.113345
AURKB	YJR003C	0.158602	-1.54745
AURKB	YJR004C	1.64062	-0.629821
AURKB	YJR005W	3.19024	2.30197
AURKB	YJR008W	2.39463	2.2841
AURKB	YJR009C	2.11383	-0.00468154
AURKB	YJR010W	1.26622	0.0684419
AURKB	YJR011C	0.548608	-0.382642
AURKB	YJR014W	0.780011	-0.439126
AURKB	YJR015W	4.01186	1.75868
AURKB	YJR019C	2.98744	1.03079
AURKB	YJR020W	0.132602	-1.4297
AURKB	YJR021C	0.00260004	-1.25491
AURKB	YJR024C	0.452406	-0.639308
AURKB	YJR025C	4.11066	1.84724
AURKB	YJR026W	1.92923	0.6416
AURKB	YJR030C	0.241803	-0.446998
AURKB	YJR031C	2.48823	0.76081
AURKB	YJR033C	1.94223	0.920409
AURKB	YJR034W	0.0546008	-0.916076
AURKB	YJR035W	6.44549	3.53868
AURKB	YJR036C	0.0260004	-1.59005
AURKB	YJR037W	1.10502	-1.00653
AURKB	YJR038C	1.98123	0.12203
AURKB	YJR039W	1.99943	1.88153
AURKB	YJR040W	1.69262	0.976091
AURKB	YJR043C	0.166402	0.0286984
AURKB	YJR048W	1.49502	0.201736
AURKB	YJR049C	0.936013	0.212163
AURKB	YJR050W	1.51582	1.83097
AURKB	YJR051W	1.65362	-0.982543
AURKB	YJR052W	3.93386	3.71049
AURKB	YJR054W	2.17103	1.56252
AURKB	YJR056C	1.06601	-0.259287
AURKB	YJR058C	2.74564	0.875633
AURKB	YJR059W	0.68641	0.684114
AURKB	YJR061W	1.76802	-0.264475
AURKB	YJR062C	0.0130002	-1.54307
AURKB	YJR066W	1.33642	0.135971
AURKB	YJR069C	1.09202	0.174339
AURKB	YJR070C	0.158602	-0.70709
AURKB	YJR073C	0.215803	-0.964294
AURKB	YJR075W	0.533007	-0.31288
AURKB	YJR077C	1.07642	1.48266
AURKB	YJR078W	0.213203	-2.06496
AURKB	YJR080C	0.143002	-1.1258
AURKB	YJR082C	1.23502	-0.866534
AURKB	YJR083C	0.231403	-1.06991
AURKB	YJR084W	0.902213	-0.514589
AURKB	YJR087W	3.41385	0.128764
AURKB	YJR088C	0.0416006	-0.664052
AURKB	YJR091C	1.67182	-0.731086
AURKB	YJR092W	1.89023	-0.932843
AURKB	YJR094C	1.56262	-1.11581
AURKB	YJR094W-A	0.657809	-0.151327
AURKB	YJR095W	3.04724	0.903341
AURKB	YJR096W	2.99004	-0.344582
AURKB	YJR097W	5.37428	2.82823
AURKB	YJR098C	8.47612	2.79701
AURKB	YJR099W	4.11846	1.63352
AURKB	YJR100C	0.995814	-0.970972
AURKB	YJR102C	0.306804	-0.69842
AURKB	YJR103W	0.00260004	-1.41168
AURKB	YJR106W	0.928213	-0.679306
AURKB	YJR107W	4.14706	0.641637
AURKB	YJR108W	1.62502	0.666962
AURKB	YJR109C	4.64627	0.487826
AURKB	YJR110W	0.200203	-1.38524
AURKB	YJR111C	1.53142	3.15117
AURKB	YJR113C	0.0910013	-0.668614
AURKB	YJR115W	3.20064	0.260705
AURKB	YJR116W	3.72065	0.349155
AURKB	YJR117W	6.70549	0.879922
AURKB	YJR119C	2.30623	0.0398771
AURKB	YJR120W	0.327605	-0.606643
AURKB	YJR124C	2.81324	1.06986
AURKB	YJR126C	3.52565	3.29442
AURKB	YJR127C	1.09982	-0.969777
AURKB	YJR128W	0.210603	-1.63787
AURKB	YJR129C	1.69522	0.778416
AURKB	YJR130C	1.76542	0.665798
AURKB	YJR131W	2.63124	-0.446557
AURKB	YJR133W	11.7964	3.87897
AURKB	YJR134C	2.35563	0.959951
AURKB	YJR135C	0.0104001	-0.984814
AURKB	YJR137C	0.824212	-0.836603
AURKB	YJR140C	0.322405	-0.653986
AURKB	YJR142W	1.94743	0.938877
AURKB	YJR144W	0.202803	-0.786771
AURKB	YJR146W	21.7025	2.32139
AURKB	YJR147W	0.855412	-0.12707
AURKB	YJR148W	0.0754011	-1.64744
AURKB	YJR149W	1.11542	0.0746502
AURKB	YJR150C	2.74044	-0.067052
AURKB	YJR152W	1.30002	-0.923881
AURKB	YJR153W	1.26102	-1.16987
AURKB	YJR154W	2.24123	1.44136
AURKB	YLL001W	0.00520007	-0.970387
AURKB	YLL005C	0.111802	-1.51524
AURKB	YLL007C	7.0981	0.147526
AURKB	YLL010C	0.161202	-0.756879
AURKB	YLL012W	1.05561	-0.679922
AURKB	YLL013C	2.03843	1.48154
AURKB	YLL014W	0.00260004	-1.04529
AURKB	YLL016W	2.82364	1.64066
AURKB	YLL017W	1.71602	0.929738
AURKB	YLL019C	0.187203	-1.119
AURKB	YLL020C	0.0650009	-0.940629
AURKB	YLL021W	0.00260004	-0.799181
AURKB	YLL023C	0.00520007	-0.894985
AURKB	YLL024C	1.51062	0.107658
AURKB	YLL026W	1.53662	0.412306
AURKB	YLL028W	0.423806	-0.998982
AURKB	YLL030C	3.25265	0.441348
AURKB	YLL032C	2.37383	0.64183
AURKB	YLL039C	0.907413	0.512621
AURKB	YLL041C	0.119602	-0.728918
AURKB	YLL042C	1.90063	-0.431488
AURKB	YLL044W	1.42482	2.03118
AURKB	YLL046C	3.42425	-0.154882
AURKB	YLL047W	3.29685	0.0559614
AURKB	YLL048C	1.43522	-0.252666
AURKB	YLL051C	0.117002	-1.95961
AURKB	YLL052C	1.98903	-0.000790507
AURKB	YLL053C	1.93963	-0.587204
AURKB	YLL054C	0.0546008	-1.74452
AURKB	YLL055W	0.00520007	-1.61426
AURKB	YLL056C	1.92663	-0.132911
AURKB	YLL057C	1.82783	-0.0408746
AURKB	YLL058W	6.51569	1.35029
AURKB	YLL059C	0.148202	-1.23001
AURKB	YLL060C	3.67385	-0.362717
AURKB	YLL061W	3.11224	0.288308
AURKB	YLL062C	2.60524	1.26642
AURKB	YLL063C	0.286004	-1.00447
AURKB	YLR001C	0.218403	-1.37424
AURKB	YLR003C	0.605808	-0.843847
AURKB	YLR004C	0.397806	-0.914115
AURKB	YLR006C	0.0546008	-0.954048
AURKB	YLR011W	0.00260004	-1.56046
AURKB	YLR012C	4.60466	2.83663
AURKB	YLR013W	0.366605	-1.44162
AURKB	YLR014C	0.00260004	-1.25775
AURKB	YLR016C	1.83563	0.418892
AURKB	YLR017W	5.32747	2.20893
AURKB	YLR018C	0.358805	-0.804068
AURKB	YLR019W	13.0886	1.42074
AURKB	YLR020C	0.657809	-0.866361
AURKB	YLR021W	1.98643	3.68732
AURKB	YLR023C	0.00260004	-1.36798
AURKB	YLR024C	0.769611	-0.112393
AURKB	YLR025W	1.93443	1.41025
AURKB	YLR028C	0.556408	-0.834403
AURKB	YLR030W	0.101401	-1.407
AURKB	YLR031W	0.410806	-0.889593
AURKB	YLR034C	1.49762	-0.15014
AURKB	YLR035C	1.59382	1.01422
AURKB	YLR036C	0.423806	-1.11391
AURKB	YLR037C	3.77005	2.4319
AURKB	YLR038C	1.01661	0.0791744
AURKB	YLR040C	3.62705	3.27826
AURKB	YLR041W	0.364005	-1.38908
AURKB	YLR042C	0.072801	-1.85961
AURKB	YLR043C	2.20483	1.61625
AURKB	YLR044C	0.553808	0.0369003
AURKB	YLR046C	0.507007	-0.0549367
AURKB	YLR047C	5.65508	2.43504
AURKB	YLR049C	0.0520007	-0.97262
AURKB	YLR053C	0.756611	0.079987
AURKB	YLR054C	0.0104001	-0.966729
AURKB	YLR055C	0.751411	2.44224
AURKB	YLR058C	1.47422	0.816685
AURKB	YLR059C	0.608409	0.107475
AURKB	YLR064W	0.00260004	-1.18729
AURKB	YLR070C	0.993214	-0.788256
AURKB	YLR072W	1.99943	0.618899
AURKB	YLR073C	0.286004	-1.04277
AURKB	YLR074C	1.52362	1.78884
AURKB	YLR077W	1.93183	-0.118991
AURKB	YLR080W	0.634409	-0.960484
AURKB	YLR081W	2.13723	0.941089
AURKB	YLR083C	0.0156002	-1.0814
AURKB	YLR084C	0.0988014	-1.24555
AURKB	YLR085C	0.0494007	-0.75208
AURKB	YLR089C	3.15124	3.83939
AURKB	YLR090W	0.387405	0.00983961
AURKB	YLR092W	0.475807	0.32992
AURKB	YLR094C	0.0390005	-0.502644
AURKB	YLR095C	1.94743	1.65487
AURKB	YLR096W	0.174202	-1.29546
AURKB	YLR097C	1.68482	0.431015
AURKB	YLR098C	0.130002	-0.934907
AURKB	YLR099C	1.21422	0.316139
AURKB	YLR102C	1.21162	1.69895
AURKB	YLR104W	0.585008	-0.954836
AURKB	YLR107W	3.25265	1.97971
AURKB	YLR108C	0.270404	-1.12583
AURKB	YLR109W	0.184603	-1.13594
AURKB	YLR110C	0.68121	-0.38667
AURKB	YLR111W	0.00520007	-1.16655
AURKB	YLR112W	0.267804	-1.02748
AURKB	YLR114C	3.39565	1.92754
AURKB	YLR118C	1.61462	-0.0769063
AURKB	YLR119W	1.13882	-0.461086
AURKB	YLR120C	0.0208003	-1.10582
AURKB	YLR121C	1.39362	-0.141647
AURKB	YLR122C	3.43985	1.69935
AURKB	YLR123C	1.47682	-0.386165
AURKB	YLR124W	0.00260004	-1.22499
AURKB	YLR125W	1.90843	1.11187
AURKB	YLR126C	0.117002	-1.55406
AURKB	YLR128W	0.130002	-0.816602
AURKB	YLR130C	0.338005	-0.68303
AURKB	YLR131C	2.57404	-0.016661
AURKB	YLR133W	0.371805	-0.52511
AURKB	YLR135W	0.223603	-1.14718
AURKB	YLR136C	1.01401	1.18246
AURKB	YLR137W	1.73162	1.0365
AURKB	YLR142W	0.907413	-0.313398
AURKB	YLR143W	0.153402	-0.354913
AURKB	YLR144C	0.00260004	-1.596
AURKB	YLR150W	0.249603	-0.467629
AURKB	YLR151C	0.00520007	-1.08003
AURKB	YLR164W	2.88864	2.1497
AURKB	YLR165C	1.46902	1.2927
AURKB	YLR168C	1.41442	3.74653
AURKB	YLR169W	0.546008	0.252097
AURKB	YLR170C	0.533007	-0.175569
AURKB	YLR171W	0.304204	-0.737521
AURKB	YLR172C	1.47422	1.8808
AURKB	YLR173W	0.0780011	-1.07099
AURKB	YLR174W	0.0936013	-0.969032
AURKB	YLR176C	0.504407	-0.373373
AURKB	YLR177W	0.0416006	-1.47441
AURKB	YLR178C	2.97184	2.30773
AURKB	YLR179C	0.00260004	-0.915167
AURKB	YLR180W	1.74202	0.792035
AURKB	YLR183C	1.69522	2.04363
AURKB	YLR187W	0.174202	-0.75267
AURKB	YLR188W	0.852812	-0.221294
AURKB	YLR192C	3.40085	0.531044
AURKB	YLR194C	0.0910013	-1.29916
AURKB	YLR199C	0.260004	-0.645174
AURKB	YLR203C	0.00260004	-1.49163
AURKB	YLR205C	0.335405	-0.481127
AURKB	YLR206W	0.616209	0.256403
AURKB	YLR207W	0.0858012	-1.36052
AURKB	YLR209C	0.0676009	-1.54622
AURKB	YLR210W	1.84343	0.714022
AURKB	YLR211C	1.01661	0.208491
AURKB	YLR213C	0.0572008	-0.744541
AURKB	YLR214W	0.00260004	-1.20952
AURKB	YLR218C	0.00260004	-0.84692
AURKB	YLR220W	0.00520007	-1.45671
AURKB	YLR224W	3.96506	1.02438
AURKB	YLR225C	1.91103	0.816838
AURKB	YLR227C	0.774811	0.439566
AURKB	YLR451W	0.156002	-0.871942
AURKB	YML001W	1.57562	0.993604
AURKB	YML004C	1.57562	1.15192
AURKB	YML005W	0.0260004	-1.59749
AURKB	YML006C	0.930813	0.142632
AURKB	YML007W	0.195003	-1.37739
AURKB	YML009c	4.30046	1.1323
AURKB	YML011C	1.18822	-1.21368
AURKB	YML012W	1.13102	1.11046
AURKB	YML016C	0.431606	-0.0171205
AURKB	YML017W	5.26507	1.94714
AURKB	YML018C	1.20382	0.364094
AURKB	YML022W	1.44302	0.127246
AURKB	YML027W	1.22982	0.293705
AURKB	YML028W	0.0650009	-0.934741
AURKB	YML029W	3.27345	1.76202
AURKB	YML030W	0.0182003	-0.661528
AURKB	YML031W	6.34669	1.87028
AURKB	YML032C-A	0.00260004	-1.34512
AURKB	YML033W	2.18923	3.64682
AURKB	YML034W	0.00520007	0.237993
AURKB	YML035C-A	1.62242	1.62832
AURKB	YML036W	7.0305	1.01355
AURKB	YML037C	2.31923	0.966764
AURKB	YML038C	0.351005	-1.40942
AURKB	YML042W	0.590208	-1.13276
AURKB	YML047C	0.00520007	-1.02287
AURKB	YML048W-A	0.0130002	-1.1382
AURKB	YML050W	2.83404	0.410287
AURKB	YML051W	1.70302	0.0275301
AURKB	YML052W	5.63428	3.4304
AURKB	YML053C	2.00463	1.21641
AURKB	YML054C	0.418606	-1.03745
AURKB	YML055W	1.05301	0.330701
AURKB	YML056C	0.538208	-0.760433
AURKB	YML057W	0.572008	-0.560695
AURKB	YML058C-A	0.145602	-1.07538
AURKB	YML058W	1.81223	1.78895
AURKB	YML059C	1.27662	-0.20853
AURKB	YML060W	0.782611	0.441218
AURKB	YML062C	1.62502	2.25035
AURKB	YML066C	1.17262	-1.11086
AURKB	YML068W	4.24326	3.06041
AURKB	YML070W	1.73942	0.713941
AURKB	YML071C	0.213203	-1.46708
AURKB	YML074C	1.54182	-0.457726
AURKB	YML076C	1.66402	0.391185
AURKB	YML078W	3.20064	0.853493
AURKB	YML079W	1.09722	-0.650172
AURKB	YML080W	0.0780011	-1.41983
AURKB	YML081W	4.86727	2.38461
AURKB	YML082W	0.988014	-0.69446
AURKB	YML083C	0.317204	-1.44652
AURKB	YML084W	0.0858012	-1.38537
AURKB	YML087C	4.10546	1.95933
AURKB	YML088W	1.19342	-0.547128
AURKB	YML089C	1.68222	-0.354506
AURKB	YML090W	0.0364005	-1.48314
AURKB	YML095C	0.345805	-1.32619
AURKB	YML096W	1.27922	-0.150534
AURKB	YML097C	1.13102	2.18351
AURKB	YML099C	0.153402	-1.11769
AURKB	YML100W-A	0.361405	-0.996314
AURKB	YML101C	1.50282	-0.959545
AURKB	YML102W	0.114402	-0.621945
AURKB	YML104C	3.15124	0.662875
AURKB	YML106W	1.14402	-0.0261996
AURKB	YML107C	1.59902	-0.160027
AURKB	YML108W	1.73682	1.81394
AURKB	YML109W	1.91883	0.00455583
AURKB	YML110C	0.00260004	-1.59412
AURKB	YML111W	2.51684	0.396479
AURKB	YML116W	0.00260004	-1.8431
AURKB	YML117W-A	1.29742	0.360351
AURKB	YML119W	0.769611	-0.756869
AURKB	YML120C	2.65724	1.53548
AURKB	YML121W	0.00260004	-0.601356
AURKB	YML122C	0.280804	-1.4077
AURKB	YML123C	0.826812	-1.12746
AURKB	YML128C	0.585008	-0.169735
AURKB	YML129C	1.90063	1.83763
AURKB	YML131W	1.34422	-0.170073
AURKB	YMR002W	0.0468007	-1.03163
AURKB	YMR003W	0.241803	-1.07163
AURKB	YMR004W	0.262604	-0.615227
AURKB	YMR006C	2.33743	0.289532
AURKB	YMR007W	2.74304	0.517435
AURKB	YMR008C	1.13622	-0.219522
AURKB	YMR009W	0.00780011	-1.73961
AURKB	YMR010W	2.48563	1.57445
AURKB	YMR011W	0.847612	0.0846084
AURKB	YMR012W	1.33382	-0.266686
AURKB	YMR015C	0.210603	-1.11057
AURKB	YMR017W	0.449806	-0.978934
AURKB	YMR018W	0.449806	-0.923784
AURKB	YMR019W	2.06443	0.598687
AURKB	YMR020W	1.48462	-0.00286487
AURKB	YMR022W	2.32703	-0.195505
AURKB	YMR023C	0.260004	-0.912256
AURKB	YMR025W	2.39983	3.53512
AURKB	YMR026C	0.208003	-0.30242
AURKB	YMR027W	1.50802	0.346711
AURKB	YMR029C	0.0234003	-1.08398
AURKB	YMR031C	2.44923	2.12157
AURKB	YMR034C	5.13507	3.06474
AURKB	YMR035W	0.00260004	-1.06029
AURKB	YMR036C	1.47682	2.31956
AURKB	YMR039C	1.22202	0.452596
AURKB	YMR040W	2.26723	0.770176
AURKB	YMR041C	0.69941	-0.782205
AURKB	YMR044W	0.00260004	-0.85215
AURKB	YMR048W	0.0104001	-1.32328
AURKB	YMR095C	0.00260004	-1.2776
AURKB	YMR096W	1.60942	0.498769
AURKB	YMR098C	0.0780011	-0.392867
AURKB	YMR099C	0.122202	-1.20152
AURKB	YMR100W	0.280804	-0.933786
AURKB	YMR101C	0.179403	-1.07242
AURKB	YMR102C	4.70347	2.71346
AURKB	YMR103C	0.891812	-0.344395
AURKB	YMR104C	4.76327	1.64003
AURKB	YMR105C	0.384805	-0.555296
AURKB	YMR106C	1.18562	-0.136572
AURKB	YMR107W	1.26622	0.812024
AURKB	YMR110C	1.46642	-0.0213299
AURKB	YMR111C	0.928213	-0.6322
AURKB	YMR114C	0.247003	-1.20626
AURKB	YMR115W	0.122202	-0.84831
AURKB	YMR118C	2.18403	-0.210848
AURKB	YMR119W-A	0.600608	-1.03438
AURKB	YMR120C	2.20483	2.83213
AURKB	YMR121C	0.660409	0.268033
AURKB	YMR124W	0.395206	-0.605546
AURKB	YMR126C	0.239203	-0.808207
AURKB	YMR127C	4.04566	3.06893
AURKB	YMR129W	0.819011	-0.676861
AURKB	YMR130W	0.642209	-0.382823
AURKB	YMR132C	0.252204	-1.09086
AURKB	YMR133W	0.00260004	-1.17448
AURKB	YMR135C	0.169002	-0.72676
AURKB	YMR140W	5.25727	1.60684
AURKB	YMR141C	0.0286004	-1.26115
AURKB	YMR144W	0.00260004	-1.57216
AURKB	YMR145C	2.56364	0.521655
AURKB	YMR147W	1.85383	-0.465221
AURKB	YMR148W	0.834612	-0.957579
AURKB	YMR151W	0.114402	-0.830131
AURKB	YMR152W	1.35982	1.28013
AURKB	YMR153C-A	4.57866	2.01354
AURKB	YMR153W	3.92605	1.26742
AURKB	YMR154C	1.59122	-1.13687
AURKB	YMR155W	4.59166	1.69686
AURKB	YMR157C	0.353605	-1.28818
AURKB	YMR158W	1.25062	1.86789
AURKB	YMR158W-A	0.122202	-1.81271
AURKB	YMR159C	3.88185	1.44056
AURKB	YMR161W	4.32906	0.467231
AURKB	YMR162C	0.00260004	-1.72792
AURKB	YMR163C	1.21162	-0.61356
AURKB	YMR164C	0.616209	-0.907053
AURKB	YMR166C	3.06024	1.0675
AURKB	YMR167W	0.205403	-1.40184
AURKB	YMR170C	5.38728	0.0706324
AURKB	YMR171C	0.782611	-0.688224
AURKB	YMR172C-A	0.390005	-1.14702
AURKB	YMR172W	4.29266	0.418719
AURKB	YMR173W-A	1.78623	0.661002
AURKB	YMR174c	1.14402	0.0795199
AURKB	YMR175w	0.0208003	-0.671672
AURKB	YMR176W	1.88503	-0.590419
AURKB	YMR177W	1.59642	-0.345103
AURKB	YMR178W	1.83303	0.402463
AURKB	YMR180C	2.06703	-0.236528
AURKB	YMR181C	0.00780011	-1.24115
AURKB	YMR182C	3.92866	1.78318
AURKB	YMR183C	1.52102	-0.242031
AURKB	YMR184W	0.127402	-1.4345
AURKB	YMR186W	1.36502	0.533759
AURKB	YMR187C	2.99784	0.776701
AURKB	YMR189W	1.18822	-0.551959
AURKB	YMR191W	4.02226	3.34578
AURKB	YMR192W	0.322405	-1.56757
AURKB	YMR195W	0.265204	-1.32152
AURKB	YMR196W	2.14503	0.823478
AURKB	YMR199W	1.03221	0.0692355
AURKB	YMR201C	2.37123	1.5215
AURKB	YMR204C	0.244403	-1.23982
AURKB	YMR206W	0.611009	-0.919668
AURKB	YMR207C	0.249603	-0.523538
AURKB	YMR209C	0.894413	-0.362329
AURKB	YMR210W	3.79085	0.653211
AURKB	YMR214W	0.0156002	-1.28061
AURKB	YMR215W	0.150802	-1.07699
AURKB	YMR216C	0.873612	0.145232
AURKB	YMR221C	1.06341	-0.4533
AURKB	YMR222C	0.171602	-0.825756
AURKB	YMR223W	2.61824	1.32218
AURKB	YMR225C	3.60885	1.92505
AURKB	YMR226C	2.22823	1.7666
AURKB	YMR232W	0.67861	-1.61874
AURKB	YMR233W	1.35462	-0.412576
AURKB	YMR234W	1.48202	0.00116626
AURKB	YMR238W	2.57664	1.19043
AURKB	YMR241W	0.891812	-0.377679
AURKB	YMR242C	0.00780011	-0.511496
AURKB	YMR244C-A	0.995814	1.94465
AURKB	YMR244W	1.15702	0.657133
AURKB	YMR245W	2.94844	3.69293
AURKB	YMR246W	2.23083	1.04159
AURKB	YMR247C	0.371805	-1.6188
AURKB	YMR250W	0.0546008	-0.266101
AURKB	YMR251W	1.51062	0.314686
AURKB	YMR251W-A	0.00780011	-1.37468
AURKB	YMR252C	0.595408	-0.99435
AURKB	YMR253C	1.11022	-0.340037
AURKB	YMR254C	0.590208	-0.655059
AURKB	YMR255W	0.00780011	-1.24258
AURKB	YMR259C	2.13723	-0.283187
AURKB	YMR261C	0.0104001	-0.796282
AURKB	YMR262W	0.169002	-2.08229
AURKB	YMR264W	2.28023	0.703906
AURKB	YMR265C	1.77842	-0.563634
AURKB	YMR271C	3.08624	0.336173
AURKB	YMR273C	1.21682	-0.271701
AURKB	YMR274C	3.15904	0.672514
AURKB	YMR275C	0.488807	-0.41997
AURKB	YMR276W	1.64842	-0.703196
AURKB	YMR278W	2.02023	-0.782149
AURKB	YMR279C	0.972414	-0.726096
AURKB	YMR280C	3.28385	1.35672
AURKB	YMR283C	1.75762	-0.142669
AURKB	YMR284W	0.585008	-1.08107
AURKB	YMR285C	3.28125	0.930962
AURKB	YMR289W	1.05041	0.11682
AURKB	YMR291W	0.210603	-1.38688
AURKB	YMR292W	1.49502	-0.652605
AURKB	YMR294W	0.0858012	-0.757678
AURKB	YMR294W-A	0.0442006	-1.25894
AURKB	YMR295C	0.0962013	-0.495343
AURKB	YMR302C	0.639609	-0.647855
AURKB	YMR303C	0.387405	-0.706149
AURKB	YMR304C-A	1.05821	-1.04685
AURKB	YMR304W	0.319804	-0.0852547
AURKB	YMR305C	5.60048	3.34092
AURKB	YMR306C-A	1.44822	-0.0307179
AURKB	YMR306W	2.21523	-0.253973
AURKB	YMR307W	6.09969	-0.311977
AURKB	YMR310C	0.371805	-0.227239
AURKB	YMR311C	7.62591	2.96006
AURKB	YMR313C	1.04001	-0.350827
AURKB	YMR315W	2.38943	0.0949333
AURKB	YMR316C-A	1.74982	1.07758
AURKB	YMR316C-B	0.0364005	-1.33336
AURKB	YMR316W	0.00260004	-1.47538
AURKB	YMR317W	3.01344	0.465058
AURKB	YMR318C	0.452406	-1.48601
AURKB	YMR319C	1.53662	-0.0675041
AURKB	YMR320W	3.02644	-0.0890842
AURKB	YNL051W	0.00260004	-1.19365
AURKB	YNL052W	1.35462	-0.385084
AURKB	YNL054W	1.66142	1.92549
AURKB	YNL056W	12.1682	1.27138
AURKB	YNL057W	1.67442	-0.438814
AURKB	YNL058C	0.254804	-0.710464
AURKB	YNL063W	5.39248	0.710459
AURKB	YNL065W	2.62864	0.00171151
AURKB	YNL066W	2.03583	-0.718708
AURKB	YNL067W	0.00260004	-1.18346
AURKB	YNL068C	5.21047	3.87618
AURKB	YNL070W	0.231403	-0.689395
AURKB	YNL071W	0.74621	0.117984
AURKB	YNL072W	1.93963	0.00628328
AURKB	YNL074C	4.36546	0.82629
AURKB	YNL076W	2.48563	0.389416
AURKB	YNL077W	0.00260004	-1.04655
AURKB	YNL078W	1.99163	-0.79021
AURKB	YNL082W	0.772211	-1.06147
AURKB	YNL083W	2.99524	1.41955
AURKB	YNL085W	2.20743	-0.102748
AURKB	YNL087W	8.68152	2.88328
AURKB	YNL090W	1.26622	-0.302575
AURKB	YNL092W	2.53764	-0.282724
AURKB	YNL093W	0.68121	-0.549149
AURKB	YNL094W	3.52825	1.12491
AURKB	YNL095C	2.45703	0.199469
AURKB	YNL099C	3.37745	-0.130402
AURKB	YNL100W	0.780011	-0.779668
AURKB	YNL101W	0.0234003	-1.99815
AURKB	YNL104C	1.67702	-0.213923
AURKB	YNL105W	4.50326	2.48076
AURKB	YNL106C	2.29583	0.851174
AURKB	YNL108C	2.25163	1.07052
AURKB	YNL115C	1.35462	0.443675
AURKB	YNL116W	1.10242	-0.20589
AURKB	YNL117W	0.104001	0.187346
AURKB	YNL121C	0.00260004	-0.943688
AURKB	YNL122C	1.21682	-0.498719
AURKB	YNL123W	1.61462	0.783648
AURKB	YNL125C	1.95523	-0.130216
AURKB	YNL128W	0.0754011	-1.58776
AURKB	YNL129W	2.55844	-0.142066
AURKB	YNL130C	0.153402	-1.19983
AURKB	YNL134C	4.13926	2.28547
AURKB	YNL135C	2.31143	3.48028
AURKB	YNL139C	0.821612	0.707107
AURKB	YNL141W	4.42526	2.05994
AURKB	YNL143C	0.782611	-1.57024
AURKB	YNL144C	2.20223	0.508937
AURKB	YNL145W	1.39622	-1.05962
AURKB	YNL146W	2.26203	-0.174231
AURKB	YNL154C	2.16323	2.19732
AURKB	YNL155W	0.767011	0.437666
AURKB	YNL157W	1.64582	2.50708
AURKB	YNL159C	1.75502	0.449597
AURKB	YNL160W	1.87983	2.94073
AURKB	YNL168C	1.11282	0.190912
AURKB	YNL173C	0.769611	-0.0262185
AURKB	YNL175C	1.33382	2.19496
AURKB	YNL176C	1.33382	1.89909
AURKB	YNL179C	0.213203	-0.784612
AURKB	YNL183C	1.75502	0.0573524
AURKB	YNL190W	2.12683	1.19707
AURKB	YNL191W	0.68641	-0.084096
AURKB	YNL193W	0.465407	-0.859423
AURKB	YNL194C	0.839812	-0.631213
AURKB	YNL195C	0.0884012	-1.50894
AURKB	YNL196C	0.0806011	-0.817888
AURKB	YNL198C	1.05821	0.151602
AURKB	YNL200C	1.14922	-0.570119
AURKB	YNL201C	0.756611	-0.151152
AURKB	YNL202W	4.01706	2.75323
AURKB	YNL204C	0.621409	0.258501
AURKB	YNL205C	1.13362	1.8551
AURKB	YNL206C	0.0468007	-1.00662
AURKB	YNL214W	6.9629	3.98393
AURKB	YNL215W	0.509607	1.95929
AURKB	YNL217W	1.78102	0.776587
AURKB	YNL219C	2.03843	1.71766
AURKB	YNL230C	0.0364005	-1.04433
AURKB	YNL231C	0.486207	-0.553525
AURKB	YNL235C	0.954213	0.477731
AURKB	YNL236W	0.0962013	-0.526486
AURKB	YNL239W	1.85383	1.38995
AURKB	YNL242W	0.137802	-1.00204
AURKB	YNL248C	0.533007	0.750051
AURKB	YNL249C	1.49502	-0.0857893
AURKB	YNL252C	0.161202	-0.973693
AURKB	YNL253W	2.03843	1.29716
AURKB	YNL254C	0.00260004	-1.34578
AURKB	YNL255C	2.27243	0.0878839
AURKB	YNL257C	9.30033	1.77036
AURKB	YNL259C	0.0130002	-1.05539
AURKB	YNL264C	0.317204	-0.770055
AURKB	YNL265C	1.03741	0.527838
AURKB	YNL266W	2.45183	1.2122
AURKB	YNL269W	1.91103	0.540572
AURKB	YNL270C	0.00780011	-1.42718
AURKB	YNL273W	0.226203	-0.191889
AURKB	YNL274C	2.24903	-0.90693
AURKB	YNL275W	0.397806	-1.24603
AURKB	YNL278W	0.176802	-0.748018
AURKB	YNL279W	9.55773	2.6794
AURKB	YNL281W	0.00520007	-1.46381
AURKB	YNL282W	0.00260004	-0.704169
AURKB	YNL283C	1.29222	1.31736
AURKB	YNL285W	1.45082	1.48191
AURKB	YNL286W	0.0598008	-0.726276
AURKB	YNL288W	2.87564	1.16051
AURKB	YNL289W	0.137802	-0.976455
AURKB	YNL291C	0.356205	-0.787172
AURKB	YNL292W	1.15962	0.398747
AURKB	YNL293W	0.312004	-1.13731
AURKB	YNL294C	2.91464	0.717046
AURKB	YNL295W	1.62242	-0.275054
AURKB	YNL299W	0.260004	-0.10397
AURKB	YNL300W	0.0754011	-1.28316
AURKB	YNL303W	0.798211	-0.479614
AURKB	YNL304W	0.0468007	-1.83109
AURKB	YNL305C	1.26102	-0.315031
AURKB	YNL311C	3.54905	0.752656
AURKB	YNL314W	1.35982	0.573709
AURKB	YNL316C	1.80183	0.0170908
AURKB	YNL317W	1.15442	1.78824
AURKB	YNL318C	1.05821	-0.451073
AURKB	YNL319W	0.873612	-0.453465
AURKB	YNL321W	0.977614	-1.22647
AURKB	YNL322C	0.634409	-0.529373
AURKB	YNL326C	0.109202	-1.62834
AURKB	YNL327W	3.69725	1.1356
AURKB	YNL332W	0.663009	-0.521999
AURKB	YNL333W	1.02701	-0.529881
AURKB	YNL334C	0.0130002	-0.868535
AURKB	YNL335W	1.31822	-0.368753
AURKB	YNL336W	3.41645	0.275003
AURKB	YNL338W	0.00260004	-1.26722
AURKB	YNL339C	2.95364	0.97501
AURKB	YOL008W	0.176802	-0.332611
AURKB	YOL011W	0.00260004	-1.41992
AURKB	YOL012C	0.0520007	-0.727615
AURKB	YOL013C	2.09823	0.469294
AURKB	YOL014W	1.30002	-0.410908
AURKB	YOL015W	0.985414	1.01121
AURKB	YOL016C	0.572008	-0.897401
AURKB	YOL019W	1.41442	0.942928
AURKB	YOL024W	0.00260004	-0.658941
AURKB	YOL027C	0.377005	-0.23188
AURKB	YOL028C	0.782611	0.016991
AURKB	YOL029C	0.00520007	-1.2712
AURKB	YOL030W	4.14706	2.60062
AURKB	YOL031C	0.301604	-0.921834
AURKB	YOL032W	1.46382	0.898173
AURKB	YOL035C	0.330205	-0.934468
AURKB	YOL036W	0.148202	-1.27051
AURKB	YOL037C	0.0572008	-1.50678
AURKB	YOL041C	1.68742	1.84813
AURKB	YOL042W	0.00260004	-0.930167
AURKB	YOL043C	0.00520007	-1.3758
AURKB	YOL044W	0.676009	2.98723
AURKB	YOL045W	0.262604	-1.30092
AURKB	YOL046C	0.322405	-0.981445
AURKB	YOL047C	0.499207	-0.76005
AURKB	YOL052C	0.218403	-0.605808
AURKB	YOL053C-A	0.00520007	-0.95586
AURKB	YOL055C	0.00260004	-1.43321
AURKB	YOL056W	0.00780011	-0.966867
AURKB	YOL057W	1.44302	0.499855
AURKB	YOL058W	1.14922	-0.631694
AURKB	YOL059W	0.366605	-0.581569
AURKB	YOL060C	0.145602	-0.794772
AURKB	YOL061W	1.22982	-0.0795661
AURKB	YOL062C	0.213203	-1.09322
AURKB	YOL063C	0.00260004	-1.2648
AURKB	YOL067C	0.00260004	-0.928727
AURKB	YOL068C	0.647409	0.527216
AURKB	YOL070C	0.993214	-0.0664197
AURKB	YOL071W	0.127402	-1.32795
AURKB	YOL072W	0.868412	1.54449
AURKB	YOL075C	2.26983	1.13667
AURKB	YOL079W	1.10242	-0.0572112
AURKB	YOL080C	0.00260004	-1.2097
AURKB	YOL082W	0.213203	-1.15205
AURKB	YOL083W	1.09462	1.24327
AURKB	YOL084W	3.13824	1.06084
AURKB	YOL085C	3.47625	0.962382
AURKB	YOR002W	0.122202	-1.17848
AURKB	YOR003W	0.520007	-1.17274
AURKB	YOR005C	1.68742	-0.551374
AURKB	YOR007C	3.62185	0.631658
AURKB	YOR009W	1.66922	-0.172714
AURKB	YOR010C	2.96404	-0.23569
AURKB	YOR011W	2.31143	-0.181668
AURKB	YOR012W	5.06747	1.11063
AURKB	YOR013W	0.374405	-0.998032
AURKB	YOR015W	5.31707	2.40447
AURKB	YOR016C	2.14243	1.39514
AURKB	YOR017W	0.184603	-0.918773
AURKB	YOR018W	0.790411	-0.317255
AURKB	YOR021C	2.55324	1.12698
AURKB	YOR022C	1.78623	-0.253698
AURKB	YOR023C	1.82783	0.0720216
AURKB	YOR024W	0.618809	-0.669624
AURKB	YOR025W	0.215803	-1.10212
AURKB	YOR027W	0.101401	-1.26481
AURKB	YOR028C	0.330205	-1.14667
AURKB	YOR029W	3.75445	1.78314
AURKB	YOR030W	2.35823	0.798579
AURKB	YOR031W	1.44302	0.644673
AURKB	YOR032C	0.179403	-1.31394
AURKB	YOR033C	0.202803	-0.435137
AURKB	YOR034C	0.0546008	-0.998238
AURKB	YOR037W	5.35607	1.66233
AURKB	YOR040W	0.910013	-0.690661
AURKB	YOR041C	0.413406	-0.681044
AURKB	YOR042W	1.20642	0.0316425
AURKB	YOR043W	5.58488	1.23666
AURKB	YOR044W	0.00260004	-1.11879
AURKB	YOR045W	2.18923	1.29889
AURKB	YOR047C	2.63124	1.21078
AURKB	YOR049C	1.44822	1.22919
AURKB	YOR050C	5.31707	2.7343
AURKB	YOR052C	6.43249	3.67714
AURKB	YOR053W	2.89644	2.12029
AURKB	YOR054C	1.80703	1.26448
AURKB	YOR055W	2.93024	1.30104
AURKB	YOR058C	0.288604	-0.986779
AURKB	YOR059C	7.96131	1.63997
AURKB	YOR061W	0.496607	-1.06838
AURKB	YOR062C	1.21942	-0.623057
AURKB	YOR064C	0.808611	-0.289425
AURKB	YOR067C	3.64785	1.63456
AURKB	YOR068C	4.05346	0.349401
AURKB	YOR069W	0.327605	-1.21897
AURKB	YOR070C	0.946413	0.119027
AURKB	YOR071C	0.868412	-0.603122
AURKB	YOR072W	1.62762	-0.00465138
AURKB	YOR079C	3.16164	2.5494
AURKB	YOR081C	1.90063	1.00508
AURKB	YOR082C	1.27142	-0.413911
AURKB	YOR083W	0.889212	-1.40332
AURKB	YOR084W	0.69421	-0.619699
AURKB	YOR085W	1.59642	2.12642
AURKB	YOR086C	0.169002	-0.735022
AURKB	YOR087W	1.54442	1.00522
AURKB	YOR088W	6.54689	4.53832
AURKB	YOR089C	0.0494007	-0.835156
AURKB	YOR090C	3.19804	0.401808
AURKB	YOR091W	0.499207	-0.401706
AURKB	YOR092W	1.66922	1.29347
AURKB	YOR093C	2.18143	0.29314
AURKB	YOR094W	2.16063	1.37352
AURKB	YOR097C	0.00260004	-1.34747
AURKB	YOR099W	0.475807	-0.048201
AURKB	YOR100C	0.187203	-0.893634
AURKB	YOR101W	0.210603	-0.839525
AURKB	YOR105W	0.156002	-0.937729
AURKB	YOR107W	0.00260004	-1.17736
AURKB	YOR108W	0.202803	-0.646403
AURKB	YOR111W	3.38265	2.10893
AURKB	YOR112W	0.949013	0.504605
AURKB	YOR113W	0.00520007	-1.25057
AURKB	YOR114W	0.754011	-0.328846
AURKB	YOR115C	1.96563	1.02567
AURKB	YOR118W	5.86048	2.6156
AURKB	YOR121C	0.270404	-0.0410844
AURKB	YOR124C	0.132602	-1.62888
AURKB	YOR125C	1.01661	-0.473763
AURKB	YOR126C	1.92923	-0.446086
AURKB	YOR129C	0.117002	-0.60763
AURKB	YOR130C	1.92923	2.82975
AURKB	YOR131C	0.200203	-0.851787
AURKB	YOR132W	0.00780011	-1.55097
AURKB	YOR134W	0.00260004	-1.14884
AURKB	YOR137C	0.171602	-0.467706
AURKB	YOR140W	1.35462	0.164072
AURKB	YOR141C	0.00260004	-0.842035
AURKB	YOR142W	1.05301	-0.799955
AURKB	YOR144C	0.111802	-0.547598
AURKB	YOR149C	0.260004	0.707107
AURKB	YOR152C	5.73308	-0.132864
AURKB	YOR153W	3.60365	1.59154
AURKB	YOR155C	3.47885	-0.554815
AURKB	YOR156C	5.00247	1.12049
AURKB	YOR161C	2.51164	-0.7293
AURKB	YOR162C	0.104001	-0.773208
AURKB	YOR163W	0.202803	-1.02419
AURKB	YOR165W	0.00520007	-1.101
AURKB	YOR167C	0.223603	-0.207013
AURKB	YOR170W	0.0338005	-0.187099
AURKB	YOR172W	1.21682	0.899824
AURKB	YOR177C	1.37282	0.188596
AURKB	YOR178C	1.43262	1.25524
AURKB	YOR180C	1.53922	0.0957707
AURKB	YOR182C	0.0104001	-0.709015
AURKB	YOR188W	1.59122	-1.42127
AURKB	YOR191W	0.491407	-0.177971
AURKB	YOR192C	0.00260004	-1.20594
AURKB	YOR193W	1.94743	1.35813
AURKB	YOR195W	0.509607	-0.23775
AURKB	YOR197W	2.04883	1.51399
AURKB	YOR200W	0.00520007	-0.998094
AURKB	YOR202W	0.70721	-0.107697
AURKB	YOR207C	1.50282	1.15468
AURKB	YOR213C	0.379605	0.000362581
AURKB	YOR216C	0.132602	-0.822776
AURKB	YOR219C	0.314604	-0.882848
AURKB	YOR220W	1.44562	2.41145
AURKB	YOR222W	0.00520007	-1.49572
AURKB	YOR223W	0.0650009	-1.38414
AURKB	YOR228C	0.611009	-0.302281
AURKB	YOR229W	0.917813	0.396682
AURKB	YOR230W	0.405606	-0.534714
AURKB	YOR231W	0.150802	-0.809684
AURKB	YOR233W	1.17002	0.633338
AURKB	YOR239W	0.0104001	-1.22723
AURKB	YOR240W	0.0598008	-0.981829
AURKB	YOR243C	0.163802	-1.01466
AURKB	YOR245C	0.0754011	-0.914576
AURKB	YOR246C	0.260004	-0.183894
AURKB	YOR248W	1.32082	1.70604
AURKB	YOR251C	0.00260004	-0.76659
AURKB	YOR252W	0.114402	-0.92003
AURKB	YOR253W	0.130002	-1.85616
AURKB	YOR255W	0.00260004	-1.53237
AURKB	YOR263C	2.34523	2.2646
AURKB	YOR264W	0.69681	-0.444734
AURKB	YOR265W	1.30002	-0.149387
AURKB	YOR267C	0.275604	-0.460398
AURKB	YOR268C	0.676009	-0.489272
AURKB	YOR271C	0.301604	-0.723658
AURKB	YOR273C	2.34523	1.15789
AURKB	YOR274W	0.00780011	-0.996973
AURKB	YOR275C	2.12423	1.29591
AURKB	YOR276W	0.0416006	-1.09653
AURKB	YOR277C	0.111802	-0.70264
AURKB	YOR279C	1.51322	1.74632
AURKB	YOR280C	1.32602	0.138291
AURKB	YOR283W	2.49603	0.0117871
AURKB	YOR285W	3.97026	2.06591
AURKB	YOR286W	1.76282	1.42026
AURKB	YOR288C	1.63542	-0.0955326
AURKB	YOR289W	1.21942	-0.713931
AURKB	YOR291W	2.47263	2.02732
AURKB	YOR296W	0.00520007	-1.64052
AURKB	YOR297C	6.03988	1.34839
AURKB	YOR298W	4.92447	1.22525
AURKB	YOR300W	6.8901	1.12451
AURKB	YOR301W	0.00260004	-0.912583
AURKB	YOR304C-A	0.163802	-1.1206
AURKB	YOR304W	1.25322	-0.524104
AURKB	YOR306C	0.907413	-1.81394
AURKB	YOR307C	1.97343	1.68628
AURKB	YOR308C	0.449806	0.869095
AURKB	YOR313C	8.34612	3.84328
AURKB	YOR314W	0.104001	-0.816254
AURKB	YOR315W	0.176802	-0.975918
AURKB	YOR316C	2.86264	0.047388
AURKB	YOR317W	5.79808	3.12358
AURKB	YOR318C	1.20642	-0.401343
AURKB	YOR320C	0.270404	-1.61333
AURKB	YOR321W	1.04261	-1.28383
AURKB	YOR324C	7.1397	4.11811
AURKB	YOR325W	5.51728	-0.307404
AURKB	YOR327C	3.22405	0.94841
AURKB	YOR328W	4.25626	0.909658
AURKB	YOR333C	3.43985	-0.521654
AURKB	YOR334W	2.93544	0.0222048
AURKB	YOR337W	2.98224	0.614081
AURKB	YOR338W	1.13362	-0.0189315
AURKB	YOR339C	1.43002	-0.56681
AURKB	YOR342C	0.0104001	-1.6741
AURKB	YOR343C	6.9447	3.07532
AURKB	YOR344C	2.35043	2.30744
AURKB	YOR345C	3.52305	-0.44942
AURKB	YOR346W	3.87145	1.81825
AURKB	YOR347C	2.02023	0.0918501
AURKB	YOR350C	0.00520007	-0.978373
AURKB	YOR351C	0.410806	-0.603664
AURKB	YOR354C	0.189803	-1.23201
AURKB	YOR355W	1.60422	3.33304
AURKB	YOR357C	0.187203	-1.0789
AURKB	YOR358W	0.0182003	-0.9255
AURKB	YOR359W	0.109202	-0.9593
AURKB	YOR360C	0.538208	1.63448
AURKB	YOR364W	0.236603	-0.315295
AURKB	YOR365C	1.38582	0.258791
AURKB	YOR366W	1.06081	-0.450213
AURKB	YOR367W	2.86004	3.60395
[truncated: 163 more rows]

## Sheet: BRD4
Table S2. Barcode counts of yeast deletion strains obtained from high-throughput sequencing.
Query (Kinase)	Subject (yeast gene deletion)	Normalized barcode counts	Z-score
BRD4	YAL002W	2.6925	3.5857
BRD4	YAL004W	1.22798	0.430516
BRD4	YAL005C	1.95269	-0.0290606
BRD4	YAL007C	0.46301	-0.55403
BRD4	YAL008W	0.523402	0.14325
BRD4	YAL009W	0.271766	-0.124109
BRD4	YAL011W	0.070458	-0.812139
BRD4	YAL012W	4.68546	0.931946
BRD4	YAL014C	0.936085	0.0501418
BRD4	YAL015C	1.70609	0.225422
BRD4	YAL017W	0.951183	0.188742
BRD4	YAL018C	1.20785	0.678448
BRD4	YAL019W	0.427781	-0.413465
BRD4	YAL021C	0.211374	-0.132936
BRD4	YAL022C	0.684449	-0.47157
BRD4	YAL023C	0.105687	-0.514749
BRD4	YAL027W	0.94615	0.119164
BRD4	YAL028W	1.67589	0.131727
BRD4	YAL029C	1.62053	0.978861
BRD4	YAL030W	0.749874	-0.355457
BRD4	YAL034C	0.29693	-0.71611
BRD4	YAL036C	1.01158	-0.244338
BRD4	YAL037W	1.19779	0.655907
BRD4	YAL039C	0.291897	-0.78233
BRD4	YAL042W	0.488173	-0.464262
BRD4	YAL043C-	0.729743	1.24741
BRD4	YAL044C	0.0805234	-0.631951
BRD4	YAL045C	1.72119	1.89073
BRD4	YAL046C	0.070458	-1.21903
BRD4	YAL048C	0.216407	-0.648879
BRD4	YAL049C	0.40765	-0.0663365
BRD4	YAL051W	0.377453	-0.929189
BRD4	YAL053W	0.926019	-0.520111
BRD4	YAL055W	1.34373	0.543126
BRD4	YAL056W	1.26321	0.70266
BRD4	YAL058W	1.02667	0.604208
BRD4	YAL059W	0.382486	0.258305
BRD4	YAL060W	1.65576	0.678077
BRD4	YAL061W	1.10216	-0.0772073
BRD4	YAL062W	1.35883	-0.128842
BRD4	YAL065C	1.03171	0.175288
BRD4	YAL066W	0.145949	-1.04105
BRD4	YAL067C	1.11223	-0.184286
BRD4	YAL068C	2.461	0.798947
BRD4	YAR014C	0.16608	-0.452247
BRD4	YAR020C	0.468042	-0.77651
BRD4	YAR023C	1.50981	2.0452
BRD4	YAR027W	1.25315	1.4013
BRD4	YAR028W	2.01812	0.462417
BRD4	YAR029W	2.02315	1.18217
BRD4	YAR030C	0.619024	-0.318048
BRD4	YAR031W	0.810267	-0.411376
BRD4	YAR035W	0.875692	0.0803789
BRD4	YAR037W	1.79668	1.23359
BRD4	YAR040C	0.870659	0.0253564
BRD4	YAR042W	1.79165	1.49459
BRD4	YAR043C	0.457977	0.15804
BRD4	YAR044W	0.306995	-0.44937
BRD4	YAR047C	0.699547	-0.536258
BRD4	YBL001C	0.24157	-0.280718
BRD4	YBL002W	0.306995	-0.316746
BRD4	YBL003C	0.367388	-0.26276
BRD4	YBL005W	0.619024	-0.543295
BRD4	YBL006C	0.226472	1.13768
BRD4	YBL008W	0.0301963	-0.838317
BRD4	YBL009W	0.619024	-0.036131
BRD4	YBL010C	1.12229	0.396049
BRD4	YBL011W	1.47458	0.531421
BRD4	YBL012C	0.699547	-0.328272
BRD4	YBL013W	0.548566	-0.458907
BRD4	YBL015W	0.664318	-0.58199
BRD4	YBL017C	0.332159	0.131188
BRD4	YBL019W	0.412682	-0.58548
BRD4	YBL022C	0.236537	0.0424065
BRD4	YBL024W	0.18621	-0.478768
BRD4	YBL028C	0.246603	-0.464359
BRD4	YBL029W	0.0805234	-0.817748
BRD4	YBL031W	0.0855561	-0.410893
BRD4	YBL032W	0.145949	-0.292385
BRD4	YBL036C	0.256668	-0.661902
BRD4	YBL037W	0.0452944	-1.17541
BRD4	YBL038W	0.0100654	-0.776507
BRD4	YBL039C	0.0503271	0.707107
BRD4	YBL042C	0.387519	0.0465789
BRD4	YBL043W	0.332159	-0.219625
BRD4	YBL044W	0.150981	-0.517698
BRD4	YBL045C	1.28334	0.267731
BRD4	YBL046W	0.221439	-0.0273012
BRD4	YBL047C	0.226472	-0.2707
BRD4	YBL048W	0.442879	-0.117667
BRD4	YBL049W	0.770005	-0.421898
BRD4	YBL051C	0.0654253	-0.638817
BRD4	YBL052C	0.256668	-0.259572
BRD4	YBL053W	0.634122	-0.662056
BRD4	YBL054W	0.855561	2.25154
BRD4	YBL055C	0.578762	-0.294185
BRD4	YBL056W	1.67589	1.99648
BRD4	YBL057C	1.13236	0.572439
BRD4	YBL059W	2.04328	0.372807
BRD4	YBL060W	0.75994	0.519375
BRD4	YBL061C	0.795169	-0.332554
BRD4	YBL062W	1.42426	1.01597
BRD4	YBL063W	0.75994	-0.453211
BRD4	YBL064C	0.729743	-0.518534
BRD4	YBL066C	1.26824	-0.319125
BRD4	YBL067C	1.03171	-0.13054
BRD4	YBL068W	1.09713	-0.323981
BRD4	YBL069W	1.83694	0.407416
BRD4	YBL070C	0.951183	-0.46727
BRD4	YBL071C	0.0956215	-0.573812
BRD4	YBL072C	0.11072	-0.545792
BRD4	YBL075C	1.84701	0.813959
BRD4	YBL078C	1.25818	-0.261698
BRD4	YBL080C	0.387519	-0.484681
BRD4	YBL081W	0.256668	-0.724409
BRD4	YBL082C	0.543533	-0.18733
BRD4	YBL083C	0.115752	-0.54565
BRD4	YBL085W	0.70458	-0.588603
BRD4	YBL086C	1.3387	0.00734096
BRD4	YBL087C	0.140916	-0.0233917
BRD4	YBL088C	1.69602	1.27025
BRD4	YBL089W	1.50981	0.768847
BRD4	YBL090W	0.125818	-0.67082
BRD4	YBL091C	0.709612	-0.414164
BRD4	YBL094C	0.513337	-0.300793
BRD4	YBL095W	3.87519	1.25702
BRD4	YBL096C	0.674383	-0.852068
BRD4	YBL098W	2.35531	0.905014
BRD4	YBL099W	0.377453	0.116797
BRD4	YBL100C	0.29693	0.111811
BRD4	YBL101C	42.8636	2.50845
BRD4	YBL102W	1.40916	-0.333137
BRD4	YBL104C	0.457977	-0.648313
BRD4	YBL106C	0.357323	-0.381979
BRD4	YBL107C	1.75642	-0.19141
BRD4	YBR001C	1.34877	-0.6963
BRD4	YBR005W	1.94766	1.10963
BRD4	YBR006W	0.573729	0.148226
BRD4	YBR007C	2.55159	0.683009
BRD4	YBR008C	0.427781	-1.84853
BRD4	YBR009C	0.161047	-0.461004
BRD4	YBR010W	0.357323	-0.856993
BRD4	YBR012C	1.82184	0.0624537
BRD4	YBR013C	2.29995	1.02755
BRD4	YBR014C	0.422748	-0.696559
BRD4	YBR015C	0.18621	-0.557603
BRD4	YBR016W	1.65576	-0.194212
BRD4	YBR018C	1.74132	-0.225006
BRD4	YBR019C	0.382486	-0.22682
BRD4	YBR020W	0.800201	-0.66501
BRD4	YBR022W	1.48465	-0.165069
BRD4	YBR023C	0.0452944	-1.0948
BRD4	YBR024W	0.900856	-0.293817
BRD4	YBR025C	0.206341	-0.697915
BRD4	YBR027C	0.246603	-0.693528
BRD4	YBR028C	0.236537	-1.08079
BRD4	YBR030W	0.130851	-1.12448
BRD4	YBR032W	0.654253	0.282311
BRD4	YBR033W	1.65073	0.779206
BRD4	YBR034C	0.734776	-0.690938
BRD4	YBR037C	0.478108	0.0193668
BRD4	YBR040W	0.115752	-0.878666
BRD4	YBR041W	0.00503271	-0.971979
BRD4	YBR042C	0.468042	-0.401093
BRD4	YBR043C	0.78007	-0.664949
BRD4	YBR045C	1.50478	-0.381457
BRD4	YBR046C	2.02818	-0.300854
BRD4	YBR047W	1.22295	-0.188973
BRD4	YBR050C	3.93558	-0.0403426
BRD4	YBR051W	1.57021	-0.434631
BRD4	YBR052C	0.719678	-1.31086
BRD4	YBR053C	0.724711	-0.844413
BRD4	YBR054W	1.03674	-0.240751
BRD4	YBR056W	0.0150981	-0.846423
BRD4	YBR057C	2.00302	0.331184
BRD4	YBR058C	2.26472	1.72961
BRD4	YBR059C	1.59537	-0.675086
BRD4	YBR062C	0.412682	-0.642083
BRD4	YBR063C	1.27831	-0.0791731
BRD4	YBR064W	1.91243	-0.38348
BRD4	YBR065C	1.76648	0.213973
BRD4	YBR066C	1.99295	0.152737
BRD4	YBR067C	1.11223	-0.0337855
BRD4	YBR068C	1.22295	-0.384535
BRD4	YBR069C	0.790136	-0.0222261
BRD4	YBR071W	1.9225	0.340553
BRD4	YBR072W	0.961248	-0.751601
BRD4	YBR073W	1.41419	0.991969
BRD4	YBR074W	3.94061	1.37306
BRD4	YBR075W	1.43432	0.250364
BRD4	YBR077C	0.0100654	-1.06396
BRD4	YBR083W	1.3538	0.402511
BRD4	YBR084W	1.11726	-0.396383
BRD4	YBR087W	0.00503271	-0.659944
BRD4	YBR090C-A	0.639155	-0.339935
BRD4	YBR092C	1.70106	1.28434
BRD4	YBR093C	1.3538	0.424915
BRD4	YBR094W	0.377453	-0.499074
BRD4	YBR098W	0.181178	-0.449773
BRD4	YBR099C	0.0855561	-0.155294
BRD4	YBR100W	0.70458	0.167541
BRD4	YBR101C	1.48465	1.20448
BRD4	YBR104W	0.915954	-0.247911
BRD4	YBR105C	2.22446	2.1124
BRD4	YBR107C	0.543533	0.442986
BRD4	YBR113W	0.0905888	-0.779191
BRD4	YBR114W	0.0754907	-0.642293
BRD4	YBR116C	0.427781	-0.406665
BRD4	YBR119W	0.226472	-0.382239
BRD4	YBR120C	1.57021	0.130973
BRD4	YBR128C	1.66583	0.940505
BRD4	YBR129C	0.447911	-0.399094
BRD4	YBR130C	0.412682	-0.642093
BRD4	YBR131W	0.16608	-0.826107
BRD4	YBR134W	0.11072	-0.881766
BRD4	YBR137W	1.29844	-0.0137918
BRD4	YBR138C	0.815299	-0.223288
BRD4	YBR139W	1.56517	0.131047
BRD4	YBR141C	2.22446	0.959569
BRD4	YBR144C	0.322094	-0.592957
BRD4	YBR145W	1.45445	0.566133
BRD4	YBR147W	4.45395	1.34055
BRD4	YBR148W	3.2612	1.23188
BRD4	YBR150C	0.608958	0.0844088
BRD4	YBR151W	0.895823	-0.0909214
BRD4	YBR157C	0.830398	0.0982956
BRD4	YBR158W	0.503271	0.225164
BRD4	YBR161W	1.09713	0.45495
BRD4	YBR162W-A	1.13236	0.308283
BRD4	YBR164C	1.08707	0.47971
BRD4	YBR169C	1.82687	0.224234
BRD4	YBR170C	1.1072	0.790292
BRD4	YBR172C	1.3538	0.187235
BRD4	YBR174C	0.488173	0.675643
BRD4	YBR176W	1.16759	0.501431
BRD4	YBR177C	0.850528	0.0854659
BRD4	YBR178W	1.08203	0.941609
BRD4	YBR180W	1.03171	1.26097
BRD4	YBR182C	0.775038	0.597337
BRD4	YBR183W	0.770005	-0.479555
BRD4	YBR184W	0.553598	-0.350092
BRD4	YBR185C	1.47962	-0.225797
BRD4	YBR186W	0.795169	-0.0246899
BRD4	YBR187W	0.0201309	-0.57698
BRD4	YBR188C	0.70458	0.357864
BRD4	YBR197C	0.362355	-0.641973
BRD4	YBR199W	1.17262	0.156913
BRD4	YBR203W	0.719678	-0.785932
BRD4	YBR204C	0.588827	-0.950686
BRD4	YBR205W	3.49774	1.69171
BRD4	YBR206W	1.98289	0.156528
BRD4	YBR207W	1.55511	0.431485
BRD4	YBR208C	1.88223	1.36596
BRD4	YBR210W	0.216407	-0.421676
BRD4	YBR212W	1.34373	0.340935
BRD4	YBR214W	1.27831	1.20496
BRD4	YBR215W	0.0150981	-1.03267
BRD4	YBR216C	0.764972	-0.725015
BRD4	YBR217W	0.895823	-0.446287
BRD4	YBR218C	2.28485	0.726842
BRD4	YBR219C	0.583795	-0.566233
BRD4	YBR220C	1.9225	0.100868
BRD4	YBR222C	1.31857	0.574338
BRD4	YBR223C	1.6155	1.72183
BRD4	YBR224W	1.06694	-0.173258
BRD4	YBR225W	0.533468	-0.670988
BRD4	YBR226C	0.553598	-1.20457
BRD4	YBR227C	2.65224	1.5707
BRD4	YBR228W	1.78158	-0.0549708
BRD4	YBR229C	4.47911	2.02747
BRD4	YBR230C	4.01107	0.94149
BRD4	YBR231C	0.94615	0.514426
BRD4	YBR232C	2.44087	0.596397
BRD4	YBR233W	1.14243	0.377939
BRD4	YBR235W	0.437846	-0.596247
BRD4	YBR238C	0.659285	-0.609242
BRD4	YBR239C	0.880725	-0.730981
BRD4	YBR240C	2.58178	0.883605
BRD4	YBR241C	1.22798	-0.558202
BRD4	YBR242W	0.724711	-0.656585
BRD4	YBR244W	5.94363	0.225544
BRD4	YBR245C	1.38903	-0.0699505
BRD4	YBR246W	0.598893	-0.835475
BRD4	YBR248C	1.59537	0.190284
BRD4	YBR249C	0.860594	0.154254
BRD4	YBR250W	2.64721	0.70369
BRD4	YBR251W	0.0654253	-0.754525
BRD4	YBR255W	0.644187	-0.551052
BRD4	YBR258C	1.05687	-0.231807
BRD4	YBR259W	1.54001	-0.445237
BRD4	YBR260C	1.62053	0.255166
BRD4	YBR261C	0.885757	-0.553348
BRD4	YBR262C	2.58681	0.645392
BRD4	YBR263W	1.9074	0.236417
BRD4	YBR264C	0.744841	-0.601644
BRD4	YCL001W	0.206341	-0.809902
BRD4	YCL005W	0.135883	-0.555437
BRD4	YCL006C	2.10367	-1.11724
BRD4	YCL008C	1.32864	0.852604
BRD4	YCL009C	0.40765	-0.238654
BRD4	YCL010C	0.317061	-0.170155
BRD4	YCL011C	0.150981	-0.626214
BRD4	YCL012W	1.28837	-0.156106
BRD4	YCL013W	0.362355	-0.93909
BRD4	YCL014W	0.115752	-0.934333
BRD4	YCL022C	2.02315	0.306881
BRD4	YCL023C	4.25767	-0.413267
BRD4	YCL024W	0.0654253	-1.22416
BRD4	YCL026C	0.322094	-0.63485
BRD4	YCL027W	0.442879	-0.490533
BRD4	YCL028W	0.0452944	-0.954697
BRD4	YCL033C	0.301963	-0.496041
BRD4	YCL035C	0.961248	0.925096
BRD4	YCL036W	0.100654	-0.595819
BRD4	YCL037C	0.140916	-0.458102
BRD4	YCL038C	2.54655	0.126108
BRD4	YCL039W	1.00151	0.535315
BRD4	YCL044C	0.659285	0.636425
BRD4	YCL045C	0.699547	-0.253398
BRD4	YCL046W	0.191243	-0.889148
BRD4	YCL047C	0.397584	-0.165759
BRD4	YCL048W	0.125818	-0.565769
BRD4	YCL049C	1.08203	-0.225598
BRD4	YCL050C	0.523402	-0.0800402
BRD4	YCL051W	0.176145	-0.885929
BRD4	YCL056C	0.281832	-0.632755
BRD4	YCL057W	0.392552	-0.412089
BRD4	YCL062W	0.35229	-0.700459
BRD4	YCL063W	0.0503271	-0.530333
BRD4	YCL064C	0.0603926	-1.31585
BRD4	YCL069W	0.75994	-0.147158
BRD4	YCL073C	2.46603	0.739612
BRD4	YCL074W	2.08354	-0.789722
BRD4	YCL075W	4.47911	-0.212246
BRD4	YCL076W	1.92753	-0.946695
BRD4	YCR004C	0.815299	1.06192
BRD4	YCR005C	1.02667	0.127702
BRD4	YCR006C	0.0754907	-1.12592
BRD4	YCR007C	0.150981	-0.398068
BRD4	YCR008W	0.825365	0.0626658
BRD4	YCR010C	0.342224	-0.861776
BRD4	YCR011C	0.508304	-0.313508
BRD4	YCR015C	0.679416	-0.295266
BRD4	YCR016W	0.301963	-0.450859
BRD4	YCR017C	0.271766	-0.30106
BRD4	YCR018C	3.25113	1.10806
BRD4	YCR019W	2.02818	0.465319
BRD4	YCR020C	0.442879	0.220878
BRD4	YCR020C-A	0.135883	-0.614808
BRD4	YCR021C	1.15752	-0.168959
BRD4	YCR022C	1.01661	0.794057
BRD4	YCR023C	0.739809	-0.111881
BRD4	YDL001W	0.125818	-0.477034
BRD4	YDL002C	0.00503271	-1.01384
BRD4	YDL009C	0.543533	-0.384095
BRD4	YDL010W	0.0754907	-0.527609
BRD4	YDL011C	0.40765	-0.328758
BRD4	YDL012C	1.11726	0.0760163
BRD4	YDL018C	0.337192	-0.710058
BRD4	YDL019C	0.0603926	-0.923375
BRD4	YDL020C	0.0553598	-0.874481
BRD4	YDL021W	0.961248	1.10167
BRD4	YDL022W	0.100654	-0.787375
BRD4	YDL023C	0.18621	-0.48836
BRD4	YDL024C	0.810267	-0.0427864
BRD4	YDL026W	1.35883	1.05631
BRD4	YDL027C	0.488173	-0.0574736
BRD4	YDL032W	0.0201309	-0.91381
BRD4	YDL033C	0.0402617	-0.567669
BRD4	YDL034W	1.04177	-0.0919661
BRD4	YDL035C	0.694514	-0.108604
BRD4	YDL036C	0.926019	-0.246708
BRD4	YDL037C	0.181178	-0.439765
BRD4	YDL038C	0.528435	-0.115836
BRD4	YDL039C	1.68093	0.089664
BRD4	YDL041W	0.367388	1.10378
BRD4	YDL046W	0.996477	0.831728
BRD4	YDL048C	0.669351	1.00728
BRD4	YDL049C	0.196276	-0.874388
BRD4	YDL050C	0.367388	0.0452488
BRD4	YDL051W	1.26824	1.5249
BRD4	YDL052C	0.11072	-1.01894
BRD4	YDL053C	0.216407	-0.83485
BRD4	YDL056W	0.0452944	-0.603051
BRD4	YDL059C	0.191243	0.560824
BRD4	YDL061C	0.0553598	-0.463141
BRD4	YDL062W	0.11072	-0.265162
BRD4	YDL063C	0.0754907	-0.619727
BRD4	YDL065C	0.161047	-0.559719
BRD4	YDL067C	0.905888	1.30252
BRD4	YDL068W	0.83543	2.12693
BRD4	YDL069C	0.533468	0.176279
BRD4	YDL070W	0.312028	-0.502644
BRD4	YDL071C	0.0553598	-0.785892
BRD4	YDL072C	0.775038	0.559451
BRD4	YDL074C	0.00503271	-0.709262
BRD4	YDL076C	0.64922	0.563367
BRD4	YDL077C	0.815299	0.442125
BRD4	YDL078C	0.598893	-0.394151
BRD4	YDL079C	0.568697	-0.641627
BRD4	YDL080C	0.251636	-0.668859
BRD4	YDL085W	0.29693	-0.481099
BRD4	YDL086W	1.03171	0.311503
BRD4	YDL088C	0.0855561	-0.872155
BRD4	YDL089W	0.724711	0.701658
BRD4	YDL091C	0.40765	-0.286014
BRD4	YDL093W	0.830398	-0.39308
BRD4	YDL094C	0.0402617	-0.959827
BRD4	YDL095W	0.402617	0.0311928
BRD4	YDL096C	0.689482	-0.130301
BRD4	YDL099W	0.29693	-0.512898
BRD4	YDL100C	0.140916	-0.520685
BRD4	YDL101C	0.0805234	-0.75041
BRD4	YDL104C	1.04177	-0.269488
BRD4	YDL106C	0.150981	0.0673273
BRD4	YDL107W	0.140916	-0.565376
BRD4	YDL109C	1.84701	-0.420823
BRD4	YDL110C	0.322094	-0.733201
BRD4	YDL112W	2.60695	0.462129
BRD4	YDL113C	3.21087	0.571331
BRD4	YDL114W	1.51988	-0.538899
BRD4	YDL118W	0.64922	-0.383748
BRD4	YDL121C	0.724711	-1.18519
BRD4	YDL122W	0.533468	-0.69741
BRD4	YDL123W	1.68093	-0.0016537
BRD4	YDL124W	1.06694	0.0621072
BRD4	YDL125C	0.5385	-0.0957109
BRD4	YDL127W	1.14243	1.04707
BRD4	YDL129W	1.69602	-0.165367
BRD4	YDL130W	0.281832	0.314575
BRD4	YDL131W	0.775038	-0.424037
BRD4	YDL133W	0.29693	-0.802716
BRD4	YDL134C	0.679416	-0.617473
BRD4	YDL134C-A	0.754907	-0.957057
BRD4	YDL135C	0.931052	-0.46553
BRD4	YDL136W	0.256668	-0.696475
BRD4	YDL137W	4.80121	0.51548
BRD4	YDL138W	4.3231	-0.162187
BRD4	YDL142C	3.20584	-0.233508
BRD4	YDL146W	0.785103	-0.413952
BRD4	YDL149W	3.30146	0.863769
BRD4	YDL154W	8.71666	0.325662
BRD4	YDL155W	3.13538	-1.01824
BRD4	YDL156W	5.4152	-0.578177
BRD4	YDL157C	3.40715	0.0611319
BRD4	YDL161W	2.6925	-0.876279
BRD4	YDL162C	0.875692	1.14095
BRD4	YDL167C	2.64217	-0.703518
BRD4	YDL168W	2.36537	-0.766628
BRD4	YDL169C	3.13538	-0.221027
BRD4	YDL170W	4.24258	-0.0955757
BRD4	YDL171C	3.24107	-0.640872
BRD4	YDL172C	2.14897	1.89435
BRD4	YDL173W	1.01158	0.452004
BRD4	YDL174C	4.73578	-0.467466
BRD4	YDL176W	10.8002	0.281921
BRD4	YDL177C	7.10116	0.139343
BRD4	YDL178W	2.03825	-1.09856
BRD4	YDL179W	3.63865	0.626881
BRD4	YDL180W	6.76397	-0.456568
BRD4	YDL182W	4.36336	-0.533445
BRD4	YDL183C	0.976346	-0.5293
BRD4	YDL184C	3.44741	-0.737897
BRD4	YDL186W	3.07499	-0.628762
BRD4	YDL187C	4.41872	-0.234152
BRD4	YDL188C	0.573729	-1.22288
BRD4	YDL189W	4.82134	0.374647
BRD4	YDL190C	1.76145	-0.323993
BRD4	YDL194W	0.0251636	-0.965627
BRD4	YDL197C	1.6306	0.485821
BRD4	YDL199C	1.47962	-0.748608
BRD4	YDL200C	3.47257	0.28377
BRD4	YDL201W	1.6608	-0.263137
BRD4	YDL202W	0.0956215	-0.477308
BRD4	YDL203C	1.8621	-0.846266
BRD4	YDL204W	1.6608	-0.909615
BRD4	YDL206W	1.84701	-0.72154
BRD4	YDL210W	1.14746	-1.28749
BRD4	YDL211C	1.65073	0.689509
BRD4	YDL213C	0.181178	-0.406039
BRD4	YDL215C	3.29139	0.103144
BRD4	YDL216C	0.00503271	-0.833337
BRD4	YDL218W	3.01963	-0.00370191
BRD4	YDL219W	1.63563	-0.467106
BRD4	YDL222C	6.39658	0.642748
BRD4	YDL223C	0.754907	-0.973619
BRD4	YDL224C	1.03171	-0.97153
BRD4	YDL225W	1.17262	-0.307354
BRD4	YDL226C	0.337192	-0.39582
BRD4	YDL227C	2.17413	-1.23825
BRD4	YDL229W	0.266734	-0.982675
BRD4	YDL230W	2.09361	-0.497103
BRD4	YDL231C	2.97433	-0.130958
BRD4	YDL233W	4.02617	0.21903
BRD4	YDL234C	1.50478	-0.154506
BRD4	YDL236W	9.4313	2.663
BRD4	YDL237W	3.65878	2.3354
BRD4	YDL238C	0.231505	-1.34798
BRD4	YDL239C	0.820332	-1.1045
BRD4	YDL240W	1.30347	-0.463815
BRD4	YDL241W	1.33367	-0.105482
BRD4	YDL242W	2.38047	-0.40902
BRD4	YDL243C	1.01158	-1.311
BRD4	YDR001C	1.56014	-0.544116
BRD4	YDR003W	0.624056	-1.38035
BRD4	YDR005C	0.679416	-0.180353
BRD4	YDR006C	3.11022	-0.519156
BRD4	YDR007W	0.261701	0.152808
BRD4	YDR008C	0.105687	0.600812
BRD4	YDR009W	2.76296	-0.269596
BRD4	YDR010C	3.60342	0.557036
BRD4	YDR011W	1.80171	-0.330177
BRD4	YDR014W	0.276799	-0.641494
BRD4	YDR015C	1.68596	0.0771098
BRD4	YDR018C	2.9391	0.561226
BRD4	YDR019C	1.22798	-1.21993
BRD4	YDR020C	0.357323	0.00186323
BRD4	YDR022C	2.47106	-0.579257
BRD4	YDR026C	3.02466	0.157515
BRD4	YDR028C	1.98792	0.0702011
BRD4	YDR029W	5.99899	1.58628
BRD4	YDR030C	2.78309	-0.138427
BRD4	YDR031W	3.90539	0.757325
BRD4	YDR032C	1.59034	0.0577376
BRD4	YDR033W	3.17061	0.515246
BRD4	YDR034C	0.382486	-0.712433
BRD4	YDR035W	3.93055	0.527033
BRD4	YDR036C	1.28334	-0.504811
BRD4	YDR042C	1.59034	-0.569779
BRD4	YDR043C	2.05335	0.457335
BRD4	YDR046C	1.61047	-1.00207
BRD4	YDR048C	0.29693	-0.578366
BRD4	YDR049W	0.825365	1.84351
BRD4	YDR051C	0.94615	0.24449
BRD4	YDR055W	1.21288	0.600415
BRD4	YDR056C	0.941117	-0.537533
BRD4	YDR057W	0.749874	0.484386
BRD4	YDR059C	1.33367	-0.266188
BRD4	YDR061W	0.674383	-0.835929
BRD4	YDR063W	0.498239	-0.892659
BRD4	YDR066C	2.36034	0.565972
BRD4	YDR067C	6.85455	0.859598
BRD4	YDR068W	3.19074	1.12859
BRD4	YDR069C	0.035229	-0.525586
BRD4	YDR070C	0.24157	-0.770092
BRD4	YDR072C	0.724711	0.235074
BRD4	YDR073W	1.29341	-0.428567
BRD4	YDR075W	0.588827	0.0409878
BRD4	YDR076W	0.00503271	-0.855245
BRD4	YDR077W	1.75138	0.894808
BRD4	YDR078C	0.815299	0.1319
BRD4	YDR080W	2.93407	2.44214
BRD4	YDR084C	0.46301	-0.624838
BRD4	YDR085C	0.281832	-1.11947
BRD4	YDR089W	5.64167	1.91033
BRD4	YDR090C	1.82184	0.135901
BRD4	YDR093W	0.749874	-0.327399
BRD4	YDR094W	0.327126	-0.961427
BRD4	YDR095C	0.568697	-1.12243
BRD4	YDR096W	0.48314	-0.876952
BRD4	YDR097C	1.18269	-0.510297
BRD4	YDR098C	1.62557	0.845682
BRD4	YDR099W	0.548566	-0.901471
BRD4	YDR100W	1.29341	0.187824
BRD4	YDR101C	0.105687	-0.352554
BRD4	YDR102C	0.920986	-0.0335508
BRD4	YDR104C	1.59537	0.491238
BRD4	YDR105C	0.0201309	-0.989362
BRD4	YDR107C	2.39557	0.811245
BRD4	YDR108W	1.39406	0.387625
BRD4	YDR109C	1.04177	-0.092374
BRD4	YDR110W	3.06492	2.03493
BRD4	YDR111C	0.905888	0.217353
BRD4	YDR112W	2.05838	-0.100358
BRD4	YDR115W	0.156014	-0.0687895
BRD4	YDR116C	0.130851	-0.541285
BRD4	YDR117C	0.699547	-0.303952
BRD4	YDR119W	2.29995	0.0900802
BRD4	YDR121W	0.473075	-0.246505
BRD4	YDR122W	3.16558	0.789021
BRD4	YDR123C	2.61701	-0.436224
BRD4	YDR124W	3.20584	1.04192
BRD4	YDR125C	0.261701	0.0363104
BRD4	YDR128W	0.558631	-0.792252
BRD4	YDR130C	0.920986	-0.303443
BRD4	YDR131C	1.11726	-0.0287037
BRD4	YDR132C	0.976346	0.222692
BRD4	YDR133C	1.1072	-0.661319
BRD4	YDR134C	2.67237	0.19712
BRD4	YDR135C	1.26824	0.0329949
BRD4	YDR136C	0.115752	-0.981062
BRD4	YDR139C	1.44439	0.272226
BRD4	YDR142C	0.0251636	-1.20383
BRD4	YDR143C	1.78661	0.0200058
BRD4	YDR144C	1.05687	-0.00299966
BRD4	YDR146C	2.6925	0.812146
BRD4	YDR148C	0.785103	-0.0859646
BRD4	YDR149C	0.140916	0.165894
BRD4	YDR150W	0.145949	0.00354487
BRD4	YDR151C	1.05687	0.249956
BRD4	YDR152W	1.67086	0.229211
BRD4	YDR153C	6.48213	1.86087
BRD4	YDR154C	0.276799	-0.323331
BRD4	YDR155C	0.0100654	-0.753137
BRD4	YDR156W	0.246603	-0.228648
BRD4	YDR157W	0.140916	-0.814146
BRD4	YDR162C	0.664318	-0.03956
BRD4	YDR163W	0.0100654	-1.02391
BRD4	YDR169C	1.45445	0.52313
BRD4	YDR171W	1.08203	-0.896207
BRD4	YDR175C	0.035229	0.707107
BRD4	YDR178W	0.528435	-0.323534
BRD4	YDR181C	0.181178	-0.954382
BRD4	YDR183W	0.397584	-0.426802
BRD4	YDR184C	0.0754907	-1.08449
BRD4	YDR185C	0.860594	0.0562555
BRD4	YDR186C	0.377453	0.278347
BRD4	YDR191W	1.01158	-0.36946
BRD4	YDR192C	0.543533	-0.687802
BRD4	YDR193W	0.161047	-0.847842
BRD4	YDR194C	0.161047	-0.262449
BRD4	YDR197W	0.140916	-0.790722
BRD4	YDR198C	0.387519	-0.636047
BRD4	YDR202C	0.191243	-0.973468
BRD4	YDR203W	0.347257	-0.119835
BRD4	YDR204W	0.291897	0.120761
BRD4	YDR205W	1.41922	-0.415364
BRD4	YDR206W	0.629089	-0.180424
BRD4	YDR209C	0.327126	-0.252361
BRD4	YDR210W	1.8923	0.329372
BRD4	YDR213W	0.16608	-0.881102
BRD4	YDR214W	0.357323	-1.07062
BRD4	YDR216W	0.744841	-0.0848073
BRD4	YDR217C	0.0855561	-1.12665
BRD4	YDR218C	0.417715	-0.3684
BRD4	YDR219C	0.0503271	-1.02403
BRD4	YDR220C	0.332159	-0.459688
BRD4	YDR221W	0.342224	-1.01573
BRD4	YDR222W	0.40765	-0.467416
BRD4	YDR223W	0.473075	-1.02988
BRD4	YDR225W	0.0855561	-0.486958
BRD4	YDR229W	1.17262	0.132552
BRD4	YDR230W	0.457977	-0.0525602
BRD4	YDR231C	0.256668	-0.421715
BRD4	YDR233C	1.00151	-0.509028
BRD4	YDR237W	0.0201309	-0.812686
BRD4	YDR239C	0.694514	-0.810066
BRD4	YDR244W	0.206341	-0.898824
BRD4	YDR247W	0.191243	-1.09997
BRD4	YDR248C	0.18621	-0.876087
BRD4	YDR249C	1.05687	0.7379
BRD4	YDR250C	0.583795	-0.0921767
BRD4	YDR251W	0.775038	-0.195628
BRD4	YDR252W	0.880725	0.0812119
BRD4	YDR253C	0.0805234	-0.626887
BRD4	YDR254W	0.387519	0.45864
BRD4	YDR255C	0.0654253	0.0233122
BRD4	YDR256C	0.941117	-0.0126056
BRD4	YDR257C	0.367388	-0.738447
BRD4	YDR258C	0.860594	-0.201981
BRD4	YDR259C	0.734776	-0.268909
BRD4	YDR260C	0.0553598	-1.14153
BRD4	YDR261C	0.362355	-0.807912
BRD4	YDR262W	0.070458	-0.716912
BRD4	YDR263C	0.855561	-0.316203
BRD4	YDR265W	0.0301963	-1.22711
BRD4	YDR266C	0.120785	-0.601473
BRD4	YDR269C	1.71112	-0.0921806
BRD4	YDR271C	0.0553598	-1.09168
BRD4	YDR272W	0.820332	-0.0784628
BRD4	YDR273W	1.24811	0.433771
BRD4	YDR274C	0.171112	-0.464994
BRD4	YDR275W	0.563664	-0.0947434
BRD4	YDR276C	0.226472	0.0509131
BRD4	YDR277C	0.256668	-0.0451316
BRD4	YDR278C	0.161047	-0.589737
BRD4	YDR279W	0.150981	-0.299071
BRD4	YDR282C	0.035229	-0.974354
BRD4	YDR283C	0.0654253	-0.457137
BRD4	YDR284C	0.140916	-0.439283
BRD4	YDR285W	0.0301963	-0.336183
BRD4	YDR286C	0.488173	-0.215891
BRD4	YDR287W	0.382486	0.400744
BRD4	YDR290W	1.49975	-0.34619
BRD4	YDR291W	0.437846	-0.313664
BRD4	YDR293C	0.125818	-0.00786018
BRD4	YDR294C	0.629089	-0.179935
BRD4	YDR295C	0.286865	-0.379464
BRD4	YDR297W	1.56517	-0.175703
BRD4	YDR304C	0.286865	-0.622293
BRD4	YDR305C	0.306995	-0.322575
BRD4	YDR306C	0.145949	-0.622833
BRD4	YDR307W	0.357323	-0.482214
BRD4	YDR309C	0.674383	0.162022
BRD4	YDR310C	0.291897	-0.263042
BRD4	YDR312W	0.181178	-0.875489
BRD4	YDR313C	0.503271	-0.210865
BRD4	YDR314C	0.865627	0.209622
BRD4	YDR316W	0.276799	-0.31934
BRD4	YDR317W	0.236537	-0.296707
BRD4	YDR319C	0.29693	-0.569325
BRD4	YDR321W	0.880725	0.722596
BRD4	YDR322W	0.130851	-0.711083
BRD4	YDR323C	0.0100654	-0.129238
BRD4	YDR326C	2.29995	1.61433
BRD4	YDR329C	0.508304	0.351661
BRD4	YDR330W	0.306995	-0.211909
BRD4	YDR332W	0.0654253	-0.887505
BRD4	YDR333C	0.161047	-0.919797
BRD4	YDR334W	0.251636	0.635669
BRD4	YDR336W	0.171112	0.431299
BRD4	YDR337W	0.0503271	-0.563846
BRD4	YEL001C	0.885757	-0.415481
BRD4	YEL004W	1.96276	0.765721
BRD4	YEL005C	0.216407	-0.600506
BRD4	YEL006W	0.0956215	-1.00273
BRD4	YEL008W	0.0301963	-1.0634
BRD4	YEL009C	0.120785	-0.439849
BRD4	YEL010W	0.885757	-0.298128
BRD4	YEL011W	2.34524	0.37091
BRD4	YEL012W	2.32511	0.801975
BRD4	YEL013W	0.266734	-0.765439
BRD4	YEL014C	1.03171	-0.20198
BRD4	YEL016C	1.46955	0.233745
BRD4	YEL017C-A	0.679416	-0.145659
BRD4	YEL017W	0.291897	-0.36056
BRD4	YEL018W	0.266734	-0.690251
BRD4	YEL020C	0.40765	-0.0849889
BRD4	YEL023C	0.64922	-0.270517
BRD4	YEL025C	1.077	-0.106776
BRD4	YEL028W	2.09864	0.246283
BRD4	YEL030W	0.976346	-0.0298361
BRD4	YEL031W	0.161047	-0.243532
BRD4	YEL037C	0.805234	0.135289
BRD4	YEL038W	0.971314	-0.192281
BRD4	YEL039C	0.432813	-0.434164
BRD4	YEL040W	1.21288	-0.234958
BRD4	YEL041W	1.76145	-0.341177
BRD4	YEL042W	1.39406	0.458451
BRD4	YEL043W	0.387519	-0.720968
BRD4	YEL047C	1.48465	-0.76414
BRD4	YEL048C	3.61349	1.5322
BRD4	YEL049W	3.89532	1.53425
BRD4	YEL052W	1.94263	0.00509509
BRD4	YEL053C	0.508304	-0.796123
BRD4	YEL054C	0.191243	0.687507
BRD4	YEL056W	1.17765	-0.145475
BRD4	YEL057C	1.41922	0.151176
BRD4	YEL059W	1.31857	-0.45209
BRD4	YEL060C	1.74132	1.54072
BRD4	YEL062W	2.05335	0.284737
BRD4	YEL063C	1.28334	-0.0153608
BRD4	YEL064C	0.130851	-0.54504
BRD4	YEL065W	1.75138	0.301747
BRD4	YEL066W	1.93256	0.436714
BRD4	YEL067C	3.13538	0.445315
BRD4	YEL068C	1.92753	-0.268662
BRD4	YEL071W	1.76648	-0.141298
BRD4	YER001W	1.48465	-0.350278
BRD4	YER002W	0.0654253	-0.494738
BRD4	YER004W	0.457977	-0.244328
BRD4	YER005W	0.613991	-0.261572
BRD4	YER007C-A	1.02667	0.11044
BRD4	YER007W	0.246603	-0.568836
BRD4	YER011W	0.709612	-0.241695
BRD4	YER019C-A	0.417715	-0.81795
BRD4	YER020W	1.13739	-0.575239
BRD4	YER024W	0.926019	-0.59454
BRD4	YER028C	1.23805	-0.302985
BRD4	YER030W	0.709612	-0.903947
BRD4	YER031C	0.981379	0.325049
BRD4	YER032W	0.568697	-0.0382668
BRD4	YER033C	0.563664	-0.15736
BRD4	YER034W	0.306995	-0.843505
BRD4	YER038W-A	0.870659	-0.271488
BRD4	YER039C	0.246603	-0.243949
BRD4	YER040W	0.156014	-0.286293
BRD4	YER041W	0.583795	0.101527
BRD4	YER042W	1.05184	0.010337
BRD4	YER044C-A	2.52139	0.456773
BRD4	YER045C	1.46452	0.0487261
BRD4	YER046W	3.94061	0.53395
BRD4	YER046W-A	0.679416	0.475282
BRD4	YER048C	0.201309	-0.764119
BRD4	YER049W	0.966281	-0.399114
BRD4	YER053C	0.613991	-0.440698
BRD4	YER055C	0.493206	-1.06938
BRD4	YER056C	0.29693	-0.965484
BRD4	YER056C-A	0.493206	-0.425672
BRD4	YER057C	1.30851	-0.407859
BRD4	YER058W	0.971314	1.08201
BRD4	YER059W	1.71616	-0.431015
BRD4	YER060W	2.20936	0.181902
BRD4	YER060W-A	0.709612	-0.619735
BRD4	YER062C	0.24157	-0.776266
BRD4	YER063W	2.4308	0.305123
BRD4	YER064C	3.18067	1.17183
BRD4	YER065C	0.327126	-1.12886
BRD4	YER066C-A	0.0553598	-0.431411
BRD4	YER066W	0.689482	-1.14526
BRD4	YER067C-A	1.31354	-0.216312
BRD4	YER067W	1.077	-0.139615
BRD4	YER071C	0.976346	-0.36935
BRD4	YER072W	1.17765	0.685522
BRD4	YER073W	1.81178	-0.357285
BRD4	YER075C	1.61047	0.388985
BRD4	YER078C	0.115752	-0.768576
BRD4	YER079W	1.78158	0.804066
BRD4	YER080W	0.301963	-1.03243
BRD4	YER081W	0.457977	-0.71694
BRD4	YER084W	0.699547	0.914836
BRD4	YER085C	0.981379	-0.431425
BRD4	YER087C-A	0.503271	-0.744553
BRD4	YER088C	1.48968	1.21095
BRD4	YER089C	1.62557	0.690949
BRD4	YER092W	0.231505	-0.355121
BRD4	YER093C-A	3.95571	2.54022
BRD4	YER096W	2.80825	0.902394
BRD4	YER097W	0.810267	-0.475851
BRD4	YER098W	2.1389	-0.52377
BRD4	YER101C	0.342224	-0.245609
BRD4	YER103W	0.48314	-0.546921
BRD4	YER106W	1.97786	0.696608
BRD4	YER108C	0.301963	-1.0141
BRD4	YER109C	1.24308	-0.0340945
BRD4	YER110C	0.0805234	-0.600313
BRD4	YER113C	0.437846	-0.192081
BRD4	YER114C	1.00654	1.02475
BRD4	YER115C	2.55662	1.96794
BRD4	YER118C	0.478108	-0.267655
BRD4	YER119C	0.48314	-0.489577
BRD4	YER119C-A	0.251636	-0.231686
BRD4	YER120W	0.830398	1.56322
BRD4	YER121W	0.48314	-0.57905
BRD4	YER123W	1.19779	0.795491
BRD4	YER124C	0.412682	-0.518101
BRD4	YER128W	0.724711	-0.503219
BRD4	YER129W	1.76648	1.50166
BRD4	YER130C	0.790136	1.06342
BRD4	YER132C	0.392552	-0.670069
BRD4	YER134C	0.317061	-0.937988
BRD4	YER135C	0.035229	-0.668824
BRD4	YER137C	0.16608	-1.27153
BRD4	YER138C-A	0.437846	-0.488564
BRD4	YER139C	0.29693	-0.2168
BRD4	YER140W	0.317061	-1.41744
BRD4	YER141W	0.699547	-0.425702
BRD4	YER142C	0.775038	0.18258
BRD4	YER145C-A	1.63563	2.9031
BRD4	YER146W	0.840463	0.22545
BRD4	YER148W	0.286865	-0.874152
BRD4	YER153C	1.11726	0.16405
BRD4	YER156C	0.236537	-0.516199
BRD4	YER157W	0.764972	-0.416987
BRD4	YER158C	0.920986	-0.23269
BRD4	YER160C	2.11374	0.581353
BRD4	YER163C	0.337192	-0.856168
BRD4	YER165C-A	0.840463	0.590713
BRD4	YER166W	0.382486	0.0963563
BRD4	YER167W	1.02164	0.015145
BRD4	YER168C	0.246603	-0.697659
BRD4	YER171W	0.865627	-0.623106
BRD4	YER172C	0.503271	-0.983552
BRD4	YER172C-A	0.468042	-0.707877
BRD4	YER173W	1.22295	-0.158066
BRD4	YER174C	0.895823	-0.168724
BRD4	YER175C	0.533468	-0.603224
BRD4	YER176W	0.709612	-0.178424
BRD4	YER177W	0.674383	-0.175446
BRD4	YER178W	0.493206	-0.680456
BRD4	YER180C	0.281832	-0.447403
BRD4	YER181C	0.216407	-0.727288
BRD4	YER182W	1.26321	1.02318
BRD4	YER183C	0.679416	0.463794
BRD4	YER184C	1.44942	0.711504
BRD4	YER185W	1.47962	-0.202627
BRD4	YER186C	0.231505	-1.12294
BRD4	YER187W	0.825365	-0.0245225
BRD4	YHL002W	4.96225	0.624582
BRD4	YHL003C	3.01963	-0.568023
BRD4	YHL005C	0.115752	-0.904027
BRD4	YHL006C	0.5385	-0.426301
BRD4	YHL007C	0.40765	0.537894
BRD4	YHL008C	0.543533	-0.862164
BRD4	YHL009C	0.171112	-0.457113
BRD4	YHL010C	2.34021	0.467269
BRD4	YHL012W	0.387519	-0.678958
BRD4	YHL013C	1.11726	1.23005
BRD4	YHL014C	3.62355	1.00155
BRD4	YHL016C	0.18621	-0.598391
BRD4	YHL017W	1.00151	-0.0976933
BRD4	YHL019C	0.0301963	-1.08843
BRD4	YHL020C	0.181178	0.0780858
BRD4	YHL021C	0.422748	-0.28701
BRD4	YHL022C	1.42426	1.1474
BRD4	YHL023C	0.684449	-0.362486
BRD4	YHL024W	1.10216	-0.369183
BRD4	YHL026C	1.40916	1.7693
BRD4	YHL027W	0.64922	-0.473322
BRD4	YHL028W	0.161047	-1.00284
BRD4	YHL029C	5.385	1.29106
BRD4	YHL030W	0.694514	-0.423666
BRD4	YHL032C	0.437846	-0.543611
BRD4	YHL034C	0.367388	-0.968184
BRD4	YHL035C	0.0553598	-0.810889
BRD4	YHL036W	0.271766	-0.610941
BRD4	YHL037C	0.447911	-0.374128
BRD4	YHL038C	1.18269	1.01046
BRD4	YHL039W	1.82687	0.323145
BRD4	YHL040C	0.719678	-0.195055
BRD4	YHL041W	1.44439	0.0961039
BRD4	YHL042W	0.367388	-1.28331
BRD4	YHL043W	1.91746	0.0810895
BRD4	YHL044W	0.70458	0.904677
BRD4	YHL045W	1.41922	0.123714
BRD4	YHL046C	0.281832	-0.354122
BRD4	YHL047C	1.1072	-0.306837
BRD4	YHR001W-A	1.24308	0.504619
BRD4	YHR003C	1.65073	-0.896647
BRD4	YHR004C	0.24157	0.171257
BRD4	YHR006W	3.16054	0.174965
BRD4	YHR009C	2.50629	0.553219
BRD4	YHR014W	0.0754907	-0.881748
BRD4	YHR015W	1.83694	0.146015
BRD4	YHR016C	2.88374	0.535852
BRD4	YHR017W	1.05184	0.632206
BRD4	YHR018C	0.845496	-0.576158
BRD4	YHR022C	0.795169	-0.592476
BRD4	YHR028C	2.82335	0.72236
BRD4	YHR031C	0.301963	0.0922094
BRD4	YHR032W	1.00151	-0.129744
BRD4	YHR033W	2.02818	-0.0209916
BRD4	YHR035W	2.91394	0.227884
BRD4	YHR037W	0.749874	-0.440267
BRD4	YHR043C	1.59034	0.886493
BRD4	YHR044C	0.40765	-0.715393
BRD4	YHR045W	2.48616	0.543103
BRD4	YHR047C	0.961248	0.0721257
BRD4	YHR049C-A	1.59537	1.00524
BRD4	YHR049W	1.55008	0.845883
BRD4	YHR051W	0.447911	0.562706
BRD4	YHR057C	0.679416	-0.257558
BRD4	YHR061C	0.543533	-0.501701
BRD4	YHR067W	0.00503271	-0.521166
BRD4	YHR073W	0.694514	-0.580077
BRD4	YHR075C	0.810267	0.171607
BRD4	YHR076W	0.100654	-0.848615
BRD4	YHR077C	0.533468	-0.0165905
BRD4	YHR078W	1.62557	0.910217
BRD4	YHR079C	0.749874	-0.26098
BRD4	YHR080C	0.920986	-0.20444
BRD4	YHR082C	1.07197	0.0683526
BRD4	YHR086W	1.79165	0.11353
BRD4	YHR087W	0.473075	-0.472448
BRD4	YHR091C	0.256668	1.56941
BRD4	YHR092C	0.583795	-0.345782
BRD4	YHR093W	0.770005	-0.534284
BRD4	YHR094C	1.43432	0.264242
BRD4	YHR095W	0.16608	-1.18097
BRD4	YHR096C	0.337192	-0.492038
BRD4	YHR097C	0.739809	-0.202316
BRD4	YHR103W	0.347257	-0.176384
BRD4	YHR104W	0.583795	0.0517245
BRD4	YHR105W	1.41922	1.50522
BRD4	YHR106W	0.689482	-0.418653
BRD4	YHR108W	0.583795	1.3493
BRD4	YHR109W	0.387519	-0.863353
BRD4	YHR110W	1.39909	1.07436
BRD4	YHR112C	0.583795	0.164641
BRD4	YHR113W	1.03674	0.264031
BRD4	YHR114W	1.75138	0.132966
BRD4	YHR115C	0.412682	-0.380543
BRD4	YHR116W	0.301963	-0.299999
BRD4	YHR117W	0.956215	0.607691
BRD4	YHR120W	0.00503271	-0.707107
BRD4	YHR121W	1.14746	-0.513538
BRD4	YHR123W	0.191243	-0.868753
BRD4	YHR124W	1.20282	0.559626
BRD4	YHR125W	0.619024	-0.211402
BRD4	YHR126C	0.850528	-0.610209
BRD4	YHR127W	4.30297	0.734445
BRD4	YHR130C	1.29844	0.246674
BRD4	YHR131C	1.49975	-0.319511
BRD4	YHR132C	2.6623	1.44211
BRD4	YHR133C	0.931052	1.31878
BRD4	YHR135C	0.40765	-0.229116
BRD4	YHR136C	0.70458	-0.0437083
BRD4	YHR137W	0.639155	-0.281712
BRD4	YHR138C	1.19779	-0.589251
BRD4	YHR139C	0.493206	-0.579691
BRD4	YHR139C-A	0.94615	-0.237028
BRD4	YHR140W	0.5385	-0.708401
BRD4	YHR142W	0.100654	-0.757577
BRD4	YHR143W	0.442879	-0.472564
BRD4	YHR146W	1.28334	0.0910115
BRD4	YHR150W	0.714645	0.146238
BRD4	YHR151C	0.46301	-0.10289
BRD4	YHR152W	0.850528	-0.290965
BRD4	YHR153C	0.613991	-0.200102
BRD4	YHR155W	1.6004	-0.188369
BRD4	YHR156C	0.00503271	-1.43386
BRD4	YHR157W	0.140916	-0.900336
BRD4	YHR158C	1.15752	0.158427
BRD4	YHR159W	0.845496	0.486926
BRD4	YHR160C	0.508304	-0.590868
BRD4	YHR161C	0.18621	-1.10479
BRD4	YHR162W	0.956215	-0.050876
BRD4	YHR167W	0.0452944	-0.689299
BRD4	YHR171W	1.30851	0.261579
BRD4	YHR176W	0.226472	-0.181135
BRD4	YHR177W	0.991444	-0.214575
BRD4	YHR179W	1.79165	2.52303
BRD4	YHR180W	1.50981	-0.714906
BRD4	YHR181W	0.744841	-0.604984
BRD4	YHR182W	0.966281	0.0186226
BRD4	YHR184W	1.16759	-0.0645181
BRD4	YHR185C	1.00654	-0.792224
BRD4	YHR189W	0.694514	-0.261915
BRD4	YHR193C	0.161047	-0.473906
BRD4	YHR195W	0.40765	-0.12305
BRD4	YHR198C	1.42426	0.478291
BRD4	YHR199C	0.367388	-0.694208
BRD4	YHR200W	0.00503271	-0.586136
BRD4	YHR202W	0.29693	-0.823515
BRD4	YHR203C	0.256668	-0.354676
BRD4	YHR204W	0.100654	-0.552953
BRD4	YHR206W	0.880725	-0.0108485
BRD4	YHR207C	0.528435	0.0249351
BRD4	YHR209W	1.01158	-0.137631
BRD4	YHR210C	0.261701	-0.718196
BRD4	YIL001W	0.473075	-0.556656
BRD4	YIL002C	0.910921	0.253971
BRD4	YIL005W	0.629089	0.327322
BRD4	YIL006W	1.57021	-0.675108
BRD4	YIL007C	1.02164	-0.729928
BRD4	YIL009W	2.32511	-0.641135
BRD4	YIL010W	2.9844	-0.874512
BRD4	YIL011W	1.60544	0.966378
BRD4	YIL012W	0.382486	-0.46209
BRD4	YIL013C	0.810267	-0.508377
BRD4	YIL014W	0.291897	-1.00601
BRD4	YIL015W	0.78007	-0.21647
BRD4	YIL016W	0.181178	-0.533684
BRD4	YIL020C	0.46301	0.132752
BRD4	YIL023C	0.619024	-0.0203318
BRD4	YIL027C	0.0100654	-0.620528
BRD4	YIL028W	0.437846	-0.443951
BRD4	YIL029C	0.644187	-0.080278
BRD4	YIL032C	0.442879	-0.388258
BRD4	YIL034C	0.100654	0.707107
BRD4	YIL036W	0.422748	-0.363264
BRD4	YIL038C	21.6356	1.65252
BRD4	YIL041W	0.770005	0.523027
BRD4	YIL042C	0.855561	-0.0301499
BRD4	YIL043C	0.347257	1.03947
BRD4	YIL044C	0.271766	-0.269075
BRD4	YIL045W	1.40916	1.38292
BRD4	YIL050W	1.63563	-0.0476106
BRD4	YIL052C	0.634122	-0.521688
BRD4	YIL053W	0.24157	-0.476057
BRD4	YIL054W	1.35883	0.121295
BRD4	YIL055C	3.57323	1.30858
BRD4	YIL056W	5.31958	0.481683
BRD4	YIL057C	0.442879	0.0917484
BRD4	YIL059C	2.63714	-0.138535
BRD4	YIL060W	0.00503271	-1.02945
BRD4	YIL064W	0.724711	-0.260924
BRD4	YIL065C	0.744841	-0.121025
BRD4	YIL066C	7.29743	2.04148
BRD4	YIL067C	0.468042	-0.273091
BRD4	YIL069C	0.412682	-0.0852607
BRD4	YIL070C	1.75642	-0.392909
BRD4	YIL071C	2.6774	-0.0700014
BRD4	YIL072W	0.105687	-0.859193
BRD4	YIL073C	2.97433	0.974652
BRD4	YIL074C	3.48264	-0.335165
BRD4	YIL076W	1.00151	0.0138574
BRD4	YIL077C	1.62053	1.11861
BRD4	YIL079C	0.140916	-0.724966
BRD4	YIL084C	1.15249	0.325795
BRD4	YIL085C	2.77806	0.539363
BRD4	YIL086C	0.815299	-0.613604
BRD4	YIL087C	2.33518	0.068863
BRD4	YIL088C	2.16407	-0.0792287
BRD4	YIL089W	4.67539	0.0638954
BRD4	YIL090W	0.775038	-0.00909416
BRD4	YIL092W	3.98088	0.656177
BRD4	YIL094C	0.699547	0.392452
BRD4	YIL095W	1.22295	0.432704
BRD4	YIL096C	1.02667	0.119982
BRD4	YIL098C	2.17413	0.484498
BRD4	YIL099W	1.23301	-0.528415
BRD4	YIL101C	0.578762	-0.333581
BRD4	YIL102C	0.613991	-0.069086
BRD4	YIL105C	1.18772	0.253508
BRD4	YIL107C	1.20785	0.507538
BRD4	YIL108W	1.78661	-0.3046
BRD4	YIL110W	0.125818	-0.27186
BRD4	YIL111W	1.82687	1.09378
BRD4	YIL112W	0.0805234	-1.0099
BRD4	YIL113W	0.0805234	-1.06518
BRD4	YIL114C	1.87217	-0.106463
BRD4	YIL116W	0.070458	-0.377165
BRD4	YIL117C	1.40916	0.00210288
BRD4	YIL119C	0.855561	0.211659
BRD4	YIL120W	4.88173	-0.271934
BRD4	YIL121W	0.070458	-0.954082
BRD4	YIL123W	0.181178	-0.368824
BRD4	YIL124W	1.85707	0.340865
BRD4	YIL125W	0.754907	0.445369
BRD4	YIL130W	2.53649	0.727168
BRD4	YIL131C	1.54001	0.228928
BRD4	YIL132C	1.34373	-0.414774
BRD4	YIL133C	0.140916	-0.333992
BRD4	YIL135C	5.92854	2.73399
BRD4	YIL136W	0.850528	0.532347
BRD4	YIL137C	2.00302	0.0371147
BRD4	YIL138C	1.46452	0.610033
BRD4	YIL140W	1.39406	-0.358156
BRD4	YIL141W	2.25969	0.443408
BRD4	YIL145C	0.674383	-1.09952
BRD4	YIL146C	2.35028	-0.148268
BRD4	YIL148W	0.161047	-0.143449
BRD4	YIL152W	0.885757	-1.17934
BRD4	YIL153W	0.0402617	-0.588964
BRD4	YIL154C	0.337192	0.559285
BRD4	YIL155C	0.70458	-0.793606
BRD4	YIL156W	1.9074	-0.105652
BRD4	YIL157C	1.64066	0.588629
BRD4	YIL158W	0.452944	-0.428764
BRD4	YIL159W	1.44439	0.0827476
BRD4	YIL160C	1.3689	0.0860096
BRD4	YIL161W	0.986412	-0.394095
BRD4	YIL162W	1.52491	-0.805318
BRD4	YIL163C	2.85355	0.850742
BRD4	YIL164C	1.20282	-0.236845
BRD4	YIL165C	1.6608	-0.28518
BRD4	YIL166C	0.785103	-0.219957
BRD4	YIL167W	1.30347	-0.416466
BRD4	YIL168W	2.66734	-0.256201
BRD4	YIL170W	1.31857	-1.1985
BRD4	YIL173W	3.77453	0.409033
BRD4	YIR001C	3.57826	0.603418
BRD4	YIR002C	0.59386	-0.847034
BRD4	YIR003W	4.31303	0.557262
BRD4	YIR004W	0.583795	0.243157
BRD4	YIR007W	2.6774	-0.46656
BRD4	YIR013C	3.09009	-0.0827288
BRD4	YIR014W	3.27126	-0.300257
BRD4	YIR016W	8.3392	2.21458
BRD4	YJL004C	0.337192	-0.858054
BRD4	YJL005W	0.312028	-0.110759
BRD4	YJL007C	1.44439	-0.662583
BRD4	YJL012C	2.05335	2.63804
BRD4	YJL013C	1.87217	1.07157
BRD4	YJL016W	2.20433	-0.481351
BRD4	YJL017W	0.845496	-0.369137
BRD4	YJL020C	3.46754	3.04577
BRD4	YJL021C	1.30347	0.33614
BRD4	YJL022W	0.775038	0.67869
BRD4	YJL024C	0.427781	-0.249386
BRD4	YJL027C	2.50629	0.393597
BRD4	YJL030W	2.81329	1.14618
BRD4	YJL036W	0.689482	-1.05713
BRD4	YJL037W	6.27076	0.946541
BRD4	YJL038C	1.54504	-0.69292
BRD4	YJL042W	6.54253	1.2499
BRD4	YJL043W	3.2159	0.297076
BRD4	YJL044C	1.73629	-0.233118
BRD4	YJL045W	3.59336	0.731321
BRD4	YJL047C	0.0905888	-0.497613
BRD4	YJL048C	4.01107	0.711119
BRD4	YJL049W	4.02617	0.336312
BRD4	YJL051W	3.48264	-0.622413
BRD4	YJL052W	0.427781	-0.278854
BRD4	YJL053W	2.16407	1.41581
BRD4	YJL055W	2.03322	0.17236
BRD4	YJL056C	0.0855561	-0.45681
BRD4	YJL057C	1.6004	-0.0810804
BRD4	YJL058C	3.80976	0.0957183
BRD4	YJL060W	4.08656	0.506875
BRD4	YJL064W	2.81329	-0.283868
BRD4	YJL065C	0.905888	-0.772584
BRD4	YJL066C	0.850528	-0.803707
BRD4	YJL067W	1.39909	-0.48131
BRD4	YJL068C	4.10669	0.824351
BRD4	YJL070C	2.56668	-0.128407
BRD4	YJL071W	0.860594	-0.900649
BRD4	YJL073W	2.89884	0.63405
BRD4	YJL077C	2.59185	-0.751985
BRD4	YJL078C	1.70609	-0.232289
BRD4	YJL079C	1.75138	-0.333771
BRD4	YJL080C	0.16608	-0.399888
BRD4	YJL082W	0.78007	-0.967656
BRD4	YJL083W	5.04781	1.11692
BRD4	YJL084C	2.34021	-0.488623
BRD4	YJL089W	2.23452	0.260064
BRD4	YJL092W	0.191243	-0.211133
BRD4	YJL093C	0.503271	-1.54461
BRD4	YJL094C	2.22949	-0.0578705
BRD4	YJL095W	0.533468	-0.412136
BRD4	YJL098W	3.66381	0.419872
BRD4	YJL099W	1.41419	0.0260698
BRD4	YJL100W	3.68898	0.192428
BRD4	YJL101C	1.17765	0.167258
BRD4	YJL103C	1.80171	0.675691
BRD4	YJL105W	0.18621	-1.13424
BRD4	YJL106W	2.69753	-0.499587
BRD4	YJL107C	6.12481	0.606372
BRD4	YJL108C	0.775038	-0.926175
BRD4	YJL110C	2.11877	0.142507
BRD4	YJL112W	2.60191	0.519052
BRD4	YJL116C	1.82184	-0.829318
BRD4	YJL118W	2.47609	-0.238004
BRD4	YJL119C	3.76447	0.111417
BRD4	YJL120W	0.0905888	-0.674919
BRD4	YJL121C	0.206341	0.0914952
BRD4	YJL122W	2.154	-0.426881
BRD4	YJL123C	1.81681	0.333322
BRD4	YJL124C	0.503271	-0.367542
BRD4	YJL126W	1.0921	-0.809329
BRD4	YJL130C	1.10216	0.59156
BRD4	YJL132W	2.64721	0.250708
BRD4	YJL133W	0.468042	-0.642662
BRD4	YJL134W	4.28787	0.158621
BRD4	YJL135W	4.43382	1.11769
BRD4	YJL141C	0.35229	-0.276915
BRD4	YJL142C	1.85204	0.227389
BRD4	YJL144W	0.508304	-0.336012
BRD4	YJL145W	0.78007	-0.164883
BRD4	YJL146W	1.13739	1.06174
BRD4	YJL147C	1.17765	0.294298
BRD4	YJL148W	1.05687	0.870254
BRD4	YJL149W	0.00503271	-0.573468
BRD4	YJL150W	1.67589	0.407664
BRD4	YJL152W	1.03171	-0.196199
BRD4	YJL153C	0.619024	-0.0524374
BRD4	YJL154C	0.749874	0.30266
BRD4	YJL155C	0.558631	0.186136
BRD4	YJL157C	1.1072	-0.0452096
BRD4	YJL158C	1.25818	0.386311
BRD4	YJL159W	0.981379	1.63468
BRD4	YJL162C	0.201309	0.105997
BRD4	YJL164C	0.578762	0.529018
BRD4	YJL166W	0.473075	0.265898
BRD4	YJL168C	0.518369	1.24168
BRD4	YJL169W	0.754907	0.138123
BRD4	YJL170C	1.86714	1.21461
BRD4	YJL171C	1.6608	0.0144819
BRD4	YJL178C	0.417715	-0.432634
BRD4	YJL181W	1.85707	0.453497
BRD4	YJL182C	0.941117	0.0710888
BRD4	YJL185C	0.634122	0.361826
BRD4	YJL186W	0.754907	-0.535328
BRD4	YJL187C	0.800201	-0.528938
BRD4	YJL190C	0.221439	-0.862584
BRD4	YJL193W	0.105687	-0.714823
BRD4	YJL197W	1.04177	0.244456
BRD4	YJL198W	0.523402	-0.180356
BRD4	YJL199C	0.845496	0.548806
BRD4	YJL204C	0.0956215	-0.477428
BRD4	YJL206C-A	0.613991	-0.0270037
BRD4	YJL207C	1.70106	0.524521
BRD4	YJL208C	0.286865	-0.101564
BRD4	YJL209W	0.211374	-0.539861
BRD4	YJL210W	1.71112	0.265752
BRD4	YJL211C	1.55511	-0.212039
BRD4	YJL212C	1.95269	0.1738
BRD4	YJL213W	1.03674	-0.480396
BRD4	YJL214W	1.81178	0.234442
BRD4	YJL215C	2.08858	-0.0256111
BRD4	YJL216C	1.95269	0.598003
BRD4	YJL217W	1.6306	0.826924
BRD4	YJL218W	3.60342	1.87006
BRD4	YJR001W	0.790136	-0.782534
BRD4	YJR003C	0.654253	-0.947042
BRD4	YJR004C	2.9542	0.30269
BRD4	YJR005W	1.30851	0.181075
BRD4	YJR008W	1.68093	1.09608
BRD4	YJR009C	1.01158	-0.833237
BRD4	YJR010W	0.956215	-0.368319
BRD4	YJR011C	0.775038	0.0814482
BRD4	YJR014W	0.966281	-0.221322
BRD4	YJR015W	1.98792	0.265247
BRD4	YJR019C	2.08858	0.100511
BRD4	YJR020W	3.09009	1.06732
BRD4	YJR021C	0.0754907	-1.14417
BRD4	YJR024C	0.89079	-0.0416614
BRD4	YJR025C	0.800201	-0.685778
BRD4	YJR026W	0.130851	-1.14757
BRD4	YJR030C	0.196276	-0.582647
BRD4	YJR031C	1.8772	0.119249
BRD4	YJR034W	0.679416	0.433549
BRD4	YJR035W	2.42073	0.412839
BRD4	YJR036C	1.14746	-0.395539
BRD4	YJR037W	2.63211	-0.154506
BRD4	YJR038C	2.10367	0.219072
BRD4	YJR039W	1.41922	0.802501
BRD4	YJR040W	2.47609	2.05594
BRD4	YJR043C	0.306995	1.06846
BRD4	YJR048W	1.03674	-0.330399
BRD4	YJR049C	0.18621	-0.774252
BRD4	YJR050W	0.634122	0.175943
BRD4	YJR051W	2.38047	-0.374811
BRD4	YJR052W	0.377453	-1.03071
BRD4	YJR053W	0.699547	-0.663426
BRD4	YJR054W	0.790136	-0.33402
BRD4	YJR056C	0.840463	-0.518755
BRD4	YJR058C	0.417715	-1.34028
BRD4	YJR059W	0.301963	-0.49409
BRD4	YJR060W	0.513337	1.19466
BRD4	YJR061W	1.22295	-0.69506
BRD4	YJR062C	1.98289	-0.106867
BRD4	YJR066W	0.392552	-0.546291
BRD4	YJR069C	0.855561	-0.112164
BRD4	YJR070C	0.714645	0.805458
BRD4	YJR073C	0.281832	-0.752914
BRD4	YJR075W	0.528435	-0.318136
BRD4	YJR077C	0.372421	-0.30573
BRD4	YJR078W	2.89381	-0.220551
BRD4	YJR080C	0.689482	-0.493907
BRD4	YJR082C	2.41067	-0.34057
BRD4	YJR083C	1.02164	-0.0895341
BRD4	YJR084W	1.37896	0.164547
BRD4	YJR087W	2.85355	-0.287546
BRD4	YJR088C	0.035229	-0.678241
BRD4	YJR091C	2.94414	0.376183
BRD4	YJR092W	5.75239	2.12831
BRD4	YJR094C	3.13538	-0.232184
BRD4	YJR094W-A	0.563664	-0.327418
BRD4	YJR095W	2.48616	0.501624
BRD4	YJR096W	3.60845	0.15665
BRD4	YJR097W	2.39054	0.411716
BRD4	YJR098C	5.16356	0.873198
BRD4	YJR099W	3.06995	0.639711
BRD4	YJR100C	2.75289	0.0239872
BRD4	YJR102C	0.156014	-0.995342
BRD4	YJR103W	1.13739	0.461012
BRD4	YJR106W	3.23603	1.12001
BRD4	YJR107W	4.96225	1.42196
BRD4	YJR108W	2.90388	2.20268
BRD4	YJR109C	3.99597	0.0777724
BRD4	YJR110W	1.37896	0.148601
BRD4	YJR111C	0.130851	-0.743068
BRD4	YJR115W	1.49472	-0.863234
BRD4	YJR116W	4.00604	0.508795
BRD4	YJR117W	8.94313	1.78065
BRD4	YJR119C	1.33367	-0.854961
BRD4	YJR120W	0.624056	-0.169901
BRD4	YJR124C	1.68093	0.0209491
BRD4	YJR126C	0.327126	-1.00661
BRD4	YJR127C	3.16558	0.991696
BRD4	YJR128W	1.29844	-0.395321
BRD4	YJR129C	2.03322	1.25295
BRD4	YJR130C	2.10871	1.23859
BRD4	YJR131W	3.83493	0.435835
BRD4	YJR133W	2.61701	-0.565736
BRD4	YJR134C	1.9225	0.483113
BRD4	YJR135C	0.478108	-0.11152
BRD4	YJR137C	2.27982	-0.180235
BRD4	YJR140C	0.508304	-0.126383
BRD4	YJR142W	1.55008	0.371741
BRD4	YJR144W	0.18621	-0.818348
BRD4	YJR146W	15.7876	1.34275
BRD4	YJR147W	0.820332	-0.186385
BRD4	YJR148W	4.28787	1.27027
BRD4	YJR149W	1.43936	0.627255
BRD4	YJR150C	2.60695	-0.149342
BRD4	YJR152W	3.04982	0.874408
BRD4	YJR153W	3.70911	0.194994
BRD4	YJR154W	1.73629	0.761147
BRD4	YLL001W	0.206341	-0.187317
BRD4	YLL005C	1.3689	-0.134487
BRD4	YLL007C	7.14142	0.157888
BRD4	YLL009C	1.05184	0.486048
BRD4	YLL010C	1.16759	-0.206874
BRD4	YLL012W	2.02315	0.479845
BRD4	YLL013C	0.936085	0.0893093
BRD4	YLL014W	0.679416	0.0354542
BRD4	YLL015W	0.347257	-0.659175
BRD4	YLL016W	0.785103	-0.333721
BRD4	YLL017W	0.583795	-0.461993
BRD4	YLL019C	1.43432	1.26009
BRD4	YLL020C	0.362355	-0.571353
BRD4	YLL021W	0.271766	-0.304024
BRD4	YLL024C	0.624056	-0.92195
BRD4	YLL026W	1.59537	0.500592
BRD4	YLL028W	0.744841	-0.742908
BRD4	YLL030C	2.77806	0.12666
BRD4	YLL032C	1.08707	-0.418127
BRD4	YLL038C	0.201309	-0.494414
BRD4	YLL039C	0.734776	0.136687
BRD4	YLL041C	0.397584	0.0648254
BRD4	YLL042C	3.55813	0.626931
BRD4	YLL043W	0.498239	-0.141886
BRD4	YLL046C	1.8772	-1.18783
BRD4	YLL047W	2.93407	-0.186872
BRD4	YLL048C	0.956215	-0.740331
BRD4	YLL049W	0.347257	-0.175213
BRD4	YLL051C	2.59185	0.634868
BRD4	YLL052C	0.83543	-1.10765
BRD4	YLL053C	2.93407	0.216652
BRD4	YLL054C	0.986412	-1.07028
BRD4	YLL055W	0.322094	-1.28521
BRD4	YLL056C	0.956215	-0.791996
BRD4	YLL057C	1.24811	-0.880602
BRD4	YLL058W	3.16558	-0.220291
BRD4	YLL059C	0.89079	-0.417403
BRD4	YLL060C	2.36537	-1.05689
BRD4	YLL061W	1.6004	-0.576224
BRD4	YLL062C	1.42426	-0.164336
BRD4	YLL063C	1.1072	0.146163
BRD4	YLR001C	1.29844	-0.679123
BRD4	YLR003C	1.20785	0.106204
BRD4	YLR004C	3.30649	1.31538
BRD4	YLR006C	0.78007	0.0425639
BRD4	YLR011W	2.60191	0.479142
BRD4	YLR012C	2.92904	1.19513
BRD4	YLR013W	1.74132	0.683136
BRD4	YLR014C	0.372421	-0.709666
BRD4	YLR015W	0.558631	-0.24417
BRD4	YLR016C	2.19426	0.785136
BRD4	YLR017W	1.6155	-0.521192
BRD4	YLR018C	0.619024	-0.437096
BRD4	YLR019W	16.5325	2.10437
BRD4	YLR020C	1.82184	0.515706
BRD4	YLR021W	0.140916	-0.226645
BRD4	YLR023C	1.67086	0.941363
BRD4	YLR024C	0.754907	-0.137299
BRD4	YLR025W	0.468042	-0.382451
BRD4	YLR028C	3.58832	1.1841
BRD4	YLR030W	2.58178	0.450827
BRD4	YLR031W	1.94263	1.06017
BRD4	YLR032W	0.135883	-0.640647
BRD4	YLR034C	2.42073	1.01148
BRD4	YLR035C	0.719678	-0.335505
BRD4	YLR036C	0.749874	-0.661626
BRD4	YLR037C	0.734776	-0.70354
BRD4	YLR038C	0.261701	-0.968339
BRD4	YLR039C	0.437846	-0.367038
BRD4	YLR040C	0.568697	-0.765001
BRD4	YLR041W	1.69099	0.140162
BRD4	YLR042C	1.02164	-0.849214
BRD4	YLR043C	0.48314	-0.957111
BRD4	YLR044C	0.679416	0.360319
BRD4	YLR046C	0.0754907	-0.913479
BRD4	YLR047C	2.31505	0.125044
BRD4	YLR049C	0.0855561	-0.919167
BRD4	YLR050C	3.01963	0.456305
BRD4	YLR053C	0.0654253	-0.780039
BRD4	YLR055C	0.231505	0.0201732
BRD4	YLR057W	0.070458	-0.96366
BRD4	YLR058C	0.518369	-0.575253
BRD4	YLR059C	0.382486	-0.421628
BRD4	YLR063W	0.150981	-0.999865
BRD4	YLR064W	0.508304	-0.606986
BRD4	YLR067C	0.0150981	-0.672819
BRD4	YLR070C	0.528435	-1.22533
BRD4	YLR072W	1.26824	-0.189654
BRD4	YLR073C	1.84701	0.927531
BRD4	YLR077W	2.71766	0.478963
BRD4	YLR080W	0.734776	-0.865712
BRD4	YLR081W	0.608958	-0.835313
BRD4	YLR082C	1.69099	0.178558
BRD4	YLR083C	0.820332	0.0259397
BRD4	YLR084C	0.322094	-0.356471
BRD4	YLR085C	0.120785	-0.631082
BRD4	YLR087C	0.130851	-0.365624
BRD4	YLR089C	0.578762	-0.0937853
BRD4	YLR090W	0.0150981	-0.889966
BRD4	YLR092W	0.0150981	-0.885754
BRD4	YLR093C	0.00503271	-1.23505
BRD4	YLR094C	0.156014	-0.375632
BRD4	YLR095C	0.48314	-1.00644
BRD4	YLR096W	1.20282	-0.0414103
BRD4	YLR097C	1.25315	-0.0470596
BRD4	YLR098C	0.709612	-0.299474
BRD4	YLR099C	0.473075	-0.719937
BRD4	YLR102C	0.100654	-0.918362
BRD4	YLR104W	1.08203	-0.345216
BRD4	YLR107W	1.31857	-0.154878
BRD4	YLR108C	0.578762	-0.828844
BRD4	YLR109W	0.171112	-1.15707
BRD4	YLR110C	0.719678	-0.325269
BRD4	YLR111W	0.397584	-0.176674
BRD4	YLR112W	1.45445	-0.145224
BRD4	YLR113W	0.0905888	-0.901784
BRD4	YLR114C	1.81681	0.406397
BRD4	YLR118C	1.43432	-0.246234
BRD4	YLR119W	5.04781	3.1486
BRD4	YLR121C	1.5853	0.0424266
BRD4	YLR122C	1.29844	-0.755523
BRD4	YLR123C	0.75994	-1.15661
BRD4	YLR124W	0.613991	-0.640005
BRD4	YLR125W	0.226472	-1.05398
BRD4	YLR126C	0.850528	0.0836547
BRD4	YLR128W	1.01158	0.87466
BRD4	YLR130C	0.332159	-0.690126
BRD4	YLR131C	4.45395	0.90506
BRD4	YLR133W	0.276799	-0.669328
BRD4	YLR134W	0.0603926	-0.990636
BRD4	YLR135W	0.558631	-0.562389
BRD4	YLR136C	0.59386	0.109234
BRD4	YLR137W	0.684449	-0.968295
BRD4	YLR138W	0.427781	-0.299089
BRD4	YLR142W	1.62557	0.552546
BRD4	YLR143W	0.251636	-0.0277405
BRD4	YLR144C	0.432813	-0.525262
BRD4	YLR148W	0.135883	1.44822
BRD4	YLR150W	0.603926	0.0829144
BRD4	YLR151C	0.583795	-0.342989
BRD4	YLR152C	0.422748	-0.755247
BRD4	YLR154C	0.669351	0.318089
BRD4	YLR164W	0.35229	-0.893713
BRD4	YLR165C	0.734776	0.0594819
BRD4	YLR168C	0.457977	0.260632
BRD4	YLR169W	0.00503271	-1.31432
BRD4	YLR170C	0.312028	-0.515467
BRD4	YLR171W	0.719678	-0.166871
BRD4	YLR172C	1.19779	1.22523
BRD4	YLR173W	0.719678	-0.0539852
BRD4	YLR174W	0.0956215	-0.965456
BRD4	YLR176C	0.261701	-0.897697
BRD4	YLR177W	0.714645	-0.0813197
BRD4	YLR178C	0.156014	-1.0528
BRD4	YLR179C	0.372421	-0.300987
BRD4	YLR180W	1.68596	0.733295
BRD4	YLR181C	0.447911	-0.27922
BRD4	YLR183C	0.171112	-0.986407
BRD4	YLR187W	0.125818	-0.822012
BRD4	YLR188W	0.679416	-0.469146
BRD4	YLR189C	0.437846	-0.616114
BRD4	YLR191W	0.613991	0.0901566
BRD4	YLR192C	2.80825	0.150561
BRD4	YLR194C	0.508304	-0.245753
BRD4	YLR199C	0.120785	-1.07123
BRD4	YLR201C	0.603926	0.20396
BRD4	YLR202C	0.130851	-0.0923164
BRD4	YLR203C	0.764972	0.690507
BRD4	YLR205C	0.719678	0.85188
BRD4	YLR206W	0.447911	-0.198312
BRD4	YLR207W	0.976346	-0.159518
BRD4	YLR209C	2.04831	0.407837
BRD4	YLR210W	0.845496	-0.524001
BRD4	YLR211C	1.3236	0.68319
BRD4	YLR213C	0.357323	-0.36718
BRD4	YLR214W	0.306995	-0.368447
BRD4	YLR217W	0.00503271	-0.741088
BRD4	YLR218C	0.332159	-0.34962
BRD4	YLR219W	0.64922	-0.035128
BRD4	YLR220W	0.684449	-0.288112
BRD4	YLR224W	4.57474	1.36314
BRD4	YLR225C	0.991444	-0.221727
BRD4	YLR227C	0.221439	-0.500123
BRD4	YLR451W	0.5385	0.210403
BRD4	YML001W	1.54001	0.9383
BRD4	YML002W	1.63563	1.46733
BRD4	YML003W	0.754907	-0.405557
BRD4	YML004C	1.02667	0.220619
BRD4	YML005W	0.931052	1.26436
BRD4	YML006C	1.77151	1.46751
BRD4	YML007W	1.20282	0.272882
BRD4	YML009c	4.95722	1.57255
BRD4	YML011C	2.9542	0.124003
BRD4	YML012W	0.533468	-0.226951
BRD4	YML013W	0.372421	0.35437
BRD4	YML016C	0.181178	-0.5278
BRD4	YML017W	5.07801	1.82506
BRD4	YML018C	0.231505	-0.504338
BRD4	YML019W	1.63563	0.49691
BRD4	YML020W	1.56517	1.03152
BRD4	YML022W	0.231505	-1.82655
BRD4	YML026C	0.00503271	-0.887354
BRD4	YML027W	0.478108	-0.462022
BRD4	YML028W	0.941117	1.15913
BRD4	YML029W	1.8621	0.437061
BRD4	YML030W	0.070458	-0.504717
BRD4	YML031W	3.68898	0.170962
BRD4	YML032C-A	1.61047	1.15876
BRD4	YML033W	0.0301963	-0.994173
BRD4	YML035C-A	0.452944	-0.296315
BRD4	YML036W	5.1535	0.179538
BRD4	YML037C	2.23956	0.871577
BRD4	YML038C	1.25818	-0.530791
BRD4	YML042W	1.75138	0.0990515
BRD4	YML048W	0.18621	-0.700169
BRD4	YML048W-A	0.0855561	-0.843599
BRD4	YML050W	2.20936	0.0536024
BRD4	YML051W	3.35179	1.78595
BRD4	YML052W	1.26321	-0.102766
BRD4	YML053C	0.775038	-0.599374
BRD4	YML054C	0.211374	-1.52196
BRD4	YML055W	0.724711	-0.151019
BRD4	YML056C	1.20785	0.244956
BRD4	YML057W	1.16256	0.0239457
BRD4	YML058C-A	1.00151	0.677923
BRD4	YML058W	0.78007	-0.168525
BRD4	YML059C	2.22949	0.341621
BRD4	YML060W	0.357323	-0.529287
BRD4	YML061C	0.317061	-0.280086
BRD4	YML062C	1.12733	1.16069
BRD4	YML066C	2.33015	-0.0648495
BRD4	YML068W	1.43936	0.0230569
BRD4	YML070W	2.00302	1.10944
BRD4	YML071C	0.75994	-0.487577
BRD4	YML074C	2.78309	0.936351
BRD4	YML076C	0.548566	-0.756051
BRD4	YML078W	3.77957	1.28699
BRD4	YML079W	2.17916	-0.205151
BRD4	YML080W	1.16256	0.752657
BRD4	YML081W	2.11877	0.169688
BRD4	YML082W	2.9693	0.700939
BRD4	YML083C	1.80674	0.675825
BRD4	YML084W	3.33166	1.00718
BRD4	YML087C	2.44087	0.154342
BRD4	YML088W	2.07851	0.429857
BRD4	YML089C	3.32159	1.18111
BRD4	YML090W	0.40765	-0.784618
BRD4	YML095C	1.22798	-0.431529
BRD4	YML096W	2.02315	0.848538
BRD4	YML097C	0.236537	-0.363441
BRD4	YML099C	0.372421	-0.797298
BRD4	YML100W	0.820332	-0.12557
BRD4	YML100W-A	0.880725	-0.273733
BRD4	YML101C	2.81329	0.137903
BRD4	YML102W	0.397584	0.533983
BRD4	YML103C	0.176145	-0.491482
BRD4	YML104C	2.1842	0.00898976
BRD4	YML106W	0.775038	-0.464248
BRD4	YML107C	1.83191	0.0481203
BRD4	YML108W	0.714645	0.0128615
BRD4	YML109W	2.43583	0.282966
BRD4	YML110C	0.543533	-0.549416
BRD4	YML111W	1.54001	-0.394845
BRD4	YML113W	0.70458	-0.323493
BRD4	YML115C	0.231505	-0.358243
BRD4	YML116W	2.05335	-0.105089
BRD4	YML117W	0.120785	-0.277339
BRD4	YML117W-A	1.61047	0.809732
BRD4	YML118W	0.120785	-0.98197
BRD4	YML119W	0.94615	-0.530015
BRD4	YML120C	0.986412	-0.628449
BRD4	YML121W	0.00503271	-0.596139
BRD4	YML122C	1.71112	0.161717
BRD4	YML123C	2.23452	0.321028
BRD4	YML128C	0.347257	-0.507522
BRD4	YML129C	0.437846	-0.56806
BRD4	YML131W	1.67589	0.225093
BRD4	YMR002W	0.749874	0.202318
BRD4	YMR003W	0.770005	0.359146
BRD4	YMR004W	1.077	0.324786
BRD4	YMR006C	2.9995	0.889405
BRD4	YMR007W	2.51132	0.380495
BRD4	YMR008C	1.57021	0.303749
BRD4	YMR009W	1.71616	0.473755
BRD4	YMR010W	1.55008	0.285385
BRD4	YMR011W	0.568697	-0.276312
BRD4	YMR012W	2.88374	0.86327
BRD4	YMR015C	1.72622	0.276792
BRD4	YMR016C	1.31354	0.317546
BRD4	YMR017W	0.915954	-0.402053
BRD4	YMR018W	0.669351	-0.641468
BRD4	YMR019W	2.88374	1.51055
BRD4	YMR020W	1.89733	0.533286
BRD4	YMR022W	3.62859	0.813464
BRD4	YMR023C	0.231505	-0.972884
BRD4	YMR025W	0.70458	0.18529
BRD4	YMR026C	0.0301963	-0.571562
BRD4	YMR027W	1.69099	0.588635
BRD4	YMR029C	0.382486	-0.194052
BRD4	YMR030W	0.11072	-0.547509
BRD4	YMR031C	1.28837	0.593189
BRD4	YMR031W-A	0.00503271	-1.14961
BRD4	YMR034C	2.77806	0.934295
BRD4	YMR035W	0.518369	-0.25826
BRD4	YMR036C	0.764972	0.184723
BRD4	YMR039C	1.75642	1.03612
BRD4	YMR040W	1.62053	0.0360323
BRD4	YMR041C	1.9225	0.395318
BRD4	YMR042W	0.0452944	-1.20638
BRD4	YMR044W	0.145949	-0.332445
BRD4	YMR048W	1.33367	0.433999
BRD4	YMR095C	2.35531	0.737912
BRD4	YMR096W	1.41922	0.232586
BRD4	YMR098C	0.00503271	-0.792225
BRD4	YMR099C	0.0956215	-1.26643
BRD4	YMR100W	0.674383	-0.285915
BRD4	YMR101C	1.22798	0.364996
BRD4	YMR102C	1.45949	-0.0978366
BRD4	YMR103C	0.991444	-0.212841
BRD4	YMR104C	2.64721	0.0743989
BRD4	YMR105C	0.543533	-0.268518
BRD4	YMR106C	1.10216	-0.218679
BRD4	YMR107W	1.90237	2.02603
BRD4	YMR109W	2.10871	0.176819
BRD4	YMR110C	1.47458	-0.011691
BRD4	YMR111C	1.0921	-0.343806
BRD4	YMR114C	0.422748	-1.04965
BRD4	YMR115W	0.135883	-0.804933
BRD4	YMR118C	2.6623	0.190428
BRD4	YMR119W-A	1.45949	-0.254464
BRD4	YMR120C	0.900856	0.16658
BRD4	YMR121C	0.558631	0.096666
BRD4	YMR122C	0.0654253	-1.36457
BRD4	YMR124W	0.367388	-0.634398
BRD4	YMR126C	0.417715	-0.539048
BRD4	YMR127C	0.317061	-0.765726
BRD4	YMR129W	1.3236	-0.167118
BRD4	YMR130W	1.02667	-0.0661089
BRD4	YMR132C	0.699547	-0.360008
BRD4	YMR133W	2.6925	0.606845
BRD4	YMR135C	0.221439	-0.598502
BRD4	YMR139W	0.392552	-0.367337
BRD4	YMR140W	1.65073	-0.687741
BRD4	YMR141C	0.206341	-1.1018
BRD4	YMR144W	1.11223	-0.414477
BRD4	YMR145C	1.99799	-0.464088
BRD4	YMR147W	2.61198	0.134483
BRD4	YMR148W	2.31505	-0.15724
BRD4	YMR151W	0.387519	-0.377427
BRD4	YMR152W	0.161047	-0.958363
BRD4	YMR153C-A	1.91243	-0.481705
BRD4	YMR153W	1.67589	-0.686831
BRD4	YMR154C	1.8621	-1.02565
BRD4	YMR155W	2.12884	-0.234816
BRD4	YMR156C	0.503271	0.0506163
BRD4	YMR157C	2.14394	0.182246
BRD4	YMR158W	0.553598	0.0215018
BRD4	YMR158W-A	0.931052	-0.813158
BRD4	YMR159C	2.20936	0.117396
BRD4	YMR161W	3.35179	-0.0942767
BRD4	YMR162C	1.37896	-0.236438
BRD4	YMR163C	2.03825	0.193572
BRD4	YMR164C	1.82184	0.541875
BRD4	YMR166C	1.91243	0.0490777
BRD4	YMR167W	0.694514	-0.661299
BRD4	YMR169c	1.10216	-0.180408
BRD4	YMR170C	7.56417	1.0817
BRD4	YMR171C	1.6004	-0.100519
BRD4	YMR172C-A	1.52994	0.359018
BRD4	YMR172W	4.49925	0.507157
BRD4	YMR173W-A	0.936085	-0.46398
BRD4	YMR174c	1.34373	0.351666
BRD4	YMR176W	2.59185	-0.10523
BRD4	YMR177W	3.98088	1.38745
BRD4	YMR178W	0.981379	-0.691335
BRD4	YMR180C	3.08505	0.819597
BRD4	YMR181C	2.31505	1.03646
BRD4	YMR182C	2.12884	0.159615
BRD4	YMR183C	1.34877	-0.297542
BRD4	YMR184W	1.37896	-0.0966312
BRD4	YMR186W	0.236537	-0.839652
BRD4	YMR187C	1.82184	-0.180884
BRD4	YMR189W	1.42426	-0.278569
BRD4	YMR191W	2.45093	1.43632
BRD4	YMR192W	2.74786	0.965499
BRD4	YMR195W	2.9693	1.16546
BRD4	YMR196W	0.976346	-0.53005
BRD4	YMR199W	0.75994	-0.334
BRD4	YMR201C	0.528435	-0.494695
BRD4	YMR204C	1.40413	-0.0746203
BRD4	YMR206W	0.89079	-0.680886
BRD4	YMR207C	0.478108	0.0564632
BRD4	YMR209C	2.04328	0.919261
BRD4	YMR210W	4.13186	0.885722
BRD4	YMR214W	0.553598	0.569063
BRD4	YMR215W	0.679416	-0.344595
BRD4	YMR216C	1.38903	0.787249
BRD4	YMR219W	0.0402617	-0.386028
BRD4	YMR221C	1.02667	-0.49513
BRD4	YMR222C	1.66583	0.0888594
BRD4	YMR223W	2.90891	1.61232
BRD4	YMR225C	1.39909	-0.208172
BRD4	YMR226C	0.266734	-0.612527
BRD4	YMR230W	0.246603	-0.0960229
BRD4	YMR232W	1.46452	-0.590369
BRD4	YMR233W	1.76648	-0.0225286
BRD4	YMR234W	1.49975	0.0146209
BRD4	YMR237W	0.317061	-0.405345
BRD4	YMR238W	0.790136	-0.708425
BRD4	YMR241W	2.82335	1.85894
BRD4	YMR242C	0.0452944	-0.46014
BRD4	YMR244C-A	0.276799	-0.62141
BRD4	YMR244W	0.598893	-0.200214
BRD4	YMR245W	1.16256	0.837376
BRD4	YMR246W	1.12733	-0.338504
BRD4	YMR247C	2.03322	0.762767
BRD4	YMR251W	1.02164	-0.367521
BRD4	YMR251W-A	1.51988	0.955562
BRD4	YMR252C	3.35682	2.04529
BRD4	YMR253C	1.44942	0.183165
BRD4	YMR254C	2.18923	0.669859
BRD4	YMR255W	3.67388	2.04968
BRD4	YMR258C	0.603926	-0.399342
BRD4	YMR259C	2.95924	0.139086
BRD4	YMR261C	0.0452944	-0.69489
BRD4	YMR262W	2.89884	0.903587
BRD4	YMR264W	2.43583	0.872243
BRD4	YMR265C	2.75289	-0.0230856
BRD4	YMR271C	1.73125	-0.753804
BRD4	YMR273C	1.22295	-0.264547
BRD4	YMR274C	3.44741	0.914354
BRD4	YMR275C	0.714645	0.0794566
BRD4	YMR276W	4.02114	1.19211
BRD4	YMR278W	2.86865	0.206679
BRD4	YMR279C	1.55008	-0.327409
BRD4	YMR280C	2.84852	0.916576
BRD4	YMR283C	1.31857	-0.640839
BRD4	YMR284W	0.669351	-0.966021
BRD4	YMR285C	3.09009	0.762225
BRD4	YMR287C	0.00503271	-0.590008
BRD4	YMR289W	1.99799	1.58969
BRD4	YMR291W	1.57021	0.550213
BRD4	YMR292W	2.58681	-0.129499
BRD4	YMR294W	0.0956215	-0.729148
BRD4	YMR294W-A	1.59537	0.494883
BRD4	YMR295C	0.0754907	-0.599958
BRD4	YMR299C	0.926019	0.188456
BRD4	YMR302C	1.88727	0.776984
BRD4	YMR303C	0.518369	-0.540452
BRD4	YMR304C-A	1.92753	-0.274365
BRD4	YMR304W	0.0956215	-0.768859
BRD4	YMR305C	1.47458	0.291886
BRD4	YMR306C-A	1.89733	0.447409
BRD4	YMR306W	2.53649	-0.0456972
BRD4	YMR307W	0.276799	-0.324602
BRD4	YMR310C	0.0553598	-0.743655
BRD4	YMR311C	2.34524	0.0975762
BRD4	YMR313C	0.785103	-0.641099
BRD4	YMR315W	1.65073	-0.40247
BRD4	YMR316C-A	0.795169	-0.20122
BRD4	YMR316C-B	0.312028	-1.05776
BRD4	YMR316W	1.20282	-0.378254
BRD4	YMR317W	2.4459	-0.0239788
BRD4	YMR318C	1.28837	-0.994708
BRD4	YMR319C	0.865627	-0.825306
BRD4	YMR320W	2.1842	-0.522003
BRD4	YNL051W	0.437846	-0.529726
BRD4	YNL052W	1.47962	-0.311175
BRD4	YNL054W	1.42426	1.46133
BRD4	YNL056W	8.62607	0.498339
BRD4	YNL057W	3.26623	1.08334
BRD4	YNL063W	4.54957	0.254878
BRD4	YNL065W	4.0312	0.990246
BRD4	YNL066W	3.69904	0.389829
BRD4	YNL067W	0.196276	-0.517836
BRD4	YNL068C	0.89079	-0.446827
BRD4	YNL070W	1.01158	0.879365
BRD4	YNL071W	0.432813	-0.414251
BRD4	YNL072W	0.5385	-1.37294
BRD4	YNL074C	2.78309	-0.232165
BRD4	YNL076W	2.04831	-0.0146229
BRD4	YNL077W	1.05687	1.04515
BRD4	YNL078W	2.54152	-0.316559
BRD4	YNL079C	0.140916	-0.529547
BRD4	YNL082W	1.08707	-0.652487
BRD4	YNL083W	1.10216	-0.226887
BRD4	YNL085W	1.384	-0.719702
BRD4	YNL087W	4.28284	0.498443
BRD4	YNL090W	2.32008	1.21236
BRD4	YNL091W	0.176145	-0.917169
BRD4	YNL092W	1.85707	-0.749858
BRD4	YNL093W	0.261701	-1.22343
BRD4	YNL094W	1.16759	-0.622135
BRD4	YNL095C	2.48616	0.226225
BRD4	YNL097C	0.457977	0.0827973
BRD4	YNL098C	0.926019	0.115071
BRD4	YNL099C	6.7237	1.14381
BRD4	YNL100W	2.27982	0.380361
BRD4	YNL101W	2.68244	0.773132
BRD4	YNL104C	1.99295	0.0410485
BRD4	YNL105W	1.55511	-0.448764
BRD4	YNL106C	1.19779	-0.262585
BRD4	YNL107W	0.105687	-0.650246
BRD4	YNL108C	0.613991	-0.864599
BRD4	YNL115C	2.29492	1.46249
BRD4	YNL116W	1.42929	0.198273
BRD4	YNL117W	0.221439	2.4458
BRD4	YNL119W	0.24157	0.198788
BRD4	YNL120C	0.18621	-0.159864
BRD4	YNL121C	0.100654	-0.562214
BRD4	YNL122C	0.75994	-0.97904
BRD4	YNL123W	0.78007	-0.614712
BRD4	YNL125C	2.45093	0.273528
BRD4	YNL127W	0.981379	-0.151224
BRD4	YNL128W	1.30851	-0.30491
BRD4	YNL129W	2.58681	-0.112543
BRD4	YNL130C	1.58027	-0.144457
BRD4	YNL134C	2.41067	0.608333
BRD4	YNL136W	0.78007	0.398722
BRD4	YNL140C	0.387519	-0.373102
BRD4	YNL141W	1.52491	-0.506442
BRD4	YNL142W	0.387519	-0.212558
BRD4	YNL143C	2.6623	0.011085
BRD4	YNL144C	2.39557	0.728591
BRD4	YNL145W	2.1238	-0.72389
BRD4	YNL146W	2.36034	-0.0745561
BRD4	YNL154C	0.744841	0.0231228
BRD4	YNL155W	0.900856	0.748194
BRD4	YNL159C	2.4006	1.30324
BRD4	YNL160W	0.624056	0.220152
BRD4	YNL168C	0.402617	-0.789065
BRD4	YNL170W	0.291897	-0.25848
BRD4	YNL173C	1.49975	1.09163
BRD4	YNL175C	0.301963	-0.177034
BRD4	YNL176C	0.342224	-0.368615
BRD4	YNL179C	0.332159	-0.444658
BRD4	YNL183C	3.69401	1.16804
BRD4	YNL189W	0.00503271	-0.506436
BRD4	YNL190W	0.800201	-0.500606
BRD4	YNL191W	1.05687	0.484985
BRD4	YNL193W	0.941117	-0.0828305
BRD4	YNL194C	0.910921	-0.549806
BRD4	YNL195C	0.820332	-0.885367
BRD4	YNL196C	0.568697	0.609745
BRD4	YNL197C	0.251636	0.371431
BRD4	YNL198C	0.513337	-0.747163
BRD4	YNL200C	1.01661	-0.682287
BRD4	YNL201C	1.15249	0.439537
BRD4	YNL202W	2.89381	1.4979
BRD4	YNL204C	1.47962	1.91061
BRD4	YNL205C	0.588827	0.419079
BRD4	YNL206C	0.342224	-0.0448561
BRD4	YNL211C	0.377453	0.144109
BRD4	YNL212W	0.820332	0.410981
BRD4	YNL214W	2.1993	0.565363
BRD4	YNL215W	0.11072	-0.56166
BRD4	YNL217W	0.533468	-0.832804
BRD4	YNL219C	0.931052	0.0753871
BRD4	YNL224C	0.875692	0.897213
BRD4	YNL230C	0.634122	0.291781
BRD4	YNL231C	0.256668	-0.809343
BRD4	YNL233W	0.669351	-0.185498
BRD4	YNL235C	0.508304	-0.235135
BRD4	YNL239W	2.20936	1.97589
BRD4	YNL242W	0.246603	-0.836164
BRD4	YNL249C	1.43936	-0.133762
BRD4	YNL252C	0.29693	-0.743767
BRD4	YNL253W	0.825365	-0.37436
BRD4	YNL254C	1.05687	-0.135848
BRD4	YNL255C	2.73276	0.472945
BRD4	YNL257C	2.46603	-0.595837
BRD4	YNL259C	0.513337	-0.618229
BRD4	YNL264C	1.00151	0.560049
BRD4	YNL265C	0.578762	-0.256031
BRD4	YNL266W	1.60544	0.0887174
BRD4	YNL269W	1.8923	0.517778
BRD4	YNL270C	0.64922	-0.5286
BRD4	YNL273W	0.0201309	-0.937208
BRD4	YNL274C	8.62607	1.5518
BRD4	YNL275W	1.75138	0.164206
BRD4	YNL278W	0.0603926	-1.00958
BRD4	YNL279W	4.69552	0.58507
BRD4	YNL281W	1.09713	0.106013
BRD4	YNL283C	1.69602	2.19362
BRD4	YNL285W	0.201309	-0.896562
BRD4	YNL286W	0.367388	-0.320342
BRD4	YNL288W	1.18772	-0.448618
BRD4	YNL289W	0.619024	-0.628448
BRD4	YNL291C	0.457977	-0.59126
BRD4	YNL292W	0.674383	-0.307027
BRD4	YNL293W	0.749874	-0.278929
BRD4	YNL294C	0.805234	-1.46761
BRD4	YNL295W	0.795169	-1.15315
BRD4	YNL299W	0.327126	0.223086
BRD4	YNL300W	0.795169	-0.393257
BRD4	YNL301C	1.91243	0.319698
BRD4	YNL303W	0.89079	-0.349478
BRD4	YNL304W	1.30851	-0.67164
BRD4	YNL305C	2.49623	0.723081
BRD4	YNL311C	2.45596	0.114951
BRD4	YNL314W	1.77151	1.09678
BRD4	YNL316C	1.81681	0.0292325
BRD4	YNL318C	0.729743	-0.71604
BRD4	YNL319W	1.05184	-0.205346
BRD4	YNL321W	0.971314	-1.23007
BRD4	YNL322C	1.28837	0.118617
BRD4	YNL323W	0.276799	-0.0775866
BRD4	YNL324W	0.176145	-0.587343
BRD4	YNL325C	0.936085	0.868536
BRD4	YNL326C	1.59537	-0.123828
BRD4	YNL327W	1.66583	-0.173695
BRD4	YNL329C	0.83543	-0.65817
BRD4	YNL332W	1.24811	-0.063815
BRD4	YNL333W	0.161047	-1.6224
BRD4	YNL334C	0.301963	-0.519736
BRD4	YNL335W	1.50478	-0.168811
BRD4	YNL336W	2.88374	-0.132593
BRD4	YNL338W	0.613991	-0.441333
BRD4	YNL339C	1.70106	-0.345158
BRD4	YOL002C	0.573729	-0.0565389
BRD4	YOL003C	0.196276	-0.842516
BRD4	YOL006C	0.171112	-0.36207
BRD4	YOL007C	0.437846	0.223614
BRD4	YOL008W	0.191243	-0.322119
BRD4	YOL011W	0.951183	0.307466
BRD4	YOL012C	0.135883	0.641473
BRD4	YOL013C	1.78158	0.137621
[truncated: 487 more rows]

## Sheet: BRSK2
Table S2. Barcode counts of yeast deletion strains obtained from high-throughput sequencing.
Query (Kinase)	Subject (yeast gene deletion)	Normalized barcode counts	Z-score
BRSK2	YAL001C	0.0329223	-0.704867
BRSK2	YAL002W	0.472884	-0.284102
BRSK2	YAL004W	1.33784	0.636185
BRSK2	YAL005C	1.86161	-0.099786
BRSK2	YAL007C	1.20915	0.858103
BRSK2	YAL008W	0.595594	0.254667
BRSK2	YAL009W	0.0179576	-0.556197
BRSK2	YAL011W	0.17359	-0.494094
BRSK2	YAL012W	3.25033	0.0568881
BRSK2	YAL014C	1.21214	0.494781
BRSK2	YAL015C	1.31989	-0.143007
BRSK2	YAL017W	0.763199	-0.0792668
BRSK2	YAL018C	0.948761	0.118289
BRSK2	YAL019W	0.556686	-0.249124
BRSK2	YAL020C	0.0239435	-0.680029
BRSK2	YAL021C	0.0538729	-0.698224
BRSK2	YAL022C	0.766192	-0.331549
BRSK2	YAL023C	0.00299294	-1.44592
BRSK2	YAL026C	0.00598587	-0.70148
BRSK2	YAL027W	0.849994	0.0265502
BRSK2	YAL028W	1.3977	-0.0438156
BRSK2	YAL029C	0.329223	-0.715251
BRSK2	YAL030W	1.34682	0.351914
BRSK2	YAL031C	0.10176	-1.09023
BRSK2	YAL034C	0.870945	-0.0248808
BRSK2	YAL036C	1.272	0.128252
BRSK2	YAL037W	1.33186	0.862592
BRSK2	YAL039C	0.314258	-0.710594
BRSK2	YAL040C	0.0359152	-0.807431
BRSK2	YAL042W	0.68239	-0.159267
BRSK2	YAL043C-	0.170597	-0.650682
BRSK2	YAL044C	0.0688375	-0.707434
BRSK2	YAL045C	0.891895	0.335334
BRSK2	YAL046C	0.359152	-0.25983
BRSK2	YAL048C	0.281336	-0.38848
BRSK2	YAL049C	0.27535	-0.412512
BRSK2	YAL051W	0.870945	-0.081693
BRSK2	YAL053W	1.59524	0.342122
BRSK2	YAL054C	0.68239	-0.154977
BRSK2	YAL055W	0.849994	-0.266431
BRSK2	YAL056W	0.233449	-0.700829
BRSK2	YAL058W	0.460912	-0.260866
BRSK2	YAL059W	0.308272	0.0291206
BRSK2	YAL060W	0.882916	-0.291961
BRSK2	YAL061W	2.34946	1.17962
BRSK2	YAL062W	1.75386	0.20294
BRSK2	YAL065C	0.787142	-0.185436
BRSK2	YAL066W	0.820065	0.415368
BRSK2	YAL067C	0.649467	-0.532654
BRSK2	YAL068C	1.24207	-0.777028
BRSK2	YAR003W	0.131689	-0.400658
BRSK2	YAR007C	0.448941	0.707107
BRSK2	YAR014C	0.272357	-0.142879
BRSK2	YAR018C	0.00598587	-0.415299
BRSK2	YAR020C	1.12235	0.242748
BRSK2	YAR023C	0.463905	-0.175481
BRSK2	YAR027W	1.05351	0.964267
BRSK2	YAR028W	1.62516	0.159484
BRSK2	YAR029W	1.23608	-0.0249353
BRSK2	YAR030C	0.847001	0.0168033
BRSK2	YAR031W	1.62217	0.0277469
BRSK2	YAR035W	0.661439	-0.251084
BRSK2	YAR037W	1.71795	1.11063
BRSK2	YAR040C	0.936789	0.140991
BRSK2	YAR042W	0.894888	-0.22797
BRSK2	YAR043C	0.194541	-0.79056
BRSK2	YAR044W	0.236442	-0.547374
BRSK2	YAR047C	0.673411	-0.582993
BRSK2	YBL001C	0.299294	-0.0945746
BRSK2	YBL002W	0.451933	0.0559688
BRSK2	YBL003C	0.628517	0.145191
BRSK2	YBL005W	0.90686	-0.214304
BRSK2	YBL008W	0.0628517	-0.642434
BRSK2	YBL009W	0.706333	0.151703
BRSK2	YBL010C	0.49982	-0.373964
BRSK2	YBL011W	0.796121	-0.354302
BRSK2	YBL012C	0.811086	-0.163229
BRSK2	YBL013W	0.646474	-0.229735
BRSK2	YBL015W	0.85598	-0.338639
BRSK2	YBL017C	0.835029	2.18006
BRSK2	YBL019W	0.981683	0.482368
BRSK2	YBL022C	0.0149647	-0.802265
BRSK2	YBL024W	0.0389082	-0.675704
BRSK2	YBL027W	0.188555	0.340657
BRSK2	YBL028C	0.383096	-0.0719589
BRSK2	YBL029W	0.445948	0.75223
BRSK2	YBL031W	0.0359152	-0.616178
BRSK2	YBL032W	0.248414	0.371325
BRSK2	YBL036C	0.748234	-0.107674
BRSK2	YBL037W	0.233449	-0.740763
BRSK2	YBL038W	0.490842	-0.0126195
BRSK2	YBL042C	0.0658446	-0.91039
BRSK2	YBL043W	0.32623	-0.234856
BRSK2	YBL044W	0.146654	-0.527049
BRSK2	YBL045C	1.26601	0.244468
BRSK2	YBL046W	0.182569	-0.170143
BRSK2	YBL048W	0.371124	-0.318237
BRSK2	YBL049W	0.70334	-0.469516
BRSK2	YBL051C	0.436969	0.154358
BRSK2	YBL052C	0.407039	-0.00170324
BRSK2	YBL053W	1.42464	0.108008
BRSK2	YBL054W	0.380103	0.133029
BRSK2	YBL055C	1.57428	1.91611
BRSK2	YBL056W	1.17622	0.997099
BRSK2	YBL057C	0.95774	0.239136
BRSK2	YBL059W	1.52041	-0.0411298
BRSK2	YBL060W	0.547707	-0.0693178
BRSK2	YBL061C	1.0595	0.0492571
BRSK2	YBL062W	0.538729	-0.38253
BRSK2	YBL063W	0.736262	-0.491227
BRSK2	YBL064C	1.39172	0.377776
BRSK2	YBL065W	0.344188	1.22176
BRSK2	YBL066C	1.77481	0.315911
BRSK2	YBL067C	0.445948	-0.837017
BRSK2	YBL068W	0.847001	-0.546091
BRSK2	YBL069W	1.53238	0.156592
BRSK2	YBL070C	1.12834	-0.307347
BRSK2	YBL071C	0.0448941	-0.74799
BRSK2	YBL072C	0.215491	-0.339764
BRSK2	YBL075C	1.70897	0.658109
BRSK2	YBL078C	2.33748	0.822721
BRSK2	YBL079W	0.00598587	-1.15388
BRSK2	YBL080C	0.945768	0.256047
BRSK2	YBL081W	0.951754	0.304495
BRSK2	YBL082C	0.356159	-0.347192
BRSK2	YBL083C	0.0179576	-0.776857
BRSK2	YBL085W	1.68802	0.841669
BRSK2	YBL086C	1.16725	-0.144355
BRSK2	YBL087C	0.092781	-0.297501
BRSK2	YBL088C	0.356159	-0.553773
BRSK2	YBL089W	0.523764	-0.446246
BRSK2	YBL090W	0.188555	-0.447587
BRSK2	YBL091C	0.847001	-0.21667
BRSK2	YBL094C	0.685382	-0.0351282
BRSK2	YBL095W	3.25931	0.795118
BRSK2	YBL096C	1.09841	-0.387397
BRSK2	YBL098W	1.88555	0.353453
BRSK2	YBL099W	0.0718305	-0.974727
BRSK2	YBL100C	0.0808093	-0.600162
BRSK2	YBL101C	12.5045	0.0442693
BRSK2	YBL102W	1.64013	-0.0409785
BRSK2	YBL104C	0.739255	-0.199635
BRSK2	YBL106C	0.410032	-0.238296
BRSK2	YBL107C	1.34383	-0.522737
BRSK2	YBR001C	1.47252	-0.603674
BRSK2	YBR005W	1.2301	0.0580604
BRSK2	YBR006W	0.583623	0.171877
BRSK2	YBR007C	0.999641	-0.845558
BRSK2	YBR008C	2.00527	0.743194
BRSK2	YBR009C	0.10176	-0.672086
BRSK2	YBR010W	1.13732	0.29752
BRSK2	YBR012C	1.72992	-0.0133056
BRSK2	YBR013C	1.26601	-0.172755
BRSK2	YBR014C	1.28696	0.00445503
BRSK2	YBR015C	0.218484	-0.472668
BRSK2	YBR016W	0.826051	-0.906739
BRSK2	YBR018C	1.4396	-0.450629
BRSK2	YBR019C	0.709326	0.701354
BRSK2	YBR020W	0.709326	-0.772625
BRSK2	YBR022W	0.960733	-0.582232
BRSK2	YBR023C	0.909853	0.873298
BRSK2	YBR024W	1.40967	0.47144
BRSK2	YBR025C	0.49982	0.166865
BRSK2	YBR027C	0.248414	-0.688385
BRSK2	YBR028C	0.730277	-0.0734365
BRSK2	YBR030W	0.667425	0.275663
BRSK2	YBR031W	0.0239435	-0.827411
BRSK2	YBR032W	0.371124	-0.4489
BRSK2	YBR033W	1.2301	0.134649
BRSK2	YBR034C	3.03783	1.12153
BRSK2	YBR037C	0.359152	-0.497024
BRSK2	YBR040W	1.08045	0.50214
BRSK2	YBR041W	0.362145	-0.0898132
BRSK2	YBR042C	0.487849	-0.37476
BRSK2	YBR043C	1.89453	0.0739151
BRSK2	YBR044C	0.413025	0.916262
BRSK2	YBR045C	1.67006	-0.21707
BRSK2	YBR046C	1.2301	-0.889433
BRSK2	YBR047W	2.3285	0.934459
BRSK2	YBR048W	0.0419011	-0.307395
BRSK2	YBR050C	2.95104	-0.618535
BRSK2	YBR051W	1.39471	-0.606534
BRSK2	YBR052C	1.16126	-0.654539
BRSK2	YBR053C	0.811086	-0.719469
BRSK2	YBR054W	1.26302	0.0955108
BRSK2	YBR056W	1.9933	1.56334
BRSK2	YBR057C	1.31989	-0.0603627
BRSK2	YBR058C	0.897881	-0.554533
BRSK2	YBR059C	2.4153	-0.082768
BRSK2	YBR062C	1.34383	0.158827
BRSK2	YBR063C	2.02023	0.752916
BRSK2	YBR064W	2.02323	-0.277596
BRSK2	YBR065C	1.67006	0.0946986
BRSK2	YBR066C	2.33449	0.484948
BRSK2	YBR067C	1.03256	-0.112567
BRSK2	YBR068C	2.17586	0.704793
BRSK2	YBR069C	1.08045	0.399977
BRSK2	YBR071W	0.888902	-0.775398
BRSK2	YBR072W	1.96337	0.336151
BRSK2	YBR073W	0.448941	-0.576651
BRSK2	YBR074W	1.83467	-0.497511
BRSK2	YBR075W	1.50545	0.330074
BRSK2	YBR076W	0.047887	0.718229
BRSK2	YBR077C	0.2544	-0.596078
BRSK2	YBR083W	0.823058	-0.367095
BRSK2	YBR084C-A	0.00299294	-0.761361
BRSK2	YBR084W	0.511792	-0.944165
BRSK2	YBR086C	0.457919	-0.707107
BRSK2	YBR087W	0.0419011	-0.49061
BRSK2	YBR090C-A	0.589609	-0.41444
BRSK2	YBR092C	0.676404	-0.530703
BRSK2	YBR093C	1.28397	0.333701
BRSK2	YBR094W	0.649467	0.0457926
BRSK2	YBR098W	0.257393	-0.274553
BRSK2	YBR099C	0.0329223	-0.897088
BRSK2	YBR100W	1.28397	1.44668
BRSK2	YBR101C	0.769185	-0.0120307
BRSK2	YBR103W	0.0718305	-0.642021
BRSK2	YBR104W	0.823058	-0.345356
BRSK2	YBR105C	0.547707	-0.653069
BRSK2	YBR107C	0.161619	-0.695017
BRSK2	YBR113W	0.410032	0.895742
BRSK2	YBR114W	0.757213	2.66731
BRSK2	YBR116C	0.63151	0.0598051
BRSK2	YBR119W	0.0179576	-1.13341
BRSK2	YBR120C	1.12235	-0.338692
BRSK2	YBR128C	0.568658	-0.678401
BRSK2	YBR129C	0.915839	0.473358
BRSK2	YBR130C	0.835029	-0.00509038
BRSK2	YBR131W	0.517778	0.26259
BRSK2	YBR134W	0.10176	-0.940177
BRSK2	YBR137W	0.87693	-0.451868
BRSK2	YBR138C	0.727284	-0.407121
BRSK2	YBR139W	1.38274	-0.0806389
BRSK2	YBR141C	0.939782	-0.395068
BRSK2	YBR144C	0.658446	-0.0748242
BRSK2	YBR145W	1.39471	0.488023
BRSK2	YBR146W	0.00897881	-0.482557
BRSK2	YBR147W	1.31989	-0.585678
BRSK2	YBR148W	1.10439	-0.725635
BRSK2	YBR150C	0.206513	-0.858147
BRSK2	YBR151W	1.41566	0.98356
BRSK2	YBR157C	0.445948	-0.653688
BRSK2	YBR158W	0.17359	-0.653537
BRSK2	YBR159W	0.185562	-0.0361157
BRSK2	YBR161W	1.1882	0.589374
BRSK2	YBR162W-A	1.02658	0.161958
BRSK2	YBR163W	0.0239435	-0.466119
BRSK2	YBR164C	1.12235	0.541666
BRSK2	YBR169C	1.45157	-0.223312
BRSK2	YBR170C	0.197534	-0.935886
BRSK2	YBR172C	1.45756	0.344304
BRSK2	YBR174C	0.0748234	-0.692741
BRSK2	YBR175W	0.00897881	-0.994085
BRSK2	YBR176W	0.751227	-0.0513875
BRSK2	YBR177C	0.49982	-0.455163
BRSK2	YBR178W	0.422004	-0.573927
BRSK2	YBR179C	0.092781	-0.845756
BRSK2	YBR180W	0.233449	-0.598048
BRSK2	YBR182C	0.356159	-0.321173
BRSK2	YBR183W	1.32587	0.16372
BRSK2	YBR184W	0.511792	-0.455911
BRSK2	YBR185C	1.42464	-0.291505
BRSK2	YBR186W	0.790135	-0.0317935
BRSK2	YBR187W	0.0299294	-0.541007
BRSK2	YBR188C	0.436969	-0.215969
BRSK2	YBR195C	0.104753	-0.339289
BRSK2	YBR197C	0.493835	-0.424696
BRSK2	YBR199W	1.17323	0.157743
BRSK2	YBR203W	1.62516	0.705677
BRSK2	YBR204C	2.44822	0.866939
BRSK2	YBR205W	2.56794	0.662624
BRSK2	YBR206W	2.48414	0.639337
BRSK2	YBR207W	1.87059	0.786712
BRSK2	YBR208C	0.715312	-0.348846
BRSK2	YBR210W	1.55034	3.00039
BRSK2	YBR212W	0.673411	-0.43682
BRSK2	YBR213W	0.0269364	-0.358855
BRSK2	YBR214W	0.221477	-0.867166
BRSK2	YBR215W	0.128696	-0.621007
BRSK2	YBR216C	1.81073	0.392299
BRSK2	YBR217W	1.16425	-0.123123
BRSK2	YBR218C	2.2028	0.64382
BRSK2	YBR219C	1.07147	0.0350869
BRSK2	YBR220C	1.08644	-0.723591
BRSK2	YBR221C	0.640488	1.05818
BRSK2	YBR222C	0.60158	-0.603763
BRSK2	YBR223C	0.981683	0.381344
BRSK2	YBR224W	1.51742	0.326627
BRSK2	YBR225W	1.10439	0.238417
BRSK2	YBR226C	2.0352	0.124114
BRSK2	YBR227C	1.39172	-0.273548
BRSK2	YBR228W	2.71459	0.932848
BRSK2	YBR229C	2.77146	0.400465
BRSK2	YBR230C	2.96301	0.108481
BRSK2	YBR231C	0.293308	-0.57132
BRSK2	YBR232C	1.24506	-0.529257
BRSK2	YBR233W	0.867952	-0.0739203
BRSK2	YBR235W	0.700347	-0.211272
BRSK2	YBR238C	0.861966	-0.29484
BRSK2	YBR239C	0.841015	-0.781532
BRSK2	YBR240C	3.67533	2.07316
BRSK2	YBR241C	2.02323	0.166643
BRSK2	YBR242W	1.39471	0.104882
BRSK2	YBR244W	5.96492	0.236952
BRSK2	YBR245C	1.89752	0.416648
BRSK2	YBR246W	1.13432	-0.0671343
BRSK2	YBR248C	1.38274	-0.0111672
BRSK2	YBR249C	0.685382	-0.0667929
BRSK2	YBR250W	2.07111	0.158863
BRSK2	YBR251W	0.999641	0.604703
BRSK2	YBR255W	0.68239	-0.497273
BRSK2	YBR258C	1.17323	-0.117213
BRSK2	YBR259W	2.23572	0.187721
BRSK2	YBR260C	1.31091	-0.107172
BRSK2	YBR261C	1.46355	0.067641
BRSK2	YBR262C	1.92446	0.11629
BRSK2	YBR263W	1.36179	-0.299887
BRSK2	YBR264C	0.607566	-0.765382
BRSK2	YCL001W	0.658446	0.147966
BRSK2	YCL005W	0.0987669	-0.711275
BRSK2	YCL006C	3.0528	-0.385873
BRSK2	YCL008C	0.924817	0.299627
BRSK2	YCL009C	0.371124	-0.307789
BRSK2	YCL010C	0.149647	-0.392117
BRSK2	YCL011C	0.808093	0.330753
BRSK2	YCL012W	0.948761	-0.459382
BRSK2	YCL013W	1.39471	0.779809
BRSK2	YCL014W	1.14031	1.1874
BRSK2	YCL022C	1.3558	-0.12496
BRSK2	YCL023C	4.84257	-0.161587
BRSK2	YCL024W	0.852987	0.828927
BRSK2	YCL025C	0.104753	0.191011
BRSK2	YCL026C	0.49982	-0.377985
BRSK2	YCL027W	0.676404	0.0307988
BRSK2	YCL028W	0.374117	-0.237134
BRSK2	YCL030C	0.0718305	-0.218189
BRSK2	YCL033C	0.134682	-0.682728
BRSK2	YCL035C	0.481863	-0.0489518
BRSK2	YCL036W	0.416018	0.135139
BRSK2	YCL037C	0.0389082	-0.819961
BRSK2	YCL038C	1.97235	-0.246276
BRSK2	YCL039W	0.897881	0.372538
BRSK2	YCL042W	0.095774	1.3796
BRSK2	YCL044C	0.353167	-0.41692
BRSK2	YCL045C	0.942775	0.15819
BRSK2	YCL046W	1.00862	1.31538
BRSK2	YCL047C	0.251407	-0.483976
BRSK2	YCL048W	0.781156	0.575765
BRSK2	YCL049C	1.40369	0.0440135
BRSK2	YCL050C	0.320244	-0.446478
BRSK2	YCL051W	0.42799	-0.365672
BRSK2	YCL055W	0.0688375	-0.370925
BRSK2	YCL056C	0.42799	-0.411498
BRSK2	YCL057W	0.242428	-0.706588
BRSK2	YCL058C	0.0299294	-0.707107
BRSK2	YCL061C	0.185562	-0.223389
BRSK2	YCL062W	0.610559	-0.373895
BRSK2	YCL063W	0.107746	0.0245971
BRSK2	YCL064C	1.00862	0.800855
BRSK2	YCL069W	1.19119	0.403446
BRSK2	YCL073C	1.19418	-0.39753
BRSK2	YCL074W	3.91177	1.29715
BRSK2	YCL075W	5.06106	0.0314356
BRSK2	YCL076W	5.26458	1.52131
BRSK2	YCR001W	0.311265	-0.129357
BRSK2	YCR004C	0.47887	-0.0587849
BRSK2	YCR005C	0.541722	-0.487789
BRSK2	YCR006C	0.646474	0.375383
BRSK2	YCR007C	0.0748234	-0.825266
BRSK2	YCR008W	0.212499	-0.730641
BRSK2	YCR010C	0.311265	-0.919789
BRSK2	YCR011C	0.242428	-0.894914
BRSK2	YCR014C	0.0119717	-0.415245
BRSK2	YCR015C	1.21214	0.180006
BRSK2	YCR016W	0.511792	-0.0194698
BRSK2	YCR017C	0.278343	-0.283592
BRSK2	YCR018C	2.48414	0.378809
BRSK2	YCR019W	1.32288	-0.0725783
BRSK2	YCR020C	0.167604	-0.568721
BRSK2	YCR020C-A	0.353167	0.174675
BRSK2	YCR021C	1.35879	0.0699231
BRSK2	YCR022C	0.852987	0.474641
BRSK2	YCR023C	0.960733	0.246044
BRSK2	YDL001W	0.185562	-0.212254
BRSK2	YDL006W	0.266371	0.044871
BRSK2	YDL009C	0.284329	-0.873022
BRSK2	YDL010W	0.356159	-0.0240715
BRSK2	YDL011C	0.365138	-0.431531
BRSK2	YDL012C	0.634503	-0.489235
BRSK2	YDL013W	0.00299294	-0.707107
BRSK2	YDL018C	0.245421	-0.859235
BRSK2	YDL019C	0.58063	0.121421
BRSK2	YDL020C	0.448941	0.878133
BRSK2	YDL021W	0.565665	0.105509
BRSK2	YDL022W	0.284329	-0.562935
BRSK2	YDL023C	0.314258	-0.395585
BRSK2	YDL024C	0.835029	-0.0153063
BRSK2	YDL025C	0.457919	0.608048
BRSK2	YDL026W	0.879923	0.120784
BRSK2	YDL027C	0.284329	-0.504389
BRSK2	YDL032W	0.221477	0.81469
BRSK2	YDL033C	0.0598587	-0.505649
BRSK2	YDL034W	0.775171	-0.418669
BRSK2	YDL035C	0.451933	-0.416325
BRSK2	YDL036C	1.16425	0.0274185
BRSK2	YDL037C	0.125703	-0.559561
BRSK2	YDL038C	0.395068	-0.406688
BRSK2	YDL039C	0.583623	-0.946734
BRSK2	YDL041W	0.12271	-0.272093
BRSK2	YDL044C	0.179576	0.801703
BRSK2	YDL046W	0.047887	-0.800601
BRSK2	YDL048C	0.0179576	-1.0251
BRSK2	YDL049C	0.317251	-0.711523
BRSK2	YDL050C	0.092781	-0.420926
BRSK2	YDL051W	0.161619	-1.13995
BRSK2	YDL052C	1.12834	0.425669
BRSK2	YDL053C	0.532743	-0.32521
BRSK2	YDL054C	0.448941	0.988693
BRSK2	YDL056W	0.0149647	-0.675635
BRSK2	YDL059C	0.134682	0.105287
BRSK2	YDL061C	0.20352	-0.0632274
BRSK2	YDL062W	0.0359152	-0.618482
BRSK2	YDL063C	0.170597	-0.122829
BRSK2	YDL065C	0.179576	-0.534242
BRSK2	YDL066W	0.00299294	-0.73943
BRSK2	YDL067C	0.335209	-0.30505
BRSK2	YDL068W	0.0688375	-0.642439
BRSK2	YDL069C	0.197534	-0.79349
BRSK2	YDL070W	0.508799	0.0527952
BRSK2	YDL071C	0.586616	-0.143434
BRSK2	YDL072C	0.457919	-0.2034
BRSK2	YDL073W	0.0508799	-0.411821
BRSK2	YDL074C	0.433976	0.421565
BRSK2	YDL076C	0.30528	-0.344263
BRSK2	YDL077C	0.796121	0.41416
BRSK2	YDL078C	1.23309	0.506847
BRSK2	YDL079C	2.54998	2.20806
BRSK2	YDL080C	0.58063	-0.143696
BRSK2	YDL085W	0.42799	-0.285602
BRSK2	YDL086W	1.3558	0.783656
BRSK2	YDL088C	0.311265	0.306269
BRSK2	YDL089W	0.188555	-0.552213
BRSK2	YDL091C	1.50245	1.17295
BRSK2	YDL093W	1.86759	0.53182
BRSK2	YDL094C	0.930803	0.545782
BRSK2	YDL095W	0.164612	-0.770001
BRSK2	YDL096C	0.422004	-0.698278
BRSK2	YDL099W	0.823058	0.738178
BRSK2	YDL100C	0.236442	-0.305009
BRSK2	YDL101C	1.11936	1.52859
BRSK2	YDL102W	0.00299294	-0.707107
BRSK2	YDL104C	0.817072	-0.368207
BRSK2	YDL107W	0.047887	-1.15899
BRSK2	YDL109C	2.70561	0.242894
BRSK2	YDL110C	0.775171	-0.486828
BRSK2	YDL112W	1.17024	-0.905331
BRSK2	YDL113C	2.69364	0.148692
BRSK2	YDL114W	0.95774	-1.08259
BRSK2	YDL117W	0.0239435	-0.880023
BRSK2	YDL118W	1.08943	0.067467
BRSK2	YDL121C	2.49012	0.770041
BRSK2	YDL122W	1.67006	0.996152
BRSK2	YDL123W	1.93942	0.193422
BRSK2	YDL124W	0.778164	-0.422334
BRSK2	YDL125C	0.365138	-0.485734
BRSK2	YDL127W	0.664432	-0.27081
BRSK2	YDL129W	1.02658	-0.730396
BRSK2	YDL130W	0.0299294	-0.789167
BRSK2	YDL131W	0.808093	-0.397805
BRSK2	YDL133W	0.353167	-0.721427
BRSK2	YDL134C	1.27798	0.111063
BRSK2	YDL134C-A	2.42727	0.826564
BRSK2	YDL135C	1.27798	-0.125596
BRSK2	YDL136W	0.607566	-0.011207
BRSK2	YDL137W	3.9387	0.0223863
BRSK2	YDL138W	4.98623	0.175693
BRSK2	YDL142C	2.78044	-0.647752
BRSK2	YDL144C	0.0239435	1.41371
BRSK2	YDL146W	0.634503	-0.532326
BRSK2	YDL149W	1.10739	-1.06244
BRSK2	YDL154W	7.81456	-0.014903
BRSK2	YDL155W	4.88148	-0.0512383
BRSK2	YDL156W	6.92266	0.0658253
BRSK2	YDL157C	3.73518	0.253203
BRSK2	YDL161W	3.77709	-0.325132
BRSK2	YDL162C	0.424997	-0.160992
BRSK2	YDL164C	0.290315	0.940921
BRSK2	YDL167C	3.6873	-0.305419
BRSK2	YDL168W	4.65402	0.64306
BRSK2	YDL169C	3.75913	0.0749546
BRSK2	YDL170W	3.97761	-0.230275
BRSK2	YDL171C	5.49503	0.678198
BRSK2	YDL172C	0.248414	-0.814047
BRSK2	YDL173W	0.535736	-0.307659
BRSK2	YDL174C	6.68323	0.323323
BRSK2	YDL176W	9.80187	0.0486295
BRSK2	YDL177C	6.56052	-0.0739213
BRSK2	YDL178W	4.09434	0.142949
BRSK2	YDL179W	2.97199	-0.0147011
BRSK2	YDL180W	8.56878	0.0870941
BRSK2	YDL182W	3.43888	-0.895214
BRSK2	YDL183C	0.748234	-0.806272
BRSK2	YDL184C	6.13552	0.747682
BRSK2	YDL186W	4.41458	-0.0326061
BRSK2	YDL187C	4.60014	-0.120371
BRSK2	YDL188C	3.86089	0.864522
BRSK2	YDL189W	5.47109	0.778695
BRSK2	YDL190C	2.08907	-0.127496
BRSK2	YDL194W	0.092781	-0.608499
BRSK2	YDL197C	2.04418	1.03331
BRSK2	YDL198C	0.0149647	-0.707107
BRSK2	YDL199C	2.08009	-0.24903
BRSK2	YDL200C	1.96935	-0.305023
BRSK2	YDL201W	1.74488	-0.205603
BRSK2	YDL202W	0.0179576	-0.933249
BRSK2	YDL203C	2.69664	-0.262785
BRSK2	YDL204W	2.72357	-0.259808
BRSK2	YDL206W	3.79205	0.642231
BRSK2	YDL207W	0.221477	0.705414
BRSK2	YDL210W	2.39136	-0.109623
BRSK2	YDL211C	0.882916	-0.508697
BRSK2	YDL213C	0.448941	0.388562
BRSK2	YDL215C	3.66335	0.349256
BRSK2	YDL216C	0.5507	0.614394
BRSK2	YDL218W	3.12762	0.0589348
BRSK2	YDL219W	2.68466	0.431404
BRSK2	YDL222C	5.7195	0.289561
BRSK2	YDL223C	2.04418	0.359241
BRSK2	YDL224C	3.7292	0.902586
BRSK2	YDL225W	1.1852	-0.293348
BRSK2	YDL226C	0.796121	-0.023221
BRSK2	YDL227C	4.12127	-0.180934
BRSK2	YDL229W	1.46355	1.00343
BRSK2	YDL230W	3.1366	0.225997
BRSK2	YDL231C	2.95403	-0.145852
BRSK2	YDL233W	1.66108	-1.0232
BRSK2	YDL234C	1.28397	-0.292634
BRSK2	YDL236W	4.03149	0.323855
BRSK2	YDL237W	1.93643	0.509553
BRSK2	YDL238C	1.38274	0.0960384
BRSK2	YDL239C	3.25332	1.70113
BRSK2	YDL240W	1.9903	0.304244
BRSK2	YDL241W	0.945768	-0.627341
BRSK2	YDL242W	2.55896	-0.341313
BRSK2	YDL243C	2.09805	-0.392712
BRSK2	YDR001C	1.38872	-0.670163
BRSK2	YDR003W	1.67604	0.128073
BRSK2	YDR004W	0.832036	2.06907
BRSK2	YDR005C	0.37711	-0.646498
BRSK2	YDR006C	5.27355	0.453361
BRSK2	YDR007W	0.095774	-0.417012
BRSK2	YDR008C	0.0239435	-1.04949
BRSK2	YDR009W	2.74752	-0.279062
BRSK2	YDR010C	1.37974	-1.00428
BRSK2	YDR011W	2.21178	-0.0341524
BRSK2	YDR014W	0.607566	-0.0832245
BRSK2	YDR015C	1.45457	-0.115119
BRSK2	YDR018C	1.77481	-0.492002
BRSK2	YDR019C	2.60685	-0.456682
BRSK2	YDR020C	0.332216	-0.0841772
BRSK2	YDR022C	3.47779	0.127857
BRSK2	YDR024W	0.0359152	-0.707107
BRSK2	YDR025W	0.00299294	-0.978324
BRSK2	YDR026C	4.46546	1.35284
BRSK2	YDR028C	1.34981	-0.292694
BRSK2	YDR029W	2.69065	-0.414235
BRSK2	YDR030C	1.27499	-1.19691
BRSK2	YDR031W	2.39435	-0.293689
BRSK2	YDR032C	0.505806	-1.14274
BRSK2	YDR033W	2.38238	-0.195228
BRSK2	YDR034C	1.02957	-0.35855
BRSK2	YDR035W	3.49874	0.22886
BRSK2	YDR036C	2.07411	0.184195
BRSK2	YDR042C	2.5021	0.113969
BRSK2	YDR043C	1.1852	-0.538975
BRSK2	YDR046C	5.14785	1.6718
BRSK2	YDR048C	0.921824	0.659204
BRSK2	YDR049W	0.092781	-0.832692
BRSK2	YDR051C	0.891895	0.0980668
BRSK2	YDR055W	0.448941	-0.664965
BRSK2	YDR056C	1.51742	-0.056545
BRSK2	YDR057W	0.661439	0.283098
BRSK2	YDR059C	1.49647	-0.0954031
BRSK2	YDR061W	1.7808	0.252093
BRSK2	YDR063W	1.64612	0.419212
BRSK2	YDR066C	1.28397	-0.532021
BRSK2	YDR067C	1.76583	-0.792841
BRSK2	YDR068W	1.46654	-0.35087
BRSK2	YDR069C	0.0838022	-0.457955
BRSK2	YDR070C	1.30193	0.138474
BRSK2	YDR072C	0.966719	0.666139
BRSK2	YDR073W	1.04753	-0.699324
BRSK2	YDR075W	1.18221	1.5474
BRSK2	YDR076W	0.733269	2.0713
BRSK2	YDR077W	0.852987	-0.323387
BRSK2	YDR078C	0.667425	-0.175511
BRSK2	YDR080W	0.484856	-0.463757
BRSK2	YDR083W	0.0239435	-0.660628
BRSK2	YDR084C	0.487849	-0.583144
BRSK2	YDR085C	1.07147	-0.304
BRSK2	YDR089W	3.36705	0.208957
BRSK2	YDR090C	2.01125	0.387063
BRSK2	YDR092W	0.0179576	-0.337191
BRSK2	YDR093W	1.42464	0.390365
BRSK2	YDR094W	0.619538	-0.697262
BRSK2	YDR095C	1.36179	-0.379905
BRSK2	YDR096W	1.25703	0.0144962
BRSK2	YDR097C	1.22411	-0.470548
BRSK2	YDR098C	0.97869	-0.0932941
BRSK2	YDR099W	0.823058	-0.549353
BRSK2	YDR100W	1.31689	0.215103
BRSK2	YDR101C	0.0688375	-0.586864
BRSK2	YDR102C	1.06249	0.155368
BRSK2	YDR104C	1.48749	0.352246
BRSK2	YDR105C	0.0718305	-0.47394
BRSK2	YDR107C	1.57428	-0.0363479
BRSK2	YDR108W	0.852987	-0.303774
BRSK2	YDR109C	1.13432	0.0243631
BRSK2	YDR110W	0.864959	-0.382857
BRSK2	YDR111C	1.50545	1.30187
BRSK2	YDR112W	1.84365	-0.230607
BRSK2	YDR115W	0.00299294	-0.569766
BRSK2	YDR116C	0.278343	-0.334813
BRSK2	YDR117C	0.149647	-1.26235
BRSK2	YDR119W	1.80773	-0.365714
BRSK2	YDR120C	0.0269364	-0.697876
BRSK2	YDR121W	0.251407	-0.759437
BRSK2	YDR122W	1.17622	-1.02179
BRSK2	YDR123C	3.92374	0.634577
BRSK2	YDR124W	2.14294	0.0632375
BRSK2	YDR125C	0.0149647	-0.55126
BRSK2	YDR126W	0.0119717	-0.487467
BRSK2	YDR128W	1.33485	0.0856658
BRSK2	YDR130C	1.14629	0.0108817
BRSK2	YDR131C	1.01461	-0.161278
BRSK2	YDR132C	0.68239	-0.208574
BRSK2	YDR133C	1.33784	-0.502022
BRSK2	YDR134C	2.00227	-0.389547
BRSK2	YDR135C	1.62516	0.522436
BRSK2	YDR136C	0.0239435	-1.2714
BRSK2	YDR138W	0.131689	-0.707107
BRSK2	YDR139C	0.637496	-0.92251
BRSK2	YDR142C	1.14929	1.23788
BRSK2	YDR143C	1.95439	0.219378
BRSK2	YDR144C	1.42164	0.371669
BRSK2	YDR146C	1.34981	-0.183573
BRSK2	YDR147W	0.365138	0.618149
BRSK2	YDR148C	0.302287	-0.680653
BRSK2	YDR150W	0.0419011	-0.958985
BRSK2	YDR151C	0.63151	-0.390266
BRSK2	YDR152W	0.933796	-0.391368
BRSK2	YDR153C	2.77146	0.0289233
BRSK2	YDR154C	0.37711	-0.0509526
BRSK2	YDR155C	0.532743	1.11911
BRSK2	YDR156W	0.0419011	-0.483201
BRSK2	YDR157W	0.808093	0.113111
BRSK2	YDR162C	0.20352	-0.805706
BRSK2	YDR163W	0.598587	1.23779
BRSK2	YDR165W	0.0179576	-0.515604
BRSK2	YDR169C	1.35879	0.402094
BRSK2	YDR171W	2.69364	0.468988
BRSK2	YDR176W	0.164612	-0.707107
BRSK2	YDR178W	0.308272	-0.776693
BRSK2	YDR179C	0.0149647	-0.458356
BRSK2	YDR179W-A	0.092781	-0.249099
BRSK2	YDR181C	0.849994	0.0766317
BRSK2	YDR183W	0.42799	-0.357452
BRSK2	YDR184C	0.622531	0.796886
BRSK2	YDR185C	1.15228	0.504018
BRSK2	YDR186C	0.110739	-0.517328
BRSK2	YDR191W	1.05052	-0.329819
BRSK2	YDR192C	0.969711	-0.124023
BRSK2	YDR193W	0.888902	-0.0523793
BRSK2	YDR194C	0.140668	-0.298334
BRSK2	YDR197W	0.15264	-0.766341
BRSK2	YDR198C	0.430983	-0.540378
BRSK2	YDR202C	0.472884	-0.426834
BRSK2	YDR203W	0.882916	1.05356
BRSK2	YDR204W	0.0838022	-0.890234
BRSK2	YDR205W	2.90315	0.92716
BRSK2	YDR206W	0.811086	0.184104
BRSK2	YDR209C	0.42799	0.0768855
BRSK2	YDR210W	1.23608	-0.168387
BRSK2	YDR213W	0.718305	-0.0289025
BRSK2	YDR214W	1.69101	0.557221
BRSK2	YDR215C	0.0897881	-0.470606
BRSK2	YDR216W	0.622531	-0.315821
BRSK2	YDR217C	0.287322	-0.504126
BRSK2	YDR218C	0.451933	-0.309227
BRSK2	YDR219C	0.161619	-0.862251
BRSK2	YDR220C	0.70334	0.141677
BRSK2	YDR221W	0.963726	0.20385
BRSK2	YDR222W	0.60158	-0.134707
BRSK2	YDR223W	1.40369	0.189327
BRSK2	YDR225W	0.0119717	-0.653317
BRSK2	YDR229W	1.31091	0.339256
BRSK2	YDR230W	0.191548	-0.797197
BRSK2	YDR231C	0.164612	-0.521518
BRSK2	YDR233C	1.47851	-0.0345308
BRSK2	YDR237W	0.113732	-0.55689
BRSK2	YDR239C	1.35879	0.0761128
BRSK2	YDR244W	1.05351	0.319047
BRSK2	YDR247W	0.826051	-0.123284
BRSK2	YDR248C	1.07147	0.750411
BRSK2	YDR249C	1.06249	0.747192
BRSK2	YDR250C	0.63151	0.00931366
BRSK2	YDR251W	0.691368	-0.264145
BRSK2	YDR252W	1.12235	0.512236
BRSK2	YDR253C	0.116725	-0.574197
BRSK2	YDR254W	0.113732	-0.605113
BRSK2	YDR255C	0.0209506	-0.735523
BRSK2	YDR256C	0.577637	-0.546941
BRSK2	YDR257C	1.19418	0.675408
BRSK2	YDR258C	0.389082	-0.836668
BRSK2	YDR259C	1.07746	0.264538
BRSK2	YDR260C	0.463905	1.01205
BRSK2	YDR261C	0.493835	-0.611603
BRSK2	YDR262W	0.113732	-0.483465
BRSK2	YDR263C	0.796121	-0.386013
BRSK2	YDR265W	0.796121	0.65513
BRSK2	YDR266C	0.143661	-0.479745
BRSK2	YDR268W	0.0209506	-1.20768
BRSK2	YDR269C	0.954747	-1.23504
BRSK2	YDR270W	0.00897881	-0.520929
BRSK2	YDR271C	0.960733	-0.25714
BRSK2	YDR272W	1.19717	0.520525
BRSK2	YDR273W	1.40668	0.668686
BRSK2	YDR274C	0.0748234	-0.850505
BRSK2	YDR275W	0.68239	0.132203
BRSK2	YDR276C	0.176583	-0.321872
BRSK2	YDR277C	0.389082	0.49701
BRSK2	YDR278C	0.0598587	-1.04264
BRSK2	YDR279W	0.0389082	-0.770617
BRSK2	YDR282C	0.0808093	-0.810529
BRSK2	YDR283C	0.149647	0.830612
BRSK2	YDR284C	0.284329	-0.148395
BRSK2	YDR285W	0.047887	-0.308975
BRSK2	YDR286C	0.272357	-0.740845
BRSK2	YDR287W	0.113732	-0.727201
BRSK2	YDR289C	0.0808093	-0.458621
BRSK2	YDR290W	2.67868	1.02721
BRSK2	YDR291W	0.571651	0.00867846
BRSK2	YDR293C	0.137675	0.0907161
BRSK2	YDR294C	0.721298	-0.0392766
BRSK2	YDR295C	0.784149	0.66355
BRSK2	YDR296W	0.0119717	-0.707107
BRSK2	YDR297W	2.22375	0.414573
BRSK2	YDR304C	0.338202	-0.536262
BRSK2	YDR305C	0.188555	-0.57093
BRSK2	YDR306C	1.02957	2.1951
BRSK2	YDR307W	0.739255	0.435251
BRSK2	YDR309C	0.442955	-0.373546
BRSK2	YDR310C	1.17024	2.24686
BRSK2	YDR312W	0.257393	-0.695471
BRSK2	YDR313C	0.496827	-0.22687
BRSK2	YDR314C	0.619538	-0.248677
BRSK2	YDR316W	0.248414	-0.391254
BRSK2	YDR317W	0.664432	0.495764
BRSK2	YDR319C	0.727284	0.379265
BRSK2	YDR320C	0.0119717	-1.30386
BRSK2	YDR321W	0.398061	-0.348549
BRSK2	YDR322W	0.179576	-0.346529
BRSK2	YDR326C	1.33784	0.272102
BRSK2	YDR329C	0.143661	-0.791745
BRSK2	YDR330W	0.176583	-0.374948
BRSK2	YDR332W	0.0419011	-1.02279
BRSK2	YDR333C	0.37711	-0.392797
BRSK2	YDR334W	0.0239435	-1.01452
BRSK2	YDR335W	0.179576	-0.0249077
BRSK2	YDR336W	0.257393	1.55443
BRSK2	YDR337W	0.0239435	-0.601467
BRSK2	YEL001C	1.22411	-0.0261106
BRSK2	YEL004W	0.787142	-0.507276
BRSK2	YEL005C	0.194541	-0.657922
BRSK2	YEL006W	0.535736	0.110285
BRSK2	YEL008W	0.194541	-0.463738
BRSK2	YEL009C	0.0688375	-0.466176
BRSK2	YEL010W	1.13732	-0.111897
BRSK2	YEL011W	2.52903	0.561207
BRSK2	YEL012W	2.16988	0.631107
BRSK2	YEL013W	0.808093	-0.261985
BRSK2	YEL014C	1.90051	0.760666
BRSK2	YEL015W	0.841015	1.20502
BRSK2	YEL016C	1.95439	0.781014
BRSK2	YEL017C-A	0.721298	-0.0856604
BRSK2	YEL017W	0.22447	-0.470698
BRSK2	YEL018W	1.12235	1.15881
BRSK2	YEL020C	0.167604	-0.765395
BRSK2	YEL023C	0.475877	-0.541292
BRSK2	YEL024W	0.239435	-0.00349279
BRSK2	YEL025C	1.99928	1.04582
BRSK2	YEL028W	1.31689	-0.485133
BRSK2	YEL030W	0.772178	-0.316897
BRSK2	YEL031W	0.110739	-0.539912
BRSK2	YEL037C	0.757213	0.0625703
BRSK2	YEL038W	1.11936	-0.0519594
BRSK2	YEL039C	1.08344	0.989532
BRSK2	YEL040W	1.10739	-0.342918
BRSK2	YEL041W	3.39998	1.08459
BRSK2	YEL042W	1.15827	0.157982
BRSK2	YEL043W	2.23273	1.47243
BRSK2	YEL047C	2.65473	-0.0772811
BRSK2	YEL048C	2.12499	0.199413
BRSK2	YEL049W	1.50844	-0.248796
BRSK2	YEL050C	0.0239435	-1.20964
BRSK2	YEL052W	2.40034	0.453899
BRSK2	YEL053C	0.849994	-0.40868
BRSK2	YEL054C	0.0269364	-0.803991
BRSK2	YEL056W	1.26901	-0.0505882
BRSK2	YEL057C	1.01461	-0.443517
BRSK2	YEL059W	2.79241	0.760633
BRSK2	YEL060C	0.951754	0.365814
BRSK2	YEL061C	0.167604	0.216696
BRSK2	YEL062W	1.57728	-0.093995
BRSK2	YEL063C	1.96337	0.616209
BRSK2	YEL064C	0.493835	-0.240477
BRSK2	YEL065W	1.06848	-0.511618
BRSK2	YEL066W	0.87693	-0.534135
BRSK2	YEL067C	3.19945	0.495661
BRSK2	YEL068C	2.45421	0.099945
BRSK2	YEL071W	1.94541	0.0387153
BRSK2	YER001W	1.11637	-0.731754
BRSK2	YER002W	0.356159	-0.148939
BRSK2	YER004W	0.628517	0.100595
BRSK2	YER005W	0.733269	-0.0952092
BRSK2	YER007C-A	0.757213	-0.269157
[truncated: 1,852 more rows]

## Sheet: CKMT1A
Table S2. Barcode counts of yeast deletion strains obtained from high-throughput sequencing.
[truncated: 2,427 more rows]

[truncated: 20 more sheets: COL4A3BP, DYRK3, EPHA4, FASTKD5, FGR, IKBKE, MAP4K3, MAPK9, MARK2, MGC42105, PAK1, PAK2, PIK3CB, PRKCE, PRKCQ, SH3BP5L, SRC, TGFBR3, TSSK2, ZAK]
