# Supplementary material for: Yeast-Based Genetic Interaction Analysis of Human Kinome
Source: Cells. 2020 May 7;9(5):1156. doi: 10.3390/cells9051156 (PMC7291280; doi:10.3390/cells9051156)
Supplement: Supplementary file 1 [file cells-09-01156-s001.zip › Supplementary_Table_S3.xlsx]

## Sheet: Suppressors
Table S3. List of toxicity modifiers for the 28 human kinases.
Query (Kinase)	Subject (yeast gene deletion)	Normalized barcode counts	Z-score
ABL1	YLR094C	4.8895	4.76215
ABL1	YDR330W	3.96685	4.36335
ABL1	YLR085C	3.02762	4.29585
ABL1	YNL289W	7.18232	4.11779
ABL1	YCR001W	3.05525	4.01052
ABL1	YOR163W	3.66851	3.96376
ABL1	YOR129C	2.51934	3.91469
ABL1	YDL052C	3.57459	3.89828
ABL1	YCL048W	2.66851	3.86327
ABL1	YER004W	2.46961	3.82432
ABL1	YCL039W	3.09392	3.82154
ABL1	YOL048C	2.65746	3.76184
ABL1	YDR274C	1.20994	3.694
ABL1	YOR321W	6.70718	3.69321
ABL1	YDL173W	2.9779	3.591
ABL1	YDL091C	3.31492	3.58823
ABL1	YAR014C	1.55249	3.58349
ABL1	YDL127W	2.06077	3.57886
ABL1	YPL113C	1.60773	3.57857
ABL1	YHR176W	1.18232	3.56959
ABL1	YDR094W	5.33149	3.55949
ABL1	YOR115C	4.39227	3.55094
ABL1	YOR245C	2.55249	3.54365
ABL1	YBR249C	3.52486	3.51522
ABL1	YBL089W	3.73481	3.51052
ABL1	YMR095C	5.58564	3.50512
ABL1	YHR135C	2.1768	3.492
ABL1	YHL008C	4.20994	3.37723
ABL1	YDR263C	3.9558	3.32424
ABL1	YCL009C	2.28729	3.31852
ABL1	YER124C	4.38674	3.315
ABL1	YBR065C	4.27072	3.31089
ABL1	YNL271C	1.1989	3.29374
ABL1	YOR289W	5.49171	3.2606
ABL1	YBL085W	3.29282	3.17557
ABL1	YER020W	5.33149	3.15168
ABL1	YIL009W	10.6575	3.13984
ABL1	YOL027C	2.02762	3.12425
ABL1	YEL063C	4.65746	3.11832
ABL1	YOR285W	5.09392	3.09237
ABL1	YHL019C	2.33702	3.05404
ABL1	YLR054C	1.01657	3.01562
ABL1	YBR068C	4.19337	3.01107
ABL1	YOR138C	0.541436	2.99185
ABL1	YPL236C	3.18232	2.98379
ABL1	YOR136W	0.845304	2.9787
ABL1	YPL256C	4.64088	2.97476
ABL1	YIL135C	6.28729	2.97079
ABL1	YOL079W	3.66298	2.97015
ABL1	YBR076W	0.116022	2.96871
ABL1	YNL115C	3.61326	2.89078
ABL1	YOR137C	0.977901	2.87586
ABL1	YHL022C	2.39779	2.87192
ABL1	YLR011W	5.62983	2.85494
ABL1	YIL064W	2.92265	2.85435
ABL1	YJL197W	2.75138	2.84752
ABL1	YHL012W	1.9116	2.79411
ABL1	YHR151C	1.83978	2.7889
ABL1	YDR139C	3.13812	2.77992
ABL1	YJL130C	2.55801	2.7401
ABL1	YMR307W	1401.04	2.71252
ABL1	YAL045C	2.1547	2.70368
ABL1	YNL254C	3.51934	2.69007
ABL1	YJR048W	3.59116	2.63569
ABL1	YNL322C	3.74586	2.5535
ABL1	YOR247W	2.66298	2.5343
ABL1	YMR152W	2.02762	2.52708
ABL1	YBL042C	1.21547	2.50959
ABL1	YPL156C	2.72376	2.49113
ABL1	YJR050W	1.86188	2.48051
ABL1	YMR246W	3.36464	2.45955
ABL1	YDL112W	4.65746	2.41367
ABL1	YHR198C	2.72928	2.40206
ABL1	YLR057W	1.98343	2.39334
ABL1	YLL006W	1.58564	2.38372
ABL1	YDR032C	3.68508	2.37631
ABL1	YAR003W	1.33149	2.37609
ABL1	YPL273W	3.10497	2.3757
ABL1	YER129W	2.29282	2.37033
ABL1	YER007W	3.16575	2.3677
ABL1	YNL120C	1.07182	2.35433
ABL1	YLR081W	3.34807	2.34847
ABL1	YMR295C	0.657459	2.33981
ABL1	YDR191W	3.66851	2.33568
ABL1	YOR012W	7.0884	2.32734
ABL1	YOR175C	0.955801	2.32052
ABL1	YER106W	3.54144	2.31814
ABL1	YDR205W	4.41436	2.29433
ABL1	YDL034W	2.97238	2.27368
ABL1	YER042W	2.32597	2.26049
ABL1	YDR272W	2.28729	2.25324
ABL1	YIL095W	2.21547	2.2462
ABL1	YJR040W	2.60773	2.23727
ABL1	YCR017C	1.22099	2.22136
ABL1	YCL062W	2.66298	2.22124
ABL1	YOR329C	1.07182	2.20994
ABL1	YLL007C	15.7403	2.20973
ABL1	YBR077C	1.71823	2.20698
ABL1	YLL014W	2.02762	2.18818
ABL1	YML081W	4.60221	2.17095
ABL1	YIL100W	0.41989	2.17003
ABL1	YPL022W	2.64641	2.16453
ABL1	YBR032W	1.38122	2.15964
ABL1	YBR250W	4.18232	2.15531
ABL1	YNL093W	2.35912	2.14775
ABL1	YJR096W	6.03867	2.1261
ABL1	YDR258C	2.58011	2.11248
ABL1	YOR055W	3.60773	2.10547
ABL1	YOR216C	2.97238	2.10417
ABL1	YOR307C	2.20994	2.09307
ABL1	YPL027W	1.73481	2.07518
ABL1	YBL013W	1.62431	2.05915
ABL1	YHR044C	2.22652	2.05731
ABL1	YDR202C	1.75138	2.05455
ABL1	YJR134C	3.32597	2.0282
ABL1	YJL141C	1.27072	2.02115
ABL1	YOR093C	4.26519	2.01977
ABL1	YNL311C	5.69613	2.00526
ABL1	YBR008C	2.76796	1.99618
ABL1	YIL024C	1.20994	1.99473
ABL1	YDL039C	3.69061	1.98769
ABL1	YOR155C	7.27624	1.98214
ABL1	YMR144W	3.40884	1.98148
ABL1	YOR252W	0.994475	1.97169
ABL1	YDR048C	1.57459	1.95192
ABL1	YHR153C	1.58564	1.92309
ABL1	YOR100C	1.85083	1.92243
ABL1	YPL260W	1.08287	1.92138
ABL1	YPR004C	1.43646	1.90924
ABL1	YPL019C	1	1.88502
ABL1	YPL177C	3.60221	1.88289
ABL1	YOR374W	1.91713	1.87463
ABL1	YPL067C	2.69613	1.85199
ABL1	YHR156C	1.53591	1.85178
ABL1	YJR004C	5.10497	1.82939
ABL1	YJR036C	3.22652	1.81885
ABL1	YPL174C	0.966851	1.81743
ABL1	YDL133W	2.09392	1.79492
ABL1	YDR316W	1.1105	1.79252
ABL1	YBL049W	3.85635	1.78228
ABL1	YLR030W	4.35912	1.78197
ABL1	YIL140W	4.08287	1.76782
ABL1	YAL054C	3.8674	1.76402
ABL1	YMR244C-A	0.944751	1.76236
ABL1	YBR020W	2.8232	1.73032
ABL1	YBR159W	0.546961	1.72816
ABL1	YLL039C	1.46409	1.72487
ABL1	YBR239C	2.8011	1.71297
ABL1	YDR028C	4.86188	1.70452
ABL1	YJR077C	1.16022	1.69552
ABL1	YLR032W	1.09392	1.69291
ABL1	YDR157W	1.93923	1.68514
ABL1	YNL196C	0.933702	1.67727
ABL1	YDR095C	3.54696	1.66591
ABL1	YNL224C	1.23757	1.66417
ABL1	YJR054W	2.23757	1.65386
ABL1	YDR123C	5.1547	1.64324
ABL1	YDR067C	9.23204	1.63154
ABL1	YHL029C	6.02762	1.61629
ABL1	YCR022C	1.43646	1.61356
ABL1	YEL065W	2.83425	1.59137
ABL1	YDR223W	2.46961	1.58576
ABL1	YBR222C	1.9337	1.58497
ABL1	YMR119W-A	3.44751	1.55067
ABL1	YDR268W	1.1768	1.52272
ABL1	YML020W	1.83425	1.50375
ABL1	YDR275W	1.39779	1.49974
ABL1	YOR172W	1.51934	1.49428
ABL1	YLR043C	2.12155	1.49172
ABL1	YLR224W	4.8011	1.48883
ABL1	YLR110C	1.85083	1.47967
ABL1	YJL126W	3.51381	1.47686
ABL1	YLR189C	2.14365	1.47185
ABL1	YBR101C	1.64088	1.47005
ABL1	YOR139C	0.883978	1.46106
ABL1	YBL053W	2.80663	1.45421
ABL1	YEL068C	4.38674	1.45248
ABL1	YER060W	3.76243	1.45027
ABL1	YDL095W	0.823204	1.44692
ABL1	YML053C	2.1547	1.43798
ABL1	YMR178W	2.63536	1.4329
ABL1	YDR257C	1.62983	1.42035
ABL1	YHR006W	5.24309	1.41459
ABL1	YBR015C	0.933702	1.40966
ABL1	YER120W	0.779006	1.39357
ABL1	YOR018W	2.81768	1.3736
ABL1	YDR051C	1.36464	1.37358
ABL1	YDL113C	4.18232	1.36498
ABL1	YLR137W	1.90055	1.35986
ABL1	YCR020C	0.839779	1.35928
ABL1	YBL022C	0.58011	1.3521
ABL1	YHL046C	1.0442	1.33963
ABL1	YPL109C	1.14365	1.3395
ABL1	YHR159W	1.38122	1.33524
ABL1	YLL026W	2.13812	1.31584
ABL1	YCL044C	0.856354	1.31444
ABL1	YJL146W	1.26519	1.3139
ABL1	YNL144C	2.90055	1.30212
ABL1	YBR047W	2.67403	1.28553
ABL1	YDR153C	5.23757	1.24637
ABL1	YML057W	2.39227	1.24127
ABL1	YPL084W	1.12155	1.23838
ABL1	YER046W-A	0.928177	1.22819
ABL1	YER140W	2.70166	1.2221
ABL1	YHR028C	3.49724	1.19255
ABL1	YBR263W	2.87845	1.1908
ABL1	YOR124C	1.66298	1.18597
ABL1	YJL037W	6.73481	1.18497
ABL1	YOL083W	1.06077	1.16596
ABL1	YAR020C	1.71271	1.16235
ABL1	YOR379C	3.76796	1.15155
ABL1	YOR050C	3.23757	1.14384
ABL1	YJR140C	0.955801	1.14355
ABL1	YIL130W	2.8895	1.14154
ABL1	YNL168C	1.79006	1.12538
ABL1	YDR042C	3.82873	1.10882
ABL1	YBL071C	0.585635	1.10863
ABL1	YML032C-A	1.56354	1.0856
ABL1	YDL233W	5.67403	1.08445
ABL1	YLR219W	1.1547	1.08118
ABL1	YDL038C	1.07735	1.08114
ABL1	YLR036C	2.00552	1.07995
ABL1	YDR007W	0.530387	1.07546
ABL1	YMR023C	1.19337	1.07355
ABL1	YEL056W	2.34807	1.07037
ABL1	YBR227C	2.30939	1.069
ABL1	YMR230W	0.58011	1.06355
ABL1	YPL002C	0.872928	1.06264
ABL1	YDL241W	2.1989	1.05842
ABL1	YOL006C	1.1105	1.05832
ABL1	YJR035W	3.24309	1.05147
ABL1	YJR087W	4.64641	1.04459
ABL1	YOR361C	1.18785	1.04262
ABL1	YIL069C	0.950276	1.03874
ABL1	YJR084W	1.98895	1.03338
ABL1	YLR201C	0.977901	1.03243
ABL1	YJR146W	13.8785	1.02678
ABL1	YNL279W	5.71823	1.02553
ABL1	YJL147C	1.65193	1.01814
ABL1	YDL187C	6.40331	1.01078
ABL1	YPL154C	3.43094	1.00109
ABL1	YNL295W	2.81768	0.993641
ABL1	YMR195W	2.77348	0.985294
ABL1	YER118C	1.06077	0.98409
ABL1	YDL009C	1.26519	0.977059
ABL1	YER123W	1.29282	0.958036
ABL1	YHR105W	1.18785	0.953846
ABL1	YJL142C	2.77901	0.951126
ABL1	YMR006C	3.06077	0.944844
ABL1	YAR027W	1.0442	0.943839
ABL1	YJL108C	2.45856	0.94222
ABL1	YMR199W	1.61878	0.937938
ABL1	YMR174c	1.77348	0.937144
ABL1	YIL161W	2.16022	0.93383
ABL1	YNL143C	3.75691	0.931842
ABL1	YMR286W	0.348066	0.922876
ABL1	YDR169C	1.76796	0.919663
ABL1	YNL336W	4.25414	0.915964
ABL1	YHR046C	0.364641	0.909246
ABL1	YDR233C	2.42541	0.907386
ABL1	YEL067C	3.71271	0.899171
ABL1	YER051W	0.480663	0.898174
ABL1	YBR172C	1.81768	0.889479
ABL1	YPL202C	0.596685	0.883219
ABL1	YMR244W	1.30387	0.88269
ABL1	YHL024W	1.9558	0.8816
ABL1	YPL132W	1.49171	0.878233
ABL1	YML118W	1.35912	0.875068
ABL1	YLR019W	10.3315	0.873443
ABL1	YDL239C	2.53039	0.867416
ABL1	YDR003W	2.18785	0.861885
ABL1	YML119W	2.02762	0.859528
ABL1	YPL144W	0.646409	0.850033
ABL1	YOR037W	3.92818	0.845954
ABL1	YPL110C	1.86188	0.838221
ABL1	YPL037C	0.668508	0.837961
ABL1	YOR033C	0.834254	0.830709
ABL1	YPL226W	4.71823	0.830603
ABL1	YAL002W	1.1105	0.8275
ABL1	YDL189W	5.54144	0.822389
ABL1	YJL170C	1.61326	0.820496
ABL1	YOR153W	2.53039	0.817022
ABL1	YHR047C	1.39779	0.816866
ABL1	YNL187W	0.674033	0.814217
ABL1	YER138C-A	0.950276	0.802936
ABL1	YOR059C	6.06077	0.80216
ABL1	YPL196W	2.44199	0.799939
ABL1	YJL199C	0.972376	0.799934
ABL1	YBL012C	1.45856	0.794875
ABL1	YOR371C	0.61326	0.794169
ABL1	YJR130C	1.83425	0.780591
ABL1	YBL045C	1.66298	0.776843
ABL1	YNL116W	1.89503	0.774037
ABL1	YOR348C	2.58011	0.769837
ABL1	YJR083C	1.71271	0.767746
ABL1	YDL183C	2.0442	0.767157
ABL1	YOR085W	0.944751	0.749158
ABL1	YDR162C	1.13812	0.748151
ABL1	YAL007C	1.14917	0.744558
ABL1	YHR207C	0.972376	0.741304
ABL1	YMR315W	3.34807	0.740414
ABL1	YJL217W	1.54144	0.722781
ABL1	YMR191W	1.86188	0.720418
ABL1	YDR310C	0.635359	0.718381
ABL1	YNL056W	9.60773	0.712531
ABL1	YMR097C	0.585635	0.707107
ABL1	YBR133C	1	0.707107
ABL1	YNL181W	0.585635	0.707107
ABL1	YDR068W	2.69613	0.704126
ABL1	YLR124W	2.01657	0.701937
ABL1	YIL160C	1.83425	0.699395
ABL1	YLR123C	2.48619	0.698604
ABL1	YOL058W	2.28729	0.695178
ABL1	YOR243C	0.917127	0.695143
ABL1	YML012W	0.944751	0.693531
ABL1	YOR274W	0.696133	0.692747
ABL1	YML035C-A	1.04972	0.685788
ABL1	YBL060W	0.81768	0.679465
ABL1	YJR111C	0.640884	0.675033
ABL1	YLR174W	1.0221	0.673766
ABL1	YJR094C	4.73481	0.666342
ABL1	YJL012C	1.03315	0.657172
ABL1	YPL136W	1.22099	0.647953
ABL1	YBR226C	2.61878	0.647434
ABL1	YOR326W	0.906077	0.644055
ABL1	YJL133W	1.54696	0.634507
ABL1	YAL040C	0.441989	0.629363
ABL1	YJR119C	2.94475	0.62734
ABL1	YER055C	2.19337	0.626525
ABL1	YPL073C	0.944751	0.613283
ABL1	YBR023C	0.79558	0.613135
ABL1	YDL018C	1.1326	0.582807
ABL1	YPL032C	2.20442	0.578027
ABL1	YJL214W	2.07182	0.565415
ABL1	YLR097C	1.8011	0.559771
ABL1	YJR152W	2.74033	0.556263
ABL1	YIL073C	2.39227	0.555998
ABL1	YBL095W	2.9337	0.550899
ABL1	YAL043C-	0.519337	0.53311
ABL1	YPL269W	0.441989	0.523627
ABL1	YMR106C	1.85635	0.523445
ABL1	YDL223C	2.1989	0.519155
ABL1	YPL108W	0.679558	0.50564
ABL1	YML011C	3.45304	0.501778
ABL1	YJL187C	2.11602	0.488668
ABL1	YHR210C	0.878453	0.488018
ABL1	YMR035W	0.994475	0.482052
ABL1	YER093C-A	2.07182	0.479286
ABL1	YOL084W	2.48066	0.478511
ABL1	YDL096C	0.972376	0.470343
ABL1	YMR039C	1.23757	0.469558
ABL1	YJR019C	2.44199	0.466219
ABL1	YJL124C	1.10497	0.465245
ABL1	YHL023C	1.58564	0.463069
ABL1	YOR045W	1.50829	0.462722
ABL1	YDL099W	0.701657	0.449472
ABL1	YDR282C	0.430939	0.447891
ABL1	YAL017W	1.1326	0.447326
ABL1	YMR011W	1.12707	0.446223
ABL1	YOR185C	0.939227	0.443124
ABL1	YHR204W	0.80663	0.440594
ABL1	YDL199C	2.90055	0.433553
ABL1	YLR209C	2.07182	0.430971
ABL1	YML117W-A	1.34254	0.425093
ABL1	YNL146W	2.85083	0.422491
ABL1	YBL083C	0.524862	0.421529
ABL1	YER103W	0.977901	0.417585
ABL1	YMR103C	1.46409	0.411102
ABL1	YOR368W	1.01105	0.410812
ABL1	YJL027C	2.51934	0.408007
ABL1	YCL074W	3.1326	0.407675
ABL1	YDR185C	1.0884	0.405921
ABL1	YOR202W	1.06077	0.39936
ABL1	YAL037W	1.02762	0.39351
ABL1	YLR171W	1.12707	0.392631
ABL1	YCL026C	1.02762	0.38483
ABL1	YOR028C	3.16575	0.384533
ABL1	YIL099W	2.21547	0.377852
ABL1	YNL072W	2.30939	0.370238
ABL1	YLL056C	2.66298	0.367189
ABL1	YPL039W	1.09392	0.349968
ABL1	YLR172C	0.828729	0.349882
ABL1	YDR214W	1.51934	0.347654
ABL1	YLR096W	1.51934	0.344424
ABL1	YEL071W	2.24862	0.343765
ABL1	YNL211C	0.458564	0.343277
ABL1	YMR147W	2.87293	0.340825
ABL1	YPL099C	1.63536	0.339936
ABL1	YDR198C	0.823204	0.32301
ABL1	YOR384W	2.1768	0.321027
ABL1	YBL003C	0.740331	0.319858
ABL1	YMR161W	4.0663	0.316216
ABL1	YDL155W	5.54144	0.314208
ABL1	YLR136C	0.674033	0.313984
ABL1	YBR129C	0.828729	0.310915
ABL1	YPL219W	1.14917	0.303741
ABL1	YDL012C	1.30387	0.294461
ABL1	YDL210W	2.81768	0.294029
ABL1	YJL158C	1.18232	0.290165
ABL1	YJR102C	0.80663	0.285785
ABL1	YJL057C	1.9337	0.285527
ABL1	YOR284W	1.30387	0.285123
ABL1	YOR315W	0.98895	0.283685
ABL1	YHL042W	2.45304	0.279756
ABL1	YOR067C	2.01105	0.276275
ABL1	YOR313C	2.48066	0.260693
ABL1	YLR131C	3.13812	0.259879
ABL1	YDL146W	1.63536	0.254286
ABL1	YOR142W	1.98343	0.248964
ABL1	YCR010C	0.933702	0.246398
ABL1	YJL095W	0.856354	0.243442
ABL1	YAL028W	1.85083	0.242074
ABL1	YMR015C	1.68508	0.239092
ABL1	YEL004W	1.47514	0.237668
ABL1	YBL081W	0.906077	0.23686
ABL1	YPL166W	2.20994	0.236513
ABL1	YOR126C	2.75691	0.234429
ABL1	YPL267W	1.09945	0.228136
ABL1	YPL119C	1.71823	0.22751
ABL1	YEL017C-A	0.939227	0.226576
ABL1	YDR117C	1	0.21964
ABL1	YER175C	1.1547	0.218699
ABL1	YIL164C	1.79558	0.218614
ABL1	YML006C	0.977901	0.216814
ABL1	YDL121C	1.98895	0.214942
ABL1	YBR185C	1.8453	0.211046
ABL1	YNL195C	2.10497	0.209037
ABL1	YER114C	0.662983	0.206316
ABL1	YJL045W	2.89503	0.201753
ABL1	YLR130C	1.0663	0.201741
ABL1	YJL198W	0.767956	0.196586
ABL1	YCL076W	3.46409	0.189658
ABL1	YER028C	1.62983	0.188182
ABL1	YNL183C	1.98343	0.188165
ABL1	YIL145C	1.99448	0.18687
ABL1	YNL303W	1.27072	0.18446
ABL1	YDL118W	1.1989	0.179652
ABL1	YMR318C	3.28177	0.176764
ABL1	YDR063W	1.43094	0.173266
ABL1	YJL060W	3.48066	0.166712
ABL1	YIR016W	4.62983	0.165526
ABL1	YOR017W	1.27624	0.160942
ABL1	YJL042W	3.62983	0.150917
ABL1	YJR033C	1.01657	0.149317
ABL1	YIL163C	2.20442	0.146468
ABL1	YLR183C	0.740331	0.145217
ABL1	YMR284W	1.48066	0.140519
ABL1	YPL163C	1.23757	0.134352
ABL1	YLR120C	0.436464	0.133725
ABL1	YBR230C	2.99448	0.133451
ABL1	YAR023C	0.607735	0.129872
ABL1	YHR179W	0.651934	0.124128
ABL1	YNL190W	1.28729	0.122689
ABL1	YAL018C	0.950276	0.121531
ABL1	YML096W	1.48066	0.11996
ABL1	YBR072W	1.76243	0.118011
ABL1	YJL169W	0.740331	0.115883
ABL1	YLR020C	1.48066	0.110574
ABL1	YBL104C	0.933702	0.110515
ABL1	YBR259W	2.14917	0.108941
ABL1	YNL326C	1.81768	0.101173
ABL1	YOR354C	1.40331	0.101173
ABL1	YOR066W	0.535912	0.0963197
ABL1	YNL058C	0.834254	0.094837
ABL1	YDL238C	1.38122	0.0941016
ABL1	YBR208C	1.01657	0.0938286
ABL1	YPL263C	1.68508	0.0936963
ABL1	YML100W-A	1.14365	0.0920466
ABL1	YIL054W	1.32597	0.089216
ABL1	YHR150W	0.679558	0.0835897
ABL1	YDR247W	0.955801	0.0763208
ABL1	YAL061W	1.25414	0.0759017
ABL1	YJR008W	1.0663	0.072899
ABL1	YBL067C	1.1989	0.0710621
ABL1	YIL114C	2.0663	0.0695446
ABL1	YER062C	0.80663	0.0657732
ABL1	YIL013C	1.25967	0.0593944
ABL1	YBL015W	1.16575	0.0546607
ABL1	YNL286W	0.646409	0.0478665
ABL1	YAL051W	0.944751	0.0450334
ABL1	YJL134W	4.04972	0.0444783
ABL1	YDL114W	2.12155	0.0429563
ABL1	YOL047C	1.16022	0.0377601
ABL1	YJR103W	0.878453	0.0336541
ABL1	YNL129W	2.72376	0.029659
ABL1	YBL091C	1.01657	0.0270804
ABL1	YMR163C	1.8674	0.0267087
ABL1	YPL130W	1.1547	0.0250221
ABL1	YNL071W	0.690608	0.0235363
ABL1	YMR041C	1.53039	0.0177769
ABL1	YCL001W	0.596685	0.017092
ABL1	YIL105C	1.03867	0.0157986
ABL1	YEL053C	1.22099	0.0119838
ABL1	YNL300W	1.12155	0.0102281
ABL1	YBR214W	0.668508	0.00929153
ABL1	YDR020C	0.359116	0.0079733
ABL1	YDR077W	1.09392	0.0032811
ACVR1	YAL027W	5.40567	4.41387
ACVR1	YDL061C	1.55675	3.58941
ACVR1	YDL012C	3.80947	3.22812
ACVR1	YBL101C	50.6051	3.13673
ACVR1	YPL274W	3.97853	2.87394
ACVR1	YMR264W	4.03911	2.6063
ACVR1	YOR240W	1.6441	2.56942
ACVR1	YIL072W	1.51026	2.47457
ACVR1	YDR186C	1.10875	2.4599
ACVR1	YMR170C	10.5141	2.45167
ACVR1	YDR258C	2.79652	2.40381
ACVR1	YIL055C	4.69421	2.27135
ACVR1	YML099C	2.44995	2.24172
ACVR1	YIL045W	1.84697	2.2337
ACVR1	YMR195W	4.11941	2.22316
ACVR1	YHL003C	11.9229	2.22249
ACVR1	YNL099C	9.50536	2.20294
ACVR1	YNL195C	4.42231	2.18328
ACVR1	YAL060W	2.80357	2.11866
ACVR1	YMR276W	5.07319	2.03239
ACVR1	YMR010W	2.81484	2.02804
ACVR1	YDR290W	3.5263	2.01464
ACVR1	YOR371C	0.950959	2.01459
ACVR1	YJL212C	3.68408	1.91971
ACVR1	YMR164C	2.91486	1.85539
ACVR1	YHL029C	6.49329	1.85205
ACVR1	YML122C	3.2403	1.83954
ACVR1	YOR097C	1.26372	1.83219
ACVR1	YNL239W	2.10902	1.81046
ACVR1	YMR280C	3.67986	1.75714
ACVR1	YOR010C	6.78491	1.7388
ACVR1	YIL038C	22.2186	1.7271
ACVR1	YMR180C	3.94613	1.71279
ACVR1	YDL211C	2.30202	1.7058
ACVR1	YLL030C	5.1549	1.70278
ACVR1	YDR033W	4.48571	1.70049
ACVR1	YMR278W	4.13491	1.68236
ACVR1	YJL119C	6.06782	1.67272
ACVR1	YDR143C	3.15718	1.64886
ACVR1	YDR028C	4.74071	1.63563
ACVR1	YER098W	5.61418	1.61446
ACVR1	YDL072C	1.21159	1.60954
ACVR1	YDR056C	3.51362	1.60952
ACVR1	YML096W	2.58943	1.60894
ACVR1	YHL034C	1.62156	1.60625
ACVR1	YLL007C	13.1697	1.59635
ACVR1	YDL200C	6.77646	1.57779
ACVR1	YER108C	1.34684	1.5761
ACVR1	YLR119W	3.33892	1.57051
ACVR1	YJL064W	6.21434	1.56242
ACVR1	YDL096C	1.48068	1.54968
ACVR1	YML058C-A	1.40037	1.49493
ACVR1	YIL086C	2.22454	1.48287
ACVR1	YLR131C	5.617	1.47524
ACVR1	YOR304C-A	1.36515	1.47185
ACVR1	YER033C	1.0848	1.453
ACVR1	YMR115W	0.846705	1.44838
ACVR1	YCL035C	1.21723	1.44516
ACVR1	YER041W	0.977726	1.43919
ACVR1	YNL056W	12.9119	1.43368
ACVR1	YML071C	1.82161	1.41439
ACVR1	YDL236W	6.54823	1.41404
ACVR1	YJL178C	1.16792	1.40587
ACVR1	YMR022W	4.38568	1.40029
ACVR1	YHR108W	0.594525	1.39245
ACVR1	YJR073C	0.950959	1.38902
ACVR1	YER066W	2.93459	1.38071
ACVR1	YPL115C	1.14538	1.3628
ACVR1	YAL056W	1.74554	1.35999
ACVR1	YML012W	1.24118	1.357
ACVR1	YBR083W	2.00335	1.34433
ACVR1	YHR110W	1.54548	1.33984
ACVR1	YJL135W	4.75902	1.32939
ACVR1	YHR077C	1.0538	1.3254
ACVR1	YLR013W	2.14283	1.30364
ACVR1	YOR029W	3.26284	1.30335
ACVR1	YHR115C	0.969273	1.30153
ACVR1	YAL002W	1.37502	1.28868
ACVR1	YMR237W	0.757949	1.28573
ACVR1	YJL121C	0.440963	1.27219
ACVR1	YNL090W	2.3612	1.2714
ACVR1	YOR023C	2.82188	1.24943
ACVR1	YBR059C	4.25466	1.24599
ACVR1	YOR275C	2.08788	1.24568
ACVR1	YPL032C	2.74299	1.24493
ACVR1	YEL062W	3.25017	1.23677
ACVR1	YDR067C	7.99791	1.23083
ACVR1	YJL134W	6.52428	1.22994
ACVR1	YDL154W	11.0917	1.22213
ACVR1	YOR163W	1.76103	1.21849
ACVR1	YMR319C	2.67255	1.21538
ACVR1	YML100W-A	1.94559	1.20785
ACVR1	YLR014C	1.64974	1.18331
ACVR1	YMR015C	2.70777	1.17523
ACVR1	YNL117W	0.154971	1.1675
ACVR1	YJL020C	1.95123	1.15109
ACVR1	YIR001C	4.45894	1.14216
ACVR1	YMR036C	1.07916	1.12695
ACVR1	YJL107C	7.79786	1.11282
ACVR1	YIL011W	1.71595	1.11062
ACVR1	YMR150C	1.20032	1.1099
ACVR1	YPL014W	1.82584	1.09727
ACVR1	YJR059W	0.819938	1.09333
ACVR1	YEL042W	1.88783	1.08757
ACVR1	YER120W	0.686099	1.08703
ACVR1	YNL299W	0.501543	1.07284
ACVR1	YML080W	1.31725	1.06248
ACVR1	YLR028C	3.40232	1.06022
ACVR1	YBR033W	1.83148	1.05611
ACVR1	YML113W	1.72581	1.05059
ACVR1	YJR092W	4.39132	1.04946
ACVR1	YOR267C	1.15242	1.04061
ACVR1	YNL098C	1.4835	1.03873
ACVR1	YHR004C	0.38461	1.0371
ACVR1	YML088W	2.62605	1.03418
ACVR1	YNL051W	1.45955	1.02872
ACVR1	YHL026C	1.11579	1.02742
ACVR1	YER183C	0.894606	1.00966
ACVR1	YIL137C	2.92895	1.00956
ACVR1	YCL073C	2.76412	1.00608
ACVR1	YDL134C-A	2.59506	1.0055
ACVR1	YPL176C	1.59761	1.00443
ACVR1	YML054C	1.2919	1.0043
ACVR1	YML053C	1.85824	1.00022
ACVR1	YBR212W	1.90474	0.991797
ACVR1	YDR326C	1.84697	0.982345
ACVR1	YJR102C	1.15947	0.98058
ACVR1	YBR050C	5.65785	0.970993
ACVR1	YAL014C	1.50181	0.961353
ACVR1	YNL294C	3.14309	0.953635
ACVR1	YMR232W	2.64437	0.953394
ACVR1	YNL283C	1.12424	0.952861
ACVR1	YIL066C	5.1704	0.952066
ACVR1	YPL182C	1.27076	0.949275
ACVR1	YJL153C	1.09889	0.941742
ACVR1	YIL089W	6.45807	0.939572
ACVR1	YPL232W	2.37669	0.939278
ACVR1	YLR211C	1.48631	0.934733
ACVR1	YAL043C-	0.63679	0.931827
ACVR1	YAL023C	0.26486	0.928498
ACVR1	YJR131W	4.49557	0.920056
ACVR1	YOR082C	2.49222	0.919475
ACVR1	YPL096W	0.787535	0.915904
ACVR1	YDL156W	8.91084	0.9152
ACVR1	YMR163C	2.7768	0.914635
ACVR1	YNL257C	6.82436	0.913105
ACVR1	YMR274C	3.44317	0.91075
ACVR1	YOR091W	1.38347	0.90009
ACVR1	YBR058C	1.76385	0.892551
ACVR1	YPR004C	1.01576	0.891435
ACVR1	YER005W	1.43982	0.890295
ACVR1	YML068W	2.23863	0.888846
ACVR1	YER063W	2.93459	0.88381
ACVR1	YJL101C	1.67087	0.881996
ACVR1	YJL022W	0.85375	0.880292
ACVR1	YMR216C	1.46095	0.876805
ACVR1	YCL074W	3.54038	0.873191
ACVR1	YLL057C	2.4584	0.872543
ACVR1	YAR040C	1.35107	0.865491
ACVR1	YIL077C	1.42432	0.863368
ACVR1	YMR016C	1.66383	0.862714
ACVR1	YER160C-A	0.632564	0.857752
ACVR1	YIL098C	2.5528	0.852855
ACVR1	YJL103C	1.94982	0.85185
ACVR1	YIL138C	1.65537	0.850217
ACVR1	YBR006W	0.866429	0.848411
ACVR1	YLR006C	1.36656	0.848219
ACVR1	YER145C-A	0.860794	0.847664
ACVR1	YML120C	2.12592	0.847342
ACVR1	YJL170C	1.62297	0.835589
ACVR1	YER103W	1.18905	0.829244
ACVR1	YPL087W	1.53844	0.829167
ACVR1	YIL160C	1.91601	0.807184
ACVR1	YBR013C	2.09634	0.791133
ACVR1	YDR123C	4.11378	0.790282
ACVR1	YPL145C	2.7613	0.785533
ACVR1	YDR229W	1.60184	0.774161
ACVR1	YLR025W	1.41305	0.772845
ACVR1	YDL041W	0.308533	0.772797
ACVR1	YMR191W	1.90474	0.772519
ACVR1	YMR039C	1.51308	0.770391
ACVR1	YOR067C	2.6021	0.766763
ACVR1	YJL055W	2.50771	0.763634
ACVR1	YEL057C	1.8357	0.763227
ACVR1	YMR251W	1.83007	0.760365
ACVR1	YMR002W	1.06366	0.753008
ACVR1	YJR094C	4.88722	0.751997
ACVR1	YJL185C	0.787535	0.750436
ACVR1	YDR026C	3.7348	0.746627
ACVR1	YML066C	3.22199	0.741005
ACVR1	YHR185C	2.00335	0.739731
ACVR1	YMR184W	2.15973	0.737932
ACVR1	YEL039C	0.965047	0.730442
ACVR1	YJR110W	1.82584	0.730047
ACVR1	YLR107W	2.12029	0.729929
ACVR1	YAR027W	0.945323	0.727418
ACVR1	YLL051C	2.67677	0.723846
ACVR1	YAR030C	1.32571	0.719931
ACVR1	YBR027C	0.742452	0.717009
ACVR1	YJR116W	4.37723	0.716346
ACVR1	YHR133C	0.74527	0.715553
ACVR1	YER173W	5.00697	0.714698
ACVR1	YML051W	2.34429	0.711413
ACVR1	YDL199C	3.23185	0.709213
ACVR1	YML004C	1.31444	0.708792
ACVR1	YDL198C	0.0352207	0.707107
ACVR1	YDR296W	0.0633972	0.707107
ACVR1	YHL033C	0.0126794	0.707107
ACVR1	YMR228W	0.0352207	0.707107
ACVR1	YIL167W	2.31048	0.701662
ACVR1	YIL056W	5.73534	0.699184
ACVR1	YJL105W	1.05521	0.694496
ACVR1	YDR122W	3.05997	0.692844
ACVR1	YPL222W	1.1172	0.692274
ACVR1	YAL045C	1.08198	0.691828
ACVR1	YER184C	1.43278	0.689359
ACVR1	YIL105C	1.46095	0.689152
ACVR1	YEL049W	2.75848	0.684981
ACVR1	YMR017W	1.79344	0.683821
ACVR1	YBL061C	1.49758	0.682052
ACVR1	YHR104W	0.85375	0.679809
ACVR1	YER142C	1.00872	0.679102
ACVR1	YLR111W	0.735408	0.675523
ACVR1	YLR012C	2.39782	0.674672
ACVR1	YOR068C	4.68576	0.670921
ACVR1	YML102W	0.431101	0.670762
ACVR1	YMR154C	5.99315	0.670283
ACVR1	YPL002C	0.726955	0.667568
ACVR1	YBR177C	1.22568	0.66373
ACVR1	YMR009W	1.86247	0.663277
ACVR1	YLR104W	1.90192	0.660341
ACVR1	YPL154C	3.01489	0.655942
ACVR1	YDR204W	0.401516	0.653285
ACVR1	YDR059C	2.20763	0.650702
ACVR1	YIL114C	2.70636	0.650037
ACVR1	YCL050C	0.927009	0.647902
ACVR1	YHL007C	0.428284	0.646393
ACVR1	YMR289W	1.3891	0.643238
ACVR1	YMR283C	2.44854	0.641297
ACVR1	YAR043C	0.590299	0.634471
ACVR1	YER011W	1.17214	0.634216
ACVR1	YBR229C	3.01348	0.63103
ACVR1	YER020W	2.4894	0.626167
ACVR1	YIR014W	4.67449	0.615767
ACVR1	YML050W	3.19381	0.615715
ACVR1	YML052W	2.14564	0.610491
ACVR1	YJL144W	1.19328	0.610376
ACVR1	YHR092C	1.09325	0.609768
ACVR1	YCR023C	1.18482	0.609101
ACVR1	YIR013C	4.16027	0.608932
ACVR1	YDR250C	0.91292	0.607952
ACVR1	YJL159W	0.650878	0.60721
ACVR1	YOR304W	2.4584	0.603707
ACVR1	YNL305C	2.34992	0.600089
ACVR1	YLR097C	1.8357	0.598108
ACVR1	YJL217W	1.43419	0.597591
ACVR1	YAL051W	1.26513	0.595247
ACVR1	YLL038C	0.549443	0.593592
ACVR1	YHL002W	4.9154	0.592396
ACVR1	YML056C	1.43841	0.591072
ACVR1	YMR109W	2.5218	0.589681
ACVR1	YDR334W	0.245136	0.588529
ACVR1	YLR451W	0.672011	0.588156
ACVR1	YOR152C	7.26532	0.582602
ACVR1	YNL201C	1.24822	0.582335
ACVR1	YML001W	1.30739	0.57679
ACVR1	YPL019C	0.614249	0.575914
ACVR1	YJL016W	3.63055	0.574735
ACVR1	YMR147W	3.16704	0.573482
ACVR1	YIL119C	1.07353	0.573027
ACVR1	YHR097C	1.16651	0.569305
ACVR1	YDL201W	2.87683	0.569069
ACVR1	YHR078W	1.34966	0.568057
ACVR1	YNL083W	2.01603	0.567903
ACVR1	YMR192W	2.36542	0.566045
ACVR1	YCL008C	1.1172	0.563049
ACVR1	YHR195W	0.69737	0.558955
ACVR1	YPL159C	1.5638	0.557757
ACVR1	YIL124W	2.0752	0.557093
ACVR1	YIL052C	1.31444	0.556808
ACVR1	YOR003W	2.44291	0.556802
ACVR1	YBR260C	1.87797	0.556367
ACVR1	YJR142W	1.67932	0.556181
ACVR1	YOL013C	2.17946	0.554371
ACVR1	YAL053W	1.75963	0.553914
ACVR1	YHR033W	2.56829	0.553419
ACVR1	YOR357C	2.37528	0.550797
ACVR1	YNL292W	1.2609	0.54606
ACVR1	YHL027W	1.43137	0.544987
ACVR1	YJL148W	0.883335	0.544901
ACVR1	YBL099W	0.497316	0.544849
ACVR1	YBL028C	0.595934	0.539926
ACVR1	YAL021C	0.398698	0.53936
ACVR1	YMR008C	1.76526	0.538881
ACVR1	YJR140C	0.742452	0.538098
ACVR1	YMR189W	2.12451	0.532383
ACVR1	YML042W	2.15973	0.532195
ACVR1	YBR074W	2.99235	0.53074
ACVR1	YPL103C	0.857976	0.528923
ACVR1	YER073W	2.66973	0.526204
ACVR1	YAL011W	0.50436	0.52595
ACVR1	YDR192C	1.46095	0.525825
ACVR1	YJL210W	1.93009	0.523716
ACVR1	YLR114C	1.93855	0.523654
ACVR1	YNL134C	2.32175	0.522013
ACVR1	YAL066W	0.869247	0.521612
ACVR1	YDR035W	3.92218	0.521201
ACVR1	YDR310C	0.566349	0.521198
ACVR1	YML082W	2.7134	0.520677
ACVR1	YJR083C	1.51308	0.520113
ACVR1	YIL135C	2.57534	0.519527
ACVR1	YIL092W	3.78693	0.51667
ACVR1	YML117W-A	1.40601	0.516212
ACVR1	YJL027C	2.61478	0.514036
ACVR1	YAL067C	2.03857	0.513028
ACVR1	YOR083W	3.48121	0.512545
ACVR1	YNL068C	1.84697	0.510073
ACVR1	YIL163C	2.53871	0.509135
ACVR1	YER156C	0.781899	0.508167
ACVR1	YDL189W	5.03233	0.505808
ACVR1	YBL046W	0.366295	0.504965
ACVR1	YMR291W	1.53844	0.504912
ACVR1	YML060W	0.808667	0.50067
ACVR1	YER171W	1.5807	0.499929
ACVR1	YJR011C	0.979135	0.499713
ACVR1	YBR205W	2.42037	0.499281
ACVR1	YIL111W	1.35107	0.497371
ACVR1	YNL065W	3.33188	0.497327
ACVR1	YMR007W	2.70777	0.496579
ACVR1	YOR002W	1.5638	0.494527
ACVR1	YJL154C	0.839661	0.492719
ACVR1	YAR042W	1.26935	0.491297
ACVR1	YBR072W	2.1062	0.491173
ACVR1	YAL031C	0.919964	0.490239
ACVR1	YEL030W	1.34543	0.489037
ACVR1	YAL058W	0.950959	0.48841
ACVR1	YHR179W	0.824164	0.486645
ACVR1	YJL150W	1.73568	0.486348
ACVR1	YBR228W	2.29075	0.484084
ACVR1	YPL141C	2.10761	0.483565
ACVR1	YJR031C	2.22313	0.482437
ACVR1	YNL269W	1.86106	0.479656
ACVR1	YOR291W	1.36093	0.475515
ACVR1	YOR017W	1.59338	0.474634
ACVR1	YNL230C	0.715684	0.474071
ACVR1	YDR248C	0.919964	0.472034
ACVR1	YOR047C	1.83007	0.4716
ACVR1	YMR107W	1.08761	0.471188
ACVR1	YDL118W	1.48209	0.469938
ACVR1	YOR094W	1.52153	0.46684
ACVR1	YER081W	1.42714	0.464685
ACVR1	YHR155W	2.58379	0.464395
ACVR1	YHL013C	0.777673	0.464166
ACVR1	YBL067C	1.52435	0.463594
ACVR1	YDL021W	0.707232	0.461981
ACVR1	YMR247C	1.82302	0.461414
ACVR1	YIL067C	0.835435	0.461146
ACVR1	YER048C	0.996041	0.460504
ACVR1	YOR213C	0.566349	0.460468
ACVR1	YNL205C	0.602978	0.456351
ACVR1	YER186C	0.893197	0.455272
ACVR1	YHL014C	2.93177	0.453814
ACVR1	YDL237W	1.8836	0.453539
ACVR1	YML048W	0.998859	0.449387
ACVR1	YIL090W	1.10029	0.448415
ACVR1	YMR155W	2.99939	0.447963
ACVR1	YML089C	2.5373	0.446417
ACVR1	YIL112W	0.624111	0.445055
ACVR1	YJR004C	3.15437	0.44474
ACVR1	YDR078C	0.965047	0.44315
ACVR1	YMR003W	0.798805	0.437117
ACVR1	YBR071W	2.0104	0.435415
ACVR1	YOR309C	0.0394472	0.432036
ACVR1	YEL040W	1.86388	0.431114
ACVR1	YHR136C	1.01576	0.429966
ACVR1	YDR072C	0.831208	0.424749
ACVR1	YOR027W	1.13974	0.423266
ACVR1	YJL152W	1.42151	0.421375
ACVR1	YHR018C	1.83852	0.421362
ACVR1	YML009c	3.23608	0.418882
ACVR1	YDR322W	0.281766	0.418037
ACVR1	YIL095W	1.21441	0.417057
ACVR1	YER175C	1.30457	0.417018
ACVR1	YDL018C	1.02985	0.415819
ACVR1	YHL039W	1.89769	0.414311
ACVR1	YML020W	1.21159	0.410833
ACVR1	YBR233W	1.16228	0.410591
ACVR1	YBR227C	1.85824	0.408983
ACVR1	YDR169C	1.36375	0.408346
ACVR1	YPL036W	4.00811	0.405815
ACVR1	YLR001C	2.9839	0.405611
ACVR1	YMR104C	3.09379	0.404781
ACVR1	YBR180W	0.663558	0.403584
ACVR1	YML116W	2.65141	0.401729
ACVR1	YDR154C	0.543807	0.401693
ACVR1	YMR034C	2.18509	0.398276
ACVR1	YDL157C	3.97994	0.396511
ACVR1	YLR041W	1.91319	0.396183
ACVR1	YIL002C	0.996041	0.396108
ACVR1	YHR001W-A	1.18482	0.396098
ACVR1	YMR299C	1.05099	0.395963
ACVR1	YHR171W	1.40883	0.395085
ACVR1	YDL078C	1.15383	0.39423
ACVR1	YDL231C	3.68831	0.391814
ACVR1	YHR017W	0.880517	0.390578
ACVR1	YDL197C	1.55816	0.389886
ACVR1	YMR241W	1.55394	0.389001
ACVR1	YOR219C	1.27076	0.387719
ACVR1	YEL012W	1.94841	0.387359
ACVR1	YHR157W	0.693143	0.387076
ACVR1	YOL029C	0.714276	0.382014
ACVR1	YNL115C	1.29753	0.381814
ACVR1	YER101C	0.494499	0.381112
ACVR1	YHL023C	1.49477	0.379837
ACVR1	YML005W	0.650878	0.378387
ACVR1	YOL019W	1.06085	0.37514
ACVR1	YER088C	1.00168	0.374927
ACVR1	YNL274C	5.5691	0.373117
ACVR1	YJL053W	1.3412	0.371769
ACVR1	YIL102C	0.967865	0.370994
ACVR1	YOR328W	3.5277	0.370667
ACVR1	YML078W	2.5542	0.369478
ACVR1	YJR109C	4.45612	0.367904
ACVR1	YOL014W	2.02026	0.367316
ACVR1	YOL060C	0.780491	0.366922
ACVR1	YML084W	2.46122	0.365539
ACVR1	YBL094C	0.943915	0.364089
ACVR1	YNL196C	0.484637	0.363852
ACVR1	YBR053C	1.55957	0.363328
ACVR1	YNL325C	0.714276	0.362593
ACVR1	YMR111C	1.49336	0.362193
ACVR1	YML028W	0.605796	0.357701
ACVR1	YHR049C-A	1.19328	0.357414
ACVR1	YBR100W	0.790352	0.356877
ACVR1	YIL159W	1.68918	0.353195
ACVR1	YIL065C	1.23695	0.351998
ACVR1	YBR016W	2.29075	0.351053
ACVR1	YOR022C	2.65423	0.34982
ACVR1	YJL124C	1.0214	0.349587
ACVR1	YOR085W	0.755132	0.34844
ACVR1	YNL314W	1.18201	0.347798
ACVR1	YHR143W	0.874882	0.347124
ACVR1	YNL105W	2.35556	0.346601
ACVR1	YDR277C	0.352207	0.346019
ACVR1	YNL054W	0.85375	0.34463
ACVR1	YBL056W	0.849523	0.343683
ACVR1	YNL125C	2.53589	0.342682
ACVR1	YHR051W	0.405742	0.34094
ACVR1	YPL250C	1.73427	0.338996
ACVR1	YPL039W	1.08761	0.33864
ACVR1	YDR249C	0.815711	0.338445
ACVR1	YML031W	3.95035	0.33804
ACVR1	YMR265C	3.40091	0.336331
ACVR1	YHR135C	0.676237	0.335808
ACVR1	YDR146C	2.04984	0.335537
ACVR1	YML101C	3.04729	0.333821
ACVR1	YDR018C	2.68523	0.331523
ACVR1	YAL034C	1.16651	0.331031
ACVR1	YOR222W	1.07071	0.330758
ACVR1	YOR368W	0.962229	0.330253
ACVR1	YBR178W	0.815711	0.330059
ACVR1	YMR285C	2.59929	0.32885
ACVR1	YLL013C	1.12565	0.328709
ACVR1	YBR197C	0.948141	0.326087
ACVR1	YAR037W	1.21441	0.324412
ACVR1	YOR325W	7.29914	0.322301
ACVR1	YJR020W	2.20763	0.322226
ACVR1	YPL192C	1.82725	0.322032
ACVR1	YHL030W	1.27217	0.319177
ACVR1	YOR059C	4.95907	0.31655
ACVR1	YER129W	1.04676	0.313629
ACVR1	YDR217C	0.55226	0.3133
ACVR1	YMR238W	1.74976	0.311541
ACVR1	YBL045C	1.31585	0.311291
ACVR1	YEL053C	1.4849	0.311249
ACVR1	YPL207W	1.00027	0.310388
ACVR1	YJL110C	2.3133	0.308519
ACVR1	YNL052W	2.52603	0.307428
ACVR1	YNL074C	3.58828	0.306408
ACVR1	YER118C	0.74527	0.306291
ACVR1	YER019C-A	1.692	0.305589
ACVR1	YNL143C	3.01066	0.304099
ACVR1	YDL215C	3.5911	0.301427
ACVR1	YBR075W	1.47927	0.300716
ACVR1	YPL167C	1.85543	0.300143
ACVR1	YBL062W	0.970682	0.299624
ACVR1	YIL016W	0.676237	0.298287
ACVR1	YPL114W	2.10056	0.297146
ACVR1	YPL135W	1.81598	0.295464
ACVR1	YML019W	1.44405	0.293099
ACVR1	YBL012C	1.11861	0.291833
ACVR1	YLR123C	2.10761	0.291754
ACVR1	YDL172C	1.02422	0.291494
ACVR1	YDL219W	2.52039	0.290685
ACVR1	YCL056C	0.891788	0.290614
ACVR1	YMR031C	1.05803	0.289884
ACVR1	YHR006W	3.35301	0.289499
ACVR1	YIL108W	2.54153	0.289385
ACVR1	YJR099W	2.69931	0.288335
ACVR1	YNL322C	1.45814	0.286798
ACVR1	YLL005C	1.75117	0.285353
ACVR1	YPL120W	1.90896	0.284301
ACVR1	YOR162C	0.415604	0.283265
ACVR1	YJL073W	2.46545	0.281564
ACVR1	YIL010W	4.92526	0.281026
ACVR1	YOR172W	0.90165	0.280465
ACVR1	YER064C	2.1865	0.280321
ACVR1	YHR146W	1.42292	0.27812
ACVR1	YPL200W	1.37642	0.2778
ACVR1	YIL041W	0.650878	0.276022
ACVR1	YMR172C-A	1.46659	0.27528
ACVR1	YLR003C	1.31444	0.274358
ACVR1	YMR316C-B	1.63988	0.269948
ACVR1	YDL095W	0.473366	0.269322
ACVR1	YER139C	0.459278	0.268754
ACVR1	YDL241W	1.6117	0.268511
ACVR1	YJL051W	5.03515	0.266093
ACVR1	YPL246C	1.0369	0.265241
ACVR1	YPL249C	1.00309	0.265024
ACVR1	YER130C	0.46914	0.264799
ACVR1	YMR110C	1.70891	0.264215
ACVR1	YML055W	1.00731	0.263632
ACVR1	YPR003C	0.526902	0.26221
ACVR1	YNL324W	0.473366	0.261439
ACVR1	YMR105C	0.836844	0.261369
ACVR1	YIR004W	0.591708	0.260767
ACVR1	YJL122W	2.87683	0.260045
ACVR1	YAL004W	1.13692	0.259981
ACVR1	YBR250W	2.17664	0.258642
ACVR1	YIL007C	2.28371	0.258528
ACVR1	YEL001C	1.47082	0.257789
ACVR1	YPL109C	0.700187	0.257034
ACVR1	YCL022C	1.94559	0.256669
ACVR1	YHR151C	0.633972	0.256191
ACVR1	YCL038C	2.74581	0.255288
ACVR1	YER089C	1.2764	0.253529
ACVR1	YJL142C	1.88501	0.253107
ACVR1	YDR043C	1.87515	0.252792
ACVR1	YNL106C	1.70468	0.251546
ACVR1	YHR137W	1.00168	0.251366
ACVR1	YNL173C	0.94955	0.249254
ACVR1	YOR277C	0.457869	0.248636
ACVR1	YLL059C	1.49758	0.246572
ACVR1	YBL075C	1.34402	0.246127
ACVR1	YJL171C	1.92869	0.24539
ACVR1	YMR252C	1.71877	0.242167
ACVR1	YML087C	2.5218	0.242055
ACVR1	YLR150W	0.705823	0.241219
ACVR1	YAL065C	1.07634	0.241095
ACVR1	YLR227C	0.657923	0.241069
ACVR1	YOR288C	1.98926	0.241066
ACVR1	YJL068C	3.25017	0.239595
ACVR1	YJR103W	1.00309	0.239339
ACVR1	YOR066W	0.587481	0.238318
ACVR1	YOR323C	0.549443	0.2375
ACVR1	YNL116W	1.46095	0.237387
ACVR1	YBR037C	0.52831	0.237248
ACVR1	YJL199C	0.687508	0.236013
ACVR1	YCL026C	0.924191	0.235352
ACVR1	YMR132C	1.06366	0.234836
ACVR1	YER158C	1.3722	0.233128
ACVR1	YPL054W	0.563531	0.232625
ACVR1	YHR047C	1.05521	0.232408
ACVR1	YOR064C	1.4046	0.231832
ACVR1	YBR005W	1.34825	0.231188
ACVR1	YER038W-A	1.25527	0.230682
ACVR1	YLR219W	0.76922	0.229868
ACVR1	YIL120W	5.87763	0.228939
ACVR1	YMR210W	3.16845	0.228895
ACVR1	YDL230W	3.13887	0.227556
ACVR1	YAL049C	0.519857	0.227233
ACVR1	YBR148W	2.1541	0.227045
ACVR1	YBR162W-A	1.07353	0.226882
ACVR1	YJL213W	1.73145	0.226667
ACVR1	YOL030W	1.72581	0.226339
ACVR1	YMR018W	1.34402	0.226044
ACVR1	YJR060W	0.331075	0.224953
ACVR1	YJR037W	3.31215	0.224879
ACVR1	YEL013W	1.33134	0.224622
ACVR1	YML109W	2.32738	0.224545
ACVR1	YJR097W	2.15832	0.223609
ACVR1	YJL145W	0.993224	0.223483
ACVR1	YMR167W	1.27781	0.221789
ACVR1	YIL006W	2.41896	0.220524
ACVR1	YER113C	0.70864	0.21776
ACVR1	YBL011W	1.23272	0.21565
ACVR1	YBR262C	2.04844	0.215309
ACVR1	YJL193W	0.838252	0.21318
ACVR1	YPL004C	0.826982	0.212671
ACVR1	YLR205C	0.535355	0.212452
ACVR1	YDL121C	1.98645	0.21219
ACVR1	YEL011W	2.19073	0.210851
ACVR1	YDR206W	0.824164	0.210288
ACVR1	YOL068C	0.549443	0.209908
ACVR1	YPL065W	0.874882	0.20934
ACVR1	YJR008W	1.14819	0.209241
ACVR1	YDR075W	0.655105	0.209218
ACVR1	YHR057C	0.966456	0.208864
ACVR1	YOR030W	1.76667	0.207639
ACVR1	YJL066C	1.82584	0.206634
ACVR1	YIL023C	0.752314	0.206384
ACVR1	YJR117W	5.03092	0.205877
ACVR1	YBR240C	1.95827	0.205286
ACVR1	YDR183W	0.67342	0.202407
ACVR1	YMR177W	2.34852	0.201351
ACVR1	YMR311C	2.53589	0.200895
ACVR1	YDL171C	4.67872	0.200445
ACVR1	YLR142W	1.33134	0.197749
ACVR1	YMR306C-A	1.66242	0.197294
ACVR1	YMR019W	1.70327	0.196745
ACVR1	YJL218W	1.44405	0.193534
ACVR1	YOR040W	2.19214	0.193225
ACVR1	YDL167C	4.99429	0.192432
ACVR1	YDR150W	0.166242	0.191242
ACVR1	YER115C	1.32148	0.19025
ACVR1	YOR347C	2.1386	0.190096
ACVR1	YHR076W	0.781899	0.188434
ACVR1	YNL204C	0.584664	0.18776
ACVR1	YOR034C	1.00168	0.187678
ACVR1	YBR129C	0.762176	0.186839
ACVR1	YJR048W	1.48209	0.186708
ACVR1	YHR095W	1.24963	0.186498
ACVR1	YJL118W	3.44036	0.186437
ACVR1	YDR297W	1.96813	0.185445
ACVR1	YLR128W	0.652287	0.185358
ACVR1	YPL272C	0.824164	0.184894
ACVR1	YBR216C	1.61593	0.184154
ACVR1	YOR342C	2.05407	0.183384
ACVR1	YER042W	1.1496	0.182966
ACVR1	YLL019C	0.869247	0.182086
ACVR1	YDL079C	1.14115	0.181715
ACVR1	YLR099C	1.1172	0.180506
ACVR1	YER123W	0.838252	0.180274
ACVR1	YPL196W	1.73849	0.177998
ACVR1	YBR147W	2.55984	0.176387
ACVR1	YPL121C	1.47504	0.175057
ACVR1	YBR064W	2.49644	0.174726
ACVR1	YLR034C	1.7554	0.174218
ACVR1	YLR171W	0.967865	0.173982
ACVR1	YBR248C	1.57789	0.173693
ACVR1	YJR127C	2.30343	0.173042
ACVR1	YIL050W	1.95545	0.172411
ACVR1	YPL144W	0.402925	0.172228
ACVR1	YHR049W	1.12143	0.171886
ACVR1	YML037C	1.65396	0.171651
ACVR1	YEL006W	0.559305	0.169879
ACVR1	YML059C	1.9315	0.169556
ACVR1	YIL170W	3.46149	0.169345
ACVR1	YER058W	0.536763	0.167833
ACVR1	YDR210W	1.67932	0.167802
ACVR1	YOR015W	2.46263	0.167452
ACVR1	YER114C	0.646652	0.167429
ACVR1	YMR127C	1.22427	0.16728
ACVR1	YJL108C	1.75963	0.16654
ACVR1	YBL102W	1.8033	0.165418
ACVR1	YIL087C	2.45418	0.165156
ACVR1	YML104C	2.41473	0.164845
ACVR1	YBL015W	1.25245	0.164763
ACVR1	YNL255C	2.36401	0.164474
ACVR1	YJL078C	2.06675	0.163727
ACVR1	YER172C	1.56662	0.162507
ACVR1	YDL025C	0.32403	0.162249
ACVR1	YMR102C	1.75822	0.161025
ACVR1	YBR018C	2.25553	0.159471
ACVR1	YMR006C	2.19354	0.159158
ACVR1	YBR105C	1.03971	0.158374
ACVR1	YBL089W	1.01295	0.156547
ACVR1	YMR196W	1.56662	0.153563
ACVR1	YDR293C	0.145109	0.15252
ACVR1	YNL224C	0.524084	0.15193
ACVR1	YLL014W	0.752314	0.151835
ACVR1	YDR223W	1.37361	0.149906
ACVR1	YBL036C	0.976318	0.149478
ACVR1	YLR055C	0.259224	0.149289
ACVR1	YNL179C	0.539581	0.148071
ACVR1	YMR214W	0.431101	0.147883
ACVR1	YBR230C	3.01207	0.14746
ACVR1	YBR231C	0.722729	0.142832
ACVR1	YLL048C	1.82302	0.14215
ACVR1	YJR043C	0.181739	0.14211
ACVR1	YBR134W	0.267677	0.141297
ACVR1	YNL093W	1.11016	0.140302
ACVR1	YBR120C	1.57789	0.138996
ACVR1	YJR111C	0.448007	0.138765
ACVR1	YMR245W	0.725546	0.138576
ACVR1	YPL181W	0.663558	0.138436
ACVR1	YOR058C	1.45814	0.135731
ACVR1	YJR149W	1.15101	0.135361
ACVR1	YAL007C	0.826982	0.134805
ACVR1	YCL069W	0.980544	0.134488
ACVR1	YPL177C	1.70891	0.134427
ACVR1	YNL177C	0.0690326	0.132887
ACVR1	YAL037W	0.857976	0.131969
ACVR1	YMR126C	0.862203	0.131111
ACVR1	YML079W	2.99658	0.131033
ACVR1	YBR244W	5.76774	0.130916
ACVR1	YDR131C	1.23977	0.129456
ACVR1	YNL271C	0.257815	0.128089
ACVR1	YBL054W	0.378975	0.12799
ACVR1	YPL166W	2.07098	0.127649
ACVR1	YER067W	1.36797	0.127204
ACVR1	YOR276W	0.376157	0.126894
ACVR1	YMR204C	1.60465	0.126823
ACVR1	YOR005C	2.67114	0.126417
ACVR1	YOR011W	2.78948	0.124184
ACVR1	YIL110W	0.211324	0.123992
ACVR1	YNL070W	0.635381	0.122897
ACVR1	YER187W	0.918556	0.122425
ACVR1	YHR043C	1.07071	0.121832
ACVR1	YDL068W	0.280357	0.12167
ACVR1	YDR306C	0.378975	0.120292
ACVR1	YER146W	0.76922	0.119718
ACVR1	YNL101W	2.05548	0.119671
ACVR1	YEL016C	1.36797	0.119049
ACVR1	YLR040C	1.23554	0.116578
ACVR1	YDR256C	1.02844	0.115738
ACVR1	YLR015W	0.979135	0.115256
ACVR1	YPL186C	0.605796	0.114564
ACVR1	YDR218C	0.695961	0.112814
ACVR1	YNL157W	0.595934	0.112511
ACVR1	YLR118C	1.81598	0.112209
ACVR1	YML107C	1.90333	0.111914
ACVR1	YBR222C	1.0369	0.111487
ACVR1	YOL061W	1.40601	0.110318
ACVR1	YDL112W	2.2344	0.107504
ACVR1	YAL055W	1.07775	0.106988
ACVR1	YDR263C	1.21582	0.106816
ACVR1	YJR021C	0.898832	0.106579
ACVR1	YOR297C	3.67422	0.10621
ACVR1	YBR175W	0.270495	0.105703
ACVR1	YHR177W	1.213	0.104197
ACVR1	YDR009W	3.37414	0.104189
ACVR1	YPL067C	1.31021	0.104173
ACVR1	YOR045W	1.21582	0.103615
ACVR1	YJR003C	1.52153	0.1035
ACVR1	YAR023C	0.594525	0.101839
ACVR1	YCR019W	1.55112	0.101474
ACVR1	YJL065C	1.45391	0.101085
ACVR1	YCL075W	5.22675	0.100809
ACVR1	YJL030W	1.74272	0.0983081
ACVR1	YMR041C	1.61311	0.0974279
ACVR1	YHR003C	3.23608	0.096378
ACVR1	YDL218W	3.18959	0.0948755
ACVR1	YMR027W	1.31725	0.094502
ACVR1	YCL001W	0.632564	0.0931192
ACVR1	YOR381W	1.73286	0.0927897
ACVR1	YNL066W	3.25298	0.0924922
ACVR1	YLR181C	0.680464	0.0918582
ACVR1	YBR062C	1.26513	0.0911248
ACVR1	YHR016C	2.30625	0.0907662
ACVR1	YHL022C	0.826982	0.0892795
ACVR1	YOR377W	0.821347	0.0892698
ACVR1	YJR150C	2.99376	0.0891377
ACVR1	YHL010C	1.76808	0.0886444
ACVR1	YOR150W	0.509996	0.0876999
ACVR1	YOR084W	2.01462	0.0873669
ACVR1	YBR128C	1.08761	0.0873098
ACVR1	YOR132W	0.863611	0.0869935
ACVR1	YLR035C	0.993224	0.086845
ACVR1	YHR116W	0.483228	0.0865211
ACVR1	YNL327W	2.06816	0.0855976
ACVR1	YBR172C	1.28626	0.0849405
ACVR1	YDL133W	0.910103	0.0836567
ACVR1	YBL107C	2.09774	0.0826476
ACVR1	YBR024W	1.15101	0.0823958
ACVR1	YDR005C	0.849523	0.081917
ACVR1	YJL095W	0.776264	0.0808375
ACVR1	YJL120W	0.562122	0.0803979
ACVR1	YAL018C	0.931235	0.0803851
ACVR1	YLR044C	0.570575	0.0800629
ACVR1	YJL198W	0.691734	0.0791052
ACVR1	YJL100W	3.51643	0.0788572
ACVR1	YOR125C	1.64692	0.0784741
ACVR1	YIL161W	1.40319	0.0774017
ACVR1	YDR286C	0.608614	0.0770375
ACVR1	YMR025W	0.64947	0.0763657
ACVR1	YOR025W	1.39615	0.0762841
ACVR1	YOR081C	1.17355	0.0760635
ACVR1	YLR089C	0.688917	0.0746178
ACVR1	YNL175C	0.411378	0.0744716
ACVR1	YCL044C	0.495907	0.0742217
ACVR1	YCR020C	0.391654	0.0739248
ACVR1	YOR351C	1.01576	0.0733148
ACVR1	YCR010C	0.84107	0.0728579
ACVR1	YHR037W	1.06648	0.0718917
ACVR1	YOR028C	2.58661	0.0718086
ACVR1	YPL138C	1.25386	0.0695053
ACVR1	YIL070C	2.46545	0.0690633
ACVR1	YPL058C	0.598752	0.0687303
ACVR1	YJR054W	1.08339	0.0687173
ACVR1	YOR154W	0.764993	0.0682874
ACVR1	YJR134C	1.54548	0.067997
ACVR1	YOL064C	0.328257	0.067548
ACVR1	YDL026W	0.852341	0.066893
ACVR1	YML083C	1.37924	0.0666721
ACVR1	YIL094C	0.549443	0.0665886
ACVR1	YJR154W	1.22004	0.0656443
ACVR1	YER182W	0.798805	0.0655031
ACVR1	YDL127W	0.786126	0.0646886
ACVR1	YMR222C	1.62579	0.0643315
ACVR1	YAR047C	1.03549	0.0642261
ACVR1	YOR298W	3.00644	0.0633284
ACVR1	YBR185C	1.72159	0.0632586
ACVR1	YOR382W	2.01885	0.0630062
ACVR1	YLL012W	1.6751	0.062607
ACVR1	YDR110W	1.26935	0.0615617
ACVR1	YPL130W	1.18201	0.06099
ACVR1	YDR090C	1.76526	0.0608197
ACVR1	YHR121W	1.62579	0.0603898
ACVR1	YNL265C	0.763585	0.0598286
ACVR1	YJR049C	0.819938	0.0594528
ACVR1	YAL042W	0.821347	0.0589473
ACVR1	YDR014W	0.691734	0.0588281
ACVR1	YOR360C	0.184556	0.0585503
ACVR1	YOR099W	0.522675	0.0584296
ACVR1	YOR268C	1.07212	0.0574069
ACVR1	YDR233C	1.57084	0.0573079
ACVR1	YHR182W	0.994632	0.0572278
ACVR1	YJR095W	1.86529	0.0570397
ACVR1	YOR317W	2.24004	0.0566991
ACVR1	YLR188W	1.04676	0.0559425
ACVR1	YBR263W	1.723	0.0551337
ACVR1	YDL009C	0.776264	0.0548626
ACVR1	YDR139C	1.29753	0.0547444
ACVR1	YDR022C	3.37132	0.0530567
ACVR1	YMR176W	2.82188	0.0526312
ACVR1	YJL048C	3.15014	0.0520937
ACVR1	YML007W	1.06789	0.0519102
ACVR1	YAL059W	0.315577	0.0516711
ACVR1	YPL185W	1.4356	0.0508756
ACVR1	YBL044W	0.414195	0.0507929
ACVR1	YER148W-A	0.139474	0.0499566
ACVR1	YBL106C	0.515631	0.0495708
ACVR1	YOR264W	1.12706	0.0495164
ACVR1	YJL168C	0.260633	0.049158
ACVR1	YBR068C	1.60184	0.0485686
ACVR1	YIL057C	0.419831	0.0485635
ACVR1	YEL048C	1.95545	0.0476086
ACVR1	YJL004C	0.805849	0.0475696
ACVR1	YAL068C	1.87938	0.0469218
ACVR1	YJR039W	1.01295	0.046856
ACVR1	YML062C	0.618475	0.0465179
ACVR1	YNL236W	0.18033	0.0447737
ACVR1	YEL056W	1.35952	0.0434334
ACVR1	YBL083C	0.364886	0.0433348
ACVR1	YEL066W	1.50463	0.0431267
ACVR1	YLR201C	0.531128	0.0426577
ACVR1	YER001W	1.86388	0.0424823
ACVR1	YNL129W	2.73594	0.042347
ACVR1	YPL051W	0.869247	0.0388437
ACVR1	YOL083W	0.566349	0.0369004
ACVR1	YER046W	3.2558	0.0367308
ACVR1	YDR239C	1.32852	0.0357198
ACVR1	YJL197W	0.904467	0.03536
ACVR1	YBL098W	1.61452	0.0352283
ACVR1	YLR177W	0.770629	0.0345262
ACVR1	YOR108W	0.52831	0.0345056
ACVR1	YBR084W	1.59338	0.0343435
ACVR1	YML022W	1.38488	0.0334684
ACVR1	YMR122C	0.683281	0.0324518
ACVR1	YJL017W	1.3398	0.0319518
ACVR1	YDL104C	1.72722	0.0316273
ACVR1	YMR004W	0.822755	0.0313082
ACVR1	YPL100W	1.48913	0.0308095
ACVR1	YER046W-A	0.532537	0.0306549
ACVR1	YDR252W	0.852341	0.0305474
ACVR1	YLR011W	2.02871	0.0293386
ACVR1	YML081W	1.94418	0.0289581
ACVR1	YLL058W	3.69536	0.0280508
ACVR1	YOR252W	0.402925	0.0279997
ACVR1	YHR114W	1.60747	0.0276044
ACVR1	YCL037C	0.277539	0.026529
ACVR1	YPL265W	0.0521266	0.0251002
ACVR1	YAL012W	3.19804	0.0249918
ACVR1	YOR274W	0.424057	0.0248651
ACVR1	YJL057C	1.69623	0.0243036
ACVR1	YER045C	1.44405	0.0229531
ACVR1	YLR209C	1.65819	0.0229317
ACVR1	YJR035W	1.91601	0.020802
ACVR1	YDL011C	0.55226	0.0207807
ACVR1	YNL168C	0.988997	0.0200512
ACVR1	YJL060W	3.21917	0.0199518
ACVR1	YOR106W	0.22823	0.0193993
ACVR1	YLR154C	0.538172	0.0192367
ACVR1	YLR192C	2.60351	0.0190616
ACVR1	YJL012C	0.704414	0.0189335
ACVR1	YDR094W	1.41165	0.0183271
ACVR1	YOR053W	1.468	0.0179616
ACVR1	YJL089W	1.9949	0.0167899
ACVR1	YDR307W	0.56494	0.0165028
ACVR1	YJR148W	2.47531	0.0147947
ACVR1	YBR169C	1.65115	0.0146495
ACVR1	YJR056C	1.30317	0.0135311
ACVR1	YJR108W	1.08057	0.0131657
ACVR1	YHR153C	0.711458	0.0128583
ACVR1	YIL036W	0.680464	0.0119758
ACVR1	YAL029C	0.883335	0.0116873
ACVR1	YDL099W	0.51704	0.0104858
ACVR1	YOL007C	0.388836	0.0101432
ACVR1	YMR246W	1.40601	0.0100063
ACVR1	YLR073C	1.12002	0.00989855
ACVR1	YOR327C	2.19354	0.00944297
ACVR1	YDL109C	2.40346	0.0093047
ACVR1	YMR035W	0.690326	0.00911528
ACVR1	YOR378W	1.24681	0.00874743
ACVR1	YOR126C	2.48235	0.00870495
ACVR1	YNL108C	1.35247	0.00801791
ACVR1	YDR049W	0.322622	0.00691988
ACVR1	YJL043W	2.71904	0.00526277
ACVR1	YAR014C	0.322622	0.00343341
ACVR1	YMR209C	1.22145	0.00247692
ACVR1	YHR209W	1.12284	0.00163377
ACVR1	YMR129W	1.49054	0.00148979
ACVR1	YPL184C	1.51308	0.00134402
ACVR1	YPL009C	1.22004	0.00123253
ACVR1	YLR203C	0.524084	0.000983937
ACVR1	YML058W	0.869247	0.00057019
AGK	YHR130C	5.2998	4.06929
AGK	YHR204W	3.38058	4.06305
AGK	YOL056W	4.76041	4.00871
AGK	YDL234C	7.98419	3.89828
AGK	YDR279W	1.11014	3.73641
AGK	YOR339C	5.72629	3.68747
AGK	YLL017W	3.94506	3.66963
AGK	YMR204C	5.06774	3.60615
AGK	YOR024W	6.02735	3.5728
AGK	YBR232C	5.57577	3.54723
AGK	YPL225W	2.19518	3.49512
AGK	YMR273C	4.44054	3.47856
AGK	YDR256C	3.31159	3.47193
AGK	YNL200C	5.90818	3.45569
AGK	YLR077W	6.54792	3.39323
AGK	YNL264C	2.45861	3.39211
AGK	YOL067C	2.52132	3.38092
AGK	YPL222W	2.60286	3.32759
AGK	YOR111W	4.66006	3.29597
AGK	YHR093W	3.69418	3.28734
AGK	YOL016C	5.95208	3.25034
AGK	YNL211C	1.61189	3.17571
AGK	YDL168W	8.75564	3.16942
AGK	YIL131C	4.79804	3.14985
AGK	YML107C	5.24335	3.09678
AGK	YJL005W	1.12268	3.06453
AGK	YBR103W	1.57426	3.06282
AGK	YMR048W	3.30532	3.0522
AGK	YMR132C	2.78475	3.04657
AGK	YMR178W	3.86979	3.01834
AGK	YMR225C	4.72905	3.00642
AGK	YDR282C	1.1415	3.00176
AGK	YLL059C	3.97015	2.95219
AGK	YNL318C	5.27471	2.95029
AGK	YEL023C	2.70948	2.94757
AGK	YDL078C	2.94782	2.94292
AGK	YBR094W	2.08229	2.91585
AGK	YBR007C	4.79804	2.89549
AGK	YLL061W	7.65178	2.88419
AGK	YBL088C	2.87883	2.88035
AGK	YNL321W	8.14727	2.8772
AGK	YNL145W	9.83442	2.83385
AGK	YOR298W	7.56397	2.82416
AGK	YLL024C	3.84471	2.81832
AGK	YMR174c	3.14852	2.81065
AGK	YNL327W	6.26568	2.79099
AGK	YDR109C	3.31786	2.77882
AGK	YCL049C	4.66006	2.77358
AGK	YIL125W	1.98194	2.76406
AGK	YML101C	5.93954	2.75582
AGK	YJR103W	2.50251	2.7137
AGK	YDL059C	0.457852	2.70792
AGK	YLR211C	2.62795	2.69991
AGK	YML111W	5.33116	2.67636
AGK	YBR177C	2.51505	2.65125
AGK	YBL090W	1.05369	2.63079
AGK	YBR072W	4.07677	2.63012
AGK	YDR225W	1.45509	2.60918
AGK	YBR248C	4.09558	2.55873
AGK	YNL235C	2.25163	2.55188
AGK	YDR121W	1.68088	2.54818
AGK	YBL044W	1.56799	2.54277
AGK	YDR077W	2.96036	2.53402
AGK	YER177W	2.76593	2.5227
AGK	YDR191W	3.85098	2.52147
AGK	YBL064C	2.97291	2.51868
AGK	YHL007C	0.777722	2.48452
AGK	YER032W	1.74987	2.48402
AGK	YNL231C	3.21124	2.4835
AGK	YHR018C	3.88234	2.47445
AGK	YAL011W	1.13522	2.47142
AGK	YAL068C	3.73808	2.44998
AGK	YOL085C	5.28726	2.44102
AGK	YJR153W	7.72077	2.43146
AGK	YDR056C	4.49699	2.43024
AGK	YMR237W	1.05369	2.42007
AGK	YBR012C	4.67888	2.41644
AGK	YBR104W	3.44957	2.4094
AGK	YDL177C	12.8512	2.4071
AGK	YDR313C	1.5429	2.36892
AGK	YPL116W	3.22378	2.36712
AGK	YEL025C	3.04817	2.3566
AGK	YBR116C	1.63071	2.34764
AGK	YHR104W	1.56799	2.34162
AGK	YCL037C	0.928249	2.33476
AGK	YML003W	2.23281	2.31269
AGK	YPL107W	4.32765	2.31119
AGK	YDR018C	4.86703	2.3051
AGK	YOR375C	2.69067	2.30318
AGK	YML129C	2.17637	2.29108
AGK	YHR163W	1.51781	2.28815
AGK	YNL336W	6.00853	2.25843
AGK	YHR142W	0.978424	2.23147
AGK	YDL223C	3.85098	2.2271
AGK	YMR025W	1.73733	2.22597
AGK	YOR354C	3.33668	2.22522
AGK	YLL055W	3.70045	2.22265
AGK	YMR186W	2.74084	2.20817
AGK	YMR221C	3.3994	2.20724
AGK	YNL316C	4.49072	2.19215
AGK	YBR214W	1.78123	2.19095
AGK	YBR264C	3.0858	2.19035
AGK	YNL125C	4.80432	2.19012
AGK	YIL029C	1.91295	2.18159
AGK	YDL171C	8.05946	2.17892
AGK	YER174C	2.96036	2.17629
AGK	YOR343C	5.60085	2.17427
AGK	YBR131W	1.13522	2.17388
AGK	YOL007C	0.884345	2.16804
AGK	YDL186W	9.35148	2.16446
AGK	YNL325C	1.499	2.15237
AGK	YHR156C	1.66834	2.13602
AGK	YNL127W	2.89137	2.13433
AGK	YLR183C	1.73733	2.12731
AGK	YHL030W	2.67812	2.1272
AGK	YDL199C	4.91094	2.10618
AGK	YDR019C	7.23156	2.10324
AGK	YPL053C	1.04114	2.09865
AGK	YHL003C	11.5153	2.09472
AGK	YHR127W	6.5291	2.0928
AGK	YNL077W	1.56799	2.05914
AGK	YBR184W	1.50527	2.0583
AGK	YOR112W	1.69343	2.05788
AGK	YMR140W	5.95208	2.04885
AGK	YJL098W	6.07752	2.03571
AGK	YJR056C	3.06071	2.03544
AGK	YPL067C	2.84119	2.03495
AGK	YPL212C	2.51505	2.03268
AGK	YPL256C	3.53111	2.02041
AGK	YML131W	3.17988	2.01679
AGK	YIL160C	2.82238	2.00196
AGK	YLR017W	5.04265	1.9994
AGK	YOR005C	5.36879	1.98513
AGK	YDR162C	1.88159	1.98424
AGK	YOR288C	3.81962	1.98224
AGK	YPL112C	1.90667	1.97219
AGK	YOR120W	0.733818	1.96458
AGK	YPL214C	1.26693	1.96285
AGK	YJR024C	2.35825	1.95882
AGK	YNL285W	1.6997	1.95562
AGK	YMR133W	4.72905	1.95542
AGK	YNL115C	2.74084	1.94557
AGK	YMR105C	1.76869	1.94486
AGK	YNL095C	4.35901	1.94454
AGK	YAL022C	2.09483	1.94453
AGK	YOL028C	2.40843	1.94323
AGK	YNL333W	2.98545	1.94088
AGK	YPL049C	0.501756	1.94
AGK	YHR037W	2.214	1.92822
AGK	YEL004W	3.03562	1.92737
AGK	YMR317W	4.69142	1.91097
AGK	YIL059C	5.60712	1.91049
AGK	YMR144W	3.33668	1.90621
AGK	YBR120C	3.26141	1.9044
AGK	YJL070C	5.31234	1.89224
AGK	YPL260W	1.0725	1.88757
AGK	YMR315W	5.03638	1.87727
AGK	YHR199C	1.80632	1.87579
AGK	YNL063W	7.53261	1.86723
AGK	YHL038C	1.64952	1.8653
AGK	YJL103C	2.79729	1.86006
AGK	YOR327C	4.22102	1.85678
AGK	YHL039W	3.01681	1.8557
AGK	YIR016W	7.68941	1.85554
AGK	YBR207W	2.80983	1.84433
AGK	YDL112W	4.05168	1.83712
AGK	YOR071C	3.2865	1.83371
AGK	YPL248C	2.06974	1.82622
AGK	YMR173W-A	2.65931	1.81632
AGK	YNL190W	2.60913	1.81424
AGK	YJL122W	4.50953	1.81173
AGK	YDR096W	2.81611	1.81037
AGK	YEL010W	3.71927	1.79959
AGK	YJR116W	6.30958	1.79703
AGK	YOR055W	3.34295	1.79108
AGK	YER020W	3.79453	1.78592
AGK	YOR031W	2.18264	1.77978
AGK	YIL035C	0.188159	1.77774
AGK	YBR077C	1.48645	1.76316
AGK	YOR053W	2.65304	1.76202
AGK	YIL168W	6.44757	1.75818
AGK	YBL011W	2.40843	1.75044
AGK	YDR319C	1.34847	1.74846
AGK	YJR107W	5.2998	1.74491
AGK	YMR316C-A	2.24536	1.74135
AGK	YBR053C	2.50878	1.73649
AGK	YCL044C	0.978424	1.73447
AGK	YDR117C	1.86904	1.73421
AGK	YMR166C	3.80707	1.73013
AGK	YHR039C	0.796538	1.71799
AGK	YBR150C	1.30457	1.71348
AGK	YJL047C	0.846713	1.71055
AGK	YBR241C	3.713	1.70681
AGK	YBR230C	4.96739	1.70145
AGK	YLL025W	0.0188159	1.69755
AGK	YHR047C	1.91295	1.69579
AGK	YJL182C	2.22654	1.69378
AGK	YHR113W	1.83141	1.69259
AGK	YLR213C	1.99448	1.69125
AGK	YPL267W	2.16382	1.68552
AGK	YER066C-A	0.294782	1.67611
AGK	YPL174C	0.915705	1.66573
AGK	YOL032W	1.92549	1.66288
AGK	YDL114W	3.79453	1.66098
AGK	YMR222C	4.23357	1.66051
AGK	YDR108W	2.38961	1.65967
AGK	YCR005C	2.23281	1.65842
AGK	YPL156C	2.11365	1.65728
AGK	YDL218W	5.87682	1.65401
AGK	YOR338W	2.24536	1.65032
AGK	YJR150C	5.52559	1.65025
AGK	YOR150W	1.22303	1.64887
AGK	YOR364W	0.658555	1.64524
AGK	YLR214W	1.03487	1.64267
AGK	YBL070C	3.2865	1.64099
AGK	YOL072W	0.903161	1.63908
AGK	YHR057C	1.84395	1.63479
AGK	YOR350C	0.721274	1.6259
AGK	YER044C-A	3.88234	1.62397
AGK	YNL057W	3.82589	1.61841
AGK	YPL257W	1.11014	1.61645
AGK	YIL117C	2.85374	1.6148
AGK	YER176W	1.87531	1.6132
AGK	YDL225W	2.89137	1.60803
AGK	YOR153W	3.62519	1.60705
AGK	YDL222C	8.24134	1.60484
AGK	YDL215C	5.55695	1.60226
AGK	YER060W	3.93879	1.59432
AGK	YLR049C	1.66207	1.59206
AGK	YJL079C	4.63497	1.58491
AGK	YMR103C	2.35198	1.5833
AGK	YCL012W	3.23633	1.58329
AGK	YDL243C	4.428	1.57653
AGK	YJL024C	1.29202	1.57604
AGK	YLR227C	1.44255	1.57344
AGK	YHR202W	2.03211	1.57301
AGK	YDL179W	4.60988	1.56141
AGK	YBL063W	2.0133	1.55838
AGK	YLR037C	2.92273	1.55658
AGK	YOR193W	2.08229	1.54821
AGK	YOR357C	3.713	1.54712
AGK	YCL006C	5.55695	1.54376
AGK	YOR300W	7.79604	1.54226
AGK	YMR316C-B	2.91019	1.54011
AGK	YOL037C	1.21676	1.53851
AGK	YOR100C	1.61816	1.5286
AGK	YIR002C	2.26417	1.52809
AGK	YDR197W	1.25439	1.5251
AGK	YOR342C	3.52484	1.52014
AGK	YER063W	3.48721	1.51862
AGK	YMR206W	3.45585	1.50814
AGK	YNL146W	3.91997	1.5061
AGK	YIL140W	3.75063	1.50513
AGK	YDR122W	3.94506	1.49845
AGK	YJR109C	6.24686	1.49716
AGK	YML019W	2.5715	1.4923
AGK	YOR345C	8.14727	1.48938
AGK	YMR271C	4.51581	1.48612
AGK	YIL120W	8.36678	1.48092
AGK	YER141W	1.94431	1.48061
AGK	YMR169c	2.14501	1.47957
AGK	YMR027W	2.36453	1.479
AGK	YER007C-A	1.99448	1.47371
AGK	YNL091W	1.21676	1.47055
AGK	YML007W	1.93176	1.46643
AGK	YJR115W	5.03011	1.46601
AGK	YOL046C	3.54992	1.46031
AGK	YCL026C	1.76242	1.44683
AGK	YOR321W	4.14576	1.44269
AGK	YDR014W	1.51154	1.44249
AGK	YML024W	0.457852	1.44072
AGK	YPL164C	1.81259	1.4402
AGK	YDR030C	5.03011	1.43857
AGK	YMR278W	3.9137	1.42453
AGK	YOR155C	6.44129	1.42434
AGK	YNL105W	3.43703	1.42122
AGK	YDR171W	3.81335	1.41746
AGK	YDR233C	2.929	1.40834
AGK	YDR042C	4.2273	1.40772
AGK	YPL259C	1.88159	1.40419
AGK	YNL108C	2.53387	1.404
AGK	YDL231C	5.06774	1.40188
AGK	YLR201C	1.1415	1.39486
AGK	YLL053C	4.39037	1.39372
AGK	YHR139C-A	2.46488	1.3888
AGK	YDL096C	1.40492	1.38879
AGK	YMR316W	3.1297	1.38304
AGK	YDL206W	4.84822	1.38273
AGK	YDL197C	2.30808	1.38264
AGK	YCL062W	1.99448	1.37597
AGK	YBR025C	0.909433	1.37382
AGK	YER056C	2.52132	1.37356
AGK	YDR046C	4.74787	1.36941
AGK	YOR366W	3.1297	1.36653
AGK	YIL108W	3.90115	1.35921
AGK	YOR222W	1.66834	1.35519
AGK	YMR255W	2.89764	1.35253
AGK	YNL159C	2.43352	1.34668
AGK	YOR171C	0.783994	1.3422
AGK	YPL216W	0.752634	1.34022
AGK	YLR193C	0.878073	1.31761
AGK	YOR091W	1.66207	1.31023
AGK	YLL048C	2.96036	1.30006
AGK	YLR018C	1.85023	1.29911
AGK	YOR154W	1.60562	1.29601
AGK	YDR152W	2.929	1.28844
AGK	YDL224C	4.28374	1.28783
AGK	YDR321W	1.13522	1.28732
AGK	YOR253W	2.01957	1.28723
AGK	YMR100W	1.62444	1.27788
AGK	YDR099W	2.24536	1.27518
AGK	YML052W	2.96663	1.27409
AGK	YJL036W	4.65379	1.27383
AGK	YMR109W	3.20497	1.27251
AGK	YPL227C	1.46764	1.26599
AGK	YLR030W	3.66909	1.26516
AGK	YNL202W	2.6844	1.26378
AGK	YPL103C	1.17285	1.26346
AGK	YPL246C	1.69343	1.25985
AGK	YDL067C	0.890617	1.25944
AGK	YDL203C	4.87331	1.25908
AGK	YML096W	2.32689	1.25637
AGK	YER172C	2.57777	1.25231
AGK	YPL170W	2.19518	1.24627
AGK	YJR082C	5.95208	1.2437
AGK	YML067C	0.451581	1.24209
AGK	YJL012C	1.32965	1.23286
AGK	YDR198C	1.23557	1.23078
AGK	YML022W	2.12619	1.22896
AGK	YLR210W	2.2579	1.2282
AGK	YMR155W	3.98896	1.2241
AGK	YBR240C	2.89137	1.22031
AGK	YER064C	3.23006	1.21603
AGK	YJR020W	3.26141	1.21191
AGK	YHR117W	1.24812	1.21113
AGK	YOR229W	1.37356	1.21085
AGK	YNL093W	1.77496	1.20885
AGK	YML103C	0.890617	1.2068
AGK	YOR093C	3.28023	1.20362
AGK	YIL006W	3.34922	1.20219
AGK	YLR206W	0.965881	1.20117
AGK	YDL038C	1.12895	1.19368
AGK	YCR020C-A	0.633467	1.1931
AGK	YJL110C	3.34922	1.19278
AGK	YAL053W	2.25163	1.18781
AGK	YJR094W-A	1.37356	1.18751
AGK	YHL047C	2.67185	1.18087
AGK	YNL194C	2.42097	1.17858
AGK	YOR062C	3.11716	1.17499
AGK	YJR021C	1.59935	1.17073
AGK	YOR030W	2.7283	1.16822
AGK	YER005W	1.63698	1.16528
AGK	YIL145C	2.99799	1.1648
AGK	YLR064W	2.05093	1.16314
AGK	YDR107C	2.73457	1.16103
AGK	YBR222C	1.67461	1.15928
AGK	YHR048W	0.31987	1.15521
AGK	YJL132W	3.91997	1.15361
AGK	YPL230W	2.03838	1.15325
AGK	YHR022C	1.93803	1.15127
AGK	YMR302C	2.214	1.15005
AGK	YJL038C	4.04541	1.14897
AGK	YJL042W	6.26568	1.14539
AGK	YDL174C	8.6992	1.14192
AGK	YJL068C	4.55971	1.13353
AGK	YER184C	1.76242	1.12721
AGK	YPL056C	1.33593	1.12605
AGK	YNL215W	0.376317	1.11687
AGK	YNL259C	2.49624	1.11426
AGK	YLL046C	5.32489	1.11414
AGK	YPL087W	1.72479	1.11114
AGK	YDL173W	1.42373	1.10994
AGK	YIR007W	4.82313	1.10947
AGK	YLR154C	1.01606	1.10784
AGK	YPL162C	1.499	1.10782
AGK	YOR280C	1.94431	1.10304
AGK	YDL210W	3.66909	1.10025
AGK	YMR306C-A	2.50878	1.09826
AGK	YMR153C-A	3.6001	1.09769
AGK	YOL066C	0.551932	1.09569
AGK	YHR146W	2.03211	1.09491
AGK	YDL136W	1.17285	1.09273
AGK	YJL037W	6.55419	1.09215
AGK	YHR086W	2.80983	1.08831
AGK	YOR084W	3.88234	1.0875
AGK	YDL189W	5.96463	1.08558
AGK	YDR314C	1.33593	1.08539
AGK	YIL056W	6.46638	1.0817
AGK	YLR093C	0.520572	1.0763
AGK	YDL034W	1.99448	1.07542
AGK	YDR010C	4.34019	1.07427
AGK	YJR066W	2.63422	1.07406
AGK	YLL012W	2.51505	1.0694
AGK	YMR120C	1.3422	1.06871
AGK	YBR141C	2.32062	1.06091
AGK	YOR086C	0.752634	1.06024
AGK	YPL105C	1.5868	1.05852
AGK	YAL039C	0.865529	1.05816
AGK	YEL006W	0.909433	1.05531
AGK	YBL055C	1.1854	1.05265
AGK	YJR078W	4.7416	1.05075
AGK	YMR029C	0.884345	1.04966
AGK	YHR184W	2.1011	1.04306
AGK	YLR192C	4.19594	1.04155
AGK	YDR084C	1.45509	1.04078
AGK	YBR161W	1.49272	1.03894
AGK	YDL182W	8.37933	1.03795
AGK	YHL044W	0.74009	1.03689
AGK	YBR074W	3.5562	1.03154
AGK	YOR273C	2.23909	1.03124
AGK	YOL019W	1.46764	1.02836
AGK	YPL264C	1.66834	1.02725
AGK	YLL026W	1.94431	1.0247
AGK	YJL105W	1.21049	1.02125
AGK	YBR179C	0.294782	1.02079
AGK	YER186C	1.12895	1.01756
AGK	YOR325W	9.26367	1.01656
AGK	YOR286W	1.49272	1.01555
AGK	YDR157W	1.45509	1.0123
AGK	YBR064W	3.36804	1.00784
AGK	YBR054W	1.87531	1.00542
AGK	YCR021C	2.14501	1.0031
AGK	YCR022C	1.12268	1.00106
AGK	YBR225W	1.58053	0.996816
AGK	YDR334W	0.301054	0.99377
AGK	YLR451W	0.815354	0.993747
AGK	YER078C	1.72479	0.987661
AGK	YAL046C	0.733818	0.984993
AGK	YHR177W	1.82514	0.984993
AGK	YDL240W	2.59659	0.982211
AGK	YDL184C	6.55419	0.979016
AGK	YOR114W	1.44255	0.977453
AGK	YAL014C	1.51154	0.977012
AGK	YEL040W	2.39589	0.975447
AGK	YDR015C	2.76593	0.974174
AGK	YNL191W	1.37356	0.971399
AGK	YMR115W	0.696187	0.971216
AGK	YAR020C	1.58053	0.95646
AGK	YJR095W	3.11716	0.953379
AGK	YDR209C	0.696187	0.952358
AGK	YDR133C	3.4433	0.952179
AGK	YPL229W	2.06974	0.951428
AGK	YLR220W	1.40492	0.951345
AGK	YBR227C	2.22654	0.947798
AGK	YDL093W	2.32689	0.941371
AGK	YHL028W	1.62444	0.937917
AGK	YJL043W	4.30256	0.935148
AGK	YDL188C	3.96387	0.929887
AGK	YDL170W	6.25941	0.929457
AGK	YDL239C	2.58404	0.929302
AGK	YLR006C	1.42373	0.926744
AGK	YER084W	0.702459	0.923203
AGK	YEL071W	2.82238	0.921078
AGK	YHR150W	1.14777	0.919097
AGK	YPL099C	2.214	0.913091
AGK	YBL012C	1.53663	0.910402
AGK	YOR190W	1.1415	0.906986
AGK	YEL059W	2.96663	0.90396
AGK	YOR363C	1.1854	0.902012
AGK	YHL024W	1.96939	0.901526
AGK	YPL195W	1.08505	0.899775
AGK	YLL016W	2.05093	0.892239
AGK	YDR322W	0.344957	0.89082
AGK	YMR111C	1.79378	0.890782
AGK	YJR025C	2.86001	0.890271
AGK	YJL004C	1.24185	0.890079
AGK	YDL037C	0.796538	0.889009
AGK	YOR252W	0.664827	0.888548
AGK	YBR068C	2.33317	0.884581
AGK	YOR275C	1.82514	0.882671
AGK	YBL066C	2.22654	0.882185
AGK	YMR011W	1.46136	0.878817
AGK	YDL162C	0.783994	0.876004
AGK	YBR041W	0.752634	0.874777
AGK	YLL047W	4.51581	0.871968
AGK	YHR035W	4.37155	0.869179
AGK	YOR334W	4.01405	0.866721
AGK	YDR135C	1.87531	0.865443
AGK	YNL249C	2.59659	0.863877
AGK	YDR098C	1.63698	0.86219
AGK	YJR037W	4.45309	0.861417
AGK	YMR167W	1.6997	0.860522
AGK	YDR132C	1.40492	0.851383
AGK	YHR179W	0.99724	0.850916
AGK	YML002W	1.3422	0.850381
AGK	YOR165W	0.884345	0.85028
AGK	YDR193W	1.71224	0.847416
AGK	YBR139W	2.18264	0.84738
AGK	YBL107C	3.04817	0.845821
AGK	YBR033W	1.69343	0.844567
AGK	YBR030W	0.884345	0.841668
AGK	YLR142W	1.86277	0.838504
AGK	YJR003C	2.12619	0.835921
AGK	YML124C	0.595835	0.833886
AGK	YDR073W	2.43979	0.833677
AGK	YOR297C	5.04265	0.824729
AGK	YER132C	2.45233	0.821635
AGK	YOR304W	2.69067	0.821045
AGK	YER108C	1.04114	0.818277
AGK	YOR033C	0.827898	0.817972
AGK	YLL038C	0.620923	0.816978
AGK	YER080W	1.76869	0.815336
AGK	YJL177W	0.470396	0.811949
AGK	YHL021C	1.36729	0.799559
AGK	YOR358W	0.758906	0.799237
AGK	YDR248C	1.09759	0.798377
AGK	YBR229C	3.18615	0.795521
AGK	YLL052C	2.81611	0.792756
AGK	YOR351C	1.6558	0.789532
AGK	YOR092W	1.36101	0.788235
AGK	YHR045W	2.76593	0.78544
AGK	YAL004W	1.41746	0.785225
AGK	YOR015W	3.24887	0.783605
AGK	YNL168C	1.53663	0.775698
AGK	YJL100W	4.57225	0.773511
AGK	YMR304C-A	3.10462	0.771526
AGK	YDL187C	6.02107	0.770996
AGK	YDR183W	0.921977	0.769395
AGK	YER178W	1.46136	0.765244
AGK	YPL261C	3.09207	0.760068
AGK	YLR023C	1.53663	0.755495
AGK	YHR094C	1.86904	0.751069
AGK	YDL241W	1.96939	0.749693
AGK	YER129W	1.31084	0.749504
AGK	YOR328W	4.03914	0.749001
AGK	YIL156W	2.67812	0.746867
AGK	YHL009C	1.37983	0.742533
AGK	YNL101W	2.65304	0.742423
AGK	YBR238C	1.52408	0.732263
AGK	YOL079W	1.76869	0.73052
AGK	YNL332W	2.2579	0.726877
AGK	YIL060W	0.501756	0.722485
AGK	YNL278W	0.827898	0.714917
AGK	YER038W-A	1.62444	0.712706
AGK	YIL073C	2.60913	0.711964
AGK	YAR002W	0.131711	0.707107
AGK	YOR356W	0.959609	0.70403
AGK	YML084W	2.91646	0.701078
AGK	YDR192C	1.59308	0.700594
AGK	YBL081W	1.21676	0.696748
AGK	YNL068C	2.03211	0.695343
AGK	YEL056W	1.98194	0.690028
AGK	YDL178W	4.99875	0.689019
AGK	YDL142C	4.14576	0.681595
AGK	YDL167C	6.27822	0.681493
AGK	YEL001C	1.83768	0.679968
AGK	YDR217C	0.671099	0.679949
AGK	YLR165C	1.10386	0.679366
AGK	YOR188W	5.15554	0.677223
AGK	YJL142C	2.42725	0.676478
AGK	YLR019W	9.33894	0.676437
AGK	YPL249C	1.26066	0.672993
AGK	YBR040W	1.19794	0.67029
AGK	YBR215W	0.48294	0.662692
AGK	YAR031W	2.79102	0.659912
AGK	YBR105C	1.3422	0.657235
AGK	YJR094C	4.71651	0.656071
AGK	YHR121W	2.11992	0.653293
AGK	YPL269W	0.476668	0.653026
AGK	YLL060C	5.58831	0.652942
AGK	YPR001W	1.59935	0.652029
AGK	YAR037W	1.42373	0.651228
AGK	YJL197W	1.30457	0.644559
AGK	YPL035C	0.445309	0.643993
AGK	YDL180W	10.4052	0.640253
AGK	YJR100C	3.83843	0.638624
AGK	YLL021W	0.783994	0.638232
AGK	YLR080W	2.32689	0.637463
AGK	YOL013C	2.2579	0.636532
AGK	YJR091C	3.2426	0.635854
AGK	YIL157C	1.66207	0.625913
AGK	YHR028C	2.6844	0.625346
AGK	YER128W	1.6558	0.624215
AGK	YHL034C	1.1415	0.620806
AGK	YPL202C	0.526844	0.61858
AGK	YDL066W	0.22579	0.618483
AGK	YDL070W	0.708731	0.61714
AGK	YLR073C	1.59935	0.614887
AGK	YJL212C	2.38961	0.614344
AGK	YOR089C	0.796538	0.614004
AGK	YER028C	1.96939	0.613921
AGK	YMR106C	1.94431	0.61
AGK	YOR376W	0.677371	0.609783
AGK	YNL334C	1.23557	0.607165
[truncated: 24,553 more rows]

## Sheet: Enhancers
Table S3. List of toxicity modifiers for the 28 human kinases.
Query (Kinase)	Subject (yeast gene deletion)	Normalized barcode counts	Z-score
ABL1	YER115C	1.18785	-0.00209484
ABL1	YMR017W	1.23757	-0.00408693
ABL1	YPL013C	0.911602	-0.00539441
ABL1	YAR029W	1.24862	-0.00574148
ABL1	YBR246W	1.1768	-0.00621335
ABL1	YPL070W	1.08287	-0.00688113
ABL1	YOR107W	1.14917	-0.00817779
ABL1	YBR058C	1.22099	-0.0146191
ABL1	YDR269C	1.76243	-0.0147318
ABL1	YLL042C	2.55249	-0.0152705
ABL1	YIL076W	0.955801	-0.0169299
ABL1	YBL107C	1.96685	-0.0224744
ABL1	YLR178C	1.01657	-0.0257894
ABL1	YJR052W	1.12707	-0.031385
ABL1	YPL065W	0.701657	-0.0358781
ABL1	YDR265W	0.513812	-0.0386592
ABL1	YHR035W	2.29834	-0.0430047
ABL1	YLL046C	3.59116	-0.0434688
ABL1	YBR232C	1.75691	-0.047478
ABL1	YER066W	1.65746	-0.0562138
ABL1	YNL193W	0.955801	-0.058904
ABL1	YDR215C	0.342541	-0.0648142
ABL1	YDR122W	2.22652	-0.0658078
ABL1	YPL152W	0.640884	-0.0689915
ABL1	YER177W	0.751381	-0.0761411
ABL1	YIL131C	1.19337	-0.0818865
ABL1	YMR294W-A	1.07735	-0.0908505
ABL1	YER088C	0.729282	-0.0917067
ABL1	YMR276W	2.40331	-0.100237
ABL1	YIL057C	0.337017	-0.106554
ABL1	YOR363C	0.530387	-0.10722
ABL1	YLR016C	1.31492	-0.112833
ABL1	YOL016C	1.58564	-0.115958
ABL1	YOR130C	0.574586	-0.116443
ABL1	YDR070C	0.983425	-0.134449
ABL1	YIR003W	2.67956	-0.146951
ABL1	YDR148C	0.734807	-0.147941
ABL1	YBR033W	1.0442	-0.150225
ABL1	YER174C	0.911602	-0.15083
ABL1	YMR162C	1.45304	-0.156212
ABL1	YOR306C	3.29834	-0.159104
ABL1	YAL053W	1.20442	-0.161447
ABL1	YNL179C	0.430939	-0.162405
ABL1	YDR290W	1.65193	-0.168951
ABL1	YOR188W	3.71271	-0.172259
ABL1	YDL035C	0.640884	-0.176657
ABL1	YPL116W	1.06077	-0.177414
ABL1	YJR053W	1.0884	-0.178606
ABL1	YOR032C	1.24862	-0.179199
ABL1	YMR012W	1.45304	-0.179787
ABL1	YJL017W	1.07735	-0.18102
ABL1	YBR053C	1.18232	-0.182443
ABL1	YPL240C	1.16575	-0.183086
ABL1	YDL170W	4.0663	-0.185233
ABL1	YMR170C	4.82873	-0.188807
ABL1	YAL022C	0.845304	-0.196044
ABL1	YDR078C	0.657459	-0.196251
ABL1	YER096W	1.74033	-0.201331
ABL1	YHR162W	0.828729	-0.204459
ABL1	YDR098C	0.900552	-0.206734
ABL1	YBR258C	1.07735	-0.211668
ABL1	YDR104C	1.04972	-0.21169
ABL1	YPL105C	0.850829	-0.211941
ABL1	YDL203C	2.76796	-0.212951
ABL1	YBR054W	1.05525	-0.213288
ABL1	YMR020W	1.32044	-0.216159
ABL1	YBR041W	0.309392	-0.22014
ABL1	YOR347C	1.64088	-0.223043
ABL1	YOL071W	1.24862	-0.223284
ABL1	YHR199C	0.624309	-0.235353
ABL1	YDR128W	1.0442	-0.243088
ABL1	YOR121C	0.21547	-0.243537
ABL1	YML071C	0.895028	-0.245607
ABL1	YER044C-A	1.70166	-0.246346
ABL1	YJL135W	2.33702	-0.24772
ABL1	YBL086C	1.04972	-0.248338
ABL1	YDL122W	0.834254	-0.249254
ABL1	YDL125C	0.469613	-0.250717
ABL1	YER071C	1.14917	-0.251675
ABL1	YHR146W	1.02762	-0.2519
ABL1	YDL154W	7.16575	-0.259862
ABL1	YJL077C	3.29834	-0.26491
ABL1	YBR057C	0.961326	-0.265877
ABL1	YHR161C	0.81768	-0.279618
ABL1	YIL117C	1.1547	-0.282025
ABL1	YDR179W-A	0.0883978	-0.283968
ABL1	YMR172W	2.64641	-0.285834
ABL1	YBR130C	0.646409	-0.289596
ABL1	YBR005W	0.98895	-0.295347
ABL1	YBR014C	0.917127	-0.295554
ABL1	YEL052W	1.62983	-0.301677
ABL1	YOR229W	0.524862	-0.305344
ABL1	YAL015C	1.14917	-0.305874
ABL1	YMR183C	1.32044	-0.306683
ABL1	YBR063C	1.07182	-0.310795
ABL1	YMR141C	1.0884	-0.311058
ABL1	YBR139W	1.18232	-0.313186
ABL1	YOR316C	2.40331	-0.313969
ABL1	YDL134C	0.928177	-0.314723
ABL1	YMR153C-A	2.0884	-0.317074
ABL1	YDL201W	1.57459	-0.322169
ABL1	YOL065C	1.27624	-0.326387
ABL1	YLR046C	0.370166	-0.327207
ABL1	YCR019W	0.98895	-0.32725
ABL1	YOR069W	1.43094	-0.333902
ABL1	YIL052C	0.751381	-0.335825
ABL1	YPL192C	1.05525	-0.3446
ABL1	YDR084C	0.629834	-0.344775
ABL1	YDL188C	1.9558	-0.345263
ABL1	YML029W	1.02762	-0.346398
ABL1	YMR040W	1.28177	-0.348601
ABL1	YJR098C	3.05525	-0.351329
ABL1	YEL047C	2.18232	-0.354622
ABL1	YJL044C	1.58564	-0.356498
ABL1	YBR248C	1.01657	-0.358058
ABL1	YBR092C	0.773481	-0.35877
ABL1	YOR318C	1.24862	-0.359207
ABL1	YMR285C	1.81215	-0.36612
ABL1	YIL167W	1.34807	-0.366992
ABL1	YDR326C	0.878453	-0.368789
ABL1	YMR320W	2.47514	-0.372487
ABL1	YBL075C	0.79558	-0.372988
ABL1	YOR381W	1.1547	-0.373169
ABL1	YML056C	0.79558	-0.374046
ABL1	YIL037C	0.00552486	-0.375771
ABL1	YPL212C	0.823204	-0.377797
ABL1	YIL007C	1.46961	-0.379095
ABL1	YBR074W	1.96685	-0.380135
ABL1	YNL200C	1.35359	-0.397244
ABL1	YDL242W	2.40884	-0.398283
ABL1	YLL032C	1.10497	-0.403402
ABL1	YBL101C	6.96133	-0.405659
ABL1	YCL036W	0.18232	-0.40654
ABL1	YBL068W	1	-0.410253
ABL1	YDR059C	1.19337	-0.41342
ABL1	YPL003W	0.552486	-0.415911
ABL1	YML059C	0.917127	-0.416086
ABL1	YJL186W	0.845304	-0.417875
ABL1	YMR111C	1.04972	-0.418421
ABL1	YPL168W	1.27624	-0.420145
ABL1	YJL216C	1.13812	-0.420643
ABL1	YJL099W	0.98895	-0.423726
ABL1	YBL066C	1.18232	-0.426885
ABL1	YER173W	0.0497238	-0.428671
ABL1	YNL262W	0.0552486	-0.43022
ABL1	YOL064C	0.0165746	-0.430713
ABL1	YMR048W	0.679558	-0.434673
ABL1	YOR320C	1.81768	-0.435667
ABL1	YNL288W	1.19337	-0.443264
ABL1	YPL006W	0.895028	-0.44392
ABL1	YJR133W	2.86188	-0.447206
ABL1	YER057C	1.24309	-0.447961
ABL1	YJR142W	0.972376	-0.4529
ABL1	YLR180W	0.552486	-0.454787
ABL1	YJR097W	1.32044	-0.455001
ABL1	YHR124W	0.59116	-0.455238
ABL1	YOL008W	0.00552486	-0.457021
ABL1	YAR031W	0.723757	-0.458178
ABL1	YAL067C	0.745856	-0.460104
ABL1	YBR217W	0.883978	-0.460578
ABL1	YNL198C	0.685083	-0.463896
ABL1	YJR129C	0.80663	-0.469047
ABL1	YOR061W	1.28729	-0.470658
ABL1	YLR126C	0.60221	-0.470793
ABL1	YJL157C	0.530387	-0.478631
ABL1	YML084W	1.30939	-0.483476
ABL1	YDR097C	1.20994	-0.484165
ABL1	YEL009C	0.0331492	-0.484262
ABL1	YDR119W	1.67956	-0.484425
ABL1	YAL030W	0.640884	-0.484634
ABL1	YML101C	2.0663	-0.4877
ABL1	YOR343C	1.62983	-0.488174
ABL1	YMR009W	0.972376	-0.48993
ABL1	YIL173W	2.23757	-0.493291
ABL1	YIL123W	0.0220994	-0.495188
ABL1	YOR340C	0.0331492	-0.497898
ABL1	YDR126W	0.00552486	-0.499229
ABL1	YMR187C	1.42541	-0.503729
ABL1	YDL168W	2.79006	-0.505088
ABL1	YNL249C	1.00552	-0.507809
ABL1	YMR317W	1.88398	-0.508253
ABL1	YML062C	0.364641	-0.509255
ABL1	YIL121W	0.359116	-0.517391
ABL1	YNL134C	1.24862	-0.519201
ABL1	YOR023C	1.32597	-0.522434
ABL1	YBR240C	1.28729	-0.524628
ABL1	YOR053W	1.09392	-0.5326
ABL1	YLR142W	0.723757	-0.534854
ABL1	YBR137W	0.790055	-0.542168
ABL1	YIL038C	4.45304	-0.54732
ABL1	YJL030W	1.08287	-0.547528
ABL1	YJL145W	0.569061	-0.549408
ABL1	YPL120W	0.977901	-0.566499
ABL1	YNL219C	0.497238	-0.56801
ABL1	YDL050C	0.00552486	-0.56905
ABL1	YJL207C	0.60221	-0.569764
ABL1	YNL178W	0.00552486	-0.57062
ABL1	YNL256W	0.00552486	-0.572587
ABL1	YNL170W	0.0165746	-0.574333
ABL1	YOR366W	0.911602	-0.581253
ABL1	YER024W	0.939227	-0.581545
ABL1	YLR138W	0.248619	-0.581746
ABL1	YPL147W	1.23757	-0.582092
ABL1	YPL098C	0.00552486	-0.582598
ABL1	YBR206W	1.21547	-0.582737
ABL1	YBR218C	0.98895	-0.584006
ABL1	YDR015C	0.883978	-0.589108
ABL1	YMR007W	0.861878	-0.594474
ABL1	YLR225C	0.651934	-0.605198
ABL1	YMR304W	0.149171	-0.605579
ABL1	YDR107C	1.0221	-0.606218
ABL1	YNL082W	1.12155	-0.607741
ABL1	YML079W	1.1989	-0.608358
ABL1	YOR090C	1.96133	-0.608495
ABL1	YER064C	1.19337	-0.610206
ABL1	YDR009W	2.20442	-0.61126
ABL1	YLL047W	2.29834	-0.612514
ABL1	YNL066W	2.19337	-0.613731
ABL1	YML030W	0.0331492	-0.616672
ABL1	YLR217W	0.038674	-0.622399
ABL1	YBR001C	1.44751	-0.622414
ABL1	YNL259C	0.508287	-0.622654
ABL1	YMR279C	1.12155	-0.623183
ABL1	YNL260C	0.00552486	-0.623279
ABL1	YHR138C	1.16022	-0.623331
ABL1	YIL044C	0.00552486	-0.624437
ABL1	YIL027C	0.00552486	-0.633828
ABL1	YNL301C	0.928177	-0.633883
ABL1	YBR022W	0.895028	-0.634559
ABL1	YOR011W	1.60221	-0.635451
ABL1	YJR020W	1.07182	-0.636736
ABL1	YJL084C	2.07182	-0.638268
ABL1	YJL082W	1.0663	-0.639207
ABL1	YER045C	0.917127	-0.639548
ABL1	YMR291W	0.734807	-0.640046
ABL1	YEL064C	0.0165746	-0.640926
ABL1	YNL076W	1.37017	-0.641247
ABL1	YDL106C	0.00552486	-0.647023
ABL1	YNL333W	0.933702	-0.647623
ABL1	YIL056W	3.16022	-0.648303
ABL1	YNL266W	1.04972	-0.648989
ABL1	YDL010W	0.00552486	-0.653135
ABL1	YDL142C	2.77348	-0.654571
ABL1	YDR231C	0.038674	-0.658048
ABL1	YML022W	0.955801	-0.658512
ABL1	YLR013W	0.872928	-0.65908
ABL1	YER089C	0.546961	-0.660197
ABL1	YHR082C	0.491713	-0.66451
ABL1	YER092W	0.00552486	-0.667768
ABL1	YDR225W	0.00552486	-0.667892
ABL1	YLR114C	0.696133	-0.673377
ABL1	YDR133C	1.0884	-0.674325
ABL1	YJR127C	1.40884	-0.676379
ABL1	YMR175w	0.0165746	-0.677784
ABL1	YMR102C	0.78453	-0.682799
ABL1	YBR157C	0.430939	-0.683057
ABL1	YBR040W	0.248619	-0.688497
ABL1	YML116W	1.36464	-0.6888
ABL1	YPL138C	0.0276243	-0.693677
ABL1	YEL041W	1.35359	-0.696117
ABL1	YBL072C	0.0331492	-0.698337
ABL1	YPL150W	0.469613	-0.698835
ABL1	YAL026C	0.00552486	-0.703991
ABL1	YAL068C	1.29834	-0.7043
ABL1	YOR040W	0.889503	-0.70481
ABL1	YNL099C	1.8674	-0.705401
ABL1	YMR253C	0.872928	-0.706034
ABL1	YML018C	0.00552486	-0.706179
ABL1	YMR132C	0.486188	-0.708606
ABL1	YDR087C	0.0165746	-0.709254
ABL1	YOR170W	0.00552486	-0.709807
ABL1	YMR311C	0.850829	-0.71253
ABL1	YMR259C	1.29834	-0.71412
ABL1	YDL104C	0.0276243	-0.715021
ABL1	YNL130C	0.80663	-0.716694
ABL1	YDR061W	0.79558	-0.716767
ABL1	YOR334W	1.98895	-0.718919
ABL1	YNL304W	1.25414	-0.721629
ABL1	YJR106W	0.872928	-0.722419
ABL1	YLL048C	0.972376	-0.723906
ABL1	YDR317W	0.00552486	-0.724556
ABL1	YHR157W	0.21547	-0.726539
ABL1	YOL037C	0.353591	-0.728391
ABL1	YDR186C	0.038674	-0.732312
ABL1	YLR058C	0.40884	-0.734774
ABL1	YLR190W	0.0165746	-0.735023
ABL1	YDL174C	4.07182	-0.737135
ABL1	YJL103C	0.61326	-0.738239
ABL1	YHR167W	0.0110497	-0.740926
ABL1	YOR335C	0.0110497	-0.74137
ABL1	YDL227C	3.0884	-0.741832
ABL1	YJR109C	2.69613	-0.742
ABL1	YCR014C	0.00552486	-0.745204
ABL1	YBR007C	1.09392	-0.752716
ABL1	YMR107W	0.441989	-0.760856
ABL1	YLR017W	1.28729	-0.762618
ABL1	YOR081C	0.513812	-0.766916
ABL1	YNL122C	0.961326	-0.767341
ABL1	YNL094W	0.966851	-0.770718
ABL1	YOR283W	1.10497	-0.773118
ABL1	YDL065C	0.00552486	-0.773577
ABL1	YBR045C	1.1105	-0.773693
ABL1	YIL110W	0.0165746	-0.777627
ABL1	YOR043W	0.607735	-0.778702
ABL1	YJL123C	1.05525	-0.779675
ABL1	YJL210W	0.823204	-0.78048
ABL1	YDR120C	0.0110497	-0.782321
ABL1	YBR205W	1.25967	-0.785304
ABL1	YNL063W	2.62431	-0.785841
ABL1	YML017W	1.07735	-0.786685
ABL1	YPL046C	0.0220994	-0.787541
ABL1	YBL011W	0.464088	-0.787763
ABL1	YBR083W	0.530387	-0.791485
ABL1	YMR305C	0.00552486	-0.793771
ABL1	YDR034C	0.232044	-0.794713
ABL1	YIR001C	1.28729	-0.7982
ABL1	YIL137C	1.20442	-0.801688
ABL1	YLL055W	0.78453	-0.805059
ABL1	YDL046W	0.0441989	-0.806949
ABL1	YOR171C	0.00552486	-0.807321
ABL1	YLR213C	0.00552486	-0.809516
ABL1	YOR311C	0.0165746	-0.809844
ABL1	YJL107C	1.43646	-0.812974
ABL1	YDL054C	0.00552486	-0.813272
ABL1	YER185W	0.718232	-0.813421
ABL1	YJR099W	1.53591	-0.814435
ABL1	YJL132W	1.14365	-0.816026
ABL1	YEL017W	0.0110497	-0.819289
ABL1	YJL212C	0.966851	-0.820379
ABL1	YDR056C	0.60221	-0.820413
ABL1	YJR066W	0.0110497	-0.822061
ABL1	YDR251W	0.00552486	-0.825727
ABL1	YHR103W	0.00552486	-0.829051
ABL1	YJR009C	1.01657	-0.829501
ABL1	YIL065C	0.00552486	-0.8317
ABL1	YOR009W	1.02762	-0.831897
ABL1	YOR022C	0.950276	-0.834946
ABL1	YIL055C	1.07735	-0.8352
ABL1	YNL329C	0.640884	-0.839772
ABL1	YLR053C	0.0165746	-0.840824
ABL1	YJL193W	0.00552486	-0.841709
ABL1	YOR338W	0.585635	-0.841742
ABL1	YHR017W	0.00552486	-0.84336
ABL1	YJR082C	1.28177	-0.845628
ABL1	YPL220W	0.0110497	-0.845636
ABL1	YBR056W	0.00552486	-0.858085
ABL1	YNL175C	0.00552486	-0.858489
ABL1	YPL014W	0.458564	-0.862312
ABL1	YHL006C	0.0331492	-0.865577
ABL1	YNL100W	0.668508	-0.865915
ABL1	YDR203W	0.00552486	-0.868434
ABL1	YML051W	0.861878	-0.869545
ABL1	YBR012C	0.690608	-0.869655
ABL1	YER066C-A	0.00552486	-0.870101
ABL1	YOL059W	0.0165746	-0.871308
ABL1	YHL017W	0.00552486	-0.871407
ABL1	YJL177W	0.0110497	-0.873957
ABL1	YOR042W	0.546961	-0.875511
ABL1	YMR316W	0.657459	-0.876786
ABL1	YLR042C	0.994475	-0.878172
ABL1	YOL070C	0.519337	-0.8782
ABL1	YNL212W	0.0165746	-0.879889
ABL1	YMR008C	0.585635	-0.883344
ABL1	YPL214C	0.00552486	-0.884273
ABL1	YOR178C	0.00552486	-0.887955
ABL1	YJR075W	0.0331492	-0.888407
ABL1	YJL121C	0.0110497	-0.89131
ABL1	YLR118C	0.745856	-0.892906
ABL1	YDL024C	0.0441989	-0.89327
ABL1	YDL041W	0.0110497	-0.899974
ABL1	YDR297W	0.756906	-0.900193
ABL1	YOR006C	0.00552486	-0.902571
ABL1	YDR090C	1.03867	-0.902761
ABL1	YMR154C	2.16022	-0.903286
ABL1	YAL059W	0.00552486	-0.905757
ABL1	YJL218W	0.0276243	-0.906138
ABL1	YIL159W	0.546961	-0.908865
ABL1	YOR089C	0.0110497	-0.909543
ABL1	YBR050C	2.45304	-0.911003
ABL1	YOL007C	0.176796	-0.913292
ABL1	YOR253W	0.696133	-0.914376
ABL1	YDL186W	2.43094	-0.915424
ABL1	YPL159C	0.480663	-0.915642
ABL1	YHL047C	0.464088	-0.918355
ABL1	YOR213C	0.00552486	-0.921324
ABL1	YOR267C	0.00552486	-0.922745
ABL1	YAL058W	0.0276243	-0.923369
ABL1	YOR271C	0.0110497	-0.925757
ABL1	YLR125W	0.325967	-0.925874
ABL1	YER058W	0.0165746	-0.926462
ABL1	YNL204C	0.00552486	-0.927088
ABL1	YDL213C	0.00552486	-0.927309
ABL1	YMR114C	0.558011	-0.929128
ABL1	YMR226C	0.00552486	-0.929356
ABL1	YER156C	0.0165746	-0.929372
ABL1	YDR022C	1.97238	-0.929582
ABL1	YHL016C	0.00552486	-0.92972
ABL1	YPL114W	0.0110497	-0.931583
ABL1	YJR049C	0.0662983	-0.93201
ABL1	YMR216C	0.00552486	-0.93604
ABL1	YCL037C	0.00552486	-0.938382
ABL1	YNL123W	0.585635	-0.94054
ABL1	YLR025W	0.0110497	-0.94115
ABL1	YDL089W	0.0220994	-0.941486
ABL1	YEL010W	0.0165746	-0.941628
ABL1	YER165C-A	0.0220994	-0.945838
ABL1	YLL009C	0.0110497	-0.947131
ABL1	YOR195W	0.0165746	-0.947276
ABL1	YMR306W	1.14365	-0.948633
ABL1	YLR122C	1.12707	-0.952018
ABL1	YOR118W	0.0220994	-0.953085
ABL1	YDL123W	0.41989	-0.953394
ABL1	YOL053C-A	0.00552486	-0.955439
ABL1	YML048W	0.00552486	-0.955769
ABL1	YOR150W	0.0331492	-0.956354
ABL1	YDL160C	0.00552486	-0.957666
ABL1	YCL008C	0.00552486	-0.959174
ABL1	YLL041C	0.038674	-0.959993
ABL1	YIL125W	0.0110497	-0.960337
ABL1	YDL109C	1.14365	-0.964575
ABL1	YCL055W	0.00552486	-0.966589
ABL1	YLL054C	1.12707	-0.968522
ABL1	YBR062C	0.0331492	-0.968539
ABL1	YHR142W	0.038674	-0.968646
ABL1	YLR089C	0.00552486	-0.970247
ABL1	YDL094C	0.0331492	-0.971854
ABL1	YMR096W	0.558011	-0.972859
ABL1	YLL020C	0.038674	-0.973323
ABL1	YIL028W	0.0276243	-0.973851
ABL1	YLR112W	0.337017	-0.97603
ABL1	YJR148W	1.0442	-0.976434
ABL1	YJL144W	0.0441989	-0.977263
ABL1	YHR108W	0.00552486	-0.978688
ABL1	YOR106W	0.00552486	-0.981155
ABL1	YDL129W	0.729282	-0.981323
ABL1	YIL077C	0.00552486	-0.981994
ABL1	YIL032C	0.0276243	-0.983892
ABL1	YCL022C	0.0276243	-0.984389
ABL1	YOR051C	0.0220994	-0.984715
ABL1	YOR084W	0.0110497	-0.985526
ABL1	YOR064C	0.0110497	-0.986985
ABL1	YHR094C	0.314917	-0.989487
ABL1	YIR014W	2.21547	-0.989561
ABL1	YLR187W	0.00552486	-0.994418
ABL1	YAL056W	0.0165746	-0.996408
ABL1	YPL232W	0.0165746	-0.997463
ABL1	YCR008W	0.00552486	-0.998548
ABL1	YJL206C-A	0.00552486	-1.00108
ABL1	YIL001W	0.0276243	-1.00368
ABL1	YNL214W	0.0110497	-1.00505
ABL1	YER146W	0.0110497	-1.00523
ABL1	YDR277C	0.0220994	-1.00557
ABL1	YER048C	0.0441989	-1.00622
ABL1	YNL077W	0.0220994	-1.00786
ABL1	YDL131W	0.038674	-1.00858
ABL1	YOR154W	0.0276243	-1.00864
ABL1	YMR124W	0.00552486	-1.00979
ABL1	YML109W	0.0276243	-1.0138
ABL1	YOR367W	0.00552486	-1.01604
ABL1	YCL035C	0.00552486	-1.01678
ABL1	YDR193W	0.00552486	-1.01781
ABL1	YOR333C	1.98343	-1.01945
ABL1	YLR006C	0.00552486	-1.02146
ABL1	YOL025W	0.00552486	-1.02191
ABL1	YOR314W	0.0110497	-1.02197
ABL1	YMR274C	1.13812	-1.02209
ABL1	YOR215C	0.0331492	-1.02328
ABL1	YER072W	0.0110497	-1.02343
ABL1	YLR111W	0.0607735	-1.02636
ABL1	YBR176W	0.0165746	-1.02678
ABL1	YMR022W	1.25414	-1.02719
ABL1	YER084W	0.0276243	-1.02753
ABL1	YIL041W	0.0220994	-1.02757
ABL1	YOR111W	0.00552486	-1.02938
ABL1	YBL088C	0.00552486	-1.0311
ABL1	YDR219C	0.0441989	-1.03294
ABL1	YDL019C	0.00552486	-1.03357
ABL1	YDR262W	0.0110497	-1.03741
ABL1	YHL027W	0.21547	-1.03807
ABL1	YDR304C	0.038674	-1.03824
ABL1	YOL002C	0.00552486	-1.03883
ABL1	YNL085W	0.955801	-1.04056
ABL1	YDR163W	0.00552486	-1.04136
ABL1	YEL060C	0.00552486	-1.04218
ABL1	YLL013C	0.038674	-1.04413
ABL1	YDR018C	1.16022	-1.04797
ABL1	YOR298W	1.17127	-1.04839
ABL1	YNL321W	1.28729	-1.04923
ABL1	YOR162C	0.0220994	-1.0509
ABL1	YOL060C	0.00552486	-1.05108
ABL1	YBR180W	0.038674	-1.05164
ABL1	YLR192C	0.933702	-1.05314
ABL1	YDR046C	1.54144	-1.05428
ABL1	YHR206W	0.0331492	-1.05435
ABL1	YPL203W	0.038674	-1.05474
ABL1	YHR022C	0.491713	-1.05552
ABL1	YPL247C	0.00552486	-1.05785
ABL1	YOR152C	3.75138	-1.05824
ABL1	YJL148W	0.0276243	-1.05925
ABL1	YOR034C	0.00552486	-1.05969
ABL1	YAL034C	0.0110497	-1.06037
ABL1	YAL049C	0.0276243	-1.06069
ABL1	YIL132C	0.701657	-1.0661
ABL1	YML102W	0.00552486	-1.06636
ABL1	YMR140W	1.05525	-1.06663
ABL1	YMR201C	0.00552486	-1.06682
ABL1	YBR215W	0.00552486	-1.06736
ABL1	YAR028W	0.0331492	-1.06775
ABL1	YLR012C	0.618785	-1.06817
ABL1	YDR134C	1.22652	-1.0687
ABL1	YPL181W	0.0110497	-1.06882
ABL1	YJL013C	0.558011	-1.06967
ABL1	YHR195W	0.00552486	-1.0697
ABL1	YDR306C	0.00552486	-1.07066
ABL1	YLR098C	0.00552486	-1.07137
ABL1	YIL011W	0.0441989	-1.07185
ABL1	YLL051C	0.961326	-1.0745
ABL1	YNL324W	0.00552486	-1.0746
ABL1	YJL112W	0.900552	-1.07555
ABL1	YMR313C	0.403315	-1.07589
ABL1	YNL154C	0.0276243	-1.0763
ABL1	YHR123W	0.0110497	-1.07647
ABL1	YBL002W	0.0110497	-1.07781
ABL1	YMR127C	0.0110497	-1.08045
ABL1	YBR144C	0.00552486	-1.08063
ABL1	YML004C	0.259669	-1.08069
ABL1	YJR120W	0.00552486	-1.08113
ABL1	YDR218C	0.00552486	-1.0813
ABL1	YML089C	0.906077	-1.08152
ABL1	YEL038W	0.0331492	-1.08158
ABL1	YOR300W	2.10497	-1.08224
ABL1	YDR144C	0.00552486	-1.08291
ABL1	YBL094C	0.00552486	-1.08497
ABL1	YOR134W	0.0220994	-1.08532
ABL1	YOR292C	0.00552486	-1.08658
ABL1	YOL003C	0.0110497	-1.08705
ABL1	YMR186W	0.0331492	-1.08719
ABL1	YPL257W	0.00552486	-1.08767
ABL1	YJL073W	0.779006	-1.08987
ABL1	YJL052W	0.0110497	-1.09011
ABL1	YMR306C-A	0.453039	-1.09013
ABL1	YOR378W	0.165746	-1.09129
ABL1	YHR121W	0.662983	-1.0949
ABL1	YNL160W	0.0165746	-1.09596
ABL1	YEL005C	0.0276243	-1.09617
ABL1	YIL072W	0.00552486	-1.09693
ABL1	YDL218W	1.1326	-1.09861
ABL1	YHR078W	0.00552486	-1.09864
ABL1	YBR052C	0.861878	-1.09954
ABL1	YOR165W	0.00552486	-1.10028
ABL1	YBL069W	0.00552486	-1.10079
ABL1	YNL230C	0.0110497	-1.101
ABL1	YDL027C	0.0110497	-1.10352
ABL1	YMR002W	0.00552486	-1.10407
ABL1	YOR091W	0.0220994	-1.1041
ABL1	YER067W	0.0220994	-1.10704
ABL1	YBR069C	0.0441989	-1.10709
ABL1	YML019W	0.127072	-1.10771
ABL1	YHR136C	0.00552486	-1.10785
ABL1	YLR064W	0.0718232	-1.10786
ABL1	YOR044W	0.0110497	-1.10854
ABL1	YLL058W	1.26519	-1.11126
ABL1	YJR069C	0.0276243	-1.11542
ABL1	YPL064C	0.0110497	-1.11634
ABL1	YMR234W	0.00552486	-1.1181
ABL1	YNL205C	0.00552486	-1.11851
ABL1	YIL066C	1.12707	-1.1187
ABL1	YMR232W	1.06077	-1.11871
ABL1	YBR067C	0.0110497	-1.12257
ABL1	YHL041W	0.0773481	-1.12318
ABL1	YJR070C	0.00552486	-1.12348
ABL1	YBR161W	0.0276243	-1.12404
ABL1	YER172C-A	0.00552486	-1.12799
ABL1	YMR029C	0.00552486	-1.12828
ABL1	YDL049C	0.00552486	-1.1312
ABL1	YNL070W	0.0110497	-1.13247
ABL1	YOL013C	0.569061	-1.13257
ABL1	YMR252C	0.469613	-1.13283
ABL1	YNL278W	0.00552486	-1.13286
ABL1	YBR064W	1.12707	-1.13423
ABL1	YBR244W	3.41436	-1.13437
ABL1	YDR248C	0.0441989	-1.13701
ABL1	YBR059C	0.955801	-1.13715
ABL1	YCL023C	2.57459	-1.1376
ABL1	YMR254C	0.00552486	-1.13951
ABL1	YDL167C	1.49724	-1.13967
ABL1	YBR188C	0.00552486	-1.14108
ABL1	YJL024C	0.00552486	-1.1413
ABL1	YML078W	0.535912	-1.14167
ABL1	YJR115W	1.07182	-1.14188
ABL1	YPL201C	0.00552486	-1.14332
ABL1	YAL042W	0.0552486	-1.14415
ABL1	YPL258C	0.104972	-1.14433
ABL1	YER053C	0.0110497	-1.14486
ABL1	YOL031C	0.0276243	-1.14529
ABL1	YJL064W	1.22652	-1.1453
ABL1	YMR153W	1.14365	-1.14912
ABL1	YJL055W	0.972376	-1.14973
ABL1	YJR030C	0.00552486	-1.15103
ABL1	YMR278W	1.70166	-1.15345
ABL1	YER163C	0.0497238	-1.15453
ABL1	YNL052W	0.0497238	-1.15652
ABL1	YBL028C	0.00552486	-1.15745
ABL1	YIL012W	0.00552486	-1.15905
ABL1	YMR126C	0.00552486	-1.16053
ABL1	YPL133C	0.0220994	-1.16135
ABL1	YMR133W	0.0220994	-1.16157
ABL1	YDL053C	0.0110497	-1.1657
ABL1	YLL017W	0.0110497	-1.16602
ABL1	YCR005C	0.00552486	-1.1683
ABL1	YJR137C	0.0883978	-1.16839
ABL1	YDL178W	1.92265	-1.1684
ABL1	YER158C	0.0110497	-1.17214
ABL1	YDR152W	0.00552486	-1.17292
ABL1	YDL078C	0.0497238	-1.17437
ABL1	YJL185C	0.0276243	-1.17465
ABL1	YEL006W	0.0276243	-1.1747
ABL1	YBR043C	0.0110497	-1.17481
ABL1	YDR146C	0.0110497	-1.17636
ABL1	YER097W	0.00552486	-1.17954
ABL1	YBR212W	0.0331492	-1.17968
ABL1	YHR193C	0.00552486	-1.1802
ABL1	YML087C	1.20994	-1.18048
ABL1	YPL139C	0.0110497	-1.1806
ABL1	YNL083W	0.00552486	-1.18067
ABL1	YPL187W	0.038674	-1.18231
ABL1	YDL086W	0.00552486	-1.18355
ABL1	YOR180C	0.447514	-1.1841
ABL1	YHL028W	0.0220994	-1.18712
ABL1	YDR244W	0.00552486	-1.18752
ABL1	YBL005W	0.0552486	-1.1877
ABL1	YPL246C	0.0773481	-1.18845
ABL1	YNL051W	0.00552486	-1.18919
ABL1	YMR303C	0.00552486	-1.18928
ABL1	YNL201C	0.0607735	-1.18936
ABL1	YOR357C	0.038674	-1.18953
ABL1	YHR045W	0.486188	-1.1897
ABL1	YJR061W	0.596685	-1.18982
ABL1	YML055W	0.0165746	-1.19011
ABL1	YOR297C	1.20442	-1.19064
ABL1	YPL272C	0.0110497	-1.19135
ABL1	YHL037C	0.00552486	-1.19172
ABL1	YLR154C	0.00552486	-1.19413
ABL1	YPL107W	0.00552486	-1.19444
ABL1	YAR030C	0.0220994	-1.19484
ABL1	YNL173C	0.00552486	-1.196
ABL1	YIL166C	0.00552486	-1.19629
ABL1	YJR015W	0.00552486	-1.19757
ABL1	YEL015W	0.0220994	-1.19938
ABL1	YDR181C	0.0220994	-1.19961
ABL1	YOR323C	0.0110497	-1.19976
ABL1	YJR021C	0.038674	-1.20011
ABL1	YHR079C	0.0331492	-1.20019
ABL1	YLR028C	0.00552486	-1.20115
ABL1	YLR004C	0.0220994	-1.20209
ABL1	YER056C	0.0718232	-1.2022
ABL1	YBR104W	0.00552486	-1.20282
ABL1	YNL242W	0.00552486	-1.20371
ABL1	YPL034W	1.16022	-1.20472
ABL1	YPL089C	0.00552486	-1.2052
ABL1	YOR356W	0.0276243	-1.20572
ABL1	YHR155W	0.0662983	-1.20675
ABL1	YAL012W	1.1768	-1.2074
ABL1	YCR006C	0.0441989	-1.2082
ABL1	YDR057W	0.00552486	-1.20968
ABL1	YOR233W	0.038674	-1.21203
ABL1	YOR286W	0.00552486	-1.21267
ABL1	YHR137W	0.00552486	-1.2135
ABL1	YHR182W	0.0607735	-1.2152
ABL1	YBR177C	0.00552486	-1.21712
ABL1	YMR042W	0.038674	-1.21729
ABL1	YJR100C	0.558011	-1.21888
ABL1	YEL018W	0.0220994	-1.21894
ABL1	YPL179W	0.138122	-1.22078
ABL1	YDR307W	0.0497238	-1.22114
ABL1	YOL046C	0.00552486	-1.22118
ABL1	YMR181C	0.0276243	-1.22158
ABL1	YPL250C	0.0441989	-1.22397
ABL1	YLR040C	0.220994	-1.22469
ABL1	YER049W	0.143646	-1.22642
ABL1	YIL168W	0.845304	-1.22716
ABL1	YDL176W	4.32044	-1.23213
ABL1	YIL042C	0.00552486	-1.23302
ABL1	YBR094W	0.0110497	-1.23303
ABL1	YNL327W	0.0220994	-1.23314
ABL1	YNL265C	0.00552486	-1.23577
ABL1	YDL036C	0.0662983	-1.23602
ABL1	YOR161C	1.58564	-1.23623
ABL1	YOR086C	0.00552486	-1.23789
ABL1	YDR312W	0.0276243	-1.23819
ABL1	YCL051W	0.00552486	-1.2384
ABL1	YPL222W	0.0276243	-1.24047
ABL1	YMR105C	0.00552486	-1.24052
ABL1	YEL023C	0.0276243	-1.24147
ABL1	YJR005W	0.0441989	-1.24395
ABL1	YMR255W	0.00552486	-1.24462
ABL1	YHR180W	0.845304	-1.24656
ABL1	YMR171C	0.00552486	-1.24666
ABL1	YAL062W	0.0276243	-1.24697
ABL1	YOR058C	0.0165746	-1.24787
ABL1	YLR152C	0.0220994	-1.24834
ABL1	YOR208W	0.00552486	-1.24881
ABL1	YHR181W	0.0276243	-1.24888
ABL1	YMR215W	0.0220994	-1.2553
ABL1	YOR380W	0.0165746	-1.25543
ABL1	YNL292W	0.0220994	-1.25581
ABL1	YBR170C	0.0276243	-1.2583
ABL1	YNL285W	0.0110497	-1.25873
ABL1	YMR316C-A	0.00552486	-1.25901
ABL1	YER059W	0.640884	-1.26012
ABL1	YBR034C	0.0110497	-1.26051
ABL1	YER081W	0.0110497	-1.26186
ABL1	YOR242C	0.0110497	-1.26192
ABL1	YNL338W	0.00552486	-1.26327
ABL1	YMR223W	0.0276243	-1.26334
ABL1	YML113W	0.00552486	-1.26411
ABL1	YBL037W	0.00552486	-1.26728
ABL1	YJL021C	0.0441989	-1.26739
ABL1	YPL184C	0.0110497	-1.26779
ABL1	YJL190C	0.0220994	-1.2702
ABL1	YOR263C	0.0110497	-1.2703
ABL1	YJR026W	0.00552486	-1.27226
ABL1	YNL054W	0.0276243	-1.27233
ABL1	YJL020C	0.0110497	-1.27311
ABL1	YPL182C	0.00552486	-1.27324
ABL1	YPL170W	0.00552486	-1.27423
ABL1	YJR117W	1.35359	-1.27429
ABL1	YJR095W	0.00552486	-1.27457
ABL1	YER153C	0.00552486	-1.27686
ABL1	YNL257C	0.497238	-1.2775
ABL1	YJR108W	0.00552486	-1.27777
ABL1	YDL072C	0.0110497	-1.27835
ABL1	YBR219C	0.00552486	-1.27928
ABL1	YDL237W	0.248619	-1.27964
ABL1	YPL249C	0.0276243	-1.28002
ABL1	YLL057C	0.972376	-1.28007
ABL1	YDR309C	0.0497238	-1.28352
ABL1	YPL115C	0.0276243	-1.28704
ABL1	YIL084C	0.00552486	-1.28814
ABL1	YDL088C	0.00552486	-1.29
ABL1	YHR143W	0.0110497	-1.29195
ABL1	YBR090C-A	0.00552486	-1.29261
ABL1	YJL022W	0.00552486	-1.29264
ABL1	YOR158W	0.0331492	-1.2937
ABL1	YHR104W	0.00552486	-1.29377
ABL1	YOR002W	0.0220994	-1.29466
ABL1	YJL016W	1.10497	-1.29546
ABL1	YPL048W	0.0441989	-1.2955
ABL1	YER087C-A	0.0165746	-1.29566
ABL1	YNL318C	0.0110497	-1.29581
ABL1	YEL042W	0.0165746	-1.29675
ABL1	YBR019C	0.00552486	-1.29736
ABL1	YJL118W	0.0662983	-1.2988
ABL1	YBR093C	0.0331492	-1.29977
ABL1	YDL069C	0.0220994	-1.29992
ABL1	YCR023C	0.00552486	-1.30158
ABL1	YCL012W	0.00552486	-1.30166
ABL1	YDR100W	0.0110497	-1.30272
ABL1	YIL096C	0.0276243	-1.3028
ABL1	YPL207W	0.0165746	-1.30355
ABL1	YLR059C	0.00552486	-1.30449
ABL1	YBL070C	0.0220994	-1.30605
ABL1	YOL015W	0.00552486	-1.3074
ABL1	YAL066W	0.0220994	-1.30862
ABL1	YNL091W	0.00552486	-1.30867
ABL1	YML076C	0.0110497	-1.30889
ABL1	YPL145C	0.712707	-1.3089
ABL1	YOR025W	0.00552486	-1.31206
ABL1	YHR117W	0.0276243	-1.31217
ABL1	YOR097C	0.0165746	-1.31224
ABL1	YOR054C	0.00552486	-1.31254
ABL1	YPL162C	0.0220994	-1.31384
ABL1	YOL061W	0.0828729	-1.31569
ABL1	YLR038C	0.0110497	-1.31615
ABL1	YDR230W	0.00552486	-1.3171
ABL1	YER187W	0.00552486	-1.31753
ABL1	YOL062C	0.0165746	-1.31765
ABL1	YDL135C	0.0607735	-1.31829
ABL1	YOR068C	0.773481	-1.3185
ABL1	YOR324C	0.0110497	-1.31931
ABL1	YOL019W	0.00552486	-1.31953
ABL1	YDR019C	1.0442	-1.32168
ABL1	YOR013W	0.00552486	-1.32498
ABL1	YOL075C	0.104972	-1.32543
ABL1	YOR125C	0.0441989	-1.32575
ABL1	YHR033W	0.801105	-1.32614
ABL1	YLL028W	0.0110497	-1.32821
ABL1	YBR150C	0.00552486	-1.32887
ABL1	YLR211C	0.0220994	-1.32924
ABL1	YJL116C	1.06077	-1.32932
ABL1	YJL089W	0.668508	-1.32957
ABL1	YML060W	0.00552486	-1.33211
ABL1	YOR052C	0.0331492	-1.33273
ABL1	YNL068C	0.00552486	-1.33279
ABL1	YIL045W	0.0110497	-1.33415
ABL1	YEL066W	0.00552486	-1.33554
ABL1	YOR325W	2.60773	-1.33566
ABL1	YPL015C	0.209945	-1.33571
ABL1	YDL161W	1.78453	-1.33772
ABL1	YAL065C	0.00552486	-1.33824
ABL1	YPL227C	0.0607735	-1.33861
ABL1	YML082W	0.0718232	-1.33971
ABL1	YEL062W	0.0110497	-1.33993
ABL1	YIL085C	0.701657	-1.34011
ABL1	YMR299C	0.00552486	-1.34027
ABL1	YDR261C	0.00552486	-1.34071
ABL1	YER060W-A	0.0441989	-1.34195
ABL1	YLL059C	0.0441989	-1.34382
ABL1	YJL049W	1.34807	-1.34476
ABL1	YBR224W	0.0110497	-1.34498
ABL1	YBR075W	0.0110497	-1.34513
ABL1	YCL046W	0.0220994	-1.34535
ABL1	YDR112W	0.00552486	-1.34543
ABL1	YML088W	0.469613	-1.34606
ABL1	YOR041C	0.0331492	-1.34736
ABL1	YDR192C	0.0441989	-1.34838
ABL1	YBL019W	0.00552486	-1.34961
ABL1	YDR273W	0.0441989	-1.34999
ABL1	YLR063W	0.00552486	-1.35257
ABL1	YER085C	0.00552486	-1.35359
ABL1	YMR209C	0.00552486	-1.35388
ABL1	YPL041C	0.00552486	-1.35464
ABL1	YBL009W	0.00552486	-1.35612
ABL1	YJL067W	0.0110497	-1.3565
ABL1	YML131W	0.348066	-1.35684
ABL1	YBR183W	0.0110497	-1.35788
ABL1	YMR100W	0.0220994	-1.35963
ABL1	YDL190C	0.0331492	-1.36066
ABL1	YML058C-A	0.00552486	-1.36232
ABL1	YEL049W	0.0165746	-1.36323
ABL1	YMR316C-B	0.00552486	-1.36424
ABL1	YLR420W	0.0110497	-1.36458
ABL1	YMR302C	0.0110497	-1.36566
ABL1	YCL024W	0.0110497	-1.36591
ABL1	YMR292W	0.00552486	-1.36624
ABL1	YOR173W	0.0110497	-1.36767
ABL1	YDL070W	0.00552486	-1.36786
ABL1	YEL039C	0.00552486	-1.36917
ABL1	YHR003C	0.895028	-1.37004
ABL1	YER031C	0.0276243	-1.37113
ABL1	YDR314C	0.0165746	-1.37155
ABL1	YOR193W	0.0110497	-1.37157
ABL1	YLR099C	0.00552486	-1.37356
ABL1	YER157W	0.0165746	-1.37363
ABL1	YDR206W	0.0331492	-1.37412
ABL1	YER178W	0.0276243	-1.37571
ABL1	YOL036W	0.0718232	-1.37579
ABL1	YDR096W	0.0497238	-1.37622
ABL1	YDR085C	0.0331492	-1.3763
ABL1	YMR251W-A	0.00552486	-1.37819
ABL1	YHR077C	0.00552486	-1.37825
ABL1	YAL060W	0.0165746	-1.37932
ABL1	YDR108W	0.0110497	-1.37959
ABL1	YDR029W	1.09392	-1.37974
ABL1	YDR256C	0.0110497	-1.37983
ABL1	YBR147W	0.0220994	-1.3833
ABL1	YPL199C	0.0441989	-1.38364
ABL1	YHR073W	0.0110497	-1.38379
ABL1	YLR031W	0.0220994	-1.38434
ABL1	YML001W	0.0441989	-1.38608
ABL1	YHR152W	0.0110497	-1.38723
ABL1	YDR286C	0.00552486	-1.38987
ABL1	YDR030C	1	-1.38992
ABL1	YDR089W	1.22652	-1.3921
ABL1	YBR084W	0.0165746	-1.39219
ABL1	YPL261C	0.00552486	-1.39369
ABL1	YJR126C	0.038674	-1.3945
ABL1	YLR073C	0.00552486	-1.39679
ABL1	YNL274C	0.977901	-1.39702
ABL1	YHR209W	0.00552486	-1.39715
ABL1	YLL063C	0.00552486	-1.39746
ABL1	YJL171C	0.0220994	-1.39819
ABL1	YLR109W	0.0165746	-1.39911
ABL1	YDR055W	0.00552486	-1.39942
ABL1	YIL088C	0.0276243	-1.39973
ABL1	YMR148W	0.0165746	-1.39981
ABL1	YDR178W	0.00552486	-1.39982
ABL1	YOR327C	0.646409	-1.40025
ABL1	YER167W	0.0110497	-1.40183
ABL1	YDR073W	0.40884	-1.4026
ABL1	YJR059W	0.00552486	-1.4026
ABL1	YIL120W	2.62983	-1.40466
ABL1	YNL270C	0.0220994	-1.40715
ABL1	YPL274W	0.0165746	-1.4073
ABL1	YLR024C	0.00552486	-1.40761
ABL1	YBR262C	0.0165746	-1.40769
ABL1	YHR139C	0.0276243	-1.40793
ABL1	YOR291W	0.0110497	-1.40873
ABL1	YBR164C	0.0110497	-1.41034
ABL1	YDR111C	0.00552486	-1.41132
ABL1	YJL181W	0.00552486	-1.41133
ABL1	YLR035C	0.0220994	-1.41263
ABL1	YOR007C	0.0110497	-1.41322
ABL1	YOL011W	0.00552486	-1.4146
ABL1	YOR268C	0.00552486	-1.41464
ABL1	YDL236W	0.0165746	-1.41532
ABL1	YHR131C	0.00552486	-1.41575
ABL1	YEL001C	0.0165746	-1.41576
ABL1	YDL229W	0.00552486	-1.41616
ABL1	YEL016C	0.00552486	-1.41889
ABL1	YDR252W	0.038674	-1.42096
ABL1	YJL215C	0.00552486	-1.42197
ABL1	YMR271C	0.895028	-1.42652
ABL1	YJL036W	0.0607735	-1.42682
ABL1	YOL055C	0.00552486	-1.42782
ABL1	YDL169C	0.59116	-1.42841
ABL1	YER011W	0.0828729	-1.42863
ABL1	YDR216W	0.0331492	-1.42893
ABL1	YHR092C	0.00552486	-1.43045
ABL1	YOL082W	0.0331492	-1.43058
ABL1	YNL090W	0.480663	-1.43179
ABL1	YNL106C	0.0441989	-1.43272
ABL1	YHR189W	0.00552486	-1.43287
ABL1	YAL046C	0.00552486	-1.43478
ABL1	YMR204C	0.0497238	-1.43542
ABL1	YNL316C	0.00552486	-1.43597
ABL1	YMR206W	0.00552486	-1.4364
ABL1	YHR015W	0.0497238	-1.43723
ABL1	YML104C	0.0441989	-1.43807
ABL1	YEL025C	0.0110497	-1.43895
ABL1	YPL223C	0.0220994	-1.43901
ABL1	YBR229C	0.839779	-1.43994
ABL1	YAL005C	0.132597	-1.44197
ABL1	YHR043C	0.00552486	-1.44555
ABL1	YDR313C	0.00552486	-1.44604
ABL1	YPL103C	0.0110497	-1.4468
ABL1	YJR092W	1.23757	-1.45014
ABL1	YDR035W	1.0663	-1.45063
ABL1	YLR037C	0.0110497	-1.45116
ABL1	YOR112W	0.0110497	-1.45257
ABL1	YCL027W	0.0110497	-1.4546
ABL1	YER141W	0.0276243	-1.45477
ABL1	YNL281W	0.0110497	-1.4554
ABL1	YBR264C	0.0276243	-1.45708
ABL1	YNL057W	0.607735	-1.45881
ABL1	YIL124W	0.038674	-1.46199
ABL1	YDR131C	0.00552486	-1.46427
ABL1	YDL240W	0.40884	-1.4643
ABL1	YOR223W	0.0220994	-1.46662
ABL1	YLR047C	0.0110497	-1.46846
ABL1	YLR207W	0.00552486	-1.46878
ABL1	YMR177W	0.0497238	-1.46892
ABL1	YEL040W	0.00552486	-1.47035
ABL1	YHR171W	0.00552486	-1.47285
ABL1	YMR099C	0.0110497	-1.47297
ABL1	YLL061W	0.0220994	-1.47879
ABL1	YJR056C	0.00552486	-1.47931
ABL1	YOR016C	0.0883978	-1.47983
ABL1	YOR382W	0.154696	-1.4801
ABL1	YBR261C	0.0220994	-1.48161
ABL1	YLR001C	0.0497238	-1.4828
ABL1	YLR203C	0.00552486	-1.48326
ABL1	YJL079C	0.0220994	-1.48445
ABL1	YML107C	0.116022	-1.48536
ABL1	YHR086W	0.121547	-1.48548
ABL1	YML080W	0.0441989	-1.48754
ABL1	YAR040C	0.00552486	-1.48767
ABL1	YIL155C	0.0110497	-1.48796
ABL1	YCL075W	1.43094	-1.48878
ABL1	YER121W	0.00552486	-1.48891
ABL1	YPL229W	0.0110497	-1.48899
ABL1	YER030W	0.0773481	-1.49025
ABL1	YBR018C	0.0441989	-1.49404
ABL1	YMR129W	0.00552486	-1.49862
ABL1	YOR255W	0.0220994	-1.49907
ABL1	YLR072W	0.0828729	-1.50051
ABL1	YIL070C	0.0552486	-1.50139
ABL1	YOR031W	0.0441989	-1.50219
ABL1	YLR119W	0.0110497	-1.50248
ABL1	YBR225W	0.0110497	-1.50315
ABL1	YCR021C	0.0331492	-1.50357
ABL1	YBR120C	0.0110497	-1.50406
ABL1	YCL038C	0.0276243	-1.5074
ABL1	YDR010C	0.662983	-1.50754
ABL1	YJL100W	1.10497	-1.50776
ABL1	YHL003C	0.0165746	-1.50928
ABL1	YBR128C	0.00552486	-1.50931
ABL1	YMR265C	0.0718232	-1.51027
ABL1	YHR093W	0.0220994	-1.51176
ABL1	YJL105W	0.00552486	-1.51449
ABL1	YIL071C	0.917127	-1.51685
ABL1	YOL032W	0.00552486	-1.51746
ABL1	YNL095C	0.585635	-1.5176
ABL1	YPL198W	0.0828729	-1.51786
ABL1	YBL055C	0.0276243	-1.51787
ABL1	YHR097C	0.0110497	-1.52023
ABL1	YBL078C	0.00552486	-1.52032
ABL1	YBR204C	0.00552486	-1.52089
ABL1	YIL006W	0.767956	-1.52174
ABL1	YMR034C	0.0607735	-1.52186
ABL1	YJL101C	0.0110497	-1.52343
ABL1	YJR062C	0.038674	-1.52435
ABL1	YEL059W	0.0110497	-1.52799
ABL1	YMR157C	0.0607735	-1.52869
ABL1	YBR105C	0.0165746	-1.52905
ABL1	YIL162W	0.861878	-1.53069
ABL1	YML090W	0.0110497	-1.53084
ABL1	YER075C	0.00552486	-1.53155
ABL1	YMR280C	0.425414	-1.53362
ABL1	YDR099W	0.0552486	-1.53432
ABL1	YBL054W	0.00552486	-1.53595
ABL1	YNL108C	0.0441989	-1.53791
ABL1	YMR304C-A	0.502762	-1.54042
ABL1	YMR238W	0.00552486	-1.5424
ABL1	YDL222C	2.20442	-1.54384
ABL1	YHR158C	0.00552486	-1.54465
ABL1	YJR147W	0.0165746	-1.54589
ABL1	YHR049C-A	0.0110497	-1.54716
ABL1	YLR080W	0.0110497	-1.54903
ABL1	YOR030W	0.00552486	-1.55162
ABL1	YCL006C	1.53591	-1.55479
ABL1	YMR184W	0.0110497	-1.55887
ABL1	YNL104C	0.00552486	-1.56278
ABL1	YDR036C	0.0607735	-1.57009
ABL1	YBL096C	0.0165746	-1.57296
ABL1	YPL135W	0.038674	-1.57463
ABL1	YPL230W	0.00552486	-1.57529
ABL1	YLR077W	0.0165746	-1.57626
ABL1	YOR079C	0.0497238	-1.58041
ABL1	YBR024W	0.0441989	-1.58227
ABL1	YHR049W	0.00552486	-1.58261
ABL1	YER065C	0.00552486	-1.5829
ABL1	YHL040C	0.00552486	-1.58564
ABL1	YJL119C	1.25967	-1.58654
ABL1	YOR273C	0.0441989	-1.58686
ABL1	YHR009C	0.0110497	-1.58694
ABL1	YJL043W	0.00552486	-1.58821
ABL1	YML110C	0.00552486	-1.58847
ABL1	YPL155C	0.0497238	-1.59094
ABL1	YOR342C	0.0994475	-1.59317
ABL1	YLR107W	0.0110497	-1.59799
ABL1	YJR051W	0.917127	-1.59832
ABL1	YJR037W	0.0441989	-1.59839
ABL1	YHR127W	0.475138	-1.60142
ABL1	YER067C-A	0.0110497	-1.6049
ABL1	YOR003W	0.038674	-1.60567
ABL1	YLR205C	0.0110497	-1.60625
ABL1	YDL225W	0.00552486	-1.60803
ABL1	YPL176C	0.00552486	-1.6093
ABL1	YER134C	0.00552486	-1.60978
ABL1	YDR229W	0.00552486	-1.6122
ABL1	YJL106W	1.40331	-1.61313
ABL1	YHR109W	0.00552486	-1.61412
ABL1	YLR084C	0.00552486	-1.61694
ABL1	YLL053C	0.662983	-1.61914
ABL1	YDR011W	0.0110497	-1.62292
ABL1	YBR238C	0.00552486	-1.62342
ABL1	YOR275C	0.0110497	-1.62358
ABL1	YER046W	0.966851	-1.62502
ABL1	YLL005C	0.0110497	-1.6259
ABL1	YML095C	0.0497238	-1.62646
ABL1	YBR260C	0.0110497	-1.62822
ABL1	YMR166C	0.0220994	-1.62823
ABL1	YML100W	0.00552486	-1.62926
ABL1	YDR006C	0.640884	-1.62927
ABL1	YOR304W	0.0718232	-1.62966
ABL1	YIL146C	0.0883978	-1.63149
ABL1	YJL071W	0.0110497	-1.63281
ABL1	YHR177W	0.00552486	-1.63325
ABL1	YIL089W	1.21547	-1.6358
ABL1	YDL197C	0.0276243	-1.63632
ABL1	YBL063W	0.0220994	-1.63746
ABL1	YML111W	0.00552486	-1.63797
ABL1	YDR135C	0.0497238	-1.63804
ABL1	YJR110W	0.00552486	-1.63856
ABL1	YMR164C	0.00552486	-1.64096
ABL1	YMR173W-A	0.0441989	-1.64424
ABL1	YHR037W	0.00552486	-1.64443
ABL1	YJL122W	0.867403	-1.64969
ABL1	YMR196W	0.00552486	-1.65445
ABL1	YNL275W	0.00552486	-1.65473
ABL1	YMR172C-A	0.00552486	-1.65496
ABL1	YPL149W	0.038674	-1.65617
ABL1	YBR071W	0.0718232	-1.65756
ABL1	YDL224C	0.0441989	-1.65762
ABL1	YMR221C	0.00552486	-1.65819
ABL1	YBR223C	0.0165746	-1.65974
ABL1	YNL339C	0.453039	-1.66057
ABL1	YJL110C	0.00552486	-1.66141
ABL1	YML005W	0.00552486	-1.66224
ABL1	YOR345C	0.629834	-1.66249
ABL1	YMR120C	0.00552486	-1.66368
ABL1	YMR233W	0.0331492	-1.66397
ABL1	YPL164C	0.0110497	-1.66583
ABL1	YBR241C	0.0110497	-1.66744
ABL1	YJL066C	0.0165746	-1.66764
ABL1	YHR016C	0.0165746	-1.67377
ABL1	YDL138W	1.35359	-1.67537
ABL1	YLR050C	0.0110497	-1.6755
ABL1	YJR010W	0.0276243	-1.67668
ABL1	YOL045W	0.0110497	-1.67898
ABL1	YDR001C	0.0165746	-1.67902
ABL1	YMR273C	0.00552486	-1.68086
ABL1	YJL083W	1.1105	-1.68297
ABL1	YIR002C	0.00552486	-1.68365
ABL1	YOR094W	0.00552486	-1.68386
ABL1	YML122C	0.0276243	-1.6855
ABL1	YOR114W	0.038674	-1.68602
ABL1	YNL078W	0.950276	-1.68713
ABL1	YML007W	0.00552486	-1.68765
ABL1	YHL034C	0.0165746	-1.68832
ABL1	YEL048C	0.0165746	-1.68837
ABL1	YOL035C	0.00552486	-1.68841
ABL1	YNL145W	0.0331492	-1.68857
ABL1	YLR070C	0.0331492	-1.69112
ABL1	YOR005C	0.0331492	-1.69121
ABL1	YMR019W	0.00552486	-1.69268
ABL1	YMR167W	0.0110497	-1.69609
ABL1	YIL108W	0.0165746	-1.6974
ABL1	YBR148W	0.0331492	-1.69788
ABL1	YDL124W	0.0165746	-1.69992
ABL1	YML003W	0.0497238	-1.70262
ABL1	YNL125C	0.0220994	-1.70461
ABL1	YJR058C	0.0331492	-1.70635
ABL1	YLL030C	0.0110497	-1.70825
ABL1	YBR184W	0.0165746	-1.70919
ABL1	YPL134C	0.0165746	-1.70935
ABL1	YHL026C	0.0331492	-1.71015
ABL1	YNL202W	0.0220994	-1.71166
ABL1	YEL028W	0.00552486	-1.71203
ABL1	YDL134C-A	0.0441989	-1.71506
ABL1	YDR239C	0.0110497	-1.72186
ABL1	YJR116W	0.0110497	-1.72551
ABL1	YMR264W	0.0331492	-1.72655
ABL1	YBR066C	0.0607735	-1.72684
ABL1	YPR001W	0.0165746	-1.72853
ABL1	YML037C	0.0607735	-1.73246
ABL1	YPL167C	0.0718232	-1.73539
ABL1	YAR047C	0.0276243	-1.73737
ABL1	YMR110C	0.00552486	-1.74169
ABL1	YML009c	0.0110497	-1.7427
ABL1	YJR150C	0.0220994	-1.74319
ABL1	YML042W	0.0110497	-1.74714
ABL1	YHR001W-A	0.0331492	-1.74842
ABL1	YOR015W	0.0165746	-1.74949
ABL1	YEL012W	0.00552486	-1.7508
ABL1	YMR182C	0.00552486	-1.75582
ABL1	YNL255C	0.0607735	-1.76199
ABL1	YJR149W	0.038674	-1.76203
ABL1	YPL096W	0.0165746	-1.76804
ABL1	YNL294C	0.513812	-1.76945
ABL1	YOR062C	0.00552486	-1.7732
ABL1	YPL021W	0.0110497	-1.77372
ABL1	YNL335W	0.00552486	-1.77542
ABL1	YBR220C	0.0165746	-1.77858
ABL1	YBR046C	0.0165746	-1.78436
ABL1	YOR082C	0.0165746	-1.7845
ABL1	YOL014W	0.0276243	-1.78575
ABL1	YDR171W	0.0276243	-1.78942
ABL1	YLR003C	0.00552486	-1.7911
ABL1	YJR091C	0.453039	-1.79174
ABL1	YHL002W	1.43646	-1.79253
ABL1	YJL070C	0.298343	-1.79787
ABL1	YDL211C	0.0552486	-1.80028
ABL1	YLR041W	0.00552486	-1.8022
ABL1	YNL087W	0.0220994	-1.81167
ABL1	YJL094C	0.0220994	-1.81523
ABL1	YJR039W	0.0110497	-1.81647
ABL1	YIL086C	0.00552486	-1.81831
ABL1	YOR156C	0.0441989	-1.822
ABL1	YJL038C	0.00552486	-1.82705
ABL1	YNL065W	0.0276243	-1.83142
ABL1	YER098W	0.0110497	-1.83301
ABL1	YJL093C	0.0939227	-1.83354
ABL1	YJR031C	0.0165746	-1.83445
ABL1	YOL085C	0.0497238	-1.83537
ABL1	YMR192W	0.0607735	-1.84081
ABL1	YDL219W	0.0276243	-1.84443
ABL1	YJR128W	0.0276243	-1.84686
ABL1	YBL098W	0.0110497	-1.84733
ABL1	YPL121C	0.0110497	-1.84842
ABL1	YNL141W	0.00552486	-1.8509
ABL1	YMR104C	0.038674	-1.85567
ABL1	YJR153W	0.0276243	-1.8575
ABL1	YJR078W	0.513812	-1.85813
ABL1	YHL014C	0.00552486	-1.86289
ABL1	YOR029W	0.0165746	-1.86477
ABL1	YMR155W	0.0497238	-1.86558
ABL1	YDR043C	0.0276243	-1.86741
ABL1	YML066C	0.331492	-1.87093
ABL1	YMR176W	0.0165746	-1.87293
ABL1	YMR158W-A	0.0718232	-1.87496
ABL1	YLL062C	0.0110497	-1.87649
ABL1	YER001W	0.0110497	-1.8766
ABL1	YDL171C	1.12707	-1.87808
ABL1	YMR169c	0.0331492	-1.88213
ABL1	YLL052C	0.0220994	-1.88804
ABL1	YMR210W	0.0441989	-1.90098
ABL1	YDL204W	0.0276243	-1.90821
ABL1	YMR109W	0.0220994	-1.90885
ABL1	YLL012W	0.0276243	-1.91212
ABL1	YOR337W	0.0110497	-1.91528
ABL1	YDL184C	1.30387	-1.92257
ABL1	YML002W	0.0220994	-1.92477
ABL1	YAR042W	0.0110497	-1.92567
ABL1	YIL165C	0.0441989	-1.92718
ABL1	YDL157C	0.00552486	-1.93084
ABL1	YDL230W	0.0220994	-1.93332
ABL1	YPL185W	0.00552486	-1.93334
ABL1	YBR169C	0.0165746	-1.93445
ABL1	YDR031W	0.0220994	-1.94368
ABL1	YIL141W	0.00552486	-1.9497
ABL1	YIL059C	0.0110497	-1.95039
ABL1	YDL182W	0.729282	-1.95549
ABL1	YBR051W	0.0165746	-1.95629
ABL1	YJL211C	0.0110497	-1.9603
ABL1	YNL105W	0.0331492	-1.96114
ABL1	YML123C	0.0110497	-1.96683
ABL1	YCR018C	0.0165746	-1.9672
ABL1	YJL068C	0.00552486	-1.97534
ABL1	YPL264C	0.0110497	-1.98434
ABL1	YNL101W	0.0220994	-1.9995
ABL1	YPL165C	0.0883978	-2.00074
ABL1	YDL206W	0.0220994	-2.0011
ABL1	YPL141C	0.0331492	-2.00209
ABL1	YPL023C	0.0662983	-2.00222
ABL1	YLR034C	0.0165746	-2.01378
ABL1	YDL149W	0.0220994	-2.01521
ABL1	YHL039W	0.00552486	-2.02278
ABL1	YJL098W	0.00552486	-2.02929
ABL1	YMR145C	1.09945	-2.03011
ABL1	YIL170W	0.00552486	-2.03666
ABL1	YMR118C	0.00552486	-2.03848
ABL1	YEL011W	0.0165746	-2.04063
ABL1	YJL051W	0.983425	-2.05282
ABL1	YIR013C	0.0331492	-2.05858
ABL1	YNL074C	0.0441989	-2.06429
ABL1	YDL215C	0.0110497	-2.06759
ABL1	YMR283C	0.0607735	-2.06808
ABL1	YER160C	0.0441989	-2.07064
ABL1	YBL102W	0.0276243	-2.08082
ABL1	YDR143C	0.0165746	-2.08369
ABL1	YML036W	0.0220994	-2.10063
ABL1	YMR247C	0.0331492	-2.10425
ABL1	YDL177C	1.32597	-2.13846
ABL1	YML074C	0.0441989	-2.13966
ABL1	YDL180W	1.16575	-2.14302
ABL1	YJR107W	1.23204	-2.14844
ABL1	YDL243C	0.0110497	-2.15666
ABL1	YDR026C	0.226519	-2.16397
ABL1	YML031W	0.0165746	-2.17722
ABL1	YIL156W	0.0220994	-2.19121
ABL1	YIL010W	0.767956	-2.1942
ABL1	YIL152W	0.0165746	-2.1963
ABL1	YIL092W	0.0110497	-2.19827
ABL1	YJL065C	0.00552486	-2.20804
ABL1	YOR328W	0.038674	-2.21047
ABL1	YDL137W	0.0110497	-2.22291
ABL1	YDL231C	0.0718232	-2.25637
ABL1	YIL074C	0.00552486	-2.28248
ABL1	YDL179W	0.61326	-2.28454
ABL1	YHR185C	0.0331492	-2.28825
ABL1	YLL060C	0.0110497	-2.30597
ABL1	YJL058C	0.0331492	-2.30667
ABL1	YDR033W	0.0331492	-2.31261
ABL1	YMR180C	0.0552486	-2.32351
ABL1	YJL048C	0.0331492	-2.33368
ABL1	YJR131W	0.0165746	-2.36321
ABL1	YIR007W	0.0552486	-2.39263
ABL1	YER063W	0.038674	-2.44295
ABL1	YPL036W	0.0718232	-2.62275
ABL1	YDL156W	0.574586	-2.64625
ACVR1	YNL211C	0.318395	-0.000949721
ACVR1	YJL132W	2.29075	-0.00221059
ACVR1	YOR193W	0.981953	-0.00290388
ACVR1	YJL116C	3.0797	-0.00300474
ACVR1	YBR258C	1.28908	-0.00312373
ACVR1	YLL032C	1.59057	-0.00338917
ACVR1	YDL125C	0.579028	-0.00455975
ACVR1	YJR010W	1.21441	-0.00456201
ACVR1	YHR162W	0.994632	-0.00462643
ACVR1	YBR158W	0.417013	-0.00476052
ACVR1	YBL048W	0.483228	-0.00491436
ACVR1	YBR069C	0.801623	-0.00554197
ACVR1	YJR137C	2.66691	-0.00571082
ACVR1	YJL099W	1.38347	-0.00645337
ACVR1	YJR019C	1.98504	-0.0066893
ACVR1	YPL201C	1.35107	-0.00743156
ACVR1	YOR061W	1.8991	-0.00814331
ACVR1	YML017W	2.26962	-0.00834775
ACVR1	YIL053W	0.407151	-0.00854402
ACVR1	YMR145C	2.25835	-0.0104036
ACVR1	YJL021C	1.03126	-0.0105112
ACVR1	YNL329C	1.52858	-0.0112324
ACVR1	YOL059W	1.05521	-0.0115766
ACVR1	YPL086C	0.115524	-0.0121697
ACVR1	YMR118C	2.42037	-0.0125862
ACVR1	YDR055W	0.842479	-0.0131381
ACVR1	YOR173W	0.229639	-0.0133241
ACVR1	YLR016C	1.41165	-0.0140497
ACVR1	YDR283C	0.0943915	-0.0142615
ACVR1	YLL039C	0.664967	-0.0153691
ACVR1	YJL169W	0.653696	-0.01611
ACVR1	YDL182W	5.68321	-0.017022
ACVR1	YOL075C	1.25527	-0.0172008
ACVR1	YBR186W	0.800214	-0.017604
ACVR1	YLR020C	1.3722	-0.0181873
ACVR1	YML057W	1.12002	-0.0181879
ACVR1	YPL133C	3.15155	-0.0185613
ACVR1	YBR022W	1.66805	-0.0190658
ACVR1	YOL036W	1.05521	-0.0202895
ACVR1	YEL038W	1.15242	-0.0206268
ACVR1	YHR086W	1.65115	-0.0210192
ACVR1	YDR029W	3.34033	-0.0214044
ACVR1	YLR136C	0.542399	-0.022248
ACVR1	YOR289W	1.9625	-0.0226373
ACVR1	YBR042C	0.752314	-0.0230657
ACVR1	YML128C	0.687508	-0.0241087
ACVR1	YBR157C	0.767811	-0.0241503
ACVR1	YDR042C	2.31611	-0.0255184
ACVR1	YER124C	0.922782	-0.0260956
ACVR1	YDL107W	0.225412	-0.0262378
ACVR1	YAL061W	1.15242	-0.0265871
ACVR1	YHR045W	1.82866	-0.0265912
ACVR1	YBR207W	1.14819	-0.0267574
ACVR1	YLR072W	1.41446	-0.0279866
ACVR1	YLR152C	1.01295	-0.0288967
ACVR1	YBL057C	0.81712	-0.0292584
ACVR1	YEL037C	0.695961	-0.0301731
ACVR1	YHR176W	0.26486	-0.0305181
ACVR1	YNL231C	0.955185	-0.0308524
ACVR1	YHR139C	0.801623	-0.0310638
ACVR1	YJL079C	2.20622	-0.0311449
ACVR1	YCR021C	1.27358	-0.0312322
ACVR1	YNL076W	2.03012	-0.0314687
ACVR1	YOR092W	0.860794	-0.0316915
ACVR1	YML011C	2.74862	-0.0317559
ACVR1	YOR230W	0.602978	-0.0318632
ACVR1	YJL157C	1.12424	-0.0324163
ACVR1	YPR001W	1.14397	-0.0328713
ACVR1	YHR163W	0.487454	-0.0331916
ACVR1	YLL063C	0.979135	-0.0332989
ACVR1	YEL041W	2.11465	-0.0338668
ACVR1	YML097C	0.352207	-0.0340956
ACVR1	YMR215W	0.903059	-0.034765
ACVR1	YDR097C	1.67791	-0.0349474
ACVR1	YIL107C	0.683281	-0.0350063
ACVR1	YBR223C	0.784717	-0.0352266
ACVR1	YER053C	0.959412	-0.0373096
ACVR1	YLL010C	1.47645	-0.0380914
ACVR1	YCL051W	0.586072	-0.0391131
ACVR1	YHR091C	0.100027	-0.0402503
ACVR1	YPL162C	0.798805	-0.0402708
ACVR1	YNL200C	1.77512	-0.0406385
ACVR1	YLR070C	1.7878	-0.0410223
ACVR1	YDR098C	1.01436	-0.0415355
ACVR1	YLR050C	2.31611	-0.0422192
ACVR1	YPL136W	0.845297	-0.0423247
ACVR1	YMR178W	1.48631	-0.0428479
ACVR1	YPL116W	1.17496	-0.0430713
ACVR1	YOR013W	1.45109	-0.0437542
ACVR1	YIL096C	0.911512	-0.044049
ACVR1	YBL052C	0.381792	-0.0450046
ACVR1	YIL165C	1.89346	-0.0488914
ACVR1	YBL080C	0.714276	-0.0511242
ACVR1	YMR161W	3.42627	-0.0515166
ACVR1	YPL041C	0.40856	-0.0517778
ACVR1	YAL009W	0.314169	-0.0519328
ACVR1	YMR123W	0.0943915	-0.0523788
ACVR1	YHR132C	1.21159	-0.0526933
ACVR1	YJL162C	0.171877	-0.0527171
ACVR1	YJL147C	0.94955	-0.0538944
ACVR1	YNL266W	1.49758	-0.0544855
ACVR1	YBR138C	0.896014	-0.0547566
ACVR1	YHR125W	0.691734	-0.0562486
ACVR1	YLR036C	1.18623	-0.0564047
ACVR1	YAL005C	1.91741	-0.0564746
ACVR1	YBR141C	1.2609	-0.0564785
ACVR1	YHR181W	1.35529	-0.0569619
ACVR1	YER087C-A	1.11016	-0.0573797
ACVR1	YDL226C	0.753723	-0.0576483
ACVR1	YHR206W	0.842479	-0.0579548
ACVR1	YER160C	1.61452	-0.058411
ACVR1	YMR316W	1.55253	-0.0586112
ACVR1	YML038C	1.74554	-0.0587987
ACVR1	YOR114W	0.896014	-0.0594374
ACVR1	YER093C-A	1.5793	-0.0594806
ACVR1	YHR130C	0.977726	-0.0597415
ACVR1	YOR050C	1.66383	-0.0597502
ACVR1	YER034W	0.928417	-0.0600958
ACVR1	YNL212W	0.526902	-0.0602972
ACVR1	YNL154C	0.690326	-0.0604649
ACVR1	YDR032C	1.4835	-0.0605575
ACVR1	YNL087W	3.25017	-0.0614921
ACVR1	YER165C-A	0.49309	-0.061529
ACVR1	YJR066W	1.06226	-0.0622088
ACVR1	YCL033C	0.690326	-0.0626426
ACVR1	YJR115W	2.70918	-0.0631088
ACVR1	YBR255W	0.990406	-0.0635899
ACVR1	YDL010W	0.333892	-0.0640249
ACVR1	YOR156C	3.00503	-0.0649025
ACVR1	YJL208C	0.30008	-0.0654808
ACVR1	YBL086C	1.25527	-0.0664943
ACVR1	YBR057C	1.30739	-0.0675283
ACVR1	YHL045W	1.26231	-0.0675707
ACVR1	YMR114C	1.52435	-0.0680232
ACVR1	YDR151C	0.845297	-0.0685074
ACVR1	YIL155C	1.42855	-0.068798
ACVR1	YDR253C	0.463504	-0.0694626
ACVR1	YBR065C	1.53703	-0.0698325
ACVR1	YMR040W	1.52717	-0.0699948
ACVR1	YJR053W	1.17496	-0.0706584
ACVR1	YPL084W	0.301489	-0.0718992
ACVR1	YLR220W	0.810076	-0.072006
ACVR1	YDL100C	0.339527	-0.0722659
ACVR1	YDR015C	1.50463	-0.0735435
ACVR1	YIL162W	2.19354	-0.0738979
ACVR1	YLR199C	0.446598	-0.0741319
ACVR1	YBR208C	0.90165	-0.0750359
ACVR1	YDL070W	0.463504	-0.0750736
ACVR1	YPL253C	0.157789	-0.0756049
ACVR1	YBL053W	1.23554	-0.0762062
ACVR1	YIL157C	1.25949	-0.0767008
ACVR1	YAL015C	1.3891	-0.076987
ACVR1	YDL225W	1.37924	-0.0771137
ACVR1	YBR063C	1.27922	-0.0781837
ACVR1	YEL010W	1.1806	-0.0798596
ACVR1	YEL031W	0.188783	-0.0801555
ACVR1	YAL022C	0.91292	-0.0801954
ACVR1	YJL130C	0.646652	-0.080737
ACVR1	YOR315W	0.753723	-0.0811318
ACVR1	YJL204C	0.246545	-0.0834987
ACVR1	YER096W	1.85402	-0.0838246
ACVR1	YAL019W	0.686099	-0.0841359
ACVR1	YBR092C	0.928417	-0.0843143
ACVR1	YIL168W	2.98953	-0.0845356
ACVR1	YMR159C	1.95404	-0.0846289
ACVR1	YDR048C	0.545216	-0.0866601
ACVR1	YOR226C	0.443781	-0.0869474
ACVR1	YJR121W	0.0394472	-0.0871681
ACVR1	YLR144C	0.608614	-0.0877513
ACVR1	YBL066C	1.4525	-0.0881634
ACVR1	YOR089C	0.433919	-0.0893335
ACVR1	YEL068C	2.18368	-0.0894067
ACVR1	YLR218C	0.50436	-0.0897844
ACVR1	YIL156W	1.92164	-0.0899366
ACVR1	YBL096C	1.36938	-0.0904538
ACVR1	YNL146W	2.34429	-0.0908718
ACVR1	YPL229W	1.19046	-0.0908874
ACVR1	YBR164C	0.762176	-0.0909931
ACVR1	YHR159W	0.48041	-0.0912433
ACVR1	YPL206C	0.791761	-0.0915283
ACVR1	YIL140W	1.73004	-0.0925205
ACVR1	YEL009C	0.805849	-0.0926744
ACVR1	YOR107W	1.06507	-0.0939233
ACVR1	YNL316C	1.66383	-0.0945465
ACVR1	YDL077C	0.446598	-0.0952438
ACVR1	YCR022C	0.560713	-0.0958919
ACVR1	YOR238W	0.843888	-0.0959884
ACVR1	YPL264C	1.04958	-0.0971385
ACVR1	YEL017C-A	0.712867	-0.0977479
ACVR1	YBL104C	0.803032	-0.0979098
ACVR1	YPL230W	1.10593	-0.0982974
ACVR1	YJL155C	0.417013	-0.0985459
ACVR1	YLR081W	1.24259	-0.0988223
ACVR1	YDR011W	2.12169	-0.0991985
ACVR1	YPL220W	0.705823	-0.0992214
ACVR1	YHL032C	0.736817	-0.0992628
ACVR1	YIL005W	0.394472	-0.0995755
ACVR1	YNL335W	1.56803	-0.10107
ACVR1	YCL046W	0.483228	-0.101654
ACVR1	YMR187C	1.91882	-0.101942
ACVR1	YNL253W	1.02281	-0.102316
ACVR1	YDR198C	0.629746	-0.10284
ACVR1	YHR139C-A	1.07071	-0.103701
ACVR1	YPL107W	1.34966	-0.104225
ACVR1	YOL043C	0.869247	-0.104713
ACVR1	YLL041C	0.338119	-0.104988
ACVR1	YHL038C	0.573393	-0.10536
ACVR1	YMR183C	1.94418	-0.105651
ACVR1	YOR359W	1.28485	-0.105975
ACVR1	YBL091C	0.922782	-0.107739
ACVR1	YJR040W	0.905876	-0.108233
ACVR1	YBR067C	1.0369	-0.108289
ACVR1	YJL070C	2.59224	-0.109633
ACVR1	YLR004C	1.44687	-0.110032
ACVR1	YBR107C	0.357842	-0.11034
ACVR1	YPL259C	1.01154	-0.110652
ACVR1	YHR009C	1.73145	-0.111388
ACVR1	YER031C	0.735408	-0.112416
ACVR1	YDR010C	2.65	-0.11242
ACVR1	YMR223W	1.1806	-0.112639
ACVR1	YDR066C	1.69482	-0.112942
ACVR1	YER166W	0.319804	-0.113374
ACVR1	YJL005W	0.311351	-0.113435
ACVR1	YPL098C	0.301489	-0.113627
ACVR1	YIL130W	1.82021	-0.113837
ACVR1	YDR194C	0.245136	-0.114396
ACVR1	YAL036C	1.1017	-0.115413
ACVR1	YBL085W	1.02985	-0.115557
ACVR1	YOR271C	1.17355	-0.117166
ACVR1	YPL149W	1.48068	-0.11816
ACVR1	YDR319C	0.501543	-0.118328
ACVR1	YML006C	0.764993	-0.118685
ACVR1	YLL053C	2.51898	-0.118912
ACVR1	YDL050C	0.270495	-0.119246
ACVR1	YIR007W	3.15014	-0.119362
ACVR1	YJL133W	0.910103	-0.119372
ACVR1	YBR182C	0.448007	-0.119782
ACVR1	YER140W	1.48913	-0.120054
ACVR1	YLL054C	2.29921	-0.120394
ACVR1	YNL318C	1.468	-0.12051
ACVR1	YBR235W	0.762176	-0.120602
ACVR1	YER138C-A	0.583255	-0.122093
ACVR1	YML026C	0.101436	-0.122231
ACVR1	YLR420W	0.590299	-0.122807
ACVR1	YCL047C	0.417013	-0.123482
ACVR1	YHR193C	0.238092	-0.124031
ACVR1	YPL060W	0.677646	-0.124097
ACVR1	YDR080W	0.770629	-0.12471
ACVR1	YER157W	0.993224	-0.125249
ACVR1	YOR220W	0.440963	-0.125554
ACVR1	YDL122W	0.917147	-0.12573
ACVR1	YOR043W	2.22031	-0.125734
ACVR1	YPL216W	0.388836	-0.125941
ACVR1	YBR046C	2.26539	-0.125949
ACVR1	YER059W	2.10902	-0.128129
ACVR1	YHL024W	1.26654	-0.128358
ACVR1	YPL257W	0.397289	-0.128613
ACVR1	YHR087W	0.749496	-0.129071
ACVR1	YOL031C	1.27358	-0.129117
ACVR1	YDR144C	0.934053	-0.129172
ACVR1	YMR144W	1.38488	-0.13005
ACVR1	YDR220C	0.535355	-0.130492
ACVR1	YJL123C	1.49899	-0.13118
ACVR1	YDL174C	5.56064	-0.132549
ACVR1	YHR093W	1.07634	-0.133941
ACVR1	YER056C	1.08761	-0.134045
ACVR1	YDL067C	0.395881	-0.134152
ACVR1	YIL123W	0.476184	-0.134493
ACVR1	YLR180W	0.857976	-0.134584
ACVR1	YDR312W	0.494499	-0.135425
ACVR1	YLR207W	0.993224	-0.136783
ACVR1	YDR109C	1.0059	-0.137647
ACVR1	YAL062W	1.34825	-0.137753
ACVR1	YMR320W	2.93177	-0.137755
ACVR1	YIL173W	2.84301	-0.137854
ACVR1	YIL084C	0.822755	-0.138208
ACVR1	YDR313C	0.532537	-0.138266
ACVR1	YCR016W	0.453643	-0.139029
ACVR1	YPL202C	0.326848	-0.139254
ACVR1	YBL069W	1.17214	-0.140075
ACVR1	YJR130C	1.28203	-0.140717
ACVR1	YIL166C	0.848114	-0.141063
ACVR1	YER007C-A	0.848114	-0.141116
ACVR1	YOR223W	0.711458	-0.141312
ACVR1	YOR263C	0.75654	-0.141329
ACVR1	YPL089C	0.529719	-0.141411
ACVR1	YJR070C	0.366295	-0.142139
ACVR1	YER084W	0.333892	-0.142199
ACVR1	YBL042C	0.32403	-0.142315
ACVR1	YLR110C	0.834026	-0.142824
ACVR1	YDR099W	1.13974	-0.143112
ACVR1	YML016C	0.369113	-0.144563
ACVR1	YIL164C	1.32289	-0.144598
ACVR1	YIL088C	2.0583	-0.144627
ACVR1	YIL154C	0.193009	-0.144855
ACVR1	YMR171C	1.53844	-0.145069
ACVR1	YOL053W	0.815711	-0.145291
ACVR1	YDR279W	0.187374	-0.145966
ACVR1	YDL039C	1.43137	-0.146066
ACVR1	YOR384W	1.69059	-0.146622
ACVR1	YHR161C	0.917147	-0.149626
ACVR1	YJL042W	2.83315	-0.149648
ACVR1	YLL049W	0.355025	-0.150359
ACVR1	YLL016W	0.972091	-0.152632
ACVR1	YIL043C	0.170468	-0.152822
ACVR1	YNL095C	2.07239	-0.153467
ACVR1	YML032C-A	0.767811	-0.153504
ACVR1	YLL046C	3.42627	-0.153544
ACVR1	YBR184W	0.631155	-0.153843
ACVR1	YPL150W	0.764993	-0.154435
ACVR1	YJR015W	1.41869	-0.154813
ACVR1	YBR139W	1.31866	-0.154989
ACVR1	YDR317W	0.31276	-0.15555
ACVR1	YDR104C	1.09325	-0.155609
ACVR1	YLR170C	0.545216	-0.156794
ACVR1	YCL045C	0.75654	-0.156974
ACVR1	YNL275W	1.44264	-0.15749
ACVR1	YOR296W	1.36656	-0.157528
ACVR1	YBL060W	0.515631	-0.158298
ACVR1	YOL037C	0.570575	-0.158524
ACVR1	YLR124W	1.1172	-0.158553
ACVR1	YHR031C	0.225412	-0.158569
ACVR1	YLR134W	0.409969	-0.158739
ACVR1	YER028C	1.35247	-0.159548
ACVR1	YOR385W	1.72863	-0.159873
ACVR1	YCR018C	1.91741	-0.160009
ACVR1	YHR167W	0.395881	-0.160783
ACVR1	YDL027C	0.440963	-0.160995
ACVR1	YMR254C	1.18623	-0.161219
ACVR1	YPL108W	0.466322	-0.16122
ACVR1	YOR165W	0.428284	-0.161955
ACVR1	YOR330C	0.225412	-0.162419
ACVR1	YNL214W	1.18342	-0.163707
ACVR1	YLR031W	0.980544	-0.164428
ACVR1	YOR175C	0.322622	-0.164696
ACVR1	YPL112C	0.85375	-0.164778
ACVR1	YHR126C	1.12565	-0.164822
ACVR1	YDR149C	0.0972091	-0.165056
ACVR1	YOR229W	0.602978	-0.16578
ACVR1	YBR264C	1.11016	-0.165955
ACVR1	YNL191W	0.632564	-0.166813
ACVR1	YDR276C	0.197236	-0.167568
ACVR1	YJR147W	0.831208	-0.168016
ACVR1	YMR262W	1.91882	-0.168389
ACVR1	YHL047C	1.25245	-0.168747
ACVR1	YPR002W	0.67342	-0.168932
ACVR1	YER067C-A	1.3567	-0.170323
ACVR1	YJL128C	0.245136	-0.170517
ACVR1	YJL206C-A	0.524084	-0.170949
ACVR1	YJL083W	3.23608	-0.171467
ACVR1	YPL139C	0.511404	-0.171484
ACVR1	YAR035W	0.712867	-0.171533
ACVR1	YBL088C	0.63679	-0.17175
ACVR1	YLR038C	0.835435	-0.172236
ACVR1	YIL024C	0.401516	-0.172624
ACVR1	YDL094C	0.505769	-0.172816
ACVR1	YBL009W	0.555078	-0.173737
ACVR1	YCL048W	0.350798	-0.173882
ACVR1	YLL028W	1.45814	-0.173981
ACVR1	YER128W	0.996041	-0.174678
ACVR1	YHR156C	0.591708	-0.174702
ACVR1	YAL017W	0.695961	-0.175129
ACVR1	YAL046C	0.38461	-0.175254
ACVR1	YMR099C	0.542399	-0.17532
ACVR1	YBR199W	0.934053	-0.175758
ACVR1	YJL158C	0.814302	-0.176051
ACVR1	YOL055C	0.68469	-0.176155
ACVR1	YDL074C	0.207098	-0.17656
ACVR1	YPL163C	0.9256	-0.176638
ACVR1	YOR072W	1.47363	-0.176719
ACVR1	YOR251C	0.126794	-0.177106
ACVR1	YBL010C	0.657923	-0.178399
ACVR1	YOR280C	1.12284	-0.178765
ACVR1	YHR082C	0.876291	-0.178803
ACVR1	YMR011W	0.643834	-0.179094
ACVR1	YAR018C	0.188783	-0.17913
ACVR1	YDL243C	2.34992	-0.179838
ACVR1	YDR251W	0.79317	-0.180793
ACVR1	YER056C-A	0.622702	-0.181115
ACVR1	YPL023C	1.19187	-0.181132
ACVR1	YLR058C	0.788944	-0.181248
ACVR1	YJR091C	2.30343	-0.181437
ACVR1	YMR174c	0.952368	-0.181611
ACVR1	YMR255W	1.18905	-0.181797
ACVR1	YDL131W	1.07916	-0.182631
ACVR1	YMR273C	1.2933	-0.182727
ACVR1	YPL187W	0.810076	-0.183118
ACVR1	YBL013W	0.666376	-0.183161
ACVR1	YLR096W	1.0848	-0.185322
ACVR1	YDL227C	4.11237	-0.185786
ACVR1	YLR083C	0.666376	-0.185928
ACVR1	YML111W	1.79766	-0.18614
ACVR1	YOR178C	0.471957	-0.187476
ACVR1	YHR198C	0.972091	-0.188325
ACVR1	YPL199C	1.02844	-0.188486
ACVR1	YPL168W	1.56662	-0.189081
ACVR1	YOR052C	1.49336	-0.189579
ACVR1	YPL092W	0.814302	-0.191582
ACVR1	YBL001C	0.269086	-0.191997
ACVR1	YOR195W	0.54099	-0.192591
ACVR1	YBL037W	0.470548	-0.193058
ACVR1	YHL017W	0.8777	-0.193886
ACVR1	YDR219C	0.621293	-0.194048
ACVR1	YDR020C	0.30008	-0.194295
ACVR1	YPL155C	1.0214	-0.195845
ACVR1	YER032W	0.494499	-0.196735
ACVR1	YNL183C	1.31021	-0.197444
ACVR1	YPL203W	1.22568	-0.198064
ACVR1	YDR231C	0.462095	-0.199017
ACVR1	YOR266W	0.150745	-0.199954
ACVR1	YDL135C	1.20173	-0.200322
ACVR1	YCR005C	0.767811	-0.200855
ACVR1	YBR225W	0.828391	-0.201231
ACVR1	YHL008C	1.11438	-0.202106
ACVR1	YHL020C	0.139474	-0.202332
ACVR1	YOR334W	2.6486	-0.202405
ACVR1	YER060W	1.73708	-0.203853
ACVR1	YJL207C	0.969273	-0.204231
ACVR1	YPL105C	0.855158	-0.204453
ACVR1	YOR115C	0.783308	-0.204737
ACVR1	YOL042W	0.62552	-0.204916
ACVR1	YDR152W	1.15524	-0.204934
ACVR1	YCL009C	0.425466	-0.204952
ACVR1	YLR042C	1.62579	-0.20591
ACVR1	YOR101W	0.594525	-0.206577
ACVR1	YMR133W	1.46377	-0.206871
ACVR1	YML029W	1.17496	-0.208067
ACVR1	YBL008W	0.135247	-0.20817
ACVR1	YHR140W	0.948141	-0.208894
ACVR1	YBL064C	0.958003	-0.209487
ACVR1	YIL146C	2.25694	-0.2095
ACVR1	YER057C	1.6286	-0.21174
ACVR1	YBR232C	1.58211	-0.211996
ACVR1	YJR106W	1.52717	-0.21234
ACVR1	YJR005W	0.959412	-0.212416
ACVR1	YNL135C	0.201462	-0.21242
ACVR1	YDL076C	0.355025	-0.212999
ACVR1	YER168C	0.439554	-0.213021
ACVR1	YNL071W	0.550852	-0.2138
ACVR1	YER079W	0.966456	-0.214081
ACVR1	YLL044W	0.149336	-0.214192
ACVR1	YMR284W	1.22004	-0.214928
ACVR1	YMR012W	1.4046	-0.215089
ACVR1	YLR200W	0.0605796	-0.215379
ACVR1	YER180C	0.352207	-0.216293
ACVR1	YNL141W	1.85261	-0.216504
ACVR1	YHR129C	0.253589	-0.216537
ACVR1	YPL245W	0.979135	-0.216674
ACVR1	YEL063C	1.06648	-0.216794
ACVR1	YOL048C	0.50436	-0.216865
ACVR1	YPL015C	1.12002	-0.216919
ACVR1	YHR015W	1.42714	-0.217037
ACVR1	YHR061C	0.690326	-0.218691
ACVR1	YOR007C	2.12029	-0.21872
ACVR1	YAL028W	1.12002	-0.21903
ACVR1	YMR148W	2.20059	-0.21914
ACVR1	YPL258C	1.25667	-0.219217
ACVR1	YML070W	1.1172	-0.219547
ACVR1	YHL036W	0.56494	-0.221635
ACVR1	YER085C	1.20314	-0.221888
ACVR1	YLL045C	0.0887561	-0.221998
ACVR1	YPL021W	1.01858	-0.222703
ACVR1	YBR090C-A	0.717093	-0.222773
ACVR1	YLL001W	0.197236	-0.22278
ACVR1	YOL016C	1.44687	-0.222931
ACVR1	YPL174C	0.278948	-0.223051
ACVR1	YMR306W	2.26258	-0.223288
ACVR1	YOR386W	0.333892	-0.223484
ACVR1	YBR239C	1.27922	-0.223855
ACVR1	YMR315W	1.91601	-0.223864
ACVR1	YOR009W	1.61874	-0.224585
ACVR1	YDR305C	0.353616	-0.224834
ACVR1	YPL127C	0.848114	-0.224927
ACVR1	YER167W	0.849523	-0.226208
ACVR1	YHR150W	0.505769	-0.226521
ACVR1	YJR061W	1.81598	-0.226599
ACVR1	YHL006C	0.767811	-0.226986
ACVR1	YMR158W-A	1.4046	-0.227996
ACVR1	YCR020C-A	0.242318	-0.228093
ACVR1	YIL029C	0.560713	-0.229115
ACVR1	YDL036C	0.941097	-0.229378
ACVR1	YNL077W	0.414195	-0.229951
ACVR1	YPL081W	0.526902	-0.230591
ACVR1	YJR075W	0.604387	-0.230698
ACVR1	YMR124W	0.75654	-0.230711
ACVR1	YDR222W	0.545216	-0.231415
ACVR1	YPL132W	0.670602	-0.231911
ACVR1	YMR313C	1.14397	-0.232455
ACVR1	YOL063C	0.657923	-0.233127
ACVR1	YNL323W	0.169059	-0.234958
ACVR1	YIL131C	1.0214	-0.236055
ACVR1	YNL176C	0.400107	-0.236257
ACVR1	YHR073W	0.986179	-0.237118
ACVR1	YAR020C	0.814302	-0.237132
ACVR1	YDL149W	2.04703	-0.237543
ACVR1	YDR112W	1.83007	-0.238852
ACVR1	YJL037W	3.96444	-0.239009
ACVR1	YOR253W	1.1017	-0.239675
ACVR1	YIL020C	0.333892	-0.239901
ACVR1	YLR113W	0.246545	-0.239976
ACVR1	YJL038C	2.15973	-0.240121
ACVR1	YBR246W	1.01295	-0.241321
ACVR1	YDL001W	0.178921	-0.241693
ACVR1	YOR100C	0.571984	-0.242299
ACVR1	YLR133W	0.557896	-0.242619
ACVR1	YOR358W	0.311351	-0.242893
ACVR1	YNL119W	0.145109	-0.243928
ACVR1	YPL046C	0.380383	-0.244536
ACVR1	YOR130C	0.515631	-0.24465
ACVR1	YML074C	1.73145	-0.24477
ACVR1	YJL211C	1.52576	-0.2453
ACVR1	YOR113W	0.486046	-0.245489
ACVR1	YMR020W	1.29753	-0.245905
ACVR1	YJR025C	1.37502	-0.245968
ACVR1	YOR339C	1.75399	-0.24601
ACVR1	YBR073W	0.652287	-0.246208
ACVR1	YLR130C	0.69737	-0.246449
ACVR1	YPL055C	0.136656	-0.246596
ACVR1	YOR338W	0.981953	-0.246662
ACVR1	YEL018W	0.471957	-0.246758
ACVR1	YJR080C	0.903059	-0.24697
ACVR1	YDR266C	0.187374	-0.24713
ACVR1	YBR245C	1.20314	-0.247866
ACVR1	YOL056W	0.694552	-0.247892
ACVR1	YBL068W	1.18201	-0.248636
ACVR1	YIL136W	0.356433	-0.248824
ACVR1	YIL009W	3.18959	-0.248876
ACVR1	YOR343C	1.98645	-0.249066
ACVR1	YLR165C	0.550852	-0.24946
ACVR1	YLR017W	1.98363	-0.250459
ACVR1	YER024W	1.27499	-0.250493
ACVR1	YNL082W	1.39615	-0.251055
ACVR1	YOL079W	0.938279	-0.251279
ACVR1	YAL008W	0.267677	-0.251467
ACVR1	YBL059W	1.25386	-0.252149
ACVR1	YIL001W	0.776264	-0.252412
ACVR1	YOR320C	2.0583	-0.252512
ACVR1	YCL012W	1.17919	-0.253626
ACVR1	YOR037W	2.00476	-0.253657
ACVR1	YOL085C	1.98645	-0.254046
ACVR1	YML119W	1.16087	-0.254138
ACVR1	YER062C	0.591708	-0.254495
ACVR1	YNL127W	0.894606	-0.255083
ACVR1	YNL142W	0.374748	-0.255825
ACVR1	YDL071C	0.49309	-0.256541
ACVR1	YNL235C	0.494499	-0.257221
ACVR1	YML003W	0.835435	-0.257469
ACVR1	YER119C-A	0.24091	-0.258428
ACVR1	YLR084C	0.346572	-0.259034
ACVR1	YDR135C	1.05521	-0.259176
ACVR1	YMR130W	0.791761	-0.259633
ACVR1	YJL049W	3.07547	-0.260479
ACVR1	YDR247W	0.736817	-0.260583
ACVR1	YDL176W	8.47551	-0.26129
ACVR1	YDR230W	0.383201	-0.261568
ACVR1	YMR302C	0.977726	-0.261735
ACVR1	YMR294W	0.256407	-0.262119
ACVR1	YDR068W	1.56943	-0.262592
ACVR1	YBL017C	0.235274	-0.26358
ACVR1	YIL042C	0.690326	-0.263989
ACVR1	YEL047C	2.33584	-0.264492
ACVR1	YBR259W	1.73849	-0.264681
ACVR1	YHL012W	0.569166	-0.265032
ACVR1	YHR035W	1.79344	-0.265147
ACVR1	YHL019C	0.487454	-0.2673
ACVR1	YMR153C-A	2.14142	-0.267436
ACVR1	YML121W	0.157789	-0.268578
ACVR1	YOL065C	1.34543	-0.268974
ACVR1	YDR295C	0.339527	-0.26902
ACVR1	YBR099C	0.0774855	-0.269057
ACVR1	YNL242W	0.618475	-0.26923
ACVR1	YML131W	1.2609	-0.26934
ACVR1	YPL227C	0.638199	-0.269586
ACVR1	YHR184W	0.994632	-0.269759
ACVR1	YLL021W	0.290219	-0.27009
ACVR1	YCL057W	0.464913	-0.270157
ACVR1	YJL094C	1.9625	-0.270462
ACVR1	YHR199C	0.604387	-0.270925
ACVR1	YMR305C	0.712867	-0.271045
ACVR1	YOL008W	0.260633	-0.27172
ACVR1	YCR015C	0.704414	-0.272975
ACVR1	YOR039W	0.221186	-0.273151
ACVR1	YLL061W	2.13015	-0.273309
ACVR1	YIL101C	0.62552	-0.273603
ACVR1	YDR102C	0.741043	-0.273826
ACVR1	YJR084W	1.07071	-0.274582
ACVR1	YPL027W	0.545216	-0.274993
ACVR1	YOR265W	1.18764	-0.275004
ACVR1	YER132C	0.93687	-0.275872
ACVR1	YPL033C	0.818529	-0.27708
ACVR1	YPL006W	1.04112	-0.277148
ACVR1	YPL053C	0.30008	-0.277197
ACVR1	YML103C	0.266268	-0.277267
ACVR1	YLR030W	1.60888	-0.277907
ACVR1	YJL013C	1.04394	-0.277928
ACVR1	YOR180C	1.22004	-0.278422
ACVR1	YAR028W	1.05521	-0.279879
ACVR1	YBL002W	0.321213	-0.2802
ACVR1	YOR049C	0.666376	-0.281105
ACVR1	YDR274C	0.216959	-0.281454
ACVR1	YJR077C	0.381792	-0.281941
ACVR1	YBR054W	1.00872	-0.282419
ACVR1	YJR058C	1.52858	-0.282876
ACVR1	YBR116C	0.481819	-0.282952
ACVR1	YER177W	0.590299	-0.283935
ACVR1	YNL304W	1.73004	-0.284298
ACVR1	YJL046W	0.109889	-0.284982
ACVR1	YPL171C	1.1651	-0.285517
ACVR1	YDL180W	7.33154	-0.285631
ACVR1	YOR171C	0.194418	-0.285743
ACVR1	YJR135C	0.38461	-0.28611
ACVR1	YBL005W	0.843888	-0.286288
ACVR1	YMR151W	0.442372	-0.28652
ACVR1	YNL140C	0.448007	-0.287087
ACVR1	YIL015W	0.648061	-0.287135
ACVR1	YAR029W	1.06507	-0.287211
ACVR1	YER078C	0.556487	-0.28752
ACVR1	YMR048W	0.790352	-0.287535
ACVR1	YER137C	0.484637	-0.288221
ACVR1	YOR038C	0.308533	-0.288224
ACVR1	YLR077W	1.70891	-0.288611
ACVR1	YPL088W	0.356433	-0.290233
ACVR1	YHL040C	0.670602	-0.290639
ACVR1	YBR161W	0.591708	-0.29126
ACVR1	YBL019W	0.569166	-0.291819
ACVR1	YLR179C	0.377566	-0.292455
ACVR1	YJR153W	2.83456	-0.292612
ACVR1	YBL031W	0.114115	-0.292801
ACVR1	YMR139W	0.486046	-0.293008
ACVR1	YLL052C	1.68355	-0.293903
ACVR1	YDR006C	3.61083	-0.294134
ACVR1	YAR031W	1.02422	-0.295667
ACVR1	YMR294W-A	0.896014	-0.295859
ACVR1	YNL121C	0.169059	-0.296101
ACVR1	YJR062C	1.723	-0.296372
ACVR1	YDL242W	2.67677	-0.296624
ACVR1	YDL086W	0.614249	-0.296713
ACVR1	YCL013W	0.748088	-0.296848
ACVR1	YDR314C	0.593116	-0.297888
ACVR1	YPL215W	0.140883	-0.298088
ACVR1	YJL112W	1.73004	-0.298129
ACVR1	YHR160C	0.645243	-0.298283
ACVR1	YER106W	1.01858	-0.298306
ACVR1	YDL059C	0.0845297	-0.298625
ACVR1	YNL307C	0.0464913	-0.298693
ACVR1	YMR100W	0.666376	-0.299118
ACVR1	YBR204C	1.25527	-0.299232
ACVR1	YCL023C	4.52234	-0.299409
ACVR1	YDR255C	0.0464913	-0.299755
ACVR1	YLR213C	0.409969	-0.300994
ACVR1	YER002W	0.226821	-0.302776
ACVR1	YPL056C	0.462095	-0.302795
ACVR1	YDL192W	0.111297	-0.302865
ACVR1	YDL161W	3.82074	-0.302961
ACVR1	YML100W	0.724137	-0.303119
ACVR1	YML090W	0.663558	-0.303137
ACVR1	YOR374W	0.639608	-0.304315
ACVR1	YDR216W	0.628337	-0.304864
ACVR1	YJL216C	1.22991	-0.305856
ACVR1	YPL099C	0.983362	-0.305863
ACVR1	YPL236C	0.641017	-0.306453
ACVR1	YDR030C	2.54293	-0.307017
ACVR1	YMR181C	0.953776	-0.307345
ACVR1	YDL106C	0.0746679	-0.307462
ACVR1	YLR064W	0.76922	-0.307598
ACVR1	YDL146W	0.919964	-0.307969
ACVR1	YOL032W	0.735408	-0.308429
ACVR1	YOL025W	0.473366	-0.309021
ACVR1	YBR150C	0.440963	-0.309065
ACVR1	YCL064C	0.511404	-0.309076
ACVR1	YER174C	0.772038	-0.309348
ACVR1	YBR052C	1.39333	-0.309618
ACVR1	YOR188W	3.4784	-0.310191
ACVR1	YMR096W	1.03126	-0.310466
ACVR1	YIL028W	0.54099	-0.310729
ACVR1	YMR182C	1.60747	-0.310735
ACVR1	YNL311C	1.72581	-0.311057
ACVR1	YPL110C	0.955185	-0.31131
ACVR1	YBR032W	0.424057	-0.312206
ACVR1	YJL045W	2.21609	-0.313022
ACVR1	YDR148C	0.600161	-0.313772
ACVR1	YJR129C	0.917147	-0.313888
ACVR1	YHR013C	0.0352207	-0.315017
ACVR1	YER072W	0.494499	-0.315243
ACVR1	YNL338W	0.707232	-0.315398
ACVR1	YPL077C	0.369113	-0.315593
ACVR1	YML076C	0.976318	-0.316123
ACVR1	YDR205W	1.52858	-0.316455
ACVR1	YDR117C	0.691734	-0.317592
ACVR1	YOR201C	0.0943915	-0.318227
ACVR1	YNL170W	0.239501	-0.318595
ACVR1	YOR216C	0.621293	-0.31908
ACVR1	YOR062C	1.53985	-0.31946
ACVR1	YBR226C	1.53985	-0.320122
ACVR1	YDR121W	0.440963	-0.320829
ACVR1	YBR101C	0.587481	-0.320983
ACVR1	YDL186W	3.76439	-0.32198
ACVR1	YDR124W	1.72441	-0.322138
ACVR1	YDL129W	1.51026	-0.322175
ACVR1	YHR127W	2.57111	-0.322418
ACVR1	YML110C	0.66074	-0.323077
ACVR1	YML013W	0.174695	-0.323193
ACVR1	YNL130C	1.33839	-0.323385
ACVR1	YDR120C	0.0972091	-0.324354
ACVR1	YMR307W	0.322622	-0.324503
ACVR1	YML002W	0.783308	-0.324526
ACVR1	YNL057W	1.79344	-0.32502
ACVR1	YDL046W	0.32403	-0.325425
ACVR1	YBR093C	0.779082	-0.325649
ACVR1	YLL009C	0.462095	-0.326046
ACVR1	YMR258C	0.672011	-0.326128
ACVR1	YER134C	0.600161	-0.327544
ACVR1	YJL214W	1.36938	-0.328777
ACVR1	YPL038W	0.486046	-0.329149
ACVR1	YMR199W	0.762176	-0.330709
ACVR1	YLR151C	0.593116	-0.331129
ACVR1	YOL020W	0.140883	-0.331201
ACVR1	YIL085C	1.81598	-0.331497
ACVR1	YLR138W	0.407151	-0.331646
ACVR1	YHL009C	0.297263	-0.331911
ACVR1	YHR106W	0.731182	-0.332645
ACVR1	YPL073C	0.553669	-0.333369
ACVR1	YHR189W	0.652287	-0.333702
ACVR1	YOL012C	0.0760767	-0.334674
ACVR1	YBR098W	0.231048	-0.335126
ACVR1	YBR183W	0.894606	-0.335377
ACVR1	YEL025C	0.893197	-0.336507
ACVR1	YBL082C	0.367704	-0.337345
ACVR1	YLR024C	0.63679	-0.337545
ACVR1	YOR087W	0.633972	-0.337864
ACVR1	YJR038C	1.40037	-0.338205
ACVR1	YDL093W	0.891788	-0.33835
ACVR1	YMR233W	1.43278	-0.338568
ACVR1	YHL046C	0.28881	-0.338631
ACVR1	YHR080C	0.777673	-0.338732
ACVR1	YPL244C	0.764993	-0.339154
[truncated: 34,493 more rows]
