# Supplementary material for: Yeast-Based Genetic Interaction Analysis of Human Kinome
Source: Cells. 2020 May 7;9(5):1156. doi: 10.3390/cells9051156 (PMC7291280; doi:10.3390/cells9051156)
Supplement: Supplementary file 1 [file cells-09-01156-s001.zip › Supplementary_Table_S4.xlsx]

## Sheet: Sheet1
Table S4. Human orthologs of the toxicity suppressors.
Kinase gene		Yeast gene		Human ortholog
Gene name	Function category	Subject	Z-score	Ensembl No.	Gene name	Function category	Full name
ABL1	Cell death and survival	YPL236C	2.98379	ENSP00000387156	STK16	Post-Translational Modification	serine/threonine kinase 16 [Source:HGNC Symbol;Acc:11394]
ABL1	Cell death and survival	YOR115C	3.55094	ENSP00000006275	TRAPPC6A		Trafficking protein particle complex subunit 6A (TRAPP complex subunit 6A) [Source:UniProtKB/Swiss-Prot;Acc:O75865]
ABL1	Cell death and survival	YLR085C	4.29585	ENSP00000188312	ACTR6		Actin-related protein 6 (hArp6) (hARPX). [Source:Uniprot/SWISSPROT;Acc:Q9GZN1]
ABL1	Cell death and survival	YOR245C	3.54365	ENSP00000198801	MOGAT2	Small Molecule Biochemistry	monoacylglycerol O-acyltransferase 2 [Source:RefSeq_peptide;Acc:NP_079374]
ABL1	Cell death and survival	YBL013W	2.05915	ENSP00000220058	MTFMT		Methionyl-tRNA formyltransferase, mitochondrial precursor (EC 2.1.2.9) (MtFMT). [Source:Uniprot/SWISSPROT;Acc:Q96DP5]
ABL1	Cell death and survival	YCR017C	2.22136	ENSP00000226432	CWH43	Cancer	PGAP2-interacting protein [Source:UniProtKB/Swiss-Prot;Acc:Q9H720]
ABL1	Cell death and survival	YEL063C	3.11832	ENSP00000231706	SLC7A14		solute carrier family 7 (cationic amino acid transporter, y+ system), member 14 [Source:RefSeq_peptide;Acc:NP_066000]
ABL1	Cell death and survival	YBR068C	3.01107	ENSP00000231706	SLC7A14		solute carrier family 7 (cationic amino acid transporter, y+ system), member 14 [Source:RefSeq_peptide;Acc:NP_066000]
ABL1	Cell death and survival	YHR176W	3.56959	ENSP00000236166	FMO6P		Putative dimethylaniline monooxygenase [N-oxide-forming] 6 (EC 1.14.13.8) (Flavin-containing monooxygenase 6) (FMO 6) (Dimethylaniline oxidase 6). [Source:Uniprot/SWISSPROT;Acc:O60774]
ABL1	Cell death and survival	YNL271C	3.29374	ENSP00000247170	DAAM1		Disheveled-associated activator of morphogenesis 1 [Source:UniProtKB/Swiss-Prot;Acc:Q9Y4D1]
ABL1	Cell death and survival	YPL273W	2.3757	ENSP00000255192	BHMT2	Small Molecule Biochemistry	Betaine--homocysteine S-methyltransferase 2 (EC 2.1.1.5) [Source:UniProtKB/Swiss-Prot;Acc:Q9H2M3]
ABL1	Cell death and survival	YDL091C	3.58823	ENSP00000261942	FAF2	Small Molecule Biochemistry	protein expressed in T-cells and eosinophils in atopic dermatitis [Source:RefSeq_peptide;Acc:NP_055428]
ABL1	Cell death and survival	YOR289W	3.2606	ENSP00000262844	AMMECR1		AMME syndrome candidate gene 1 protein. [Source:Uniprot/SWISSPROT;Acc:Q9Y4X0]
ABL1	Cell death and survival	YAR003W	2.37609	ENSP00000264515	RBBP5	DNA Replication, Recombination, and Repair	Retinoblastoma-binding protein 5 (RBBP-5) (Retinoblastoma-binding protein RBQ-3). [Source:Uniprot/SWISSPROT;Acc:Q15291]
ABL1	Cell death and survival	YJL130C	2.7401	ENSP00000264705	CAD	Small Molecule Biochemistry	CAD protein [Includes Glutamine-dependent carbamoyl-phosphate synthase(EC 6.3.5.5);Aspartate carbamoyltransferase(EC 2.1.3.2);Dihydroorotase(EC 3.5.2.3)] [Source:UniProtKB/Swiss-Prot;Acc:P27708]
ABL1	Cell death and survival	YJL197W	2.84752	ENSP00000265560	USP4	Protein Synthesis	Ubiquitin carboxyl-terminal hydrolase 4 (EC 3.1.2.15) (Ubiquitin thiolesterase 4) (Ubiquitin-specific processing protease 4) (Deubiquitinating enzyme 4) (Ubiquitous nuclear protein homolog). [Source:Uniprot/SWISSPROT;Acc:Q13107]
ABL1	Cell death and survival	YNL093W	2.14775	ENSP00000273047	RAB5A	Cell Death and Survival	Ras-related protein Rab-5A. [Source:Uniprot/SWISSPROT;Acc:P20339]
ABL1	Cell death and survival	YPL273W	2.3757	ENSP00000274353	BHMT	Nucleic Acid Metabolism	Betaine--homocysteine S-methyltransferase 1 (EC 2.1.1.5) [Source:UniProtKB/Swiss-Prot;Acc:Q93088]
ABL1	Cell death and survival	YDR330W	4.36335	ENSP00000296328	UBXN7		UBX domain-containing protein 7 [Source:UniProtKB/Swiss-Prot;Acc:O94888]
ABL1	Cell death and survival	YOR136W	2.9787	ENSP00000299518	IDH3A	Nucleic Acid Metabolism	Isocitrate dehydrogenase [NAD] subunit alpha, mitochondrial precursor (EC 1.1.1.41) (Isocitric dehydrogenase) (NAD(+)-specific ICDH). [Source:Uniprot/SWISSPROT;Acc:P50213]
ABL1	Cell death and survival	YOR093C	2.01977	ENSP00000301180	DIP2B		Disco-interacting protein 2 homolog B (DIP2 homolog B) [Source:UniProtKB/Swiss-Prot;Acc:Q9P265]
ABL1	Cell death and survival	YOR175C	2.32052	ENSP00000302177	MBOAT2		O-acyltransferase (membrane bound) domain containing 2 [Source:RefSeq_peptide;Acc:NP_620154]
ABL1	Cell death and survival	YOL027C	3.12425	ENSP00000305653	LETM1	Cell Death and Survival	Leucine zipper-EF-hand containing transmembrane protein 1, mitochondrial precursor. [Source:Uniprot/SWISSPROT;Acc:O95202]
ABL1	Cell death and survival	YJR048W	2.63569	ENSP00000307786	CYCS	Cell Death and Survival	Cytochrome c. [Source:Uniprot/SWISSPROT;Acc:P99999]
ABL1	Cell death and survival	YPL022W	2.16453	ENSP00000310520	ERCC4	DNA Replication, Recombination, and Repair	DNA repair endonuclease XPF (EC 3.1.-.-) (DNA excision repair protein ERCC-4) (DNA-repair protein complementing XP-F cell) (Xeroderma pigmentosum group F complementing protein). [Source:Uniprot/SWISSPROT;Acc:Q92889]
ABL1	Cell death and survival	YER042W	2.26049	ENSP00000313921	MSRA	Small Molecule Biochemistry	Peptide methionine sulfoxide reductase (EC 1.8.4.6) (Protein- methionine-S-oxide reductase) (PMSR) (Peptide Met(O) reductase). [Source:Uniprot/SWISSPROT;Acc:Q9UJ68]
ABL1	Cell death and survival	YIL009W	3.13984	ENSP00000339787	ACSL4	Cell Death and Survival	Long-chain-fatty-acid--CoA ligase 4 (EC 6.2.1.3) (Long-chain acyl-CoA synthetase 4) (LACS 4). [Source:Uniprot/SWISSPROT;Acc:O60488]
ABL1	Cell death and survival	YMR246W	2.45955	ENSP00000339787	ACSL4	Cell Death and Survival	Long-chain-fatty-acid--CoA ligase 4 (EC 6.2.1.3) (Long-chain acyl-CoA synthetase 4) (LACS 4). [Source:Uniprot/SWISSPROT;Acc:O60488]
ABL1	Cell death and survival	YER004W	3.82432	ENSP00000344925	HTATIP2		HIV-1 Tat interactive protein 2, 30kDa [Source:RefSeq_peptide;Acc:NP_006401]
ABL1	Cell death and survival	YDR263C	3.32424	ENSP00000355506	EXO1	Cell Death and Survival	Exonuclease 1 (hExo1)(EC 3.1.-.-)(Exonuclease I)(hExoI) [Source:UniProtKB/Swiss-Prot;Acc:Q9UQ84]
ABL1	Cell death and survival	YOR285W	3.09237	ENSP00000357004
ABL1	Cell death and survival	YIL064W	2.85435	ENSP00000357830	METTL10		Methyltransferase-like protein 10 (EC 2.1.1.-) [Source:UniProtKB/Swiss-Prot;Acc:Q5JPI9]
ABL1	Cell death and survival	YMR152W	2.52708	ENSP00000358059	RTN4IP1		Reticulon-4-interacting protein 1 Precursor (NOGO-interacting mitochondrial protein) [Source:UniProtKB/Swiss-Prot;Acc:Q8WWV3]
ABL1	Cell death and survival	YBR008C	1.99618	ENSP00000358515	SLC22A15		solute carrier family 22, member 15 [Source:HGNC Symbol;Acc:20301]
ABL1	Cell death and survival	YHL022C	2.87192	ENSP00000360304
ABL1	Cell death and survival	YJR040W	2.23727	ENSP00000365256	CLCN5	Molecular Transport	Chloride channel protein 5 (ClC-5) [Source:UniProtKB/Swiss-Prot;Acc:P51795]
ABL1	Cell death and survival	YOR321W	3.69321	ENSP00000365770	MTHFR	Small Molecule Biochemistry	Methylenetetrahydrofolate reductase (EC 1.5.1.20) [Source:UniProtKB/Swiss-Prot;Acc:P42898]
ABL1	Cell death and survival	YHR135C	3.492	ENSP00000378807	CSNK1G3		Casein kinase I isoform gamma-3 (CKI-gamma 3)(EC 2.7.11.1) [Source:UniProtKB/Swiss-Prot;Acc:Q9Y6M4]
ABL1	Cell death and survival	YDL052C	3.89828	ENSP00000378877	AGPAT1	Lipid Metabolism	1-acyl-sn-glycerol-3-phosphate acyltransferase alpha (EC 2.3.1.51)(1-AGP acyltransferase 1)(1-AGPAT 1)(Lysophosphatidic acid acyltransferase alpha)(LPAAT-alpha)(1-acylglycerol-3-phosphate O-acyltransferase 1)(Protein G15) [Source:UniProtKB/Swiss-Prot;Acc:Q99943]
ABL1	Cell death and survival	YDR272W	2.25324	ENSP00000380514	HAGH	Molecular Transport	Hydroxyacylglutathione hydrolase (EC 3.1.2.6)(Glyoxalase II)(Glx II) [Source:UniProtKB/Swiss-Prot;Acc:Q16775]
ABL1	Cell death and survival	YCL039W	3.82154	ENSP00000381237	HM13		Minor histocompatibility antigen H13 (EC 3.4.23.-)(Signal peptide peptidase)(Presenilin-like protein 3)(hIMP1 protein) [Source:UniProtKB/Swiss-Prot;Acc:Q8TCT9]
ABL1	Cell death and survival	YJR134C	2.0282	ENSP00000381567	TMF1		TATA element modulatory factor (TMF) [Source:UniProtKB/Swiss-Prot;Acc:P82094]
ABL1	Cell death and survival	YJL141C	2.02115	ENSP00000381932	DYRK1A	Cell Morphology	Dual specificity tyrosine-phosphorylation-regulated kinase 1A (EC 2.7.12.1)(Protein kinase minibrain homolog)(MNBH)(hMNB)(HP86)(Dual specificity YAK1-related kinase) [Source:UniProtKB/Swiss-Prot;Acc:Q13627]
ABL1	Cell death and survival	YDL052C	3.89828	ENSP00000382525	AGPAT1	Lipid Metabolism	1-acyl-sn-glycerol-3-phosphate acyltransferase alpha (EC 2.3.1.51)(1-AGP acyltransferase 1)(1-AGPAT 1)(Lysophosphatidic acid acyltransferase alpha)(LPAAT-alpha)(1-acylglycerol-3-phosphate O-acyltransferase 1)(Protein G15) [Source:UniProtKB/Swiss-Prot;Acc:Q99943]
ABL1	Cell death and survival	YDL052C	3.89828	ENSP00000382726	AGPAT1	Lipid Metabolism	1-acyl-sn-glycerol-3-phosphate acyltransferase alpha (EC 2.3.1.51)(1-AGP acyltransferase 1)(1-AGPAT 1)(Lysophosphatidic acid acyltransferase alpha)(LPAAT-alpha)(1-acylglycerol-3-phosphate O-acyltransferase 1)(Protein G15) [Source:UniProtKB/Swiss-Prot;Acc:Q99943]
ABL1	Cell death and survival	YER007W	2.3677	ENSP00000384571	TBCE	Cell Signaling	Tubulin-specific chaperone E (Tubulin-folding cofactor E) [Source:UniProtKB/Swiss-Prot;Acc:Q15813]
ABL1	Cell death and survival	YOR307C	2.09307	ENSP00000387152	SLC35E1		solute carrier family 35, member E1 [Source:HGNC Symbol;Acc:20803]
ACVR1	Cell death and survival	YPL274W	2.87394	ENSP00000231706	SLC7A14		solute carrier family 7 (cationic amino acid transporter, y+ system), member 14 [Source:RefSeq_peptide;Acc:NP_066000]
ACVR1	Cell death and survival	YHL003C	2.22249	ENSP00000251363	CERS4	Small Molecule Biochemistry	LAG1 longevity assurance homolog 4. [Source:Uniprot/SWISSPROT;Acc:Q9HA82]
ACVR1	Cell death and survival	YIL045W	2.2337	ENSP00000360035	PPP1R3D	Cell Death and Survival	Protein phosphatase 1 regulatory subunit 3D (Protein phosphatase 1, regulatory subunit 6)(Protein phosphatase 1-binding subunit R6) [Source:UniProtKB/Swiss-Prot;Acc:O95685]
ACVR1	Cell death and survival	YMR276W	2.03239	ENSP00000365576	UBQLN1	Cell Death and Survival	Ubiquilin-1 (Protein linking IAP with cytoskeleton 1)(PLIC-1)(hPLIC-1) [Source:UniProtKB/Swiss-Prot;Acc:Q9UMX0]
ACVR1	Cell death and survival	YDL061C	3.58941	ENSP00000379339	RPS29		40S ribosomal protein S29 [Source:UniProtKB/Swiss-Prot;Acc:P62273]
ACVR1	Cell death and survival	YMR010W	2.02804	ENSP00000380880	PQLC1		PQ-loop repeat-containing protein 1 [Source:UniProtKB/Swiss-Prot;Acc:Q8N2U9]
AGK	Molecular Transport	YIL125W	2.76406	ENSP00000222673	OGDH	Nucleic Acid Metabolism	2-oxoglutarate dehydrogenase E1 component, mitochondrial precursor (EC 1.2.4.2) (Alpha-ketoglutarate dehydrogenase). [Source:Uniprot/SWISSPROT;Acc:Q02218]
AGK	Molecular Transport	YNL325C	2.15237	ENSP00000230124	FIG4	Small Molecule Biochemistry	SAC domain-containing protein 3. [Source:Uniprot/SWISSPROT;Acc:Q92562]
AGK	Molecular Transport	YLL061W	2.88419	ENSP00000231706	SLC7A14		solute carrier family 7 (cationic amino acid transporter, y+ system), member 14 [Source:RefSeq_peptide;Acc:NP_066000]
AGK	Molecular Transport	YDR256C	3.47193	ENSP00000241052	CAT	Cell Death and Survival	Catalase (EC 1.11.1.6). [Source:Uniprot/SWISSPROT;Acc:P04040]
AGK	Molecular Transport	YHL003C	2.09472	ENSP00000251363	CERS4	Small Molecule Biochemistry	LAG1 longevity assurance homolog 4. [Source:Uniprot/SWISSPROT;Acc:Q9HA82]
AGK	Molecular Transport	YHR163W	2.28815	ENSP00000252603	PGLS	Nucleic Acid Metabolism	6-phosphogluconolactonase (EC 3.1.1.31) (6PGL). [Source:Uniprot/SWISSPROT;Acc:O95336]
AGK	Molecular Transport	YHR204W	4.06305	ENSP00000256497	EDEM1		ER degradation-enhancing alpha-mannosidase-like. [Source:Uniprot/SWISSPROT;Acc:Q92611]
AGK	Molecular Transport	YHL030W	2.1272	ENSP00000259335	KIAA0368	Protein Synthesis	Proteasome-associated protein ECM29 homolog (Ecm29). [Source:Uniprot/SWISSPROT;Acc:Q5VYK3]
AGK	Molecular Transport	YBR103W	3.06282	ENSP00000263964	TBL1XR1		F-box-like/WD-repeat protein TBL1XR1 (Transducin beta-like 1X-linked receptor 1) (Nuclear receptor corepressor/HDAC3 complex subunit TBLR1) (TBL1-related protein 1). [Source:Uniprot/SWISSPROT;Acc:Q9BZK7]
AGK	Molecular Transport	YER177W	2.5227	ENSP00000264335	YWHAE	Cell Death and Survival	14-3-3 protein epsilon (14-3-3E). [Source:Uniprot/SWISSPROT;Acc:P62258]
AGK	Molecular Transport	YDR162C	1.98424	ENSP00000269886	SH3GL1	Cancer	Endophilin-A2 (Endophilin-2)(SH3 domain-containing GRB2-like protein 1)(SH3 domain protein 2B)(Extra eleven-nineteen leukemia fusion gene protein)(EEN)(EEN fusion partner of MLL) [Source:UniProtKB/Swiss-Prot;Acc:Q99961]
AGK	Molecular Transport	YOR112W	2.05788	ENSP00000270176	SCYL1	Cellular Assembly and Organization	SCYL1 protein (Fragment). [Source:Uniprot/SPTREMBL;Acc:Q96G50]
AGK	Molecular Transport	YDR019C	2.10324	ENSP00000273588	AMT		Aminomethyltransferase, mitochondrial precursor (EC 2.1.2.10) (Glycine cleavage system T protein) (GCVT). [Source:Uniprot/SWISSPROT;Acc:P48728]
AGK	Molecular Transport	YOR375C	2.30318	ENSP00000277865	GLUD1	Cell Death and Survival	Glutamate dehydrogenase 1, mitochondrial precursor (EC 1.4.1.3) (GDH). [Source:Uniprot/SWISSPROT;Acc:P00367]
AGK	Molecular Transport	YMR221C	2.20724	ENSP00000278426	SLC43A1	Molecular Transport	Large neutral amino acids transporter small subunit 3 (L-type amino acid transporter 3) (Solute carrier family 43 member 1) (Prostate cancer overexpressed gene 1 protein). [Source:Uniprot/SWISSPROT;Acc:O75387]
AGK	Molecular Transport	YDL168W	3.16942	ENSP00000296412	ADH5	Nucleic Acid Metabolism	Alcohol dehydrogenase class III chi chain (EC 1.1.1.1) (S- (hydroxymethyl)glutathione dehydrogenase) (EC 1.1.1.284) (Glutathione- dependent formaldehyde dehydrogenase) (FDH). [Source:Uniprot/SWISSPROT;Acc:P11766]
AGK	Molecular Transport	YML131W	2.01679	ENSP00000311572	PTGR1	Cell Death and Survival	NADP-dependent leukotriene B4 12-hydroxydehydrogenase (EC 1.3.1.74) (15-oxoprostaglandin 13-reductase) (EC 1.3.1.48). [Source:Uniprot/SWISSPROT;Acc:Q14914]
AGK	Molecular Transport	YOR120W	1.96458	ENSP00000312606	AKR1A1	Small Molecule Biochemistry	Alcohol dehydrogenase [NADP+] (EC 1.1.1.2)(Aldehyde reductase)(Aldo-keto reductase family 1 member A1) [Source:UniProtKB/Swiss-Prot;Acc:P14550]
AGK	Molecular Transport	YDR018C	2.3051	ENSP00000314036	AGPAT4		1-acyl-sn-glycerol-3-phosphate acyltransferase delta (EC 2.3.1.51) (1- AGP acyltransferase 4) (1-AGPAT 4) (Lysophosphatidic acid acyltransferase-delta) (LPAAT-delta) (1-acylglycerol-3-phosphate O- acyltransferase 4). [Source:Uniprot/SWISSPROT;Acc:Q9NRZ5]
AGK	Molecular Transport	YHL007C	2.48452	ENSP00000314067	PAK2	Post-Translational Modification	Serine/threonine-protein kinase PAK 2 (EC 2.7.1.37) (p21-activated kinase 2) (PAK-2) (PAK65) (Gamma-PAK) (S6/H4 kinase). [Source:Uniprot/SWISSPROT;Acc:Q13177]
AGK	Molecular Transport	YJL098W	2.03571	ENSP00000321013	PPP6R1		SAPS domain family member 1 (Protein phosphatase 6, regulatory subunit 1) [Source:UniProtKB/Swiss-Prot;Acc:Q9UPN7]
AGK	Molecular Transport	YCL037C	2.33476	ENSP00000321997	LARP1B	Cell Death and Survival	La ribonucleoprotein domain family member 2 isoform 1 [Source:RefSeq_peptide;Acc:NP_060548]
AGK	Molecular Transport	YMR186W	2.20817	ENSP00000325875	HSP90AB1	Cell Death and Survival	Heat shock protein HSP 90-beta (HSP 90)(HSP 84) [Source:UniProtKB/Swiss-Prot;Acc:P08238]
AGK	Molecular Transport	YBR177C	2.65125	ENSP00000326491	ABHD1		alpha/beta hydrolase domain containing protein 1 isoform 1 [Source:RefSeq_peptide;Acc:NP_115993]
AGK	Molecular Transport	YOR375C	2.30318	ENSP00000327589	GLUD2	Small Molecule Biochemistry	Glutamate dehydrogenase 2, mitochondrial precursor (EC 1.4.1.3) (GDH). [Source:Uniprot/SWISSPROT;Acc:P49448]
AGK	Molecular Transport	YER174C	2.17629	ENSP00000330836	GLRX3		Glutaredoxin-3 (Thioredoxin-like protein 2)(PKC-interacting cousin of thioredoxin)(PKC-theta-interacting protein)(PKCq-interacting protein) [Source:UniProtKB/Swiss-Prot;Acc:O76003]
AGK	Molecular Transport	YIL160C	2.00196	ENSP00000333664	ACAA1	Lipid Metabolism	3-ketoacyl-CoA thiolase, peroxisomal precursor (EC 2.3.1.16) (Beta- ketothiolase) (Acetyl-CoA acyltransferase) (Peroxisomal 3-oxoacyl-CoA thiolase). [Source:Uniprot/SWISSPROT;Acc:P09110]
AGK	Molecular Transport	YBL064C	2.51868	ENSP00000342026	PROX6		Peroxiredoxin-6 (EC 1.11.1.15)(Antioxidant protein 2)(1-Cys peroxiredoxin)(1-Cys PRX)(Acidic calcium-independent phospholipase A2)(aiPLA2)(EC 3.1.1.-)(Non-selenium glutathione peroxidase)(NSGPx)(EC 1.11.1.7)(24 kDa protein)(Liver 2D page spot 40)(Red blood cells page spot 12) [Source:UniProtKB/Swiss-Prot;Acc:P30041]
AGK	Molecular Transport	YNL125C	2.19012	ENSP00000343022	SLC16A12		solute carrier family 16 (monocarboxylic acid transporters), member 12 [Source:RefSeq_peptide;Acc:NP_998771]
AGK	Molecular Transport	YOR339C	3.68747	ENSP00000348838	UBE2C	Cell Death and Survival	Ubiquitin-conjugating enzyme E2 C (EC 6.3.2.19)(Ubiquitin-protein ligase C)(Ubiquitin carrier protein C)(UbcH10) [Source:UniProtKB/Swiss-Prot;Acc:O00762]
AGK	Molecular Transport	YMR132C	3.04657	ENSP00000348933	CCDC25		coiled-coil domain containing 25 isoform 2 [Source:RefSeq_peptide;Acc:NP_060716]
AGK	Molecular Transport	YOR005C	1.98513	ENSP00000349393	LIG4	Cell Death and Survival	DNA ligase IV (EC 6.5.1.1) (Polydeoxyribonucleotide synthase [ATP]). [Source:Uniprot/SWISSPROT;Acc:P49917]
AGK	Molecular Transport	YBR104W	2.4094	ENSP00000352167	SLC25A29	Molecular Transport	Mitchondrial carnitine/acylcarnitine carrier protein CACL (CACT-like). [Source:Uniprot/SWISSPROT;Acc:Q8N8R3]
AGK	Molecular Transport	YDR282C	3.00176	ENSP00000356272	RMND1		Required for meiotic nuclear division protein 1 homolog [Source:UniProtKB/Swiss-Prot;Acc:Q9NWS8]
AGK	Molecular Transport	YNL200C	3.45569	ENSP00000357218	APOA1BP		Apolipoprotein A-I-binding protein Precursor (AI-BP)(YjeF N-terminal domain-containing protein 1) [Source:UniProtKB/Swiss-Prot;Acc:Q8NCW5]
AGK	Molecular Transport	YDR225W	2.60918	ENSP00000358155	HIST2H2AA3/HIST2H2AA4		Histone H2A type 2-A (H2A.2)(H2A/o) [Source:UniProtKB/Swiss-Prot;Acc:Q6FI13]
AGK	Molecular Transport	YDR225W	2.60918	ENSP00000358158	HIST2H2AA3/HIST2H2AA4		Histone H2A type 2-A (H2A.2)(H2A/o) [Source:UniProtKB/Swiss-Prot;Acc:Q6FI13]
AGK	Molecular Transport	YNL127W	2.13433	ENSP00000358810	STRIP1		Protein FAM40A [Source:UniProtKB/Swiss-Prot;Acc:Q5VSL9]
AGK	Molecular Transport	YDR109C	2.77882	ENSP00000360262	FGGY	Cell Cycle	FGGY carbohydrate kinase domain-containing protein (EC 2.7.1.-) [Source:UniProtKB/Swiss-Prot;Acc:Q96C11]
AGK	Molecular Transport	YJR103W	2.7137	ENSP00000361704	CTPS1	Nucleic Acid Metabolism	CTP synthase 1 (EC 6.3.4.2)(UTP--ammonia ligase 1)(CTP synthetase 1) [Source:UniProtKB/Swiss-Prot;Acc:P17812]
AGK	Molecular Transport	YPL225W	3.49512	ENSP00000362456	PBDC1		UPF0368 protein Cxorf26 [Source:UniProtKB/Swiss-Prot;Acc:Q9BVG4]
AGK	Molecular Transport	YDR121W	2.54818	ENSP00000363284	POLE3	Cancer	polymerase (DNA directed), epsilon 3, accessory subunit [Source:HGNC Symbol;Acc:13546]
AGK	Molecular Transport	YDR225W	2.60918	ENSP00000364310	H2AFX	Cell Death and Survival	Histone H2A.x (H2a/x) [Source:UniProtKB/Swiss-Prot;Acc:P16104]
AGK	Molecular Transport	YPL212C	2.03268	ENSP00000365837	PUS1		tRNA pseudouridine synthase A (EC 5.4.99.12)(tRNA-uridine isomerase I)(tRNA pseudouridylate synthase I) [Source:UniProtKB/Swiss-Prot;Acc:Q9Y606]
AGK	Molecular Transport	YDR225W	2.60918	ENSP00000367022	HIST1H2AC		Histone H2A type 1-C (H2A/l) [Source:UniProtKB/Swiss-Prot;Acc:Q93077]
AGK	Molecular Transport	YOL016C	3.25034	ENSP00000368124	CAMK1D	Cellular Assembly and Organization	Calcium/calmodulin-dependent protein kinase type 1D (EC 2.7.11.17)(CaM kinase I delta)(CaM kinase ID)(CaM-KI delta)(CaMKI-delta)(CaMKI delta)(Camk1D)(CamKI-like protein kinase)(CKLiK) [Source:UniProtKB/Swiss-Prot;Acc:Q8IU85]
AGK	Molecular Transport	YLR017W	1.9994	ENSP00000369519	MTAP	Nucleic Acid Metabolism	S-methyl-5'-thioadenosine phosphorylase (EC 2.4.2.28)(5'-methylthioadenosine phosphorylase)(MTA phosphorylase)(MTAPase) [Source:UniProtKB/Swiss-Prot;Acc:Q13126]
AGK	Molecular Transport	YIL131C	3.14985	ENSP00000370256	FOXC1		Forkhead box protein C1 (Forkhead-related protein FKHL7)(Forkhead-related transcription factor 3)(FREAC-3) [Source:UniProtKB/Swiss-Prot;Acc:Q12948]
AGK	Molecular Transport	YPL222W	3.32759	ENSP00000370288	DNM1L	Cell Death and Survival	Dynamin-1-like protein (EC 3.6.5.5)(Dynamin-like protein)(Dnm1p/Vps1p-like protein)(DVLP)(Dynamin family member proline-rich carboxyl-terminal domain less)(Dymple)(Dynamin-related protein 1)(Dynamin-like protein 4)(Dynamin-like protein IV)(HdynIV) [Source:UniProtKB/Swiss-Prot;Acc:O00429]
AGK	Molecular Transport	YHR018C	2.47445	ENSP00000378741	ASL	Small Molecule Biochemistry	Argininosuccinate lyase (ASAL)(EC 4.3.2.1)(Arginosuccinase) [Source:UniProtKB/Swiss-Prot;Acc:P04424]
ASCIZ		YDR214W	2.06327	ENSP00000216479	AHSA1	Cell Death and Survival	Activator of 90 kDa heat shock protein ATPase homolog 1 (AHA1) (p38). [Source:Uniprot/SWISSPROT;Acc:O95433]
ASCIZ		YBR084W	2.19919	ENSP00000216605	MTHFD1	Small Molecule Biochemistry	C-1-tetrahydrofolate synthase, cytoplasmic (C1-THF synthase) [Includes: Methylenetetrahydrofolate dehydrogenase (EC 1.5.1.5); Methenyltetrahydrofolate cyclohydrolase (EC 3.5.4.9); Formyltetrahydrofolate synthetase (EC 6.3.4.3)]. [Source:Uniprot/SWISSPROT;Acc:P11586]
ASCIZ		YML104C	2.14059	ENSP00000242044	SNX13		Sorting nexin-13 (RGS domain- and PHOX domain-containing protein)(RGS-PX1) [Source:UniProtKB/Swiss-Prot;Acc:Q9Y5W8]
ASCIZ		YDR266C	2.52108	ENSP00000248125	ZNF598		Zinc finger protein 598 [Source:UniProtKB/Swiss-Prot;Acc:Q86UK7]
ASCIZ		YNL098C	2.87391	ENSP00000256196	RRAS2	DNA Replication, Recombination, and Repair	Ras-related protein R-Ras2 (Ras-like protein TC21) (Teratocarcinoma oncogene). [Source:Uniprot/SWISSPROT;Acc:P62070]
ASCIZ		YNL082W	2.17474	ENSP00000265849	PMS2	Cell Morphology	PMS1 protein homolog 2 (DNA mismatch repair protein PMS2). [Source:Uniprot/SWISSPROT;Acc:P54278]
ASCIZ		YIL023C	2.41035	ENSP00000269187	SLC39A6	Small Molecule Biochemistry	Zinc transporter ZIP6 Precursor (Zrt- and Irt-like protein 6)(ZIP-6)(Solute carrier family 39 member 6)(Estrogen-regulated protein LIV-1) [Source:UniProtKB/Swiss-Prot;Acc:Q13433]
ASCIZ		YHR113W	2.35063	ENSP00000273075	DNPEP	Protein Synthesis	Aspartyl aminopeptidase (EC 3.4.11.21). [Source:Uniprot/SWISSPROT;Acc:Q9ULA0]
ASCIZ		YPL206C	2.27233	ENSP00000284116	GDPD1		glycerophosphodiester phosphodiesterase domain containing 1 [Source:RefSeq_peptide;Acc:NP_872375]
ASCIZ		YDL125C	2.9301	ENSP00000304229	HINT1	Cell Death and Survival	Histidine triad nucleotide-binding protein 1 (Adenosine 5'- monophosphoramidase) (Protein kinase C inhibitor 1) (Protein kinase C- interacting protein 1) (PKCI-1). [Source:Uniprot/SWISSPROT;Acc:P49773]
ASCIZ		YPL206C	2.27233	ENSP00000314124	GDPD3		Glycerophosphodiester phosphodiesterase domain-containing protein 3 (EC 3.1.-.-) [Source:UniProtKB/Swiss-Prot;Acc:Q7L5L3]
ASCIZ		YHR110W	2.0795	ENSP00000330945	TMED9	Cellular Assembly and Organization	Transmembrane emp24 domain containing protein 9 precursor (Glycoprotein 25L2). [Source:Uniprot/SWISSPROT;Acc:Q9BVK6]
ASCIZ		YER169W	2.39121	ENSP00000334181	KDM4D		jumonji domain containing 2D [Source:RefSeq_peptide;Acc:NP_060509]
ASCIZ		YOL002C	2.27662	ENSP00000349616	ADIPOR2	Small Molecule Biochemistry	Adiponectin receptor protein 2 (Progestin and adipoQ receptor family member II). [Source:Uniprot/SWISSPROT;Acc:Q86V24]
ASCIZ		YOR022C	2.02088	ENSP00000358071	SEC23IP	Molecular Transport	SEC23-interacting protein (p125) [Source:UniProtKB/Swiss-Prot;Acc:Q9Y6Y8]
ASCIZ		YEL056W	2.38404	ENSP00000362592	RBBP4	Cell Death and Survival	Histone-binding protein RBBP4 (Retinoblastoma-binding protein 4)(RBBP-4)(Retinoblastoma-binding protein p48)(Chromatin assembly factor 1 subunit C)(CAF-1 subunit C)(Chromatin assembly factor I p48 subunit)(CAF-I 48 kDa subunit)(CAF-I p48)(Nucleosome-remodeling factor subunit RBAP48) [Source:UniProtKB/Swiss-Prot;Acc:Q09028]
ASCIZ		YML022W	2.13138	ENSP00000367615	APRT	Small Molecule Biochemistry	Adenine phosphoribosyltransferase (APRT)(EC 2.4.2.7) [Source:UniProtKB/Swiss-Prot;Acc:P07741]
ASCIZ		YIL131C	2.35955	ENSP00000370256	FOXC1		Forkhead box protein C1 (Forkhead-related protein FKHL7)(Forkhead-related transcription factor 3)(FREAC-3) [Source:UniProtKB/Swiss-Prot;Acc:Q12948]
AURKB	Cell death and survival	YIL114C	3.02245	ENSP00000022615	VDAC3	Molecular Transport	Voltage-dependent anion-selective channel protein 3 (VDAC-3) (hVDAC3) (Outer mitochondrial membrane protein porin 3). [Source:Uniprot/SWISSPROT;Acc:Q9Y277]
AURKB	Cell death and survival	YOR079C	2.5494	ENSP00000031146	SLC39A9		solute carrier family 39 (zinc transporter), member 9 [Source:RefSeq_peptide;Acc:NP_060845]
AURKB	Cell death and survival	YDR125C	3.34474	ENSP00000216327	ABHD4	Small Molecule Biochemistry	Abhydrolase domain containing protein 4. [Source:Uniprot/SWISSPROT;Acc:Q8TB40]
AURKB	Cell death and survival	YAL015C	3.31533	ENSP00000219066	NTHL1		Endonuclease III-like protein 1 (EC 4.2.99.18). [Source:Uniprot/SWISSPROT;Acc:P78549]
AURKB	Cell death and survival	YNL202W	2.75323	ENSP00000219481	DECR2	Lipid Metabolism	Peroxisomal 2,4-dienoyl-CoA reductase (EC 1.3.1.34) (2,4-dienoyl-CoA reductase 2) (pDCR). [Source:Uniprot/SWISSPROT;Acc:Q9NUI1]
AURKB	Cell death and survival	YER053C	3.22085	ENSP00000228318	SLC25A3	Molecular Transport	Phosphate carrier protein, mitochondrial precursor (PTP). [Source:Uniprot/SWISSPROT;Acc:Q00325]
AURKB	Cell death and survival	YJL132W	3.25156	ENSP00000230036	GPLD1	Cell Death and Survival	Phosphatidylinositol-glycan-specific phospholipase D Precursor (PI-G PLD)(EC 3.1.4.50)(Glycoprotein phospholipase D)(Glycosyl-phosphatidylinositol-specific phospholipase D) [Source:UniProtKB/Swiss-Prot;Acc:P80108]
AURKB	Cell death and survival	YCR008W	1.98285	ENSP00000230510	TTK	Cell Death and Survival	Dual specificity protein kinase TTK (EC 2.7.12.1)(Phosphotyrosine picked threonine-protein kinase)(PYT) [Source:UniProtKB/Swiss-Prot;Acc:P33981]
AURKB	Cell death and survival	YEL016C	2.35802	ENSP00000230565	ENPP5		Ectonucleotide pyrophosphatase/phosphodiesterase 5 precursor (EC 3.1.-.-) (E-NPP5) (NPP-5). [Source:Uniprot/SWISSPROT;Acc:Q9UJA9]
AURKB	Cell death and survival	YMR120C	2.83213	ENSP00000236959	ATIC	Nucleic Acid Metabolism	Bifunctional purine biosynthesis protein PURH [Includes: Phosphoribosylaminoimidazolecarboxamide formyltransferase (EC 2.1.2.3) (AICAR transformylase); IMP cyclohydrolase (EC 3.5.4.10) (Inosinicase) (IMP synthetase) (ATIC)]. [Source:Uniprot/SWISSPROT;Acc:P31939]
AURKB	Cell death and survival	YCR011C	2.23074	ENSP00000237612	ABCG2	Cell Death and Survival	ATP-binding cassette sub-family G member 2 (Placenta-specific ATP- binding cassette transporter) (Breast cancer resistance protein) (Mitoxantrone resistance associated protein). [Source:Uniprot/SWISSPROT;Acc:Q9UNQ0]
AURKB	Cell death and survival	YOR291W	2.02732	ENSP00000256031	ATP13A3		Probable cation-transporting ATPase 13A3 (EC 3.6.3.-) (ATPase family homolog up-regulated in senescence cells 1). [Source:Uniprot/SWISSPROT;Acc:Q9H7F0]
AURKB	Cell death and survival	YDR287W	3.13845	ENSP00000256108	IMPA1	Small Molecule Biochemistry	Inositol monophosphatase (EC 3.1.3.25) (IMPase) (IMP) (Inositol-1(or 4)-monophosphatase) (Lithium-sensitive myo-inositol monophosphatase A1). [Source:Uniprot/SWISSPROT;Acc:P29218]
AURKB	Cell death and survival	YER183C	2.50646	ENSP00000258874	MTHFS	Small Molecule Biochemistry	5-formyltetrahydrofolate cyclo-ligase (EC 6.3.3.2) (5,10-methenyl- tetrahydrofolate synthetase) (Methenyl-THF synthetase) (MTHFS). [Source:Uniprot/SWISSPROT;Acc:P49914]
AURKB	Cell death and survival	YMR127C	3.06893	ENSP00000259021	KAT7	Cancer	Histone acetyltransferase MYST2 (MYST protein 2)(EC 2.3.1.48)(MOZ, YBF2/SAS3, SAS2 and TIP60 protein 2)(Histone acetyltransferase binding to ORC1) [Source:UniProtKB/Swiss-Prot;Acc:O95251]
AURKB	Cell death and survival	YHL030W	2.46149	ENSP00000259335	KIAA0368	Protein Synthesis	Proteasome-associated protein ECM29 homolog (Ecm29). [Source:Uniprot/SWISSPROT;Acc:Q5VYK3]
AURKB	Cell death and survival	YLR178C	2.30773	ENSP00000261313	PEBP1	Cell Death and Survival	Phosphatidylethanolamine-binding protein (PEBP) (Prostatic binding protein) (HCNPpp) (Neuropolypeptide h3) (Raf kinase inhibitor protein) (RKIP) [Contains: Hippocampal cholinergic neurostimulating peptide (HCNP)]. [Source:Uniprot/SWISSPROT;Acc:P30086]
AURKB	Cell death and survival	YPL172C	2.34843	ENSP00000261643	COX10	Small Molecule Biochemistry	Protoheme IX farnesyltransferase, mitochondrial precursor (EC 2.5.1.-) (Heme O synthase). [Source:Uniprot/SWISSPROT;Acc:Q12887]
AURKB	Cell death and survival	YAL021C	2.61712	ENSP00000261951	CNOT6		Carbon catabolite repressor protein 4 homolog (EC 3.1.-.-) (Cytoplasmic deadenylase) (CCR4 carbon catabolite repression 4-like) (Nocturnin homolog). [Source:Uniprot/SWISSPROT;Acc:Q9ULM6]
AURKB	Cell death and survival	YIL076W	3.72043	ENSP00000262812	COPE		Coatomer subunit epsilon (Epsilon-coat protein)(Epsilon-COP) [Source:UniProtKB/Swiss-Prot;Acc:O14579]
AURKB	Cell death and survival	YDR001C	3.16056	ENSP00000264029	TREH	Small Molecule Biochemistry	Trehalase precursor (EC 3.2.1.28) (Alpha,alpha-trehalase) (Alpha,alpha-trehalose glucohydrolase). [Source:Uniprot/SWISSPROT;Acc:O43280]
AURKB	Cell death and survival	YER045C	3.49335	ENSP00000264110	ATF2	Cell Death and Survival	Cyclic-AMP-dependent transcription factor ATF-2 (Activating transcription factor 2) (cAMP response element binding protein CRE- BP1) (HB16). [Source:Uniprot/SWISSPROT;Acc:P15336]
AURKB	Cell death and survival	YIL023C	2.9028	ENSP00000269187	SLC39A6	Small Molecule Biochemistry	Zinc transporter ZIP6 Precursor (Zrt- and Irt-like protein 6)(ZIP-6)(Solute carrier family 39 member 6)(Estrogen-regulated protein LIV-1) [Source:UniProtKB/Swiss-Prot;Acc:Q13433]
AURKB	Cell death and survival	YDR093W	2.9959	ENSP00000273859	ATP10D		Potential phospholipid-transporting ATPase VD (EC 3.6.3.1) (ATPVD). [Source:Uniprot/SWISSPROT;Acc:Q9P241]
AURKB	Cell death and survival	YBL099W	2.13948	ENSP00000282050	ATP5A1	Nucleic Acid Metabolism	ATP synthase alpha chain, mitochondrial precursor (EC 3.6.3.14). [Source:Uniprot/SWISSPROT;Acc:P25705]
AURKB	Cell death and survival	YBL067C	2.69228	ENSP00000282344	USP12		Ubiquitin carboxyl-terminal hydrolase 12 (EC 3.1.2.15) (Ubiquitin thiolesterase 12) (Ubiquitin-specific processing protease 12) (Deubiquitinating enzyme 12) (Ubiquitin hydrolyzing enzyme 1). [Source:Uniprot/SWISSPROT;Acc:O75317]
AURKB	Cell death and survival	YJL133W	3.57397	ENSP00000290075	SLC25A37	Molecular Transport	mitochondrial solute carrier protein isoform 1 [Source:RefSeq_peptide;Acc:NP_057696]
AURKB	Cell death and survival	YIL043C	2.50254	ENSP00000299498	CYB5R2		cytochrome b5 reductase b5R.2 isoform 1 [Source:RefSeq_peptide;Acc:NP_057313]
AURKB	Cell death and survival	YJL153C	2.93684	ENSP00000315147	ISYNA1		myo-inositol 1-phosphate synthase A1 [Source:RefSeq_peptide;Acc:NP_057452]
AURKB	Cell death and survival	YEL071W	2.25922	ENSP00000315351	D2HGDH	Protein Synthesis	MGC25181 protein. [Source:Uniprot/SPTREMBL;Acc:Q6IQ24]
AURKB	Cell death and survival	YMR036C	2.31956	ENSP00000321656	CDC25C	Cell Death and Survival	M-phase inducer phosphatase 3 (EC 3.1.3.48)(Dual specificity phosphatase Cdc25C) [Source:UniProtKB/Swiss-Prot;Acc:P30307]
AURKB	Cell death and survival	YPL134C	2.50621	ENSP00000329452	SLC25A21	Molecular Transport	Mitochondrial 2-oxodicarboxylate carrier. [Source:Uniprot/SWISSPROT;Acc:Q9BQT8]
AURKB	Cell death and survival	YHR207C	3.77073	ENSP00000331557	SMYD3		SET and MYND domain-containing protein 3 (EC 2.1.1.43)(Zinc finger MYND domain-containing protein 1) [Source:UniProtKB/Swiss-Prot;Acc:Q9H7B4]
AURKB	Cell death and survival	YBL002W	2.08981	ENSP00000336417	HIST2HSBE		Histone H2B.q (H2B/q) (H2B-GL105). [Source:Uniprot/SWISSPROT;Acc:Q16778]
AURKB	Cell death and survival	YOR317W	3.12358	ENSP00000339787	ACSL4	Cell Death and Survival	Long-chain-fatty-acid--CoA ligase 4 (EC 6.2.1.3) (Long-chain acyl-CoA synthetase 4) (LACS 4). [Source:Uniprot/SWISSPROT;Acc:O60488]
AURKB	Cell death and survival	YIL009W	2.58542	ENSP00000339787	ACSL4	Cell Death and Survival	Long-chain-fatty-acid--CoA ligase 4 (EC 6.2.1.3) (Long-chain acyl-CoA synthetase 4) (LACS 4). [Source:Uniprot/SWISSPROT;Acc:O60488]
AURKB	Cell death and survival	YBL002W	2.08981	ENSP00000342886	HIST1H2BJ/HIST1H2BK		Histone H2B.a/g/h/k/l (H2B.1 A) (H2B/a) (H2B/g) (H2B/h) (H2B/k) (H2B/l). [Source:Uniprot/SWISSPROT;Acc:P62807]
AURKB	Cell death and survival	YLR089C	3.83939	ENSP00000345282	GPT2		alanine aminotransferase 2 [Source:RefSeq_peptide;Acc:NP_597700]
AURKB	Cell death and survival	YPL164C	2.59166	ENSP00000348020	MLH3	Cell Cycle	DNA mismatch repair protein Mlh3 (MutL protein homolog 3). [Source:Uniprot/SWISSPROT;Acc:Q9UHC1]
AURKB	Cell death and survival	YJR035W	3.53868	ENSP00000348089	ERCC6	Cell Death and Survival	DNA excision repair protein ERCC-6 (EC 3.6.1.-)(ATP-dependent helicase ERCC6)(Cockayne syndrome protein CSB) [Source:UniProtKB/Swiss-Prot;Acc:Q03468]
AURKB	Cell death and survival	YLR168C	3.74653	ENSP00000348206	SLMO2		Protein slowmo homolog 2 [Source:UniProtKB/Swiss-Prot;Acc:Q9Y3B1]
AURKB	Cell death and survival	YML068W	3.06041	ENSP00000348462	RNF14		RING finger protein 14 (Androgen receptor-associated protein 54) (Triad2 protein) (HFB30). [Source:Uniprot/SWISSPROT;Acc:Q9UBS8]
AURKB	Cell death and survival	YBL002W	2.08981	ENSP00000348924	HIST2HSBE		histone 2, H2bf [Source:RefSeq_peptide;Acc:NP_001019770]
AURKB	Cell death and survival	YJL210W	2.07283	ENSP00000349543	PEX2	Cellular Assembly and Organization	Peroxisome biogenesis factor 2 [Source:UniProtKB/Swiss-Prot;Acc:P28328]
AURKB	Cell death and survival	YAL042W	2.08054	ENSP00000349970	ERGIC3		Serologically defined breast cancer antigen NY-BR-84. [Source:Uniprot/SWISSPROT;Acc:Q9Y282]
AURKB	Cell death and survival	YAL019W	2.11072	ENSP00000351947	SMARCAD1	Cancer	SWI/SNF-related, matrix associated, actin-dependent regulator of chromatin subfamily A containing DEAD/H box 1 (Helicase 1) (hHEL1). [Source:Uniprot/SWISSPROT;Acc:Q9H4L7]
AURKB	Cell death and survival	YPL207W	2.14168	ENSP00000352645	TYW1	Cancer	tRNA wybutosine-synthesizing protein 1 homolog (tRNA-yW-synthesizing protein)(Radical S-adenosyl methionine and flavodoxin domain-containing protein 1) [Source:UniProtKB/Swiss-Prot;Acc:Q9NV66]
AURKB	Cell death and survival	YNL175C	2.19496	ENSP00000352956	RBM23	Cancer	Probable RNA-binding protein 23 (RNA-binding motif protein 23)(RNA-binding region-containing protein 4)(Splicing factor SF2) [Source:UniProtKB/Swiss-Prot;Acc:Q86U06]
AURKB	Cell death and survival	YBL002W	2.08981	ENSP00000353074	HIST1H2BC		Histone H2B.a/g/h/k/l (H2B.1 A) (H2B/a) (H2B/g) (H2B/h) (H2B/k) (H2B/l). [Source:Uniprot/SWISSPROT;Acc:P62807]
AURKB	Cell death and survival	YOR085W	2.12642	ENSP00000354649	MAGT1	Molecular Transport	Magnesium transporter protein 1 Precursor (MagT1)(Implantation-associated protein)(IAP) [Source:UniProtKB/Swiss-Prot;Acc:Q9H0U3]
AURKB	Cell death and survival	YPL120W	2.84503	ENSP00000355231	BECN1	Cell Death and Survival	Beclin-1 (Coiled-coil myosin-like BCL2-interacting protein)(Protein GT197) [Source:UniProtKB/Swiss-Prot;Acc:Q14457]
AURKB	Cell death and survival	YAR018C	3.43333	ENSP00000355966	NEK2	Cell Death and Survival	Serine/threonine-protein kinase Nek2 (EC 2.7.11.1)(NimA-related protein kinase 2)(NimA-like protein kinase 1)(HSPK 21) [Source:UniProtKB/Swiss-Prot;Acc:P51955]
AURKB	Cell death and survival	YJL155C	3.56304	ENSP00000356047	PFKFB2	Cell Death and Survival	6-phosphofructo-2-kinase/fructose-2,6-biphosphatase 2 (PFK-2/FBPase-2)(6PF-2-K/Fru-2,6-P2ASE heart-type isozyme) [Includes 6-phosphofructo-2-kinase(EC 2.7.1.105);Fructose-2,6-bisphosphatase(EC 3.1.3.46)] [Source:UniProtKB/Swiss-Prot;Acc:O60825]
AURKB	Cell death and survival	YOR285W	2.06591	ENSP00000357004
AURKB	Cell death and survival	YOR367W	3.60395	ENSP00000357076	TAGLN2	Cell Death and Survival	Transgelin-2 (SM22-alpha homolog) [Source:UniProtKB/Swiss-Prot;Acc:P37802]
AURKB	Cell death and survival	YBR180W	2.2733	ENSP00000358515	SLC22A15		solute carrier family 22, member 15 [Source:HGNC Symbol;Acc:20301]
AURKB	Cell death and survival	YNL141W	2.05994	ENSP00000361965	ADA	Nucleic Acid Metabolism	Adenosine deaminase (EC 3.5.4.4)(Adenosine aminohydrolase) [Source:UniProtKB/Swiss-Prot;Acc:P00813]
AURKB	Cell death and survival	YDL074C	2.47851	ENSP00000363952	RNF20	Protein Synthesis	E3 ubiquitin-protein ligase BRE1A (BRE1-A)(hBRE1)(EC 6.3.2.-)(RING finger protein 20) [Source:UniProtKB/Swiss-Prot;Acc:Q5VTR2]
AURKB	Cell death and survival	YPR002W	3.24451	ENSP00000366682	IRG1		immunoresponsive 1 homolog (mouse) [Source:HGNC Symbol;Acc:33904]
AURKB	Cell death and survival	YBL002W	2.08981	ENSP00000366962	HISTSH2BE		Histone H2B type 1-C/E/F/G/I (H2B.a/g/h/k/l)(H2B.1 A)(H2B/a)(H2B/g)(H2B/h)(H2B/k)(H2B/l) [Source:UniProtKB/Swiss-Prot;Acc:P62807]
AURKB	Cell death and survival	YPL060W	2.1488	ENSP00000367637	MRS2		Magnesium transporter MRS2 homolog, mitochondrial Precursor (MRS2-like protein) [Source:UniProtKB/Swiss-Prot;Acc:Q9HD23]
AURKB	Cell death and survival	YJR008W	2.2841	ENSP00000368691	MEMO1		Protein MEMO1 (Mediator of ErbB2-driven cell motility 1)(Protein memo)(Hepatitis C virus NS5A-transactivated protein 7)(HCV NS5A-transactivated protein 7)(C21orf19-like protein) [Source:UniProtKB/Swiss-Prot;Acc:Q9Y316]
AURKB	Cell death and survival	YLR017W	2.20893	ENSP00000369519	MTAP	Nucleic Acid Metabolism	S-methyl-5'-thioadenosine phosphorylase (EC 2.4.2.28)(5'-methylthioadenosine phosphorylase)(MTA phosphorylase)(MTAPase) [Source:UniProtKB/Swiss-Prot;Acc:Q13126]
AURKB	Cell death and survival	YML097C	2.18351	ENSP00000370208	KCTD7		RAB guanine nucleotide exchange factor (GEF) 1 [Source:RefSeq peptide;Acc:NP_055319]
AURKB	Cell death and survival	YNL068C	3.87618	ENSP00000370256	FOXC1		Forkhead box protein C1 (Forkhead-related protein FKHL7)(Forkhead-related transcription factor 3)(FREAC-3) [Source:UniProtKB/Swiss-Prot;Acc:Q12948]
AURKB	Cell death and survival	YNL135C	3.48028	ENSP00000371161	FKBP1A		Peptidyl-prolyl cis-trans isomerase FKBP1A (PPIase FKBP1A)(EC 5.2.1.8)(FK506-binding protein 1A)(FKBP-1A)(Rotamase)(Immunophilin FKBP12)(12 kDa FKBP)(FKBP-12) [Source:UniProtKB/Swiss-Prot;Acc:P62942]
AURKB	Cell death and survival	YJR126C	3.29442	ENSP00000374374	FOLH1B		Prostate-specific membrane antigen-like protein (Cell growth-inhibiting gene 26 protein) [Source:UniProtKB/Swiss-Prot;Acc:Q9HBA9]
AURKB	Cell death and survival	YJL177W	3.43701	ENSP00000375160	RPL17		60S ribosomal protein L17 (60S ribosomal protein L23)(PD-1) [Source:UniProtKB/Swiss-Prot;Acc:P18621]
AURKB	Cell death and survival	YLR107W	1.97971	ENSP00000375401	REXO1L2P		Putative exonuclease GOR-like protein (EC 3.1.-.-)(RNA exonuclease 1 homolog-like 2) [Source:UniProtKB/Swiss-Prot;Acc:A0PJM3]
AURKB	Cell death and survival	YER171W	2.14577	ENSP00000375809	ERCC2	Cell Death and Survival	TFIIH basal transcription factor complex helicase subunit (EC 3.6.1.-)(DNA-repair protein complementing XP-D cells)(Xeroderma pigmentosum group D-complementing protein)(CXPD)(DNA excision repair protein ERCC-2) [Source:UniProtKB/Swiss-Prot;Acc:P18074]
AURKB	Cell death and survival	YER148W	3.83867	ENSP00000375942	TBP	Cell Death and Survival	TATA-box-binding protein (TATA-box factor)(TATA-binding factor)(TATA sequence-binding protein)(Transcription initiation factor TFIID TBP subunit) [Source:UniProtKB/Swiss-Prot;Acc:P20226]
AURKB	Cell death and survival	YNL087W	2.88328	ENSP00000377612	ESYT1		Extended-synaptotagmin-1 (E-Syt1)(Membrane-bound C2 domain-containing protein)(Protein FAM62A) [Source:UniProtKB/Swiss-Prot;Acc:Q9BSJ8]
AURKB	Cell death and survival	YMR034C	3.06474	ENSP00000377626	SLC10A7		Sodium/bile acid cotransporter 7 (Na(+)/bile acid cotransporter 7)(Solute carrier family 10 member 7) [Source:UniProtKB/Swiss-Prot;Acc:Q0GE19]
AURKB	Cell death and survival	YNL154C	2.19732	ENSP00000378807	CSNK1G3		Casein kinase I isoform gamma-3 (CKI-gamma 3)(EC 2.7.11.1) [Source:UniProtKB/Swiss-Prot;Acc:Q9Y6M4]
AURKB	Cell death and survival	YJR097W	2.82823	ENSP00000379279	DNAJC24		DnaJ homolog subfamily C member 24 [Source:UniProtKB/Swiss-Prot;Acc:Q6P3W2]
AURKB	Cell death and survival	YDR335W	2.57077	ENSP00000381779	XPO5	Molecular Transport	Exportin-5 (Exp5)(Ran-binding protein 21) [Source:UniProtKB/Swiss-Prot;Acc:Q9HAV4]
AURKB	Cell death and survival	YEL071W	2.25922	ENSP00000383580	D2HGDH	Protein Synthesis	Uncharacterized protein ENSP00000383579 [Source:UniProtKB/TrEMBL;Acc:A8MWV4]
AURKB	Cell death and survival	YBL104C	3.52761	ENSP00000384088	MIOS		WD repeat-containing protein mio [Source:UniProtKB/Swiss-Prot;Acc:Q9NXC5]
AURKB	Cell death and survival	YJL177W	3.43701	ENSP00000386061	RPL17		ribosomal protein L17-like [Source:RefSeq peptide;Acc:NP_001087202]
AURKB	Cell death and survival	YDL201W	3.4189	ENSP00000386157	METTL1		tRNA (guanine-N(7)-)-methyltransferase (EC 2.1.1.33)(tRNA(m7G46)-methyltransferase)(Methyltransferase-like protein 1) [Source:UniProtKB/Swiss-Prot;Acc:Q9UBP6]
BRSK2	Post-Translational Modification	YDL079C	2.20806	ENSP00000222330	GSK3A	Molecular Transport	Glycogen synthase kinase-3 alpha (EC 2.7.1.37) (GSK-3 alpha). [Source:Uniprot/SWISSPROT;Acc:P49840]
BRSK2	Post-Translational Modification	YOL058W	2.20888	ENSP00000253004	ASS1	Small Molecule Biochemistry	Argininosuccinate synthase (EC 6.3.4.5) (Citrulline--aspartate ligase). [Source:Uniprot/SWISSPROT;Acc:P00966]
BRSK2	Post-Translational Modification	YBL017C	2.18006	ENSP00000256637	SORT1	Cell Death and Survival	Sortilin precursor (Glycoprotein 95) (Gp95) (Neurotensin receptor 3) (NT3) (100 kDa NT receptor). [Source:Uniprot/SWISSPROT;Acc:Q99523]
BRSK2	Post-Translational Modification	YJL024C	2.57055	ENSP00000325369	AP3S1		Adapter-related protein complex 3 sigma 1 subunit (Sigma-adaptin 3a) (AP-3 complex sigma-3A subunit) (Sigma-3A-adaptin) (Clathrin- associated/assembly/adapter protein, small 3). [Source:Uniprot/SWISSPROT;Acc:Q92572]
BRSK2	Post-Translational Modification	YMR104C	2.52693	ENSP00000340608	SGK2	Cellular Assembly and Organization	Serine/threonine-protein kinase Sgk2 (EC 2.7.1.37) (Serum/glucocorticoid regulated kinase 2). [Source:Uniprot/SWISSPROT;Acc:Q9HBY8]
BRSK2	Post-Translational Modification	YLL039C	2.11481	ENSP00000344818	UBC		Ubiquitin. [Source:Uniprot/SWISSPROT;Acc:P62988]
BRSK2	Post-Translational Modification	YPL270W	2.33351	ENSP00000355637	ABCB10	Small Molecule Biochemistry	ATP-binding cassette sub-family B member 10, mitochondrial Precursor (ATP-binding cassette transporter 10)(ABC transporter 10 protein)(Mitochondrial ATP-binding cassette 2)(M-ABC2) [Source:UniProtKB/Swiss-Prot;Acc:Q9NRK6]
BRSK2	Post-Translational Modification	YBR210W	3.00039	ENSP00000355825	CNIH4		Protein cornichon homolog 4 [Source:UniProtKB/Swiss-Prot;Acc:Q9P003]
BRSK2	Post-Translational Modification	YNL092W	2.01848	ENSP00000366030	C9orf41		UPF0586 protein C9orf41 [Source:UniProtKB/Swiss-Prot;Acc:Q8N4J0]
BRD4	Cell death and survival	YPL154C	2.86877	ENSP00000236671	CTSD	Cell Death and Survival	Cathepsin D precursor (EC 3.4.23.5) [Contains: Cathepsin D light chain; Cathepsin D heavy chain]. [Source:Uniprot/SWISSPROT;Acc:P07339]
BRD4	Cell death and survival	YLR019W	2.10437	ENSP00000260327	CTDSPL2		CTD small phosphatase-like protein 2 (CTDSP-like 2)(EC 3.1.3.-) [Source:UniProtKB/Swiss-Prot;Acc:Q05D32]
BRD4	Cell death and survival	YOR330C	2.62209	ENSP00000268124	POLG	DNA Replication, Recombination, and Repair	DNA polymerase gamma subunit 1 (EC 2.7.7.7) (Mitochondrial DNA polymerase catalytic subunit) (PolG-alpha). [Source:Uniprot/SWISSPROT;Acc:P54098]
BRD4	Cell death and survival	YBR105C	2.1124	ENSP00000268719	GID4		Uncharacterized protein C17orf39 [Source:UniProtKB/Swiss-Prot;Acc:Q8IVV7]
BRD4	Cell death and survival	YAL002W	3.5857	ENSP00000287546	VPS8		Vacuolar protein sorting-associated protein 8 homolog [Source:UniProtKB/Swiss-Prot;Acc:Q8N3P4]
BRD4	Cell death and survival	YIL066C	2.04148	ENSP00000300738	RRM1	Cell Death and Survival	Ribonucleoside-diphosphate reductase large subunit (EC 1.17.4.1) (Ribonucleoside-diphosphate reductase M1 subunit) (Ribonucleotide reductase large chain). [Source:Uniprot/SWISSPROT;Acc:P23921]
BRD4	Cell death and survival	YDR080W	2.44214	ENSP00000309457	VPS41	Cellular Assembly and Organization	Vacuolar assembly protein VPS41 homolog (S53). [Source:Uniprot/SWISSPROT;Acc:P49754]
BRD4	Cell death and survival	YDR110W	2.03493	ENSP00000328017	KRBA2		KRAB-A domain-containing protein 2 [Source:Uniprot/SWISSPROT;Acc:Q6ZNG9]
BRD4	Cell death and survival	YDL236W	2.663	ENSP00000330918	PGP		PREDICTED: similar to RIKEN cDNA 1700012G19 [Source:RefSeq_peptide_predicted;Acc:XP_208887]
BRD4	Cell death and survival	YBR229C	2.02747	ENSP00000340466	GANAB	Small Molecule Biochemistry	Neutral alpha-glucosidase AB Precursor (EC 3.2.1.84)(Glucosidase II subunit alpha)(Alpha-glucosidase 2) [Source:UniProtKB/Swiss-Prot;Acc:Q14697]
BRD4	Cell death and survival	YBL056W	1.99648	ENSP00000342778	PPM1G	Cell Death and Survival	Protein phosphatase 2C gamma isoform (EC 3.1.3.16) (PP2C-gamma) (Protein phosphatase magnesium-dependent 1 gamma) (Protein phosphatase 1C). [Source:Uniprot/SWISSPROT;Acc:O15355]
BRD4	Cell death and survival	YJR040W	2.05594	ENSP00000365256	CLCN5	Molecular Transport	Chloride channel protein 5 (ClC-5) [Source:UniProtKB/Swiss-Prot;Acc:P51795]
BRD4	Cell death and survival	YNL239W	1.97589	ENSP00000378296	BLMH	Small Molecule Biochemistry	Bleomycin hydrolase (BLM hydrolase)(BMH)(BH)(EC 3.4.22.40) [Source:UniProtKB/Swiss-Prot;Acc:Q13867]
BRD4	Cell death and survival	YPL074W	1.96025	ENSP00000378924	FIGNL1	DNA Replication, Recombination, and Repair	Fidgetin-like protein 1 (EC 3.6.4.-) [Source:UniProtKB/Swiss-Prot;Acc:Q6PIW4]
CKMT1A		YNL129W	3.17581	ENSP00000168977	NMRK2		Nicotinamide riboside kinase 2 (EC 2.7.1.-) (Integrin beta-1 binding protein 3) (Muscle integrin-binding protein) (MIBP). [Source:Uniprot/SWISSPROT;Acc:Q9NPI5]
CKMT1A		YNL273W	2.68665	ENSP00000229201	TIMELESS	DNA Replication, Recombination, and Repair	Timeless homolog (hTIM). [Source:Uniprot/SWISSPROT;Acc:Q9UNS1]
CKMT1A		YAL030W	2.55813	ENSP00000236192	VAMP4	Small Molecule Biochemistry	Vesicle-associated membrane protein 4 (VAMP-4). [Source:Uniprot/SWISSPROT;Acc:O75379]
CKMT1A		YDR083W	1.97705	ENSP00000254605	RRP8		Cerebral protein 1. [Source:Uniprot/SWISSPROT;Acc:O43159]
CKMT1A		YER057C	2.16769	ENSP00000254878	HRSP12	Protein Synthesis	Ribonuclease UK114 (EC 3.1.-.-) (14.5 kDa translational inhibitor protein) (p14.5) (UK114 antigen homolog). [Source:Uniprot/SWISSPROT;Acc:P52758]
CKMT1A		YPL273W	2.16651	ENSP00000255192	BHMT2	Small Molecule Biochemistry	Betaine--homocysteine S-methyltransferase 2 (EC 2.1.1.5) [Source:UniProtKB/Swiss-Prot;Acc:Q9H2M3]
CKMT1A		YJR073C	2.3694	ENSP00000255389	PEMT	Molecular Transport	Phosphatidylethanolamine N-methyltransferase (EC 2.1.1.17) (PEAMT) (PEMT) (PEMT2). [Source:Uniprot/SWISSPROT;Acc:Q9UBM1]
CKMT1A		YER157W	3.11545	ENSP00000258654	COG3	Protein Synthesis	Conserved oligomeric Golgi complex subunit 3 (COG complex subunit 3)(Component of oligomeric golgi complex 3)(Vesicle-docking protein SEC34 homolog)(p94) [Source:UniProtKB/Swiss-Prot;Acc:Q96JB2]
CKMT1A		YMR223W	2.14607	ENSP00000261497	USP22	Cell Death and Survival	Ubiquitin carboxyl-terminal hydrolase 22 (EC 3.1.2.15) (Ubiquitin thiolesterase 22) (Ubiquitin-specific processing protease 22) (Deubiquitinating enzyme 22). [Source:Uniprot/SWISSPROT;Acc:Q9UPT9]
CKMT1A		YIL076W	2.50949	ENSP00000262812	COPE		Coatomer subunit epsilon (Epsilon-coat protein)(Epsilon-COP) [Source:UniProtKB/Swiss-Prot;Acc:O14579]
CKMT1A		YJL106W	2.25064	ENSP00000263043	ICK	Post-Translational Modification	Serine/threonine-protein kinase ICK (EC 2.7.11.22)(Intestinal cell kinase)(hICK)(MAK-related kinase)(MRK)(Laryngeal cancer kinase 2)(LCK2) [Source:UniProtKB/Swiss-Prot;Acc:Q9UPZ9]
CKMT1A		YHL002W	2.15158	ENSP00000263904	STAM2		Signal transducing adapter molecule 2 (STAM-2). [Source:Uniprot/SWISSPROT;Acc:O75886]
CKMT1A		YEL013W	3.26312	ENSP00000263946	PKP1		Plakophilin-1 (Band-6 protein)(B6P) [Source:UniProtKB/Swiss-Prot;Acc:Q13835]
CKMT1A		YBL080C	2.7959	ENSP00000263985	PET112	Protein Synthesis	Probable glutamyl-tRNA(Gln) amidotransferase subunit B, mitochondrial precursor (EC 6.3.5.-) (Glu-ADT subunit B) (Cytochrome oxidase assembly factor PET112 homolog). [Source:Uniprot/SWISSPROT;Acc:O75879]
CKMT1A		YBR048W	2.26196	ENSP00000270625	RPS11	Cancer	40S ribosomal protein S11. [Source:Uniprot/SWISSPROT;Acc:P62280]
CKMT1A		YOR089C	3.41248	ENSP00000273047	RAB5A	Cell Death and Survival	Ras-related protein Rab-5A. [Source:Uniprot/SWISSPROT;Acc:P20339]
CKMT1A		YPL273W	2.16651	ENSP00000274353	BHMT	Nucleic Acid Metabolism	Betaine--homocysteine S-methyltransferase 1 (EC 2.1.1.5) [Source:UniProtKB/Swiss-Prot;Acc:Q93088]
CKMT1A		YAL062W	2.79381	ENSP00000277865	GLUD1	Cell Death and Survival	Glutamate dehydrogenase 1, mitochondrial precursor (EC 1.4.1.3) (GDH). [Source:Uniprot/SWISSPROT;Acc:P00367]
CKMT1A		YJL053W	2.52184	ENSP00000281187	VPS26B		Vacuolar protein sorting-associated protein 26B (Vesicle protein sorting 26B) [Source:UniProtKB/Swiss-Prot;Acc:Q4G0F5]
CKMT1A		YML014W	2.32568	ENSP00000303257	KIAA1456		Putative methyltransferase KIAA1456 (EC 2.1.1.-) [Source:UniProtKB/Swiss-Prot;Acc:Q9P272]
CKMT1A		YEL024W	3.87244	ENSP00000306397	UQCRFS1	Cell Death and Survival	Ubiquinol-cytochrome c reductase iron-sulfur subunit, mitochondrial precursor (EC 1.10.2.2) (Rieske iron-sulfur protein) (RISP). [Source:Uniprot/SWISSPROT;Acc:P47985]
CKMT1A		YML060W	3.20697	ENSP00000306561	OGG1	Cell Death and Survival	N-glycosylase/DNA lyase [Includes: 8-oxoguanine DNA glycosylase (EC 3.2.2.-); DNA-(apurinic or apyrimidinic site) lyase (EC 4.2.99.18) (AP lyase)]. [Source:Uniprot/SWISSPROT;Acc:O15527]
CKMT1A		YIL110W	2.21878	ENSP00000307077	METTL18		UPF0558 protein C1orf156 (Arsenic-transactivated protein 2)(AsTP2) [Source:UniProtKB/Swiss-Prot;Acc:O95568]
CKMT1A		YMR274C	2.28331	ENSP00000309163	RCE1	Protein Synthesis	CAAX prenyl protease 2 (EC 3.4.22.-) (Prenyl protein-specific endoprotease 2) (Farnesylated proteins-converting enzyme 2) (FACE-2) (hRCE1). [Source:Uniprot/SWISSPROT;Acc:Q9Y256]
CKMT1A		YDR080W	2.04858	ENSP00000309457	VPS41	Cellular Assembly and Organization	Vacuolar assembly protein VPS41 homolog (S53). [Source:Uniprot/SWISSPROT;Acc:P49754]
CKMT1A		YJL124C	2.87216	ENSP00000310596	LSM12		U6 snRNA-associated Sm-like protein LSm1 (Small nuclear ribonuclear CaSm) (Cancer-associated Sm-like). [Source:Uniprot/SWISSPROT;Acc:O15116]
CKMT1A		YPL147W	2.74622	ENSP00000310688	ABCD2	Lipid Metabolism	ATP-binding cassette sub-family D member 2 (Adrenoleukodystrophy- related protein) (hALDR) (Adrenoleukodystrophy-like 1). [Source:Uniprot/SWISSPROT;Acc:Q9UBJ2]
CKMT1A		YOR156C	2.72041	ENSP00000311778	ZMIZ2		Zinc finger MIZ domain-containing protein 2 (PIAS-like protein Zimp7) [Source:UniProtKB/Swiss-Prot;Acc:Q8NF64]
CKMT1A		YBR006W	2.11618	ENSP00000314649	ALDH5A1	Lipid Metabolism	Succinate semialdehyde dehydrogenase, mitochondrial precursor (EC 1.2.1.24) (NAD(+)-dependent succinic semialdehyde dehydrogenase). [Source:Uniprot/SWISSPROT;Acc:P51649]
CKMT1A		YLR114C	2.83534	ENSP00000315568	AVL9		Uncharacterized protein KIAA0241 [Source:UniProtKB/Swiss-Prot;Acc:Q8NBF6]
CKMT1A		YLL019C	3.12216	ENSP00000316948	CLK4	Cancer	Dual specificity protein kinase CLK4 (EC 2.7.1.37) (EC 2.7.1.112) (CDC-like kinase 4). [Source:Uniprot/SWISSPROT;Acc:Q9HAZ1]
CKMT1A		YLR058C	3.29812	ENSP00000318868	SHMT1	Small Molecule Biochemistry	Serine hydroxymethyltransferase, cytosolic (EC 2.1.2.1) (Serine methylase) (Glycine hydroxymethyltransferase) (SHMT). [Source:Uniprot/SWISSPROT;Acc:P34896]
CKMT1A		YAL062W	2.79381	ENSP00000327589	GLUD2	Small Molecule Biochemistry	Glutamate dehydrogenase 2, mitochondrial precursor (EC 1.4.1.3) (GDH). [Source:Uniprot/SWISSPROT;Acc:P49448]
CKMT1A		YDL236W	2.11738	ENSP00000330918	PGP		PREDICTED: similar to RIKEN cDNA 1700012G19 [Source:RefSeq_peptide_predicted;Acc:XP_208887]
CKMT1A		YMR216C	3.50791	ENSP00000337679	SRPK2		Serine/threonine-protein kinase SPRK2 (EC 2.7.1.37) (Serine/arginine- rich protein specific kinase 2) (SR-protein-specific kinase 2) (SFRS protein kinase 2). [Source:Uniprot/SWISSPROT;Acc:P78362]
CKMT1A		YMR110C	1.97189	ENSP00000345774	ALDH3A2	Small Molecule Biochemistry	Fatty aldehyde dehydrogenase (EC 1.2.1.3) (Aldehyde dehydrogenase, microsomal) (Aldehyde dehydrogenase family 3 member A2). [Source:Uniprot/SWISSPROT;Acc:P51648]
CKMT1A		YHR076W	2.79177	ENSP00000346255	PPTC7	Cancer	Protein phosphatase PTC7 homolog (EC 3.1.3.16)(T-cell activation protein phosphatase 2C)(TA-PP2C)(T-cell activation protein phosphatase 2C-like) [Source:UniProtKB/Swiss-Prot;Acc:Q8NI37]
CKMT1A		YBR175W	2.21713	ENSP00000351446	WDR5	Cellular Assembly and Organization	WD-repeat protein 5 (BMP2-induced 3-kb gene protein). [Source:Uniprot/SWISSPROT;Acc:P61964]
CKMT1A		YPL207W	2.58735	ENSP00000352645	TYW1	Cancer	tRNA wybutosine-synthesizing protein 1 homolog (tRNA-yW-synthesizing protein)(Radical S-adenosyl methionine and flavodoxin domain-containing protein 1) [Source:UniProtKB/Swiss-Prot;Acc:Q9NV66]
CKMT1A		YDL149W	2.60347	ENSP00000355173	ATG9A	Cellular Assembly and Organization	Autophagy-related protein 9A (APG9-like 1) [Source:UniProtKB/Swiss-Prot;Acc:Q7Z3C6]
CKMT1A		YCL035C	2.58263	ENSP00000356410	GLRX2	Small Molecule Biochemistry	Glutaredoxin-2, mitochondrial Precursor [Source:UniProtKB/Swiss-Prot;Acc:Q9NS18]
CKMT1A		YOR022C	2.28339	ENSP00000358071	SEC23IP	Molecular Transport	SEC23-interacting protein (p125) [Source:UniProtKB/Swiss-Prot;Acc:Q9Y6Y8]
CKMT1A		YOR273C	2.56934	ENSP00000358515	SLC22A15		solute carrier family 22, member 15 [Source:HGNC Symbol;Acc:20301]
CKMT1A		YLR172C	2.43969	ENSP00000359123	DPH5		Diphthine synthase (EC 2.1.1.98)(Diphthamide biosynthesis methyltransferase) [Source:UniProtKB/Swiss-Prot;Acc:Q9H2P9]
CKMT1A		YOR323C	2.09705	ENSP00000360268	ALDH18A1	Small Molecule Biochemistry	Delta-1-pyrroline-5-carboxylate synthetase (P5CS)(Aldehyde dehydrogenase family 18 member A1) [Includes Glutamate 5-kinase(GK)(EC 2.7.2.11)(Gamma-glutamyl kinase);Gamma-glutamyl phosphate reductase(GPR)(EC 1.2.1.41)(Glutamate-5-semialdehyde dehydrogenase)(Glutamyl-gamma-semialdehyde dehydrogenase)] [Source:UniProtKB/Swiss-Prot;Acc:P54886]
CKMT1A		YPL037C	2.00634	ENSP00000360658	BTF3L4		Transcription factor BTF3 homolog 4 (Basic transcription factor 3-like 4) [Source:UniProtKB/Swiss-Prot;Acc:Q96K17]
CKMT1A		YNL141W	2.48929	ENSP00000361965	ADA	Nucleic Acid Metabolism	Adenosine deaminase (EC 3.5.4.4)(Adenosine aminohydrolase) [Source:UniProtKB/Swiss-Prot;Acc:P00813]
CKMT1A		YMR230W	2.71157	ENSP00000363169	PRS10		40S ribosomal protein S10 [Source:UniProtKB/Swiss-Prot;Acc:P46783]
CKMT1A		YMR020W	2.67918	ENSP00000367309	MAOB	Cell Death and Survival	Amine oxidase [flavin-containing] B (EC 1.4.3.4)(Monoamine oxidase type B)(MAO-B) [Source:UniProtKB/Swiss-Prot;Acc:P27338]
CKMT1A		YPL015C	2.27597	ENSP00000372191	SIRT3	Cell Death and Survival	NAD-dependent deacetylase sirtuin-3, mitochondrial Precursor (EC 3.5.1.-)(SIR2-like protein 3)(hSIRT3) [Source:UniProtKB/Swiss-Prot;Acc:Q9NTG7]
CKMT1A		YMR247C	2.00737	ENSP00000373846	LTN1		Zinc finger protein 294 (RING finger protein 160) [Source:UniProtKB/Swiss-Prot;Acc:O94822]
CKMT1A		YLR032W	2.05173	ENSP00000376644	HLTF		Helicase-like transcription factor (EC 3.6.1.-)(SWI/SNF-related matrix-associated actin-dependent regulator of chromatin subfamily A member 3)(Sucrose nonfermenting protein 2-like 3)(DNA-binding protein/plasminogen activator inhibitor 1 regulator)(HIP116)(RING finger protein 80) [Source:UniProtKB/Swiss-Prot;Acc:Q14527]
CKMT1A		YML123C	2.19884	ENSP00000377779	SV2B		Synaptic vesicle glycoprotein 2B [Source:UniProtKB/Swiss-Prot;Acc:Q7L1I2]
CKMT1A		YNL154C	3.29469	ENSP00000378807	CSNK1G3		Casein kinase I isoform gamma-3 (CKI-gamma 3)(EC 2.7.11.1) [Source:UniProtKB/Swiss-Prot;Acc:Q9Y6M4]
CKMT1A		YER123W	2.36957	ENSP00000378807	CSNK1G3		Casein kinase I isoform gamma-3 (CKI-gamma 3)(EC 2.7.11.1) [Source:UniProtKB/Swiss-Prot;Acc:Q9Y6M4]
CKMT1A		YMR002W	4.12168	ENSP00000378812	CHCHD2		Coiled-coil-helix-coiled-coil-helix domain-containing protein 2, mitochondrial Precursor (HCV NS2 trans-regulated protein)(NS2TP)(Aging-associated gene 10 protein) [Source:UniProtKB/Swiss-Prot;Acc:Q9Y6H1]
CKMT1A		YMR022W	2.58825	ENSP00000381001	UBE2G2		Ubiquitin-conjugating enzyme E2 G2 (EC 6.3.2.19)(Ubiquitin-protein ligase G2)(Ubiquitin carrier protein G2) [Source:UniProtKB/Swiss-Prot;Acc:P60604]
COL4A3BP	Post-Translational Modification	YBR084W	2.31646	ENSP00000216605	MTHFD1	Small Molecule Biochemistry	C-1-tetrahydrofolate synthase, cytoplasmic (C1-THF synthase) [Includes: Methylenetetrahydrofolate dehydrogenase (EC 1.5.1.5); Methenyltetrahydrofolate cyclohydrolase (EC 3.5.4.9); Formyltetrahydrofolate synthetase (EC 6.3.4.3)]. [Source:Uniprot/SWISSPROT;Acc:P11586]
COL4A3BP	Post-Translational Modification	YEL016C	2.25197	ENSP00000230565	ENPP5		Ectonucleotide pyrophosphatase/phosphodiesterase 5 precursor (EC 3.1.-.-) (E-NPP5) (NPP-5). [Source:Uniprot/SWISSPROT;Acc:Q9UJA9]
COL4A3BP	Post-Translational Modification	YOR171C	2.21618	ENSP00000245222	SPHK2	Cell Death and Survival	Sphingosine kinase 2 (EC 2.7.1.-) (SK 2) (SPK 2). [Source:Uniprot/SWISSPROT;Acc:Q9NRA0]
COL4A3BP	Post-Translational Modification	YPL172C	2.4307	ENSP00000261643	COX10	Small Molecule Biochemistry	Protoheme IX farnesyltransferase, mitochondrial precursor (EC 2.5.1.-) (Heme O synthase). [Source:Uniprot/SWISSPROT;Acc:Q12887]
COL4A3BP	Post-Translational Modification	YBR105C	2.15837	ENSP00000268719	GID4		Uncharacterized protein C17orf39 [Source:UniProtKB/Swiss-Prot;Acc:Q8IVV7]
COL4A3BP	Post-Translational Modification	YJR125C	2.48547	ENSP00000270460	EPN1	Cellular Assembly and Organization	Epsin-1 (EPS-15 interacting protein 1) (EH domain-binding mitotic phosphoprotein). [Source:Uniprot/SWISSPROT;Acc:Q9Y6I3]
COL4A3BP	Post-Translational Modification	YML110C	2.94917	ENSP00000288532	COQ5		Ubiquinone biosynthesis methyltransferase COQ5, mitochondrial Precursor (EC 2.1.1.-) [Source:UniProtKB/Swiss-Prot;Acc:Q5HYK3]
COL4A3BP	Post-Translational Modification	YLR191W	2.4743	ENSP00000295030	PEX13	Small Molecule Biochemistry	Peroxisomal membrane protein PEX13 (Peroxin-13). [Source:Uniprot/SWISSPROT;Acc:Q92968]
COL4A3BP	Post-Translational Modification	YBR233W	1.98165	ENSP00000305556	PCBP1		Poly(rC)-binding protein 1 (Alpha-CP1) (hnRNP-E1) (Nucleic acid binding protein SUB2.3). [Source:Uniprot/SWISSPROT;Acc:Q15365]
COL4A3BP	Post-Translational Modification	YOR222W	2.08596	ENSP00000329452	SLC25A21	Molecular Transport	Mitochondrial 2-oxodicarboxylate carrier. [Source:Uniprot/SWISSPROT;Acc:Q9BQT8]
COL4A3BP	Post-Translational Modification	YBL002W	2.64832	ENSP00000336417	HIST2H2BE		Histone H2B.q (H2B/q) (H2B-GL105). [Source:Uniprot/SWISSPROT;Acc:Q16778]
COL4A3BP	Post-Translational Modification	YBL002W	2.64832	ENSP00000342886	HIST1H2BJ/HIST1H2BK		Histone H2B.a/g/h/k/l (H2B.1 A) (H2B/a) (H2B/g) (H2B/h) (H2B/k) (H2B/l). [Source:Uniprot/SWISSPROT;Acc:P62807]
COL4A3BP	Post-Translational Modification	YBL002W	2.64832	ENSP00000348924	HIST2HSBE		histone 2, H2bf [Source:RefSeq_peptide;Acc:NP_001019770]
COL4A3BP	Post-Translational Modification	YAL048C	2.64681	ENSP00000351132	RHOT1	Cell Death and Survival	ras homolog gene family, member T1 isoform 1 [Source:RefSeq_peptide;Acc:NP_001028740]
COL4A3BP	Post-Translational Modification	YBL002W	2.64832	ENSP00000353074	HIST1H2BC		Histone H2B.a/g/h/k/l (H2B.1 A) (H2B/a) (H2B/g) (H2B/h) (H2B/k) (H2B/l). [Source:Uniprot/SWISSPROT;Acc:P62807]
COL4A3BP	Post-Translational Modification	YDR020C	2.98822	ENSP00000356853	SDHC	Cell Death and Survival	succinate dehydrogenase complex, subunit C, integral membrane protein, 15kDa [Source:HGNC Symbol;Acc:10682]
COL4A3BP	Post-Translational Modification	YAL012W	2.72735	ENSP00000359976	CTH	Small Molecule Biochemistry	Cystathionine gamma-lyase (EC 4.4.1.1)(Gamma-cystathionase) [Source:UniProtKB/Swiss-Prot;Acc:P32929]
COL4A3BP	Post-Translational Modification	YMR105C	2.48072	ENSP00000360124	PGM1		Phosphoglucomutase-1 (PGM 1)(EC 5.4.2.2)(Glucose phosphomutase 1) [Source:UniProtKB/Swiss-Prot;Acc:P36871]
COL4A3BP	Post-Translational Modification	YER176W	2.21531	ENSP00000360817	ZNFX1		NFX1-type zinc finger-containing protein 1 [Source:UniProtKB/Swiss-Prot;Acc:Q9P2E3]
COL4A3BP	Post-Translational Modification	YJL036W	2.60981	ENSP00000363349	SNX30		Sorting nexin-30 [Source:UniProtKB/Swiss-Prot;Acc:Q5VWJ9]
COL4A3BP	Post-Translational Modification	YLL041C	2.7108	ENSP00000364649	SDHB	Cell Death and Survival	Succinate dehydrogenase [ubiquinone] iron-sulfur subunit, mitochondrial Precursor (EC 1.3.5.1)(Iron-sulfur subunit of complex II)(Ip) [Source:UniProtKB/Swiss-Prot;Acc:P21912]
COL4A3BP	Post-Translational Modification	YOR374W	2.4277	ENSP00000366927	ALDH1B1		Aldehyde dehydrogenase X, mitochondrial Precursor (EC 1.2.1.3)(Aldehyde dehydrogenase family 1 member B1)(Aldehyde dehydrogenase 5) [Source:UniProtKB/Swiss-Prot;Acc:P30837]
COL4A3BP	Post-Translational Modification	YBL002W	2.64832	ENSP00000366962	HIST2H2BE		Histone H2B type 1-C/E/F/G/I (H2B.a/g/h/k/l)(H2B.1 A)(H2B/a)(H2B/g)(H2B/h)(H2B/k)(H2B/l) [Source:UniProtKB/Swiss-Prot;Acc:P62807]
COL4A3BP	Post-Translational Modification	YPL048W	2.66235	ENSP00000367258	EEF1G		Elongation factor 1-gamma (EF-1-gamma)(eEF-1B gamma) [Source:UniProtKB/Swiss-Prot;Acc:P26641]
COL4A3BP	Post-Translational Modification	YJL112W	2.31958	ENSP00000379029	KIF21A	Cancer	Kinesin-like protein KIF21A (Kinesin-like protein KIF2)(Renal carcinoma antigen NY-REN-62) [Source:UniProtKB/Swiss-Prot;Acc:Q7Z4S6]
DYRK3	Cell death and survival	YOR269W	3.13876	ENSP00000006951	PAFAH1B1		Platelet-activating factor acetylhydrolase IB subunit alpha (PAF acetylhydrolase 45 kDa subunit)(PAF-AH 45 kDa subunit)(PAF-AH alpha)(PAFAH alpha)(Lissencephaly-1 protein)(LIS-1) [Source:UniProtKB/Swiss-Prot;Acc:P43034]
DYRK3	Cell death and survival	YOR006C	2.65799	ENSP00000007390	TSR3		UPF0293 protein C16orf42 [Source:UniProtKB/Swiss-Prot;Acc:Q9UJK0]
DYRK3	Cell death and survival	YDR043C	2.01666	ENSP00000173785	KLF6	Cancer	Core promoter element-binding protein (Kruppel-like factor 6) (B-cell derived protein 1) (Proto-oncogene BCD1) (Transcription factor Zf9) (GC-rich sites binding factor GBF). [Source:Uniprot/SWISSPROT;Acc:Q99612]
DYRK3	Cell death and survival	YOR231W	2.47027	ENSP00000178640	MAP2K5	Cell Death and Survival	Dual specificity mitogen-activated protein kinase kinase 5 (MAP kinase kinase 5)(MAPKK 5)(EC 2.7.12.2)(MAPK/ERK kinase 5) [Source:UniProtKB/Swiss-Prot;Acc:Q13163]
DYRK3	Cell death and survival	YJR088C	2.18405	ENSP00000220853	EMC2		Tetratricopeptide repeat protein 35 (TPR repeat protein 35) [Source:UniProtKB/Swiss-Prot;Acc:Q15006]
DYRK3	Cell death and survival	YDR270W	2.61817	ENSP00000242839	ATP7B	DNA Replication, Recombination, and Repair	Copper-transporting ATPase 2 (EC 3.6.3.4) (Copper pump 2) (Wilson disease-associated protein). [Source:Uniprot/SWISSPROT;Acc:P35670]
DYRK3	Cell death and survival	YMR194W	2.2258	ENSP00000252543	RPL36		60S ribosomal protein L36. [Source:Uniprot/SWISSPROT;Acc:Q9Y3U8]
DYRK3	Cell death and survival	YDL019C	2.66807	ENSP00000263847	OSBP	Lipid Metabolism	Oxysterol-binding protein 1. [Source:Uniprot/SWISSPROT;Acc:P22059]
DYRK3	Cell death and survival	YMR135C	2.14122	ENSP00000266069	GID8		Protein C20orf11 (Two-hybrid associated protein 1 with RanBPM) (Twa1). [Source:Uniprot/SWISSPROT;Acc:Q9NWU2]
DYRK3	Cell death and survival	YER156C	3.44458	ENSP00000267103	C12orf10		MYG1 protein. [Source:Uniprot/SWISSPROT;Acc:Q9HB07]
DYRK3	Cell death and survival	YBL102W	2.14719	ENSP00000271375	SFT2D2		Vesicle transport protein SFT2B (SFT2 domain-containing protein 2) [Source:UniProtKB/Swiss-Prot;Acc:O95562]
DYRK3	Cell death and survival	YMR150C	2.29066	ENSP00000278200	IMMP1L		Mitochondrial inner membrane protease subunit 1 (EC 3.4.21.-)(IMP1-like protein) [Source:UniProtKB/Swiss-Prot;Acc:Q96LU5]
DYRK3	Cell death and survival	YOR304W	2.66277	ENSP00000283131	SMARCA5	DNA Replication, Recombination, and Repair	SWI/SNF related matrix associated actin dependent regulator of chromatin subfamily A member 5 (EC 3.6.1.-) (SWI/SNF-related matrix- associated actin-dependent regulator of chromatin A5) (Sucrose nonfermenting protein 2 homolog) (hSNF2H). [Source:Uniprot/SWISSPROT;Acc:O60264]
DYRK3	Cell death and survival	YIL110W	2.37353	ENSP00000307077	METTL18		UPF0558 protein C1orf156 (Arsenic-transactivated protein 2)(AsTP2) [Source:UniProtKB/Swiss-Prot;Acc:O95568]
DYRK3	Cell death and survival	YEL039C	2.13237	ENSP00000307786	CYCS	Cell Death and Survival	Cytochrome c. [Source:Uniprot/SWISSPROT;Acc:P99999]
DYRK3	Cell death and survival	YMR171C	3.62314	ENSP00000316589	RANBP10		Ran-binding protein 10 (RanBP10) [Source:UniProtKB/Swiss-Prot;Acc:Q6VN20]
DYRK3	Cell death and survival	YER172C	2.15164	ENSP00000317123	SNRNP200	DNA Replication, Recombination, and Repair	U5 small nuclear ribonucleoprotein 200 kDa helicase (EC 3.6.1.-) (U5 snRNP-specific 200 kDa protein) (U5-200KD) (Activating signal cointegrator 1 complex subunit 3-like 1). [Source:Uniprot/SWISSPROT;Acc:O75643]
DYRK3	Cell death and survival	YDR165W	2.08867	ENSP00000328671	WDR4	Cell Death and Survival	WD-repeat protein 4. [Source:Uniprot/SWISSPROT;Acc:P57081]
DYRK3	Cell death and survival	YOR034C	3.29866	ENSP00000334868	ZDHHC17	Molecular Transport	Huntingtin-interacting protein 14 (Zinc finger DHHC domain containing protein 17) (Huntingtin-interacting protein 3) (Huntingtin-interacting protein HYPH) (Putative NF-kappa-B-activating protein 205) (Putative MAPK-activating protein PM11). [Source:Uniprot/SWISSPROT;Acc:Q8IUH5]
DYRK3	Cell death and survival	YER049W	2.10307	ENSP00000337196	OGFOD1	Cell Death and Survival	2-oxoglutarate and iron-dependent oxygenase domain-containing protein 1 (EC 1.14.11.-)(Termination and polyadenylation 1 homolog) [Source:UniProtKB/Swiss-Prot;Acc:Q8N543]
DYRK3	Cell death and survival	YCL064C	2.29881	ENSP00000341117	SDSL		serine dehydratase-like [Source:RefSeq_peptide;Acc:NP_612441]
DYRK3	Cell death and survival	YLR092W	2.19642	ENSP00000355384	SLC26A11	Molecular Transport	solute carrier family 26, member 11 [Source:RefSeq_peptide;Acc:NP_775897]
DYRK3	Cell death and survival	YCR014C	2.21603	ENSP00000359188	POLL	Cell Death and Survival	DNA polymerase lambda (Pol Lambda)(EC 2.7.7.7)(EC 4.2.99.-)(DNA polymerase kappa)(DNA polymerase beta-2)(Pol beta2) [Source:UniProtKB/Swiss-Prot;Acc:Q9UGP5]
DYRK3	Cell death and survival	YAL007C	2.62831	ENSP00000359313	TMED5		Transmembrane emp24 domain-containing protein 5 Precursor [Source:UniProtKB/Swiss-Prot;Acc:Q9Y3A6]
DYRK3	Cell death and survival	YJL164C	2.48095	ENSP00000359719	PRKACB	Cell Death and Survival	cAMP-dependent protein kinase catalytic subunit beta (PKA C-beta)(EC 2.7.11.11) [Source:UniProtKB/Swiss-Prot;Acc:P22694]
DYRK3	Cell death and survival	YBR093C	2.2576	ENSP00000361064	MINPP1	Cell Death and Survival	Multiple inositol polyphosphate phosphatase 1 Precursor (EC 3.1.3.62)(Inositol (1,3,4,5)-tetrakisphosphate 3-phosphatase)(Ins(1,3,4,5)P(4) 3-phosphatase) [Source:UniProtKB/Swiss-Prot;Acc:Q9UNW1]
DYRK3	Cell death and survival	YER074W	2.44931	ENSP00000361435	RPS24	Cancer	40S ribosomal protein S24 [Source:UniProtKB/Swiss-Prot;Acc:P62847]
DYRK3	Cell death and survival	YLR017W	2.18323	ENSP00000369519	MTAP	Nucleic Acid Metabolism	S-methyl-5'-thioadenosine phosphorylase (EC 2.4.2.28)(5'-methylthioadenosine phosphorylase)(MTA phosphorylase)(MTAPase) [Source:UniProtKB/Swiss-Prot;Acc:Q13126]
DYRK3	Cell death and survival	YPL074W	2.27393	ENSP00000378924	FIGNL1	DNA Replication, Recombination, and Repair	Fidgetin-like protein 1 (EC 3.6.4.-) [Source:UniProtKB/Swiss-Prot;Acc:Q6PIW4]
DYRK3	Cell death and survival	YOR090C	2.58744	ENSP00000379503	PDP1	Cell Death and Survival	[Pyruvate dehydrogenase [acetyl-transferring]]-phosphatase 1, mitochondrial Precursor (PDP 1)(EC 3.1.3.43)(Pyruvate dehydrogenase phosphatase, catalytic subunit 1)(PDPC 1)(Protein phosphatase 2C) [Source:UniProtKB/Swiss-Prot;Acc:Q9P0J1]
DYRK3	Cell death and survival	YHR075C	2.02785	ENSP00000381474	PPME1		Protein phosphatase methylesterase 1 (PME-1)(EC 3.1.1.-) [Source:UniProtKB/Swiss-Prot;Acc:Q9Y570]
DYRK3	Cell death and survival	YOR251C	2.02899	ENSP00000385828	TST	Protein Synthesis	Thiosulfate sulfurtransferase (EC 2.8.1.1)(Rhodanese) [Source:UniProtKB/Swiss-Prot;Acc:Q16762]
DYRK3	Cell death and survival	YBR059C	2.23999	ENSP00000386456	AAK1	Cell Death and Survival	AP2 associated kinase 1 [Source:HGNC Symbol;Acc:19679]
EPHA4	Cell death and survival	YIL159W	2.70818	ENSP00000247170	DAAM1		Disheveled-associated activator of morphogenesis 1 [Source:UniProtKB/Swiss-Prot;Acc:Q9Y4D1]
EPHA4	Cell death and survival	YAL049C	2.22515	ENSP00000296658	CMBL		Carboxymethylenebutenolidase homolog (EC 3.1.-.-) [Source:UniProtKB/Swiss-Prot;Acc:Q96DG6]
EPHA4	Cell death and survival	YEL006W	2.40855	ENSP00000297578	SLC25A32	Small Molecule Biochemistry	Mitochondrial folate transporter/carrier. [Source:Uniprot/SWISSPROT;Acc:Q9H2D1]
EPHA4	Cell death and survival	YPL115C	2.13842	ENSP00000303909	ABR		Active breakpoint cluster region-related protein [Source:UniProtKB/Swiss-Prot;Acc:Q12979]
EPHA4	Cell death and survival	YDR120C	2.77002	ENSP00000350352	TRMT1		N(2),N(2)-dimethylguanosine tRNA methyltransferase (EC 2.1.1.32)(tRNA(guanine-26,N(2)-N(2)) methyltransferase)(tRNA 2,2-dimethylguanosine-26 methyltransferase)(tRNA(m(2,2)G26)dimethyltransferase) [Source:UniProtKB/Swiss-Prot;Acc:Q9NXH9]
EPHA4	Cell death and survival	YMR023C	3.08318	ENSP00000351644	GTPBP3		GTP binding protein 3 (mitochondrial) isoform V [Source:RefSeq_peptide;Acc:NP_116009]
EPHA4	Cell death and survival	YJL121C	2.50718	ENSP00000352401	RPE		Ribulose-phosphate 3-epimerase (EC 5.1.3.1) (Ribulose-5-phosphate-3- epimerase). [Source:Uniprot/SWISSPROT;Acc:Q96AT9]
EPHA4	Cell death and survival	YOL075C	2.23719	ENSP00000363868	ABCA1	Molecular Transport	ATP-binding cassette sub-family A member 1 (ATP-binding cassette transporter 1)(ATP-binding cassette 1)(ABC-1)(Cholesterol efflux regulatory protein) [Source:UniProtKB/Swiss-Prot;Acc:O95477]
EPHA4	Cell death and survival	YLL041C	2.22924	ENSP00000364649	SDHB	Cell Death and Survival	Succinate dehydrogenase [ubiquinone] iron-sulfur subunit, mitochondrial Precursor (EC 1.3.5.1)(Iron-sulfur subunit of complex II)(Ip) [Source:UniProtKB/Swiss-Prot;Acc:P21912]
EPHA4	Cell death and survival	YMR020W	2.02848	ENSP00000367309	MAOB	Cell Death and Survival	Amine oxidase [flavin-containing] B (EC 1.4.3.4)(Monoamine oxidase type B)(MAO-B) [Source:UniProtKB/Swiss-Prot;Acc:P27338]
EPHA4	Cell death and survival	YLR131C	2.18091	ENSP00000369774	ZNF763		Zinc finger protein 763 [Source:UniProtKB/Swiss-Prot;Acc:Q0D2J5]
EPHA4	Cell death and survival	YPL198W	3.03112	ENSP00000381447			Uncharacterized protein ENSP00000381447 Fragment [Source:UniProtKB/TrEMBL;Acc:A8MY04]
FASTKD5		YPL196W	2.06454	ENSP00000217320	TLDC2		Uncharacterized protein C20orf118 [Source:UniProtKB/Swiss-Prot;Acc:A0PJX2]
FASTKD5		YCR017C	2.13279	ENSP00000226432	CWH43	Cancer	PGAP2-interacting protein [Source:UniProtKB/Swiss-Prot;Acc:Q9H720]
FASTKD5		YOR253W	1.96205	ENSP00000240922	NAA50	Cellular Assembly and Organization	N-acetyltransferase 13 (hNAT5)(hSAN)(EC 2.3.1.-) [Source:UniProtKB/Swiss-Prot;Acc:Q9GZZ1]
FASTKD5		YBR053C	1.991	ENSP00000253303	RGN	Small Molecule Biochemistry	Regucalcin (RC)(Senescence marker protein 30)(SMP-30) [Source:UniProtKB/Swiss-Prot;Acc:Q15493]
FASTKD5		YER057C	2.33108	ENSP00000254878	HRSP12	Protein Synthesis	Ribonuclease UK114 (EC 3.1.-.-) (14.5 kDa translational inhibitor protein) (p14.5) (UK114 antigen homolog). [Source:Uniprot/SWISSPROT;Acc:P52758]
FASTKD5		YAR042W	2.27056	ENSP00000263847	OSBP	Lipid Metabolism	Oxysterol-binding protein 1. [Source:Uniprot/SWISSPROT;Acc:P22059]
FASTKD5		YLR130C	2.33765	ENSP00000269740	SLC39A3		Zinc transporter ZIP3 (Zrt- and Irt-like protein 3)(ZIP-3)(Solute carrier family 39 member 3) [Source:UniProtKB/Swiss-Prot;Acc:Q9BRY0]
FASTKD5		YIL133C	2.76015	ENSP00000270634	RPL13A		60S ribosomal protein L13a (23 kDa highly basic protein). [Source:Uniprot/SWISSPROT;Acc:P40429]
FASTKD5		YPL046C	1.96211	ENSP00000284811	TCEB1	Cancer	Transcription elongation factor B polypeptide 1 (RNA polymerase II transcription factor SIII subunit C)(SIII p15)(Elongin 15 kDa subunit)(Elongin-C)(EloC) [Source:UniProtKB/Swiss-Prot;Acc:Q15369]
FASTKD5		YPL100W	3.02161	ENSP00000288828	WIPI2		WD repeat domain phosphoinositide-interacting protein 2 (WIPI-2)(WIPI49-like protein 2) [Source:UniProtKB/Swiss-Prot;Acc:Q9Y4P8]
FASTKD5		YPL002C	2.23866	ENSP00000290330	SNF8		Vacuolar sorting protein SNF8 (ELL-associated protein of 30 kDa). [Source:Uniprot/SWISSPROT;Acc:Q96H20]
FASTKD5		YJR036C	2.9426	ENSP00000298068	HECTD2		HECT domain containing 2 isoform a [Source:RefSeq_peptide;Acc:NP_877497]
FASTKD5		YPL009C	2.32286	ENSP00000298310	NEMF		Serologically defined colon cancer antigen 1 (Antigen NY-CO-1). [Source:Uniprot/SWISSPROT;Acc:O60524]
FASTKD5		YLR165C	2.74783	ENSP00000298317	RPUSD4		RNA pseudouridylate synthase domain-containing protein 4 [Source:UniProtKB/Swiss-Prot;Acc:Q96CM3]
FASTKD5		YLR130C	2.33765	ENSP00000298681	SLC39A2	Molecular Transport	Zinc transporter ZIP2 (Zrt- and Irt-like protein 2)(ZIP-2)(hZIP2)(Solute carrier family 39 member 2)(Eti-1)(6A1) [Source:UniProtKB/Swiss-Prot;Acc:Q9NP94]
FASTKD5		YDR006C	2.03982	ENSP00000299045	TCP11L2		T-complex protein 11-like protein 2 [Source:UniProtKB/Swiss-Prot;Acc:Q8N4U5]
FASTKD5		YPL132W	3.39526	ENSP00000299335	COX11	Cell Death and Survival	Cytochrome c oxidase assembly protein COX11, mitochondrial precursor. [Source:Uniprot/SWISSPROT;Acc:Q9Y6N1]
FASTKD5		YNL329C	2.49305	ENSP00000303511	PEX6	Molecular Transport	Peroxisome assembly factor 2 (PAF-2) (Peroxisomal-type ATPase 1) (Peroxin-6) (Peroxisomal biogenesis factor 6). [Source:Uniprot/SWISSPROT;Acc:Q13608]
FASTKD5		YNL252C	1.99922	ENSP00000312311	MRPL46		39S ribosomal protein L46, mitochondrial precursor (L46mt) (MRP-L46) (P2ECSL). [Source:Uniprot/SWISSPROT;Acc:Q9H2W6]
FASTKD5		YJL190C	2.17428	ENSP00000318646	RPS15A	Protein Synthesis	40S ribosomal protein S15a. [Source:Uniprot/SWISSPROT;Acc:P62244]
FASTKD5		YHR047C	2.8252	ENSP00000320324	NPEPPS	Protein Synthesis	Puromycin-sensitive aminopeptidase (EC 3.4.11.-) (PSA). [Source:Uniprot/SWISSPROT;Acc:P55786]
FASTKD5		YOL039W	2.5584	ENSP00000322419	RPLP2		60S acidic ribosomal protein P2. [Source:Uniprot/SWISSPROT;Acc:P05387]
FASTKD5		YOR113W	2.2015	ENSP00000329357	SP1	Cell Death and Survival	Transcription factor Sp1. [Source:Uniprot/SWISSPROT;Acc:P08047]
FASTKD5		YDR305C	2.63308	ENSP00000342087	FHIT	Cell Death and Survival	Bis(5'-adenosyl)-triphosphatase (EC 3.6.1.29) (Diadenosine 5',5'''- P1,P3-triphosphate hydrolase) (Dinucleosidetriphosphatase) (AP3A hydrolase) (AP3AASE) (Fragile histidine triad protein). [Source:Uniprot/SWISSPROT;Acc:P49789]
FASTKD5		YPL149W	3.33755	ENSP00000343313	ATG5	Cell Death and Survival	Autophagy protein 5 (APG5-like)(Apoptosis-specific protein) [Source:UniProtKB/Swiss-Prot;Acc:Q9H1Y0]
FASTKD5		YER110C	2.03563	ENSP00000346453	IPO4		Importin-4 (Importin 4b) (Imp4b) (Ran-binding protein 4) (RanBP4). [Source:Uniprot/SWISSPROT;Acc:Q8TEX9]
FASTKD5		YDR063W	2.74676	ENSP00000346789	GMFB		Glia maturation factor beta (GMF-beta) [Source:UniProtKB/Swiss-Prot;Acc:P60983]
FASTKD5		YBR220C	2.38769	ENSP00000352456	SLC33A1	Molecular Transport	acetyl-coenzyme A transporter [Source:RefSeq_peptide;Acc:NP_004724]
FASTKD5		YEL053C	2.14701	ENSP00000354972	NAA35	Cell Death and Survival	Protein MAK10 homolog (Embryonic growth-associated protein homolog) [Source:UniProtKB/Swiss-Prot;Acc:Q5VZE5]
FASTKD5		YLR181C	2.86008	ENSP00000356602	VTA1		vesicle (multivesicular body) trafficking 1 [Source:HGNC Symbol;Acc:20954]
FASTKD5		YJL164C	2.26205	ENSP00000359719	PRKACB	Cell Death and Survival	cAMP-dependent protein kinase catalytic subunit beta (PKA C-beta)(EC 2.7.11.11) [Source:UniProtKB/Swiss-Prot;Acc:P22694]
FASTKD5		YDR252W	2.33789	ENSP00000360658	BTF3L4		Transcription factor BTF3 homolog 4 (Basic transcription factor 3-like 4) [Source:UniProtKB/Swiss-Prot;Acc:Q96K17]
FASTKD5		YBR261C	2.00224	ENSP00000361564	NTMT1		Methyltransferase-like protein 11A (EC 2.1.1.-) [Source:UniProtKB/Swiss-Prot;Acc:Q9BV86]
FASTKD5		YJL004C	2.36681	ENSP00000361812	SYS1		SYS1 Golgi-localized integral membrane protein homolog (S. cerevisiae) [Source:HGNC Symbol;Acc:16162]
FASTKD5		YJR040W	2.53594	ENSP00000365256	CLCN5	Molecular Transport	Chloride channel protein 5 (ClC-5) [Source:UniProtKB/Swiss-Prot;Acc:P51795]
FASTKD5		YJR099W	2.30838	ENSP00000366813	UCHL3		Ubiquitin carboxyl-terminal hydrolase isozyme L3 (UCH-L3)(EC 3.4.19.12)(Ubiquitin thioesterase L3) [Source:UniProtKB/Swiss-Prot;Acc:P15374]
FASTKD5		YJL068C	2.56514	ENSP00000367992	ESD		S-formylglutathione hydrolase (FGH)(EC 3.1.2.12)(Esterase D) [Source:UniProtKB/Swiss-Prot;Acc:P10768]
FASTKD5		YOL016C	2.43951	ENSP00000368124	CAMK1D	Cellular Assembly and Organization	Calcium/calmodulin-dependent protein kinase type 1D (EC 2.7.11.17)(CaM kinase I delta)(CaM kinase ID)(CaM-KI delta)(CaMKI-delta)(CaMKI delta)(Camk1D)(CamKI-like protein kinase)(CKLiK) [Source:UniProtKB/Swiss-Prot;Acc:Q8IU85]
FASTKD5		YOR265W	2.34655	ENSP00000369736	TBCA	Cell Signaling	tubulin folding cofactor A [Source:HGNC Symbol;Acc:11579]
FASTKD5		YLL001W	2.3508	ENSP00000370388	DNM1L	Cell Death and Survival	Dynamin-1-like protein (EC 3.6.5.5)(Dynamin-like protein)(Dnm1p/Vps1p-like protein)(DVLP)(Dynamin family member proline-rich carboxyl-terminal domain less)(Dymple)(Dynamin-related protein 1)(Dynamin-like protein 4)(Dynamin-like protein IV)(HdynIV) [Source:UniProtKB/Swiss-Prot;Acc:O00429]
FASTKD5		YOR153W	2.8585	ENSP00000371818	ABCA3	Cell Death and Survival	ATP-binding cassette sub-family A member 3 (ATP-binding cassette transporter 3)(ATP-binding cassette 3)(ABC-C transporter) [Source:UniProtKB/Swiss-Prot;Acc:Q99758]
FASTKD5		YDR011W	2.54799	ENSP00000371818	ABCA3	Cell Death and Survival	ATP-binding cassette sub-family A member 3 (ATP-binding cassette transporter 3)(ATP-binding cassette 3)(ABC-C transporter) [Source:UniProtKB/Swiss-Prot;Acc:Q99758]
FASTKD5		YDL182W	2.46109	ENSP00000381654	HMGCLL1	Small Molecule Biochemistry	3-hydroxymethyl-3-methylglutaryl-CoA lyase-like 1 [Source:HGNC Symbol;Acc:21359]
FASTKD5		YDL188C	2.00621	ENSP00000384493	PPP2CB		Serine/threonine-protein phosphatase 2A catalytic subunit beta isoform (PP2A-beta)(EC 3.1.3.16) [Source:UniProtKB/Swiss-Prot;Acc:P62714]
FASTKD5		YBR222C	1.99902	ENSP00000384627	ACSF3	Lipid Metabolism	Acyl-CoA synthetase family member 3, mitochondrial Precursor (EC 6.2.1.-) [Source:UniProtKB/Swiss-Prot;Acc:Q4G176]
FASTKD5		YOR307C	1.99987	ENSP00000387152	SLC35E1		solute carrier family 35, member E1 [Source:HGNC Symbol;Acc:20803]
FGR	Cell death and survival	YDR257C	2.06382	ENSP00000219315	SETD6		SET domain-containing protein 6 [Source:UniProtKB/Swiss-Prot;Acc:Q8TBK2]
FGR	Cell death and survival	YHR132C	2.25301	ENSP00000222482	CPA4		Carboxypeptidase A4 precursor (EC 3.4.17.-) (Carboxypeptidase A3). [Source:Uniprot/SWISSPROT;Acc:Q9UI42]
FGR	Cell death and survival	YHR079C	2.96875	ENSP00000225768	ERN1		Serine/threonine-protein kinase/endoribonuclease IRE1 precursor (Inositol-requiring 1) (hIRE1p) (IRE1a) (Ire1-alpha) (Endoplasmic reticulum-to-nucleus signaling 1) [Includes: Serine/threonine-protein kinase (EC 2.7.1.37); Endoribonuclease (EC 3.1.26.-)]. [Source:Uniprot/SWISSPROT;Acc:O75460]
FGR	Cell death and survival	YEL062W	2.26079	ENSP00000232501	NPRL2	Post-Translational Modification	Tumor suppressor candidate 4 (NPR2-like) (Gene 21 protein) (G21 protein). [Source:Uniprot/SWISSPROT;Acc:Q8WTW4]
FGR	Cell death and survival	YDR221W	3.47194	ENSP00000252455	PRKCSH	Cellular Assembly and Organization	Glucosidase 2 subunit beta Precursor (Glucosidase II subunit beta)(Protein kinase C substrate, 60.1 kDa protein, heavy chain)(PKCSH)(80K-H protein) [Source:UniProtKB/Swiss-Prot;Acc:P14314]
FGR	Cell death and survival	YNL305C	3.61095	ENSP00000258412	TMBIM1		Transmembrane BAX inhibitor motif containing protein 1 (RECS1 protein homolog). [Source:Uniprot/SWISSPROT;Acc:Q969X1]
FGR	Cell death and survival	YHR123W	2.11498	ENSP00000260585	EPT1		Selenoprotein I. [Source:Uniprot/SWISSPROT;Acc:Q9C0D9]
FGR	Cell death and survival	YIL112W	2.54895	ENSP00000261207	PPP1R12A	Cellular Assembly and Organization	Protein phosphatase 1 regulatory subunit 12A (Myosin phosphatase-targeting subunit 1)(Myosin phosphatase target subunit 1)(Protein phosphatase myosin-binding subunit) [Source:UniProtKB/Swiss-Prot;Acc:O14974]
FGR	Cell death and survival	YBR164C	3.63509	ENSP00000261636	ARL1	Cell Death and Survival	ADP-ribosylation factor-like protein 1. [Source:Uniprot/SWISSPROT;Acc:P40616]
FGR	Cell death and survival	YBR001C	2.41824	ENSP00000264029	TREH	Small Molecule Biochemistry	Trehalase precursor (EC 3.2.1.28) (Alpha,alpha-trehalase) (Alpha,alpha-trehalose glucohydrolase). [Source:Uniprot/SWISSPROT;Acc:O43280]
FGR	Cell death and survival	YJL045W	2.29381	ENSP00000264932	SDHA	Cell Death and Survival	Succinate dehydrogenase [ubiquinone] flavoprotein subunit, mitochondrial precursor (EC 1.3.5.1) (Fp) (Flavoprotein subunit of complex II). [Source:Uniprot/SWISSPROT;Acc:P31040]
FGR	Cell death and survival	YML001W	2.31732	ENSP00000265062	RAB7A	Molecular Transport	Ras-related protein Rab-7. [Source:Uniprot/SWISSPROT;Acc:P51149]
FGR	Cell death and survival	YEL038W	3.25366	ENSP00000273920	ENOPH1	Small Molecule Biochemistry	E-1 enzyme [Source:RefSeq_peptide;Acc:NP_067027]
FGR	Cell death and survival	YOL032W	2.85344	ENSP00000278483	C11orf73	Cellular Assembly and Organization	Uncharacterized protein C11orf73 [Source:UniProtKB/Swiss-Prot;Acc:Q53FT3]
FGR	Cell death and survival	YNL260C	2.45039	ENSP00000279147	ORAOV1		Oral cancer overexpressed protein 1 (Tumor amplified and overexpressed sequence 1) [Source:UniProtKB/Swiss-Prot;Acc:Q8WV07]
FGR	Cell death and survival	YDL033C	3.2772	ENSP00000290846	TRMU		tRNA (5-methylaminomethyl-2-thiouridylate)-methyltransferase (EC 2.1.1.61). [Source:Uniprot/SWISSPROT;Acc:O75648]
FGR	Cell death and survival	YLR128W	3.20696	ENSP00000292782	DCUN1D1		DCN1-like protein 1 (Defective in cullin neddylation protein 1-like protein 1) (DCUN1-domain protein 1) (Squamous cell carcinoma-related oncogene). [Source:Uniprot/SWISSPROT;Acc:Q96GG9]
FGR	Cell death and survival	YER163C	3.03767	ENSP00000295304	CHAC2		Cation transport regulator-like protein 2 [Source:UniProtKB/Swiss-Prot;Acc:Q8WUX2]
FGR	Cell death and survival	YOR067C	2.39899	ENSP00000299626	ALG8	Post-Translational Modification	Probable dolichyl pyrophosphate Glc1Man9GlcNAc2 alpha-1,3- glucosyltransferase (EC 2.4.1.-) (Dolichyl-P-Glc:Glc1Man9GlcNAc2-PP- dolichyl glucosyltransferase) (Asparagine-linked glycosylation protein 8 homolog). [Source:Uniprot/SWISSPROT;Acc:Q9BVK2]
FGR	Cell death and survival	YCL001W	2.27624	ENSP00000302088	RER1	Cellular Assembly and Organization	Protein RER1 [Source:UniProtKB/Swiss-Prot;Acc:O15258]
FGR	Cell death and survival	YML131W	2.32351	ENSP00000311572	PTGR1	Cell Death and Survival	NADP-dependent leukotriene B4 12-hydroxydehydrogenase (EC 1.3.1.74) (15-oxoprostaglandin 13-reductase) (EC 1.3.1.48). [Source:Uniprot/SWISSPROT;Acc:Q14914]
FGR	Cell death and survival	YMR161W	2.12532	ENSP00000316053	DNAJB8		DnaJ homolog subfamily B member 8 [Source:UniProtKB/Swiss-Prot;Acc:Q8NHS0]
FGR	Cell death and survival	YDR148C	2.99162	ENSP00000335304	DLST	Cell Death and Survival	Dihydrolipoyllysine-residue succinyltransferase component of 2- oxoglutarate dehydrogenase complex, mitochondrial precursor (EC 2.3.1.61) (Dihydrolipoamide succinyltransferase component of 2- oxoglutarate dehydrogenase complex) (E2) (E2K). [Source:Uniprot/SWISSPROT;Acc:P36957]
FGR	Cell death and survival	YNL201C	2.36654	ENSP00000337125	SMEK1		SMEK homolog 1 [Source:UniProtKB/Swiss-Prot;Acc:Q6IN85]
FGR	Cell death and survival	YEL012W	2.64867	ENSP00000347836	UBE2H	Protein Synthesis	Ubiquitin-conjugating enzyme E2 H (EC 6.3.2.19) (Ubiquitin-protein ligase H) (Ubiquitin carrier protein H) (UbcH2) (E2-20K). [Source:Uniprot/SWISSPROT;Acc:P62256]
FGR	Cell death and survival	YOR243C	2.31288	ENSP00000348722	PUS7		Probable pseudouridine synthase KIAA1897 (EC 5.4.99.-). [Source:Uniprot/SWISSPROT;Acc:Q96PZ0]
FGR	Cell death and survival	YMR132C	2.30314	ENSP00000348933	CCDC25		coiled-coil domain containing 25 isoform 2 [Source:RefSeq_peptide;Acc:NP_060716]
FGR	Cell death and survival	YJL210W	2.32797	ENSP00000349543	PEX2	Cellular Assembly and Organization	Peroxisome biogenesis factor 2 [Source:Uniprot/SWISSPROT;Acc:P28328]
FGR	Cell death and survival	YHR028C	2.20304	ENSP00000353731	DPP4	Cell Death and Survival	Dipeptidyl peptidase 4 (EC 3.4.14.5) (Dipeptidyl peptidase IV) (DPP IV) (T-cell activation antigen CD26) (TP103) (Adenosine deaminase complexing protein 2) (ADABP) [Contains: Dipeptidyl peptidase 4 membrane form (Dipeptidyl peptidase IV membrane form); Di [Source:Uniprot/SWISSPROT;Acc:P27487]
FGR	Cell death and survival	YDR263C	2.44154	ENSP00000355506	EXO1	Cell Death and Survival	Exonuclease 1 (hExo1)(EC 3.1.-.-)(Exonuclease I)(hExoI) [Source:UniProtKB/Swiss-Prot;Acc:Q9UQ84]
FGR	Cell death and survival	YLR188W	2.53738	ENSP00000355637	ABCB10	Small Molecule Biochemistry	ATP-binding cassette sub-family B member 10, mitochondrial Precursor (ATP-binding cassette transporter 10)(ABC transporter 10 protein)(Mitochondrial ATP-binding cassette 2)(M-ABC2) [Source:UniProtKB/Swiss-Prot;Acc:Q9NRK6]
FGR	Cell death and survival	YBR210W	2.42837	ENSP00000355825	CNIH4		Protein cornichon homolog 4 [Source:UniProtKB/Swiss-Prot;Acc:Q9P003]
FGR	Cell death and survival	YJL126W	2.64785	ENSP00000356988	NIT1		Nitrilase homolog 1 (EC 3.5.-.-) [Source:UniProtKB/Swiss-Prot;Acc:Q86X76]
FGR	Cell death and survival	YER081W	2.58895	ENSP00000358417	PHGDH	Small Molecule Biochemistry	D-3-phosphoglycerate dehydrogenase (3-PGDH)(EC 1.1.1.95) [Source:UniProtKB/Swiss-Prot;Acc:O43175]
FGR	Cell death and survival	YLL028W	2.38897	ENSP00000358515	SLC22A15		solute carrier family 22, member 15 [Source:HGNC Symbol;Acc:20301]
FGR	Cell death and survival	YPL037C	2.07217	ENSP00000360658	BTF3L4		Transcription factor BTF3 homolog 4 (Basic transcription factor 3-like 4) [Source:UniProtKB/Swiss-Prot;Acc:Q96K17]
FGR	Cell death and survival	YIL069C	2.06636	ENSP00000361435	RPS24	Cancer	40S ribosomal protein S24 [Source:UniProtKB/Swiss-Prot;Acc:P62847]
FGR	Cell death and survival	YJR117W	2.45998	ENSP00000361845	ZMPSTE24	Protein Synthesis	CAAX prenyl protease 1 homolog (EC 3.4.24.84)(Prenyl protein-specific endoprotease 1)(Farnesylated proteins-converting enzyme 1)(FACE-1)(Zinc metalloproteinase Ste24 homolog) [Source:UniProtKB/Swiss-Prot;Acc:O75844]
FGR	Cell death and survival	YOR039W	2.1897	ENSP00000365046	CSNK2B	Small Molecule Biochemistry	Casein kinase II subunit beta (CK II beta)(Phosvitin)(G5a) [Source:UniProtKB/Swiss-Prot;Acc:P67870]
FGR	Cell death and survival	YML022W	2.09108	ENSP00000367615	APRT	Small Molecule Biochemistry	Adenine phosphoribosyltransferase (APRT)(EC 2.4.2.7) [Source:UniProtKB/Swiss-Prot;Acc:P07741]
FGR	Cell death and survival	YCL024W	2.6266	ENSP00000368363	NEK1		Serine/threonine-protein kinase Nek1 (EC 2.7.11.1)(NimA-related protein kinase 1)(Renal carcinoma antigen NY-REN-55) [Source:UniProtKB/Swiss-Prot;Acc:Q96PY6]
FGR	Cell death and survival	YOR180C	2.82206	ENSP00000369461	ECI2	Lipid Metabolism	Peroxisomal 3,2-trans-enoyl-CoA isomerase (EC 5.3.3.8)(Dodecenoyl-CoA isomerase)(Delta(3),delta(2)-enoyl-CoA isomerase)(D3,D2-enoyl-CoA isomerase)(DBI-related protein 1)(DRS-1)(Hepatocellular carcinoma-associated antigen 88)(Renal carcinoma antigen NY-REN-1) [Source:UniProtKB/Swiss-Prot;Acc:O75521]
FGR	Cell death and survival	YNL255C	1.97355	ENSP00000376968	CNBP		Cellular nucleic acid-binding protein (CNBP)(Zinc finger protein 9) [Source:UniProtKB/Swiss-Prot;Acc:P62633]
FGR	Cell death and survival	YML070W	2.07809	ENSP00000378360	DAK	Cancer	Dihydroxyacetone kinase (DHA kinase)(EC 2.7.1.29)(Glycerone kinase) [Source:UniProtKB/Swiss-Prot;Acc:Q3LXA3]
FGR	Cell death and survival	YLR206W	2.56016	ENSP00000378985	EPN2		Epsin-2 (EPS-15-interacting protein 2) [Source:UniProtKB/Swiss-Prot;Acc:O95208]
FGR	Cell death and survival	YOR039W	2.1897	ENSP00000382949	FAM90A27P		Casein kinase II subunit beta (CK II beta)(Phosvitin)(G5a) [Source:UniProtKB/Swiss-Prot;Acc:P67870]
FGR	Cell death and survival	YOR039W	2.1897	ENSP00000382984	CSNK2B	Small Molecule Biochemistry	Casein kinase II subunit beta (CK II beta)(Phosvitin)(G5a) [Source:UniProtKB/Swiss-Prot;Acc:P67870]
IKBKE	Cell death and survival	YHL016C	2.27894	ENSP00000222248	SLC5A5	Cell Death and Survival	Sodium/iodide cotransporter (Na(+)/I(-) cotransporter) (Sodium-iodide symporter) (Na(+)/I(-)-symporter). [Source:Uniprot/SWISSPROT;Acc:Q92911]
IKBKE	Cell death and survival	YIL065C	2.75939	ENSP00000223136	FIS1	Cell Death and Survival	Tetratricopeptide repeat protein 11 (TPR repeat protein 11) (Fis1 homolog). [Source:Uniprot/SWISSPROT;Acc:Q9Y3D6]
IKBKE	Cell death and survival	YMR026C	4.50702	ENSP00000225873	PEX12	Cellular Assembly and Organization	Peroxisome assembly protein 12 (Peroxin-12) (Peroxisome assembly factor 3) (PAF-3). [Source:Uniprot/SWISSPROT;Acc:O00623]
IKBKE	Cell death and survival	YER103W	2.16792	ENSP00000227378	HSPA8	Cell Death and Survival	Heat shock cognate 71 kDa protein (Heat shock 70 kDa protein 8). [Source:Uniprot/SWISSPROT;Acc:P11142]
IKBKE	Cell death and survival	YNL299W	2.44115	ENSP00000230859	PAPD7	Cellular Assembly and Organization	DNA polymerase sigma (EC 2.7.7.7) (Topoisomerase-related function protein 4-1) (TRF4-1) (LAK-1) (DNA polymerase kappa). [Source:Uniprot/SWISSPROT;Acc:Q5XG87]
IKBKE	Cell death and survival	YNL063W	2.13312	ENSP00000232854	HEMK1		HemK methyltransferase family member 1 (EC 2.1.1.-) (M.HsaHemKP). [Source:Uniprot/SWISSPROT;Acc:Q9Y5R4]
IKBKE	Cell death and survival	YDR097C	2.55723	ENSP00000234420	MSH6	DNA Replication, Recombination, and Repair	DNA mismatch repair protein MSH6 (MutS-alpha 160 kDa subunit) (G/T mismatch binding protein) (GTBP) (GTMBP) (p160). [Source:Uniprot/SWISSPROT;Acc:P52701]
IKBKE	Cell death and survival	YOR327C	2.04586	ENSP00000236192	VAMP4	Small Molecule Biochemistry	Vesicle-associated membrane protein 4 (VAMP-4). [Source:Uniprot/SWISSPROT;Acc:O75379]
IKBKE	Cell death and survival	YNL101W	2.95348	ENSP00000243389	SLC36A1	Molecular Transport	Proton-coupled amino acid transporter 1 (Proton/amino acid transporter 1) (Solute carrier family 36 member 1). [Source:Uniprot/SWISSPROT;Acc:Q7Z2H8]
IKBKE	Cell death and survival	YML018C	3.9117	ENSP00000245680	SLC35F5		solute carrier family 35, member F5 [Source:RefSeq_peptide;Acc:NP_079457]
IKBKE	Cell death and survival	YAL058W	3.04497	ENSP00000247461	CANX	Molecular Transport	Calnexin precursor (Major histocompatibility complex class I antigen- binding protein p88) (p90) (IP90). [Source:Uniprot/SWISSPROT;Acc:P27824]
IKBKE	Cell death and survival	YML124C	2.23861	ENSP00000248437	TUBA4A	Cancer	Tubulin alpha-1 chain (Alpha-tubulin 1) (Testis-specific alpha- tubulin) (Tubulin H2-alpha). [Source:Uniprot/SWISSPROT;Acc:P68366]
IKBKE	Cell death and survival	YOR291W	2.33521	ENSP00000256031	ATP13A3		Probable cation-transporting ATPase 13A3 (EC 3.6.3.-) (ATPase family homolog up-regulated in senescence cells 1). [Source:Uniprot/SWISSPROT;Acc:Q9H7F0]
IKBKE	Cell death and survival	YIL112W	2.07685	ENSP00000262457	INVS	Cell Morphology	Inversin (Inversion of embryo turning homolog)(Nephrocystin-2) [Source:UniProtKB/Swiss-Prot;Acc:Q9Y283]
IKBKE	Cell death and survival	YNL275W	2.31583	ENSP00000264485	SLC4A4	Molecular Transport	solute carrier family 4, sodium bicarbonate cotransporter, member 4 [Source:RefSeq_peptide;Acc:NP_003750]
IKBKE	Cell death and survival	YLR109W	2.48667	ENSP00000265462	PRDX5	Cell Death and Survival	Peroxiredoxin 5, mitochondrial precursor (EC 1.11.1.15) (Prx-V) (Peroxisomal antioxidant enzyme) (PLP) (Thioredoxin reductase) (Thioredoxin peroxidase PMP20) (Antioxidant enzyme B166) (AOEB166) (TPx type VI) (Liver tissue 2D-page spot 71B) (Alu corepresso [Source:Uniprot/SWISSPROT;Acc:P30044]
IKBKE	Cell death and survival	YLR130C	3.04955	ENSP00000269740	SLC39A3		Zinc transporter ZIP3 (Zrt- and Irt-like protein 3)(ZIP-3)(Solute carrier family 39 member 3) [Source:UniProtKB/Swiss-Prot;Acc:Q9BRY0]
IKBKE	Cell death and survival	YOR112W	2.58479	ENSP00000270176	SCYL1	Cellular Assembly and Organization	SCYL1 protein (Fragment). [Source:Uniprot/SPTREMBL;Acc:Q96G50]
IKBKE	Cell death and survival	YHR210C	2.01671	ENSP00000272252	GALM		Aldose 1-epimerase (EC 5.1.3.3)(Galactose mutarotase) [Source:UniProtKB/Swiss-Prot;Acc:Q96C23]
IKBKE	Cell death and survival	YHR117W	2.36353	ENSP00000284320	TOMM70A		Mitochondrial precursor proteins import receptor (Translocase of outer membrane TOM70). [Source:Uniprot/SWISSPROT;Acc:O94826]
IKBKE	Cell death and survival	YAL029C	2.30712	ENSP00000285039	MYO5B	Molecular Transport	Myosin-5B (Myosin Vb). [Source:Uniprot/SWISSPROT;Acc:Q9ULV0]
IKBKE	Cell death and survival	YDL168W	2.03638	ENSP00000296412	ADH5	Nucleic Acid Metabolism	Alcohol dehydrogenase class III chi chain (EC 1.1.1.1) (S- (hydroxymethyl)glutathione dehydrogenase) (EC 1.1.1.284) (Glutathione- dependent formaldehyde dehydrogenase) (FDH). [Source:Uniprot/SWISSPROT;Acc:P11766]
IKBKE	Cell death and survival	YAL049C	2.98749	ENSP00000296658	CMBL		Carboxymethylenebutenolidase homolog (EC 3.1.-.-) [Source:UniProtKB/Swiss-Prot;Acc:Q96DG6]
IKBKE	Cell death and survival	YEL030W	2.76466	ENSP00000297185	HSPA9	Cell Death and Survival	Stress-70 protein, mitochondrial precursor (75 kDa glucose regulated protein) (GRP 75) (Peptide-binding protein 74) (PBP74) (Mortalin) (MOT). [Source:Uniprot/SWISSPROT;Acc:P38646]
IKBKE	Cell death and survival	YEL006W	2.8902	ENSP00000297578	SLC25A32	Small Molecule Biochemistry	Mitochondrial folate transporter/carrier. [Source:Uniprot/SWISSPROT;Acc:Q9H2D1]
IKBKE	Cell death and survival	YBL049W	2.02616	ENSP00000300022	YPEL4		Yippee-like protein 4. [Source:Uniprot/SWISSPROT;Acc:Q96NS1]
IKBKE	Cell death and survival	YDR304C	3.0743	ENSP00000300026	PPIB	Small Molecule Biochemistry	Peptidyl-prolyl cis-trans isomerase B precursor (EC 5.2.1.8) (PPIase) (Rotamase) (Cyclophilin B) (S-cyclophilin) (SCYLP) (CYP-S1). [Source:Uniprot/SWISSPROT;Acc:P23284]
IKBKE	Cell death and survival	YML028W	3.26085	ENSP00000301522	PRDX2	Cell Death and Survival	Peroxiredoxin 2 (EC 1.11.1.15) (Thioredoxin peroxidase 1) (Thioredoxin-dependent peroxide reductase 1) (Thiol-specific antioxidant protein) (TSA) (PRP) (Natural killer cell enhancing factor B) (NKEF-B). [Source:Uniprot/SWISSPROT;Acc:P32119]
IKBKE	Cell death and survival	YPL081W	2.31191	ENSP00000302896	RPS9	Protein Synthesis	40S ribosomal protein S9. [Source:Uniprot/SWISSPROT;Acc:P46781]
IKBKE	Cell death and survival	YML012W	2.05882	ENSP00000303145	TMED10	Cell Death and Survival	Transmembrane protein Tmp21 precursor (21 kDa transmembrane trafficking protein) (p24delta) (S31III125) (S31I125) (Tmp-21-I). [Source:Uniprot/SWISSPROT;Acc:P49755]
IKBKE	Cell death and survival	YNL329C	2.73756	ENSP00000303511	PEX6	Molecular Transport	Peroxisome assembly factor 2 (PAF-2) (Peroxisomal-type ATPase 1) (Peroxin-6) (Peroxisomal biogenesis factor 6). [Source:Uniprot/SWISSPROT;Acc:Q13608]
IKBKE	Cell death and survival	YPL147W	2.59806	ENSP00000310688	ABCD2	Lipid Metabolism	ATP-binding cassette sub-family D member 2 (Adrenoleukodystrophy- related protein) (hALDR) (Adrenoleukodystrophy-like 1). [Source:Uniprot/SWISSPROT;Acc:Q9UBJ2]
IKBKE	Cell death and survival	YBR042C	2.40464	ENSP00000314036	AGPAT4		1-acyl-sn-glycerol-3-phosphate acyltransferase delta (EC 2.3.1.51) (1- AGP acyltransferase 4) (1-AGPAT 4) (Lysophosphatidic acid acyltransferase-delta) (LPAAT-delta) (1-acylglycerol-3-phosphate O- acyltransferase 4). [Source:Uniprot/SWISSPROT;Acc:Q9NRZ5]
IKBKE	Cell death and survival	YEL071W	2.15364	ENSP00000315351	D2HGDH	Protein Synthesis	MGC25181 protein. [Source:Uniprot/SPTREMBL;Acc:Q6IQ24]
IKBKE	Cell death and survival	YPL134C	1.98847	ENSP00000329452	SLC25A21		Mitochondrial 2-oxodicarboxylate carrier. [Source:Uniprot/SWISSPROT;Acc:Q9BQT8]
IKBKE	Cell death and survival	YHL010C	2.18432	ENSP00000330813	BRAP		BRCA1-associated protein (EC 6.3.2.-) (BRAP2) (Impedes mitogenic signal propagation) (IMP) (RING finger protein 52). [Source:Uniprot/SWISSPROT;Acc:Q7Z569]
IKBKE	Cell death and survival	YER174C	2.13491	ENSP00000330836	GLRX3		Glutaredoxin-3 (Thioredoxin-like protein 2)(PKC-interacting cousin of thioredoxin)(PKC-theta-interacting protein)(PKCq-interacting protein) [Source:UniProtKB/Swiss-Prot;Acc:O76003]
IKBKE	Cell death and survival	YAL046C	3.26265	ENSP00000331369	BOLA3		BolA-like protein 3 [Source:UniProtKB/Swiss-Prot;Acc:Q53S33]
IKBKE	Cell death and survival	YER031C	3.74394	ENSP00000333547	RAB11B		Ras-related protein Rab-11B (GTP-binding protein YPT3). [Source:Uniprot/SWISSPROT;Acc:Q15907]
IKBKE	Cell death and survival	YER169W	2.00018	ENSP00000334181	KDM4D		jumonji domain containing 2D [Source:RefSeq_peptide;Acc:NP_060509]
IKBKE	Cell death and survival	YMR207C	3.17101	ENSP00000341044	ACACB	Small Molecule Biochemistry	Acetyl-CoA carboxylase 2 (EC 6.4.1.2) (ACC-beta) [Includes: Biotin carboxylase (EC 6.3.4.14)]. [Source:Uniprot/SWISSPROT;Acc:O00763]
IKBKE	Cell death and survival	YDR305C	2.4304	ENSP00000342087	FHIT	Cell Death and Survival	Bis(5'-adenosyl)-triphosphatase (EC 3.6.1.29) (Diadenosine 5',5'''- P1,P3-triphosphate hydrolase) (Dinucleosidetriphosphatase) (AP3A hydrolase) (AP3AASE) (Fragile histidine triad protein). [Source:Uniprot/SWISSPROT;Acc:P49789]
IKBKE	Cell death and survival	YNL125C	2.63564	ENSP00000343022	SLC16A12		solute carrier family 16 (monocarboxylic acid transporters), member 12 [Source:RefSeq_peptide;Acc:NP_998771]
IKBKE	Cell death and survival	YDL072C	2.03687	ENSP00000343458	BCAP31		B-cell receptor-associated protein 31 (BCR-associated protein Bap31) (p28 Bap31) (CDM protein) (6C6-AG tumor-associated antigen) (DXS1357E). [Source:Uniprot/SWISSPROT;Acc:P51572]
IKBKE	Cell death and survival	YLL039C	2.4575	ENSP00000344818	UBC		Ubiquitin. [Source:Uniprot/SWISSPROT;Acc:P62988]
IKBKE	Cell death and survival	YPR003C	1.98887	ENSP00000347778	SLC26A8	Molecular Transport	Testis anion transporter 1 (Anion exchange transporter)(Solute carrier family 26 member 8) [Source:UniProtKB/Swiss-Prot;Acc:Q96RN1]
IKBKE	Cell death and survival	YEL037C	2.9481	ENSP00000350708	RAD23B	Cell Death and Survival	UV excision repair protein RAD23 homolog B (hHR23B)(XP-C repair-complementing complex 58 kDa protein)(p58) [Source:UniProtKB/Swiss-Prot;Acc:P54727]
IKBKE	Cell death and survival	YNL183C	2.50802	ENSP00000350896	EPHB4	Cell Death and Survival	Ephrin type-B receptor 4 Precursor (EC 2.7.10.1)(Tyrosine-protein kinase receptor HTK)(Tyrosine-protein kinase TYRO11) [Source:UniProtKB/Swiss-Prot;Acc:P54760]
IKBKE	Cell death and survival	YDL025C	2.17262	ENSP00000350896	EPHB4	Cell Death and Survival	Ephrin type-B receptor 4 Precursor (EC 2.7.10.1)(Tyrosine-protein kinase receptor HTK)(Tyrosine-protein kinase TYRO11) [Source:UniProtKB/Swiss-Prot;Acc:P54760]
IKBKE	Cell death and survival	YNL175C	2.64516	ENSP00000352956	RBM23	Cancer	Probable RNA-binding protein 23 (RNA-binding motif protein 23)(RNA-binding region-containing protein 4)(Splicing factor SF2) [Source:UniProtKB/Swiss-Prot;Acc:Q86U06]
IKBKE	Cell death and survival	YEL052W	2.61973	ENSP00000357973	LACE1		Lactation elevated protein 1 [Source:UniProtKB/Swiss-Prot;Acc:Q8WV93]
IKBKE	Cell death and survival	YBR043C	2.4721	ENSP00000358515	SLC22A15		solute carrier family 22, member 15 [Source:HGNC Symbol;Acc:20301]
IKBKE	Cell death and survival	YBR093C	3.24161	ENSP00000361064	MINPP1	Cell Death and Survival	Multiple inositol polyphosphate phosphatase 1 Precursor (EC 3.1.3.62)(Inositol (1,3,4,5)-tetrakisphosphate 3-phosphatase)(Ins(1,3,4,5)P(4) 3-phosphatase) [Source:UniProtKB/Swiss-Prot;Acc:Q9UNW1]
IKBKE	Cell death and survival	YBL072C	3.75346	ENSP00000361288	RPS8		40S ribosomal protein S8 [Source:UniProtKB/Swiss-Prot;Acc:P62241]
IKBKE	Cell death and survival	YBL003C	2.21119	ENSP00000364310	H2AFX	Cell Death and Survival	Histone H2A.x (H2a/x) [Source:UniProtKB/Swiss-Prot;Acc:P16104]
IKBKE	Cell death and survival	YDR248C	2.956	ENSP00000365601	IDNK		Probable gluconokinase (EC 2.7.1.12)(Gluconate kinase) [Source:UniProtKB/Swiss-Prot;Acc:Q5T6J7]
IKBKE	Cell death and survival	YNL265C	2.62059	ENSP00000368076	IST1		Uncharacterized protein KIAA0174 (Putative MAPK-activating protein PM28) [Source:UniProtKB/Swiss-Prot;Acc:P53990]
IKBKE	Cell death and survival	YJR069C	3.79792	ENSP00000369456	ITPA	DNA Replication, Recombination, and Repair	Inosine triphosphate pyrophosphatase (ITPase)(Inosine triphosphatase)(EC 3.6.1.19)(Putative oncogene protein hlc14-06-p) [Source:UniProtKB/Swiss-Prot;Acc:Q9BY32]
IKBKE	Cell death and survival	YIL052C	2.21786	ENSP00000378162	PRL34	Cancer	60S ribosomal protein L34 [Source:UniProtKB/Swiss-Prot;Acc:P49207]
IKBKE	Cell death and survival	YJR097W	2.8015	ENSP00000379279	DNAJC24		DnaJ homolog subfamily C member 24 [Source:UniProtKB/Swiss-Prot;Acc:J3KPT8]
IKBKE	Cell death and survival	YOR090C	2.43531	ENSP00000379503	PDP1	Cell Death and Survival	[Pyruvate dehydrogenase [acetyl-transferring]]-phosphatase 1, mitochondrial Precursor (PDP 1)(EC 3.1.3.43)(Pyruvate dehydrogenase phosphatase, catalytic subunit 1)(PDPC 1)(Protein phosphatase 2C) [Source:UniProtKB/Swiss-Prot;Acc:Q9P0J1]
IKBKE	Cell death and survival	YMR022W	2.10606	ENSP00000381001	UBE2G2		Ubiquitin-conjugating enzyme E2 G2 (EC 6.3.2.19)(Ubiquitin-protein ligase G2)(Ubiquitin carrier protein G2) [Source:UniProtKB/Swiss-Prot;Acc:P60604]
IKBKE	Cell death and survival	YLR083C	2.37529	ENSP00000381104	TM9SF4		Transmembrane 9 superfamily member 4 Precursor [Source:UniProtKB/Swiss-Prot;Acc:Q92544]
IKBKE	Cell death and survival	YDR135C	2.26906	ENSP00000382340	ABCC1	Cell Death and Survival	Multidrug resistance-associated protein 1 (ATP-binding cassette sub-family C member 1)(Leukotriene C(4) transporter)(LTC4 transporter) [Source:UniProtKB/Swiss-Prot;Acc:P33527]
IKBKE	Cell death and survival	YBR222C	2.03361	ENSP00000384627	ACSF3	Lipid Metabolism	Acyl-CoA synthetase family member 3, mitochondrial Precursor (EC 6.2.1.-) [Source:UniProtKB/Swiss-Prot;Acc:Q4G176]
IKBKE	Cell death and survival	YIL148W	2.60652	ENSP00000386142	UBA52		Ubiquitin [Source:UniProtKB/Swiss-Prot;Acc:P62988]
IKBKE	Cell death and survival	YJL193W	3.51603	ENSP00000387152	SLC35E1		solute carrier family 35, member E1 [Source:HGNC Symbol;Acc:20803]
MAP4K3	Post-Translational Modification	YNL072W	2.04088	ENSP00000221486	RNASEH2A	Cell Death and Survival	Ribonuclease HI large subunit (EC 3.1.26.4) (RNase HI large subunit) (RNase H(35)) (Ribonuclease H2) (RNase H2). [Source:Uniprot/SWISSPROT;Acc:O75792]
MAP4K3	Post-Translational Modification	YJR102C	2.64214	ENSP00000253794	VPS25		Vacuolar protein sorting protein 25 (hVps25) (ELL-associated protein of 20 kDa) (Dermal papilla derived protein 9). [Source:Uniprot/SWISSPROT;Acc:Q9BRG1]
MAP4K3	Post-Translational Modification	YDR142C	2.99693	ENSP00000315680	PEX7	Molecular Transport	Peroxisomal targeting signal 2 receptor (PTS2 receptor) (Peroxin-7). [Source:Uniprot/SWISSPROT;Acc:O00628]
MAP4K3	Post-Translational Modification	YHR012W	2.76293	ENSP00000353786	VPS29		Vacuolar protein sorting-associated protein 29 (EC 3.1.3.3)(Vesicle protein sorting 29)(hVPS29)(PEP11) [Source:UniProtKB/Swiss-Prot;Acc:Q9UBQ0]
MAP4K3	Post-Translational Modification	YDL154W	2.87379	ENSP00000364894	MSH5		MutS protein homolog 5 [Source:UniProtKB/Swiss-Prot;Acc:O43196]
MAPK9	Cell death and survival	YOR327C	2.13439	ENSP00000236192	VAMP4	Small Molecule Biochemistry	Vesicle-associated membrane protein 4 (VAMP-4). [Source:Uniprot/SWISSPROT;Acc:O75379]
MAPK9	Cell death and survival	YLR174W	3.28502	ENSP00000260985	IDH1	Nucleic Acid Metabolism	Isocitrate dehydrogenase [NADP] cytoplasmic (EC 1.1.1.42) (Oxalosuccinate decarboxylase) (IDH) (NADP(+)-specific ICDH) (IDP). [Source:Uniprot/SWISSPROT;Acc:O75874]
MAPK9	Cell death and survival	YOR134W	2.16958	ENSP00000289968	ARHGAP17		Rho GTPase-activating protein 17 (Rho-type GTPase-activating protein 17)(RhoGAP interacting with CIP4 homologs protein 1)(RICH-1) [Source:UniProtKB/Swiss-Prot;Acc:Q68EM7]
MAPK9	Cell death and survival	YPL230W	1.98704	ENSP00000293068	IKZF3		Zinc finger protein Aiolos. [Source:Uniprot/SWISSPROT;Acc:Q9UKT9]
MAPK9	Cell death and survival	YER163C	2.06502	ENSP00000295304	CHAC2		Cation transport regulator-like protein 2 [Source:UniProtKB/Swiss-Prot;Acc:Q8WUX2]
MAPK9	Cell death and survival	YHR057C	2.01703	ENSP00000300026	PPIB	Small Molecule Biochemistry	Peptidyl-prolyl cis-trans isomerase B precursor (EC 5.2.1.8) (PPIase) (Rotamase) (Cyclophilin B) (S-cyclophilin) (SCYLP) (CYP-S1). [Source:Uniprot/SWISSPROT;Acc:P23284]
MAPK9	Cell death and survival	YOR356W	2.09488	ENSP00000303552	ETEDH		Electron transfer flavoprotein-ubiquinone oxidoreductase, mitochondrial precursor (EC 1.5.5.1) (ETF-QO) (ETF-ubiquinone oxidoreductase) (ETF dehydrogenase) (Electron-transferring- flavoprotein dehydrogenase). [Source:Uniprot/SWISSPROT;Acc:Q16134]
MAPK9	Cell death and survival	YEL039C	2.86289	ENSP00000307786	CYCS	Cell Death and Survival	Cytochrome c. [Source:Uniprot/SWISSPROT;Acc:P99999]
MAPK9	Cell death and survival	YLR174W	3.28502	ENSP00000331897	IDH2	Cancer	Isocitrate dehydrogenase [NADP], mitochondrial precursor (EC 1.1.1.42) (Oxalosuccinate decarboxylase) (IDH) (NADP(+)-specific ICDH) (IDP) (ICD-M). [Source:Uniprot/SWISSPROT;Acc:P48735]
MAPK9	Cell death and survival	YOR127W	2.25895	ENSP00000340594	SYDE2		Rho GTPase-activating protein SYDE2 (Synapse defective protein 1 homolog 2)(Protein syd-1 homolog 2) [Source:UniProtKB/Swiss-Prot;Acc:Q5VT97]
MAPK9	Cell death and survival	YMR110C	1.98933	ENSP00000345774	ALDH3A2	Small Molecule Biochemistry	Fatty aldehyde dehydrogenase (EC 1.2.1.3) (Aldehyde dehydrogenase, microsomal) (Aldehyde dehydrogenase family 3 member A2). [Source:Uniprot/SWISSPROT;Acc:P51648]
MAPK9	Cell death and survival	YOR316C	2.1416	ENSP00000355968	SLC30A1	Molecular Transport	Zinc transporter 1 (ZnT-1)(Solute carrier family 30 member 1) [Source:UniProtKB/Swiss-Prot;Acc:Q9Y6M5]
MAPK9	Cell death and survival	YOR070C	2.99535	ENSP00000365962	TBC1D25		TBC1 domain family member 25 [Source:UniProtKB/Swiss-Prot;Acc:Q3MII6]
MAPK9	Cell death and survival	YOR334W	2.43511	ENSP00000367637	MRS2		Magnesium transporter MRS2 homolog, mitochondrial Precursor (MRS2-like protein) [Source:UniProtKB/Swiss-Prot;Acc:Q9HD23]
MAPK9	Cell death and survival	YBR018C	3.47207	ENSP00000368119	GALT	Small Molecule Biochemistry	Galactose-1-phosphate uridylyltransferase (Gal-1-P uridylyltransferase)(EC 2.7.7.12)(UDP-glucose--hexose-1-phosphate uridylyltransferase) [Source:UniProtKB/Swiss-Prot;Acc:P07902]
MAPK9	Cell death and survival	YLR034C	2.21793	ENSP00000378364	SLC11A2	Cell Death and Survival	Natural resistance-associated macrophage protein 2 (NRAMP 2)(Divalent metal transporter 1)(DMT1) [Source:UniProtKB/Swiss-Prot;Acc:P49281]
MAPK9	Cell death and survival	YPL074W	2.0872	ENSP00000378924	FIGNL1	DNA Replication, Recombination, and Repair	Fidgetin-like protein 1 (EC 3.6.4.-) [Source:UniProtKB/Swiss-Prot;Acc:Q6PIW4]
MARK2	Post-Translational Modification	YPL091W	2.19424	ENSP00000221130	GSR	Protein Synthesis	Glutathione reductase, mitochondrial precursor (EC 1.8.1.7) (GR) (GRase). [Source:Uniprot/SWISSPROT;Acc:P00390]
MARK2	Post-Translational Modification	YOR348C	1.98437	ENSP00000231706	SLC7A14		solute carrier family 7 (cationic amino acid transporter, y+ system), member 14 [Source:RefSeq_peptide;Acc:NP_066000]
MARK2	Post-Translational Modification	YPL172C	2.06471	ENSP00000261643	COX10	Small Molecule Biochemistry	Protoheme IX farnesyltransferase, mitochondrial precursor (EC 2.5.1.-) (Heme O synthase). [Source:Uniprot/SWISSPROT;Acc:Q12887]
MARK2	Post-Translational Modification	YPL001W	2.84485	ENSP00000264108	HAT1	Cell Death and Survival	Histone acetyltransferase type B catalytic subunit (EC 2.3.1.48). [Source:Uniprot/SWISSPROT;Acc:O14929]
MARK2	Post-Translational Modification	YNL083W	3.00615	ENSP00000264128	SLC25A24		solute carrier family 25 member 24 isoform 1 [Source:RefSeq_peptide;Acc:NP_037518]
MARK2	Post-Translational Modification	YLR070C	2.35127	ENSP00000267814	SORD	Small Molecule Biochemistry	Sorbitol dehydrogenase (EC 1.1.1.14) (L-iditol 2-dehydrogenase). [Source:Uniprot/SWISSPROT;Acc:Q00796]
MARK2	Post-Translational Modification	YER166W	2.10902	ENSP00000273859	ATP10D		Potential phospholipid-transporting ATPase VD (EC 3.6.3.1) (ATPVD). [Source:Uniprot/SWISSPROT;Acc:Q9P241]
MARK2	Post-Translational Modification	YMR150C	2.28627	ENSP00000278200	IMMP1L		Mitochondrial inner membrane protease subunit 1 (EC 3.4.21.-)(IMP1-like protein) [Source:UniProtKB/Swiss-Prot;Acc:Q96LU5]
MARK2	Post-Translational Modification	YMR109W	2.84429	ENSP00000288235	MYO1E	Cell Morphology	Myosin Ie (Myosin Ic). [Source:Uniprot/SWISSPROT;Acc:Q12965]
MARK2	Post-Translational Modification	YJL133W	2.54701	ENSP00000290075	SLC25A37	Molecular Transport	mitochondrial solute carrier protein isoform 1 [Source:RefSeq_peptide;Acc:NP_057696]
MARK2	Post-Translational Modification	YMR182C	2.07085	ENSP00000293068	IKZF3		Zinc finger protein Aiolos. [Source:Uniprot/SWISSPROT;Acc:Q9UKT9]
MARK2	Post-Translational Modification	YHR121W	2.18696	ENSP00000293406	LSM12		Protein LSM12 homolog [Source:UniProtKB/Swiss-Prot;Acc:Q3MHD2]
MARK2	Post-Translational Modification	YOL071W	2.35025	ENSP00000301761	SDHAF2	Cancer	Protein EMI5 homolog, mitochondrial Precursor [Source:UniProtKB/Swiss-Prot;Acc:Q9NX18]
MARK2	Post-Translational Modification	YOR356W	2.51221	ENSP00000303552	ETEDH		Electron transfer flavoprotein-ubiquinone oxidoreductase, mitochondrial precursor (EC 1.5.5.1) (ETF-QO) (ETF-ubiquinone oxidoreductase) (ETF dehydrogenase) (Electron-transferring- flavoprotein dehydrogenase). [Source:Uniprot/SWISSPROT;Acc:Q16134]
MARK2	Post-Translational Modification	YOR308C	2.77819	ENSP00000310448	SART1		squamous cell carcinoma antigen recognized by T cells 1 [Source:RefSeq_peptide;Acc:NP_005137]
MARK2	Post-Translational Modification	YMR171C	2.06773	ENSP00000316589	RANBP10		Ran-binding protein 10 (RanBP10) [Source:UniProtKB/Swiss-Prot;Acc:Q6VN20]
MARK2	Post-Translational Modification	YPL095C	3.2329	ENSP00000326491	ABHD1		alpha/beta hydrolase domain containing protein 1 isoform 1 [Source:RefSeq_peptide;Acc:NP_115993]
MARK2	Post-Translational Modification	YBL037W	2.29504	ENSP00000327694	AP2A2	Cell Death and Survival	Adapter-related protein complex 2 alpha 2 subunit (Alpha-adaptin C) (Adaptor protein complex AP-2 alpha-2 subunit) (Clathrin assembly protein complex 2 alpha-C large chain) (100 kDa coated vesicle protein C) (Plasma membrane adaptor HA2/AP2 adaptin alpha [Source:Uniprot/SWISSPROT;Acc:O94973]
MARK2	Post-Translational Modification	YOR246C	2.65324	ENSP00000334113	DHRSX		Dehydrogenase/reductase SDR family member on chromosome X [Source:Uniprot/SWISSPROT;Acc:Q8N5I4]
MARK2	Post-Translational Modification	YDL130W	2.76501	ENSP00000346037	RPLP1		60S acidic ribosomal protein P1. [Source:Uniprot/SWISSPROT;Acc:P05386]
MARK2	Post-Translational Modification	YHR171W	2.93099	ENSP00000346437	ATG7	Small Molecule Biochemistry	Autophagy protein 7-like (APG7-like) (Ubiquitin activating enzyme E1- like protein) (hAGP7). [Source:Uniprot/SWISSPROT;Acc:O95352]
MARK2	Post-Translational Modification	YER131W	2.12983	ENSP00000348849	RPS26		40S ribosomal protein S26. [Source:Uniprot/SWISSPROT;Acc:P62854]
MARK2	Post-Translational Modification	YOR027W	2.37176	ENSP00000351646	STIP1	Small Molecule Biochemistry	Stress-induced-phosphoprotein 1 (STI1) (Hsc70/Hsp90-organizing protein) (Hop) (Transformation-sensitive protein IEF SSP 3521). [Source:Uniprot/SWISSPROT;Acc:P31948]
MARK2	Post-Translational Modification	YPL167C	2.6846	ENSP00000357795	REV3L	Cell Death and Survival	DNA polymerase zeta catalytic subunit (hREV3)(EC 2.7.7.7) [Source:UniProtKB/Swiss-Prot;Acc:O60673]
MARK2	Post-Translational Modification	YAL022C	2.3904	ENSP00000362285	SLC29A3	Molecular Transport	Equilibrative nucleoside transporter 3 (Solute carrier family 29 member 3) [Source:UniProtKB/Swiss-Prot;Acc:Q9BZD2]
MARK2	Post-Translational Modification	YNL326C	2.27153	ENSP00000362465	ZDHHC15	Cellular Assembly and Organization	Palmitoyltransferase ZDHHC15 (EC 2.3.1.-)(Zinc finger DHHC domain-containing protein 15)(DHHC-15) [Source:UniProtKB/Swiss-Prot;Acc:Q96MV8]
MARK2	Post-Translational Modification	YBL019W	2.66521	ENSP00000364126	APEX2		DNA-(apurinic or apyrimidinic site) lyase 2 (EC 4.2.99.18)(Apurinic-apyrimidinic endonuclease 2)(AP endonuclease 2)(APEX nuclease 2)(APEX nuclease-like 2)(AP endonuclease XTH2) [Source:UniProtKB/Swiss-Prot;Acc:Q9UBZ4]
MARK2	Post-Translational Modification	YMR201C	2.98542	ENSP00000364270	XPA	Cell Death and Survival	DNA-repair protein complementing XP-A cells (Xeroderma pigmentosum group A-complementing protein) [Source:UniProtKB/Swiss-Prot;Acc:P23025]
MARK2	Post-Translational Modification	YML121W	2.98226	ENSP00000369899	RRAGA	Cell Death and Survival	Ras-related GTP-binding protein A (Rag A)(RagA)(Adenovirus E3 14.7 kDa-interacting protein 1)(FIP-1) [Source:UniProtKB/Swiss-Prot;Acc:Q7L523]
MARK2	Post-Translational Modification	YOR011W	2.90292	ENSP00000371818	ABCA3	Cell Death and Survival	ATP-binding cassette sub-family A member 3 (ATP-binding cassette transporter 3)(ATP-binding cassette 3)(ABC-C transporter) [Source:UniProtKB/Swiss-Prot;Acc:Q99758]
MARK2	Post-Translational Modification	YBR241C	2.47775	ENSP00000380214	SLC2A1		Solute carrier family 2, facilitated glucose transporter member 1 (Glucose transporter type 1, erythrocyte/brain)(GLUT-1)(HepG2 glucose transporter) [Source:UniProtKB/Swiss-Prot;Acc:P11166]
MARK2	Post-Translational Modification	YDR107C	1.99331	ENSP00000381104	TM9SF4		Transmembrane 9 superfamily member 4 Precursor [Source:UniProtKB/Swiss-Prot;Acc:Q92544]
MGC42105		YDR105C	2.3721	ENSP00000255175	SERINC3	Small Molecule Biochemistry	Tumor differentially expressed protein 1. [Source:Uniprot/SWISSPROT;Acc:Q13530]
MGC42105		YJL130C	2.05563	ENSP00000264705	CAD	Small Molecule Biochemistry	CAD protein [Includes Glutamine-dependent carbamoyl-phosphate synthase(EC 6.3.5.5);Aspartate carbamoyltransferase(EC 2.1.3.2);Dihydroorotase(EC 3.5.2.3)] [Source:UniProtKB/Swiss-Prot;Acc:P27708]
MGC42105		YLR059C	2.30876	ENSP00000265881	REXO2	Nucleic Acid Metabolism	Oligoribonuclease, mitochondrial precursor (EC 3.1.-.-) (Small fragment nuclease) (RNA exonuclease 2 homolog). [Source:Uniprot/SWISSPROT;Acc:Q9Y3B8]
MGC42105		YDR255C	2.12449	ENSP00000283632	RMND5A		Protein RMD5 homolog A [Source:UniProtKB/Swiss-Prot;Acc:Q9H871]
MGC42105		YDL134C	2.05885	ENSP00000384493	PPP2CB		Serine/threonine-protein phosphatase 2A catalytic subunit beta isoform (PP2A-beta)(EC 3.1.3.16) [Source:UniProtKB/Swiss-Prot;Acc:P62714]
PAK1	Cellular Assembly and Organization	YBR186W	3.42286	ENSP00000166345	TRIP13		Thyroid receptor interacting protein 13 (TRIP-13) (Fragment). [Source:Uniprot/SWISSPROT;Acc:Q15645]
PAK1	Cellular Assembly and Organization	YDR128W	2.24338	ENSP00000205064	WDR59		WD repeat domain 59 [Source:RefSeq_peptide;Acc:NP_085058]
PAK1	Cellular Assembly and Organization	YLR099C	3.15174	ENSP00000216327	ABHD4	Small Molecule Biochemistry	Abhydrolase domain containing protein 4. [Source:Uniprot/SWISSPROT;Acc:Q8TB40]
PAK1	Cellular Assembly and Organization	YDR214W	2.45102	ENSP00000216479	AHSA1	Cell Death and Survival	Activator of 90 kDa heat shock protein ATPase homolog 1 (AHA1) (p38). [Source:Uniprot/SWISSPROT;Acc:O95433]
PAK1	Cellular Assembly and Organization	YNL286W	3.47411	ENSP00000218364	HTATSF1		HIV TAT specific factor 1 [Source:RefSeq_peptide;Acc:NP_055315]
PAK1	Cellular Assembly and Organization	YOR007C	4.08961	ENSP00000221566	SGTA		Small glutamine-rich tetratricopeptide repeat-containing protein A (Vpu-binding protein) (UBP). [Source:Uniprot/SWISSPROT;Acc:O43765]
PAK1	Cellular Assembly and Organization	YMR139W	4.47677	ENSP00000222330	GSK3A	Molecular Transport	Glycogen synthase kinase-3 alpha (EC 2.7.1.37) (GSK-3 alpha). [Source:Uniprot/SWISSPROT;Acc:P49840]
PAK1	Cellular Assembly and Organization	YMR183C	4.49314	ENSP00000222812	STX1A	Small Molecule Biochemistry	Syntaxin-1A (Neuron-specific antigen HPC-1). [Source:Uniprot/SWISSPROT;Acc:Q16623]
PAK1	Cellular Assembly and Organization	YPL232W	4.3108	ENSP00000222812	STX1A	Small Molecule Biochemistry	Syntaxin-1A (Neuron-specific antigen HPC-1). [Source:Uniprot/SWISSPROT;Acc:Q16623]
PAK1	Cellular Assembly and Organization	YIL065C	2.27993	ENSP00000223136	FIS1	Cell Death and Survival	Tetratricopeptide repeat protein 11 (TPR repeat protein 11) (Fis1 homolog). [Source:Uniprot/SWISSPROT;Acc:Q9Y3D6]
PAK1	Cellular Assembly and Organization	YAL005C	3.48937	ENSP00000227378	HSPA8	Cell Death and Survival	Heat shock cognate 71 kDa protein (Heat shock 70 kDa protein 8). [Source:Uniprot/SWISSPROT;Acc:P11142]
PAK1	Cellular Assembly and Organization	YMR292W	3.2918	ENSP00000229314	GOLT1B		UPF0198 protein CGI-141. [Source:Uniprot/SWISSPROT;Acc:Q9Y3E0]
PAK1	Cellular Assembly and Organization	YCR008W	3.19152	ENSP00000230510	TTK	Cell Death and Survival	Dual specificity protein kinase TTK (EC 2.7.12.1)(Phosphotyrosine picked threonine-protein kinase)(PYT) [Source:UniProtKB/Swiss-Prot;Acc:P33981]
PAK1	Cellular Assembly and Organization	YEL016C	2.23516	ENSP00000230565	ENPP5		Ectonucleotide pyrophosphatase/phosphodiesterase 5 precursor (EC 3.1.-.-) (E-NPP5) (NPP-5). [Source:Uniprot/SWISSPROT;Acc:Q9UJA9]
PAK1	Cellular Assembly and Organization	YBR069C	3.54449	ENSP00000231706	SLC7A14		solute carrier family 7 (cationic amino acid transporter, y+ system), member 14 [Source:RefSeq_peptide;Acc:NP_066000]
PAK1	Cellular Assembly and Organization	YNL270C	3.10449	ENSP00000231706	SLC7A14		solute carrier family 7 (cationic amino acid transporter, y+ system), member 14 [Source:RefSeq_peptide;Acc:NP_066000]
PAK1	Cellular Assembly and Organization	YIL001W	2.2226	ENSP00000232744	ABTB1		ankyrin repeat and BTB (POZ) domain containing 1 isoform 2 [Source:RefSeq_peptide;Acc:NP_742024]
PAK1	Cellular Assembly and Organization	YPL057C	3.17813	ENSP00000236709	A4GNT		Alpha-1,4-N-acetylglucosaminyltransferase (Alpha4GnT)(EC 2.4.1.-) [Source:UniProtKB/Swiss-Prot;Acc:Q9UNA3]
PAK1	Cellular Assembly and Organization	YMR130W	4.43035	ENSP00000238379	HDHD3		haloacid dehalogenase-like hydrolase domain containing 3 [Source:RefSeq_peptide;Acc:NP_112496]
PAK1	Cellular Assembly and Organization	YPL244C	4.70133	ENSP00000240333	SLC35B1	Molecular Transport	solute carrier family 35, member B1 [Source:RefSeq_peptide;Acc:NP_005818]
PAK1	Cellular Assembly and Organization	YML018C	2.18507	ENSP00000245680	SLC35F5		solute carrier family 35, member F5 [Source:RefSeq_peptide;Acc:NP_079457]
PAK1	Cellular Assembly and Organization	YBR034C	3.83456	ENSP00000246789	PRMT1		Protein arginine N-methyltransferase 1 (EC 2.1.1.-) (Interferon receptor 1-bound protein 4). [Source:Uniprot/SWISSPROT;Acc:Q99873]
PAK1	Cellular Assembly and Organization	YJL134W	2.76463	ENSP00000247225	SGPP1	Cell Death and Survival	Sphingosine-1-phosphate phosphatase 1 (EC 3.1.3.-) (Sphingosine-1- phosphatase 1) (SPPase1) (Spp1) (hSPPase1). [Source:Uniprot/SWISSPROT;Acc:Q9BX95]
PAK1	Cellular Assembly and Organization	YMR154C	3.53473	ENSP00000253693	CAPN7		Calpain-7 (EC 3.4.22.-)(PalB homolog)(PalBH) [Source:UniProtKB/Swiss-Prot;Acc:Q9Y6W3]
PAK1	Cellular Assembly and Organization	YBR010W	3.41369	ENSP00000254810	H3F3A/H3F3B	Cancer	Histone H3.3. [Source:Uniprot/SWISSPROT;Acc:P84243]
PAK1	Cellular Assembly and Organization	YER057C	2.76407	ENSP00000254878	HRSP12	Protein Synthesis	Ribonuclease UK114 (EC 3.1.-.-) (14.5 kDa translational inhibitor protein) (p14.5) (UK114 antigen homolog). [Source:Uniprot/SWISSPROT;Acc:P52758]
PAK1	Cellular Assembly and Organization	YOR101W	4.15918	ENSP00000256196	RRAS2	DNA Replication, Recombination, and Repair	Ras-related protein R-Ras2 (Ras-like protein TC21) (Teratocarcinoma oncogene). [Source:Uniprot/SWISSPROT;Acc:P62070]
PAK1	Cellular Assembly and Organization	YOL008W	4.24962	ENSP00000257927	COQ10A		Protein COQ10 A, mitochondrial Precursor [Source:UniProtKB/Swiss-Prot;Acc:Q96MF6]
PAK1	Cellular Assembly and Organization	YBL063W	3.53145	ENSP00000260731	KIF11	Cell Death and Survival	Kinesin-like protein KIF11 (Kinesin-related motor protein Eg5) (Kinesin-like spindle protein HKSP) (Thyroid receptor interacting protein 5) (TRIP5) (Kinesin-like protein 1). [Source:Uniprot/SWISSPROT;Acc:P52732]
PAK1	Cellular Assembly and Organization	YLL009C	3.5027	ENSP00000261070	COX17		Cytochrome c oxidase copper chaperone. [Source:Uniprot/SWISSPROT;Acc:Q14061]
PAK1	Cellular Assembly and Organization	YIL007C	3.54923	ENSP00000261817	PSMD9		26S proteasome non-ATPase regulatory subunit 9 (26S proteasome regulatory subunit p27). [Source:Uniprot/SWISSPROT;Acc:O00233]
PAK1	Cellular Assembly and Organization	YOR280C	3.12894	ENSP00000263084	OVCA2		Ovarian cancer-associated gene 2 protein [Source:UniProtKB/Swiss-Prot;Acc:Q8WZ82]
PAK1	Cellular Assembly and Organization	YBL080C	3.30368	ENSP00000263985	PET112	Protein Synthesis	Probable glutamyl-tRNA(Gln) amidotransferase subunit B, mitochondrial precursor (EC 6.3.5.-) (Glu-ADT subunit B) (Cytochrome oxidase assembly factor PET112 homolog). [Source:Uniprot/SWISSPROT;Acc:O75879]
PAK1	Cellular Assembly and Organization	YDL104C	4.97089	ENSP00000264151	OSGEPL1		O-sialoglycoprotein endopeptidase-like 1 [Source:RefSeq_peptide;Acc:NP_071748]
PAK1	Cellular Assembly and Organization	YER177W	3.13768	ENSP00000264335	YWHAE	Cellular Assembly and Organization	14-3-3 protein epsilon (14-3-3E). [Source:Uniprot/SWISSPROT;Acc:P62258]
PAK1	Cellular Assembly and Organization	YBL024W	3.60741	ENSP00000264670	NSUN2		NOL1/NOP2/Sun domain family 2 protein [Source:RefSeq_peptide;Acc:NP_060225]
PAK1	Cellular Assembly and Organization	YJL045W	2.92399	ENSP00000264932	SDHA	Cell Death and Survival	Succinate dehydrogenase [ubiquinone] flavoprotein subunit, mitochondrial precursor (EC 1.3.5.1) (Fp) (Flavoprotein subunit of complex II). [Source:Uniprot/SWISSPROT;Acc:P31040]
PAK1	Cellular Assembly and Organization	YPL006W	2.23578	ENSP00000269228	NPC1	Cell Death and Survival	Niemann-Pick C1 protein precursor. [Source:Uniprot/SWISSPROT;Acc:O15118]
PAK1	Cellular Assembly and Organization	YHR162W	2.70297	ENSP00000271373	MPC2		Brain protein 44. [Source:Uniprot/SWISSPROT;Acc:O95563]
PAK1	Cellular Assembly and Organization	YLL010C	4.47133	ENSP00000273062	CTDSP1		Carboxy-terminal domain RNA polymerase II polypeptide A small phosphatase 1 (EC 3.1.3.16) (Nuclear LIM interactor-interacting factor 3) (NLI-interacting factor 3) (NLI-IF). [Source:Uniprot/SWISSPROT;Acc:Q9GZU7]
PAK1	Cellular Assembly and Organization	YEL038W	1.96067	ENSP00000273920	ENOPH1	Small Molecule Biochemistry	E-1 enzyme [Source:RefSeq_peptide;Acc:NP_067027]
PAK1	Cellular Assembly and Organization	YML059C	4.67068	ENSP00000277531	PNPLA7		Patatin-like phospholipase domain-containing protein 7 (EC 3.1.1.-) [Source:UniProtKB/Swiss-Prot;Acc:Q6ZV29]
PAK1	Cellular Assembly and Organization	YCL033C	2.78566	ENSP00000277598	MSRB2		Methionine-R-sulfoxide reductase B2 (EC 1.8.4.-). [Source:Uniprot/SWISSPROT;Acc:Q9Y3D2]
PAK1	Cellular Assembly and Organization	YOR375C	3.00324	ENSP00000277865	GLUD1	Cell Death and Survival	Glutamate dehydrogenase 1, mitochondrial precursor (EC 1.4.1.3) (GDH). [Source:Uniprot/SWISSPROT;Acc:P00367]
PAK1	Cellular Assembly and Organization	YJR024C	3.16445	ENSP00000278359	APIP	Cell Death and Survival	APAF1-interacting protein [Source:UniProtKB/Swiss-Prot;Acc:Q96GX9]
PAK1	Cellular Assembly and Organization	YJR014W	2.44016	ENSP00000280557	DENR		Density-regulated protein (DRP) (DRP1 protein) (Smooth muscle cell associated protein 3) (SMAP-3). [Source:Uniprot/SWISSPROT;Acc:O43583]
PAK1	Cellular Assembly and Organization	YHL017W	4.16215	ENSP00000283206	TMEM87B		Transmembrane protein 87B Precursor [Source:UniProtKB/Swiss-Prot;Acc:Q96K49]
PAK1	Cellular Assembly and Organization	YPL046C	4.09338	ENSP00000284811	TCEB1	Cancer	Transcription elongation factor B polypeptide 1 (RNA polymerase II transcription factor SIII subunit C)(SIII p15)(Elongin 15 kDa subunit)(Elongin-C)(EloC) [Source:UniProtKB/Swiss-Prot;Acc:Q15369]
PAK1	Cellular Assembly and Organization	YLR207W	2.89671	ENSP00000284951	SEL1L2		OTTHUMP00000030307 (Fragment). [Source:Uniprot/SPTREMBL;Acc:Q5TEA6]
PAK1	Cellular Assembly and Organization	YAL029C	3.10684	ENSP00000285039	MYO5B	Molecular Transport	Myosin-5B (Myosin Vb). [Source:Uniprot/SWISSPROT;Acc:Q9ULV0]
PAK1	Cellular Assembly and Organization	YJR025C	3.66415	ENSP00000294973	HAAO	Small Molecule Biochemistry	3-hydroxyanthranilate 3,4-dioxygenase (EC 1.13.11.6) (3-HAO) (3- hydroxyanthranilic acid dioxygenase) (3-hydroxyanthranilate oxygenase). [Source:Uniprot/SWISSPROT;Acc:P46952]
PAK1	Cellular Assembly and Organization	YDR294C	3.80712	ENSP00000299297	SGPL1	Cell Death and Survival	Sphingosine-1-phosphate lyase 1 (EC 4.1.2.27) (SP-lyase) (hSPL) (Sphingosine-1-phosphate aldolase). [Source:Uniprot/SWISSPROT;Acc:O95470]
PAK1	Cellular Assembly and Organization	YJL187C	3.86776	ENSP00000299613	WEE1	Cell Death and Survival	Wee1-like protein kinase (EC 2.7.10.2)(Wee1A kinase)(WEE1hu) [Source:UniProtKB/Swiss-Prot;Acc:P30291]
PAK1	Cellular Assembly and Organization	YBL049W	3.65981	ENSP00000300022	YPEL4		Yippee-like protein 4. [Source:Uniprot/SWISSPROT;Acc:Q96NS1]
PAK1	Cellular Assembly and Organization	YOL059W	4.48313	ENSP00000301149	GPD1	Nucleic Acid Metabolism	Glycerol-3-phosphate dehydrogenase [NAD+], cytoplasmic (EC 1.1.1.8) (GPD-C) (GPDH-C). [Source:Uniprot/SWISSPROT;Acc:P21695]
PAK1	Cellular Assembly and Organization	YEL009C	4.42881	ENSP00000303315	JUNB	Protein Synthesis	Transcription factor jun-B [Source:UniProtKB/Swiss-Prot;Acc:P17275]
PAK1	Cellular Assembly and Organization	YJR048W	2.23101	ENSP00000307786	CYCS	Cell Death and Survival	Cytochrome c. [Source:Uniprot/SWISSPROT;Acc:P99999]
PAK1	Cellular Assembly and Organization	YPL247C	2.73526	ENSP00000308344	DCAF7		WD-repeat protein 68 (WD-repeat protein An11 homolog). [Source:Uniprot/SWISSPROT;Acc:P61962]
PAK1	Cellular Assembly and Organization	YPL022W	2.94155	ENSP00000310520	ERCC4	DNA Replication, Recombination, and Repair	DNA repair endonuclease XPF (EC 3.1.-.-) (DNA excision repair protein ERCC-4) (DNA-repair protein complementing XP-F cell) (Xeroderma pigmentosum group F complementing protein). [Source:Uniprot/SWISSPROT;Acc:Q92889]
PAK1	Cellular Assembly and Organization	YML131W	2.09155	ENSP00000311572	PTGR1	Cell Death and Survival	NADP-dependent leukotriene B4 12-hydroxydehydrogenase (EC 1.3.1.74) (15-oxoprostaglandin 13-reductase) (EC 1.3.1.48). [Source:Uniprot/SWISSPROT;Acc:Q14914]
PAK1	Cellular Assembly and Organization	YOR156C	2.00042	ENSP00000311778	ZMIZ2		Zinc finger MIZ domain-containing protein 2 (PIAS-like protein Zimp7) [Source:UniProtKB/Swiss-Prot;Acc:Q8NF64]
PAK1	Cellular Assembly and Organization	YHR206W	2.89694	ENSP00000313243	HSF5		Heat shock factor protein 5 (HSF 5)(Heat shock transcription factor 5)(HSTF 5) [Source:UniProtKB/Swiss-Prot;Acc:Q4G112]
PAK1	Cellular Assembly and Organization	YBR042C	3.28867	ENSP00000314036	AGPAT4		1-acyl-sn-glycerol-3-phosphate acyltransferase delta (EC 2.3.1.51) (1- AGP acyltransferase 4) (1-AGPAT 4) (Lysophosphatidic acid acyltransferase-delta) (LPAAT-delta) (1-acylglycerol-3-phosphate O- acyltransferase 4). [Source:Uniprot/SWISSPROT;Acc:Q9NRZ5]
PAK1	Cellular Assembly and Organization	YDL226C	4.59571	ENSP00000314615	ARFGAP1	Cellular Assembly and Organization	ADP-ribosylation factor GTPase activating protein 1 (ADP-ribosylation factor 1 GTPase activating protein) (ARF1 GAP) (ARF1-directed GTPase- activating protein) (GAP protein). [Source:Uniprot/SWISSPROT;Acc:Q8N6T3]
PAK1	Cellular Assembly and Organization	YDR009W	3.99031	ENSP00000316632	GALK2	Cell Death and Survival	N-acetylgalactosamine kinase (EC 2.7.1.-) (GalNAc kinase) (Galactokinase 2). [Source:Uniprot/SWISSPROT;Acc:Q01415]
PAK1	Cellular Assembly and Organization	YBR020W	2.22697	ENSP00000316632	GALK2	Cell Death and Survival	N-acetylgalactosamine kinase (EC 2.7.1.-) (GalNAc kinase) (Galactokinase 2). [Source:Uniprot/SWISSPROT;Acc:Q01415]
PAK1	Cellular Assembly and Organization	YER172C	1.9689	ENSP00000317123	SNRNP200	DNA Replication, Recombination, and Repair	U5 small nuclear ribonucleoprotein 200 kDa helicase (EC 3.6.1.-) (U5 snRNP-specific 200 kDa protein) (U5-200KD) (Activating signal cointegrator 1 complex subunit 3-like 1). [Source:Uniprot/SWISSPROT;Acc:O75643]
PAK1	Cellular Assembly and Organization	YHR114W	3.59792	ENSP00000320117	TRIP10		Cdc42-interacting protein 4 (Thyroid receptor-interacting protein 10) (TRIP-10). [Source:Uniprot/SWISSPROT;Acc:Q15642]
PAK1	Cellular Assembly and Organization	YBL091C	3.22718	ENSP00000325312	METAP2	Cell Death and Survival	Methionine aminopeptidase 2 (EC 3.4.11.18) (MetAP 2) (Peptidase M 2) (Initiation factor 2 associated 67 kDa glycoprotein) (p67) (p67eIF2). [Source:Uniprot/SWISSPROT;Acc:P50579]
PAK1	Cellular Assembly and Organization	YMR186W	2.81887	ENSP00000325875	HSP90AB1	Cell Death and Survival	Heat shock protein HSP 90-beta (HSP 90)(HSP 84) [Source:UniProtKB/Swiss-Prot;Acc:P08238]
PAK1	Cellular Assembly and Organization	YPL240C	2.11876	ENSP00000325875	HSP90AB1	Cell Death and Survival	Heat shock protein HSP 90-beta (HSP 90)(HSP 84) [Source:UniProtKB/Swiss-Prot;Acc:P08238]
PAK1	Cellular Assembly and Organization	YOR375C	3.00324	ENSP00000327589	GLUD2	Small Molecule Biochemistry	Glutamate dehydrogenase 2, mitochondrial precursor (EC 1.4.1.3) (GDH). [Source:Uniprot/SWISSPROT;Acc:P49448]
PAK1	Cellular Assembly and Organization	YAL036C	2.94774	ENSP00000329715	DRG1		Developmentally regulated GTP-binding protein 1 (DRG 1). [Source:Uniprot/SWISSPROT;Acc:Q9Y295]
PAK1	Cellular Assembly and Organization	YHL010C	3.21011	ENSP00000330813	BRAP		BRCA1-associated protein (EC 6.3.2.-) (BRAP2) (Impedes mitogenic signal propagation) (IMP) (RING finger protein 52). [Source:Uniprot/SWISSPROT;Acc:Q7Z569]
PAK1	Cellular Assembly and Organization	YER174C	2.49691	ENSP00000330836	GLRX3		Glutaredoxin-3 (Thioredoxin-like protein 2)(PKC-interacting cousin of thioredoxin)(PKC-theta-interacting protein)(PKCq-interacting protein) [Source:UniProtKB/Swiss-Prot;Acc:O76003]
PAK1	Cellular Assembly and Organization	YMR009W	2.45138	ENSP00000333666	ADI1	Cell Death and Survival	membrane-type 1 matrix metalloproteinase cytoplasmic tail binding protein-1 [Source:RefSeq_peptide;Acc:NP_060739]
PAK1	Cellular Assembly and Organization	YOR347C	3.79799	ENSP00000334983	PKM	Cell Death and Survival	Pyruvate kinase isozymes M1/M2 (EC 2.7.1.40)(Pyruvate kinase muscle isozyme)(Pyruvate kinase 2/3)(Cytosolic thyroid hormone-binding protein)(CTHBP)(THBP1) [Source:UniProtKB/Swiss-Prot;Acc:P14618]
PAK1	Cellular Assembly and Organization	YOR091W	3.63711	ENSP00000338788	ZC3H15		erythropoietin 4 immediate early response [Source:RefSeq_peptide;Acc:NP_060941]
PAK1	Cellular Assembly and Organization	YMR246W	2.30698	ENSP00000339787	ACSL4	Cell Death and Survival	Long-chain-fatty-acid--CoA ligase 4 (EC 6.2.1.3) (Long-chain acyl-CoA synthetase 4) (LACS 4). [Source:Uniprot/SWISSPROT;Acc:O60488]
PAK1	Cellular Assembly and Organization	YCR005C	2.94002	ENSP00000342056	CS	Small Molecule Biochemistry	Citrate synthase, mitochondrial precursor (EC 2.3.3.1). [Source:Uniprot/SWISSPROT;Acc:O75390]
PAK1	Cellular Assembly and Organization	YER089C	2.71649	ENSP00000342778	PPM1G	Cell Death and Survival	Protein phosphatase 2C gamma isoform (EC 3.1.3.16) (PP2C-gamma) (Protein phosphatase magnesium-dependent 1 gamma) (Protein phosphatase 1C). [Source:Uniprot/SWISSPROT;Acc:O15355]
PAK1	Cellular Assembly and Organization	YPL127C	2.04472	ENSP00000344504	H1F0		Histone H1.0 (H1(0)) (Histone H1'). [Source:Uniprot/SWISSPROT;Acc:P07305]
PAK1	Cellular Assembly and Organization	YJR100C	3.97347	ENSP00000345494	PLSCR1	Cell Death and Survival	Phospholipid scramblase 1 (PL scramblase 1) (Ca(2+)-dependent phospholipid scramblase 1) (Erythrocyte phospholipid scramblase) (MmTRA1b). [Source:Uniprot/SWISSPROT;Acc:O15162]
PAK1	Cellular Assembly and Organization	YMR110C	2.07031	ENSP00000345774	ALDH3A2	Small Molecule Biochemistry	Fatty aldehyde dehydrogenase (EC 1.2.1.3) (Aldehyde dehydrogenase, microsomal) (Aldehyde dehydrogenase family 3 member A2). [Source:Uniprot/SWISSPROT;Acc:P51648]
PAK1	Cellular Assembly and Organization	YMR008C	2.32006	ENSP00000346228	PLA2G4C	Small Molecule Biochemistry	Cytosolic phospholipase A2 gamma Precursor (cPLA2-gamma)(EC 3.1.1.4)(Phospholipase A2 group IVC) [Source:UniProtKB/Swiss-Prot;Acc:Q9UP65]
PAK1	Cellular Assembly and Organization	YDR063W	2.24379	ENSP00000346789	GMFB		Glia maturation factor beta (GMF-beta) [Source:UniProtKB/Swiss-Prot;Acc:P60983]
PAK1	Cellular Assembly and Organization	YDR185C	3.71293	ENSP00000348206	SLMO2		Protein slowmo homolog 2 [Source:UniProtKB/Swiss-Prot;Acc:Q9Y3B1]
PAK1	Cellular Assembly and Organization	YJR131W	2.37856	ENSP00000348959	MAN1A2	Small Molecule Biochemistry	Mannosyl-oligosaccharide 1,2-alpha-mannosidase IB (EC 3.2.1.113)(Processing alpha-1,2-mannosidase IB)(Alpha-1,2-mannosidase IB)(Mannosidase alpha class 1A member 2) [Source:UniProtKB/Swiss-Prot;Acc:O60476]
PAK1	Cellular Assembly and Organization	YHL032C	3.62511	ENSP00000351706	GK2	Cellular Assembly and Organization	Glycerol kinase 2 (Glycerokinase 2)(GK 2)(EC 2.7.1.30)(Glycerol kinase, testis specific 2)(ATP:glycerol 3-phosphotransferase) [Source:UniProtKB/Swiss-Prot;Acc:Q14410]
PAK1	Cellular Assembly and Organization	YAL019W	3.17526	ENSP00000351947	SMARCAD1	Cancer	SWI/SNF-related, matrix associated, actin-dependent regulator of chromatin subfamily A containing DEAD/H box 1 (Helicase 1) (hHEL1). [Source:Uniprot/SWISSPROT;Acc:Q9H4L7]
PAK1	Cellular Assembly and Organization	YHR028C	3.27764	ENSP00000353731	DPP4	Cell Death and Survival	Dipeptidyl peptidase 4 (EC 3.4.14.5) (Dipeptidyl peptidase IV) (DPP IV) (T-cell activation antigen CD26) (TP103) (Adenosine deaminase complexing protein 2) (ADABP) [Contains: Dipeptidyl peptidase 4 membrane form (Dipeptidyl peptidase IV membrane form); Di [Source:Uniprot/SWISSPROT;Acc:P27487]
PAK1	Cellular Assembly and Organization	YOR219C	3.00798	ENSP00000353731	DPP4	Cell Death and Survival	Dipeptidyl peptidase 4 (EC 3.4.14.5) (Dipeptidyl peptidase IV) (DPP IV) (T-cell activation antigen CD26) (TP103) (Adenosine deaminase complexing protein 2) (ADABP) [Contains: Dipeptidyl peptidase 4 membrane form (Dipeptidyl peptidase IV membrane form); Di [Source:Uniprot/SWISSPROT;Acc:P27487]
PAK1	Cellular Assembly and Organization	YJR066W	3.85773	ENSP00000354558	MTOR	Cellular Assembly and Organization	FKBP12-rapamycin complex-associated protein (FK506-binding protein 12-rapamycin complex-associated protein 1)(Rapamycin target protein)(RAPT1)(Mammalian target of rapamycin)(mTOR) [Source:UniProtKB/Swiss-Prot;Acc:P42345]
PAK1	Cellular Assembly and Organization	YEL053C	2.30435	ENSP00000354972	NAA35	Cell Death and Survival	Protein MAK10 homolog (Embryonic growth-associated protein homolog) [Source:UniProtKB/Swiss-Prot;Acc:Q5VZE5]
PAK1	Cellular Assembly and Organization	YBR010W	3.41369	ENSP00000355781	H3F3A/H3F3B	Cancer	Histone H3.3 [Source:UniProtKB/Swiss-Prot;Acc:P84243]
PAK1	Cellular Assembly and Organization	YMR027W	2.63988	ENSP00000356263	C6orf211		UPF0364 protein C6orf211 [Source:UniProtKB/Swiss-Prot;Acc:Q9H993]
PAK1	Cellular Assembly and Organization	YMR008C	2.32006	ENSP00000356436	PLA2G4A	Cell Death and Survival	phospholipase A2, group IVA (cytosolic, calcium-dependent) [Source:HGNC Symbol;Acc:9035]
PAK1	Cellular Assembly and Organization	YDR152W	4.28257	ENSP00000357579	RWDD1		RWD domain-containing protein 1 (DRG family-regulatory protein 2) [Source:UniProtKB/Swiss-Prot;Acc:Q9H446]
PAK1	Cellular Assembly and Organization	YOL052C	3.57571	ENSP00000357880	AMD1	Small Molecule Biochemistry	S-adenosylmethionine decarboxylase proenzyme (AdoMetDC)(SamDC)(EC 4.1.1.50) [Contains S-adenosylmethionine decarboxylase alpha chain;S-adenosylmethionine decarboxylase beta chain] [Source:UniProtKB/Swiss-Prot;Acc:P17707]
PAK1	Cellular Assembly and Organization	YBL003C	4.22913	ENSP00000358155	HIST2H2AA3/HIST2H2AA4		Histone H2A type 2-A (H2A.2)(H2A/o) [Source:UniProtKB/Swiss-Prot;Acc:Q6FI13]
PAK1	Cellular Assembly and Organization	YBL003C	4.22913	ENSP00000358158	HIST2H2AA3/HIST2H2AA4		Histone H2A type 2-A (H2A.2)(H2A/o) [Source:UniProtKB/Swiss-Prot;Acc:Q6FI13]
PAK1	Cellular Assembly and Organization	YIL121W	3.84495	ENSP00000358515	SLC22A15		solute carrier family 22, member 15 [Source:HGNC Symbol;Acc:20301]
PAK1	Cellular Assembly and Organization	YBR043C	3.11746	ENSP00000358515	SLC22A15		solute carrier family 22, member 15 [Source:HGNC Symbol;Acc:20301]
PAK1	Cellular Assembly and Organization	YNL323W	4.25427	ENSP00000359067	TMEM30A		Cell cycle control protein 50A (Transmembrane protein 30A) [Source:UniProtKB/Swiss-Prot;Acc:Q9NV96]
PAK1	Cellular Assembly and Organization	YOR016C	2.93503	ENSP00000359313	TMED5		Transmembrane emp24 domain-containing protein 5 Precursor [Source:UniProtKB/Swiss-Prot;Acc:Q9Y3A6]
PAK1	Cellular Assembly and Organization	YER005W	3.40487	ENSP00000359520	ENTPD7	DNA Replication, Recombination, and Repair	Ectonucleoside triphosphate diphosphohydrolase 7 (NTPDase 7)(EC 3.6.1.-)(Lysosomal apyrase-like protein 1) [Source:UniProtKB/Swiss-Prot;Acc:Q9NQZ7]
PAK1	Cellular Assembly and Organization	YPL203W	3.59783	ENSP00000359719	PRKACB	Cell Death and Survival	cAMP-dependent protein kinase catalytic subunit beta (PKA C-beta)(EC 2.7.11.11) [Source:UniProtKB/Swiss-Prot;Acc:P22694]
PAK1	Cellular Assembly and Organization	YER007C-A	3.23193	ENSP00000360365	MCTS1	Cell Death and Survival	Malignant T cell amplified sequence 1 (MCT-1)(Multiple copies T-cell malignancies) [Source:UniProtKB/Swiss-Prot;Acc:Q9ULC4]
PAK1	Cellular Assembly and Organization	YIL044C	3.69614	ENSP00000361803	SMAP2		Stromal membrane-associated protein 2 (Stromal membrane-associated protein 1-like) [Source:UniProtKB/Swiss-Prot;Acc:Q8WU79]
PAK1	Cellular Assembly and Organization	YPL013C	2.64849	ENSP00000362036	MRPS16		mitochondrial ribosomal protein S16 [Source:HGNC Symbol;Acc:14048]
PAK1	Cellular Assembly and Organization	YDR289C	2.94057	ENSP00000362532	RPRD1B		Regulation of nuclear pre-mRNA domain-containing protein 1B (Cell cycle-related and expression-elevated protein in tumor) [Source:UniProtKB/Swiss-Prot;Acc:Q9NQG5]
PAK1	Cellular Assembly and Organization	YPL098C	4.54675	ENSP00000363191	ROMO1		reactive oxygen species modulator 1 [Source:HGNC Symbol;Acc:16185]
PAK1	Cellular Assembly and Organization	YJL036W	2.35072	ENSP00000363349	SNX30		Sorting nexin-30 [Source:UniProtKB/Swiss-Prot;Acc:Q5VWJ9]
PAK1	Cellular Assembly and Organization	YOR161C	3.22105	ENSP00000363852	BMS1		solute carrier family 44 (choline transporter), member 1 [Source:HGNC Symbol;Acc:18798]
PAK1	Cellular Assembly and Organization	YOL075C	2.24301	ENSP00000363868	ABCA1	Molecular Transport	ATP-binding cassette sub-family A member 1 (ATP-binding cassette transporter 1)(ATP-binding cassette 1)(ABC-1)(Cholesterol efflux regulatory protein) [Source:UniProtKB/Swiss-Prot;Acc:O95477]
PAK1	Cellular Assembly and Organization	YCL056C	3.8494	ENSP00000364280
PAK1	Cellular Assembly and Organization	YBR147W	2.58892	ENSP00000364295	PQLC2	Cell Death and Survival	PQ-loop repeat-containing protein 2 [Source:UniProtKB/Swiss-Prot;Acc:Q6ZP29]
PAK1	Cellular Assembly and Organization	YBL003C	4.22913	ENSP00000364310	H2AFX	Cell Death and Survival	Histone H2A.x (H2a/x) [Source:UniProtKB/Swiss-Prot;Acc:P16104]
PAK1	Cellular Assembly and Organization	YBR010W	3.41369	ENSP00000364327	H3F3A/H3F3B	Cancer	Histone H3.3 [Source:UniProtKB/Swiss-Prot;Acc:P84243]
PAK1	Cellular Assembly and Organization	YMR176W	2.56716	ENSP00000364550	KDM5C		Histone demethylase JARID1C (EC 1.14.11.-)(Jumonji/ARID domain-containing protein 1C)(Protein SmcX)(Protein Xe169) [Source:UniProtKB/Swiss-Prot;Acc:P41229]
PAK1	Cellular Assembly and Organization	YEL042W	2.81381	ENSP00000365840	ENTPD6	DNA Replication, Recombination, and Repair	Ectonucleoside triphosphate diphosphohydrolase 6 (NTPDase 6)(EC 3.6.1.6)(CD39 antigen-like 2) [Source:UniProtKB/Swiss-Prot;Acc:O75354]
PAK1	Cellular Assembly and Organization	YBL003C	4.22913	ENSP00000367022	HIST1H2AC		Histone H2A type 1-C (H2A/l) [Source:UniProtKB/Swiss-Prot;Acc:Q93077]
PAK1	Cellular Assembly and Organization	YLR170C	3.99226	ENSP00000369645	AP1S2		AP-1 complex subunit sigma-2 (Adapter-related protein complex 1 sigma-1B subunit)(Adaptor protein complex AP-1 sigma-1B subunit)(Sigma-adaptin 1B)(Sigma1B-adaptin)(Golgi adaptor HA1/AP1 adaptin sigma-1B subunit)(Clathrin assembly protein complex 1 sigma-1B small chain)(Sigma 1B subunit of AP-1 clathrin) [Source:UniProtKB/Swiss-Prot;Acc:P56377]
PAK1	Cellular Assembly and Organization	YDR146C	3.62466	ENSP00000369774	ZNF763		Zinc finger protein 763 [Source:UniProtKB/Swiss-Prot;Acc:Q0D2J5]
PAK1	Cellular Assembly and Organization	YLR038C	3.16796	ENSP00000376037	COX6B1		Cytochrome c oxidase subunit VIb isoform 1 (COX VIb-1) [Source:UniProtKB/Swiss-Prot;Acc:P14854]
PAK1	Cellular Assembly and Organization	YOR185C	3.99872	ENSP00000376176	RAN	Molecular Transport	GTP-binding nuclear protein Ran (GTPase Ran)(Ras-related nuclear protein)(Ras-like protein TC4)(Androgen receptor-associated protein 24) [Source:UniProtKB/Swiss-Prot;Acc:P62826]
PAK1	Cellular Assembly and Organization	YOR347C	3.79799	ENSP00000376214	PKLR		Pyruvate kinase isozymes R/L (EC 2.7.1.40)(R-type/L-type pyruvate kinase)(Red cell/liver pyruvate kinase)(Pyruvate kinase 1) [Source:UniProtKB/Swiss-Prot;Acc:P30613]
PAK1	Cellular Assembly and Organization	YOL031C	4.12138	ENSP00000378294	SIL1	Cellular Assembly and Organization	SIL1 nucleotide exchange factor [Source:HGNC Symbol;Acc:24624]
PAK1	Cellular Assembly and Organization	YHR032W	4.98228	ENSP00000378951	SLC47A1	Molecular Transport	Multidrug and toxin extrusion protein 1 (hMATE-1)(MATE-1)(Solute carrier family 47 member 1) [Source:UniProtKB/Swiss-Prot;Acc:Q96FL8]
PAK1	Cellular Assembly and Organization	YDL161W	4.34671	ENSP00000378985	EPN2		Epsin-2 (EPS-15-interacting protein 2) [Source:UniProtKB/Swiss-Prot;Acc:O95208]
PAK1	Cellular Assembly and Organization	YDR244W	3.46602	ENSP00000379877	PEX5	Small Molecule Biochemistry	Peroxisomal targeting signal 1 receptor (PTS1 receptor)(PTS1R)(Peroxisome receptor 1)(Peroxisomal C-terminal targeting signal import receptor)(PTS1-BP)(Peroxin-5) [Source:UniProtKB/Swiss-Prot;Acc:P50542]
PAK1	Cellular Assembly and Organization	YMR008C	2.32006	ENSP00000380442	PLA2G4F		Cytosolic phospholipase A2 zeta (cPLA2-zeta)(EC 3.1.1.4)(Phospholipase A2 group IVF) [Source:UniProtKB/Swiss-Prot;Acc:Q68DD2]
PAK1	Cellular Assembly and Organization	YBL082C	4.88178	ENSP00000380793	ALG3		Dolichyl-P-Man:Man(5)GlcNAc(2)-PP-dolichyl mannosyltransferase (EC 2.4.1.130)(Dol-P-Man-dependent alpha(1-3)-mannosyltransferase)(Dolichyl-phosphate-mannose--glycolipid alpha-mannosyltransferase)(Asparagine-linked glycosylation protein 3)(Not56-like protein) [Source:UniProtKB/Swiss-Prot;Acc:Q92685]
PAK1	Cellular Assembly and Organization	YLR083C	3.35901	ENSP00000381104	TM9SF4		Transmembrane 9 superfamily member 4 Precursor [Source:UniProtKB/Swiss-Prot;Acc:Q92544]
PAK1	Cellular Assembly and Organization	YDL131W	4.10879	ENSP00000381654	HMGCLL1	Small Molecule Biochemistry	3-hydroxymethyl-3-methylglutaryl-CoA lyase-like 1 [Source:HGNC Symbol;Acc:21359]
PAK1	Cellular Assembly and Organization	YLR133W	3.83292	ENSP00000384400	CHKB	Cell Cycle	Choline/ethanolamine kinase [Includes Choline kinase beta(CK)(EC 2.7.1.32);Ethanolamine kinase(EK)(EC 2.7.1.82)] [Source:UniProtKB/Swiss-Prot;Acc:Q9Y259]
PAK1	Cellular Assembly and Organization	YDL134C	2.50229	ENSP00000384493	PPP2CB		Serine/threonine-protein phosphatase 2A catalytic subunit beta isoform (PP2A-beta)(EC 3.1.3.16) [Source:UniProtKB/Swiss-Prot;Acc:P62714]
PAK1	Cellular Assembly and Organization	YCL011C	3.87619	ENSP00000385269	ELAVL1	Cell Death and Survival	ELAV-like protein 1 (Hu-antigen R)(HuR) [Source:UniProtKB/Swiss-Prot;Acc:Q15717]
PAK1	Cellular Assembly and Organization	YPL152W	3.73762	ENSP00000385881	PPP2R4		Serine/threonine-protein phosphatase 2A regulatory subunit B' (PP2A, subunit B', PR53 isoform)(Phosphotyrosyl phosphatase activator)(PTPA) [Source:UniProtKB/Swiss-Prot;Acc:Q15257]
PAK1	Cellular Assembly and Organization	YML036W	2.21211	ENSP00000386936	TPRKB		TP53RK binding protein [Source:HGNC Symbol;Acc:24259]
PAK1	Cellular Assembly and Organization	YBR187W	4.78662	ENSP00000387345	SLC38A11		histone cluster 2, H2aa4 [Source:HGNC Symbol;Acc:29668]
PAK2	Post-Translational Modification	YPL140C	2.26306	ENSP00000178640	MAP2K5	Cell Death and Survival	Dual specificity mitogen-activated protein kinase kinase 5 (MAP kinase kinase 5)(MAPKK 5)(EC 2.7.12.2)(MAPK/ERK kinase 5) [Source:UniProtKB/Swiss-Prot;Acc:Q13163]
PAK2	Post-Translational Modification	YNL155W	2.0239	ENSP00000220669	ZFAND1		AN1-type zinc finger protein 1. [Source:Uniprot/SWISSPROT;Acc:Q8TCF1]
PAK2	Post-Translational Modification	YJR088C	2.72564	ENSP00000220853	EMC2		Tetratricopeptide repeat protein 35 (TPR repeat protein 35) [Source:UniProtKB/Swiss-Prot;Acc:Q15006]
PAK2	Post-Translational Modification	YDR155C	3.76047	ENSP00000225174	PPIF	Cell Death and Survival	Peptidyl-prolyl cis-trans isomerase, mitochondrial precursor (EC 5.2.1.8) (PPIase) (Rotamase) (Cyclophilin F). [Source:Uniprot/SWISSPROT;Acc:P30405]
PAK2	Post-Translational Modification	YJR009C	2.5564	ENSP00000229239	GAPDH	Cell Death and Survival	Glyceraldehyde-3-phosphate dehydrogenase, liver (EC 1.2.1.12) (GAPDH). [Source:Uniprot/SWISSPROT;Acc:P04406]
PAK2	Post-Translational Modification	YCL025C	2.70514	ENSP00000231706	SLC7A14		solute carrier family 7 (cationic amino acid transporter, y+ system), member 14 [Source:RefSeq_peptide;Acc:NP_066000]
PAK2	Post-Translational Modification	YJR084W	2.79173	ENSP00000246505	PCID2		PCI domain-containing protein 2 (CSN12-like protein) [Source:UniProtKB/Swiss-Prot;Acc:Q5JVF3]
PAK2	Post-Translational Modification	YMR226C	3.70619	ENSP00000251312	DHRS11		Dehydrogenase/reductase SDR family member 11 Precursor (EC 1.-.-.-) [Source:UniProtKB/Swiss-Prot;Acc:Q6UWP2]
PAK2	Post-Translational Modification	YLL062C	2.15203	ENSP00000255192	BHMT2	Small Molecule Biochemistry	Betaine--homocysteine S-methyltransferase 2 (EC 2.1.1.5) [Source:UniProtKB/Swiss-Prot;Acc:Q9H2M3]
PAK2	Post-Translational Modification	YOR038C	2.37126	ENSP00000263208	HIRA	DNA Replication, Recombination, and Repair	HIRA protein (TUP1-like enhancer of split protein 1). [Source:Uniprot/SWISSPROT;Acc:P54198]
PAK2	Post-Translational Modification	YDR183W	2.87713	ENSP00000264255	TXNDC9		Thioredoxin domain containing protein 9 (Protein 1-4) (ATP binding protein associated with cell differentiation). [Source:Uniprot/SWISSPROT;Acc:O14530]
PAK2	Post-Translational Modification	YHR210C	2.92124	ENSP00000272252	GALM		Aldose 1-epimerase (EC 5.1.3.3)(Galactose mutarotase) [Source:UniProtKB/Swiss-Prot;Acc:Q96C23]
PAK2	Post-Translational Modification	YNL288W	3.11721	ENSP00000273064	RQCD1		RCD1 required for cell differentiation1 homolog [Source:RefSeq_peptide;Acc:NP_005435]
PAK2	Post-Translational Modification	YER166W	2.10285	ENSP00000273859	ATP10D		Potential phospholipid-transporting ATPase VD (EC 3.6.3.1) (ATPVD). [Source:Uniprot/SWISSPROT;Acc:Q9P241]
PAK2	Post-Translational Modification	YBR159W	2.117	ENSP00000278353	HSD17B12		steroid dehydrogenase homolog [Source:RefSeq_peptide;Acc:NP_057226]
PAK2	Post-Translational Modification	YPL206C	2.47688	ENSP00000284116	GDPD1		glycerophosphodiester phosphodiesterase domain containing 1 [Source:RefSeq_peptide;Acc:NP_872375]
PAK2	Post-Translational Modification	YHL013C	2.69509	ENSP00000285420	OTUD6B		OTU domain-containing protein 6B (DUBA-5) [Source:UniProtKB/Swiss-Prot;Acc:Q8N6M0]
PAK2	Post-Translational Modification	YHR121W	2.46503	ENSP00000293406	LSM12		Protein LSM12 homolog [Source:UniProtKB/Swiss-Prot;Acc:Q3MHD2]
PAK2	Post-Translational Modification	YPL081W	2.37186	ENSP00000302896	RPS9	Protein Synthesis	40S ribosomal protein S9. [Source:Uniprot/SWISSPROT;Acc:P46781]
PAK2	Post-Translational Modification	YPL247C	1.96521	ENSP00000308344	DCAF7		WD-repeat protein 68 (WD-repeat protein An11 homolog). [Source:Uniprot/SWISSPROT;Acc:P61962]
PAK2	Post-Translational Modification	YIL155C	2.66063	ENSP00000308610	GPD2	Nucleic Acid Metabolism	Glycerol-3-phosphate dehydrogenase, mitochondrial precursor (EC 1.1.99.5) (GPD-M) (GPDH-M) (mtGPD). [Source:Uniprot/SWISSPROT;Acc:P43304]
PAK2	Post-Translational Modification	YML118W	2.79035	ENSP00000309142	PDE12		2',5'-phosphodiesterase 12 (2'-PDE)(2-PDE)(EC 3.1.4.-) [Source:UniProtKB/Swiss-Prot;Acc:Q6L8Q7]
PAK2	Post-Translational Modification	YPL135W	2.24555	ENSP00000310623	ISCU	Amino Acid Metabolism	NifU-like N-terminal domain containing protein, mitochondrial precursor (NifU-like protein) (Iron-sulfur cluster assembly enzyme ISCU). [Source:Uniprot/SWISSPROT;Acc:Q9H1K1]
PAK2	Post-Translational Modification	YPL206C	2.47688	ENSP00000314124	GDPD3		Glycerophosphodiester phosphodiesterase domain-containing protein 3 (EC 3.1.-.-) [Source:UniProtKB/Swiss-Prot;Acc:Q7L5L3]
PAK2	Post-Translational Modification	YJR044C	3.95477	ENSP00000314625	LEPROTL1		Leptin receptor overlapping transcript-like 1. [Source:Uniprot/SWISSPROT;Acc:O95214]
PAK2	Post-Translational Modification	YJL098W	2.12793	ENSP00000321013	PPP6R1		SAPS domain family member 1 (Protein phosphatase 6, regulatory subunit 1) [Source:UniProtKB/Swiss-Prot;Acc:Q9UPN7]
PAK2	Post-Translational Modification	YOR125C	2.30541	ENSP00000322316	COQ7	Molecular Transport	Ubiquinone biosynthesis protein COQ7 homolog (Coenzyme Q biosynthesis protein 7 homolog) (Timing protein clk-1 homolog). [Source:Uniprot/SWISSPROT;Acc:Q99807]
PAK2	Post-Translational Modification	YOR222W	2.00802	ENSP00000329452	SLC25A21	Molecular Transport	Mitochondrial 2-oxodicarboxylate carrier. [Source:Uniprot/SWISSPROT;Acc:Q9BQT8]
PAK2	Post-Translational Modification	YDR026C	2.2097	ENSP00000333920	TTF1	Cell Death and Survival	transcription termination factor, RNA polymerase I [Source:RefSeq_peptide;Acc:NP_031370]
PAK2	Post-Translational Modification	YDR111C	2.43853	ENSP00000345282	GPT2		alanine aminotransferase 2 [Source:RefSeq_peptide;Acc:NP_597700]
PAK2	Post-Translational Modification	YNL067W	2.49371	ENSP00000346022	RPL9		60S ribosomal protein L9 [Source:UniProtKB/Swiss-Prot;Acc:P32969]
PAK2	Post-Translational Modification	YPL111W	2.14688	ENSP00000349446	ARG1	Cell Death and Survival	Arginase-1 (EC 3.5.3.1) (Type I arginase) (Liver-type arginase). [Source:Uniprot/SWISSPROT;Acc:P05089]
PAK2	Post-Translational Modification	YBR220C	2.70843	ENSP00000352456	SLC33A1	Molecular Transport	acetyl-coenzyme A transporter [Source:RefSeq_peptide;Acc:NP_004724]
PAK2	Post-Translational Modification	YBR139W	2.7687	ENSP00000361562	CTSA	Molecular Transport	Lysosomal protective protein Precursor (EC 3.4.16.5)(Cathepsin A)(Carboxypeptidase C)(Protective protein for beta-galactosidase) [Contains Lysosomal protective protein 32 kDa chain;Lysosomal protective protein 20 kDa chain] [Source:UniProtKB/Swiss-Prot;Acc:P10619]
PAK2	Post-Translational Modification	YEL004W	2.60743	ENSP00000367770	SLC35B4	Molecular Transport	UDP-xylose and UDP-N-acetylglucosamine transporter (Solute carrier family 35 member B4)(YEA4 homolog) [Source:UniProtKB/Swiss-Prot;Acc:Q969S0]
PAK2	Post-Translational Modification	YJL068C	2.27524	ENSP00000367992	ESD		S-formylglutathione hydrolase (FGH)(EC 3.1.2.12)(Esterase D) [Source:UniProtKB/Swiss-Prot;Acc:P10768]
PAK2	Post-Translational Modification	YOR265W	2.52413	ENSP00000369736	TBCA	Cell Signaling	tubulin folding cofactor A [Source:HGNC Symbol;Acc:11579]
PAK2	Post-Translational Modification	YLL001W	2.83331	ENSP00000370388	DNM1L	Cell Death and Survival	Dynamin-1-like protein (EC 3.6.5.5)(Dynamin-like protein)(Dnm1p/Vps1p-like protein)(DVLP)(Dynamin family member proline-rich carboxyl-terminal domain less)(Dymple)(Dynamin-related protein 1)(Dynamin-like protein 4)(Dynamin-like protein IV)(HdynIV) [Source:UniProtKB/Swiss-Prot;Acc:O00429]
PAK2	Post-Translational Modification	YBR187W	3.18322	ENSP00000370736	TMEM165		Transmembrane protein 165 (Transmembrane protein TPARL)(Transmembrane protein PT27) [Source:UniProtKB/Swiss-Prot;Acc:Q9HC07]
PAK2	Post-Translational Modification	YPL058C	3.93426	ENSP00000371818	ABCA3	Cell Death and Survival	ATP-binding cassette sub-family A member 3 (ATP-binding cassette transporter 3)(ATP-binding cassette 3)(ABC-C transporter) [Source:UniProtKB/Swiss-Prot;Acc:Q99758]
PAK2	Post-Translational Modification	YJR126C	2.36412	ENSP00000374374	FOLH1B		Prostate-specific membrane antigen-like protein (Cell growth-inhibiting gene 26 protein) [Source:UniProtKB/Swiss-Prot;Acc:Q9HBA9]
PAK2	Post-Translational Modification	YHR161C	3.38045	ENSP00000377012	PICALM		Phosphatidylinositol-binding clathrin assembly protein (Clathrin assembly lymphoid myeloid leukemia protein) [Source:UniProtKB/Swiss-Prot;Acc:Q13492]
PAK2	Post-Translational Modification	YER056C-A	2.27844	ENSP00000378162	RPL34	Cancer	60S ribosomal protein L34 [Source:UniProtKB/Swiss-Prot;Acc:P49207]
PAK2	Post-Translational Modification	YJR134C	2.17007	ENSP00000381567	TMF1		TATA element modulatory factor (TMF) [Source:UniProtKB/Swiss-Prot;Acc:P82094]
PAK2	Post-Translational Modification	YJL141C	3.07913	ENSP00000381932	DYRK1A	Cell Morphology	Dual specificity tyrosine-phosphorylation-regulated kinase 1A (EC 2.7.12.1)(Protein kinase minibrain homolog)(MNBH)(hMNB)(HP86)(Dual specificity YAK1-related kinase) [Source:UniProtKB/Swiss-Prot;Acc:Q13627]
PIK3CB	Cell death and survival	YJR110W	2.77755	ENSP00000363985	MTMR8	Cell Death and Survival	Myotubularin-related protein 8 (EC 3.1.3.-) [Source:UniProtKB/Swiss-Prot;Acc:Q96EF0]
PRKCE	Cell death and survival	YER103W	2.0306	ENSP00000227378	HSPA8	Cell Death and Survival	Heat shock cognate 71 kDa protein (Heat shock 70 kDa protein 8). [Source:Uniprot/SWISSPROT;Acc:P11142]
PRKCE	Cell death and survival	YLR176C	2.51197	ENSP00000254325	RFX1		MHC class II regulatory factor RFX1 (RFX) (Enhancer factor C) (EF-C). [Source:Uniprot/SWISSPROT;Acc:P22670]
PRKCE	Cell death and survival	YJL106W	2.25724	ENSP00000263043	ICK	Post-Translational Modification	Serine/threonine-protein kinase ICK (EC 2.7.11.22)(Intestinal cell kinase)(hICK)(MAK-related kinase)(MRK)(Laryngeal cancer kinase 2)(LCK2) [Source:UniProtKB/Swiss-Prot;Acc:Q9UPZ9]
PRKCE	Cell death and survival	YDR204W	2.07589	ENSP00000300452	COQ4		Ubiquinone biosynthesis protein COQ4 homolog (Coenzyme Q biosynthesis protein 4 homolog). [Source:Uniprot/SWISSPROT;Acc:Q9Y3A0]
PRKCE	Cell death and survival	YML102W	2.31209	ENSP00000315700	CHAF1B	Cellular Assembly and Organization	Chromatin assembly factor 1 subunit B (CAF-1 subunit B) (Chromatin assembly factor I p60 subunit) (CAF-I 60 kDa subunit) (CAF-Ip60) (M- phase phosphoprotein 7). [Source:Uniprot/SWISSPROT;Acc:Q13112]
PRKCE	Cell death and survival	YPL240C	1.96223	ENSP00000325875	HSP90AB1	Cell Death and Survival	Heat shock protein HSP 90-beta (HSP 90)(HSP 84) [Source:UniProtKB/Swiss-Prot;Acc:P08238]
PRKCE	Cell death and survival	YDR020C	2.66334	ENSP00000356853	SDHC	Cell Death and Survival	succinate dehydrogenase complex, subunit C, integral membrane protein, 15kDa [Source:HGNC Symbol;Acc:10682]
PRKCE	Cell death and survival	YBR223C	2.44129	ENSP00000377099	TDP1	DNA Replication, Recombination, and Repair	Tyrosyl-DNA phosphodiesterase 1 (Tyr-DNA phosphodiesterase 1)(EC 3.1.4.-) [Source:UniProtKB/Swiss-Prot;Acc:Q9NUW8]
PRKCE	Cell death and survival	YDL201W	2.02953	ENSP00000386157	METTL1		tRNA (guanine-N(7)-)-methyltransferase (EC 2.1.1.33)(tRNA(m7G46)-methyltransferase)(Methyltransferase-like protein 1) [Source:UniProtKB/Swiss-Prot;Acc:Q9UBP6]
PRKCQ	Cell death and survival	YHL036W	3.52039	ENSP00000023064	SLC7A9	Small Molecule Biochemistry	B(0,+)-type amino acid transporter 1 (B(0,+)AT) (Glycoprotein- associated amino acid transporter b0,+AT1). [Source:Uniprot/SWISSPROT;Acc:P82251]
PRKCQ	Cell death and survival	YJR106W	4.09142	ENSP00000202831	SLC8B1	Molecular Transport	Sodium/potassium/calcium exchanger 6 Precursor (Na(+)/K(+)/Ca(2+)-exchange protein 6)(Solute carrier family 24 member 6) [Source:UniProtKB/Swiss-Prot;Acc:Q6J4K2]
PRKCQ	Cell death and survival	YPL196W	3.23841	ENSP00000217320	TLDC2		Uncharacterized protein C20orf118 [Source:UniProtKB/Swiss-Prot;Acc:A0PJX2]
PRKCQ	Cell death and survival	YPL170W	3.45622	ENSP00000217971	PGRMC1	Cell Death and Survival	Membrane associated progesterone receptor component 1 (mPR). [Source:Uniprot/SWISSPROT;Acc:O00264]
PRKCQ	Cell death and survival	YMR315W	3.56513	ENSP00000221403	DHDH	Carbohydrate Metabolism	dimeric dihydrodiol dehydrogenase [Source:RefSeq_peptide;Acc:NP_055290]
PRKCQ	Cell death and survival	YNL072W	2.70206	ENSP00000221486	RNASEH2A	Cell Death and Survival	Ribonuclease HI large subunit (EC 3.1.26.4) (RNase HI large subunit) (RNase H(35)) (Ribonuclease H2) (RNase H2). [Source:Uniprot/SWISSPROT;Acc:O75792]
PRKCQ	Cell death and survival	YMR242C	3.07755	ENSP00000222247	RPL18A		60S ribosomal protein L18a. [Source:Uniprot/SWISSPROT;Acc:Q02543]
PRKCQ	Cell death and survival	YDR059C	3.73115	ENSP00000222402	UBE2D4		ubiquitin-conjugating enzyme E2D 4 (putative) [Source:RefSeq_peptide;Acc:NP_057067]
PRKCQ	Cell death and survival	YER146W	3.52424	ENSP00000223084	LSM5		U6 snRNA-associated Sm-like protein LSm5. [Source:Uniprot/SWISSPROT;Acc:Q9Y4Y9]
PRKCQ	Cell death and survival	YML078W	3.42156	ENSP00000225174	PPIF	Cell Death and Survival	Peptidyl-prolyl cis-trans isomerase, mitochondrial precursor (EC 5.2.1.8) (PPIase) (Rotamase) (Cyclophilin F). [Source:Uniprot/SWISSPROT;Acc:P30405]
PRKCQ	Cell death and survival	YLR050C	2.78075	ENSP00000226230	TMEM97		Transmembrane protein 97 (Protein MAC30) [Source:UniProtKB/Swiss-Prot;Acc:Q5BJF2]
PRKCQ	Cell death and survival	YBL075C	3.3996	ENSP00000227378	HSPA8	Cell Death and Survival	Heat shock cognate 71 kDa protein (Heat shock 70 kDa protein 8). [Source:Uniprot/SWISSPROT;Acc:P11142]
PRKCQ	Cell death and survival	YLL024C	2.63519	ENSP00000227378	HSPA8	Cell Death and Survival	Heat shock cognate 71 kDa protein (Heat shock 70 kDa protein 8). [Source:Uniprot/SWISSPROT;Acc:P11142]
PRKCQ	Cell death and survival	YNL325C	2.64698	ENSP00000230124	FIG4	Small Molecule Biochemistry	SAC domain-containing protein 3. [Source:Uniprot/SWISSPROT;Acc:Q92562]
PRKCQ	Cell death and survival	YOR348C	2.61372	ENSP00000231706	SLC7A14		solute carrier family 7 (cationic amino acid transporter, y+ system), member 14 [Source:RefSeq_peptide;Acc:NP_066000]
PRKCQ	Cell death and survival	YBR069C	2.17041	ENSP00000231706	SLC7A14		solute carrier family 7 (cationic amino acid transporter, y+ system), member 14 [Source:RefSeq_peptide;Acc:NP_066000]
PRKCQ	Cell death and survival	YAL030W	2.3553	ENSP00000236192	VAMP4	Small Molecule Biochemistry	Vesicle-associated membrane protein 4 (VAMP-4). [Source:Uniprot/SWISSPROT;Acc:O75379]
PRKCQ	Cell death and survival	YBR161W	3.45254	ENSP00000236709	A4GNT		Alpha-1,4-N-acetylglucosaminyltransferase (Alpha4GnT)(EC 2.4.1.-) [Source:UniProtKB/Swiss-Prot;Acc:Q9UNA3]
PRKCQ	Cell death and survival	YLR028C	4.01676	ENSP00000236959	ATIC	Nucleic Acid Metabolism	Bifunctional purine biosynthesis protein PURH [Includes: Phosphoribosylaminoimidazolecarboxamide formyltransferase (EC 2.1.2.3) (AICAR transformylase); IMP cyclohydrolase (EC 3.5.4.10) (Inosinicase) (IMP synthetase) (ATIC)]. [Source:Uniprot/SWISSPROT;Acc:P31939]
PRKCQ	Cell death and survival	YBR046C	2.47022	ENSP00000238721	TP53I3	Nucleic Acid Metabolism	Putative quinone oxidoreductase (EC 1.-.-.-) (Tumor protein p53- inducible protein 3) (p53-induced protein 3). [Source:Uniprot/SWISSPROT;Acc:Q53FA7]
PRKCQ	Cell death and survival	YJR070C	2.99775	ENSP00000250937	DOHH		HEAT-like (PBS lyase) repeat containing 1 [Source:RefSeq_peptide;Acc:NP_112594]
PRKCQ	Cell death and survival	YER168C	2.6438	ENSP00000251607	TRNT1		tRNA-nucleotidyltransferase 1, mitochondrial Precursor (EC 2.7.7.25)(Mitochondrial tRNA nucleotidyl transferase, CCA-adding)(mt tRNA adenylyltransferase)(mt tRNA CCA-pyrophosphorylase)(mt tRNA CCA-diphosphorylase)(mt CCA-adding enzyme) [Source:UniProtKB/Swiss-Prot;Acc:Q96Q11]
PRKCQ	Cell death and survival	YHR163W	2.23526	ENSP00000252603	PGLS	Nucleic Acid Metabolism	6-phosphogluconolactonase (EC 3.1.1.31) (6PGL). [Source:Uniprot/SWISSPROT;Acc:O95336]
PRKCQ	Cell death and survival	YBR024W	2.99305	ENSP00000255390	SCO1		SCO1 protein homolog, mitochondrial precursor. [Source:Uniprot/SWISSPROT;Acc:O75880]
PRKCQ	Cell death and survival	YJL079C	2.66048	ENSP00000260113	PI15		Peptidase inhibitor 15 Precursor (Cysteine-rich secretory protein 8)(CRISP-8)(25 kDa trypsin inhibitor)(p25TI)(SugarCrisp) [Source:UniProtKB/Swiss-Prot;Acc:O43692]
PRKCQ	Cell death and survival	YLR019W	2.93582	ENSP00000260327	CTDSPL2		CTD small phosphatase-like protein 2 (CTDSP-like 2)(EC 3.1.3.-) [Source:UniProtKB/Swiss-Prot;Acc:Q05D32]
PRKCQ	Cell death and survival	YJL060W	3.10239	ENSP00000260508	CCBL2	Small Molecule Biochemistry	Kynurenine--oxoglutarate transaminase 3 (EC 2.6.1.7)(Kynurenine--oxoglutarate transaminase III)(Kynurenine aminotransferase III)(KATIII)(Cysteine-S-conjugate beta-lyase 2)(EC 4.4.1.13) [Source:UniProtKB/Swiss-Prot;Acc:Q6YP21]
PRKCQ	Cell death and survival	YHR123W	4.00053	ENSP00000260585	EPT1		Selenoprotein I. [Source:Uniprot/SWISSPROT;Acc:Q9C0D9]
PRKCQ	Cell death and survival	YLR201C	3.39929	ENSP00000262507	COQ9		Ubiquinone biosynthesis protein COQ9, mitochondrial Precursor [Source:UniProtKB/Swiss-Prot;Acc:O75208]
PRKCQ	Cell death and survival	YMR222C	4.18256	ENSP00000263084	OVCA2		Ovarian cancer-associated gene 2 protein [Source:UniProtKB/Swiss-Prot;Acc:Q8WZ82]
PRKCQ	Cell death and survival	YOR002W	3.43351	ENSP00000263440	ALG6	Post-Translational Modification	Dolichyl pyrophosphate Man9GlcNAc2 alpha-1,3-glucosyltransferase (EC 2.4.1.-) (Dolichyl-P-Glc:Man9GlcNAc2-PP-dolichyl glucosyltransferase). [Source:Uniprot/SWISSPROT;Acc:Q9Y672]
PRKCQ	Cell death and survival	YJL100W	3.44696	ENSP00000264864	PI4K2B	Cellular Assembly and Organization	phosphatidylinositol 4-kinase type-II beta [Source:RefSeq_peptide;Acc:NP_060793]
PRKCQ	Cell death and survival	YML001W	1.99911	ENSP00000265062	RAB7A	Molecular Transport	Ras-related protein Rab-7. [Source:Uniprot/SWISSPROT;Acc:P51149]
PRKCQ	Cell death and survival	YNL082W	2.26606	ENSP00000265849	PMS2	Cell Morphology	PMS1 protein homolog 2 (DNA mismatch repair protein PMS2). [Source:Uniprot/SWISSPROT;Acc:P54278]
PRKCQ	Cell death and survival	YBL078C	2.03905	ENSP00000266458	GABARAPL1	Cell Morphology	Gamma-aminobutyric acid receptor-associated protein-like 1 (GABA(A) receptor-associated protein-like 1) (Glandular epithelial cell protein 1) (GEC-1) (Early estrogen-regulated protein). [Source:Uniprot/SWISSPROT;Acc:Q9H0R8]
PRKCQ	Cell death and survival	YBR041W	3.33764	ENSP00000267842	SLC27A2	Small Molecule Biochemistry	Very-long-chain acyl-CoA synthetase (EC 6.2.1.-) (Very-long-chain- fatty-acid-CoA ligase). [Source:Uniprot/SWISSPROT;Acc:O14975]
PRKCQ	Cell death and survival	YDL135C	3.70278	ENSP00000269321	ARHGDIA	Cell Death and Survival	Rho GDP-dissociation inhibitor 1 (Rho GDI 1) (Rho-GDI alpha). [Source:Uniprot/SWISSPROT;Acc:P52565]
PRKCQ	Cell death and survival	YPL263C	3.6547	ENSP00000270583	KLHDC4		kelch domain containing 4 [Source:RefSeq_peptide;Acc:NP_060036]
PRKCQ	Cell death and survival	YBL102W	2.47232	ENSP00000271375	SFT2D2		Vesicle transport protein SFT2B (SFT2 domain-containing protein 2) [Source:UniProtKB/Swiss-Prot;Acc:O95562]
PRKCQ	Cell death and survival	YDR117C	2.66471	ENSP00000271764	EIF2D	Molecular Transport	Ligatin (Hepatocellular carcinoma-associated antigen 56). [Source:Uniprot/SWISSPROT;Acc:P41214]
PRKCQ	Cell death and survival	YOR271C	4.33142	ENSP00000272433	SFXN5		Sideroflexin-5. [Source:Uniprot/SWISSPROT;Acc:Q8TD22]
PRKCQ	Cell death and survival	YJL048C	2.60687	ENSP00000272638	UBXN4		UBX domain-containing protein 2. [Source:Uniprot/SWISSPROT;Acc:Q92575]
PRKCQ	Cell death and survival	YNL288W	2.25612	ENSP00000273064	RQCD1		RCD1 required for cell differentiation1 homolog [Source:RefSeq_peptide;Acc:NP_005435]
PRKCQ	Cell death and survival	YDR093W	2.20582	ENSP00000273859	ATP10D		Potential phospholipid-transporting ATPase VD (EC 3.6.3.1) (ATPVD). [Source:Uniprot/SWISSPROT;Acc:Q9P241]
PRKCQ	Cell death and survival	YBR235W	2.83635	ENSP00000275730	SLC12A9		solute carrier family 12 (potassium/chloride transporters), member 9 [Source:RefSeq_peptide;Acc:NP_064631]
PRKCQ	Cell death and survival	YCL033C	2.41425	ENSP00000277598	MSRB2		Methionine-R-sulfoxide reductase B2 (EC 1.8.4.-). [Source:Uniprot/SWISSPROT;Acc:Q9Y3D2]
PRKCQ	Cell death and survival	YAL062W	3.28356	ENSP00000277865	GLUD1	Cell Death and Survival	Glutamate dehydrogenase 1, mitochondrial precursor (EC 1.4.1.3) (GDH). [Source:Uniprot/SWISSPROT;Acc:P00367]
PRKCQ	Cell death and survival	YMR221C	2.5947	ENSP00000278426	SLC43A1	Molecular Transport	Large neutral amino acids transporter small subunit 3 (L-type amino acid transporter 3) (Solute carrier family 43 member 1) (Prostate cancer overexpressed gene 1 protein). [Source:Uniprot/SWISSPROT;Acc:O75387]
PRKCQ	Cell death and survival	YBR183W	3.89986	ENSP00000278544	ACER3	Small Molecule Biochemistry	Alkaline phytoceramidase (EC 3.5.1.-) (aPHC) (Alkaline ceramidase) (Alkaline dihydroceramidase SB89). [Source:Uniprot/SWISSPROT;Acc:Q9NUN7]
PRKCQ	Cell death and survival	YNL071W	2.67016	ENSP00000280346	DLAT	Nucleic Acid Metabolism	Dihydrolipoyllysine-residue acetyltransferase component of pyruvate dehydrogenase complex, mitochondrial precursor (EC 2.3.1.12) (Pyruvate dehydrogenase complex E2 subunit) (PDCE2) (E2) (Dihydrolipoamide S- acetyltransferase component of pyruvate dehydrog [Source:Uniprot/SWISSPROT;Acc:P10515]
PRKCQ	Cell death and survival	YML027W	3.9757	ENSP00000281321	POU4F2	Cell Morphology	POU domain, class 4, transcription factor 2 (Brain-specific homeobox/POU domain protein 3B)(Brn-3B) [Source:UniProtKB/Swiss-Prot;Acc:Q12837]
PRKCQ	Cell death and survival	YBR212W	3.49091	ENSP00000282574	TIA1	Cell Death and Survival	Nucleolysin TIA-1 isoform p40 (RNA-binding protein TIA-1) (p40-TIA-1) [Contains: Nucleolysin TIA-1 isoform p15 (p15-TIA-1)]. [Source:Uniprot/SWISSPROT;Acc:P31483]
PRKCQ	Cell death and survival	YBR245C	3.70285	ENSP00000283131	SMARCA5	DNA Replication, Recombination, and Repair	SWI/SNF related matrix associated actin dependent regulator of chromatin subfamily A member 5 (EC 3.6.1.-) (SWI/SNF-related matrix- associated actin-dependent regulator of chromatin A5) (Sucrose nonfermenting protein 2 homolog) (hSNF2H). [Source:Uniprot/SWISSPROT;Acc:O60264]
PRKCQ	Cell death and survival	YBR231C	2.06295	ENSP00000283882	CFDP1		craniofacial development protein 1 [Source:RefSeq_peptide;Acc:NP_006315]
PRKCQ	Cell death and survival	YLR207W	2.57953	ENSP00000284951	SEL1L2		OTTHUMP00000030307 (Fragment). [Source:Uniprot/SPTREMBL;Acc:Q5TEA6]
PRKCQ	Cell death and survival	YDR265W	3.42278	ENSP00000288774	PEX10	Molecular Transport	Peroxisome assembly protein 10 (Peroxin-10) (RING finger protein 69). [Source:Uniprot/SWISSPROT;Acc:O60683]
PRKCQ	Cell death and survival	YNL292W	3.51786	ENSP00000298746	TRUB1		TruB pseudouridine (psi) synthase homolog 1 [Source:RefSeq_peptide;Acc:NP_631908]
PRKCQ	Cell death and survival	YJL154C	2.21256	ENSP00000299138	VPS35		Vacuolar protein sorting 35 (Vesicle protein sorting 35) (hVPS35) (Maternal-embryonic 3). [Source:Uniprot/SWISSPROT;Acc:Q96QK1]
PRKCQ	Cell death and survival	YDL174C	2.90449	ENSP00000300051	LDHD		D-lactate dehydrogenase isoform 1 precursor [Source:RefSeq_peptide;Acc:NP_705690]
PRKCQ	Cell death and survival	YDL022W	3.18661	ENSP00000301149	GPD1	Nucleic Acid Metabolism	Glycerol-3-phosphate dehydrogenase [NAD+], cytoplasmic (EC 1.1.1.8) (GPD-C) (GPDH-C). [Source:Uniprot/SWISSPROT;Acc:P21695]
PRKCQ	Cell death and survival	YCL001W	2.77008	ENSP00000302088	RER1	Cellular Assembly and Organization	Protein RER1 [Source:UniProtKB/Swiss-Prot;Acc:O15258]
PRKCQ	Cell death and survival	YDR084C	2.60064	ENSP00000305654	TVP23B		Protein FAM18B. [Source:Uniprot/SWISSPROT;Acc:Q9NYZ1]
PRKCQ	Cell death and survival	YMR121C	3.37288	ENSP00000309334	RPL15		60S ribosomal protein L15 [Source:UniProtKB/Swiss-Prot;Acc:P61313]
PRKCQ	Cell death and survival	YOR226C	2.93186	ENSP00000310623	ISCU	Amino Acid Metabolism	NifU-like N-terminal domain containing protein, mitochondrial precursor (NifU-like protein) (Iron-sulfur cluster assembly enzyme ISCU). [Source:Uniprot/SWISSPROT;Acc:Q9H1K1]
PRKCQ	Cell death and survival	YOR126C	2.82371	ENSP00000314400	IAH1		Isoamyl acetate-hydrolyzing esterase 1 homolog [Source:Uniprot/SWISSPROT;Acc:H7BXP8]
PRKCQ	Cell death and survival	YDR284C	3.99653	ENSP00000314854	PLPP5		HTPAP protein [Source:RefSeq_peptide;Acc:NP_115872]
PRKCQ	Cell death and survival	YHR073W	2.74015	ENSP00000315410	OSBPL3	Cancer	Oxysterol binding protein-related protein 3 (OSBP-related protein 3) (ORP-3). [Source:Uniprot/SWISSPROT;Acc:Q9H4L5]
PRKCQ	Cell death and survival	YLR114C	2.55912	ENSP00000315568	AVL9		Uncharacterized protein KIAA0241 [Source:UniProtKB/Swiss-Prot;Acc:Q8NBF6]
PRKCQ	Cell death and survival	YDR092W	2.83782	ENSP00000316176	UBE2N	Protein Synthesis	Ubiquitin-conjugating enzyme E2 N (EC 6.3.2.19) (Ubiquitin-protein ligase N) (Ubiquitin carrier protein N) (Ubc13) (Bendless-like ubiquitin conjugating enzyme). [Source:Uniprot/SWISSPROT;Acc:P61088]
PRKCQ	Cell death and survival	YNL259C	2.39743	ENSP00000316854	ATOX1	Molecular Transport	Copper transport protein ATOX1 (Metal transport protein ATX1) [Source:UniProtKB/Swiss-Prot;Acc:O00244]
PRKCQ	Cell death and survival	YLR118C	3.28721	ENSP00000320043	LYPLA1		Acyl-protein thioesterase 1 (EC 3.1.2.-) (Lysophospholipase I). [Source:Uniprot/SWISSPROT;Acc:O75608]
PRKCQ	Cell death and survival	YMR012W	3.13491	ENSP00000320468	CLUH		Putative eukaryotic translation initiation factor 3 subunit (eIF-3) [Source:UniProtKB/Swiss-Prot;Acc:O75153]
PRKCQ	Cell death and survival	YOR274W	2.82731	ENSP00000321810	TRIT1		tRNA isopentenyltransferase, mitochondrial precursor (EC 2.5.1.8) (Isopentenyl-diphosphate:tRNA isopentenyltransferase) (IPP transferase) (IPTase) (IPPT) (hGRO1). [Source:Uniprot/SWISSPROT;Acc:Q9H3H1]
PRKCQ	Cell death and survival	YCL037C	2.50485	ENSP00000321997	LARP1B	Cell Death and Survival	La ribonucleoprotein domain family member 2 isoform 1 [Source:RefSeq_peptide;Acc:NP_060548]
PRKCQ	Cell death and survival	YOR125C	2.35604	ENSP00000322316	COQ7	Molecular Transport	Ubiquinone biosynthesis protein COQ7 homolog (Coenzyme Q biosynthesis protein 7 homolog) (Timing protein clk-1 homolog). [Source:Uniprot/SWISSPROT;Acc:Q99807]
PRKCQ	Cell death and survival	YPL085W	2.00684	ENSP00000325827	SEC16A	Cellular Assembly and Organization
PRKCQ	Cell death and survival	YMR035W	3.67641	ENSP00000329553	IMMP2L		IMP2 inner mitochondrial membrane protease-like [Source:RefSeq_peptide;Acc:NP_115938]
PRKCQ	Cell death and survival	YHL010C	2.15101	ENSP00000330813	BRAP		BRCA1-associated protein (EC 6.3.2.-) (BRAP2) (Impedes mitogenic signal propagation) (IMP) (RING finger protein 52). [Source:Uniprot/SWISSPROT;Acc:Q7Z569]
PRKCQ	Cell death and survival	YBL036C	3.88725	ENSP00000333551	PROSC		Proline synthetase co-transcribed bacterial homolog protein. [Source:Uniprot/SWISSPROT;Acc:O94903]
PRKCQ	Cell death and survival	YIL160C	2.33005	ENSP00000333664	ACAA1	Lipid Metabolism	3-ketoacyl-CoA thiolase, peroxisomal precursor (EC 2.3.1.16) (Beta- ketothiolase) (Acetyl-CoA acyltransferase) (Peroxisomal 3-oxoacyl-CoA thiolase). [Source:Uniprot/SWISSPROT;Acc:P09110]
PRKCQ	Cell death and survival	YHL021C	4.0858	ENSP00000335261	TMLHE	Small Molecule Biochemistry	Trimethyllysine dioxygenase, mitochondrial precursor (EC 1.14.11.8) (Epsilon-trimethyllysine 2-oxoglutarate dioxygenase) (TML-alpha- ketoglutarate dioxygenase) (TML hydroxylase) (TML dioxygenase) (TMLD). [Source:Uniprot/SWISSPROT;Acc:Q9NVH6]
PRKCQ	Cell death and survival	YDR148C	2.55408	ENSP00000335304	DLST	Cell Death and Survival	Dihydrolipoyllysine-residue succinyltransferase component of 2- oxoglutarate dehydrogenase complex, mitochondrial precursor (EC 2.3.1.61) (Dihydrolipoamide succinyltransferase component of 2- oxoglutarate dehydrogenase complex) (E2) (E2K). [Source:Uniprot/SWISSPROT;Acc:P36957]
PRKCQ	Cell death and survival	YBL056W	2.34665	ENSP00000342778	PPM1G	Cell Death and Survival	Protein phosphatase 2C gamma isoform (EC 3.1.3.16) (PP2C-gamma) (Protein phosphatase magnesium-dependent 1 gamma) (Protein phosphatase 1C). [Source:Uniprot/SWISSPROT;Acc:O15355]
PRKCQ	Cell death and survival	YHR143W	2.19928	ENSP00000342889	POLR2K		DNA-directed RNA polymerases I, II, and III 7.0 kDa polypeptide (EC 2.7.7.6) (ABC10-alpha) (RPB7.0) (RPB10alpha) (RPABC4). [Source:Uniprot/SWISSPROT;Acc:P53803]
PRKCQ	Cell death and survival	YPL127C	3.60119	ENSP00000344504	H1F0		Histone H1.0 (H1(0)) (Histone H1'). [Source:Uniprot/SWISSPROT;Acc:P07305]
PRKCQ	Cell death and survival	YBR244W	2.16733	ENSP00000346103	GPX4	Cell Death and Survival	Phospholipid hydroperoxide glutathione peroxidase, mitochondrial precursor (EC 1.11.1.12) (PHGPx) (GPX-4). [Source:Uniprot/SWISSPROT;Acc:P36969]
PRKCQ	Cell death and survival	YOR005C	3.11067	ENSP00000349393	LIG4	Cell Death and Survival	DNA ligase IV (EC 6.5.1.1) (Polydeoxyribonucleotide synthase [ATP]). [Source:Uniprot/SWISSPROT;Acc:P49917]
PRKCQ	Cell death and survival	YER078C	4.06379	ENSP00000349658	XPNPEP3		Probable Xaa-Pro aminopeptidase 3 (X-Pro aminopeptidase 3)(EC 3.4.11.9)(Aminopeptidase P3)(APP3) [Source:UniProtKB/Swiss-Prot;Acc:Q9NQH7]
PRKCQ	Cell death and survival	YDL100C	3.16235	ENSP00000349887	ASNA1	Molecular Transport	Arsenical pump-driving ATPase (EC 3.6.3.16)(Arsenite-translocating ATPase)(Arsenical resistance ATPase)(Arsenite-transporting ATPase) [Source:UniProtKB/Swiss-Prot;Acc:O43681]
PRKCQ	Cell death and survival	YAL042W	3.60405	ENSP00000349970	ERGIC3		Serologically defined breast cancer antigen NY-BR-84. [Source:Uniprot/SWISSPROT;Acc:Q9Y282]
PRKCQ	Cell death and survival	YNL183C	3.2028	ENSP00000350896	EPHB4	Cell Death and Survival	Ephrin type-B receptor 4 Precursor (EC 2.7.10.1)(Tyrosine-protein kinase receptor HTK)(Tyrosine-protein kinase TYRO11) [Source:UniProtKB/Swiss-Prot;Acc:P54760]
PRKCQ	Cell death and survival	YBR104W	2.48124	ENSP00000352167	SLC25A29	Molecular Transport	Mitchondrial carnitine/acylcarnitine carrier protein CACL (CACT-like). [Source:Uniprot/SWISSPROT;Acc:Q8N8R3]
PRKCQ	Cell death and survival	YPL119C	3.97698	ENSP00000353284	DDX3Y		DEAD-box protein 3, Y-chromosomal. [Source:Uniprot/SWISSPROT;Acc:O15523]
PRKCQ	Cell death and survival	YOL006C	3.34187	ENSP00000354522	TOP1	Cell Death and Survival	DNA topoisomerase I (EC 5.99.1.2). [Source:Uniprot/SWISSPROT;Acc:P11387]
PRKCQ	Cell death and survival	YDL137W	2.306	ENSP00000355714	ABCB10	Small Molecule Biochemistry	ADP-ribosylation factor 1 [Source:UniProtKB/Swiss-Prot;Acc:P84077]
PRKCQ	Cell death and survival	YML087C	2.10404	ENSP00000356218	CYB5R1		NADH-cytochrome b5 reductase 1 (b5R.1)(EC 1.6.2.2)(NAD(P)H:quinone oxidoreductase type 3 polypeptide A2)(Humb5R2) [Source:UniProtKB/Swiss-Prot;Acc:Q9UHQ9]
PRKCQ	Cell death and survival	YDR329C	3.30214	ENSP00000356563	PEX3	Cellular Assembly and Organization	peroxisomal biogenesis factor 3 [Source:HGNC Symbol;Acc:8858]
PRKCQ	Cell death and survival	YIL064W	2.46366	ENSP00000357830	METTL10		Methyltransferase-like protein 10 (EC 2.1.1.-) [Source:UniProtKB/Swiss-Prot;Acc:Q5JPI9]
PRKCQ	Cell death and survival	YHR200W	3.62714	ENSP00000357876	PSMD4		26S proteasome non-ATPase regulatory subunit 4 (26S proteasome regulatory subunit S5A)(Rpn10)(Multiubiquitin chain-binding protein)(Antisecretory factor 1)(ASF)(AF) [Source:UniProtKB/Swiss-Prot;Acc:P55036]
PRKCQ	Cell death and survival	YNL065W	2.69516	ENSP00000358515	SLC22A15		solute carrier family 22, member 15 [Source:HGNC Symbol;Acc:20301]
PRKCQ	Cell death and survival	YIL120W	2.3753	ENSP00000358515	SLC22A15		solute carrier family 22, member 15 [Source:HGNC Symbol;Acc:20301]
PRKCQ	Cell death and survival	YPL249C	2.89855	ENSP00000359356	EVI5		Ecotropic viral integration site 5 protein homolog (EVI-5)(Neuroblastoma stage 4S gene protein) [Source:UniProtKB/Swiss-Prot;Acc:O60447]
PRKCQ	Cell death and survival	YNL136W	3.47602	ENSP00000359518	MRGBP		MRG-binding protein [Source:UniProtKB/Swiss-Prot;Acc:Q9NV56]
PRKCQ	Cell death and survival	YAR035W	3.98215	ENSP00000360541	CPT2	Small Molecule Biochemistry	Carnitine O-palmitoyltransferase 2, mitochondrial Precursor (Carnitine palmitoyltransferase II)(CPT II)(EC 2.3.1.21) [Source:UniProtKB/Swiss-Prot;Acc:P23786]
PRKCQ	Cell death and survival	YLR180W	4.04667	ENSP00000361287	MAT1A	Small Molecule Biochemistry	S-adenosylmethionine synthetase isoform type-1 (AdoMet synthetase 1)(EC 2.5.1.6)(Methionine adenosyltransferase 1)(Methionine adenosyltransferase I/III)(MAT-I/III) [Source:UniProtKB/Swiss-Prot;Acc:Q00266]
PRKCQ	Cell death and survival	YIL069C	2.07424	ENSP00000361435	RPS24	Cancer	40S ribosomal protein S24 [Source:UniProtKB/Swiss-Prot;Acc:P62847]
PRKCQ	Cell death and survival	YBR261C	2.72773	ENSP00000361564	NTMT1		Methyltransferase-like protein 11A (EC 2.1.1.-) [Source:UniProtKB/Swiss-Prot;Acc:Q9BV86]
PRKCQ	Cell death and survival	YJR117W	2.16909	ENSP00000361845	ZMPSTE24	Protein Synthesis	CAAX prenyl protease 1 homolog (EC 3.4.24.84)(Prenyl protein-specific endoprotease 1)(Farnesylated proteins-converting enzyme 1)(FACE-1)(Zinc metalloproteinase Ste24 homolog) [Source:UniProtKB/Swiss-Prot;Acc:O75844]
PRKCQ	Cell death and survival	YPL013C	3.19717	ENSP00000362036	MRPS16		mitochondrial ribosomal protein S16 [Source:HGNC Symbol;Acc:14048]
PRKCQ	Cell death and survival	YPL217C	3.39348	ENSP00000363642	BMS1		Ribosome biogenesis protein BMS1 homolog (Ribosome assembly protein BMS1 homolog) [Source:UniProtKB/Swiss-Prot;Acc:Q14692]
PRKCQ	Cell death and survival	YBR010W	1.97076	ENSP00000364327	H3F3A	Cancer	Histone H3.3 [Source:UniProtKB/Swiss-Prot;Acc:P84243]
PRKCQ	Cell death and survival	YCL045C	2.81973	ENSP00000364354	EMC1		Uncharacterized protein KIAA0090 Precursor [Source:UniProtKB/Swiss-Prot;Acc:Q8N766]
PRKCQ	Cell death and survival	YEL042W	2.33234	ENSP00000365840	ENTPD6	DNA Replication, Recombination, and Repair	Ectonucleoside triphosphate diphosphohydrolase 6 (NTPDase 6)(EC 3.6.1.6)(CD39 antigen-like 2) [Source:UniProtKB/Swiss-Prot;Acc:O75354]
PRKCQ	Cell death and survival	YPL065W	4.08907	ENSP00000366565	VPS28	Cell Death and Survival	Vacuolar protein sorting-associated protein 28 homolog (H-Vps28) [Source:UniProtKB/Swiss-Prot;Acc:Q9UK41]
PRKCQ	Cell death and survival	YDL219W	3.02006	ENSP00000366672	DTD1		D-tyrosyl-tRNA(Tyr) deacylase 1 (EC 3.1.-.-)(Histidyl-tRNA synthetase-related) [Source:UniProtKB/Swiss-Prot;Acc:Q8TEA8]
PRKCQ	Cell death and survival	YBR018C	1.99067	ENSP00000368119	GALT	Small Molecule Biochemistry	Galactose-1-phosphate uridylyltransferase (Gal-1-P uridylyltransferase)(EC 2.7.7.12)(UDP-glucose--hexose-1-phosphate uridylyltransferase) [Source:UniProtKB/Swiss-Prot;Acc:P07902]
PRKCQ	Cell death and survival	YOL080C	3.3698	ENSP00000368533	AEN	Cell Death and Survival	Apoptosis-enhancing nuclease (EC 3.1.-.-)(Interferon-stimulated 20 kDa exonuclease-like 1) [Source:UniProtKB/Swiss-Prot;Acc:Q8WTP8]
PRKCQ	Cell death and survival	YIR002C	2.38212	ENSP00000369213	DDX58	Cell Death and Survival	Probable ATP-dependent RNA helicase DDX58 (EC 3.6.1.-)(DEAD-box protein 58)(Retinoic acid-inducible gene 1 protein)(RIG-1)(RIG-I) [Source:UniProtKB/Swiss-Prot;Acc:O95786]
PRKCQ	Cell death and survival	YIL013C	3.70976	ENSP00000371818	ABCA3	Cell Death and Survival	ATP-binding cassette sub-family A member 3 (ATP-binding cassette transporter 3)(ATP-binding cassette 3)(ABC-C transporter) [Source:UniProtKB/Swiss-Prot;Acc:Q99758]
PRKCQ	Cell death and survival	YOR011W	2.834	ENSP00000371818	ABCA3	Cell Death and Survival	ATP-binding cassette sub-family A member 3 (ATP-binding cassette transporter 3)(ATP-binding cassette 3)(ABC-C transporter) [Source:UniProtKB/Swiss-Prot;Acc:Q99758]
PRKCQ	Cell death and survival	YPL015C	2.50491	ENSP00000372191	SIRT3	Cell Death and Survival	NAD-dependent deacetylase sirtuin-3, mitochondrial Precursor (EC 3.5.1.-)(SIR2-like protein 3)(hSIRT3) [Source:UniProtKB/Swiss-Prot;Acc:Q9NTG7]
PRKCQ	Cell death and survival	YMR114C	3.07024	ENSP00000372955	HMCES		UPF0361 protein DC12 [Source:UniProtKB/Swiss-Prot;Acc:Q96FZ2]
PRKCQ	Cell death and survival	YLR038C	1.98719	ENSP00000376037	COX6B1		Cytochrome c oxidase subunit VIb isoform 1 (COX VIb-1) [Source:UniProtKB/Swiss-Prot;Acc:P14854]
PRKCQ	Cell death and survival	YML057W	4.16962	ENSP00000378323	PPP3CA		Serine/threonine-protein phosphatase 2B catalytic subunit alpha isoform (EC 3.1.3.16)(Calmodulin-dependent calcineurin A subunit alpha isoform)(CAM-PRP catalytic subunit) [Source:UniProtKB/Swiss-Prot;Acc:Q08209]
PRKCQ	Cell death and survival	YER123W	2.05449	ENSP00000378807	CSNK1G3		Casein kinase I isoform gamma-3 (CKI-gamma 3)(EC 2.7.11.1) [Source:UniProtKB/Swiss-Prot;Acc:Q9Y6M4]
PRKCQ	Cell death and survival	YOL011W	2.08275	ENSP00000380442	PLA2G4F		Cytosolic phospholipase A2 zeta (cPLA2-zeta)(EC 3.1.1.4)(Phospholipase A2 group IVF) [Source:UniProtKB/Swiss-Prot;Acc:Q68DD2]
PRKCQ	Cell death and survival	YOR040W	3.68276	ENSP00000380514	HAGH	Molecular Transport	Hydroxyacylglutathione hydrolase (EC 3.1.2.6)(Glyoxalase II)(Glx II) [Source:UniProtKB/Swiss-Prot;Acc:Q16775]
PRKCQ	Cell death and survival	YHR106W	2.24118	ENSP00000382120	AIFM3	Cell Death and Survival	Apoptosis-inducing factor 3 (EC 1.-.-.-)(Apoptosis-inducing factor-like protein) [Source:UniProtKB/Swiss-Prot;Acc:Q96NN9]
PRKCQ	Cell death and survival	YIL159W	2.7141	ENSP00000383178	DIAPH3	Protein Synthesis	Protein diaphanous homolog 3 (Diaphanous-related formin-3)(DRF3) [Source:UniProtKB/Swiss-Prot;Acc:Q9NSV4]
PRKCQ	Cell death and survival	YER007W	3.31512	ENSP00000384571	TBCE	Cell Signaling	Tubulin-specific chaperone E (Tubulin-folding cofactor E) [Source:UniProtKB/Swiss-Prot;Acc:Q15813]
SH3BP5L		YER141W	2.31776	ENSP00000016171	COX13		Cytochrome c oxidase assembly protein COX15 homolog. [Source:Uniprot/SWISSPROT;Acc:Q7KZN9]
SH3BP5L		YOR079C	2.10552	ENSP00000031146	SLC39A9		solute carrier family 39 (zinc transporter), member 9 [Source:RefSeq_peptide;Acc:NP_060845]
SH3BP5L		YJR148W	1.97946	ENSP00000261192	BCAT1	Small Molecule Biochemistry	Branched-chain-amino-acid aminotransferase, cytosolic (EC 2.6.1.42) (BCAT(c)) (ECA39 protein). [Source:Uniprot/SWISSPROT;Acc:P54687]
SH3BP5L		YPL006W	2.83491	ENSP00000269228	NPC1	Cell Death and Survival	Niemann-Pick C1 protein precursor. [Source:Uniprot/SWISSPROT;Acc:O15118]
SH3BP5L		YOR140W	2.12934	ENSP00000303599	HSFY1/HSFY2		Heat shock transcription factor, Y-linked (Heat shock transcription factor 2-like protein)(HSF2-like) [Source:UniProtKB/Swiss-Prot;Acc:Q96LI6]
SH3BP5L		YOR140W	2.12934	ENSP00000306549	HSFY1/HSFY2		Heat shock transcription factor, Y-linked (Heat shock transcription factor 2-like protein)(HSF2-like) [Source:UniProtKB/Swiss-Prot;Acc:Q96LI6]
SH3BP5L		YJL082W	1.97476	ENSP00000306598	TTC39C		Tetratricopeptide repeat protein 39C (TPR repeat protein 39C) [Source:UniProtKB/Swiss-Prot;Acc:Q8N584]
SH3BP5L		YBL022C	2.03684	ENSP00000353826	LONP1	Cell Death and Survival	Lon protease homolog, mitochondrial precursor (EC 3.4.21.-) (Lon protease-like protein) (LONP) (LONHs). [Source:Uniprot/SWISSPROT;Acc:P36776]
SH3BP5L		YJL082W	1.97476	ENSP00000360815	TTC39A		Tetratricopeptide repeat protein 39A (TPR repeat protein 39A)(Differentially expressed in MCF7 with estradiol protein 6)(DEME-6) [Source:UniProtKB/Swiss-Prot;Acc:Q5SRH9]
SH3BP5L		YOR070C	2.05588	ENSP00000365962	TBC1D25		TBC1 domain family member 25 [Source:UniProtKB/Swiss-Prot;Acc:Q3MII6]
SH3BP5L		YJR069C	2.15615	ENSP00000369456	ITPA	DNA Replication, Recombination, and Repair	Inosine triphosphate pyrophosphatase (ITPase)(Inosine triphosphatase)(EC 3.6.1.19)(Putative oncogene protein hlc14-06-p) [Source:UniProtKB/Swiss-Prot;Acc:Q9BY32]
SH3BP5L		YNL168C	2.51354	ENSP00000372112	FAHD1		Fumarylacetoacetate hydrolase domain-containing protein 1 (EC 3.-.-.-)(YISK-like) [Source:UniProtKB/Swiss-Prot;Acc:Q6P587]
SH3BP5L		YHR050W	2.49049	ENSP00000378364	SLC11A2	Cell Death and Survival	Natural resistance-associated macrophage protein 2 (NRAMP 2)(Divalent metal transporter 1)(DMT1) [Source:UniProtKB/Swiss-Prot;Acc:P49281]
SRC	Cell death and survival	YJL198W	4.4499	ENSP00000194130	SLC13A1		Solute carrier family 13 member 1 (Renal sodium/sulfate cotransporter) (Na(+)/sulfate cotransporter) (hNaSi-1). [Source:Uniprot/SWISSPROT;Acc:Q9BZW2]
SRC	Cell death and survival	YMR004W	4.09169	ENSP00000222990	SNX8	Molecular Transport	Sorting nexin-8. [Source:Uniprot/SWISSPROT;Acc:Q9Y5X2]
SRC	Cell death and survival	YMR292W	2.55362	ENSP00000229314	GOLT1B		UPF0198 protein CGI-141. [Source:Uniprot/SWISSPROT;Acc:Q9Y3E0]
SRC	Cell death and survival	YOR357C	4.0472	ENSP00000230085	SNX3	Cellular Assembly and Organization	Sorting nexin-3 (Protein SDP3) [Source:UniProtKB/Swiss-Prot;Acc:O60493]
SRC	Cell death and survival	YOL020W	2.70126	ENSP00000231706	SLC7A14		solute carrier family 7 (cationic amino acid transporter, y+ system), member 14 [Source:RefSeq_peptide;Acc:NP_066000]
SRC	Cell death and survival	YLL061W	2.08837	ENSP00000231706	SLC7A14		solute carrier family 7 (cationic amino acid transporter, y+ system), member 14 [Source:RefSeq_peptide;Acc:NP_066000]
SRC	Cell death and survival	YIL001W	3.35878	ENSP00000232744	ABTB1		ankyrin repeat and BTB (POZ) domain containing 1 isoform 2 [Source:RefSeq_peptide;Acc:NP_742024]
SRC	Cell death and survival	YNL063W	2.21487	ENSP00000232854	HEMK1		HemK methyltransferase family member 1 (EC 2.1.1.-) (M.HsaHemKP). [Source:Uniprot/SWISSPROT;Acc:Q9Y5R4]
SRC	Cell death and survival	YDR097C	2.6487	ENSP00000234420	MSH6	DNA Replication, Recombination, and Repair	DNA mismatch repair protein MSH6 (MutS-alpha 160 kDa subunit) (G/T mismatch binding protein) (GTBP) (GTMBP) (p160). [Source:Uniprot/SWISSPROT;Acc:P52701]
SRC	Cell death and survival	YBR046C	2.26778	ENSP00000238721	TP53I3	Nucleic Acid Metabolism	Putative quinone oxidoreductase (EC 1.-.-.-) (Tumor protein p53- inducible protein 3) (p53-induced protein 3). [Source:Uniprot/SWISSPROT;Acc:Q53FA7]
SRC	Cell death and survival	YLR097C	3.51548	ENSP00000244426	FBXO9	Cell Death and Survival	F-box only protein 9 (Cross-immune reaction antigen 1)(Renal carcinoma antigen NY-REN-57) [Source:UniProtKB/Swiss-Prot;Acc:Q9UK97]
SRC	Cell death and survival	YIL173W	2.48619	ENSP00000256637	SORT1	Cell Death and Survival	Sortilin precursor (Glycoprotein 95) (Gp95) (Neurotensin receptor 3) (NT3) (100 kDa NT receptor). [Source:Uniprot/SWISSPROT;Acc:Q99523]
SRC	Cell death and survival	YJL060W	2.59945	ENSP00000260508	CCBL2	Small Molecule Biochemistry	Kynurenine--oxoglutarate transaminase 3 (EC 2.6.1.7)(Kynurenine--oxoglutarate transaminase III)(Kynurenine aminotransferase III)(KATIII)(Cysteine-S-conjugate beta-lyase 2)(EC 4.4.1.13) [Source:UniProtKB/Swiss-Prot;Acc:Q6YP21]
SRC	Cell death and survival	YNL130C	4.54255	ENSP00000260585	EPT1		Selenoprotein I. [Source:Uniprot/SWISSPROT;Acc:Q9C0D9]
SRC	Cell death and survival	YDL066W	2.20757	ENSP00000260985	IDH1	Nucleic Acid Metabolism	Isocitrate dehydrogenase [NADP] cytoplasmic (EC 1.1.1.42) (Oxalosuccinate decarboxylase) (IDH) (NADP(+)-specific ICDH) (IDP). [Source:Uniprot/SWISSPROT;Acc:O75874]
SRC	Cell death and survival	YOR289W	1.97761	ENSP00000262844	AMMECR1		AMME syndrome candidate gene 1 protein. [Source:Uniprot/SWISSPROT;Acc:Q9Y4X0]
SRC	Cell death and survival	YDL156W	2.33377	ENSP00000263795	WDR76		WD repeat domain 76 [Source:RefSeq_peptide;Acc:NP_079184]
SRC	Cell death and survival	YBR001C	2.74666	ENSP00000264029	TREH	Small Molecule Biochemistry	Trehalase precursor (EC 3.2.1.28) (Alpha,alpha-trehalase) (Alpha,alpha-trehalose glucohydrolase). [Source:Uniprot/SWISSPROT;Acc:O43280]
SRC	Cell death and survival	YPR004C	2.07546	ENSP00000267950	EIFA		Electron transfer flavoprotein alpha-subunit, mitochondrial precursor (Alpha-ETF). [Source:Uniprot/SWISSPROT;Acc:P13804]
SRC	Cell death and survival	YPL006W	2.07473	ENSP00000269228	NPC1	Cell Death and Survival	Niemann-Pick C1 protein precursor. [Source:Uniprot/SWISSPROT;Acc:O15118]
SRC	Cell death and survival	YDR162C	3.19103	ENSP00000269886	SH3GL1	Cancer	Endophilin-A2 (Endophilin-2)(SH3 domain-containing GRB2-like protein 1)(SH3 domain protein 2B)(Extra eleven-nineteen leukemia fusion gene protein)(EEN)(EEN fusion partner of MLL) [Source:UniProtKB/Swiss-Prot;Acc:Q99961]
SRC	Cell death and survival	YHR181W	3.38748	ENSP00000272438	SFXN5		testis expressed sequence 261 [Source:RefSeq_peptide;Acc:NP_653183]
SRC	Cell death and survival	YMR221C	1.98056	ENSP00000278426	SLC43A1	Molecular Transport	Large neutral amino acids transporter small subunit 3 (L-type amino acid transporter 3) (Solute carrier family 43 member 1) (Prostate cancer overexpressed gene 1 protein). [Source:Uniprot/SWISSPROT;Acc:O75387]
SRC	Cell death and survival	YOL032W	2.27621	ENSP00000278483	C11orf73	Cellular Assembly and Organization	Uncharacterized protein C11orf73 [Source:UniProtKB/Swiss-Prot;Acc:Q53FT3]
SRC	Cell death and survival	YPL087W	3.1025	ENSP00000278544	ACER3	Small Molecule Biochemistry	Alkaline phytoceramidase (EC 3.5.1.-) (aPHC) (Alkaline ceramidase) (Alkaline dihydroceramidase SB89). [Source:Uniprot/SWISSPROT;Acc:Q9NUN7]
SRC	Cell death and survival	YNL071W	3.08521	ENSP00000280346	DLAT	Nucleic Acid Metabolism	Dihydrolipoyllysine-residue acetyltransferase component of pyruvate dehydrogenase complex, mitochondrial precursor (EC 2.3.1.12) (Pyruvate dehydrogenase complex E2 subunit) (PDCE2) (E2) (Dihydrolipoamide S- acetyltransferase component of pyruvate dehydrog [Source:Uniprot/SWISSPROT;Acc:P10515]
SRC	Cell death and survival	YPL089C	2.31634	ENSP00000284368	MEF2A		Myocyte-specific enhancer factor 2A (Serum response factor-like protein 1) [Source:UniProtKB/Swiss-Prot;Acc:Q02078]
SRC	Cell death and survival	YLR191W	2.63256	ENSP00000295030	PEX13	Small Molecule Biochemistry	Peroxisomal membrane protein PEX13 (Peroxin-13). [Source:Uniprot/SWISSPROT;Acc:Q92968]
SRC	Cell death and survival	YOL071W	2.05544	ENSP00000301761	SDHAF2	Cancer	Protein EMI5 homolog, mitochondrial Precursor [Source:UniProtKB/Swiss-Prot;Acc:Q9NX18]
SRC	Cell death and survival	YLR193C	2.35693	ENSP00000302114	PRELID1	Cell Death and Survival	Px19-like protein (25 kDa protein of relevant evolutionary and lymphoid interest) (PRELI). [Source:Uniprot/SWISSPROT;Acc:Q9Y255]
SRC	Cell death and survival	YLR216C	2.70994	ENSP00000303754	PPID	Cell Death and Survival	40 kDa peptidyl-prolyl cis-trans isomerase (EC 5.2.1.8) (PPIase) (Rotamase) (Cyclophilin-40) (CYP-40) (Cyclophilin-related protein). [Source:Uniprot/SWISSPROT;Acc:Q08752]
SRC	Cell death and survival	YDL125C	2.66891	ENSP00000304229	HINT1	Cell Death and Survival	Histidine triad nucleotide-binding protein 1 (Adenosine 5'- monophosphoramidase) (Protein kinase C inhibitor 1) (Protein kinase C- interacting protein 1) (PKCI-1). [Source:Uniprot/SWISSPROT;Acc:P49773]
SRC	Cell death and survival	YCL057W	2.72477	ENSP00000304467	THOP1	Protein Synthesis	Thimet oligopeptidase (EC 3.4.24.15) (Endopeptidase 24.15) (MP78). [Source:Uniprot/SWISSPROT;Acc:P52888]
SRC	Cell death and survival	YOR133W	2.12866	ENSP00000307940	EEF2		Elongation factor 2 (EF-2). [Source:Uniprot/SWISSPROT;Acc:P13639]
SRC	Cell death and survival	YPL162C	2.71965	ENSP00000310180	TMEM110		Transmembrane protein 110 [Source:UniProtKB/Swiss-Prot;Acc:Q86TL2]
SRC	Cell death and survival	YOR226C	2.63423	ENSP00000310623	ISCU	Amino Acid Metabolism	NifU-like N-terminal domain containing protein, mitochondrial precursor (NifU-like protein) (Iron-sulfur cluster assembly enzyme ISCU). [Source:Uniprot/SWISSPROT;Acc:Q9H1K1]
SRC	Cell death and survival	YMR161W	2.12275	ENSP00000316053	DNAJB8		DnaJ homolog subfamily B member 8 [Source:UniProtKB/Swiss-Prot;Acc:Q8NHS0]
SRC	Cell death and survival	YNL259C	2.80878	ENSP00000316854	ATOX1	Molecular Transport	Copper transport protein ATOX1 (Metal transport protein ATX1) [Source:UniProtKB/Swiss-Prot;Acc:O00244]
SRC	Cell death and survival	YDR005C	2.9155	ENSP00000318604	MAF1		Repressor of RNA polymerase III transcription MAF1 homolog. [Source:Uniprot/SWISSPROT;Acc:Q9H063]
SRC	Cell death and survival	YOR274W	2.27756	ENSP00000321810	TRIT1		tRNA isopentenyltransferase, mitochondrial precursor (EC 2.5.1.8) (Isopentenyl-diphosphate:tRNA isopentenyltransferase) (IPP transferase) (IPTase) (IPPT) (hGRO1). [Source:Uniprot/SWISSPROT;Acc:Q9H3H1]
SRC	Cell death and survival	YDL036C	2.90834	ENSP00000323288	RPUSD2		RNA pseudouridylate synthase domain containing 2 [Source:RefSeq_peptide;Acc:NP_689473]
SRC	Cell death and survival	YHL039W	2.4495	ENSP00000327436	SETD3		SET domain-containing protein 3 [Source:UniProtKB/Swiss-Prot;Acc:Q86TU7]
SRC	Cell death and survival	YDL066W	2.20757	ENSP00000331897	IDH2	Cancer	Isocitrate dehydrogenase [NADP], mitochondrial precursor (EC 1.1.1.42) (Oxalosuccinate decarboxylase) (IDH) (NADP(+)-specific ICDH) (IDP) (ICD-M). [Source:Uniprot/SWISSPROT;Acc:P48735]
SRC	Cell death and survival	YHR189W	2.07822	ENSP00000334277
SRC	Cell death and survival	YPL195W	2.86397	ENSP00000347416	AP3D1	Molecular Transport	AP-3 complex subunit delta-1 (Adapter-related protein complex 3 subunit delta-1)(AP-3 complex subunit delta)(Delta-adaptin) [Source:UniProtKB/Swiss-Prot;Acc:O14617]
SRC	Cell death and survival	YDL114W	2.03844	ENSP00000351035	HSD17B11	Small Molecule Biochemistry	Dehydrogenase/reductase SDR family member 8 precursor (EC 1.1.1.-) (17-beta-hydroxysteroid dehydrogenase 11) (17-beta-HSD 11) (17-beta- HSD XI) (17betaHSDXI) (17bHSD11) (17betaHSD11) (Retinal short-chain dehydrogenase/reductase 2) (retSDR2) (Cutaneous T-c [Source:Uniprot/SWISSPROT;Acc:Q8NBQ5]
SRC	Cell death and survival	YPL207W	2.34232	ENSP00000352645	TYW1	Cancer	tRNA wybutosine-synthesizing protein 1 homolog (tRNA-yW-synthesizing protein)(Radical S-adenosyl methionine and flavodoxin domain-containing protein 1) [Source:UniProtKB/Swiss-Prot;Acc:Q9NV66]
SRC	Cell death and survival	YMR284W	2.24243	ENSP00000353192	XRCC6	Cell Death and Survival	ATP-dependent DNA helicase 2 subunit 1 (ATP-dependent DNA helicase II 70 kDa subunit)(Lupus Ku autoantigen protein p70)(Ku70)(70 kDa subunit of Ku antigen)(Thyroid-lupus autoantigen)(TLAA)(CTC box-binding factor 75 kDa subunit)(CTCBF)(CTC75)(DNA-repair protein XRCC6) [Source:UniProtKB/Swiss-Prot;Acc:P12956]
SRC	Cell death and survival	YPL119C	2.05676	ENSP00000353284	DDX3Y		DEAD-box protein 3, Y-chromosomal. [Source:Uniprot/SWISSPROT;Acc:O15523]
SRC	Cell death and survival	YMR118C	2.35411	ENSP00000356953	SDHC	Cell Death and Survival	succinate dehydrogenase complex, subunit C, integral membrane protein, 15kDa [Source:HGNC Symbol;Acc:10682]
SRC	Cell death and survival	YOR286W	2.26426	ENSP00000357004
SRC	Cell death and survival	YOL060C	3.68889	ENSP00000358894	CNNM2		Metal transporter CNNM2 (Cyclin-M2)(Ancient conserved domain-containing protein 2) [Source:UniProtKB/Swiss-Prot;Acc:Q9H8M5]
SRC	Cell death and survival	YBL068W	3.66634	ENSP00000361512	PRPS1	Cell Death and Survival	Ribose-phosphate pyrophosphokinase 1 (EC 2.7.6.1)(Phosphoribosyl pyrophosphate synthetase I)(PRS-I)(PPRibP) [Source:UniProtKB/Swiss-Prot;Acc:P60891]
SRC	Cell death and survival	YJL208C	3.77634	ENSP00000361725	ENDOG	Amino Acid Metabolism	Endonuclease G, mitochondrial Precursor (Endo G)(EC 3.1.30.-) [Source:UniProtKB/Swiss-Prot;Acc:Q14249]
SRC	Cell death and survival	YEL056W	2.86398	ENSP00000362592	RBBP4	Cell Death and Survival	Histone-binding protein RBBP4 (Retinoblastoma-binding protein 4)(RBBP-4)(Retinoblastoma-binding protein p48)(Chromatin assembly factor 1 subunit C)(CAF-1 subunit C)(Chromatin assembly factor I p48 subunit)(CAF-I 48 kDa subunit)(CAF-I p48)(Nucleosome-remodeling factor subunit RBAP48) [Source:UniProtKB/Swiss-Prot;Acc:Q09028]
SRC	Cell death and survival	YPL220W	3.94867	ENSP00000363018	PRL10A		60S ribosomal protein L10a (CSA-19)(Neural precursor cell expressed developmentally down-regulated protein 6)(NEDD-6) [Source:UniProtKB/Swiss-Prot;Acc:P62906]
SRC	Cell death and survival	YBR170C	3.03837	ENSP00000363879	NPLOC4	Cellular Assembly and Organization	Nuclear protein localization protein 4 homolog (Protein NPL4) [Source:UniProtKB/Swiss-Prot;Acc:Q8TAT6]
SRC	Cell death and survival	YER073W	2.93971	ENSP00000366927	ALDH1B1		Aldehyde dehydrogenase X, mitochondrial Precursor (EC 1.2.1.3)(Aldehyde dehydrogenase family 1 member B1)(Aldehyde dehydrogenase 5) [Source:UniProtKB/Swiss-Prot;Acc:P30837]
SRC	Cell death and survival	YML097C	2.37218	ENSP00000370208	KCTD7		RAB guanine nucleotide exchange factor (GEF) 1 [Source:RefSeq peptide;Acc:NP_055319]
SRC	Cell death and survival	YDR011W	2.16124	ENSP00000371818	ABCA3	Cell Death and Survival	ATP-binding cassette sub-family A member 3 (ATP-binding cassette transporter 3)(ATP-binding cassette 3)(ABC-C transporter) [Source:UniProtKB/Swiss-Prot;Acc:Q99758]
SRC	Cell death and survival	YBR218C	2.44096	ENSP00000377530	PC	Small Molecule Biochemistry	Pyruvate carboxylase, mitochondrial Precursor (EC 6.4.1.1)(Pyruvic carboxylase)(PCB) [Source:UniProtKB/Swiss-Prot;Acc:P11498]
SRC	Cell death and survival	YIL042C	3.1695	ENSP00000378405	BCKDK	Cell Death and Survival	[3-methyl-2-oxobutanoate dehydrogenase [lipoamide]] kinase, mitochondrial Precursor (EC 2.7.11.4)(Branched-chain alpha-ketoacid dehydrogenase kinase)(BCKD-kinase)(BCKDHKIN) [Source:UniProtKB/Swiss-Prot;Acc:O14874]
SRC	Cell death and survival	YCR016W	3.70289	ENSP00000380286	C7orf50		chromosome 7 open reading frame 50 [Source:HGNC Symbol;Acc:22421]
SRC	Cell death and survival	YDR272W	2.59295	ENSP00000380514	HAGH	Molecular Transport	Hydroxyacylglutathione hydrolase (EC 3.1.2.6)(Glyoxalase II)(Glx II) [Source:UniProtKB/Swiss-Prot;Acc:Q16775]
SRC	Cell death and survival	YHR016C	2.17408	ENSP00000384269	SH3YL1		SH3 domain-containing YSC84-like protein 1 [Source:UniProtKB/Swiss-Prot;Acc:Q96HL8]
SRC	Cell death and survival	YDL134C	1.97897	ENSP00000384493	PPP2CB		Serine/threonine-protein phosphatase 2A catalytic subunit beta isoform (PP2A-beta)(EC 3.1.3.16) [Source:UniProtKB/Swiss-Prot;Acc:P62714]
TGFBR3	Cell death and survival	YLR205C	2.6638	ENSP00000216117	HMOX1	Cell Death and Survival	Heme oxygenase 1 (EC 1.14.99.3) (HO-1). [Source:Uniprot/SWISSPROT;Acc:P09601]
TGFBR3	Cell death and survival	YHL002W	2.32212	ENSP00000263904	STAM2		Signal transducing adapter molecule 2 (STAM-2). [Source:Uniprot/SWISSPROT;Acc:O75886]
TGFBR3	Cell death and survival	YEL011W	2.22135	ENSP00000264326	GBE1		1,4-alpha-glucan branching enzyme (EC 2.4.1.18) (Glycogen branching enzyme) (Brancher enzyme). [Source:Uniprot/SWISSPROT;Acc:Q04446]
TGFBR3	Cell death and survival	YDL070W	3.47105	ENSP00000305918	BRD3	Cancer	Bromodomain-containing protein 3 (RING3-like protein). [Source:Uniprot/SWISSPROT;Acc:Q15059]
TGFBR3	Cell death and survival	YOR150W	2.67668	ENSP00000306548	MRPL13		39S ribosomal protein L13, mitochondrial (L13mt) (MRP-L13). [Source:Uniprot/SWISSPROT;Acc:Q9BYD1]
TGFBR3	Cell death and survival	YER042W	1.99741	ENSP00000313921	MSRA	Small Molecule Biochemistry	Peptide methionine sulfoxide reductase (EC 1.8.4.6) (Protein- methionine-S-oxide reductase) (PMSR) (Peptide Met(O) reductase). [Source:Uniprot/SWISSPROT;Acc:Q9UJ68]
TGFBR3	Cell death and survival	YNL293W	1.9701	ENSP00000364580	GRTP1		Growth hormone-regulated TBC protein 1 (TBC1 domain family member 6) [Source:UniProtKB/Swiss-Prot;Acc:Q5TC63]
TGFBR3	Cell death and survival	YOR069W	2.56382	ENSP00000369638	SNX1	Nucleic Acid Metabolism	Sorting nexin-1 [Source:UniProtKB/Swiss-Prot;Acc:Q13596]
TGFBR3	Cell death and survival	YDL101C	2.10463	ENSP00000372023	CHEK2	Cell Death and Survival	Serine/threonine-protein kinase Chk2 (EC 2.7.11.1)(Cds1) [Source:UniProtKB/Swiss-Prot;Acc:O96017]
TGFBR3	Cell death and survival	YOR142W	2.7138	ENSP00000377446	SUCLG1	Small Molecule Biochemistry	Succinyl-CoA ligase [GDP-forming] subunit alpha, mitochondrial Precursor (EC 6.2.1.4)(Succinyl-CoA synthetase subunit alpha)(SCS-alpha) [Source:UniProtKB/Swiss-Prot;Acc:P53597]
TGFBR3	Cell death and survival	YHR193C	2.06436	ENSP00000377469	NACA	Protein Synthesis	Nascent polypeptide-associated complex subunit alpha (NAC-alpha)(Alpha-NAC)(Allergen Hom s 2) [Source:UniProtKB/Swiss-Prot;Acc:Q13765]
TSSK2	Cellular Assembly and Organization	YJL052W	3.08636	ENSP00000229239	GAPDH	Cell Death and Survival	Glyceraldehyde-3-phosphate dehydrogenase, liver (EC 1.2.1.12) (GAPDH). [Source:Uniprot/SWISSPROT;Acc:P04406]
TSSK2	Cellular Assembly and Organization	YMR285C	2.72003	ENSP00000309142	PDE12		2',5'-phosphodiesterase 12 (2'-PDE)(2-PDE)(EC 3.1.4.-) [Source:UniProtKB/Swiss-Prot;Acc:Q6L8Q7]
TSSK2	Cellular Assembly and Organization	YER041W	1.97482	ENSP00000318977	GEN1		Flap endonuclease GEN homolog 1 (EC 3.1.-.-) [Source:UniProtKB/Swiss-Prot;Acc:Q17RS7]
TSSK2	Cellular Assembly and Organization	YPL191C	2.64749	ENSP00000326194	FAM63B		Protein FAM63B [Source:UniProtKB/Swiss-Prot;Acc:Q8NBR6]
TSSK2	Cellular Assembly and Organization	YHR048W	3.30614	ENSP00000358515	SLC22A15		solute carrier family 22, member 15 [Source:HGNC Symbol;Acc:20301]
TSSK2	Cellular Assembly and Organization	YJR031C	1.96515	ENSP00000359000	GBF1	Cell Morphology	Golgi-specific brefeldin A-resistance guanine nucleotide exchange factor 1 (BFA-resistant GEF 1) [Source:UniProtKB/Swiss-Prot;Acc:Q92538]
ZAK	Cell death and survival	YMR167W	2.07888	ENSP00000231790	MLH1	Cell Cycle	DNA mismatch repair protein Mlh1 (MutL protein homolog 1). [Source:Uniprot/SWISSPROT;Acc:P40692]
ZAK	Cell death and survival	YML104C	2.45159	ENSP00000242044	SNX13		Sorting nexin-13 (RGS domain- and PHOX domain-containing protein)(RGS-PX1) [Source:UniProtKB/Swiss-Prot;Acc:Q9Y5W8]
ZAK	Cell death and survival	YBL067C	2.12063	ENSP00000282344	USP12		Ubiquitin carboxyl-terminal hydrolase 12 (EC 3.1.2.15) (Ubiquitin thiolesterase 12) (Ubiquitin-specific processing protease 12) (Deubiquitinating enzyme 12) (Ubiquitin hydrolyzing enzyme 1). [Source:Uniprot/SWISSPROT;Acc:O75317]
ZAK	Cell death and survival	YPL174C	2.212	ENSP00000303585	CLIP1	Small Molecule Biochemistry	CAP-Gly domain-containing linker protein 1 (Restin)(Cytoplasmic linker protein 170 alpha-2)(CLIP-170)(Reed-Sternberg intermediate filament-associated protein)(Cytoplasmic linker protein 1) [Source:UniProtKB/Swiss-Prot;Acc:P30622]
ZAK	Cell death and survival	YBL106C	2.35132	ENSP00000321826	STXBP5	Cellular Assembly and Organization	Syntaxin-binding protein 5 [Source:Uniprot/SWISSPROT;Acc:Q5T5C0]
ZAK	Cell death and survival	YEL020C	2.36147	ENSP00000323811	HACL1	Small Molecule Biochemistry	2-hydroxyphytanoyl-CoA lyase (EC 4.1.-.-) (2-HPCL). [Source:Uniprot/SWISSPROT;Acc:Q9UJ83]
ZAK	Cell death and survival	YMR009W	2.38076	ENSP00000333666	ADI1	Cell Death and Survival	membrane-type 1 matrix metalloproteinase cytoplasmic tail binding protein-1 [Source:RefSeq_peptide;Acc:NP_060739]
ZAK	Cell death and survival	YEL012W	2.67582	ENSP00000347836	UBE2H	Protein Synthesis	Ubiquitin-conjugating enzyme E2 H (EC 6.3.2.19) (Ubiquitin-protein ligase H) (Ubiquitin carrier protein H) (UbcH2) (E2-20K). [Source:Uniprot/SWISSPROT;Acc:P62256]
ZAK	Cell death and survival	YAL017W	3.58958	ENSP00000351475	PASK	Post-Translational Modification	PAS domain-containing serine/threonine-protein kinase (PAS-kinase)(PASKIN)(hPASK)(EC 2.7.11.1) [Source:UniProtKB/Swiss-Prot;Acc:Q96RG2]
ZAK	Cell death and survival	YMR027W	2.56782	ENSP00000356263	C6orf211		UPF0364 protein C6orf211 [Source:UniProtKB/Swiss-Prot;Acc:Q9H993]
ZAK	Cell death and survival	YER176W	2.26031	ENSP00000360817	ZNFX1		NFX1-type zinc finger-containing protein 1 [Source:UniProtKB/Swiss-Prot;Acc:Q9P2E3]
ZAK	Cell death and survival	YNL068C	2.00842	ENSP00000370256	FOXC1		Forkhead box protein C1 (Forkhead-related protein FKHL7)(Forkhead-related transcription factor 3)(FREAC-3) [Source:UniProtKB/Swiss-Prot;Acc:Q12948]
ZAK	Cell death and survival	YHR193C	2.5746	ENSP00000377469	NACA	Protein Synthesis	Nascent polypeptide-associated complex subunit alpha (NAC-alpha)(Alpha-NAC)(Allergen Hom s 2) [Source:UniProtKB/Swiss-Prot;Acc:Q13765]
